# Supplementary material for: Dietary Restriction and Rapamycin Affect Brain Aging in Mice by Attenuating Age-Related DNA Methylation Changes
Source: MDPI journal article supplement (doi:10.3390/genes13040699), 2022-04-15
Supplement: s1 [file s1]

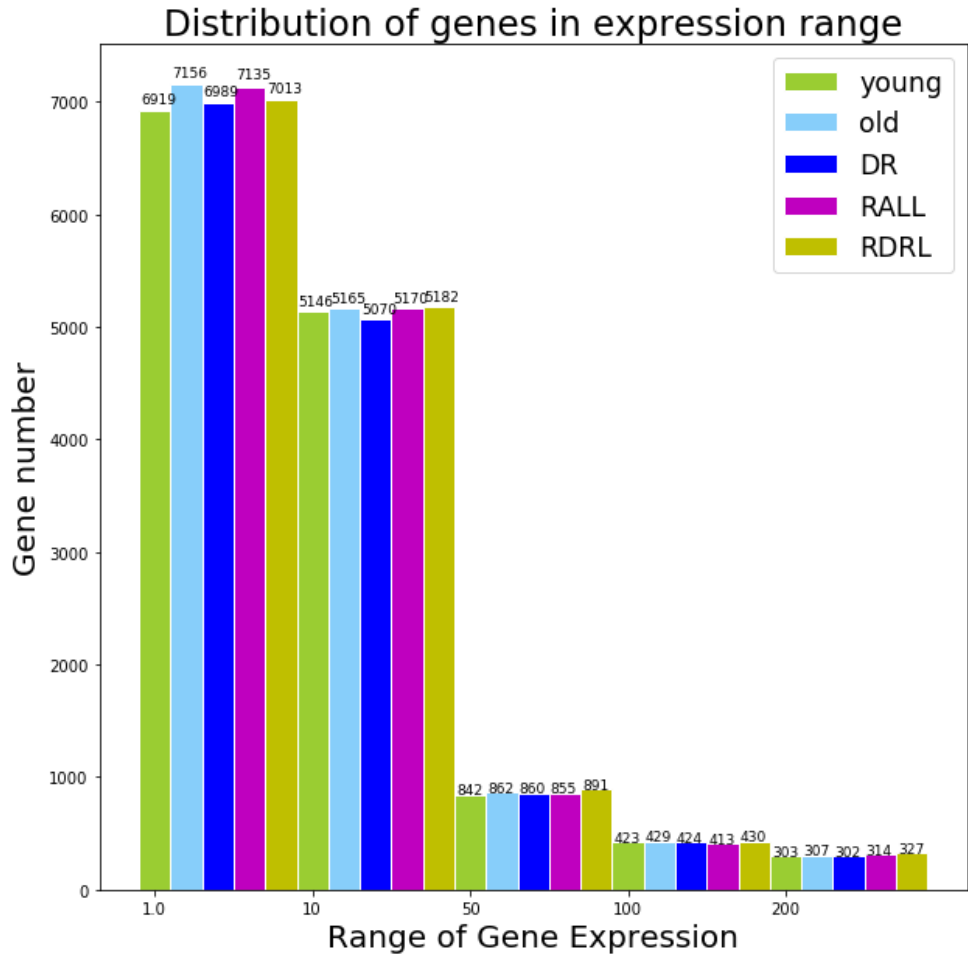

Figure s1 Distribution of genes in expression range. Number of genes in different ranges of expression for each group.
