# Supplementary material for: Dietary Restriction and Rapamycin Affect Brain Aging in Mice by Attenuating Age-Related DNA Methylation Changes
Source: Genes (Basel). 2022 Apr 15;13(4):699. doi: 10.3390/genes13040699 (PMC9030181; doi:10.3390/genes13040699)
Supplement: Supplementary file 1 [file genes-13-00699-s001.zip]

Archive with 14 entries (14 files):
- Figure S1 - Figure of distribution of genes in expression range.pdf
- Figure S2 - Figures of Gene Expression and DMR methylation.pdf
- Supplementary File S1 - Processing of DNA methylation and Gene expression.pdf
- Supplementary File S2 - Gene expression.txt
- Supplementary File S3 - CpG_methylation_level.txt
- Supplementary File S4 - Bin_locus_info.txt
- Table S1 - Differnt Expression Genes and DR_RALL ameliorate Genes .xlsx
- Table S2 - GO Enrichment of DR-DEGs.xlsx
- Table S3 - GO Enrichement of RALL-DEGs.xlsx
- Table S4 - Expression of DR-RALL-ameliorated-DEGs.xlsx
- Table S5 - Different Methylation Region and Genes.xlsx
- Table S6 - GO Enrichment of DR-related DMG.xlsx
- Table S7 - GO Enrichment of RALL-related DMG.xlsx
- Table S8 - Correlation of methylaion and gene expression of overlap DEGs and DMGs.xlsx
