# Supplementary material for: Dietary Restriction and Rapamycin Affect Brain Aging in Mice by Attenuating Age-Related DNA Methylation Changes
Source: Genes (Basel). 2022 Apr 15;13(4):699. doi: 10.3390/genes13040699 (PMC9030181; doi:10.3390/genes13040699)
Supplement: Supplementary file 1 [file genes-13-00699-s001.zip › Supplementary File S2 - Gene expression.txt]

Gene Symbol	young1	young2	young3	old1	old2	old3	DR1	DR2	DR3	RALL1	RALL2	RALL3	RDRL1	RDRL2	RDRL3
Plekhg2	1.01866	1.29472	1.06643	1.30508	1.189	1.78985	0.815357	1.41973	1.58798	1.82057	1.67161	1.32839	1.22228	1.14205	0.9781
Plekhg3	3.40312	5.17709	4.39972	4.80997	4.32591	4.33779	2.95366	4.81113	4.59549	5.26811	4.59942	4.20533	3.96812	3.95747	3.75398
Plekhg1	3.00267	3.27088	3.54596	3.37202	3.32686	3.51274	2.89243	3.56739	3.44513	3.44295	3.64718	3.42705	2.99863	2.45079	3.13433
Plekhg6	0.130856	0.0267709	0.0926811	0.140388	0.0141992	0.229446	0	0.0976164	0.107364	0.0562899	0.0577919	0.124939	0.18642	0.0371858	0.0342172
4930592I03Rik	0	0	0	0	0	0	0	0	0	0	0	0	0	0.0445623	0
Plekhg4	0.0682813	0.0931342	0.141139	0.130276	0.173016	0.057522	0.0103142	0.142377	0.101094	0.0979438	0.0603013	0.0652641	0.172946	0.237324	0.159703
Plekhg5	25.8371	28.711	31.0708	26.0265	31.9274	29.0333	27.8595	30.189	29.424	29.6823	27.1282	26.5657	25.2279	33.4647	30.2054
Nsa2	8.43612	8.77316	7.81819	8.55158	8.55076	8.67875	8.37568	8.18413	8.22934	8.4109	8.83225	8.81705	9.7625	9.48905	8.07372
Nampt	14.3764	14.116	14.0947	15.3115	14.293	14.3996	13.7042	14.6897	15.6268	15.0904	15.4556	14.5362	16.1109	14.783	14.49
Vmo1	0.393537	0.0805112	0.0696825	0.112588	0.0854056	0	0	0.293573	0.0717525	0.0677147	0.0695216	0.150297	0.0747521	0.0745554	0
Ndc1	3.63389	3.78071	3.42345	3.27662	3.58927	3.01129	3.86025	3.06996	3.25616	3.32677	3.55271	2.72822	3.20055	2.8685	3.57347
F930015N05Rik	0.0837085	0.25043	0.139883	0.316614	0.386872	0.291074	0.269795	0.316709	0.335464	0.111109	0.243507	0.374446	0.32474	0.223727	0.246444
4931406P16Rik	6.86121	8.1106	7.66336	7.61325	8.0536	7.7407	7.64008	8.19329	7.78413	7.80473	7.57395	6.26719	6.89804	5.71324	7.46587
Mier1	8.5201	7.88604	7.30156	8.73639	8.17303	8.02695	7.20553	8.08629	8.72641	8.51058	8.22951	7.92745	8.66729	7.93158	7.77004
Mier2	9.08935	9.47843	10.009	9.02878	9.77986	9.38454	8.08907	9.24992	10.1851	10.1903	9.04103	8.98847	10.2713	10.6854	10.3279
Mier3	3.80462	3.69487	4.10508	3.81655	3.42355	3.57354	3.40304	4.02325	3.80346	4.21729	3.63425	3.308	3.47958	3.73536	4.02865
Aqp11	15.5174	12.4688	12.3956	12.2759	13.3339	12.7072	13.9298	13.1063	13.5741	13.5495	13.6185	13.9656	12.5164	15.6344	13.3813
Aqp12	0	0	0	0	0	0	0	0	0	0	0.073738	0	0	0	0
M34969	0	0.146608	0	0	0	0	0	0	0	0.123306	0.159872	0	0.272242	0	0
1810010H24Rik	2.6752	2.23131	2.11339	2.59044	2.94753	2.54703	2.19228	1.84215	1.68841	1.91208	2.4357	2.35777	2.38441	2.69003	1.82955
AK162833	0.133851	0.328604	0.118503	0.172322	0.377629	0.441784	0.148536	0.266268	0.146428	0.0690939	0.212813	0.102239	0.127124	0.0507159	0.186668
Rpl31-ps12	73.1052	70.8222	64.0822	87.0989	78.1419	72.5195	83.4156	69.4716	69.8135	66.8525	80.2271	97.5309	98.8092	89.9696	72.3373
DQ565036	0	0	0	0	0	0	0	0	0	0	0	0	0	0	0
Dag1	24.5505	21.5258	23.6235	20.9298	20.6322	22.0768	25.9692	22.2758	25.1813	24.3592	21.747	21.962	22.958	19.6743	21.0329
Myadm	27.696	24.5582	24.8507	20.8178	21.6061	25.3951	25.498	22.5731	25.9799	25.7187	22.1487	22.1537	22.6834	24.2672	24.3181
DQ725616	0	0	0	0	0	0	0	0	0	0	0	0	0	0	0
Gm15008	0.147336	0	0	0	0.156129	0	0	0	0	0	0	0	0.137781	0	0
Sacs	2.66102	3.26767	4.97405	2.21762	3.20189	3.95483	3.61426	3.38279	3.80637	3.7414	2.95552	2.63567	1.79627	0.668672	3.59366
Trav9-4	0	0.136311	0.0811132	0.0953343	0.0541964	0	0	0.528377	0	0	0.176626	0.0874668	0.183223	0.0377243	0.0560665
DQ553968	4.67491	5.0245	4.81869	4.88434	4.41805	4.4668	5.1075	5.09662	4.9519	5.08847	5.23322	4.7142	4.98144	5.23692	5.12568
Trav9-1	0	0	0	0	0	0.0335919	0	0.0404925	0	0	0	0	0.0463976	0	0
Trav9-2	0.0109891	0	0.0535097	0.0183395	4.50E-07	0	0	2.58E-07	0	0.0237733	0	0.0134769	3.15E-07	4.01E-07	0.0223496
Zfp712	1.51119	1.70675	1.7175	1.49419	1.52128	1.44771	1.56574	1.64782	1.78561	1.73421	1.47666	1.52224	1.45151	1.49324	1.79107
Zfp710	4.71297	4.85947	5.1808	5.3159	5.30336	4.9304	5.45345	5.43301	5.45834	5.00116	5.01365	4.86333	5.94387	5.4664	5.57669
Zfp711	1.98808	2.16828	2.40367	2.15169	1.99894	2.0414	1.33009	1.80929	2.15693	2.4561	1.67226	1.77301	1.70091	2.08172	2.22433
Zfp715	5.53319	5.96836	5.96506	6.34958	6.30031	5.78555	5.58878	6.6154	6.29391	6.10629	5.44412	5.27644	6.1348	5.99616	6.32286
Mllt4	11.7872	13.8273	14.7808	12.2689	13.2617	15.1194	11.9233	14.4453	13.7702	13.4496	13.1679	12.5942	11.4675	13.331	14.3513
Mllt6	20.9198	22.2667	20.0244	22.337	21.3636	21.346	19.5304	20.1449	19.4639	20.8889	23.3373	22.5743	22.3791	21.7434	21.6126
Zfp719	3.44592	3.51702	3.95651	3.35311	3.70579	3.54629	3.84533	3.73445	3.82861	3.8547	3.54312	3.41496	3.64532	3.46815	3.70416
Mllt1	24.4978	22.4863	22.1437	25.401	23.4894	22.3015	26.4473	24.6545	22.7966	22.8121	23.0816	26.4785	26.0819	24.3737	25.516
Mllt3	8.13877	8.03584	10.1796	9.78064	9.65327	9.64717	9.43027	14.5828	9.87978	10.5711	10.3507	8.66924	8.23789	8.94943	9.53622
Btg4	0	0	0	0	0	0	0	0	0	0	0	0	0	0	0
Btg3	8.89579	8.77939	8.59323	8.91813	8.35381	8.22554	6.49945	8.65582	8.59665	8.27134	8.26429	8.84527	9.37585	9.64776	9.13439
Btg2	7.13943	5.32678	4.75759	4.74031	9.89897	7.60136	5.21084	6.7767	6.6602	5.38278	7.25553	4.4589	8.49405	5.07817	4.60585
Btg1	6.2569	6.05518	6.2862	7.09661	6.32344	6.31909	6.96891	6.15858	6.87838	6.55727	7.17248	6.71342	9.56913	8.0695	6.64332
AK084120	0	0	0	0	0	0	0	0	0	0	0.0505148	0	0	0	0
Smok3a	0	0	0	0.00736783	0	0	0	0	0	0	0	0	0	0	0
Smok3c	0	0	0	0.00454174	0	0	0	0	0	0	0	0	0	0	0
Smok3b	0	0	0	4.74E-07	0	0	0	0	0	0	0	0	0	0	0
Z86032	0	0	0	0	0	0	0	0	0	0	0	0	0	0	0
Z86036	0	0	0	0	0	0	0	0	0	0	0	0	0	0	0
Nupl2	1.87698	2.26506	1.87505	1.77346	1.72149	2.02365	2.06579	2.13331	2.05251	1.92139	1.83298	2.06044	1.99842	2.09177	1.51943
Hoxd3os1	0	0	0	0	0	0	0	0	0	0	0	0	0	0	0
Npat	3.18699	3.36025	3.07951	3.37858	3.45261	3.16481	2.70399	3.26033	3.22506	3.50499	3.07012	2.80162	3.04642	3.28021	3.37568
Ttc30a1	1.37344	1.287	1.64364	1.48253	1.55585	1.32375	1.51317	1.37592	1.29212	1.60289	1.25485	1.41722	1.49003	1.50794	1.22679
DQ565694	0	0	0	0	0	0	0	0	0	0	0	0	0	0	0
Gga1	21.5418	20.2048	20.2126	20.4672	19.5616	19.8157	19.3987	19.9862	19.3654	20.0002	18.9817	20.1701	21.3741	21.0096	19.7975
AK202768	10.7032	15.6703	14.7796	15.6957	9.00908	11.7871	21.4654	12.1923	11.4786	17.9233	8.27009	11.0633	21.8407	15.4461	15.7491
Gga3	55.7116	64.4224	64.8648	53.6054	47.0016	52.8593	49.5358	55.1589	46.5127	50.2097	44.5106	42.0362	45.7948	37.6926	53.6216
1700018C11Rik	0	0	0	0.0562454	0	0	0	0.0977729	0	0	0	0	0	0	0
DQ685120	0	0	0	0	0	0	0	0	0	0	0	0	0	0	0
Sorbs1	44.5469	47.5603	49.1243	49.2893	51.5647	55.7397	43.7296	41.4583	37.7504	45.2544	62.0388	56.7298	49.9512	46.5165	46.5425
Sorbs3	14.8929	21.6947	10.3664	23.7008	20.504	21.1402	14.1063	18.1931	14.5497	17.5875	16.0006	19.4068	20.6499	18.3671	14.7263
Sorbs2	20.5059	18.7578	20.5994	18.3355	19.1532	20.0256	18.2601	19.79	21.9008	21.0699	19.004	18.3785	18.6638	17.8451	19.9718
Tshz2	17.6144	27.0763	22.444	24.6407	13.3223	19.5292	15.8724	18.4997	20.6061	20.2391	12.2187	25.8241	21.2991	11.4757	28.7461
Tshz3	3.04791	3.22771	3.75877	3.17935	2.69915	3.0566	2.85409	3.08314	3.44349	3.42144	1.89539	3.00906	2.91662	2.59623	3.7407
DQ564349	0	0	0	0	0	0	0	0	0	0	0	0	0	0	0
Tshz1	6.66713	5.43818	5.61857	5.96457	5.86037	6.09534	6.40566	6.18115	6.50542	5.73262	5.5426	5.693	6.54123	5.42609	6.00752
DQ907162	0	0	0	0	0	0	0	0	0	0	0	0	0	0	0
BC044745	0.0471465	0.00947176	0.0491414	0.00956617	0	0.0177368	0.0515772	0.190706	0.0523035	0.00690415	0.0409729	0	0.0103932	0.0185104	0
Bbof1	0.681736	0.875276	0.862527	1.11482	0.966918	1.16196	0.514138	1.28222	0.800885	1.11907	0.823125	0.564997	0.902821	1.04762	1.12652
DQ702206	0	0	0	0	0	0	0	0	0	0	0	0	0	0	0
DQ565966	0	0	0	0	0	0	0	0	0	0	0	0	0	0	0
Speer4d	0.00428569	0.00931582	0	0.0122611	0.00837076	0.0079567	0.00963071	0.023978	0.011721	0	0	0.0134449	0.00814066	0.0142087	0.00709749
Speer4e	0.00395444	0.0249783	0.00315091	0.0210326	0	0.0298475	0.0220512	0	0.0221708	0.00661099	0.00600148	0.0353427	0.0159618	0.0204951	0.0143042
Speer4a	0.0451133	0.0485645	0.0680347	0.033803	0.0659362	0.138676	0.0149848	0.0705129	0.0400498	0.00813217	0.0780945	0.0703945	0.0173134	0.0754348	0.100271
Speer4b	0.0538286	0.0558213	0.0727946	0.0346725	0.0309981	0.106576	0.0691663	0.0290598	0.0141908	0.0423025	0.0770752	0.0370283	0.00657731	0.08364	0.0395102
DQ706184	0	0	0	0	0	0	0	0	0	0	0	0	0	0	0
DQ709520	0	0	0	0	0	0	0	0	0	0	0	0	0	0	0
Arhgef28	14.1866	13.5994	15.221	12.3652	13.8435	15.3078	16.6117	14.702	15.8708	14.8304	14.5593	11.8605	13.2509	12.3637	14.5357
Pard3	4.08058	5.18672	5.27965	5.83911	4.32855	5.47192	4.35254	4.92884	4.89022	5.78766	5.06403	4.29358	5.73232	4.20935	4.87439
AK016734	0	0	0	0	0	0	0	0	0	0	0	0	0	0	0
AK202495	330.135	278.408	271.977	298.723	289.567	280.753	330.43	282.456	289.157	288.551	262.892	323.079	333.093	321.017	284.038
AK202494	111.436	100.933	92.4729	112.765	104.532	99.4498	101.167	97.0116	103.48	97.6889	103.419	113.651	111.326	123.049	99.3026
Arhgef25	86.5586	90.5727	92.956	86.1166	103.151	89.8221	87.2148	93.4327	90.668	92.1423	97.9275	87.5547	84.7781	105.613	86.5832
Arhgef26	12.8384	12.1001	11.9264	11.0524	12.1558	12.155	14.7209	11.5289	12.5363	13.0284	12.0749	11.2449	12.9767	11.3795	11.3122
Mkl1	17.5725	18.3445	22.2635	18.7284	18.4997	18.5624	20.4871	19.7703	20.0837	18.6464	17.7431	20.1605	19.0733	20.9083	20.2119
Mkl2	32.4541	31.4477	36.5211	26.345	31.0893	33.7631	34.4478	32.5237	33.7625	31.961	31.571	30.0395	28.5708	23.9878	35.9892
AK007159	0.00353984	0.00398306	0.00727773	0.0102679	0.0129103	0.0145029	0	0.00403435	0.00838136	0.00676766	0.00742594	0.00784152	0.00336195	0	0.0167812
AK017280	2.26355	3.36798	3.57207	3.98861	3.37211	3.23844	1.25411	3.59246	3.25314	3.09728	3.15399	1.40939	2.15484	2.1591	3.57922
DQ707587	0	0	0	0	0	0	0	0	0	0	0	0	0	0	0
Lmna	13.2198	14.0928	12.0196	13.1377	13.3038	13.5192	13.1058	15.4321	14.8851	13.535	12.7813	17.5869	17.3814	17.0358	13.7234
Fndc3c1	0.00799391	0	0	0	0.00867422	0.00412257	0	0	0	0.00687745	0	0.00763247	0	0.00757222	0
Gm17333	0	0	0	0	0	0	0	0	0	0	0	0	0	0	0
Mcemp1	0.0396935	0.0812063	0.105426	0.11356	0.215358	0.163764	0.088097	0.0987025	0.108558	0	0.280487	0.113696	0.188494	0.112799	0.0691957
Sorcs1	2.50972	3.2767	2.21514	2.35145	2.17001	2.85524	2.03615	2.08938	2.64966	2.75367	2.34613	2.34528	2.54382	1.61467	2.38632
Sorcs2	13.9045	11.0427	11.5807	10.4218	10.9567	12.7373	13.3294	11.1902	11.8145	11.6753	11.3161	11.2135	11.9156	10.3126	11.9559
Supt16	13.2356	13.7234	14.632	13.2155	14.1353	13.6386	12.38	12.792	14.6649	14.7093	13.776	13.6285	14.025	14.0306	14.7529
Trim34a	0.411105	0.631215	0.544218	1.12006	0.908724	1.29005	0.785037	0.897023	0.624946	0.426954	1.56399	0.841633	1.35142	0.663886	0.71954
Trim34b	0.160121	0.365069	0.262079	0.44666	0.431919	0.432868	0.356425	0.229505	0.388189	0.205606	0.57125	0.393122	0.660721	0.359472	0.344807
AK156859	0	0	0	0	0	0	0	0	0	0	0	0	0	0	0.031202
4933412E24Rik	0	0	0	0	0	0	0	0	0	0	0	0	0	0	0
Cdhr1	2.56055	1.53478	2.23513	1.99204	1.61833	1.62168	2.04387	1.70906	1.44153	2.28796	1.2618	1.32103	2.22708	1.46379	1.54271
Cdhr2	0.0845076	0.115259	0.0249392	0.120885	0.0815106	0.0968484	0.125039	0.151766	0.11984	0.0807833	0.132702	0.170338	0.151604	0.133416	0.196424
Cdhr3	0.537192	0.685342	0.474679	0.766715	0.799706	0.428465	0.520463	0.816341	0.641136	0.668932	0.343242	0.511756	0.496339	0.583872	0.455504
Cdhr4	0.386524	0.845789	0.267345	0.895785	0.575282	0.528178	0.205544	0.621999	0.476341	1.11946	0.807314	0.779801	0.311747	0.596094	0.465825
Cdhr5	0.0189966	0	0	0	0	0.0195937	0.0210809	0.0236187	0.0138478	0	0	0	0.0360847	0.0359897	0
Gm36633	0	0	0	0	0	0	0	0	0	0	0	0	0	0	0
Gm12866	0.0251096	0.025685	0	0.0718367	0	0.0517974	0.055729	0	0.0228908	0.0432053	0.0443582	0	0.0476955	0.04757	0.0437723
Tcof1	4.66867	4.93295	4.9463	5.42805	4.89755	5.0048	4.57339	5.09105	5.62987	4.69236	4.34893	5.36176	5.486	5.07194	5.90386
Gm3279	0.165926	0.169728	0.036725	0.148344	0.135035	0.342281	0.0920652	0.0515742	0	0.142752	0.109921	0.198029	0.0393969	0.196466	0.180781
DQ563521	0	0	0	0	0	0	0	0	0	0	0	0	0	0	0
AK191080	30.677	26.5251	12.8018	26.3433	9.26459	28.5008	19.3515	18.2001	14.7449	25.9034	23.2282	18.6739	15.9105	5.78458	12.8881
DQ696813	0	0	0	0	0	0	0	0	0	0	0	0	0	0	0
DQ697546	0	0	0	0	0	0	0	0	0	0	0	0	0	0	0
DQ696815	0	0	0	0	0	0	0	0	0	0	0	0	0	0	0
AK027991	0	0	0.0488199	0	0	0	0	0	0	0	0	0	0	0	0
Olfr523	0	0	0	0	0	0	0	0	0	0	0	0	0	0	0
Olfr522	0	0	0	0	0	0	0	0	0	0	0	0	0	0	0
Olfr521	0	0	0	0	0	0	0	0	0	0	0	0	0	0	0
Olfr520	0	0	0	0	0	0	0.0547214	0	0	0	0	0	0	0	0
Olfr527	0	0	0	0	0	0	0	0	0	0	0.0455692	0	0	0	0
Olfr525	0	0	0	0	0	0	0	0	0	0	0	0	0	0	0
Olfr524	0	0	0	0	0	0	0	0	0	0.0420861	0	0	0.04646	0	0
Gm10640	0.0792162	0.0405158	0.210399	0.198303	0.257873	0.163412	0.0879075	0.0492451	0.0722164	0.238534	0.174928	0.113452	0.112853	0.0375187	0.138094
Gm10649	0.276337	0.141335	0.220186	0.237174	0.209898	0.199515	0.214659	0.2405	0.428262	0.237742	0.268495	0.237458	0.15747	0.104704	0.361293
DQ541037	0	0	0	0	0	0	0	0	0	0	0	0	0	0	0
DQ708348	0	0	0	0	0	0	0	0	0	0	0	0	0	0	0
5730435O14Rik	0	0	0	0	0	0.0919917	0	0.110889	0	0.0767322	0.0787796	0	0.0847067	0	0
Usp8	14.7667	17.9557	15.8897	16.1502	16.6221	16.5352	14.6957	17.7648	16.7817	16.5639	16.3395	15.3889	16.7024	14.7812	16.3974
BC145376	0	0	0	0	0	0	0	0	0	0	0	0	0	0	0
Usp2	16.0331	15.5297	15.301	14.637	15.9975	17.7428	13.5388	14.6561	13.8653	14.2517	15.9371	14.5977	14.3625	15.5346	16.1187
Usp3	3.0721	3.24335	2.99554	2.91608	2.99919	2.96392	2.21017	2.7858	2.99362	3.03695	2.71811	2.4962	3.16592	2.65978	3.15828
Usp4	21.6401	21.3706	22.2167	20.5334	22.0618	22.001	20.9341	21.3796	22.3761	21.7118	22.3814	22.5354	22.3396	23.2373	22.5461
Usp5	76.9401	68.7121	61.0631	67.4281	70.6486	67.3432	68.1951	68.0526	63.1931	64.0722	69.5496	74.0256	77.1916	83.1625	67.9724
Usp7	24.3158	26.3817	25.4881	23.5789	24.8011	24.0846	22.8964	25.4422	25.3127	25.3727	23.002	22.7329	23.385	24.4908	26.9291
M26448	0.0968756	0.0990958	0.314481	0.138577	0.21024	0.0999203	0.107504	0	0.147192	0.0833456	0.256709	0.154159	0.184015	0.275296	0.140732
Rpl38	214.377	220.165	185.171	239.282	211.365	215.331	235.567	209.081	195.945	204.774	222.149	259.492	258.986	259.178	223.101
Rpl39	191.589	173.21	138.287	203.637	166.333	170.879	209.44	165.993	165.876	148.688	202.542	202.932	239.354	214.351	164.458
Rpl36	140.696	125.874	110.738	155.416	129.72	124.489	126.724	134.706	124.859	118.197	136.012	149.995	172.261	149.054	115.98
Rpl37	59.1236	51.5228	44.1463	60.1491	53.9768	49.9936	63.658	51.6922	48.0281	44.3455	56.3129	62.1749	66.8245	63.1752	50.4925
Rpl34	103.794	96.428	90.8186	119.071	96.2598	90.4223	108.461	86.2974	92.4979	85.5632	111.007	113.184	126.458	115	87.2412
Rpl35	119.931	108.586	96.9399	129.668	111.346	101.49	130.428	108.212	105.748	104.987	124.876	134.948	145.001	137.112	108.147
Rpl32	185.707	172.233	148.38	200.941	175.42	153.298	188.415	168.099	164.41	156.672	194.292	200.932	234.331	203.048	167.075
Rpl30	107.219	108.911	90.9964	122.149	105.141	110.721	136.348	104.448	103.011	95.8284	119.536	119.607	135.531	131.621	98.1226
Rpl31	5.18315	5.41508	4.88914	5.67678	5.64005	5.52147	5.98233	4.78462	4.94115	5.28902	5.38472	5.72255	5.3379	5.36644	5.34309
Cd302	6.05696	5.92639	5.7199	9.60143	6.64725	7.43759	6.88419	5.64939	6.42661	5.39249	7.91008	6.65963	8.34751	7.61181	5.65782
AK182874	9.27793	8.79333	4.06863	4.04754	6.44831	0.00366698	4.81541	6.25723	8.0132	2.52027	11.739	3.68773	11.4487	6.9273	6.38808
Fam13c	24.9305	24.0863	26.113	23.2209	25.6313	27.9473	22.657	24.4246	26.1317	26.2537	22.1973	19.8375	23.3409	24.8955	23.7373
Fam13a	4.68444	5.37235	5.43138	5.03859	5.28838	5.11971	3.60889	5.04018	4.62365	5.47176	4.63108	4.32642	4.12392	4.51413	4.64843
Bcas2	29.3488	28.3299	26.1295	30.9945	30.2679	26.766	26.8788	28.9525	28.8317	29.7376	26.1866	29.1789	31.9829	33.3808	28.6198
Bcas3	26.0921	28.5455	27.0253	28.5976	25.4472	29.4814	32.0953	25.9075	26.3319	28.0398	24.9235	27.7641	25.288	28.2454	25.6076
Bcas1	44.1474	93.9284	45.2221	97.5035	96.3665	77.5689	50.1519	72.4392	65.6501	51.1232	88.7653	96.9494	81.5218	73.2436	61.6929
Gm8369	0.0629669	0.0743782	0.0278735	0.135108	0.0683256	0.036081	0	0	0.057403	0.0270863	0.0324439	0	0.089704	0.0298226	0.0329301
Gm8363	0.647619	0.562088	0.686296	0.638653	0.628201	0.799543	0.609784	0.81739	0.632139	0.607822	0.62404	0.815081	0.68031	0.743583	0.667114
Krtap28-13	0	0	0	0	0	0	0	0	0	0	0.0412899	0.0446319	0.0887928	0	0
Hist3h2ba	26.8404	23.8897	26.4804	22.4137	22.1533	21.941	18.1405	25.0282	21.7355	27.3908	19.2312	23.9229	26.1696	25.2217	21.0304
AB336401	0	0	0	0	0	0	0	0	0	0	0	0	0	0	0
Mlycd	8.57498	9.64255	8.0567	9.92887	6.76731	7.87004	9.65637	10.6391	7.65325	8.52964	7.81646	11.58	11.2263	11.8756	6.96882
Hist4h4	0.156741	0	0	0.112106	0	0	0	0	0	0.134849	0	0	0	0	0.136619
Rpl3l	0.0946121	0.0968038	0.167548	0.157897	0.191474	0.136501	0.13999	0.117632	0.0287506	0.113858	0.0835903	0.0903496	0.059906	0.0597483	0.153804
DQ715130	0	0	0	0	0	0	0	0	0	0	0	0	0	0	0
Ttbk2	10.0982	11.3437	11.9087	9.32707	9.32379	11.1259	10.196	10.9599	11.2888	10.8099	9.87553	9.37218	8.60515	7.25502	12.0606
Gm10046	0.315349	0.262068	0.277239	0.543502	0.236365	0.336164	0.247316	0.340975	0.580946	0.403644	0.403827	0.173696	0.423908	0.298504	0.618993
Ttbk1	24.8719	23.9133	25.3984	23.4017	23.228	23.094	27.1218	24.2479	23.9212	23.3869	22.0241	24.5726	23.1216	17.1216	25.2828
Ncor2	39.9072	44.7331	48.1833	42.5734	42.8465	46.0685	50.003	49.1058	46.3962	43.2031	49.0362	50.6599	42.702	49.4121	51.8928
Ncor1	51.7176	58.7421	68.4406	50.7294	52.4014	53.6344	55.7077	56.2843	58.8405	65.763	53.2629	57.741	45.8799	36.2815	59.6323
1810010D01Rik	0	0.0515453	0.089225	0.108123	0.0546788	0	0.0559191	0	0.0459378	0.0433527	0.0445095	0.048112	0.0957164	0.0477322	0.131765
BC089553	1.03E-08	0.0112893	0.000348119	0.0026597	0.049501	0.0204483	2.95E-33	0.0163893	0.00970889	0.0137053	0.00457374	0.00784674	2.25E-23	0.00792825	0.0846488
Nkiras2	3.9529	3.72086	3.96362	3.66746	3.85797	3.25072	3.52268	4.05573	3.18169	4.02056	3.17791	3.55309	4.28433	3.53038	3.85448
Gkn1	0	0	0	0.0259311	0	0	0.0804666	0.0450768	0	0	0	0.0346162	0	0	0.0632024
Gkn2	0	0	0	0	0	0	0.142676	0	0	0	0	0	0	0	0
Gkn3	1.56347	2.0471	1.32883	2.68378	2.64657	1.67711	2.429	1.01081	1.93843	2.36739	1.381	2.38844	1.4849	1.30327	0.763144
Magohb	5.11236	4.55907	5.33855	3.9378	4.62286	3.78577	4.29132	3.74855	4.48136	4.6239	4.11045	4.56831	4.17071	4.47016	5.02735
Nkiras1	15.0473	15.9319	15.1095	15.9124	15.4172	14.6834	14.0301	15.6651	15.4211	14.636	14.3861	17.063	15.922	17.0682	16.2473
Rab4a	19.9425	18.3097	19.0326	20.0431	17.7022	16.1346	18.6451	18.6529	18.5973	17.8131	17.1572	20.4965	20.7938	22.9921	18.7113
Ppme1	69.1974	62.6428	61.1194	59.8194	62.3557	62.8117	69.3796	63.952	64.7798	62.5008	57.9086	65.6121	65.2497	65.5148	64.6904
DQ694005	0	0	0	0	0	0	0	0	0	0	0	0	0	0	0
Gm6356	0.0590395	0.0682377	0.0453965	0.0717295	0.0532199	0.0621738	0.0436125	0.0360224	0.0729465	0.0531202	0.0527871	0.0748149	0.0587669	0.0642537	0.0465653
Gltpd2	0.0737449	0.0377175	0	0.0527448	0	0	0.0818359	0.0916877	0.201686	0.0634454	0	0.0352053	0.105059	0	0.0642779
Gm19276	0	0	0	0	0	0	0	0	0	0	0	0	0	0	0
Gm19277	0	0	0	0	0	0	0	0	0	0	0	0	0	0	0
Cep162	1.42539	1.72081	1.88973	1.70691	1.54277	1.64557	1.20039	1.7902	1.75787	2.05735	1.66807	1.4093	1.51525	1.13088	1.7049
Gm19279	0	0	0	0	0	0	0	0	0	0	0.0390594	0	0	0	0
Gm14015	0.0885242	0.0704301	0.0609574	0.0422103	0.0320193	0.111597	0.0654912	0.0611461	0.0179338	0.0507737	0.0347524	0.0187826	0.037367	0.055903	0.0428667
Fam234b	58.6891	60.213	59.6547	52.3351	56.4581	59.4048	59.5351	55.5299	57.7752	57.4083	55.6905	59.2511	54.6698	58.2069	60.0576
Lrriq1	0.346532	0.434657	0.490257	0.345835	0.2544	0.465364	0.192579	0.450509	0.402369	0.56636	0.414172	0.335762	0.443512	0.159614	0.315831
Fam234a	6.1641	6.43441	6.64934	7.18059	6.41765	6.73039	6.09778	5.4477	6.84241	6.99196	7.10214	6.85872	7.06515	6.90361	5.70843
DQ547069	0	0	0	0	0	0	0	0	0	0	0	0	0	0	0
Ythdc1	19.6808	20.7356	22.1041	22.0954	20.9727	19.9378	18.7621	21.779	21.1009	22.5695	21.7494	22.952	21.6843	25.1762	23.3084
Vmn2r84	0.0674045	0.0622379	0.0981191	0.0568064	0.067394	0.156417	0.0203283	0.0699534	0.0337575	0.0544847	0.0923448	0.0687948	0.0813975	0.0449916	0.0738277
Vmn2r85	0.0647049	0.0434441	0.0632852	0.0829044	0.084324	0.0942156	0.0290034	0.0698641	0.0670713	0.0746522	0.0756053	0.0886703	0.0440598	0.0523613	0.060065
Vmn2r86	0.0281867	0.0542766	0.0820059	0.0433856	0.0816966	0.0512148	0.0290776	0.0374648	0.0600768	0.0601903	0.0658467	0.0563739	0.0416841	0.0450492	0.0510832
Vmn2r87	0.163131	0.105203	0.251353	0.20306	0.146523	0.330937	0.113403	0.213387	0.122184	0.155999	0.152639	0.131428	0.118831	0.109086	0.159568
Vmn2r80	0	0	0	0	0	0	0	0	0	0	0	0	0	0	0
Vmn2r81	0	0	0	0	0	0	0	0	0	0	0	0	0	0	0
Vmn2r82	0	0	0	0	0	0	0	0	0	0	0	0	0	0	0
Vmn2r83	0	0	0	0	0	0	0	0	0	0	0	0	0	0.0145933	0
Tinf2	3.02365	4.61487	3.10186	4.68566	4.37463	3.66321	3.32876	3.66982	4.616	3.44783	3.81538	4.5137	4.83176	4.04618	3.93232
Vmn2r88	0.00621629	0.00596133	0.00171945	0.00361237	0.0118049	0.00237721	0	0	0.00460433	0	0.00171548	0.00296724	0	0.00478419	0.00609568
Vmn2r89	0.00510468	0	0	0.00196555	0.00223622	0.00496136	0	0	0	0	0	0.00524893	0.00261002	0	0
AB339095	0	0	0	0	0	0	0	0	0	0	0	0	0	0	0
DQ555032	0	0	0	0	0	0	0	0	0	0	0	0	0	0	0
AK158152	0.0357822	0.115218	0.0570638	0.132405	0.0662554	0.0946274	0.0354229	0.043544	0.167474	0.0510639	0.0508913	0.0883547	0.116609	0.0306139	1.36E-25
AK193649	167.195	151.839	116.448	127.392	141.11	149.321	169.209	154.552	134.816	118.626	154.179	178.073	172.69	200.377	134.857
Egf	0.0732052	0.149724	0.224541	0.183251	0.285783	0.189064	0.0541569	0.0910167	0.167145	0.217746	0.148906	0.163093	0.22343	0.189056	0.140251
AK158157	0	0.0311405	0	0.0108869	0	0	0	0	0	0.0130955	0	0	0	0	0
Slc4a11	0.0983274	0.238879	0.195869	0.325262	0.186717	0.22819	0.122755	0.259784	0.291326	0.296081	0.282268	0.222969	0.268485	0.209566	0.171409
Slc4a10	44.7752	47.6402	50.6318	41.8782	40.4891	46.5451	43.437	48.5777	48.6915	54.2332	42.3863	43.9839	45.5389	53.1935	46.8249
Nlrp4e	0	0	0	0	0	0	0	0	0	0	0	0	0	0	0
4930519G04Rik	0.00167101	0.00393141	0.00136561	0.0014342	0	0.00188021	0.00171171	0	0.00152336	0.00361462	0.00253027	0	0.00714168	0.00681453	0
BC026585	4.65114	6.29411	3.27623	7.45824	4.71692	6.29121	5.46447	6.83509	4.27111	4.29365	7.08389	6.2885	6.73187	6.24633	5.19284
1700013D24Rik	0	0	0	0	0	0	0	0	0	0	0	0	0	0	0
AK144912	0.0195163	0	0	0.0159528	0.0181519	0.0287567	0.00928181	0	0.0101667	0	0.0305369	0	0	0.0118844	0
Pold1	1.29269	1.83484	1.50533	2.25437	1.62614	1.39231	1.34565	1.77789	1.36843	1.62393	1.41465	1.82405	2.08605	1.47373	1.85941
Pold2	6.62833	6.56585	7.0957	7.28498	7.50146	6.97176	6.57059	6.38438	6.99799	7.6861	5.84988	7.75445	9.03231	8.65868	6.41682
Pold3	4.80525	5.61565	5.87439	6.3182	4.98563	5.73027	4.63107	5.53247	5.89287	6.01306	5.95385	5.65037	6.22674	6.40988	5.61033
Pold4	8.65508	10.8273	9.4364	11.4437	11.9947	7.59951	8.18478	9.88747	8.10001	8.3924	13.1355	9.56506	14.2183	10.8355	8.04123
Hdac1	9.10992	8.89222	9.6895	10.3327	9.47804	10.095	8.35127	10.0305	9.52123	9.79251	10.6062	10.2107	11.8398	10.1894	7.66789
DQ542718	0	0	0	0	0	0	0	0	0	0	0	0	0	0	0
Hdac3	27.7036	29.2684	29.2957	31.8888	30.6749	28.2519	24.9543	28.4771	28.8359	28.8962	28.3609	26.2978	31.5701	35.0812	27.2933
Hdac2	36.017	30.6379	34.4042	30.9042	33.8458	32.8794	30.3668	32.6972	33.5975	35.2098	32.8735	33.1126	33.6172	36.5194	34.2206
Hdac5	51.5996	44.7484	42.1056	49.6217	45.3349	44.8248	49.97	48.0443	45.2313	42.1085	43.0248	49.9896	53.8139	55.2414	51.2116
Hdac4	7.3594	7.42955	9.7821	9.12279	7.23844	7.00571	8.88428	8.03223	8.04214	8.29519	8.37025	10.0471	7.17113	9.03084	9.30786
Gm11681	2.42451	4.76521	2.20177	5.57841	3.78098	3.98437	5.21707	5.13059	4.38664	2.47768	6.40015	4.94135	4.53948	6.65365	3.02325
Hdac6	9.73732	8.93012	9.54646	9.09082	9.29153	8.82463	7.64317	9.33866	9.10994	9.96783	7.81813	8.46602	9.5525	10.3183	9.19926
Hdac9	9.7534	8.73252	9.8915	8.35644	7.69436	8.34059	8.71637	9.14464	9.74303	8.68703	7.14717	7.40445	8.05891	7.5716	9.50893
Hdac8	4.64536	5.19547	5.53952	6.86632	5.3281	5.29807	3.69935	4.74174	5.55887	5.82294	5.78999	5.17053	6.40834	5.60204	5.53804
Gmpr	31.6909	27.3638	29.9303	26.4984	36.4335	26.7882	31.5202	27.4469	34.3114	25.9505	32.2811	35.119	34.1286	30.8873	31.2057
Gmps	10.6003	8.90498	9.76843	9.20854	9.14508	9.87931	10.7409	9.76801	9.93805	10.3269	8.76793	8.74323	8.72289	7.22749	10.3327
1110032F04Rik	3.95179	3.25157	3.64918	3.82113	3.83168	3.79725	3.77862	3.5416	4.29248	4.10789	3.01183	3.71439	4.08273	3.82281	3.57184
AK018523	0.0195359	0.0627386	1.95E-55	0.0291958	0.111431	0.17877	0.0231518	0.0249346	1.25E-162	0.0805815	1.07E-121	0.0785826	0.0577492	0.215172	0.108552
4930557J02Rik	0	0	0	0	0	0	0	0	0	0	0	0.0418482	0	0	0
Pvr	2.17655	2.38337	2.44996	2.41019	2.32059	2.35582	2.65114	2.7455	2.60952	2.42799	2.91644	2.13428	2.13522	2.43154	2.50877
DQ552563	0	0	0	0	0	0	0	0	0	0	0	0	0	0	0
4732471J01Rik	0.96666	1.05928	1.1542	1.01841	1.08585	1.00602	0.564129	1.01423	0.919563	1.16423	0.884234	0.829203	1.09867	0.993732	0.971608
Lix1l	11.1706	10.9689	10.5264	11.2129	10.786	11.0272	12.1302	11.7029	12.7039	11.2466	11.3773	10.7876	12.0815	11.747	10.9345
DQ552568	0	0	0	0	0	0	0	0	0	0	0	0	0	0	0
Ikzf5	6.47518	6.69382	6.56712	6.74078	6.50252	6.09744	7.13417	6.35296	6.36456	6.51829	6.34336	6.66773	6.20908	6.63666	6.52068
Ikzf4	2.75248	2.39035	2.79812	2.49146	2.40356	2.46807	3.00284	2.39185	2.78758	2.46036	2.37318	2.11723	2.85517	2.42884	2.82949
Ikzf1	1.00574	0.97191	0.790506	1.18038	1.20953	1.34229	1.25741	1.2773	1.09458	0.733973	2.12902	1.10222	2.60172	1.14792	0.974377
Ikzf3	0	0.0193521	0.00837499	0.0202976	0.0307933	0.048792	0.0187555	0	0.0086231	0.00813849	0.125334	0.0270951	0.96993	0.0358419	0.0329805
Ikzf2	0.455604	0.481064	0.590892	0.626	0.531053	0.494255	0.399151	0.531247	0.586001	0.595535	0.727944	0.473162	0.576945	0.493475	0.473753
H2afv	16.6431	14.9983	14.8485	18.2707	17.7802	15.0965	15.8089	15.959	14.3047	15.0488	16.1775	17.1921	17.3332	15.7894	14.2333
Mbtd1	3.19691	3.27611	3.51555	3.45046	3.89716	3.90953	2.69147	3.76763	3.93876	3.84039	3.52858	3.32857	3.29887	3.62426	3.68734
H2afx	18.4962	15.7562	16.4752	16.2403	15.5958	15.449	17.1264	17.3153	17.4212	17.3799	14.7351	15.9834	17.0326	18.7058	16.0382
H2afy	39.7552	36.5879	33.9059	36.5847	36.2547	36.4614	36.9572	38.4516	34.4537	36.6342	33.0356	35.2975	38.2328	37.5071	36.2773
H2afz	43.7555	41.8325	39.7563	45.6715	40.4325	38.5642	38.6087	41.3528	41.8691	39.8427	40.3228	45.4569	46.7137	51.3034	40.143
AK040058	8.27E-09	9.99E-08	4.79E-08	0.0427044	0.0533207	4.75E-07	1.08E-07	2.33E-07	6.71E-08	4.54E-08	8.66E-08	2.60E-07	1.15E-07	6.30E-08	1.99E-08
Ncam1	151.164	146.056	159.777	133.735	142.247	149.05	140.609	131.782	142.503	150.18	131.719	131.721	147.041	108.648	148.033
H2afj	12.8082	14.7312	13.3686	14.7172	13.7472	13.0917	10.9476	13.9204	12.9635	14.8766	11.9022	12.5613	14.021	14.1466	11.6626
Theg	0.264999	0.0387202	0.0335124	0.0270726	0.0821537	0.07809	0.126029	0.0941315	0.241583	0.130277	0.0668745	0.108433	0.287637	0.0358559	0.197982
Fgf18	0.829716	0.790875	1.36901	1.00723	0.689139	0.911377	0.70477	1.13293	0.98174	1.25908	1.34146	1.21276	0.786753	0.836995	1.22795
Fgf13	88.5055	71.2211	76.3712	72.8861	82.5974	73.7105	92.8993	77.0746	77.6596	81.5306	79.0781	72.4375	78.3786	87.5185	73.37
Fgf12	24.1273	22.3837	22.3036	23.4052	20.1538	20.7886	22.0752	22.0312	22.4012	21.4509	17.3042	20.505	21.977	19.7644	23.7804
Fgf11	9.40282	10.0764	10.1643	9.52054	9.09949	9.78177	8.63593	9.64734	10.8394	11.128	8.38935	9.61232	9.72278	10.8545	11.2172
Fgf10	3.69442	3.63172	3.91352	3.64915	4.04466	3.86373	3.61234	3.71343	3.53262	3.68692	3.97985	3.53006	2.74881	3.82798	3.33861
Fgf17	0.0507966	0.0259745	0.0449721	0.0181616	0.0275535	0.0523931	0.0281785	0.0315707	0.0231487	0.0874142	0.0897467	0.0242444	0.0723711	0.048116	0.0442756
Fgf16	0.207819	0.14615	0.264485	0.157929	0.197317	0.294732	0.172965	0.14534	0.153932	0.212318	0.309766	0.136415	0.222047	0.258373	0.158498
Fgf15	0.0229793	0.0235059	0	0	0	0	0	0	0	0	0	0.0219403	0.0218245	0.0435341	0.0200293
Fgf14	11.1882	9.2041	10.4425	8.96068	10.2237	9.66615	9.16044	9.14181	8.86213	10.2754	8.25219	7.66294	7.94731	7.93631	9.13244
Dpcr1	0	0	0	0	0.00207834	0	0.00283398	0.00762036	0.0139688	0.00131827	0.00193349	0.00162555	0.0145527	0.00120954	0
AK134652	0.117141	0.196641	0.154024	0.188582	0.1699	0.135577	0.130852	0.173041	0.108284	0.196478	0.204436	0.123657	0.134187	0.145264	0.0701149
DQ717880	0	0	0	0	0	0	0	0	0	0	0	0	0	0	0
AK157890	4.02E-53	0.106241	0.048322	0.0769426	0.0580206	0.161168	0.0599682	0.0642655	1.72E-58	2.92E-28	0.139419	5.34E-23	5.04E-51	0.0981245	0.044753
DQ717888	0.649834	1.10193	0.892216	1.37393	0.902275	0.942412	0.664643	0.553999	1.0318	1.0734	0.912002	0.943061	1.14526	1.24106	0.798882
Prss46	0	0	0	0.0250202	0	0	0.0404627	0	0	0	0	0	0.0346299	0.0690858	0.0317808
Prss44	0	0	0	0	0	0	0	0	0	0	0	0	0	0	0
Prss45	0.18398	0.0752704	0.0651466	0.131589	0.0798462	0.0379411	0.0408209	0.0914876	0.167723	0	0	0.0351218	0.349483	0.0697023	0.192437
Prss42	0	0	0	0	0	0	0	0	0	0	0	0	0	0	0
Lvrn	0	0.0124975	0	0.0174768	0	0	0.0406741	0	0	0.0105112	0	0.0116651	0	0.011573	0
Prss40	0.0259772	5.48E-08	0	0	5.57E-06	0	0	0.0645954	0	0.0446904	0	0	0	0.0246069	0
Prss41	0	0.1241	0.0856557	0.0518968	0.0787339	0.0249464	0.0268399	0.030071	0.110246	0.0832335	0.142633	0	0.0768434	0.0613193	0.0210814
DQ710350	0	0	0	0	0	0	0	0	0	0	0	0	0	0	0
DQ710353	0	0	0	0	0	0	0	0	0	0	0	0	0	0	0
Prss48	0	0	0	0	0	0	0	0	0.0450745	0	0	0	0	0	0
Phc1	11.6764	12.0389	12.0786	11.9938	11.5636	12.0709	11.1983	11.824	11.7263	12.0436	10.986	11.4427	12.8382	11.4053	12.1331
Phc3	6.27903	7.30071	7.62326	6.51734	6.21304	7.17304	6.54389	7.29257	7.22995	6.797	7.10736	6.16195	5.84271	5.26262	7.28374
Phc2	26.5487	25.771	26.6179	28.2242	25.948	24.383	26.2482	28.8566	28.7862	26.2904	26.8289	28.5957	30.8119	31.3877	27.4482
DQ554814	0	0	0	0	0	0	0	0	0	0	0	0	0	0	0
DQ554812	0	0	0	0	0	0	0	0	0	0	0	0	0	0	0
Golt1b	11.7954	10.8883	10.38	12.4718	11.1492	10.1727	11.5441	10.9018	11.2843	11.3462	10.9586	10.7329	10.8113	12.0213	11.0987
Golt1a	0.0303055	0.103863	0.0418611	0.0716624	0.0507007	0.0463912	0.110678	0.0559211	0.154607	0.0865813	0.0599196	4.22E-183	0.215161	2.39E-07	0.0196013
Med25	27.7867	25.15	24.3846	27.1887	25.267	24.1145	25.3506	26.1356	23.6087	25.4822	24.0856	26.8486	27.7478	26.3155	24.3533
4930544M13Rik	0	0	0	0	0	0	0	0	0	0	0	0	0	0	0
Grin1os	0.530041	1.35812	1.84312	1.17882	1.20747	1.29487	0.326594	1.15478	1.09188	0.851443	1.14563	0.53299	0.462227	1.7639	1.44736
Chmp3	33.6871	32.6917	30.439	34.5712	33.4112	32.872	33.0914	30.9298	30.1434	32.4049	34.1704	37.1025	35.5168	33.6328	33.736
AK040321	0.0803493	0.147069	0.0992655	0.0799728	0.138335	0.0165249	0.0355947	0.0797394	0.174987	0.178803	0.125913	0.060872	0.0304276	0.151012	0.097731
Chmp7	31.0057	29.7435	29.7706	30.0212	31.7114	29.6113	28.7056	30.6238	29.9839	28.9553	28.2844	32.3871	32.2581	32.0059	30.0667
Chmp6	12.5626	10.3515	11.38	10.725	11.3867	12.3469	12.2986	11.1119	9.53302	13.2278	11.8455	12.8986	12.8043	13.5137	11.2981
Chmp5	52.4406	53.859	50.6971	60.5592	56.0789	53.1761	48.3467	51.776	51.4525	53.2056	54.8181	57.1643	58.5968	58.2203	50.4874
Nupl1	18.878	19.0918	20.6088	19.976	18.9656	18.7539	21.9992	26.5765	21.077	23.9165	16.6442	20.6298	21.7756	15.4048	20.6146
Recql5	3.62152	4.98232	4.69757	5.13441	4.70999	4.29405	2.26729	4.00326	4.36332	4.65417	4.5715	3.42603	4.35957	4.72281	4.15403
Mir6941	0	0	0	0	0	0	0	0	0	0	0	0	0	0	0
Mir6942	0	0	0	0	0	0	0	465.233	0	0	0	0	0	0	0
Mir6943	0	0	0	0	0	0	0	0	0	0	0	0	0	0	0
Mir6944	0	0	0	0	0	0	27.0101	30.2617	0	0	0	0	0	0	0
Mir6945	0	0	0	1.15E-32	5.83E-124	0	0	0	0	0	0	0	2.96E-168	4.43E-293	0
Fam170a	0	0	0	0	0	0	0	0	0	0	0	0	0	0	0
Gcnt2	6.26343	5.84718	5.8693	5.83663	5.38632	5.86689	6.62567	5.73142	6.0916	5.42483	5.90044	5.64121	6.05322	5.80099	5.01704
Mir6948	0	0	0	0	0	0	0	0	0	0	0	0	0	0	0
Mir6949	0	0	0	0	0	0	0	0	0	0	0	0	0	0	0
Mark4	26.6492	27.6457	26.0175	23.9105	25.8028	25.3665	29.9177	24.919	29.907	27.3372	23.8942	24.5536	24.5243	23.7374	26.2795
AK137356	1.46414	1.79287	2.17265	1.17829	1.68812	1.71188	1.49447	1.6539	2.35372	1.77111	1.22508	1.15003	0.995774	0.46276	1.65505
Mark1	14.4424	11.4872	13.2758	11.844	11.9014	12.0794	11.8733	11.8618	12.2047	13.5697	11.5718	12.3229	12.6129	12.3734	13.7013
Mark2	21.9293	19.9981	19.858	20.1413	21.0956	19.3028	23.5741	21.8343	20.6044	20.7161	19.731	19.9342	21.9735	22.8457	22.0629
Mark3	19.0268	19.1357	21.0794	20.2238	19.8317	20.2346	17.3853	19.5426	21.3411	21.0169	19.8645	21.1016	21.5599	23.6744	22.0655
DQ693297	0	0	0	0	0	0	0	0	0	0	0	0	0	0	0
4930565D16Rik	0	0	0	0	0	0	0	0	0	0	0	0	0	0	0
AK086757	2.56466	3.23637	3.07347	3.28283	3.18332	4.02915	3.16157	3.64238	3.80402	3.24399	3.91934	4.09026	3.61594	3.13856	2.95707
Nmd3	9.7012	8.74837	9.5428	9.70649	10.2025	9.48032	8.4336	9.73796	9.15045	10.1596	9.34825	9.08686	10.4908	10.3691	9.94059
Rps15a-ps6	17.7433	18.2138	15.5992	20.2983	17.8533	17.6534	22.9536	17.2012	17.8184	16.4851	19.2874	20.0231	22.4792	19.7957	16.8171
Extl1	16.8868	18.6764	17.8151	17.5618	17.4821	16.8127	18.8518	17.9466	16.2926	16.64	16.7512	19.1773	17.6397	16.0989	18.1722
Extl2	31.8574	29.8256	29.9965	30.4279	31.0966	28.1585	30.9809	29.8111	30.1611	28.803	28.8046	30.1787	29.9801	30.8244	30.272
Extl3	26.2713	24.4915	24.1062	22.3857	23.4121	25.1953	25.2174	23.51	25.4911	23.7767	22.7544	24.9677	23.3515	22.2325	24.2222
Gm7609	0.0511167	0.0515116	0.0304684	0.125973	0.0324005	0.12137	0.0303273	0.0761391	0.0959697	0.0243829	0.304278	0.0480804	0.451523	0.0297226	0.063083
Tia1	7.81636	12.6674	12.814	13.5477	12.2697	11.729	5.36966	13.265	11.582	13.0299	12.7215	7.42985	11.0004	12.3732	12.9031
Tmem160	27.0085	25.2224	20.8159	27.4669	25.0549	23.8155	26.1584	21.4372	26.6005	21.4729	25.9865	31.7161	31.148	27.0114	22.5429
Tmem163	4.18842	2.13406	2.72119	2.14141	2.3502	2.16824	2.41234	2.07904	2.09063	3.69936	1.88496	2.02233	3.34268	2.27789	2.04052
Tmem165	9.12186	9.64269	9.34802	10.0433	9.52019	9.83519	9.15631	10.2586	11.3524	11.0882	9.42258	9.042	10.8965	11.4865	9.60174
Tmem164	3.53183	2.58737	3.69524	2.94711	2.44721	3.13039	3.40054	3.38409	3.2925	2.83287	2.54893	2.57775	3.68826	2.00217	2.95768
Tmem167	4.49639	4.38448	4.63737	4.67178	4.53041	4.26422	4.13401	4.609	4.24632	4.80525	4.21707	4.17121	4.15497	4.25097	4.368
Tmem169	3.89973	3.69441	4.65659	3.40724	3.98023	4.11091	3.13737	4.09433	3.72559	4.78827	3.48344	3.52916	3.56413	3.97365	4.49944
Tmem168	3.40423	3.67857	3.85305	3.5875	3.59827	3.58597	3.64122	3.46864	3.89186	4.14394	3.93274	3.785	3.9519	4.14976	3.40479
DQ560645	0	0	0	0	0	0	0	0	0	0	0	0	0	0	0
AK076892	0	0	0	0	0	0	0	0	0	0	0	0	0	0	0.32154
Mtus2	7.96824	9.41929	9.59987	8.11815	8.41129	9.23977	7.79059	7.88568	7.9011	8.29611	8.11036	8.99675	8.04508	8.80958	9.48137
Tbc1d8	2.1668	2.34939	2.58339	2.40394	2.38893	2.49591	2.09548	2.33742	2.55147	2.85364	2.13215	2.23549	2.83336	2.34794	2.44855
Tbc1d9	19.5014	22.0493	23.8267	17.2393	17.0475	19.9408	17.985	18.6473	20.8877	25.2391	21.0815	19.1151	18.2478	18.6073	18.3535
Tbc1d1	4.83801	5.73593	5.96673	5.79215	6.00598	6.07911	5.32137	6.26382	6.73963	5.88077	6.29133	5.98125	5.90345	6.09308	6.65349
Tbc1d2	0.476056	0.882052	0.978128	0.687406	0.760234	0.954241	0.348869	0.737063	1.03175	0.989145	0.967935	0.780421	0.690995	0.765752	0.626328
Tbc1d4	2.47146	1.78109	2.73034	2.34629	2.71877	2.35938	1.85501	1.85593	2.56502	2.01198	3.49967	2.8971	2.25786	2.23458	1.68239
Tbc1d5	8.04088	8.66807	8.50178	8.16478	8.61079	8.62542	8.30428	7.19251	8.22858	7.86715	8.07883	8.72988	7.62763	7.24906	7.91727
Tbc1d7	8.01378	7.46244	7.8462	8.32532	7.94588	7.00168	8.16002	7.24241	7.77325	7.12448	7.67669	7.74298	8.9496	7.86749	8.02902
Spata45	0.164434	0.841013	0.14558	0.117609	0.178428	0	0	0.817769	0.599616	0	0.145243	0.156999	0.312342	0.778799	0.28665
DQ710826	0	0	0	0	0	0	0	0	0	0	0	0	0	0	0
Tex13a	0	0	0	0	0	0	0	0	0	0	0	0	0	0	0
Mir3070a	0	0	0	0	0	0	0	0	0	29.991	0	33.2835	0	0	0
Mir3070b	34.8597	0	0	49.8656	0	0	0	0	0	29.991	0	0	33.1079	0	0
4933405E24Rik	0	0	0	0	0	0	0	0	0	0	0	0	0	0	0
DQ714309	0	0	0	0	0	0	0	0	0	0	0	0	0	0	0
AK194005	3.82831	7.27267	6.4559	6.2586	8.11042	7.33318	7.08057	9.2929	6.64768	7.99883	8.37329	6.26609	7.44501	7.42541	6.51482
AK047355	0	0	0	0	0	0	0	0	0	0	0	0	0	0.00937473	0.00862631
DQ712460	0	0	0	0	0	0	0	0	0	0	0	0	0	0	0
Akirin2	35.5149	29.7741	31.5175	31.8721	30.9832	30.6228	33.4739	28.946	32.674	32.5772	33.2159	31.0067	32.6387	33.7203	31.0083
Akirin1	17.0503	16.5234	16.0514	18.2504	18.3722	16.2575	17.8296	17.5285	18.4971	18.339	17.1009	16.8342	18.9164	19.4345	17.2493
Rab3il1	4.20189	4.35904	4.19277	5.05468	4.80248	5.70356	5.43509	4.97262	4.37037	3.68515	5.97004	5.93928	6.73554	4.8428	3.72789
Ap3m1	8.49321	9.10752	8.18397	8.88406	8.36356	8.58908	7.60398	8.58449	8.52257	8.94415	8.14194	7.98418	9.38456	9.22757	8.92457
Crhbp	16.1858	21.0722	19.2461	18.6403	19.5658	20.5405	17.2053	22.1394	24.3273	19.624	17.8127	21.2402	20.8578	25.3249	23.7948
Limd2	25.6494	21.7228	24.3979	23.9874	25.5029	22.797	22.7353	22.2592	23.7308	25.1463	25.6678	25.52	27.1637	28.8216	23.1937
DQ545902	0	0	0	0	0	0	0	0	0	0	0	0	0	0	0
1700046C09Rik	0	0	0.0910926	0	0	0	0	0	0	0	0	0	0	0	0
Nop58	11.0798	10.9085	11.7602	10.3036	11.1882	11.0207	10.1732	11.5271	11.4842	11.0883	10.6314	10.7575	11.0759	11.8147	11.0345
Acsf2	6.28717	5.24759	4.81499	7.04406	5.87354	5.67583	6.82003	6.15441	5.64957	4.97768	5.43984	6.27297	7.09465	5.80936	5.2111
Nop56	26.067	29.4581	28.3409	30.8527	26.8407	26.9594	23.5219	28.7899	28.4053	28.2635	28.7235	25.5869	29.351	34.2222	30.9067
Gga2	6.01977	7.20226	7.32959	6.37715	6.57902	6.23354	5.76369	7.89258	7.61425	7.06904	7.18213	5.98354	6.89311	7.42338	6.16154
Sarnp	12.6025	12.0936	11.4194	11.318	11.6844	11.509	11.0963	10.1957	10.641	11.9225	10.7556	11.0236	12.9595	15.2163	11.0972
Kcnip4	20.1125	22.3922	20.9722	22.4992	21.7759	20.6209	20.3892	21.8485	24.2975	22.7647	22.31	22.69	22.6528	23.7498	24.2864
Kcnip3	26.6941	34.4659	27.3708	31.1984	30.4252	31.5842	29.3936	32.2003	31.7656	28.5449	26.9105	39.0607	35.2732	29.4172	36.468
Kcnip2	74.4102	63.0325	68.596	62.435	81.0131	67.1317	62.0817	67.4644	61.835	70.082	75.3213	69.3658	65.7894	80.7263	62.0357
Kcnip1	6.7083	6.32197	5.95904	6.8464	5.86591	6.27774	5.5785	6.25207	6.15427	7.17923	6.59722	6.10162	6.76975	7.08172	6.64759
4930553E22Rik	0	0	0	0	0	0	0	0	0	0	0	0	0.104429	0	0
4930447A16Rik	0	0	0.0851468	0	0	0.099197	0	0	0	0	0	0	0	0	0
Tpcn1	10.965	10.3619	10.6445	11.6629	10.2107	12.2568	10.3242	10.6993	12.0327	12.45	10.5528	11.179	10.8266	9.57339	10.2818
DQ547508	0	0	0	0	0	0	0	0	0	0	0	0	0	0	0
Caly	158.766	133.925	141.425	141.483	146.955	139.277	152.214	138.589	131.364	138.016	128.475	143.145	145.769	170.397	134.621
DQ547505	0	0	0	0	0	0	0	0	0	0	0	0	0	0	0
Scnn1g	0.0659196	0.0944025	0.0700333	0.066007	0.0858355	0.0543931	0	0.163917	0.0480758	0.056713	0.0931621	0.0881147	0.0375642	0.0499538	0.195355
Ltbp4	12.5402	10.8244	10.9063	11.1721	13.3743	14.7938	12.7852	12.5177	14.5649	12.0709	11.0894	13.2739	12.5982	12.6791	10.8166
Ltbp3	3.86363	5.36842	4.84016	5.6889	4.06651	4.84734	3.56106	4.53545	5.90759	6.10288	5.44292	5.1126	5.25424	4.55249	3.82366
Ltbp2	0.0407205	0.033323	0.0381907	0.0584861	0.138443	0.214164	0.0271129	0.0599709	0.0710888	0.0346859	0.147117	0.0623501	0.211829	0.0385724	0.00210621
Tcl1	0	0	0	0	0	0	0	0	0	0.0311278	0	0	0	0	0
DQ692659	0	0	0	0	0	0	0	0	0	0	0	0	0	0	0
DQ692658	0	0	0	0	0	0	0	0	0	0	0	0	0	0	0
AK080343	0	0	0	0	0	0	0	0	0	0	0	0	0.087899	0	0
AK180973	0	0	0	0	0	0	0	0	0	0	0	0	0	0.0110947	0
AK149132	0.188104	0.228296	0.226484	0.0992323	0.269127	0.250719	0.15606	0.14007	0.27108	0.120322	0.11873	0.229616	0.282381	0.133162	0.168642
DQ685458	0	0	0	0	0	0	0	0	0	0	0	0	0	0	0
Chadl	4.1157	3.18224	2.98588	3.11521	3.24737	3.21412	3.67268	3.11887	3.81857	3.81667	2.64416	3.76441	4.12913	3.66559	3.29596
3300002P13Rik	45.4636	47.9483	48.0731	32.7545	54.4191	54.2088	48.7946	44.0444	49.5768	52.0687	59.3938	56.1215	41.6031	64.4409	53.7644
9530082P21Rik	0.52643	0.473189	0.744117	0.701328	0.709389	0.794546	0.540204	0.55775	0.506039	0.430707	0.902242	0.555323	0.796256	0.72602	0.461918
AK139001	0.337111	0.300994	0.326737	0.466607	0.325004	0.24264	0.132212	0.457701	0.296805	0.414839	0.340097	0.253548	0.362353	0.499807	0.384198
Gm1600	0.00859448	0	0.00760901	0.00614705	0.0093259	0	0	0.0320568	0.0470103	0.0221824	0.00759144	0	0.00816259	0	0
AK011526	0.132276	0.0678693	0.115672	0.0899173	0.0682082	0	0.209266	3.56E-08	0.0617005	0.0580625	0.1157	1.23E-08	4.46E-08	0.193007	0.164368
DQ550909	0	0	0	0	0	0	0	0	0	0	0	0	0	0	0
Cxx1a	79.3748	71.5834	63.676	71.2401	73.8327	69.0927	75.9209	67.6565	69.3928	66.5728	64.1517	77.8876	74.5966	79.575	69.1801
Secisbp2	3.70532	4.42779	4.3643	4.85061	4.05255	4.23778	2.97031	4.26864	4.06187	4.34396	3.86773	3.5683	4.45981	4.81519	4.09104
Cxx1c	174.177	158.629	127.716	149.193	149.584	140.447	163.372	138.076	137.043	129.65	125.347	158.983	162.258	153.983	149.21
Cxx1b	85.5257	76.0071	69.6228	75.6167	77.4848	72.7773	81.1444	73.1818	72.9814	71.9161	70.0634	82.8732	78.1083	84.7703	74.9784
Cacna1h	12.4077	12.2626	15.5644	12.114	13.5568	14.6286	14.1834	14.2712	15.3544	14.6933	13.8995	12.7204	13.3439	13.2333	15.0826
Cacna1i	8.56178	9.32968	9.8551	8.18687	8.85486	9.57964	10.9802	9.01166	9.72065	9.20503	8.52441	9.7657	7.67917	7.1896	10.0908
DQ725894	0	0	0	0	0	0	0	0	0	0	0	0	0	0	0
Murc	0.160156	0.266217	0.106344	0.20046	0.0868927	0.206486	0.244375	0.298684	0.109503	0.223905	0.265245	0.152914	0.285201	0.170671	0.31409
Calhm1	0	0	0	0	0	0.045069	0	0	0	0	0.0385961	0	0	0	0
Calhm2	2.45572	2.22608	1.94435	2.15624	2.33974	2.32697	2.10479	3.07804	2.32973	2.47346	2.25729	2.24937	2.69259	2.42074	2.3667
AK171187	2.71E-141	0.0309251	0.00140064	0.0270753	0.00186438	3.90E-184	0.0434418	0.0254071	0.0517517	0.0163524	0.0223185	0	0.0192192	0.0371477	0.0326909
Cacna1b	11.9992	11.9527	13.4163	8.43027	12.4341	13.444	10.8131	10.6075	12.9559	10.7905	12.5307	10.6805	10.8096	8.63932	13.3192
Cacna1c	8.20661	7.88913	9.7935	5.52982	8.46982	9.60695	8.8567	7.88389	7.84617	9.43564	8.67872	7.71071	6.00265	6.39027	8.2242
Cacna1d	4.15071	4.76925	5.5155	4.36994	4.49126	5.0467	3.93893	5.03437	5.01047	4.92455	4.66971	4.37635	4.38804	5.18424	5.43262
Cacna1e	20.0544	21.1283	27.9117	14.0789	19.7332	26.7697	21.5267	21.9406	22.2189	20.8012	23.734	18.5917	15.0603	11.7278	24.1402
Cacna1f	0.0316328	0.0158722	0.0560349	0.0559643	0.0336879	0.0815533	0	0.0192919	0.0427437	0.026721	0.0558818	0.030228	0.0300685	0.044946	0.0549273
Cacna1g	6.80807	7.73973	7.83359	6.48133	6.16529	6.88148	5.91832	7.61282	6.97631	7.07023	6.34088	6.42124	6.82631	8.1234	8.33789
DQ721398	0	0	0	0	0	0	0	0	0	0	0	0	0	0	0
DQ699121	0	0	0	0	0	0	0	0	0	0	0	0	0	0	0
Impad1	20.7009	18.6406	20.8732	19.3231	17.5722	18.5927	20.1611	18.561	20.2969	21.2439	16.9554	15.9075	16.7946	15.4352	18.9094
Cacna1s	0.0553958	0.0503686	0.0544938	0.0704405	0.0601101	0.133327	0.0409868	0.0841811	0.0392773	0.063547	0.146803	0.0470137	0.150423	0.0923245	0.0375534
DQ697717	0	0	0	0	0	0	0	0	0	0	0	0	0	0	0
DQ691358	0	0	0	0	0	0	0	0	0	0	0	0	0	0	0
Olfr1414	0.0167042	0	0	0	0	0	0	0	0	0	0.0221324	0	0	0.0118083	0
Xrn1	3.82741	4.01721	3.94737	3.22633	3.81733	4.31296	4.07524	3.87568	3.82579	4.1821	4.22983	3.23197	3.5096	3.27251	3.6142
Xrn2	12.2759	12.1995	12.5825	12.1852	12.8816	11.5778	9.82507	12.8932	11.4313	12.838	11.8332	11.0825	12.1819	11.5328	12.4521
Pde11a	2.68887	2.53671	3.94701	1.97304	2.63045	3.28987	2.73673	2.75415	2.81878	3.05649	1.99357	2.18152	2.46773	2.12471	3.03585
Gm17689	0	0	0	0	0	0	0	0	0	0	0	0	0	0	0
DQ722351	0	0	0	0	0	0	0	0	0	0	0	0	0	0	0
Nubpl	2.08573	1.75255	1.77548	1.83384	1.84553	1.49822	1.94259	2.26906	1.8957	1.98669	1.57913	1.70039	1.80405	2.08155	1.58546
Dqx1	0.00696081	0.296793	0.215688	0.213632	0.0989981	0.129188	0.0804859	0.292385	0.314697	0.121283	0.239783	0.232689	0.191084	0.243987	0.230421
Dynlrb1	170.395	142.586	142.224	154.588	152.645	145.148	172.486	152.639	146.087	144.039	151.266	165.335	163.528	171.887	146.612
Mir7228	0	0	0	0	0	0	0	0	0	0	0	0	0	0	0
Mir7229	0	0	0	0	0	0	0	0	0	0	0	0	0	0	0
DQ566942	0	0	0	0	0	0	0	0	0	0	0	0	0	0	0
Mir7222	0	0	0	0	0	0	0	0	0	0	0	0	0	0	0
Mir7223	0	0	0	0	0	0	0	0	0	0	0	0	0	0	0
Mir7220	435.217	0	0	0	0	448.895	0	541.109	0	0	0	0	0	0	0
Mir7221	0	0	0	0	0	0	0	0	0	0	0	0	0	0	0
Mir7226	0	0	0	0	0	0	0	0	0	0	0	0	0	0	0
Mir7227	0	0	0	0	0	0	0	0	0	0	0	0	0	0	0
Mir7224	0	0	0	0	0	0	0	0	0	0	0	0	0	0	0
Mir7225	0	0	0	0	0	0	6.92E-191	0	5.63E-234	5.87E-261	2.04E-201	0	0	0	0
mFLJ00251	0.0995738	0.242294	0.256399	0.161643	0.166549	0.136766	0.111644	0.278373	0.0969333	0.200296	0.339128	0.0932065	8.83E-07	0.0920848	0.190034
Gdpd5	4.94764	4.68294	5.34515	4.70221	3.79717	4.69927	4.1024	4.65088	4.87566	4.24142	3.58932	4.4933	4.48205	4.06864	4.66165
Mir1298	0	0	0	0	0	0	0	0	0	0	0	0	0	0	0
AK145303	0	0	0	0	0.049346	0	0	0	0.0414575	0.0782491	0	0	0	0.0430769	0
1600015I10Rik	0	0	0	0	0	0	0	0	0	0	0	0	0.0153442	0	0
AK207733	0	0	11.4176	0	17.4367	0	0	0	0	15.0954	11.1587	8.79514	8.74874	0	3.21164
DQ694721	0	0	0	0	0	0	0	0	0	0	0	0	0	0	0
Cnot8	20.0704	18.9588	19.7753	20.958	19.0023	18.8204	19.0267	20.3342	18.8271	20.378	18.3499	21.5597	22.3179	23.3634	19.7202
Gm10486	0	0	0	0	0	0	0	0	0	0	0	0	0	0	0
Cnot3	10.0619	9.61501	10.5753	10.4323	9.96871	10.0286	9.08363	9.73526	11.2943	10.6057	9.39756	10.0778	10.8025	10.4067	11.5258
Cnot2	17.1127	16.6023	17.3247	16.3783	17.3383	17.3627	15.5801	16.7796	18.0337	18.1143	17.3783	17.0693	17.4288	17.5821	18.7398
Cnot1	14.2748	14.4676	17.6624	13.8559	13.4306	14.679	15.5256	15.4558	15.7112	16.7967	14.2394	13.0366	13.6472	13.1472	17.0329
DQ694728	0	0	0	0	0	0	0	0	0	0	0	0	0	0	0
Cnot7	31.4166	29.3357	31.4133	31.4705	31.7593	31.057	27.6123	33.1046	30.5631	33.608	30.8603	28.6565	32.0577	32.9837	31.3776
Cnot6	10.9195	9.88848	10.7681	10.9967	9.49377	9.78872	9.76996	10.1235	10.593	11.1789	11.0662	9.94916	10.9717	11.0577	10.6207
Cnot4	8.60096	8.35281	8.80264	8.98224	8.32419	8.07473	9.15406	9.88527	9.65256	9.20653	8.44675	7.7432	8.07187	8.09595	9.54325
Mir3107	0	0	0	0	0	0	0	0	0	0	0.0216325	0	0	0	0
Mir3106	0	0	0	0	0	0	0	0	0	0	0	0	0	0	0
AK008572	0	0	0.12237	0	0	0	0	0.085924	0	0	0.0610436	0	0	0	0
D830046C22Rik	0.0171091	0.0350024	0	0	0.0371302	0	0	0.0212719	0.062389	0.0147195	0	0	0	0.0162065	0.0149127
Mir3103	0	0	0	0	0	0	0	0	0	0	157.537	0	0	0	0
Mir3102	0	0	0	0	0	17.5023	0	0	15.4696	0	0	0	0	16.0739	14.7906
AK206280	1.00E-05	0.000617297	0.968707	2.08242	2.01826	7.95247	0.000363626	1.13383	4.7196	2.69038	5.33082	2.62252	2.89323	3.98568	2.94E-06
Ccdc3	6.6947	6.04969	5.34233	6.74223	7.5902	5.9452	5.61356	6.28934	7.43506	5.46267	8.36623	6.93661	6.03038	6.17803	5.05026
Oscar	0.204244	0.441088	0.522418	0.438276	0.369392	0.257503	0.100722	0.479685	0.268977	0.370981	0.300691	0.346699	0.19398	0.429957	0.316502
DQ720447	0	0	0	0	0	0	0	0	0	0	0	0	0	0	0
AK138064	0.0434948	0.104261	0.0152247	0.0277924	0.0733028	0.0440466	0.0261953	0.0338773	0.0715761	0.0415295	0.0499234	0.0433904	0.0384074	0.0808135	0.057579
Mir3108	0	0	0	0	0	0	0	0	0	0	0	0	0	0	0
Sirpb1a	0	0	0.0133848	0.0162171	0.0591426	0	0.0251672	0	0.0413525	0	0.0667218	0.0144347	0.33776	0.0766915	0
Sirpb1b	0	0	0.0421327	0.138118	0.0226496	0.0294066	0	0.0354475	0.0606878	0	0.24165	0.0141245	0.569035	0.0687488	0
B930018H19Rik	0.211369	0.0786229	0.0340241	0.0274869	0.0417012	0.0396385	0.0426471	0.215015	0.0875871	0.115722	0.0509183	0.0550396	0.0729989	0.127412	0.11724
Nfic	13.2041	14.542	13.1909	13.9758	14.1208	13.8814	13.9298	13.8619	13.8839	13.766	13.9888	13.7106	13.9264	11.1517	13.527
Nfib	21.8154	20.035	24.1607	17.8596	21.3954	22.106	22.5051	20.5893	22.2096	23.9714	24.3532	21.9201	20.2763	21.8597	22.2718
Nfia	7.28502	6.89232	6.72238	6.51625	6.81859	6.53593	7.19301	6.5144	6.79088	7.70841	8.08517	7.13612	6.95864	6.67546	7.09575
Mir877	0	0	0	0	0	0	0	0	0	0	0	0	0	0	0
Mir876	0	0	0	0	0	0	0	0	0	0	0	0	0	0	0
Mir875	0	0	0	0	0	0	0	0	0	0	0	0	65.7168	0	0
Mir874	0	0	0	0	0	0	0	0	0	137.922	0	0	0	0	0
Mir879	0	0	0	0	0	0	0	0	0	0	0	0	0	0	0
DQ694892	0	0	0	0	0	0	0	0	0	0	0	0	0	0	0
Cxcr3	0.0786528	0.107274	0.0464228	0.11251	0.0284488	0.216333	0.0290941	0	0.215108	0.0225559	0.62526	0.0750965	0.697203	0.124173	0.0914077
Cxcr2	0.0184117	0.0098907	0.0157153	0.015438	0.00719008	0.0141692	0.0467104	0.0190122	0.0102564	0.00833639	0.0287466	0.0136019	0.00574092	0.0118302	0.00690157
Cxcr1	0	0	0.0382722	0	0	0	0	0	0	0	0	0	0	0.0409485	0
Ttyh1	152.749	130.231	126.314	148.913	126.574	125.013	150.941	133.375	129.615	121.512	130.254	133.191	148.371	139.888	126.202
Ttyh2	11.1912	15.7348	11.9688	14.8672	15.7572	13.459	13.5378	13.2241	11.741	13.2096	13.7179	12.3994	13.7928	13.9485	11.7785
Cxcr4	1.5444	1.39115	1.38772	1.56623	1.75085	1.59293	1.91848	1.26099	1.29319	1.66582	2.15823	1.23247	4.15038	1.9433	1.2457
Cyp2j11	0	0.0108902	0.0157091	0	0.0231044	0.0219615	0	0	0	0	0	0	0	0	0
Cyp2j12	1.14873	2.44908	1.36142	2.42244	2.18003	2.28826	1.2442	1.48111	1.53271	1.74833	2.33096	2.05178	1.71284	1.83616	1.36409
Cyp2j13	0.0196476	0.0251232	0.0217441	0.0210801	0.028756	0.018576	0.0327068	0.0427523	0.0268688	0.0253568	0.0130152	0.027376	0.0326579	0.00465019	0.0171253
Fbxl20	6.34812	7.06365	7.17388	6.40003	6.89161	7.13757	6.16978	6.99767	7.30962	6.84072	6.6234	6.41244	6.24104	6.32219	6.69094
Fbxl21	2.47085	2.21475	2.0212	2.50963	2.59557	1.79924	1.73458	1.50129	2.16368	1.74392	2.04683	1.89019	1.7343	1.66634	1.97167
Fbxl22	0.107289	0.163642	0.130736	0.109377	0.0817324	0.174099	0.129965	0.159525	0.243829	0.19179	0.0665987	0.199816	0.157687	0.0764944	0.0650803
AB349069	0	0	0	0	0	0	0	0	0	0	0	0	0	0	0
AK016731	0.06351	0.0216552	0.0749703	0.0757074	0.0689149	0.174683	0.070478	0.0263208	0.0771974	0.0182133	0.130895	0.0606384	0.0804246	0.0802129	0
5930412G12Rik	1.99287	0.691072	1.58338	2.45389	0.908454	1.02901	0.765993	0.419723	0.736232	0.841814	1.45063	1.57097	2.98989	2.39356	1.0484
AK205396	18.9407	17.1024	15.9926	19.777	19.1571	15.8579	20.1755	19.0428	18.4395	17.1001	19.4153	20.0937	19.0438	22.8699	17.5283
AB352792	0	0	0	0	0	0	0	0	0	0	0	0	0	0	0
Dlc1	12.6386	12.3039	12.6147	11.5369	11.835	12.4496	13.756	12.0892	11.9333	12.873	11.0532	11.8246	11.6958	11.1392	12.5742
AK040143	0	0	0.00937266	0.00471137	0	0	0	0	0	0	0	0	0	0	0.0344494
DQ540907	0	0	0	0	0	0	0	0	0	0	0	0	0	0	0
Pkig	44.2383	36.6083	35.8399	41.2423	38.4046	39.4011	43.8274	38.5024	38.299	35.739	39.8302	40.9388	43.453	43.3591	38.2103
Pkia	55.5292	41.5803	47.6337	50.4957	43.2921	40.2221	48.5757	45.1005	42.8693	51.3548	40.6196	42.5928	47.2164	46.6207	43.4249
Pkib	1.28207	1.07928	0.890292	1.16444	1.10486	1.01824	1.09693	1.37183	0.914356	0.967963	1.03215	1.0345	1.06012	1.26687	1.17081
1810026J23Rik	23.2239	22.1843	22.6721	23.9382	22.7445	20.5903	24.9944	22.3943	23.3382	23.3395	22.3495	22.8546	23.8204	24.7545	23.2624
Trnt1	11.2923	11.787	11.2705	13.3296	11.1245	10.398	9.00694	12.0359	11.7785	10.9357	11.2651	12.3848	11.6772	12.9719	12.207
A930031H19Rik	0	0.0505767	0.0875483	0.0353636	0	0	0	0	0	0.042538	0	0	0.0469589	0	0.0430962
DQ567313	0	0	0	0	0	0	0	0	0	0	0	0	0	0	0
AK189633	0.000162066	1.61E-09	2.48E-08	5.49E-08	7.99E-08	1.10E-09	10.5614	2.85538	1.75E-07	3.29E-07	7.53E-09	1.03E-05	6.55E-07	1.54E-07	5.39E-08
Gss	8.27388	8.23729	7.06459	9.6009	8.41062	8.30261	6.60008	7.95279	7.71279	8.66613	7.07256	8.77948	8.39321	9.57147	7.43404
Gsr	7.7015	7.93907	6.95056	6.72533	7.41758	7.91276	8.29804	6.68047	9.26605	8.50064	9.20207	7.72379	8.68949	9.37353	7.38931
DQ561419	0	0	0	0	0	0	0	0	0	0	0	0	0	0	0
Izumo1	6.23E-09	0.0776233	1.62E-09	0.0409071	0.0632655	0.0780487	0.0426508	0.0500111	0.0695389	0.0347946	0.0347417	0.036205	0.0183085	1.31E-11	0.0165192
Gsc	0	0	0.067241	0.0271608	0.0412066	0.0391683	0	0.0944288	0	0	0.0335429	0	0	0	0
Izumo3	0	0	0	0	0	0	0	0	0	0	0	0	0	0	0
Izumo4	5.97195	9.44557	8.13072	9.5118	9.80196	7.9713	4.28817	8.67288	7.64025	8.4624	7.97896	7.61855	7.81666	10.268	7.1737
Gsn	27.7697	38.8648	26.224	39.1199	31.7397	36.6458	30.2552	32.3997	35.2326	32.9297	33.9924	40.4853	39.6107	34.8104	25.1521
Wnt3	0.556777	0.698978	0.526545	0.886957	0.411928	0.404604	0.575738	0.692246	0.599866	0.816504	0.581215	0.434948	0.504762	0.707204	0.430154
Wnt2	1.71553	1.51824	1.50176	1.59924	1.25497	1.55075	1.5829	1.41397	1.7221	1.80761	2.0261	1.87722	1.46456	1.51548	1.73052
Wnt1	0.237979	0.0869406	0.135445	0.121579	0.0922258	0.105197	0.132045	0.0422689	0.139468	0.277865	0.135132	0.11361	0.145299	0.096611	0.118531
Wnt6	0.612612	0.0808584	0.157462	0.918724	0.343096	1.03952	0.372808	1.03194	1.26108	0.459046	0.418928	1.45285	1.42642	0.112315	0.189473
Wnt4	3.51856	3.02401	3.13193	4.05455	3.14969	4.02722	3.61911	3.56588	4.6256	3.28378	2.86322	4.39599	4.59149	3.93723	2.80032
Syngap1	57.7906	52.5818	60.9077	45.6639	54.423	55.3904	56.7688	51.9365	53.6586	56.2142	49.876	48.1678	48.5519	43.3122	51.7884
Fam219aos	45.8246	43.9592	40.6996	40.4594	41.3181	41.6865	42.823	43.0714	43.1746	43.4488	46.4802	45.2181	43.9383	52.9611	47.5226
DQ696495	0	0	0	0	0	0	0	0	0	0	0	0	0	0	0
DQ555601	0	0	0	0	0	0	0	0	0	0	0	0	0	0	0
Trpd52l3	0	0	0	0	0	0	0	0	0	0	0	0	0	0	0
Grhl1	8.69882	7.12907	8.9239	7.87358	9.0465	8.52692	8.59465	7.79407	8.10789	8.33232	8.57154	8.24572	8.72162	9.50593	7.54933
Grhl2	0.0324426	0.0551038	0.0286153	0.0538791	0.035072	0.122163	0.0479048	0.0670482	0.058931	0.120499	0.0570987	0.0411467	0.0716271	0.0306164	0.0751261
Sod1	185.907	170.806	156.531	187.133	181.596	165.487	194.487	168.858	167.826	165.671	171.805	196.761	207.582	209.065	168.938
U21394	0	0	0	0	0	0	0	0	0	0	0	0	0	0	0
DQ723808	0	0	0	0	0	0	0	0	0	0	0	0	0	0	0
1190005I06Rik	6.36988	7.79082	4.96523	10.35	7.58823	7.1414	7.453	6.11065	5.86567	6.07595	7.76702	7.73468	7.2642	8.32943	7.72483
Defa5	0	0	0	0	0	0	0	0	0	0	0	0	0	0	0
Defa4	0	0	0	0	0	0	0	0	0	0	0	0	0	0	0
Defa3	0	0	0	0	0	0	0	0	0	0	0	0	0	0	0
Defa2	0	0	0	0	0	0	0	0	0	0	0	0	0	0	0
Cyp4f41-ps	0	0	0.0716744	0.144758	0.175694	0.0835016	0	0.100655	0	0.0348252	0.178772	0	0.115333	0.0766866	0.0352822
AK158390	0.572263	0.677806	0.23999	0.473928	0.261459	0.155328	0.267389	0.337026	0.302035	0.310951	0.239436	0.287573	0.400478	0.313833	0.315031
Hhatl	3.3586	5.26149	3.44523	5.99484	6.28232	4.95593	4.04796	4.88498	5.37123	4.80761	4.93824	5.28562	5.60908	5.56723	4.25703
Tmprss9	0.0566706	0.15072	0.140483	0.170237	0.135286	0.152504	0.113199	0.197285	0.216985	0.107263	0.190216	0.108217	0.161468	0.182516	0.187703
Cyp4a12a	0.00830384	0	0.0073517	0	0.00901052	0	0	0.0103242	0	0.00714409	0	0.0158568	0.00788655	0	0
Tmprss2	0	0	0.0382977	0.0178196	0.0406781	0.00716051	0.0276479	0	0.0227129	0	0.0171354	0.0237878	0.011831	0.0117999	0.0108579
Tmprss3	0	0.0148848	0	0	0.0315822	0	0	0.0180918	0.0132655	0.0375614	0	0	0.0138201	0.0137837	0
AK208648	5.08127	3.92763	4.46945	7.0556	5.02785	4.37266	2.84741	4.86527	5.38673	3.60197	5.85261	5.9894	7.86978	8.74495	2.4596
Tmprss5	0.206814	0.651824	0.246901	0.704008	0.626525	0.446069	0.33775	0.654153	0.452212	0.239952	0.380877	0.604395	0.712194	0.612832	0.342369
Tmprss6	0.112256	0.191388	0.0993843	0.214117	0.0812023	0.115784	0.0692013	0.155078	0.227427	0.182433	0.242392	0.226281	0.130309	0.17723	0.206572
Tmprss7	0.242315	0.371492	0.15341	0.222643	0.33856	0.285584	0.211102	0.301272	0.189411	0.223245	0.273304	0.247677	0.131397	0.294842	0.286828
Trhr	3.21296	1.21876	2.09238	1.96085	1.60011	2.08644	2.38964	1.9184	2.20112	1.69717	1.31977	1.46389	2.55988	2.19397	2.03437
AK210432	20.7166	30.7506	24.4165	25.0303	27.0601	29.2957	27.3942	22.9387	22.1856	23.7929	27.0361	28.2554	23.6074	32.6258	25.3824
4933427I22Rik	0.384879	0.367127	0.475313	0.793222	0.660467	0.490883	0.174093	0.239826	0.79869	0.47347	0.336841	0.419407	0.333979	0.267499	0.168131
Tmed11	0	0	0	0	0	0	0	0	0	0	0	0	0	0	0
Tmed10	33.9793	37.3375	33.0139	33.8283	33.6232	35.1549	34.8534	34.5127	33.638	33.6357	35.9283	35.3213	35.6514	34.2601	33.4306
Sdpr	3.23008	3.37019	3.55748	5.95124	4.17793	3.89131	2.68119	3.71078	3.78095	3.84608	4.39379	5.32922	4.1967	3.35342	2.78164
Gm15217	0	0	0	0	0	0.0808355	0	0.0974411	0	0	0	0	7.49E-107	0	0
DQ549816	0	0	0	0	0	0	0	0	0	0	0	0	0	0	0
DQ557819	0	0	0	0	0	0	0	0	0	0	0	0	0	0	0
Gulo	0	0.091412	0.0316469	0.0511328	0.0775753	0.036869	0.0396674	0.0222214	0.0162935	0.0153766	0.0157869	0.0341293	0.0678986	0	0.0311568
DQ707281	0	0	0	0	0	0	0	0	0	0	0	0	0	0	0
AK085446	0.392388	0.401381	0.651367	0.385892	0.266113	0.45531	0.16329	0.121965	0.40243	0.46418	0.259945	0.327815	0.37267	0.41815	0.384767
Podnl1	0.019635	0.020085	0.0522402	0.0284204	0.0426122	0.0405044	0	0.0163158	0.0179	0.0112901	0.0811396	0	0.112171	0.0376468	0.0171144
Rrh	0	0.58678	0.470719	0.292444	0.134351	0.464591	0	0.0509407	0.410312	0.563106	0.793868	0.390001	0.205789	0.205266	0.035713
AK140218	2.35696	2.07266	0.683817	0.734821	1.4661	1.45622	1.59605	1.26551	1.12139	2.27105	1.37896	1.88735	1.77492	2.49007	1.40622
3110082I17Rik	3.63624	3.83651	4.00821	4.3867	4.52126	4.50314	5.11123	4.22589	4.17188	3.74026	4.11777	5.26229	4.8824	4.86244	3.44963
DQ557816	0	0	0	0	0	0	0	0	0	0	0	0	0	0	0
Id4	28.6099	29.3069	24.9255	32.9393	27.612	22.699	33.5138	29.402	28.6152	31.2936	28.3301	27.9671	32.6937	32.9929	26.5905
Id2	63.8415	54.297	47.9713	58.7112	55.1652	50.053	48.7999	53.6026	52.7607	56.0824	46.7942	59.1108	61.8126	54.9524	53.3311
Id3	27.4913	24.1975	23.0329	33.7326	26.0954	28.3046	27.1785	26.6593	27.4383	27.4174	27.4105	30.85	37.6467	30.653	20.1471
Id1	9.43592	10.9942	10.945	14.3278	11.0602	13.0634	10.1352	12.0454	13.4322	10.5925	11.9895	14.1643	13.4186	13.2877	9.98386
Rrnad1	3.97884	4.96999	5.06805	5.51394	5.91197	5.54128	2.75871	6.32244	5.27004	5.15058	5.36928	4.37828	4.61156	6.04238	5.36755
Tpd52	17.235	19.1863	16.1717	19.7334	17.1284	16.256	17.8626	16.9502	16.8949	18.0182	16.6575	20.0034	19.5582	19.1515	18.3211
DQ725401	0	0	0	0	0	0	0	0	0	0	0	0	0	0	0
DQ725400	0	0	0	0	0	0	0	0	0	0	0	0	0	0	0
Asgr1	0.85662	0.318629	0.379205	1.67099	0.591526	1.60648	0.216034	0.91983	1.17142	0.703496	0.894237	1.44992	1.5902	0.29507	0.231936
Asgr2	0.0359345	0	0	0.0514049	0	0	0.0351356	0.0893583	0.0327593	0.0309158	0.12697	0.0686222	0.0341288	0.0680805	0
Csn2	0	0	0	0	0	0	0	0	0	0	0	0	0	0	0
Csn3	0	0	0	0	0	0	0	0	0	0	0	0	0	0	0
Sorcs3	9.13776	9.59699	8.86476	7.47691	7.52673	9.27801	8.95841	9.19343	8.74467	8.96461	7.51405	8.11576	7.62838	7.93602	8.98764
DQ704727	0	0	0	0	0	0	0	0	0	0	0	0	0	0	0
Trub1	4.27191	4.67032	4.79839	4.16506	4.3957	4.53794	3.87097	4.71503	4.18029	4.12148	4.244	3.77999	4.28381	5.0251	4.74741
Trub2	5.82926	5.31832	4.72626	6.90786	6.46633	4.41906	5.28333	4.90943	5.3238	5.96532	5.75222	6.05345	6.28662	5.59134	5.0241
DQ702410	0	0	0	0	0	0	0	0	0	0	0	0	0	0	0
Zfp503	1.53445	1.6918	1.23648	2.10954	1.70492	1.34575	1.64162	1.83925	1.80093	1.45453	1.43653	1.42998	1.59696	1.81905	1.42556
AK153427	0.0420701	0.062363	0.0480117	0.150087	0.0783802	0.0766407	0.079746	0.0254783	0.0689518	0.0921316	0.119592	0.0828249	0.0881614	0.0223622	0.118409
Zfp507	3.68528	3.79374	4.06749	3.393	3.54286	3.80125	3.51245	3.44584	3.85142	4.15744	3.38613	3.28051	3.70178	3.24325	3.99491
AK052801	0.0118062	0	0	0	0	0.0487091	0	0.0293576	0.010763	0	0	0.00901793	0.0448518	0	0
Ide	19.0442	14.228	19.2941	8.96294	14.3577	8.90963	9.48953	15.3314	9.83641	20.5335	8.89792	13.4208	10.0934	8.76651	9.35756
Arpp21	49.9372	41.7219	39.4216	39.9435	36.823	36.9968	34.9385	41.9422	41.4218	38.4206	30.0342	37.0139	42.4836	41.015	45.5241
Barhl2	0.145647	0.0409242	0.00140509	0.114161	0.132604	0.0405859	0.00242164	0.0322057	0.0159151	0.0475793	0.0179903	0.0500052	0.116063	0.0198442	0.0167383
Barhl1	0	0.0236448	0	0.223202	0.0752495	0.0119201	0.0235605	0.0143688	0.0210726	0.0198867	0.0102081	0.0331055	0.0329309	0	0
Gsta4	44.8474	40.0283	39.6185	45.8433	41.3485	39.3032	42.8285	42.2141	38.2569	41.61	39.0955	46.4579	48.2079	48.081	35.2577
Gsta1	0.0280393	0.137642	0.111845	0.109852	0.0202791	0.014457	0.0388858	0	0.0298152	0	0	0.0240889	0.0133121	0.0610107	0.044814
Gsta2	0.212185	0.486187	0.325616	0.561856	0.081864	0.160493	0.141279	0	0.21063	0	0	0.321445	0.255261	0.116129	0.307421
Gsta3	0.188736	0.418302	0.438181	0.298006	0.375466	0.356893	0.0698117	0.351987	0.34412	0.54126	0.333421	0.240271	0.358201	0.476748	0.164507
AK141160	0.0151258	0.0184848	0.017297	0.00306047	0.00202812	0.0321148	0.00412651	0	0.00254503	0.00747824	0.0160856	0.00867148	0.0162604	0.000926176	0.00807567
AK211473	16.0326	16.4815	14.057	19.4451	16.3513	15.7072	14.5027	17.9647	13.2949	10.7663	19.8301	19.8431	16.2666	19.0305	18.0297
Lyl1	0.553574	1.06174	0.633045	1.27029	1.30148	1.37985	0.767888	0.688264	0.925208	0.456416	1.1613	1.32136	1.94968	1.15799	0.944914
Med30	11.8735	12.315	12.3699	12.9952	11.5056	10.4239	11.5215	10.6426	11.8312	9.74004	11.6097	13.1294	13.2174	15.0136	12.6116
Med31	5.62262	5.7827	5.82701	7.79393	6.31597	5.57625	5.12923	6.06453	5.70305	6.66269	4.90128	7.13686	6.01251	7.80494	5.90182
Tmem29	9.35481	9.21455	9.49912	10.968	10.2679	8.66994	7.83212	8.42656	9.09043	9.10451	9.29793	9.89119	9.48424	9.03233	9.70679
Ctag2	0	0	0	0	0	0	0	0	0	0	0	0	0	0	0
Tmem28	9.20891	8.05205	8.1799	8.56465	7.91495	7.61748	10.253	8.5777	9.14327	9.33474	7.27511	7.66082	8.83274	7.39882	8.45058
AK202516	9.68217	0.000291843	21.0766	26.3477	21.7372	22.7101	3.17052	18.3715	20.4732	20.1307	31.5455	22.5632	24.543	30.8397	28.6101
Prepl	127.087	127.23	127.128	115.724	115.088	120.688	130.827	119.38	126.818	127.213	103.492	107.409	113.87	109.764	127.095
Ccnyl1	2.38859	1.96127	2.24616	2.11472	2.15755	2.52358	1.94142	2.38383	2.29523	2.42155	2.33791	1.77516	2.21337	2.48273	2.3633
AK217348	0.334311	0.292068	0.260539	0.267224	0.322505	0.336217	0.0749915	0.312265	0.20536	0.23886	0.373679	0.194284	0.224619	0.279414	0.322659
Tat	0	0.0520203	0.0600315	0.0242487	0	0	0	0.0210761	0.0154537	0.0875044	0.0598929	0.0161851	0.0160997	0.0160574	0.0147755
DQ709773	0	0	0	0	0	0	0	0	0	0	0	0	0	0	0
Upk2	0	0	0	0.0393222	0	0	0	0	0	0	0	0	0	0.0520779	0
DQ709778	0	0	0	0	0	0	0	0	0	0	0	0	0	0	0
Taz	8.52374	12.7698	11.6876	14.53	11.8694	11.3205	6.95558	12.8579	11.6516	13.0921	11.7995	10.7122	14.4132	14.9886	10.7787
Apoc4-apoc2	0	2.80E-05	0	0	3.10E-05	4.98E-07	0	3.34E-05	2.47E-05	0	2.30E-10	2.93E-05	2.56E-05	0	0
Mir409	0	0	0	0	0	0	0	0	0	55.4818	0	0	0	61.0866	0
Aacs	14.6028	14.7218	13.9719	13.0445	13.1127	12.8735	14.8833	14.1761	12.894	13.8763	12.4273	13.4806	14.4464	15.7834	14.891
DQ700819	0	0	0	0	0	0	0	0	0	0	0	0	0	0	0
DQ700818	0	0	0	0	0	0	0	0	0	0	0	0	0	0	0
Rec114	0.0926129	0.19486	0.353494	0.166585	0.0615686	0	0	0.271364	0.122809	0.433365	0.141414	0.00694012	0.129416	0.31184	3.82E-107
Olfr196	0	0	0	0	0	0	0	0	0	0	0	0	0	0	0
Olfr197	0	0	0	0	0	0	0	0	0	0	0	0	0	0	0
Olfr194	0	0	0	0	0	0	0	0	0	0	0	0	0	0	0
Olfr195	0	0	0	0	0	0	0	0	0	0	0	0	0	0	0
Olfr192	0	0	0	0	0	0	0	0	0	0	0	0	0	0	0
Olfr193	0	0	0	0	0	0	0	0	0	0	0	0	0	0	0
Olfr190	0	0	0	0	0	0	0	0	0	0	0	0	0	0	0
Olfr191	0	0	0	0	0	0	0	0	0	0	0	0	0	0	0
Immp1l	6.62155	6.79839	6.10113	7.45473	5.88111	6.17193	7.56576	6.49463	7.33316	7.23699	6.21702	7.9144	8.10556	7.24793	6.24178
Prl7a1	0	0	0	0	0	0	0	0	0	0	0	0	0	0	0
Prl7a2	0	0	0	0	0	0	0	0	0	0	0	0	0	0	0
AK033411	0.182684	0.305789	0.264661	0.463256	0.234274	0.205556	0.129009	0.330376	0.363364	0.200035	0.352067	0.126854	0.299689	0.283169	0.231611
Olfr198	0	0	0	0	0	0	0	0	0	0	0	0	0	0	0
Olfr199	0	0	0	0	0	0.0262746	0	0	0	0	0	0	0	0	0
DQ720641	0	0	0	0	0	0	0	0	0	0	0	0	0	0	0
Hotair	0	0	0	0	0	0	0	0	0	0	0	0	0	0	0
AK049221	0.0026097	0.00500533	0.00259927	0.00116659	0.00530961	0	0	0	0	0.00112261	0.00374583	0.00124585	0.0015491	0.00463506	0.00284335
Prdm9	0.234908	0.346715	0.607595	0.492187	0.57676	0.53355	0.266776	0.415355	0.391751	0.692618	0.588403	0.52218	0.404568	0.466066	0.57384
AK031816	11.8225	13.1282	11.2589	13.4215	13.4707	12.1181	10.9409	13.0467	14.8635	12.3806	12.2468	10.7369	12.7485	12.3009	14.878
Lrrc18	0.318098	0.331771	0.218875	0.338825	0.308003	0.0797067	0.120028	0.219119	0.230579	0.401488	0.136494	0.0943332	0.331718	0.073181	0.0942742
Mb	0.385711	0.0493148	0.0853674	0.206905	0.314753	0.397834	0.107008	0.359663	0.0439536	0.335142	0.212935	0.47492	0.0915821	0.245729	0.232837
Lrrc17	6.02212	4.29111	3.36741	3.43735	3.31747	3.11416	4.38657	3.62346	3.93441	2.87699	4.13879	6.03495	5.37107	3.93394	4.38439
Lrrc14	11.7273	9.17961	9.4287	10.0076	9.73517	10.6506	9.56756	9.61296	9.35061	9.59006	9.65136	9.50738	10.4593	11.0293	10.269
Lrrc15	0.0719508	0.0246526	0.0637031	0.0172373	0.0519951	0.0494766	0.0240267	0.0596403	0.0218625	0.0124182	0.0191244	0.0457506	0	0.0341825	0.062705
Lrrc10	0	0.0307842	0.0266438	0.0215246	0	0.0310403	0.0667927	0	0.0274353	0.0258914	0	0.0287338	0.0285822	0.028507	0
Basp1	233.799	198.054	204.66	183.322	203.581	184.812	193.492	203.97	197.539	217.653	178.45	191.487	193.126	227.531	206.041
Fiz1	7.08892	6.36113	6.50448	6.57868	6.70725	7.45239	7.15492	6.94172	6.69048	6.63687	6.89664	7.17746	6.31069	7.0089	7.39912
Nespas	0	0.0184301	0	0	0.0195506	0.0185791	0.0199828	0	0	0	0	0	0.0171047	0.034122	0.015699
AK217986	559.914	530.719	586.903	529.22	500.359	517.789	483.929	552.165	534.828	581.674	467.561	487.889	491.485	521.327	553.329
Apopt1	19.9215	19.697	17.3912	16.9136	18.2305	17.8073	16.4657	19.8001	15.7807	16.1344	19.1433	19.6196	20.6536	18.7827	16.0311
DQ711310	0	0	0	0	0	0	0	0	0	0	0	0	0	0	0
DQ714144	0	0	0	0	0	0	0	0	0	0	0	0	0	0	0
DQ711315	0	0	0	0	0	0	0	0	0	0	0	0	0	0	0
Myd88	2.72858	2.83541	2.20481	3.20615	3.47775	2.94835	2.85973	3.35208	2.94153	2.99957	4.11252	3.24617	4.33966	3.17952	2.69918
AK172696	0.0153483	0.0451459	0.0391691	0.100811	0.120827	0.0144702	0.0180521	0.0339247	0.0254918	0.0597267	0.145947	0.0133862	0.0132856	0.0258465	0.0492061
Gm20806	0	0	0	0	0	0	0	0	0	0	0	0	0	0	0
D930016D06Rik	1.55631	2.0481	2.29142	1.93763	1.96277	2.34084	0.97074	2.24397	1.92381	2.59192	1.96975	1.59437	1.93026	2.2298	2.81753
AK142535	0.00379751	0.0194227	0.0336207	0.027161	0	0	0.00301011	0.0236074	0	0	0.0167715	0	0.0721334	0.0239812	0.0331
DQ714492	0	0	0	0	0	0	0	0	0	0	0	0	0	0	0
AK034494	0.00157695	0.00112916	0.00808592	0.00921106	0.00290896	0.0600904	0	0	0.0301897	0.00949693	0.0113754	0.0421581	0.0104839	0.0104563	0.0408916
AK214184	3.6549	2.88988	3.64074	3.02112	3.03078	4.00107	4.07578	4.76275	3.84208	2.89326	3.86232	2.74494	3.21892	7.89858	3.09805
AU042671	12.8153	8.8137	9.19388	7.3188	8.48433	8.74655	11.0827	7.94791	7.91885	8.02293	15.4118	14.4467	11.2272	17.946	10.0342
AK046316	1.11008	1.1835	1.30116	1.17417	1.05186	1.24172	0.954267	0.99139	1.01199	1.17026	0.952904	0.985247	0.890953	1.09595	0.858551
DQ552690	0	0	0	0	0	0	0	0	0	0	0	0	0	0	0
1700012B09Rik	0.405671	1.34619	0.610194	0.6025	1.34717	0.473922	0.934837	0.605233	0.488694	0.790658	0.74407	0.65807	0.581862	0.797973	0.353582
DQ548742	0	0	0	0	0	0	0	0	0	0	0	0	0	0	0
DQ554228	0	0	0	0	0	0	0	0	0	0	0	0	0	0	0
DQ554222	0	0	0	0	0	0	0	0	0	0	0	0	0	0	0
Gm11186	0	0	0	0	0.0409953	0	0	0	0	0	0	0	0	0	0
AK090257	0.502463	1.04112	0.769648	0.661727	0.898228	1.16796	0.417845	1.02972	0.669712	0.8443	0.63608	0.883079	0.407253	0.988041	0.759378
1700028D13Rik	0	0	0	0	0	0	0	0	0	0	0	0	0	0	0
AB340013	0	0	0	0	0	0	0	0	0	0	0	0	0	0	0
4930539M17Rik	0.0571977	0	0	0.0818193	0.124131	0	0	0	0.156431	0	0	0.0546115	0	0	0
BC038474	0.649618	0.492227	0.575131	0.585087	0.73101	0.645218	0.373796	0.598278	0.570282	0.434692	0.531299	0.66619	0.434166	0.569768	0.440396
Glb1l2	0.0843385	0.39292	0.290087	0.347765	0.128037	0.386017	0.104747	0.308039	0.550943	0.669894	0.354328	0.247837	0.291339	0.224573	0.0801238
Glb1l3	0	0.0166652	0	0	0	0	0	0	0.0148522	0	0	0.0155552	0.0309463	0	0
DQ540240	0	0	0	0	0	0	0	0	0	0	0	0	0	0	0
Gm11237	0	0	0	0	0	0	0	0	0	0	0	0	0	0	0
Gm11238	0	0	0	0	0	0	0	0	0	0	0	0	0	0	0
Gm11239	0	0	0	0	0	0	0	0	0	0	0	0	0	0	0
DQ547298	0	0	0	0	0	0	0	0	0	0	0	0	0	0	0
Gm4827	0.0610867	0	0	0.0436912	0	0	0	0.0759496	0	0.052555	0.0539574	0	0.232068	0	0
AK006623	0	0	0	0	0	0	0	0	0	0	0	0	0	0	0
D17H6S53E	7.33688	7.93516	6.32788	7.66435	7.36345	7.02556	5.56388	8.1155	8.4992	8.26817	7.74204	7.29694	8.28368	8.22598	7.78784
Gm6093	0	0	0	0	0	0	0	0	0	0	0.282351	0	0.023262	0	0
Efhd1	12.9075	17.6514	12.1608	17.2953	13.7313	13.503	16.0854	15.7619	12.543	13.9354	13.5553	13.0708	15.1651	15.256	12.7144
AK144274	0	0	0	0	0	0	0	0	0	0	0	0	0	0	0
AK039749	0.00344325	0.00333805	0.00130647	0	0.0224177	0.0142059	0.00507652	0.0142701	0.00941699	0.0203133	0.00296536	0.00123284	0	0.0138619	0.00300123
Fam206a	4.7734	4.66954	4.66966	4.88182	4.79676	4.51807	4.76876	4.56535	4.92484	4.94722	4.84223	4.91525	5.11857	4.52171	4.6914
Usp47	18.9564	18.7906	19.6595	16.9753	17.7644	19.5497	20.3008	19.2457	20.3714	20.4742	17.9924	18.3857	18.8123	16.9036	20.2024
Eddm3b	0	0	0	0	0	0.154438	0	0	0	0	0	0	0	0	0
DQ688995	0	0	0	0	0	0	0	0	0	0	0	0	0	0	0
Zcchc12	36.2926	17.6873	22.2037	22.3582	19.5864	20.6725	24.301	22.1136	22.9306	22.8102	16.9291	20.2291	30.1246	25.9639	19.198
Krt28	0.0859977	0.0586457	0.101516	0.0820112	0.124422	0.0887005	0.127244	0.0712811	0.209063	0.0739869	0.0759611	0.109479	0.108901	0.149345	0.112437
Zcchc10	4.40768	4.32978	4.97076	4.84137	4.15647	4.96114	4.61953	5.13216	4.83141	5.58279	4.4649	5.37738	6.16299	5.3018	5.65605
Zcchc17	31.3118	29.7193	30.2838	31.5011	30.8251	30.6748	29.4302	31.6261	30.3813	29.8444	28.291	32.6497	32.0958	33.2014	29.8459
Alkbh8	5.49586	6.30125	6.9067	5.42111	5.40901	5.53767	4.6757	5.17747	6.05022	7.1211	7.90312	4.60237	4.40155	4.0451	6.97026
Olfr1274-ps	0	0	0	0	0	0	0	0	0	0	0	0	0	0	0
Zcchc14	15.4912	15.83	18.0406	14.9131	15.4033	15.2898	17.5872	16.4467	18.9728	15.9477	15.978	15.7351	14.8899	14.9152	17.3789
Krt23	0.0816745	0.225818	0.21546	0.118709	0.0443122	0.0857341	0.0453173	0.0507725	0.297884	0.456215	0.146233	0.116973	0.0789447	0.232099	0.0355944
Krt20	0.0845342	0.216179	0.243234	0.226731	0.137592	0.130786	0.234522	0.367857	0.25046	0.109092	0.112003	0.141246	0.321145	0.16015	0.34999
1700126H18Rik	0	0	0	0	0	0	0	0	0	0	0	0	0	0	0
Krt26	0.0614956	0.0314525	0.0544443	0.0329877	0.0166823	0.0475712	0.0682426	0.0573435	0.0420462	0.0661336	0.0543186	0.0440363	0.0584053	0.0145629	0.0268006
Krt27	0	0	0	0.0193721	0	0	0.0150284	0	0	0	0	0	0	0	0.0590201
Krt24	0	0.0253737	0	0	0	0.0255848	0.0275267	0	0	0	0	0	0.0235587	0	0
Krt25	0	0.02604	0	0.0364148	0.0828692	0	0.0141248	0	0.0464144	0.0438025	0	0	0	0.0361706	0.0443773
Alkbh6	19.0888	18.9669	16.5919	22.8616	19.2569	18.4069	20.0799	19.8395	20.7103	19.6731	18.1783	23.9212	23.559	21.943	20.8412
Ppp1r18	2.82254	2.89142	2.22439	3.3836	3.19049	3.39747	3.09799	3.51851	3.07499	2.44037	4.06053	3.15754	4.96063	3.07864	2.64572
BC026933	0	0	5.36E-06	0	4.58E-06	4.69E-07	0	0.000100563	3.85E-06	0	0.0529046	0	0	0	0
Dnaja2	64.2412	64.2277	65.7611	60.7993	62.0212	59.3949	57.4469	61.1815	62.7575	64.9998	60.1856	65.9583	63.7681	66.54	64.0641
Dnaja3	25.8115	24.4976	23.8719	24.5428	24.3098	24.651	25.8057	25.6085	24.4001	25.0784	23.2451	24.9492	25.5489	26.3291	23.4782
Dnaja1	48.2742	46.1638	49.963	48.1182	45.801	43.5773	45.6024	48.6523	47.2532	51.6835	46.8254	49.6233	48.8305	54.8807	51.4802
Dnaja4	21.9693	22.9215	22.524	23.9975	22.4776	20.9324	22.3385	25.308	22.4724	23.2766	21.2797	23.1083	23.528	25.9055	25.0688
Sgf29	5.78188	7.55945	6.81392	8.07908	7.64506	5.84511	6.37375	6.66498	6.28328	6.81915	6.76436	7.71401	6.36412	6.38364	6.60826
AK076673	0	0	0	0.121398	0	0	0	0	0	0	0	0	0	0	0
A630010A05Rik	0	0	0.0121868	0	0.0149366	0	0.0152754	0	0.0125488	0.0118426	0.0121586	0	0	0.013039	0.0239961
Gm19402	0	0	0	0	0	0	0	0	0	0	0	0	0	0	0
AK042124	0	0	0	0.0308862	0	0	0.0479214	0	0	0	0.0762872	0	0	0	0.0376398
AK042126	0.142828	0.318117	0.18157	0.105505	0.0746291	0.225197	1.03E-08	0.170247	0.0603837	0.336153	0.225893	0.136809	0.204371	0.121525	0.0587232
Acer2	3.14784	5.93414	3.06732	5.62085	4.90164	3.25617	3.70704	4.65622	4.03982	3.69269	6.38862	5.96892	5.38273	4.72881	4.54125
Acer3	1.82077	2.39534	2.12817	2.57037	2.23482	2.33121	1.94526	2.07316	2.41335	2.41344	2.41452	2.19016	2.48724	1.86505	1.95775
Acer1	0.00150504	0.00987866	0.00355959	0.00572827	0.00703604	0.00155234	0.00510329	0.00228706	0.00323412	0.00395645	0	0.00684965	0.00174705	0.00261368	0.00592666
Gm28490	0	0	0	0	0	0	0	0	0	0	0	0	0	0	0
Recql	5.2473	5.53507	5.33503	5.66909	5.89024	5.67578	4.29791	5.25886	5.49016	5.79275	5.14731	5.16134	6.58663	5.43176	5.41591
D330045A20Rik	0.107015	0.106669	0.132643	0.0765405	0.104509	0.110378	0.10688	0.0931353	0.0780462	0.0552399	0.0661668	0.0306502	0.0711449	0.182468	0.0839488
Psma8	0.247426	0.137615	0.230157	0.168888	0.0875874	0.111008	0.149292	0.30108	0.180416	0.127697	0.131104	0.308282	0.255546	0.16403	0.123489
Alppl2	0	0	0	0	0	0	0	0	0	0	0	0	0	0	0
Lactb2	3.62229	4.91429	3.63325	4.32058	3.68119	4.74072	3.09676	3.91857	4.27991	4.42508	3.94385	2.73755	3.66892	4.40563	3.55791
Agbl4	2.26098	3.27592	2.4417	2.6767	1.76032	2.52162	2.18699	2.90581	2.50302	2.84962	2.21275	2.65787	2.75285	2.41923	2.68553
Agbl3	2.52407	3.99981	3.13254	3.02035	3.36502	2.90914	2.61136	2.46542	3.58399	3.35965	2.04915	3.09325	3.1737	3.75319	2.81045
Agbl2	0.213123	0.499423	0.419308	0.374733	0.399347	0.425553	0.338256	0.511488	0.399382	0.482218	0.526723	0.376463	0.502782	0.392551	0.288968
Agbl1	0.0698331	0.0952428	0.08127	0.0582757	0.0884033	0.0961633	0.118655	0.0570098	0.0978409	0.05273	0.0540026	0.0222247	0.0580656	0.0551234	0.0266445
Ccser2	17.3357	16.4789	17.4641	15.6836	17.0525	16.8716	16.8932	16.8145	17.4806	17.3355	16.5671	15.345	16.6345	15.4864	17.0897
Ccser1	1.79531	1.9196	2.05388	1.95303	1.91782	1.73919	1.78796	1.83376	1.8988	2.18469	1.80895	1.94974	1.87276	1.69554	1.98638
Stard8	2.20499	2.21706	1.82189	2.10373	2.6625	2.77128	2.07007	2.49655	2.56514	2.08435	2.35192	2.27623	2.59505	2.17247	2.24829
Stard9	0.375867	0.646187	0.746958	0.642969	0.875361	0.800115	0.504798	0.399308	0.719055	0.516953	1.18892	0.540617	0.628659	1.02154	0.729389
Srp14	89.888	88.926	80.249	97.7176	93.1043	85.8406	93.0537	89.0942	81.9452	83.8235	84.2834	96.4767	96.3856	108.487	83.992
Stard3	10.435	10.949	11.3583	12.508	10.2745	10.8582	11.2037	12.4487	11.8844	11.7367	11.175	12.6843	12.1755	13.9901	11.4229
Srp19	25.8315	24.0672	23.5614	25.9238	26.2295	23.6411	24.2807	26.0338	25.5927	26.5223	24.7004	28.5232	27.4427	29.9161	25.7816
Stard6	0.613275	0.690198	0.353002	0.80934	1.09814	0.761906	0.738856	0.761046	0.754938	0.738738	0.893977	0.762792	1.07779	1.05649	0.710997
Stard7	36.7182	32.6504	34.1223	32.8653	34.2057	33.7419	34.6543	34.1752	34.9421	36.0795	33.6239	34.9412	36.3197	37.0266	34.1235
Stard4	4.74191	6.08355	4.65553	5.1212	5.5479	5.37118	5.53665	4.15873	4.49835	4.51267	4.39909	5.18513	5.04844	4.00244	5.94272
Stard5	3.49949	4.29223	4.5519	4.41278	4.40919	4.34505	4.28835	4.59839	3.87065	4.75154	4.871	4.18053	4.23723	5.29439	4.48622
AI314278	0	0	0	0	0.00167529	0	0	0.00263937	0.00140747	0.00162344	0	0	0	0	0
Usp42	4.44661	4.32455	4.47182	3.73652	3.95613	4.34165	3.77194	3.5653	4.08205	4.31998	3.76761	3.86784	4.05955	4.14516	4.21986
1700110C19Rik	0.213331	0.14548	0.377739	0.356023	0.231486	0.293381	0.0789122	0.176824	0.19448	0.244715	0.376867	0.13579	0.202611	0.336795	0.371889
AK199258	24.065	20.1359	13.5176	25.2748	25.1212	21.7403	22.0783	23.1724	10.489	17.3737	39.6486	29.7522	26.5526	29.6224	19.1244
BC023719	1.56E-118	3.76E-259	7.65E-74	0	1.01E-143	1.08E-260	9.51E-160	1.75E-303	6.94E-156	3.38E-122	0	2.32E-85	0	2.95E-205	1.66E-201
AK161911	0.823918	0.942572	0.992254	1.06741	0.569878	1.18735	0.511963	1.15712	1.00869	0.918527	1.03786	0.657307	0.384154	0.761018	0.649015
AK131900	0.494134	0.654799	0.238623	0.449809	0.536187	0.231666	0.0996998	0.223404	0.327615	0.231884	0.238072	0.257341	0.170656	0.212758	0.156618
Dock8	0.634437	0.936308	0.604566	1.0738	1.00899	1.14125	0.988888	0.981844	0.896261	0.704159	1.47947	0.910945	1.39836	0.756944	0.913118
Dock9	37.3648	42.1948	45.8276	32.997	45.1675	41.6894	39.3219	42.4591	43.0989	41.5529	42.8788	37.4855	35.0822	45.0038	42.3012
Dock2	1.47357	1.97791	0.901775	1.81459	1.12981	1.8187	2.18401	1.24805	1.22844	1.08959	2.4645	1.77437	3.91622	1.38434	1.20836
DQ720605	0	0	0	0	0	0	0	0	0	0	0	0	0	0	0
Dock1	6.23042	8.26351	6.36897	8.02165	6.58879	7.32057	5.86304	7.55654	6.95757	6.14949	6.74211	6.04637	6.41526	5.41105	6.50092
Dock6	2.09535	2.16746	2.56993	2.52245	2.38107	2.83063	1.31657	2.85774	3.05446	2.80426	2.85897	2.28119	2.1163	2.10035	2.09819
Dock7	4.64478	4.80775	4.9629	4.7325	4.56315	5.69676	4.23638	5.76363	5.04874	5.13672	4.57922	4.78382	4.93796	4.44769	4.57362
Dock4	41.8805	40.0606	48.7827	32.597	42.5814	42.9648	42.5003	41.9241	44.9635	45.6016	43.7456	36.4724	34.4368	42.563	41.3405
Dock5	0.949661	1.92167	1.76721	1.83657	1.85364	1.88081	1.27241	1.97511	1.77557	1.87171	1.87891	1.90346	1.742	1.42626	1.44496
DQ720398	0	0	0	0	0	0	0	0	0	0	0	0	0	0	0
BC039791	0	0	0.0289884	0	0	0.0337718	0	0	0	0	0.0289214	0.0625246	0	0	0
BC039798	1.02586	0.666892	0.243953	1.42822	3.02671	0.295118	0.00015357	1.70121	0.997423	3.69E-05	1.61384	1.30539	0.000686326	0.000414546	0.267539
AK166079	0.698959	0.500485	0.680696	0.699886	0.53091	0.288371	0.310259	0.434511	0.637197	0.541206	0.740862	0.867563	0.597451	0.397253	0.670154
Phxr1	0	0	0	0	0	0	0	0	0	0	0	0	0	0	0
AK135736	0	0	0	0.0263988	0	0	0	0	0	0	0	0	0.0350546	0	0
Hsd17b12	40.035	39.7311	36.4318	41.6382	37.6848	39.1786	40.2273	38.8936	38.5101	40.3166	37.0542	39.9779	41.4467	39.8224	37.2618
Hsd17b13	0.0341064	0	0.0301962	0	0.0501062	0.00497948	0	0.0424056	0.0310927	0	0.00426432	0	0.0323925	0.00571635	0
Hsd17b10	24.8522	27.5535	23.1557	28.2464	26.8541	24.1823	24.1676	22.9313	24.1761	22.7708	26.8759	31.638	32.6586	27.7855	23.8416
Hsd17b11	23.8872	23.9246	20.1562	26.6426	25.2609	23.5548	24.2594	24.4461	23.3715	22.0841	26.2172	28.8858	27.8527	27.6486	22.3401
Hsd17b14	0	0.0649098	0	0.0472944	0.107632	0.0682026	0	0.0411015	0.0904258	0.0568834	0.0584072	0.0631346	0.0313971	0.0312473	0.0288145
AK020705	0	0	0	0	0	0	0	0	0	0	0	0	0	0	0
DQ552333	0	0	0	0	0	0	0	0	0	0	0	0	0	0	0
4930519H02Rik	0	0	0	0	0	0	0	0	0	0	0	0	0	0	0
Cngb1	0.0492213	0.175219	0.049025	0.0783878	0.0534102	0.0444233	0.0829864	0.0698964	0.0560899	0.116454	0.119721	0.0621353	0.0968683	0.0407967	0.0482653
Cngb3	0	0.0334637	0	0.00584953	0	0.0168711	0	0.0101684	0	0	0	0	0.00776751	0.00774707	0
DQ711879	0	0	0	0	0	0	0	0	0	0	0	0	0	0	0
DQ686732	0	0	0	0	0	0	0	0	0	0	0	0	0	0	0
DQ686731	0	0	0	0	0	0	0	0	0	0	0	0	0	0	0
Fthl17-ps1	0	0	0	0	0	0	0	0	0	0	0	0	0	0	0
Cox20	18.1094	20.6775	20.8472	24.1788	23.6999	20.0759	19.3032	19.1887	17.2389	21.5331	23.5821	22.3978	21.7096	26.5409	21.2115
4930517M08Rik	0	0	0	0	0	0	0	0	0	0	0	0	0	0	0
Nup214	5.70083	5.41193	5.6548	4.30626	5.1501	5.87501	6.08234	5.96574	5.87318	5.07523	5.08556	5.4382	5.46249	5.27177	5.74577
Nup210	3.32733	3.38857	3.32982	2.74932	2.64528	3.30128	2.52074	3.81052	2.96162	3.10319	2.88935	2.65041	3.48666	2.46351	3.85894
Cyp2c66	0	0	0	0	0	0	0	0	0	0	0	0	0	0	0
4930448F12Rik	0	0	0	0	0	0	0	0	0	0	0	0	0	0	0.0490177
AK132074	0.042607	0.0241361	0.0159669	0.0166677	0.0214282	0.0148816	0.0177391	0.0106475	0.0127231	0.0213883	0.0185744	0.0144009	0.0124703	0.013935	0.0112043
Olfr1158	0	0	0	0	0	0	0	0	0	0	0	0	0	0	0
Msmp	0.160296	0.758208	2.80508	1.68301	0.143954	2.05991	0.479599	0.570223	1.10001	1.9717	1.89977	0.51097	1.28879	0.766955	1.32752
DQ569461	0	0	0	0	0	0	0	0	0	0	0	0	0	0	0
Olfr1155	0	0	0	0	0	0	0	0	0	0	0	0	0	0	0
Olfr1156	0	0	0	0	0	0	0	0	0	0	0	0	0	0	0
Serpina4-ps1	0	0	0	0	0	0	0	0	0	0	0	0	0	0	0.0279414
Olfr1151	0	0	0	0	0	0	0	0	0	0	0	0	0	0	0
Olfr1152	0	0	0	0	0	0	0	0	0	0	0	0	0	0	0
Olfr1153	0	0	0	0	0	0	0	0	0	0	0	0	0	0	0
Slc23a1	0.0338295	0.0772886	0.116135	0.0191093	0.0236349	0.0642794	0.0272605	0.0301103	0.052543	0.0832826	0.0659474	0.0251226	0.028835	0.0605971	0.0481378
Slc23a3	0.158946	0.142265	0.0703605	0.0852627	0.172473	0.0819708	0.220482	0.172917	0.144901	0.119654	0.070198	0.0948497	0.169829	0.150562	0.103906
Slc23a2	22.8624	23.6981	26.0093	20.8243	21.8447	25.2046	23.541	22.1971	25.5627	25.8242	22.4251	22.1663	21.9963	20.9308	24.142
Mir22hg	9.76312	9.81801	8.99859	8.38558	11.0774	9.65217	7.64573	10.6726	10.1676	9.37095	9.89432	9.53307	10.2686	11.6335	8.81811
Msmb	0	0	0	0	0	0	0	0	0	0	0	0	0	0	0
Bbx	3.54673	4.28271	4.62343	3.70081	4.38465	4.38019	3.78889	4.20042	4.81241	4.72491	4.51961	4.11702	4.25833	3.35624	4.44342
4930517E11Rik	0	0	0	0	0	0	0	0	0	0	0	0	0	0	0
Snord17	0.933171	0	0	1.33487	0	0	0	0	0	2.40852	1.64853	0	0	0	0.813376
Snord11	0	0	0	0	0	0	0	0	0	0	0	0	0	0	0
Snord12	0	406.516	175.92	0	215.614	0	0	0	0	170.952	0	0	377.437	752.888	519.586
DQ567480	0	0	0	0	0	0	0	0	0	0	0	0	0	0	0
DQ567485	0	0	0	0	0	0	0	0	0	0	0	0	0	0	0
Snord19	0	0	1313.67	0	0	0	0	0	0	1276.57	0	0	0	0	0
DQ726291	0	0	0	0	0	0	0	0	0	0	0	0	0	0	0
Dusp18	10.6069	9.13039	10.847	8.48677	8.48491	7.6008	7.99881	7.96932	8.80788	13.6696	9.52841	8.04468	8.1296	7.40725	7.99318
Dusp15	2.64909	5.07269	3.23714	5.27127	3.90379	3.26074	1.95987	2.77218	4.44864	3.96984	3.50051	3.2911	2.93397	3.53955	4.21938
Dusp14	20.2418	17.8842	19.1541	17.8512	19.7951	16.3423	17.9576	20.732	16.6762	18.4828	17.7118	20.4631	17.4195	19.4468	24.915
Dusp16	2.93045	3.32247	2.49789	3.22963	3.35558	3.2264	2.65457	3.08991	2.89586	3.19486	3.44405	2.74086	2.99221	2.53999	2.91314
Dusp11	3.46483	5.39498	5.51215	5.98818	5.22893	5.54964	2.9395	5.60168	4.86736	5.22932	5.7031	3.86141	4.85745	5.17511	5.58139
Dusp10	1.87998	1.87799	1.96349	2.12198	2.34278	1.63609	1.22241	1.80783	1.83436	1.94595	1.93301	1.86509	1.9808	1.44691	1.77946
Dusp13	0.190945	0.14642	0.422292	0.034641	0.207095	0.147475	0.158844	0.0602174	0.173847	0.123012	0.294879	0.273338	0.225788	0.0903945	0.207142
Dusp12	5.44648	6.98389	7.5715	9.88082	8.08007	7.9819	5.3699	7.60081	7.31722	7.84811	7.80374	7.12423	6.57334	8.64356	7.52045
Sgpl1	6.61074	8.70604	6.61279	9.05564	7.93977	8.05962	8.68071	8.43684	8.72593	7.10413	9.20276	8.13496	10.0949	8.17728	7.68304
AK139591	0.0096025	0.0229193	0	0.0300476	0.0145876	0.00770334	0	0.0104465	0	0.0072287	0.015293	0	0.0106399	0	0.00976475
Fate1	0	0.102669	0	0	0	0	0	0	0.04575	0	0.0443276	0.0958308	0	0	0.0437421
DQ555958	0	0	0	0	0	0	0	0	0	0	0	0	0	0	0
JA375473	0	0	0	0	0	0	0	0	0	0	0	0	0	0	0
Snord1a	62.2038	77.0486	0	44.3413	0	0	0	0	0	0	0	0	0	0	0
Snord1b	0	0	0	0	80.7243	0	0	0	0	0	0	0	0	0	0
Snord1c	0	0	0	0	0	0	0	0	0	0	61.1185	0	0	0	0
Slc20a2	15.9515	16.0421	14.792	17.0995	15.8536	16.411	15.4252	16.5077	16.3807	14.3436	14.5488	15.2563	15.6139	15.5813	14.0118
Eef2k	17.9161	19.2977	17.8503	16.0983	17.3775	19.705	18.8514	18.099	20.5763	22.232	17.1205	14.6099	14.7385	18.6532	17.7076
Slc20a1	30.7544	34.5532	32.5937	36.2691	32.3157	32.9064	30.7506	36.2027	33.4541	31.0656	30.4966	29.0385	33.8907	33.8339	37.4069
DQ692282	0	0	0	0	0	0	0	0	0	0	0	0	0	0	0
DQ550209	0	0	0	0	0	0	0	0	0	0	0	0	0	0	0
Cadm4	83.0363	80.8257	71.2251	80.3889	78.2409	74.0201	77.2918	70.5636	72.2049	71.4229	73.829	83.1216	82.6292	81.0525	72.4589
Zik1	4.00973	3.62909	3.5745	4.18289	3.40859	4.04046	3.69096	3.31973	3.97548	3.78356	3.28878	3.86372	4.14167	3.85072	4.41302
Cadm2	28.0904	28.8605	31.3934	26.359	28.885	27.0394	26.5065	30.048	28.8151	32.3368	28.9667	24.877	24.0597	23.056	30.7261
Cadm3	108.844	94.6365	98.0118	78.0755	95.3528	92.7896	100.579	94.0437	91.2003	95.9027	83.942	86.965	86.1842	94.3096	96.7693
Srcin1	44.7596	43.623	42.8141	40.9996	40.3226	39.6711	42.8938	42.6012	41.4933	42.4012	36.8641	39.5956	40.8925	37.1318	43.3066
Cadm1	69.7282	58.5562	62.4321	60.4423	59.4132	66.7599	61.1176	57.9613	53.1406	60.1725	54.3556	45.7746	49.8847	50.7782	55.7693
8430426J06Rik	0.17852	0.364184	0.263419	0.273427	0.129141	0.344017	0.0660329	0.147893	0.216996	0.204784	0.210248	0.227265	0.282565	0.225471	0.182826
DQ693489	0	0	0	0	0	0	0	0	0	0	0	0	0	0	0
DQ693481	0	0	0	0	0	0	0	0	0	0	0	0	0	0	0
Spin2c	4.66155	4.59595	3.99655	3.23645	4.34672	3.93814	3.36481	4.56945	3.96437	3.03795	3.78924	4.88256	4.03352	5.24432	3.93405
Spin2d	0	0	0	0	0	0	0	0	0	0	0	0	0	0	0
AA536875	0	0.00318068	0	0.00172947	0	0.00601769	0.0276388	0.00300585	0.0216731	0.0257094	0	0	0.04328	0.0103193	0
AK083606	0.0444341	0.0340894	0	0.039726	0.0361617	0.0458306	0.0246546	0.0690567	0.0506348	0.0382283	0.0588725	0.0106063	0.0211006	0.0420902	0.0968248
DQ695884	0	0	0	0	0	0	0	0	0	0	0	0	0	0	0
Sptbn4	27.7416	32.5116	32.1814	28.1271	31.5898	30.276	25.6371	28.2473	28.7515	30.3727	27.6496	29.1041	27.4819	30.7129	31.9777
Sptbn2	156.122	149.779	160.488	139.867	154.83	150.024	163.24	155.105	151.395	152.355	157.706	167.866	141.88	122.899	157.574
Sptbn1	125.6	131.415	138.114	119.64	132.279	144.351	125.264	133.264	132.945	128.009	132.054	128.515	120.261	98.2509	134.175
Nell1os	0	0	0	0	0	0	0	0	0	0	0	0	0	0	0
DQ688565	0	0	0	0	0	0	0	0	0	0	0	0	0	0	0
Cldn34a	0	0	0	0	0	0	0	0	0	0	0	0	0	0	0
Noct	19.6494	17.0692	18.4175	17.5688	17.9995	16.9181	18.5849	18.3324	20.0318	18.629	18.2844	18.6191	18.4487	21.9711	19.2408
C130050O18Rik	0.0408386	0.02304	0.199071	0.128298	0.122005	0.0842972	0.0453192	0.127071	0.169026	0.123075	0.226434	0.175621	0.231448	0.116176	0.119231
Dfna5	3.29873	3.04778	2.81058	3.06971	2.86742	3.18289	3.24735	2.69013	3.37911	3.03637	2.39679	3.23424	3.58775	3.05752	3.30809
Hsf2bp	0.0708914	0.0141495	0.0857248	0.0197869	0.0600386	0.0448398	0	0.0515941	0.0756611	0.0378835	0.0122181	0.0264141	0.0656868	0.054283	0.0761492
Ski	35.739	33.0033	34.0483	32.511	34.2802	34.0289	40.5848	36.3968	37.5193	33.5567	34.3016	32.9978	34.4196	34.6806	35.6529
DQ706712	0	0	0	0	0	0	0	0	0	0	0	0	0	0	0
DQ725177	0	0	0	0	0	0	0	0	0	0	0	0	0	0	0
Gm2560	0	0	0	0	0	0.0544313	0	0	0	0	0.0466138	0	0	0	0
DQ725170	0	0	0	0	0	0	0	0	0	0	0	0	0	0	0
Slx4ip	1.73679	1.91955	2.3852	2.13866	1.91553	1.42755	1.66024	1.7278	1.84708	2.09424	1.89041	1.49888	1.85556	2.00713	1.84199
AK077029	0	0	0	0.00733062	0.0111215	0	0	0	0	0	0.00905311	0	0	0	0
Krtap11-1	0	0	0.0405619	0	0	0	0	0.0569625	0	0	0	0	0	0.0433984	0
Scoc	69.7958	65.8611	64.8943	68.4026	65.4933	65.1016	63.9512	66.5998	70.2053	68.4056	66.0942	68.223	67.0928	80.8221	68.0662
AK136612	0.0121849	0.0584456	0.071081	0.0398884	0.09868	0.0576552	0.0163474	0.0257817	0.0698495	0.0291065	0.0609299	0.0325132	0.0220705	0.0408444	0.0893031
Adig	0	0	0	0	0.0933872	0	0	0	0	0	0.0760187	0	0	0	0.0750147
Hpse2	0.0373778	0.0573516	0.016546	0.0534676	0.0202794	0	0.0207394	0.0232361	0.0170375	0.0482362	0.0165078	0.0178439	0.0177497	0.0531091	0.0488692
Fnd3c2	0.0106647	0	0	0	0	0.0164998	0	0	0	0	0	0	0	0	0
C330021F23Rik	24.439	21.1628	19.6553	25.8714	23.8786	22.8987	28.4117	22.4342	22.7206	20.9765	27.0486	28.8992	29.8742	28.4863	22.7195
Gm16451	0	0	0	0	0	0	0	0	0	0	0	0	0	0	0
Rab22a	14.4679	12.7649	12.6729	13.397	13.6751	12.5604	13.2102	12.3123	12.0894	12.6389	13.7839	13.0873	13.3994	9.87402	12.9734
AK082954	4.69E-06	0.000723633	0.219432	0.152211	0.0007258	0.000707352	0.000734058	5.85E-06	0.0888859	4.02E-06	3.30E-06	8.27E-07	4.81E-07	0.0844833	0.138402
Cdk2ap1	32.7858	34.2336	29.1356	36.8702	31.9076	31.8972	31.8953	31.7507	31.8738	31.9586	31.2924	37.7815	37.3871	34.2031	36.3837
Cdk2ap2	16.3076	13.6968	12.5004	17.3279	16.1125	14.2407	14.9169	16.1944	14.6291	16.9436	16.6594	17.5601	20.3374	20.1852	16.0306
Speer4cos	0	0.00440852	0.0546115	0.0174841	0.0113553	0.0226057	0.0131124	0.0316089	0.0192589	0.00452876	0.0283842	0.0408342	0.0456294	0.0165104	0.0335864
Adi1	14.837	15.6842	14.4581	19.0863	15.9475	14.0558	16.6478	15.2977	15.1064	15.0806	15.9495	17.193	17.4424	17.1753	16.0211
Pcsk1n	158.437	136.682	120.988	138.407	136.913	121.774	167.62	133.273	156.002	135.209	103.107	114.529	134.75	152.78	130.971
DQ567974	0	0	0	0	0	0	0	0	0	0	0	0	0	0	0
4933402J07Rik	0	0	0	0	0	0	0	0	0	0	0	0	0	0	0
Pdk1	10.5233	11.1749	11.0901	11.0158	10.5616	10.831	9.90641	9.4143	10.4772	11.4757	10.5286	10.7098	11.0056	10.1024	11.0462
Pdk3	16.1413	16.3329	14.7444	15.1828	16.0684	16.0351	17.0132	14.8666	16.7156	16.4279	15.8336	15.4311	16.0898	14.2796	14.1407
Pdk2	57.3916	50.2705	50.0031	51.6815	48.4734	48.0501	58.4671	49.802	49.9881	49.3299	48.26	51.0217	51.755	53.0084	48.4646
Pdk4	3.93415	4.88543	4.17815	5.75133	4.3931	3.53625	5.20183	4.65525	4.64339	4.3451	5.06146	4.66683	4.7219	4.19773	3.60155
Slc13a1	0.00310584	0.0542563	0.0358158	0.00332099	0	0.0108797	0	0.00477862	0.0457397	0.0132267	0.0152771	0.0218235	0.0335801	0.025223	0.0156341
Grpel1	10.6235	9.7115	9.27006	11.5134	10.4366	9.64646	10.1635	10.6837	10.0615	10.0562	9.3299	12.0486	12.0854	11.5087	10.2468
Grpel2	3.53786	3.41298	4.13382	3.58301	3.7297	3.25843	3.48448	4.02316	3.6142	3.91398	3.13343	3.64337	3.81992	3.8689	3.76477
Il12rb1	0.12426	0.33708	0.215635	0.163957	0.217651	0.147774	0.174889	0.160316	0.0914266	0.221872	0.379656	0.24623	0.530687	0.135713	0.0999021
Il12rb2	1.80269	1.75475	2.44193	1.7085	1.86145	2.10555	1.8798	1.51221	2.1186	2.05526	2.37856	2.32242	1.77399	1.62518	2.42296
Nanog	0.0460068	0.00643337	0.00506013	0.0224623	0.0498778	0.0121161	0	0.0332598	0.02043	0.0222301	0.0246888	0.00706806	0.00621899	0.00338204	0.0211633
Prkrir	23.6974	23.2213	21.5227	24.2624	23.942	23.4848	24.4299	24.4835	23.7783	22.5413	23.0191	23.6593	25.099	25.9225	22.8623
Ankrd33b	10.9872	13.7538	12.7815	11.2421	10.6898	12.581	13.4425	13.0253	13.6225	11.7113	11.9604	12.2035	10.8363	11.591	14.4855
Scn5a	0.808902	0.281011	0.207509	0.1206	0.219208	0.265802	0.328717	0.339961	0.307433	0.380027	0.225618	0.531769	0.479085	0.333265	0.395026
AK053994	0	0	0.0699816	0	0	0	0	0	0	0	0	0.0754711	0	0	0
Hif3a	0.532332	0.67366	1.30443	1.35018	0.60741	0.373585	0.292317	0.875156	0.85051	0.64684	1.0423	1.25229	0.421704	0.727789	0.660119
Pecr	2.32605	2.64208	2.42679	3.13981	2.99966	2.86352	2.91683	2.6361	2.93224	2.34686	2.58939	2.70903	3.90623	3.59241	2.54048
DQ564444	0	0	0	0	0	0	0	0	0	0	0	0	0	0	0
DQ699081	0	0	0	0	0	0	0	0	0	0	0	0	0	0	0
DQ564443	0	0	0	0	0	0	0	0	0	0	0	0	0	0	0
Golga1	4.65885	6.1719	5.74997	7.20429	5.57437	5.94932	4.05812	6.05002	6.50752	6.6698	5.98523	5.54253	6.0745	6.36553	6.11358
Golga2	20.6079	20.9816	21.8498	19.8744	22.7173	22.0169	21.435	20.7975	21.4544	22.2154	19.7162	22.3322	21.2276	20.7943	21.7628
Golga3	11.1801	12.0698	12.9993	10.7522	11.7233	12.4921	11.3822	11.4968	12.2342	12.9213	11.1331	11.3758	10.3153	9.51173	12.5173
DQ721210	0	0	0	0	0	0	0	0	0	0	0	0	0	0	0
Golga5	7.83664	8.841	7.78074	8.94772	8.1124	8.49821	6.69161	8.31552	8.14409	8.82338	7.50032	8.59307	9.15835	8.79611	8.02777
DQ689385	0	0	0	0	0	0	0	0	0	0	0	0	0	0	0
Golga7	39.2621	42.645	36.0051	46.8029	43.0634	39.1583	39.13	40.0717	36.2777	39.1833	40.9524	41.9387	42.5236	44.5919	37.4119
DQ691258	0	0	0	0	0	0	0	0	0	0	0	0	0	0	0
AK161543	3.17057	2.34634	2.65487	2.39348	3.17595	2.51812	2.17865	2.50339	2.75891	2.48383	3.7433	2.00633	2.4323	3.15542	2.79046
4930546C10Rik	0.0347836	0	0	0	0	0	0	0	0	0	0	0	0.0330356	0	0.0151591
Ring1	8.25283	10.0892	10.1579	9.73225	10.5278	7.61946	5.20459	8.05849	7.61533	8.29512	8.74759	7.91811	8.54544	9.97205	8.1408
M36767	0	0	0	0	0	0	0	0	0	0	0	0	0	0	0
Vmn2r32	0.00465522	0.00596364	0.014531	0.00893293	0.00633843	0.0128671	0.00123983	0.0081257	0.00109688	0.00724663	0.00454554	0.00106674	0.00360777	0.00493881	0.00755355
Tbk1	12.2395	12.5734	13.0056	13.5367	13.1724	13.0275	11.4143	12.9162	14.2201	14.6439	12.1697	12.0719	13.9271	14.3349	14.1221
AK048032	0	0	0	0	0	0	0	0	0	0	0	0	0	0	0
1700019D03Rik	4.22954	6.48966	6.06158	8.31605	7.40324	5.34984	5.59199	6.41037	7.71216	8.93641	5.50696	6.45334	2.77653	8.51281	6.53382
Vmn2r37	0.00289907	0.00131107	0.00702534	0.00236122	0.00519381	0.00479398	0.00101594	0.0038817	0.0034026	0.0026383	0.00477104	0.00332159	0.00701389	0.00396912	0.00616222
DQ543271	0	0	0	0	0	0	0	0	0	0	0	0	0	0	0
Gm10857	0.227726	0.431409	0.408052	0.376753	0.233586	0.267932	0.059197	0.338464	0.18813	0.407759	0.396104	0.241225	0.319407	0.325311	0.280723
DQ690615	0	0	0	0	0	0	0	0	0	0	0	0	0	0	0
Bop1	19.817	17.1626	19.8763	19.6896	19.72	18.6316	16.9774	19.3638	20.9917	19.9046	16.6772	18.4594	20.4968	20.6808	19.1367
Vps13d	9.40114	10.6217	11.9035	8.05656	10.2892	12.2651	11.2361	11.1005	11.1629	10.1417	11.7104	11.3929	9.17333	9.94583	11.9991
Soga3	18.5015	19.2126	22.459	17.4046	19.3231	21.0829	16.9409	19.0185	19.0093	21.4776	18.0266	17.2394	15.9778	14.677	20.9351
Soga1	6.6134	6.71146	7.42262	6.15937	6.65619	7.1209	7.17349	6.8805	6.98274	6.90633	7.22254	5.86085	5.77756	4.97895	6.78594
Vps13b	5.22801	6.02943	6.46347	4.58489	5.40035	6.06788	5.03247	5.6716	5.41003	5.52221	5.53401	4.90612	4.50302	3.66988	5.96238
Gja1	118.779	94.8482	88.3737	112.952	91.7753	89.4673	118.699	96.2615	84.857	99.7085	88.9309	87.8806	111.36	78.6544	92.497
Gja3	0.356903	0.272168	0.325744	0.0422893	0.227941	0.24394	0.431335	0.220538	0.39523	0.23937	0.414959	0.285473	0.399089	0.297368	0.305412
Gja4	1.62433	1.5046	1.14272	1.63664	1.34321	1.86862	1.29943	0.945514	1.83368	2.10461	1.70227	1.75614	1.70604	1.39431	0.734987
Gja5	0.126152	0.224347	0.16758	0.315895	0.287047	0.290164	0.252063	0.228147	0.251796	0.282017	0.547201	0.372135	0.351121	0.0836695	0.155778
Gja6	0.170264	0.0581472	0.100594	0.0871911	0.185047	0.0586309	0.0227954	0.0706946	0.153851	0.0524406	0.0897326	0.0775978	0.0192966	0.107629	0.148641
Gja8	0.0329183	0.101018	0.0582876	0.00389335	0.0714396	0.0679058	0.07306	0	0.0300096	0.0283139	0.058153	0	0.00516993	0	0
AK206368	0.000579188	1.1387	0.000354135	6.41169	6.36325	2.54858	3.14775	0.591199	0.000417011	1.73132	5.38392	0.00346214	1.34868	18.8352	4.39554
Gsdmcl-ps	0	0.0218308	0	0	0	0	0.0236832	0	0	0	0	0	0	0	0
DQ726888	0	0	0	0	0	0	0	0	0	0	0	0	0	0	0
Fam13b	21.3393	23.023	22.6334	24.0178	22.7256	21.9982	22.8652	24.875	22.2521	22.6057	21.2769	22.6724	23.0383	22.2739	25.7365
Abcc8	5.18912	5.83925	6.21234	5.50716	6.13273	6.31721	4.91436	7.31681	6.12793	6.42177	7.40491	5.80333	4.78378	6.22534	7.23525
Abcc9	1.08401	1.37182	1.26119	1.30773	1.34909	1.44038	1.22068	1.20051	1.11922	1.1794	1.65673	1.28314	0.944412	1.00525	1.05056
Abcc4	1.75299	2.65599	2.58387	3.09569	2.83057	2.76654	2.25489	2.49658	2.40938	2.08048	3.1579	3.22195	2.43893	1.9115	1.61801
Abcc5	21.2978	26.4137	25.9016	25.7906	24.3401	23.5403	17.1598	26.9503	22.3413	23.898	21.752	19.8214	22.6299	25.5089	27.6779
Abcc6	0.14722	0.261558	0.185219	0.227219	0.26905	0.239758	0.137577	0.250475	0.22604	0.226652	0.198479	0.118369	0.22813	0.234869	0.141828
Abcc1	2.73811	3.47041	3.22651	2.84561	3.30071	3.62634	2.98873	2.94881	3.33408	3.86533	3.49968	2.51948	3.13161	3.04341	2.89642
Abcc2	0.021313	0.05087	0.0188692	0.0254063	0	0.0146552	0.00788379	0.0441644	0.0194297	0	0.0188256	0.00678311	0.00674732	0.0134591	0.0557309
Abcc3	0.498895	0.741479	0.367	0.631344	0.774431	0.739743	0.638815	0.629892	0.54002	0.422614	0.757309	0.632557	0.750844	0.664479	0.631922
Taco1	10.0451	9.12959	9.81014	9.64912	9.09836	10.0969	9.38572	9.99038	7.99295	9.62408	8.35074	8.79816	9.93058	8.96657	8.4242
Cyp21a1	0.0428572	0.0328796	0.0189715	0.107285	0.0813829	0	0.0475593	0.0266424	0	0	0.0473193	0.0204597	0.0610553	0.0608946	0.0186777
Nudcd2	6.678	5.82219	6.38525	6.64862	5.79707	4.8215	6.04726	6.01159	5.67392	6.50381	5.87513	6.65668	7.97583	7.86917	5.21537
Nudcd3	40.9671	39.2354	38.2568	36.8742	42.334	40.1449	42.1557	38.3843	39.4737	38.1042	40.1184	41.6304	39.0271	42.1974	39.122
Nudcd1	4.54672	5.36732	5.0332	5.01288	4.41995	5.03498	4.10168	4.46564	4.35924	5.08735	4.97783	4.25825	4.7325	4.7911	4.46319
DQ696512	0	0	0	0	0	0	0	0	0	0	0	0	0	0	0
Ift74	6.85803	8.36886	9.24351	9.44532	8.69913	8.88636	6.4299	8.92818	9.38671	9.83913	9.04688	9.42677	9.63252	9.83213	9.17344
Preb	9.47039	9.50475	9.44016	9.9135	9.81595	9.39348	8.20198	9.78563	9.61636	10.2125	8.86543	9.53859	9.91789	11.2767	9.28481
Prep	8.90505	7.95551	8.71386	6.87202	8.0895	8.56554	7.94792	7.39329	9.41334	9.24905	7.1801	8.39054	7.91504	8.01908	8.54061
AK050506	1.25E-09	2.70E-09	5.83E-10	0.00634709	0.00967734	0.0104727	0.00435983	5.59E-10	0.00810792	2.99E-10	0.000563115	2.75E-10	0.00140867	0.00211142	0.000858647
Slc25a22	120.3	93.6162	103.129	85.1409	101.923	94.3914	99.4005	95.7245	96.2567	101.843	98.1776	98.8071	101.013	114.389	92.9025
AB350106	0	0	0	0	0	0	0	0	0	0	0	0	0	0	0
DQ723102	0	0	0	0	0	0	0	0	0	0	0	0	0	0	0
Gm10142	0	0	0	0	0	0	0	0	0	0	0	0	0	0	0
Higd1a	25.2817	26.5156	25.3356	28.1649	23.5465	24.5273	21.1816	26.0012	23.7274	26.8054	25.209	26.0934	27.7125	29.7089	26.1885
Slc25a20	6.76527	6.1567	6.40262	6.95778	6.37909	5.6545	7.01566	6.352	5.7634	6.52287	7.76843	7.4617	8.10918	7.22602	5.99845
Higd1b	2.43251	2.34607	2.7689	2.68428	1.58371	2.43728	1.85101	2.41949	1.77405	1.79381	2.70112	3.05246	2.83833	1.90919	1.87793
BC089491	0.145739	0.0745396	0.161285	0.182416	0.158142	0.15032	0.202161	0.135899	0.0664306	0.0626923	0.225278	0.0347874	0.173019	0.207077	0.222303
Slc25a21	0.187745	0.268683	0.116352	0.230055	0.285213	0.162149	0.208166	0.209476	0.12568	0.129336	0.116216	0.178789	0.338838	0.0741083	0.200324
AK051451	0	0	0	0	0.0791483	0	0	0.181376	0	0	0	0	0.0692754	0	0.0635771
AK051452	0	0.0155961	0	0	0	0	0.0169194	0	0	0	0.0269345	0	0	0	0
2700038G22Rik	0.170254	0.20237	0.177224	0.315226	0.146727	0.276724	0.0837282	0.283469	0.107819	0.0572156	0.295312	0.0672686	0.154665	0.360973	0.257043
Pex11g	0.946631	0.735614	0.557062	1.05397	1.44419	0.700526	0.573301	0.496724	0.819633	0.995403	0.863423	1.0997	0.935011	0.956067	0.735463
Gm11437	0	0	0	0.0514069	0	0.0741332	0	0	0	0	0	0.0343123	0	0	0
Ap4m1	4.66164	4.87652	4.74614	4.92612	4.12904	4.54714	3.35236	4.00468	4.01201	4.45813	4.06972	4.41499	4.20215	3.60356	4.78281
Ssx2ip	27.2441	25.6771	25.1521	20.8932	25.2702	24.128	26.5986	24.0545	25.8059	25.2562	24.4604	24.2806	25.5107	31.0238	25.5585
DQ548237	0	0	0	0	0	0	0	0	0	0	0	0	0	0	0
4930428G15Rik	0.0610867	0	0	0	0	0	0	0	0	0.052555	0	0.0583246	0.116034	0	0
Atg9a	44.0173	36.3066	39.7628	34.3666	38.3004	38.9919	39.1052	36.3104	38.4067	40.5945	33.6832	37.5399	38.3606	37.9579	42.5261
Atg9b	1.01882	0.887704	0.920491	1.01656	1.02815	0.903345	0.986065	0.870657	0.912282	1.02847	0.751769	1.11473	1.44261	1.10255	1.10199
DQ721450	0	0	0	0	0	0	0	0	0	0	0	0	0	0	0
DQ708036	0	0	0	0	0	0	0	0	0	0	0	0	0	0	0
Sqrdl	2.80837	3.29877	3.15748	4.42892	3.39491	3.86997	3.29605	3.48196	3.67627	3.26988	4.70428	4.15082	4.9125	4.04407	2.90613
Ahrr	0.118062	0.146647	0.177379	0.132695	0.127084	0.191358	0.0935816	0.177068	0.190269	0.189706	0.162057	0.152983	0.136157	0.183728	0.146006
Bhmt2	0	0.0799152	0	0.139693	0.0423867	0.0302175	0.0433481	0.0728498	0.106832	0.15123	0.10351	0.0745923	0.0927484	0.0925044	0.0340477
Nt5dc2	3.96427	2.83665	4.61033	3.68765	4.05905	3.12573	4.22322	3.33943	4.44539	4.96163	4.08206	3.65079	3.91498	3.9358	2.61818
Nt5dc3	51.6103	50.3012	54.4186	44.3801	51.0958	51.6548	56.5761	51.2328	54.0645	54.395	52.5303	47.7995	45.8175	48.1379	51.3224
Nt5dc1	0.804404	0.915992	0.636964	0.75988	0.708134	0.782722	0.572771	0.566105	0.722198	0.985101	1.00546	0.700742	1.03784	0.747575	0.489506
Ugt1a10	1.11E-103	2.34E-73	3.33E-134	8.44E-234	2.05E-152	1.34E-90	8.85E-181	1.56E-46	4.22E-89	3.03E-91	4.42E-63	4.48E-104	6.38E-46	3.25E-30	1.07E-85
Psap	647.215	629.372	602.791	619.187	602.153	611.649	662.9	603.836	613.978	626.108	629.841	648.772	666.165	687.599	577.922
Olfr849	0	0	0	0	0	0	0	0	0	0	0	0	0	0	0
Rxfp2	0.0709891	0.102391	0.147463	0.059237	0.108615	0.103243	0.0525569	0.123858	0.121572	0.114777	0.0884147	0.115279	0.0950162	0.0947661	0.087154
Olfr845	0	0	0	0	0	0	0	0	0	0	0	0	0	0	0
Olfr846	0	0	0	0	0	0	0	0	0	0	0	0	0	0	0
Olfr847	0	0	0	0	0	0	0	0	0	0	0	0	0	0	0
Olfr843	0	0	0	0	0	0	0	0	0	0	0	0	0	0	0
9030624J02Rik	16.7841	16.2038	16.1592	17.1233	16.2136	17.6458	17.985	15.7412	16.2119	16.4471	15.9458	17.6646	17.9903	18.1691	16.762
Ltn1	8.39545	9.06753	10.3867	8.2848	8.34646	8.407	8.81301	8.37058	9.65067	10.3595	8.26345	7.54097	7.85972	8.92711	9.04231
Ckmt2	0	0.0293915	0.0508767	0	0.0311782	0	0	0	0	0.04944	0	0.0274338	0	0.0272173	0.0250444
Gtf2a1	7.86617	7.29625	6.76852	7.23283	7.40603	6.96666	7.10153	6.94055	7.50078	8.00062	8.38055	7.49454	8.00518	8.43457	7.64735
Gtf2a2	12.4846	15.5102	15.3121	16.2736	16.7071	13.9999	11.7299	14.3447	13.4197	17.1615	14.9426	16.4804	17.5442	16.9421	13.3064
Isg20	0.36485	0.314598	0.308586	0.979223	0.727715	0.893551	0.425774	0.52673	1.00138	0.3342	1.50054	0.682901	1.29436	0.465608	0.410166
BC040754	0.0279694	0	0.0247623	0	0	0	0	0.0347746	0	0	0.0494103	0	0	0	0
4930596D02Rik	0	0	0	0	0	0	0	0	0	0	0	0	0	0	0
Map2k4	54.319	49.5617	53.636	48.8479	52.5416	52.3451	55.6511	52.7648	57.1074	55.5533	49.2674	48.942	50.3154	55.2189	57.1265
4930412C18Rik	0.464249	0.487381	0.343066	0.503755	0.600592	0.393149	0.562317	0.434419	0.453665	0.45534	0.517786	0.453634	0.593113	0.461357	0.310046
Gm12169	0	0	0	0	0	0	0	0	0	0	0	0	0	0	0
Pbxip1	14.951	18.0624	15.7307	19.1726	15.903	17.2966	15.4613	16.1024	17.2144	16.9299	19.9324	17.7118	18.8441	16.0145	13.01
4933432G23Rik	0	0	0	0	0	0	0	0	0	0	0	0	0	0	0
4933404G15Rik	0	0	0	0	0	0	0	0	0	0	0	0	0	0	0
Gm16845	0.405444	0.430792	0.264427	0.337083	0.290169	0.236249	0.289073	0.0810379	0.386046	0.415383	0.253476	0.336423	0.443887	0.375873	0.251185
Bhmt	0.0394598	0.020182	0.227079	0.0705575	0.042818	0.091575	0.0218946	0.122652	0.0899327	0.220667	0.0407563	0.131865	0.112431	0	0
Aloxe3	2.57251	2.56689	2.73864	2.58495	2.38043	2.65336	2.24177	2.53127	2.5754	1.95524	2.16076	2.56168	2.65309	3.0049	2.21475
2200002J24Rik	0	0	0	0	0	0	0	0	0	0	0	0	0	0	0
DQ703976	0	0	0	0	0	0	0	0	0	0	0	0	0	0	0
Masp1	5.04974	4.10226	4.0593	4.99321	4.04665	4.04391	3.50053	4.75146	3.74454	3.8729	3.61284	3.51625	4.28493	3.53778	2.99507
Masp2	0.0682133	0.0879317	0.241567	0.243942	0.296074	0.211071	0.0756974	0.339241	0.4353	0.352118	0.12971	0.065129	0.129571	0.452304	0.297282
Naaladl1	0.1811	0.0741003	0.0962009	0.259058	0.176861	0.22415	0.241164	0.157615	0.198117	0.140226	0.111975	0.13833	0.275199	0.188702	0.0473555
Fam124b	0.0831509	0.0992327	0.147233	0.0594723	0.0601516	0.0857643	0.015379	0.0172304	0.138973	0.0357689	0.0122411	0.0132319	0.0394862	0	0.0966353
0610031O16Rik	0	0	0	0	0	0	0	0	0	0	0	0	0	0	0
Fam124a	4.48447	3.94444	3.81166	4.39628	3.90648	3.65432	3.30384	4.09768	4.4384	4.13224	3.2993	4.49988	4.49295	4.11574	4.35213
Daam1	13.4108	14.523	15.911	14.5104	15.7284	14.3073	12.649	15.8056	14.3815	16.074	15.2886	13.6829	13.8268	15.6292	14.6843
Daam2	27.0055	39.1642	33.6076	45.4496	38.3963	32.8775	28.7418	35.3655	36.9047	30.2336	40.1567	35.2184	31.7452	27.6466	31.6831
Zfp52	1.19468	1.46392	1.33313	2.00564	1.55292	1.39481	1.15773	1.64523	1.79628	1.81832	1.59295	1.45355	1.60347	1.70927	1.55112
Zfp53	2.43997	2.15368	2.25769	2.12544	2.59367	2.55136	2.05636	2.66664	2.44659	2.58367	2.45747	2.00817	2.03538	2.28177	2.76325
Zfp51	1.11101	1.36107	1.31953	1.48379	1.5788	1.433	1.27404	1.22534	1.25798	1.42767	0.879616	1.31813	1.30331	1.3133	1.34907
Zfp57	1.4042	0.99376	1.44363	0.91889	1.23623	0.755457	0.469538	0.962597	0.882951	1.44545	0.854244	0.630735	0.800616	1.04784	0.94844
Zfp54	0.315907	0.312375	0.330961	0.587473	0.348505	0.317689	0.438212	0.373131	0.604794	0.471102	0.411586	0.573093	0.315034	0.448868	0.376318
Zfp58	2.60284	2.74954	2.31274	2.90195	1.96609	2.14965	1.63759	2.62154	2.50472	2.35638	2.3147	2.30384	2.50325	2.73304	2.49083
Zfp59	1.43138	1.2766	1.51434	1.44867	1.28552	1.54604	1.38381	1.44971	1.25871	1.58696	1.36557	1.39781	1.56665	1.30904	1.08399
Dus1l	8.72759	10.255	10.1378	10.5757	10.7602	8.87865	6.88078	8.68694	8.74638	10.1727	9.59847	9.63315	11.0695	10.1085	9.8679
Ntmt1	13.3198	13.0242	12.6436	13.3214	10.8598	12.1639	11.5126	10.8731	12.43	10.8921	10.5671	13.9547	13.7333	14.1585	11.8782
Cask	7.76117	7.70683	8.4112	7.48944	6.73089	7.21226	7.04354	7.05069	7.88156	7.96153	6.5772	7.0481	7.04819	6.60338	7.62175
Nbas	7.98304	9.85638	8.24276	8.92321	10.1524	10.0647	8.69085	9.07901	8.62325	8.38805	9.01145	8.6476	8.77842	9.07999	8.41269
Zyx	14.4803	13.8965	12.2878	13.6937	14.9576	14.4473	14.1543	13.0949	14.2903	13.6489	13.2962	14.6013	15.8628	14.3411	12.9453
DQ726867	0	0	0	0	0	0	0	0	0	0	0	0	0	0	0
DQ704690	0	0	0	0	0	0	0	0	0	0	0	0	0	0	0
Plcd4	4.79988	5.45025	6.04908	8.128	5.41397	5.77067	4.79435	6.26481	5.65906	6.86388	6.91041	6.25571	6.28944	6.12254	5.80933
Plcd3	3.0473	3.96489	2.5761	3.82247	3.15168	2.60435	3.05501	3.77562	3.60363	2.79486	2.85673	3.76002	4.57994	3.54622	3.70879
DQ565452	0	0	0	0	0	0	0	0	0	0	0	0	0	0	0
Plcd1	2.07274	2.29715	2.8259	2.6531	2.89208	2.58172	1.70044	2.20399	2.20495	2.45821	2.3763	2.07981	2.88803	2.65536	2.09473
abParts	0.0036493	0.0125053	0.00323086	0.0316086	0.270689	2.28566	0.0516014	0.0249546	0.209496	0.0141283	2.8923	0.00383273	4.4053	0.0120988	0.00477123
4933416E03Rik	0	0	0	0	0	0	0	0	0	0	0	0	0	0	0
Sec13	25.3686	27.8048	25.1501	29.9725	28.0376	26.3217	23.2891	28.2428	25.9738	27.4877	26.753	30.4092	32.3854	30.8848	25.9606
Krr1	7.41834	7.24462	7.64057	7.59523	7.01858	7.31609	6.84669	7.57589	7.69758	7.91604	7.28369	7.53368	7.46211	7.93759	7.50575
DQ702626	0	0	0	0	0	0	0	0	0	0	0	0	0	0	0
Zfp330	9.42135	9.40674	9.84175	9.77625	10.1097	9.32044	7.5319	9.34638	9.59195	9.85516	9.70806	9.62886	9.99196	11.3044	9.15618
Vmn1r125	0	0	0	0	0	0	0	0	0	0	0	0	0	0	0
Zfp334	3.97422	3.65956	4.19387	3.35535	3.493	3.92604	3.6992	3.64187	4.11679	4.20669	3.46324	3.52505	3.28911	2.85414	3.89621
Zfp335	6.40854	6.85593	6.45271	6.94473	6.66414	6.36969	5.27018	5.99557	6.72407	6.07404	6.27407	5.93215	6.11876	6.04776	6.87803
Vmn1r124	0	0	0	0	0	0	0	0	0	0	0	0	0	0	0
BC037156	0	0	0	0	0	0	0	0	0	0	0	0	0	0	0
Foxe1	0	0	0	0	0	0	0	0	0	0	0	0	0	0	0
Foxe3	0	0	0	0	0	0	0	0	0	0	0	0	0	0	0
Gm17821	0.0397703	0.0238962	0.0208463	0.0260512	0.0303488	0.0341319	0.0206366	0.0286809	0.0277626	0.0246942	0.0249136	0.0230811	0.0292142	0.0245087	0.0294867
Suz12	8.60604	9.37264	9.57516	8.42401	8.60995	9.40504	7.93235	8.79937	10.3185	10.3363	9.65416	9.21231	9.36523	9.29863	8.9414
Aicda	0	0	0	0	0	0	0	0	0	0.0144511	0.148367	0	0.0159529	0	0
Vmn1r120	0	0	0	0	0	0	0	0	0	0	0	0	0	0	0
Chmp4b	94.7429	93.0172	86.9964	91.1966	90.6322	92.111	89.51	89.8323	90.7544	91.7504	90.7872	98.3611	100.387	106.196	90.6872
Chmp4c	0.0929023	0.0293833	0.0678193	0.0332234	0	0.0360801	0.0515476	0.0288765	0.0786922	0.0797391	0.0632826	0.122527	0.0789461	0.102157	0.0699194
1810041L15Rik	14.2912	9.98524	13.0834	10.6804	11.8379	10.7735	13.8305	12.201	13.0313	12.4532	10.9917	10.5855	13.3375	11.2501	11.7289
DQ705017	0	0	0	0	0	0	0	0	0	0	0	0	0	0	0
AK036410	0.0448495	0.0700554	0.0205421	0.0148584	0.0250489	0.0470672	0.0252539	0.0278982	0.0208286	0.0395227	0.0400202	0.0216756	0.0639509	1.65E-30	0.0408224
AK202301	7.78644	9.06127	7.10294	10.3491	9.20164	9.64064	9.83015	10.6216	9.75671	8.78729	11.3607	8.99951	12.3053	10.0632	8.28437
7630403G23Rik	0.0419539	0.386238	0.11143	0.780177	0.455243	0.432724	0.325898	0.678101	0.382467	0.288755	0.555863	0.400569	0.757066	0.198704	0.219408
Mir211	0	0	0	0	0	0	0	0	0	0	0	0	0	0	0
Odf3	0.153481	0	0.0452941	0.073183	0.0555142	0	0.0567734	0	0	0.08803	0.180758	0.0488471	0.0971787	0.0969229	0
Odf2	11.1463	12.707	14.0647	11.9371	13.2716	13.3234	7.89394	12.6753	12.5046	12.5935	11.6111	10.2767	11.8782	11.8632	11.6972
Odf1	0	0.0418199	0.0361952	0	0	0	0.0907369	0	0	0	0	0	0.0388285	0	0
Scgb2b7	0	0	0	0	0	0	0	0	0	0	0	0	0	0	0
Odf4	0.0406479	0.0415819	0	0	0	0.0419279	0	0	0	0	0	0	0.0729604	0.0385059	0
Mir1957b	16.1552	50.2273	4.50868	3.76E-63	45.666	3.11E-102	28.7457	4.60332	43.6665	5.72916	28.3128	0	9.82E-92	62.0861	3.40081
AK020853	1.94E-146	2.05E-132	0.0699714	0.0275446	8.65E-92	0.0404249	4.00E-192	0.0968538	5.73E-97	0.06778	0.0345569	0.110771	8.05E-97	8.05E-75	0.102398
Mir1957a	0	0	0	0	0	0	0	0	0	0	0	0	0	0	0
Myocd	0.044986	0.0383475	0.0478665	0.0536259	0.065086	0.135433	0.0342833	0.0480138	0.098581	0.0664506	0.0477579	0.0762039	0.044013	0.0198534	0.0336602
Trmt10a	0.994239	1.0998	0.866211	1.29911	1.00647	1.01882	0.752351	1.15144	0.930081	1.11568	1.0586	0.891823	1.04038	1.09673	0.879765
Gm20300	10.671	11.2907	10.4707	12.699	10.7023	9.60446	9.38133	11.0473	10.4161	10.9518	10.0844	11.67	10.9775	11.0001	11.5908
Trmt10b	4.21212	4.45365	4.46422	5.40249	4.63651	3.88498	3.86525	3.97808	4.98452	4.79113	4.50757	4.25369	4.69284	5.14086	4.7481
DQ714751	0	0	0	0	0	0	0	0	0	0	0	0	0	0	0
Zranb1	15.1339	15.4934	15.4202	13.3531	16.0962	15.1847	14.9752	14.3621	15.5977	15.8421	15.365	15.8267	14.9037	15.6265	14.6438
Zranb3	1.64263	1.89378	1.72215	1.54356	1.73994	1.57604	1.63248	1.6989	1.6104	1.60853	1.72158	1.61292	1.58579	2.12182	2.04055
Zranb2	31.2531	42.2944	38.9128	47.5331	42.5192	35.5363	24.3877	44.5262	40.4168	43.0548	36.1116	35.1703	42.4691	42.5044	43.8344
DQ711509	0	0	0	0	0	0	0	0	0	0	0	0	0	0	0
DQ711508	0	0	0	0	0	0	0	0	0	0	0	0	0	0	0
Gm9696	0	0	0	0	0	0	0.0143631	0	0	0	0	0	0	0	0
Efr3a	55.951	99.74	89.8067	98.2094	55.9029	74.7013	73.5721	75.5315	78.1871	68.4947	70.638	73.3494	64.7243	47.994	92.2485
Crnkl1	5.79086	5.31436	6.16501	6.26697	5.58944	5.88781	6.29965	6.31758	6.09901	6.76425	5.75903	5.38384	6.02955	5.70726	5.37349
Efr3b	33.7291	34.5979	33.8141	31.0935	35.6923	35.1525	37.3968	33.1165	36.0956	33.5178	32.4641	32.6682	31.731	32.5366	35.6058
DQ540891	0	0	0	0	0	0	0	0	0	0	0	0	0	0	0
Prox1	12.2826	12.4631	16.3241	12.2446	13.7166	14.2202	16.9982	13.7509	14.209	15.6785	14.1478	11.5857	11.5576	8.93424	14.5266
Lad1	0.541704	0.729815	0.713537	0.907187	0.444438	0.722259	0.6158	0.772067	0.65042	0.591085	0.490153	0.655975	0.903481	0.58822	0.978875
Gsdmc4	0.039187	0.0200426	0.00433671	0.00467131	0	0	0.0217432	0.0730823	0.0178622	0.0252855	0.00573251	0.00796527	0	0	0.0056568
Gsdmc2	0	0	0.00435272	0.00468861	0	0	0	0	0	0	0.00579042	0.0109521	0	0	0.00571394
Gsdmc3	0	0	0.00420693	0	0	0	0	0	0	0.00817625	0.00559628	0.0105862	0	0	0.00552237
AK043153	1.72668	1.7789	1.95095	1.74143	2.07828	1.75539	1.40321	1.55046	1.8694	2.00891	1.04846	1.33669	1.19935	1.21761	1.75901
AK043157	0.0672865	0.243379	0.370542	0.414933	0.298471	0.315104	0.15266	0.462619	0.22558	0.321951	0.210725	0.195937	0.128937	0.325836	0.397317
Uox	0.224745	0.275875	0.139283	0.273267	0.146323	0.115904	0.224463	0.195599	0.0819545	0.251363	0.11911	0.150208	0.277487	0.191601	0.0587681
4930474G06Rik	0.0449766	0.0460074	0.0265463	0.0750604	0.0813405	0.1268	0.0332742	0.0931997	0.0580867	0.0644917	0.026485	0.085886	0.0569553	0.042604	0
DQ549625	0	0	0	0	0	0	0	0	0	0	0	0	0	0	0
AK031662	0.0102227	0.0104725	0.00903633	0.0146849	0.0111009	0.0105923	0	0.01267	0.00936544	0.0263342	0.0179902	0	0	0	0.00896096
AK086439	0.0914031	0.140247	0.161845	0	0.0495909	0	0	0.113642	0.0416632	0.117956	0	0.0436352	0.043405	0.0865814	0.0796693
AK034016	0.596428	0.129527	0.264423	0.213525	0.138384	0.30777	1.18E-05	1.27E-05	0.326366	0.385266	0.607375	1.02E-05	0.334011	0.141652	0.260557
Mrpl4	23.5498	23.658	24.9609	23.9284	25.0364	20.2238	20.0909	23.6118	25.7679	23.5559	21.4163	24.6593	25.315	29.0036	22.1997
AK046830	0.0607567	0.106541	0.176739	0.11795	0.178946	0.223808	0.0385273	0.129601	0.094951	0.149346	0.168664	0.0995632	0.090677	0.0904384	0.158871
Mrpl2	27.5369	22.4622	23.6596	25.8269	25.5244	23.894	24.8805	20.8831	23.0641	24.8707	22.4851	28.123	29.8722	28.4648	22.6534
Prkd2	1.05709	1.12952	1.3133	1.55876	1.07902	1.44389	1.09461	1.24164	1.12409	1.37136	1.29033	1.10143	1.58315	1.02395	1.26011
Mrpl1	3.60324	4.37476	3.68836	4.54502	4.36342	3.70291	3.82791	3.96592	4.26599	4.01873	4.15415	4.00309	5.03145	4.22542	3.6755
Mtap7d3	0.0278635	0.0145427	0.0125867	0.099655	0	0.0574785	0	0.0353519	0	0.0122313	0.0125576	0.013574	0	0	0
Mrpl9	22.6644	21.1074	22.5201	24.5676	23.2961	20.3367	20.1826	21.8116	22.9905	21.7056	24.1337	24.2359	24.1083	26.4853	24.5667
AK148617	1.32E-08	1.56E-09	0.0187445	8.98E-09	1.34E-08	0.0220243	0.0230381	4.67E-09	0.0385245	0.0362536	0.0372078	7.47E-09	9.91E-09	2.45E-09	1.52E-09
Esp16	0	0	0	0	0	0	0	0	0	0	0	0	0	0	0
Esp15	0	0	0	0	0	0	0	0	0	0	0	0	0	0	0
DQ695570	0	0	0	0	0	0	0	0	0	0	0	0	0	0	0
Esp18	0	0	0	0	0	0	0	0	0	0	0	0	0	0	0
AK137985	0.0821444	0.0600193	0.103894	0.0677912	0.0645775	0.0373198	0.0390673	0.0145901	0.0660218	0.056249	0.0725575	0.033613	0.0222904	0.0342027	0.0511423
AK172064	0	0.0592996	2.81E-09	0.00811403	0	0.0378276	0.0134771	0.0282097	0	0.0102568	0.0209768	0	0.021549	0	0.0296647
Gm2762	0.31056	0.464411	0.488801	0.373204	0.468043	0.516117	0.287195	0.25764	0.471864	0.474997	0.477519	0.263571	0.360499	0.212461	0.443878
Lrriq4	3.52E-09	0.0186512	0	0	0	0	0	0	0.0166222	0	0	0	0	0	0
Rabac1	132.197	122.697	106.215	128.838	118.174	109.731	133.893	110.478	116.053	110.829	116.809	135.385	146.555	148.074	105.431
4930455C13Rik	0.0708353	1.03E-238	7.04E-246	0.0760525	0.115062	0	0.166377	2.12E-165	0	0.0907412	0.0934888	1.47E-12	0	4.79E-193	6.85E-68
BC055324	0.173425	0.208881	0.296609	0.262469	0.232227	0.121755	0.201994	0.178278	0.190229	0.151697	0.182625	0.139556	0.281809	0.224979	0.297511
AK018924	0	8.97E-88	0	9.32E-198	8.28E-264	0	0	0	0	2.23E-188	0	1.27E-270	6.27E-198	0	4.02E-124
DQ546336	0	0	0	0	0	0	0	0	0	0	0	0	0	0	0
AK012046	0.743032	0.836067	0.822292	0.863592	0.66517	0.785544	0.721485	0.785245	0.863654	0.687201	0.902432	0.851323	0.688051	0.703836	0.922895
Gm15760	0.545549	0.616182	0.513182	0.495872	0.468648	0.621308	0.618017	0.508714	0.55951	0.537803	0.562192	0.553437	0.420984	0.559834	0.57458
Kcnj1	0	0	0	0	0	0	0	0	0.0117129	0	0	0	0	0	0
DQ554417	0	0	0	0	0	0	0	0	0	0	0	0	0	0	0
2610507B11Rik	43.9192	43.9238	45.1814	40.4312	44.17	46.1892	46.8829	44.9317	43.8214	43.3911	44.3152	41.88	41.4593	37.4451	43.8896
DQ546822	0	0	0	0	0	0	0	0	0	0	0	0	0	0	0
Msx1os	0.140059	0.200625	0.309617	0.279177	0.0552637	0.213217	0.0458935	0.0552268	0.344303	0.226375	0.116858	0.134492	0.180879	0.0880607	0.148819
DQ556304	0	0	0	0	0	0	0	0	0	0	0	0	0	0	0
2010001A14Rik	2.49953	3.22966	2.85351	3.71663	3.997	2.71378	3.28473	3.43481	2.57849	2.65975	2.90502	3.45417	4.12313	3.86305	2.92399
DQ556302	0	0	0	0	23.7805	0	0	0	0	0	0	0	0	0	0
Hira	15.5656	13.9283	14.2717	15.6766	14.5472	15.1087	17.14	15.0285	16.2353	15.149	14.7309	15.266	15.495	16.2116	16.4189
AK042353	0	0.0192737	0	0	0	0.0777361	0	0	0	0	0.0166429	0.0179899	0	0	0.016423
Gm19619	0.111119	0.0994572	0.110675	0.0596069	0.120575	0.171917	0.0770689	0.0690775	0.0633125	0.101574	0.0736128	0.0862018	0.0395755	0.131571	0.110474
Gpr75	3.38478	4.04743	3.60401	3.88403	3.64453	3.58789	3.54308	4.43369	3.50102	4.25273	3.24257	3.17281	3.06397	3.52869	4.39582
Mir344g	0	0	0	0	0	0	0	0	0	0	0	0	0	0	105.409
DQ688812	0	0	0	0	0	0	0	0	0	0	0	0	0	0	0
Mir344e	0	0	0	0	0	0	0	0	0	0	0	0	0	0	0
Mir344b	0	0	0	0	0	0	0	0	0	0	0	0	0	0	0
Mir344c	0	0	0	0	0	0	0	0	0	0	0	0	0	0	0
Wwox	7.48377	8.58473	7.64612	8.55673	6.27342	7.20365	7.86749	7.78006	7.6265	6.56978	6.77736	7.14525	7.70214	6.20999	8.18557
Mir344i	0	0	0	0	0	0	0	0	0	0	0	35.1806	0	0	0
6030408B16Rik	0.0417876	0.064118	0.0924903	0.0149439	0.0906877	0.0646514	0.115931	0.0259775	0.114285	0.0359514	0.110732	0.159593	0.0595315	0.0197916	0.127481
1700011A15Rik	0	0	0	0	0	0	0	0	0	0	0	0	0	0	0
Fgfr1op	3.18919	3.39861	3.44337	3.70443	3.10079	3.03497	1.96875	3.48477	3.8608	3.6161	3.04296	2.79375	3.27149	4.18485	3.46078
Ccdc33	0.151622	0.139689	0.132251	0.162667	0.164634	0.121097	0.0504765	0.226557	0.164269	0.296426	0.174272	0.101336	0.245192	0.207424	0.136285
AK032505	0.0586586	0.0770983	0.129946	0.0618113	0.123231	0.216668	0.0535695	0.0728486	0.130658	0.0586143	0.190328	0.0451883	0.101348	0.0483821	0.10876
AB339914	0	0	0	0	0	0	0	0	0	0	0	0	0	0	0
Csrnp2	6.57684	5.5947	6.21423	5.54945	6.00785	5.37646	5.29207	5.5584	5.88509	6.0417	4.81997	5.18021	5.59405	6.36112	6.26261
DQ713013	0	0	0	0	0	0	0	0	0	0	0	0	0	0	0
DQ713011	0	0	0	0	0	0	0	0	0	0	0	0	0	0	0
DQ713015	0	0	0	0	0	0	0	0	0	0	0	0	0	0	0
A630012P03Rik	0	0	0	0	0	0	0	0	0	0	0.0184027	0	0	0	0
DQ716622	0	0	0	0	0	0	0	0	0	0	0	0	0	0	0
DQ716625	0	0	0	0	0	0	0	0	0	0	0	0	0	0	0
AK044904	2.26E-53	4.62E-208	7.28E-50	1.61E-36	1.46E-08	1.66E-08	8.27E-59	1.13E-70	5.31E-08	7.25E-78	2.95E-37	3.74E-78	1.24E-41	0.037489	0.0306498
Gins2	1.06398	1.22638	1.25281	1.81294	1.10805	1.33441	1.63495	1.37512	1.31347	1.83565	1.6523	1.82317	1.83149	1.27307	1.36099
Gins3	0.950925	1.07511	0.886199	1.16935	0.923236	0.757117	0.925664	0.82968	0.775646	1.07647	1.03151	0.828286	0.887294	1.15361	1.03243
Gins1	0.547934	0.598186	0.332399	0.895108	0.803131	0.516335	0.55552	0.566817	0.353262	0.361962	0.626413	0.477962	0.774307	0.389178	0.462462
Gtf3c5	6.50044	5.9106	7.02723	6.44221	6.57812	6.52944	5.17057	6.6206	6.26055	6.00397	5.68546	6.67477	6.65247	7.45375	5.4782
Gins4	7.81169	10.1508	8.26544	10.5725	7.44278	8.5485	8.35162	7.65933	8.85836	8.85163	8.3305	9.15636	10.4652	8.66296	7.57003
DQ558651	0	0	0	0	0	0	0	0	0	0	0	0	0	0	0
Fbf1	11.2347	12.4225	11.75	12.3415	11.4233	11.118	9.64124	12.3409	10.8019	12.4448	10.955	12.4603	12.2999	12.5547	11.6004
DQ710660	0	0	0	0	0	0	0	0	0	0	0	0	0	0	0
Gm136	0	0	0	0	0	0	0	0	0	0	0	0	0	0	0
DQ710664	0	0	0	0	0	0	0	0	0	0	0	0	0	0	0
Pdzk1	2.83875	2.72993	3.55166	2.79631	3.3939	3.24356	2.9993	2.87427	2.97532	3.26125	3.27319	3.57058	2.79296	2.75341	3.24478
AA413626	0.185037	0	0.16382	0.264689	0.200784	0.572558	0.205339	0	0	0	0.163442	0	0	0.350552	0.161283
Asna1	62.5046	59.3394	54.9024	65.8148	59.0221	57.66	64.1797	57.3676	59.4891	55.648	54.8066	66.3504	69.9023	66.7247	61.2601
Tmem181c-ps	3.76655	4.23546	4.57215	4.28186	4.48251	3.83256	2.76879	4.64323	4.19216	4.28421	3.49426	2.76833	3.67872	4.68825	4.08183
DQ555454	0	0	0	0	0	0	0	0	0	0	0	0	0	0	0
Ccnb1ip1	0	0	0	0	0	0	0	0	0	0.024303	0	0	0.0268287	0.0267581	0
AK048477	0.0107564	0.00292563	0.0315294	0.00578875	0.0259492	0.00570203	0.0160842	0.00170076	0.00361376	0.00446714	0.033629	0.0132796	0.0168634	0.0285329	0.020361
Galk1	5.09791	5.32496	5.31009	5.90865	4.91189	5.66107	4.80354	3.44717	5.75154	5.54959	5.47276	4.94327	6.79808	5.22584	4.8333
Galk2	7.31819	7.94577	7.33147	8.26619	8.14864	7.88108	7.90752	8.72266	8.60452	8.37706	8.31362	8.1292	9.54464	9.13822	7.65067
AK041628	0.0458557	0.0703552	0.0811976	0.0333084	0.0995189	0.0945962	0.0643708	0.0427584	0.0836097	0.0887683	5.95E-05	0.0418172	0.108882	0.14117	6.95E-06
4930545H06Rik	0	0	0	0	0	0	0	0	0.0594342	0.0560896	0	0	0	0	0
9330133O14Rik	2.11134	1.69899	1.70725	1.43963	1.84809	1.62601	1.21835	1.29502	1.51416	1.58638	1.67844	1.82773	1.59082	1.74663	1.45997
Rbmx2	2.36955	2.47282	2.18261	2.60209	2.88287	2.07372	2.04519	2.32116	2.66203	2.55341	1.69132	2.5595	2.43233	2.78869	2.29485
Adprh	55.721	48.9101	48.1258	53.0361	50.84	49.4823	57.9513	50.0492	48.9466	48.927	49.3123	51.2888	58.3754	57.7157	48.9171
DQ710592	0	0	0	0	0	0	0	0	0	0	0	0	0	0	0
Adprm	5.90284	5.23488	5.73367	6.19623	5.08861	5.45627	5.41929	5.40337	5.23289	5.56103	4.73522	5.57	6.98977	6.63543	5.84318
DQ689856	0	0	0	0	0	0	0	0	0	0	0	0	0	0	0
DQ726245	0	0	0	0	0	0	0	0	0	0	0	0	0	0	0
AB343505	0	0	0	0	0	0	0	0	0	0	0	0	0	0	0
Cryz	6.46438	4.9929	6.00779	5.52441	4.82376	5.62607	5.45872	5.23996	5.6651	5.56209	4.93252	6.02882	6.61024	6.11033	5.43281
AB346759	0	0	0	0	0	0	0	0	0	0	0	0	0	0	0
BC023105	0.0241704	0.0247244	0.0106995	0.190162	0.0524548	0.17451	0.0402335	0.0300513	0.099156	0	0.320243	0.115388	0.470594	0.0686862	0.0842703
Crym	164.478	130.084	141.686	131.773	158.836	143.558	178.123	140.304	146.513	143.168	136.164	143.817	149.243	180.095	132.497
DQ720019	0	0	0	0	0	0	0	0	0	0	0	0	0	0	0
DQ727044	0	0	0	0	0	0	0	0	0	0	0	0	0	0	0
Aasdh	1.92665	1.97678	2.46787	2.41615	2.16723	2.02846	1.64668	2.3858	2.02929	2.3992	1.87851	1.45088	1.94515	1.87514	2.25569
4930444P10Rik	0.32319	0.330938	0.163449	0.132045	0.400916	0.285766	0.153865	0.287167	0.336825	0.357864	0.244724	0.0460568	0.219254	0.262677	0.120612
DQ567724	0	0	0	0	0	0	0	0	0	0	0	0	0	0	0
Lrwd1	3.28136	4.24322	3.33679	3.99537	4.18227	3.95103	2.86321	3.94423	3.97274	3.70224	3.23901	4.57386	4.36998	4.23941	3.82893
DQ562530	0	0	0	0	0	0	0	0	0	0	0	0	0	0	0
Toporsos	9.29461	9.69446	7.69797	11.9381	9.43493	5.66487	10.3144	10.9829	10.225	12.5569	9.79887	8.30182	11.6751	13.1151	6.01073
Kdm6a	6.96125	7.87845	7.39546	7.04878	6.44781	7.12469	6.33408	7.04571	7.18952	7.36755	7.02986	6.15316	7.48496	5.79568	6.27464
Hmga2-ps1	0.564099	0.778987	0.324622	0.64554	0.872251	0.741831	0.532092	0.736417	0.488541	0.400385	0.80968	0.646312	0.857203	0.627852	0.712941
Dnah7b	0.236565	0.32569	0.291992	0.242474	0.249348	0.344835	0.147323	0.379215	0.298184	0.277142	0.391043	0.208987	0.362777	0.348949	0.346798
Fem1b	29.2531	26.5727	29.6706	26.3379	26.5667	27.1806	32.9959	28.5093	27.6726	28.3588	24.9902	25.1385	25.0337	25.7117	28.9353
Fem1c	6.62824	6.0441	6.35827	6.23521	6.20132	6.75092	6.34198	6.5205	6.24439	7.14302	5.29243	5.62831	6.34773	4.94161	6.35629
Fem1a	9.73825	9.22629	9.5415	8.60678	9.98062	9.58748	10.1483	8.65821	9.76654	9.88316	8.99293	9.56655	9.17216	9.46465	8.98583
Ces3b	0	0	0	0	0	0	0	0	0	0	0	0	0	0	0
Ces3a	0	0	0	0	0	0	0.0239862	0.0268738	0	0	0	0	0	0	0
AB340975	0	0	0	0	0	0	0	0	0	0	0	0	0	0	0
Cry2	33.5175	31.2222	31.6683	30.5766	32.5726	32.3128	34.8273	30.7594	33.4363	28.5438	28.9396	30.669	32.1132	33.8741	35.2817
Rhox3e	0	0	0	0	0	0	0	0	0	0	0	0	0	0	0
Rhox3f	0	0	0	0	0	0	0	0	0	0	0	0	0	0	0
Rhox3g	0	0	0	0	0	0	0	0	0	0	0	0	0	0	0
Rhox3a	0	0	0	0	0	0	0	0	0	0	0	0	0	0	0
Rhox3c	0	0	0	0	0	0	0	0	0	0	0	0	0	0	0
Rhox3h	0	0	0	0	0	0	0	0	0	0	0	0	0	0	0
Nus1	21.0918	20.4987	21.5562	21.5079	20.0851	20.7888	20.4526	21.2272	22.393	22.4607	21.3925	21.4102	21.6549	23.1566	22.2309
Pcgf1	4.39825	6.41115	5.74355	6.7241	6.80089	6.18096	4.88081	6.28865	6.11465	7.4451	6.26447	6.1416	6.57914	6.87429	6.03797
4930549G23Rik	0.175708	0.312934	0.142508	5.78E-11	0.384447	0.176534	1.22E-12	5.15E-08	0.303082	2.58E-12	1.34E-12	0.146858	0.163777	8.50E-10	0.28926
Pcgf3	11.2861	9.69245	11.5136	9.80572	9.53554	9.00387	10.9568	10.7039	11.6741	11.3092	9.20322	8.38625	9.91915	10.0088	11.5702
Pcgf2	3.93458	4.41428	4.75563	4.36932	4.11175	3.97404	3.53031	4.85479	4.40393	3.44984	3.46688	3.95011	4.41295	4.53977	4.199
Pcgf5	3.4435	4.1534	3.38178	5.24818	3.67532	4.40195	3.32012	3.67401	3.52079	3.7133	3.19014	3.57678	4.04761	3.02381	4.21425
Pcgf6	3.82628	4.5306	4.58712	4.47939	4.20844	3.79735	2.53319	4.52608	4.49561	3.92641	3.90159	2.98554	3.88144	5.49205	4.609
Ccndbp1	26.8133	25.0278	24.1948	27.3312	27.1951	25.5457	25.5781	25.959	24.5719	23.6928	24.9685	25.9384	28.7872	30.6767	25.7427
Bend6	37.3711	36.068	31.8327	40.0146	34.8961	33.682	36.1376	34.0106	33.4533	34.1097	30.5087	36.7412	38.5508	36.7695	38.628
Bend7	0.437219	0.290755	0.510258	0.435864	0.488675	0.434484	0.470379	0.362348	0.398753	0.54714	0.466893	0.328829	0.427454	0.526982	0.315249
Bend4	1.50088	1.38961	1.69301	1.39127	1.42771	1.57263	1.70257	1.67116	1.61151	1.79667	1.46881	1.38868	1.34533	1.43168	1.79471
Bend5	2.43058	2.424	3.45487	2.5821	2.73694	2.67214	2.25497	2.65753	2.56966	2.13883	2.29134	2.65293	2.82654	2.27294	2.63237
Bend3	1.15959	1.19584	0.976414	0.996156	1.19331	1.36504	1.22388	1.09697	1.0284	1.05457	1.22187	1.02292	1.05344	0.970074	1.04369
DQ692983	0	0	0	0	0	0	0	0	0	0	0	0	0	0	0
Sfi1	3.74429	14.9361	8.50645	15.7846	13.6808	14.1781	4.81226	13.6676	12.1474	7.81039	11.7659	10.2617	10.0286	11.6178	13.3546
DQ686502	0	0	0	0	0	0	0	0	0	0	0	0	0	0	0
DQ686506	0	0	0	0	0	0	0	0	0	0	0	0	0	0	0
AB345223	0	0	0	0	0	0	0	0	0	0	0	0	0	0	0
AK082366	0	0.0564493	0	0	0	0	0	0	0.0251541	0	0	0	0	0	0
4933430M04Rik	0	0	0	0.0488789	0	0	0.0758378	0	0	0	0.060364	0.0652499	0	0	0
AB345229	0	0	0	0	0	0	0	0	0	0	0	0	0	0	0
AB348416	0	0	0	0	0	0	0	0	0	0	0	0	0	0	0
Olfr1349	0	0.150718	0	0.0351279	0.106587	0	0	0	0	0.0422544	0	0.0468932	0	0.0930461	0.0856178
Olfr1348	0	0.0256324	0.0221849	0.0657154	0	0	0	0	0.0228439	0	0.0221336	0	0	0.0474725	0
Gdi2	79.0806	79.407	73.376	80.4916	77.0361	77.342	86.2042	79.3485	76.728	74.4857	77.5866	78.6824	83.318	84.6171	75.5216
Olfr1344	0.676766	0.445035	0.513571	0.51862	0.576998	0.648176	0.429153	0.240408	0.440689	0.291123	0.469686	0.692321	0.73458	0.641066	0.379213
Olfr1347	0.024362	0.0249204	0.0215686	0.0290409	0.0528707	0	0	0	0.066628	0.0419191	0.0215188	0	0	0.0923076	0
Ptprz1	42.3901	37.0394	37.8012	38.8555	37.7189	38.651	48.323	40.4408	35.7218	37.3594	38.0302	35.4703	38.7809	31.4333	37.5617
Olfr1341	0	0	0	0	0	0	0	0	0	0	0	0	0	0	0
Olfr1340	0	0	0	0	0	0	0	0	0	0	0	0	0	0	0
Olfr1342	0	0	0.043833	0.0354112	0	0	0	0	0	0.0851904	0	0.0472714	0	0	0
AK217388	13.7908	44.9958	24.9353	20.6755	34.5567	23.3719	37.8257	38.1047	21.1725	21.8904	22.6005	35.8564	28.8333	31.3407	3.47E-47
H2-Ab1	1.70632	1.44877	1.79005	5.1987	2.44232	9.53184	2.06566	3.1687	5.56074	3.03105	67.1968	4.37532	120.47	1.88789	0.64966
Gm9866	13.9498	10.8475	12.1459	11.8101	12.0969	11.135	12.5722	11.8527	12.8651	12.8641	11.1284	12.0846	12.6411	11.8593	11.7772
AK087460	0.00125377	0	0.0096201	0.0233152	0	0	0	0.0299146	0	0.00116855	0.00159965	0	0.012556	0.0012866	0
Plekho2	2.97199	2.69149	1.86665	3.12029	3.44993	3.5575	2.98889	2.49978	2.57911	2.42013	2.99906	2.93191	3.93473	2.31926	2.41337
Plekho1	13.9645	15.163	12.7294	17.1545	14.7387	15.7157	10.5546	13.6445	15.0794	12.3973	15.8188	15.2768	19.2143	16.934	14.1681
Mir7080	0.000209333	118.212	2.94E-05	0	403.531	0.00110568	15.9145	60.7893	0	0.000168366	0.000470182	0	0.000273649	0.00288481	6.21E-05
Cpt2	2.64339	2.68641	3.2065	3.00784	2.62622	3.55857	2.83817	2.83839	3.41129	3.8248	3.13845	3.72025	3.73323	2.7641	2.72297
DQ561373	0	0	0	0	0	0	0	0	0	0	0	0	0	0	0
Tmem241	1.50406	1.13874	1.27836	1.54937	1.44439	1.1666	1.76294	1.15205	1.47183	1.36063	1.3944	1.54684	1.80009	1.39748	1.43314
DQ692361	0	0	0	0	0	0	0	0	0	0	0	0	0	0	0
DQ692365	0	0	0	0	0	0	0	0	0	0	0	0	0	0	0
Fcho1	11.557	12.7905	12.7118	12.9798	11.9381	11.1579	8.83217	11.9579	11.9267	12.9567	9.4783	10.774	12.9736	12.3895	12.5398
Bean1	2.88924	2.80353	2.44845	2.54558	2.39495	2.17326	2.57333	2.66534	2.56662	2.37951	2.16864	2.84205	2.83883	2.37222	2.70226
AK080857	0.415574	0.641786	0.448949	0.533175	0.739194	0.570733	0.533117	0.425032	1.01085	0.659481	0.612152	0.46188	0.467389	0.743113	0.938025
Pa2g4	22.4189	20.6242	19.9874	21.2437	21.286	21.4353	20.4387	22.488	20.9278	22.5451	21.2482	23.3785	23.7733	23.5306	20.5929
Prpf8	33.652	35.2957	37.3941	29.5378	32.4952	37.221	37.2796	35.0302	35.21	33.8057	31.484	32.3165	31.3503	27.8562	35.1736
Trbv13-1	0	0	0	0	0	0	0	0.484493	0	0	0.223114	0	0	0.245939	0
Prpf3	4.79604	5.14266	5.29874	6.48833	5.04917	4.74094	3.96342	6.46806	5.1641	5.20697	5.08205	5.2566	5.60763	6.17043	5.89484
Prpf4	3.30814	3.48128	3.62862	3.62765	3.37524	3.29887	3.15941	3.61256	3.28271	3.6269	3.43276	3.32627	3.58677	3.63972	3.50863
Prpf6	19.5872	19.8247	20.4378	20.2336	18.9485	20.5062	20.6434	19.839	21.3002	20.8844	18.7871	19.2774	20.37	22.2495	19.9925
AK155714	0	0	0	0	0	0	0	0	0	0	0	0	0	0	0
AK155710	0.00737784	6.42E-10	6.54E-11	0.00522852	1.42E-10	0.000770844	5.09E-10	0	0.01342	2.14E-10	0.0194407	0.00118111	1.14E-11	1.49E-10	8.32E-12
DQ724923	0	0	0	0	0	0	0	0	0	0	0	0	0	0	0
Ninl	1.16031	1.26397	1.02726	0.926889	1.12007	1.08798	0.869555	1.3021	1.06465	0.829717	0.898442	1.13662	0.887323	0.970632	1.07046
DQ707673	0	0	0	0	0	0	0	0	0	0	0	0	0	0	0
Hdac7	2.64513	3.40528	2.84533	3.65745	3.37606	4.07174	2.07966	2.96224	3.15592	3.12732	3.49482	2.82437	3.35461	3.57298	3.19523
DQ707675	0	0	0	0	0	0	0	0	0	0	0	0	0	0	0
Mical1	2.3904	2.25695	1.89644	2.24408	2.7405	2.93092	2.29879	2.13069	2.19846	1.87869	2.46679	2.16096	2.79934	2.06377	2.11789
Mical2	98.7627	102.911	109.944	92.3457	106.295	100.42	85.4975	101.051	100.235	111.13	96.0942	102.614	84.1029	92.9117	107.171
Gmcl1	6.97731	6.76591	6.70097	7.02887	6.56454	6.62808	5.80339	6.8029	6.65491	6.87029	6.4005	6.5078	6.85651	7.64074	7.25339
Gm904	0	0	0	0	0	0	0.091857	0	0	0	0	0	0	0	0
Uso1	39.0007	38.6685	41.4469	38.1005	36.1246	38.5039	37.9123	34.8867	38.604	40.3614	41.7371	38.3125	40.6968	41.8594	36.7739
Gm906	0	0	0	0	0	0	0	0.0077677	0.0113911	0	0.00551846	0	0.0118673	0	0
AK081104	0	0	0	0.0734892	0.111493	0	0	0	0.0468347	0.132598	0	0	0.0487926	0	0.0447792
Abhd16b	0.0468946	0	0.0207588	0.0167703	0	0	0	0.0291523	0	0	0	0	0	0	0
Abhd16a	26.5108	28.893	28.3412	28.7523	28.8817	26.8202	26.2145	26.5425	26.8878	25.1745	25.3043	27.1908	32.5934	31.9264	27.3122
Frk	0.112314	0.118788	0.0828577	0.0876501	0.0665258	0.12611	0.145432	0.0762262	0.189047	0.160913	0.0952466	0.190274	0.131021	0.0532434	0.0534386
Acox3	6.00039	7.06776	5.47593	6.6814	6.46883	6.56593	6.33713	6.49228	6.86262	5.94244	6.20811	6.42525	7.96157	6.83779	6.75904
Acox1	60.4782	58.7446	56.9462	59.3896	56.5741	56.887	62.0973	55.9215	53.721	56.7599	56.9294	57.9257	57.4021	58.5226	54.3312
AK080275	1.40332	1.16588	1.14578	1.50207	1.07207	1.45346	1.34287	1.07888	1.26653	1.5641	1.16182	1.25666	1.19029	0.934998	1.26054
DQ684838	0	0	0	0	0	0	0	99.9943	0	0	0	0	0	0	0
Pnmal2	142.682	117.006	132.029	116.824	122.69	123.395	136.711	122.656	123.201	131.78	113.487	123.841	124.457	139.429	128.722
Pnmal1	60.4324	55.872	61.5077	56.1743	56.4116	53.3138	58.9591	56.3907	54.9339	59.2151	51.3391	57.0123	53.7862	56.0916	57.3725
DQ693201	0	0	0	0	0	0	0	0	0	0	0	0	0	0	0
DQ560024	0	0	0	0	0	0	0	0	0	0	0	0	0	0	0
DQ560022	0	0	0	0	0	0	0	0	0	0	0	0	0	0	0
Sdhaf1	13.759	10.9631	11.412	12.396	12.4154	11.5523	11.572	12.3048	12.5432	12.2527	11.8121	12.5837	14.1221	13.2618	11.4877
Sdhaf2	11.4477	11.9101	11.189	13.4124	12.0096	11.546	10.2583	12.7079	12.1747	11.6827	11.6918	11.9921	12.2543	13.201	11.9171
Sdhaf3	11.604	10.3453	11.216	11.6498	11.8984	11.3099	9.33297	13.6332	9.2199	13.0058	10.0616	12.5023	10.3131	9.6809	12.9909
Sdhaf4	20.9236	20.6707	18.0314	21.9073	24.4308	19.1194	22.7778	19.4861	19.0747	22.2449	21.5736	23.5476	25.0101	27.8834	19.347
4930527G23Rik	0	0	0	0	0	0	0	0	0	0	0	0	0	0	0
DQ725030	0	0	0	0	0	0	0	0	0	0	0	0	0	0	0
Btbd19	2.13398	1.86052	1.85417	2.24813	2.09011	2.22201	1.89327	2.07027	2.31139	2.07794	2.47637	2.23332	2.48156	2.43528	1.82014
Btbd18	0.00555427	0.0113631	0	0	0.0120539	0	0.0123273	0.0138113	0.0303809	0	0.0147181	0.0106063	0	0.0210451	0.0145237
DQ725036	0	0	0	0	0	0	0	0	0	0	0	0	0	0	0
Zscan25	5.02591	5.83499	5.6416	5.76467	5.89969	4.98242	4.72187	5.1242	5.41568	5.22586	5.59234	5.70143	5.53738	5.6759	4.86443
Btbd17	5.49302	5.09203	5.10409	5.82152	4.61033	5.13132	5.59318	4.88299	4.76904	4.98661	3.62622	5.46163	5.70711	4.99428	4.82404
Btbd16	0.386678	0.174985	0.259953	0.220232	0.358882	0.211729	0.441624	0.353033	0.155949	0.279143	0.151102	0.242424	0.196949	0.322868	0.26402
Btbd11	6.39224	6.28194	5.61288	5.69985	4.99054	5.79365	6.3577	5.7181	5.51851	5.2829	5.19901	5.14716	5.20196	5.67651	6.69487
Zscan21	6.12028	5.51166	5.12983	6.25718	6.05234	5.1346	5.48389	6.07711	6.11866	5.5408	5.4282	5.50072	6.25326	5.6495	5.43629
Zscan22	3.96653	4.37331	4.29462	4.13549	4.34169	4.40647	4.67451	4.18911	3.97379	3.91929	4.23928	4.73323	4.09776	4.1032	4.57275
Lmf2	5.46272	5.1803	5.08949	5.96824	5.32898	5.35636	5.22536	5.02315	4.9437	5.69183	5.19227	5.40562	5.81681	5.47527	4.73379
Lmf1	7.47557	7.16658	7.59861	7.87317	7.28476	7.84484	6.83305	6.25622	7.55725	7.01615	7.33694	7.56359	7.94485	7.33946	7.00867
Acoxl	0.0277274	0.0283629	0.0368222	0.0198316	0.0300871	0	0.0307696	0	0.0126387	0.0596372	0.0122457	0	0.013167	0.0262647	0
1700037C18Rik	2.19301	2.10973	1.71174	1.94718	2.23798	1.94469	1.73945	1.53856	2.25622	2.37879	2.31695	2.04797	2.70317	2.69605	2.01342
DQ563616	0	0	0	0	0	0	0	0	0	0	0	0	0	0	0
Tmco1	4.99364	5.72373	5.44845	6.05412	5.5791	5.4307	5.06527	5.3295	5.33095	5.52778	5.39591	5.88131	5.50729	6.03684	4.8201
Tmco2	0.0715245	0	0	0.0511567	0	0	0	0.0889271	0	0	0.0631771	0	0	0.0677515	0
Tmco3	8.05768	7.7476	7.71472	8.7341	8.19303	7.98136	8.46373	8.33473	7.86576	8.65914	8.2457	8.26728	8.63245	8.03624	7.97687
Tmco4	0.875273	0.973098	0.949247	0.929469	1.03939	1.4233	0.996002	1.2248	0.98168	0.929129	1.05064	1.21586	1.29211	0.951212	0.663545
Tmco5	0.478948	0.044536	0.192739	0.404841	0.75593	0.449078	0.773083	1.13682	0.357238	0.412054	0.423049	0.332574	0.661643	0.070993	0.531315
Tmco6	3.32733	3.4908	3.83349	4.2689	4.21092	4.03586	2.84273	4.58545	3.81697	4.44419	3.77301	3.33745	4.52383	4.89976	4.32621
Zmat1	3.37582	3.21377	3.22169	3.42054	3.53261	3.16336	2.54127	3.33175	3.30183	3.30691	3.25047	2.87714	3.47814	3.20622	3.51815
DQ706101	0	0	0	0	0	0	0	0	0	0	0	0	0	0	0
Zmat2	63.4983	55.7033	58.0839	53.9372	61.9321	59.1185	58.6081	56.8854	54.3379	56.0268	61.476	65.3212	62.446	67.1255	57.8803
Zmat5	66.2781	69.6067	71.0335	70.632	69.1454	67.7744	71.4465	69.9139	68.3415	64.7946	81.0898	74.4698	76.8944	88.5767	72.1982
Zmat4	12.9656	15.2384	14.5716	15.4403	12.3643	14.8028	12.8191	13.9831	14.9118	15.1778	11.7054	14.1705	13.4991	13.726	16.2469
Ankrd45	12.1321	13.9949	13.7436	13.8956	12.4376	11.9088	9.75761	13.34	12.4056	14.4452	12.1123	12.473	12.2482	11.2541	14.7808
Ankrd44	1.29695	1.35842	1.47239	1.46931	1.2207	1.47213	1.19823	1.42734	1.40864	1.4575	1.40743	1.25016	1.63255	1.20502	1.37927
Ankrd46	102.831	96.9624	95.7771	96.151	98.8142	90.9336	99.5342	95.0978	93.0728	95.3567	94.3318	93.686	99.8073	103.271	94.7156
Pom121	16.6854	15.1831	16.0555	12.9476	13.1374	14.1203	15.4907	14.3213	15.2301	15.2823	13.6035	13.7784	13.4163	13.9456	15.1744
Ankrd40	36.5461	38.822	34.5831	42.003	37.7229	35.3298	40.5594	36.6353	35.2646	36.2365	37.334	37.7678	40.6475	37.1126	37.4028
1810062O18Rik	1.02431	0.543623	0.37723	0.472795	0.644335	0.507392	0.284748	0.316221	0.484796	0.600788	0.15988	0.986722	0.295769	0.241153	0.145886
AB351862	0	0	0	0	0	0	0	0	0	0	0	0	0	0	0
AB349653	0	0	0	0	0	0	0	0	0	0	0	0	0	0	0
Ankrd49	4.38091	4.26114	4.60817	4.83495	4.59049	4.63658	3.37331	4.61495	4.40013	4.08792	4.28204	4.69858	4.49017	4.7932	4.01851
DQ724078	0	0	0	0	0	0	0	0	0	0	0	0	0	0	0
mKIAA0208	6.13E-20	0.0617216	0.044271	0.0407353	0.0293946	0.0157786	0.0152048	0.019585	0.0554187	0.0147406	0.0394837	0.0132695	3.69E-29	6.15E-19	0.0145203
Cyb561d1	4.37301	4.42658	4.59327	4.57394	4.66148	4.3595	4.25478	4.66413	4.5773	4.28404	4.07987	4.59089	4.5212	5.04063	5.01853
Cyb561d2	5.58181	4.84401	4.71557	5.78331	6.11829	5.18072	5.05714	5.83016	4.22526	5.78703	5.60119	6.12217	5.8625	6.28168	5.28342
D030024E09Rik	0	0	0	0	0	0	0	0	0	0	0	0	0	0	0
Rnf167	34.5785	35.3893	34.4178	33.7047	36.1524	34.1214	36.0835	36.7451	33.0488	34.2842	35.5006	35.6081	34.7295	36.1557	33.5615
Rnf166	34.4009	47.2061	27.6272	38.8403	41.2822	25.551	28.9655	25.7094	26.048	43.3646	28.2599	41.6025	45.9884	42.3068	33.6381
Rnf165	12.9727	12.0506	16.3849	12.9988	12.1891	12.5317	14.7427	13.3136	14.5798	15.0243	13.17	12.0609	12.3829	13.7078	14.0566
Rnf169	5.674	5.14289	5.47368	4.53946	4.84617	4.77038	5.09719	5.07848	5.08569	4.97726	4.84802	4.54236	4.73979	4.80761	5.28732
Rnf168	9.02056	8.65744	8.46887	8.66819	8.04856	8.0763	7.79124	9.1459	8.76158	8.81066	7.50939	8.57028	9.02525	8.99883	8.42466
Eaf1	4.47704	5.02162	4.59595	5.26223	4.6304	4.7678	4.47035	4.82024	4.91035	5.66571	4.97967	4.49858	5.43418	5.09314	5.07626
Eaf2	0.451235	0.439644	0.220791	0.25708	0.230516	0.229929	0.216902	0.249544	0.404908	0.201445	0.377832	0.317797	0.338063	0.283002	0.327702
AK183986	308.391	309.392	294.032	419.934	341.071	391.487	342.226	272.822	394.678	372.468	293.353	311.434	411.178	224.71	284.309
Rad51d	3.40404	3.59402	3.17344	3.54958	3.6642	3.40993	3.43297	3.33447	3.99866	3.54682	3.21702	3.89055	3.72913	3.30468	3.60335
Rad51c	0.750108	1.06874	0.711534	0.794916	0.712201	0.497366	0.847271	0.666152	0.805939	0.898874	0.662871	0.920819	0.852352	0.875486	0.969046
Rad51b	0.0890828	0.0455623	0.0788684	0.12743	0.024166	0.160795	0.0247142	0.0830681	0.14212	0.0766412	0.236059	0.276429	0.211516	0.0449324	0.077647
Olfr1101	0	0	0	0	0	0	0	0	0	0	0	0	0	0	0
DQ699883	0	0	0	0	0	0	0	0	0	0	0	0	0	0	0
Zfp235	4.51304	4.43666	4.44427	5.05368	4.79652	4.38305	3.61555	4.23811	5.10957	4.76073	4.24074	4.68246	4.41488	4.8692	4.69482
Zfp236	4.91949	4.91086	5.74676	4.99119	4.84516	5.24195	4.90105	5.60421	5.61628	5.44645	5.08248	4.72536	4.92084	4.96636	5.66104
Zfp239	18.0088	16.548	13.8569	13.7797	17.7244	15.9604	13.9956	17.0821	18.9925	16.838	14.0152	12.9222	17.4126	18.0398	15.5919
Fibin	2.52814	0.929373	1.36394	1.86472	1.02873	2.03718	1.22741	1.76808	2.12469	1.73324	1.46546	1.82923	2.23227	1.10384	0.877994
Olfr259	0	0	0	0	0	0	0	0	0	0	0	0	0	0	0
Wdr20rt	1.26469	1.11784	1.35883	1.18558	1.19912	1.02582	1.07643	1.31288	1.25368	1.52117	1.03033	1.04338	1.27111	0.988622	1.07023
Mir7648	0	4.15E-53	0	0	0	0	0	0	0	0	0	0	0	0	0
DQ540068	0	0	0	0	0	0	0	0	0	0	0	0	0	0	0
Alg8	2.02935	2.13876	2.15962	2.16986	1.73495	2.38913	1.70606	2.11533	2.72833	2.36317	1.90115	2.0746	2.47249	2.27181	2.10831
Alg9	8.53239	7.06463	6.5822	6.91768	6.61219	7.92642	8.24333	6.40331	7.81121	8.13795	7.38836	7.73305	7.45113	7.0765	7.64389
Hal	0	0	0.0380391	0	0	0.014772	0.0158932	0	0.0130564	0	0.0126504	0	0	0.0135664	0
FW313009	0	0	0	0	0	0	0	0	0	0	0	0	0	0	0
Alg2	55.312	47.2884	50.0907	47.8779	50.2894	49.1078	57.538	48.0152	50.6482	50.8216	48.0007	46.0755	50.9863	53.8751	48.2789
Alg3	7.21554	5.16222	5.56942	6.37148	6.51677	6.89235	6.6866	7.17886	6.77321	6.06595	5.37468	6.47383	5.71887	6.57127	5.79808
Alg1	11.5588	13.4927	10.7193	13.1982	12.1739	12.1628	12.9413	12.0517	12.8639	11.1308	12.481	13.6597	13.9775	14.5006	12.1887
Alg6	1.82597	2.50495	2.23624	2.46834	2.30759	2.73732	1.93851	2.6476	2.35309	2.63899	2.43407	2.32525	2.72104	2.40112	2.50641
Mir7646	5.21915	4.36579	2.98674	4.22687	3.68686	3.07631	3.20513	3.63854	4.04991	4.04865	3.96943	2.38068	3.65395	6.4139	4.14137
Alg5	7.62927	7.49394	7.49074	9.80069	7.52997	7.65843	7.4388	8.33845	7.03986	7.92336	8.29341	8.57906	8.73277	9.42266	7.6348
1700012P22Rik	0	0.147186	0	0	0.156134	0.0989404	0	0.178898	0	0.0412641	0.127096	0	0.0911051	0	0
Wif1	0.415765	0.49504	0.320044	0.529122	0.255065	0.352026	0.472972	0.459931	0.649126	0.404307	0.702888	0.46206	0.45935	0.496523	0.252068
Hephl1	0.00728415	0	0	0	0	0	0	0	0.0066405	0	0.0128681	0	0	0	0
DQ718451	0	0	0	0	0	0	0	0	0	0	0	0	0	0	0
Hif1an	7.1752	7.988	7.90517	7.77713	7.79919	8.13697	7.64831	7.91106	8.25781	7.50194	7.7619	7.60283	7.77312	7.37377	8.26548
Rabl6	46.5298	44.3566	45.0349	46.1298	45.2854	42.1872	43.1423	45.4218	41.0559	45.731	41.5452	46.8818	42.3306	41.395	44.885
1600002K03Rik	2.47215	2.5288	2.62642	4.59722	3.48729	2.54984	2.19471	2.35646	3.75617	3.403	3.34823	2.91112	3.20882	3.59066	3.23218
Olfr1105	0	0	0	0	0	0	0	0	0	0	0	0	0	0	0
Rabl3	3.56607	2.6091	2.53366	2.21234	3.0896	2.64717	2.88659	2.64848	2.16991	2.95956	2.61565	2.75015	2.24641	3.55376	2.66319
DQ697079	0	0	0	0	0	0	0	0	0	0	0	0	0	0	0
Pacrgl	2.89289	2.75032	3.05386	3.09031	3.26372	2.56222	3.9255	3.05251	2.79725	3.16772	2.89194	2.87491	3.27613	3.29307	2.64974
DQ697070	0	0	0	0	0	0	0	0	0	0	0	0	0	0	0
Kdf1	0.0480508	0.172048	0.212988	0.189042	0.0782136	0.0991285	0.026658	0.179167	0.131371	0.123978	0.0636672	0.114705	0.159741	0.0910155	0.125658
Slc16a14	1.8375	2.31877	2.59985	2.03891	2.12432	2.44434	1.65796	1.81485	2.70839	2.12752	1.66855	1.55766	1.85933	1.28509	2.09557
AK019237	0.329805	0.575426	0.161022	0.632024	0.237243	1.07248	1.32E-06	0.233637	0.769398	0.183829	0.295854	4.23E-07	0.528932	0.318107	0.280738
Trav9n-2	0	0.0796934	0.0103462	0.073235	0.126807	0.0482138	0	0.140452	0.0121755	0.0275768	0.057805	0.095957	0.0769525	0.0303626	0.0271626
Slc16a11	2.82637	3.57086	2.57182	4.93533	3.84648	3.42373	1.48714	3.93669	3.80997	3.33212	3.37297	2.9182	4.42715	4.13909	2.96708
Slc16a10	0.440602	0.693724	0.425459	0.521078	0.65679	0.578212	0.377559	0.543374	0.608205	0.597104	0.495118	0.536419	0.610817	0.39095	0.484896
Slc16a13	1.69597	1.31329	1.50151	1.21301	1.54792	1.61849	0.949818	1.71448	1.63281	1.62274	1.58204	1.45282	1.71612	1.65155	1.09142
Slc16a12	0.512447	0.781148	0.871794	1.1283	0.599671	1.22293	0.590972	0.899478	1.30074	1.31399	1.24254	1.14165	1.02111	0.590112	0.437904
AK031468	0.156923	0.10959	0.145774	0.278884	0.2505	0.180753	0.0126165	0.151273	0.119806	0.164963	0.17315	0.0676861	0.176794	0.125194	0.182525
AK015566	5.43E-83	0.0530588	5.10E-116	2.39E-94	0.0569594	0.0532339	6.42E-91	9.21E-78	2.24E-107	5.70E-102	5.96E-91	8.27E-92	5.25E-127	2.80E-125	0.0922859
Pcna	27.522	28.5096	25.8795	30.9117	26.7227	25.6886	26.4772	28.8406	27.1889	25.0587	26.2819	29.1752	31.2409	33.3395	25.2355
Ppp2r2cos	0	0.0292773	0.0253395	0.0204709	0	0	0	0.0355852	0.0521846	0	0	0.0273272	0	0	0.0498942
4930598F16Rik	0	0	0	0	0	0	0	0	0	0	0	0	0	0	0
Pcnp	21.3866	24.8554	22.4977	26.1477	24.4482	24.4221	21.0609	25.8041	25.3628	24.8777	23.5734	22.8959	26.5609	24.7488	27.1816
Hipk1	20.5285	21.2578	21.419	20.1549	19.851	21.228	23.4014	20.1145	21.5537	21.0114	20.6054	20.0359	19.2995	16.8965	20.7368
B130034C11Rik	0.466844	0.461512	0.528458	0.558038	0.319407	0.455717	0.386075	0.46682	0.501831	0.970681	0.575191	0.692857	0.649331	0.631327	0.617696
Pcnt	4.06057	5.37345	4.58549	4.2119	4.24784	4.55252	3.67824	4.36506	4.57601	4.30155	3.98289	5.18362	3.96562	3.74918	5.22093
Hipk4	16.2775	17.4749	18.587	15.0004	17.1722	16.3662	13.9523	16.6723	16.9563	15.8694	17.5235	15.9382	14.1505	15.8474	17.6185
Pcnx	17.7046	19.1102	22.0753	15.972	18.6541	19.5604	26.4613	18.6261	22.78	20.384	22.5136	20.3507	17.0968	17.3499	22.6296
AK083197	21.2589	17.4993	19.0486	18.2455	17.4966	16.7969	22.2795	17.9726	18.0489	18.9252	20.4625	17.9769	19.117	18.3354	17.8986
Clcn1	0.160086	0.163599	0.269204	0.272055	0.20838	0.231039	0.159885	0.278651	0.21863	0.22033	0.226224	0.168088	0.150181	0.197042	0.209303
B9d1	7.54456	7.71747	8.53178	10.9283	7.91145	8.4356	6.68379	8.67079	7.57147	7.85449	7.72807	8.4141	11.26	9.24851	7.57073
Clcn6	21.4787	21.9457	21.1892	20.2216	20.9348	21.4597	24.8405	20.5137	21.6472	21.3325	19.8634	21.1955	19.7661	20.3946	22.5839
Fam103a1	35.083	36.598	33.8694	37.8873	37.6424	34.5337	35.3944	37.9647	35.2336	36.5136	33.9246	37.637	38.9882	42.5494	37.2034
Guk1	81.5324	72.5445	68.5585	83.6716	82.4104	74.8134	88.4355	78.6214	73.1314	70.7297	76.034	85.0534	91.0808	88.4941	77.6256
Clcn4	52.3136	48.7576	50.2768	48.2206	48.6456	48.2406	51.3375	49.0262	48.7294	49.6851	46.9992	49.6513	49.5308	48.7054	49.5783
9530036O11Rik	0.0543068	0.0830568	0.0533068	0.18486	0.0743021	0.0299099	0.0150174	0.117777	0.0248601	0.0360921	0.0483887	0.117139	0.0540885	0.054711	0.0720831
AK142908	0	0.00796789	0	0	0.00845227	0	0	0	0	0.00670148	0.0137606	0	0	0	0.00678942
Inmt	0.404785	1.05816	0.637105	1.31891	0.878468	0.927794	0.549018	0.335515	0.697033	0.696503	0.873996	0.858851	0.811604	0.724261	0.274417
Gm14092	0.0228793	0	0.0202559	0.0327281	0.0744794	0	0.0507792	0	0	0.0196839	0.0202092	0	0	0	0
H2-Q8	0.367592	1.47486	0.400611	3.26089	0.774157	1.8242	1.86775	1.07492	1.50173	0.234868	7.70149	2.29087	11.3092	1.33759	0.767213
H2-Q5	0.474426	0.987739	0.625033	1.41983	0.837319	1.5306	0.751016	0.817728	0.823477	0.423612	4.68128	1.01039	4.74564	1.03282	0.622488
H2-Q4	1.73974	3.11499	1.86945	5.17078	3.60839	7.81229	2.9998	3.10955	3.27846	2.19917	16.3294	3.95183	15.6846	3.04144	2.06045
H2-Q7	0.830365	1.63917	1.06901	2.2546	1.46757	3.61664	1.81789	1.4467	1.73351	0.694944	10.7293	1.63748	13.2502	1.54644	0.997459
H2-Q6	0.610244	0.968411	0.602126	0.00031007	1.81468	2.84517	0.000972146	1.07158	0.172049	0.60834	3.47757	0.0649996	2.72643	0.599474	0.814599
H2-Q1	0.60782	0.811966	0.493076	1.44877	0.868733	1.70645	0.68118	1.26352	1.29386	0.562644	3.04227	1.25862	3.33164	0.598599	0.538869
H2-Q2	0.572889	0.323165	0.400438	0.597211	0.385873	0.463588	0.41648	0.397534	0.477492	0.362558	1.60657	0.680766	1.64209	0.350284	0.342636
Ankar	0	0	0.00873574	0	0	0.0050883	0	0	0	0.00848905	0	0	0	0.00467302	0
Traf3ip2	0.663959	0.721624	0.74703	0.999237	0.690444	0.984437	0.767506	0.825506	0.706171	0.761637	1.1485	0.818836	0.880203	0.681345	0.759574
Traf3ip1	3.91777	3.81471	4.23321	3.94601	3.82157	3.46654	2.70367	3.69685	4.20728	3.7596	3.95862	3.62802	4.06553	4.47291	4.56499
Lpxn	0.65196	0.795152	0.510604	1.05815	0.789072	0.75004	0.667837	1.1847	0.731508	0.625624	1.30678	0.933722	1.73852	1.06887	0.852397
DQ706926	0	0	0	0	0	0	0	0	0	0	0	0	0	0	0
Sms	34.6895	33.8841	34.2205	31.8133	34.9239	32.5891	34.7064	35.2538	35.2774	35.3618	33.7602	32.4678	32.777	38.6201	34.9726
DQ723314	0	0	0	0	0	0	0	0	0	0	0	0	0	0	0
DQ703343	0	0	0	0	0	0	0	0	0	0	0	0	0	0	0
DQ703340	0	0	0	0	0	0	0	0	0	0	0	0	0	0	0
Rpia	3.80887	4.18033	3.81265	3.87046	4.17724	3.50035	3.12836	3.37605	3.98183	4.13548	3.52336	3.52458	4.40465	4.63385	3.53311
Dnajc28	4.19299	5.23364	5.20894	5.24082	4.63219	3.70088	4.79357	5.55665	4.57005	5.5176	3.7213	4.67558	4.5944	4.66878	5.27963
Dnajc27	34.7705	33.1218	33.3157	32.7348	30.5236	31.2428	36.5566	30.0037	32.8431	32.6607	27.7535	32.0969	31.5084	27.8044	32.3242
Dnajc25	1.19351	1.65922	1.50718	1.57478	1.19871	1.63024	0.909763	1.30125	1.61222	1.72797	1.40509	1.43047	1.58163	1.60689	1.40848
Dnajc24	3.68298	4.87626	3.94429	5.7516	4.82541	5.80984	4.89373	3.91218	3.55952	4.75046	4.7037	4.33898	3.76595	5.65083	4.79134
Dnajc22	0.0292811	0	0.0259237	0.0209428	0.0635461	0	0	0	0.0266938	0	0	0.0559144	0.0278097	0.055473	0
Dnajc21	7.91169	10.0945	10.2076	10.0539	10.7131	9.81334	7.64929	11.1114	11.1073	10.8629	11.205	11.603	11.0876	11.4312	12.8671
AK028798	0	0	0	0	0	0	0	0	0	0	0	0	0	0	0
Mtmr9	26.1394	24.8579	26.3383	24.2782	23.3404	24.7716	26.9672	25.5174	24.561	27.1187	21.4944	21.8458	23.556	18.4121	24.9252
Mtmr7	17.3865	16.3341	16.0289	15.2784	14.8587	16.1463	14.8533	14.789	15.9698	16.3851	13.2879	16.0703	15.5338	14.4621	16.2848
Mtmr6	40.1288	38.2586	36.8724	38.8485	37.352	35.2014	38.3458	40.6297	38.5629	39.3146	36.6993	35.3892	40.0692	35.7811	38.3832
Mtmr4	16.203	15.6097	19.0069	17.1049	16.3437	15.4383	18.3904	19.1273	19.9791	17.9447	15.784	17.2829	17.0143	18.1031	19.8242
Mtmr3	18.702	18.6704	19.5882	18.431	18.9697	19.2682	18.6971	18.7122	19.4779	19.1349	17.9616	18.1416	19.2019	18.5954	19.8803
Mtmr2	14.6112	14.9554	14.9424	17.0648	14.1214	13.0006	13.2003	15.1991	14.2882	15.7479	12.8272	14.4767	12.1254	14.8253	14.1379
Mtmr1	9.73469	10.9866	10.9052	10.5522	10.2075	9.83706	9.96763	10.651	11.1894	11.2148	10.6153	10.1997	10.2343	10.8914	11.2479
Cars	9.14552	9.61917	9.56923	9.81551	9.58571	8.62854	7.48308	9.62026	9.62976	9.40656	9.61546	10.6595	8.95057	9.93492	10.0751
Abcb11	0.00784741	0.00802726	0	0	0.0170361	0	0.0087084	0.00975675	0	0.0135072	0.00693156	0.00749259	0.00745306	0	0.020529
2410015M20Rik	45.459	44.5861	43.2651	51.5439	45.9183	44.1296	48.592	39.3975	44.1237	40.893	45.5862	52.3396	59.873	52.7497	43.1777
Carf	2.88101	3.08265	2.85551	2.6887	2.55091	2.41761	1.90856	2.79876	2.41192	3.11771	2.57104	2.29025	2.52355	2.7997	2.3361
Plppr4	69.7327	57.5869	70.5829	52.5708	62.5727	64.2138	62.5255	60.6867	65.3886	71.2069	60.0673	55.547	57.05	63.7009	64.1028
Plppr5	13.6151	11.4354	12.9578	11.9711	12.2277	11.3463	11.2654	12.1336	11.9425	13.3866	11.8179	10.3081	11.3646	12.4345	12.7531
Plppr1	3.78402	2.01968	3.06599	2.13628	2.14009	1.95414	2.50458	2.15329	2.07014	2.94081	1.92496	1.97373	2.57618	2.36836	1.97173
Plppr2	104.592	83.2395	89.3048	76.2463	90.4024	85.358	105.355	90.6403	86.2846	94.6358	87.2949	82.9142	87.4125	103.772	84.3681
Plppr3	13.5714	11.7529	11.8437	12.5488	11.8201	11.5474	11.1094	11.788	11.1851	11.2308	8.88457	10.5878	12.6253	13.1944	11.9541
Fbxl12os	0.601821	1.00944	0.59346	0.736432	0.743295	0.906879	0.53422	0.76954	0.655694	0.844705	0.597491	0.544633	0.584163	0.762415	0.658635
Otop1	0.0252703	0.0258495	0.0111807	0.0361569	0	0	0.0140144	0.0314188	0.0115129	0.021741	0.0558185	0.0241278	0.0240005	0	0.0220263
Abcb1b	1.46215	1.81871	1.37426	1.76461	1.75101	1.98119	1.243	1.53115	1.30628	1.49123	2.23387	1.63493	1.59511	1.0815	1.19641
Car8	1.11149	1.06185	0.863539	2.33813	1.36262	0.685098	0.779694	0.615225	0.64813	0.995658	0.548375	0.774412	1.11269	0.703484	0.682234
Otop2	0.146171	0.0747587	0.0485272	0.0522719	0.198267	0.0753807	0.0608259	0.0443884	0.0832831	0.0785964	0.0484178	0.0348881	0.104118	0.0346127	0.0955539
Scarf2	0.897398	0.774217	0.673561	1.30127	0.767699	1.22957	0.651408	0.802962	1.10353	0.882743	0.944298	1.10392	1.36798	0.809278	0.509099
Scarf1	0.779125	0.640715	0.58163	0.854413	0.712863	0.727832	0.474725	0.716425	0.770218	0.854541	0.816975	0.831952	1.00113	0.709116	0.673798
Car2	93.599	129.148	89.7962	138.735	127.75	112.735	115.905	121.455	114.675	114.675	114.207	118.372	133.343	140.824	112.172
Car3	0.166803	0.0284377	0.0279931	0.238606	0.276228	0.0286742	0.0925521	0.241952	0.228096	0.358767	0.098224	0.0796306	0.105614	0.184338	0.0726949
Car1	0.0751428	0.0384148	0	0	0.0407501	0	0.0416745	0	0.0342358	0.0323092	0.0331713	0.0358562	0.035667	0.0711789	0.0327332
Car6	0	0.0323393	0	0.0226119	0	0.0326083	0	0	0	0	0.0837817	0	0	0	0
Car7	5.953	7.45288	5.21529	5.5057	6.03445	5.99133	3.98588	5.4201	5.36929	4.92867	5.44783	5.28709	3.74841	6.09978	6.33029
Car4	25.106	20.2838	23.3878	20.4807	25.018	22.4285	20.8115	20.35	21.0186	26.3995	21.9978	22.8798	22.1845	23.1449	21.4729
Gm6938	0	0.066454	0	0.139396	0.0704938	0.134014	0	0.0807717	0.0592246	0.0558918	0	0.124055	0	0.123076	0
AK047263	1.73E-95	4.21E-146	1.02E-101	5.86E-143	6.12E-59	4.92E-116	4.09E-121	6.67E-137	0.0245452	2.75E-87	1.70E-76	0.0265469	1.75E-85	2.85E-79	1.87E-48
Pgk2	0	0	0	0	0	0	0	0	0	0	0	0	0	0	0
Gm6936	0	0	0	0	0	0	0	0	0.0273459	0	0.0529913	0	0	0.0284141	0
Pgk1	183.997	178.904	178.833	187.674	181.458	174.017	180.896	176.892	177.423	186.52	177.597	194.781	190.042	199.228	175.043
Snora33	0	0	9.23E-10	5.91E-06	0	2.19E-08	0	0	5.45803	0	1.29E-08	4.08E-05	1.81E-05	1.62327	0
Snora31	12.3168	25.1982	10.9046	44.047	13.365	25.4079	13.6682	30.6273	22.457	0	10.8794	0	11.6979	11.6671	0
Snora30	29.9703	15.3286	26.5338	10.7179	0	15.4561	0	18.6312	54.6441	25.7845	66.1814	100.153	14.2321	14.1947	13.0615
Snora35	0	0	0	0	0	0	0	0	0	0	0	0	0	0	0
Snora34	28.303	8.6855	7.51731	12.1459	9.2135	8.75776	0	17.5947	5.16041	9.74004	9.99993	5.40466	10.7523	21.448	22.2027
8030462N17Rik	10.7054	10.2776	11.9948	12.9562	9.04421	11.5581	12.3754	12.7897	11.9843	12.8107	8.87414	10.998	11.3838	8.16526	12.5105
Fgfr1op2	31.8373	35.3288	34.3384	39.3706	35.8675	32.4286	32.6029	35.7436	36.1275	35.9577	34.1036	34.8045	34.5574	36.7119	35.5147
Ppip5k2	3.96736	3.88344	3.83573	5.11112	4.76159	3.82655	3.32066	3.50785	4.88185	4.05166	3.58369	2.95179	3.45894	4.4264	3.52478
Ppip5k1	25.4392	24.8033	25.419	25.0069	21.7114	23.1504	19.2937	26.3837	25.6107	22.8541	20.3765	19.7223	19.1455	24.0197	24.1561
Pigyl	59.7188	45.6965	62.1723	61.9906	77.3328	58.1192	45.5946	62.89	46.6115	58.3318	46.7307	77.5935	73.1611	73.5829	52.9088
DQ707330	0	0	0	0	0	0	0	0	0	0	0	0	0	0	0
Zfp646	4.03899	4.63757	4.53468	4.17388	4.2646	4.58714	3.8667	4.88496	4.41931	4.62541	4.73131	4.55826	4.48739	3.75562	4.72676
Lss	4.3467	4.21273	3.56826	4.55957	4.40874	4.26175	4.20448	4.26063	4.33132	4.11758	3.6695	3.82425	4.66015	4.01132	4.05804
DQ701476	0	0	0	0	0	0	0	0	0	0	0	0	0	0	0
Sco1	1.70845	1.87958	1.74536	1.83062	1.89654	1.87544	1.67995	1.89693	1.87767	1.84733	1.64069	1.82987	1.86351	1.77591	1.6913
Kars	31.4163	30.5712	28.1051	30.1307	29.4918	27.8126	31.9339	30.5605	28.3904	28.849	28.0672	31.5291	32.8689	31.0186	30.6843
Dpy19l2	0.113796	0.128045	0.181347	0.138365	0.148177	0.12911	0.075769	0.226375	0.0933669	0.215387	0.140722	0.097786	0.205348	0.183249	0.109107
AK142297	0	0	0.0140117	0	0	0	0	0	0.00210407	0	0	0	0	0	0
Dpy19l4	4.58676	5.29962	4.38749	5.25044	3.96832	5.0157	5.03881	4.31628	4.57813	4.74229	4.56456	3.87134	4.37966	3.11274	4.52498
Ccdc47	32.4858	33.9359	34.7708	33.0406	33.0484	33.0623	30.0072	33.2776	34.3467	34.449	35.96	33.6159	34.2385	33.6374	32.7211
Krtap6-5	0	0	0	0	0	0	0	0	0	0	0	0	0	0	0
Ccdc43	8.25859	7.86594	10.36	9.75152	10.2107	8.48511	8.08679	10.3896	9.77746	10.3315	9.15498	9.5372	9.66646	11.316	10.1178
Krtap6-2	0	0	0	0	0	0	0	0	0	0	0	0	0	0	0
Krtap6-1	0	0	0	0	0	0	0	0	0	0	0	0	0	0	0
Ccdc40	0.524579	0.435213	0.596106	0.480027	0.544105	0.39784	0.299642	0.460405	0.374376	0.672763	0.598195	0.353546	0.476235	0.414116	0.282154
Actl6a	4.25751	4.95284	3.80628	4.97069	4.34808	4.24063	3.65927	4.38521	4.52818	4.41701	4.23992	4.34398	5.25266	4.58645	4.12934
Actl6b	42.0705	40.5863	41.1775	41.6068	43.4798	38.9875	39.3869	42.0157	40.252	40.0186	39.0489	38.7334	43.106	47.6657	41.5909
Mannr	0.0598467	0	0	0	0.0324699	0.0308638	0	0	0	0	0	0	0	0.0283449	0.0521639
Mbp	884.056	1468.55	879.091	1623.82	1397.2	1152.5	1089.22	1222.82	1162.49	982.002	1318.2	1422.81	1421.55	1345.43	1056.33
Gm4794	0	0	0	0	0	0	0	0	0	0	0	0	0	0	0
Gm4792	0	0	0	0.138906	0	0	0.0718394	0.160976	0	0.0556953	0	0.0618097	0.122967	0.122644	0
1700054M17Rik	0	0.156341	0	0	0.331691	0	0	0	0	0	0	0.291856	0	0	0.133218
Mir344h-2	0	0	0	0	0	0	0	0	0	0	0	0	0	0	0
DQ687613	0	0	0	0	0	0	0	0	0	0	0	0	0	0	0
Mylip	5.41205	5.87561	5.81128	5.86841	5.79928	6.79072	5.46454	6.42314	5.88482	5.15168	5.9139	5.94188	7.25126	5.52751	6.05402
Xpnpep1	16.4955	15.4879	16.5092	15.2002	17.1338	16.5771	16.0001	16.6702	16.8154	15.8465	15.5542	16.1169	16.2311	17.0726	15.6604
Xpnpep2	0.0782773	0.0457542	0.0990032	0.071983	0.0849389	0.0692033	0.0868656	0.12513	0.0305821	0.12507	0.0790194	0.074738	0.0849645	0.127112	0.0584814
Xpnpep3	2.80967	2.66264	3.23616	2.91562	2.86428	2.79308	2.68343	3.23284	2.70009	3.21248	2.69761	2.61065	2.33282	1.7976	2.83655
4732416N19Rik	0.378784	1.02324	0.242964	1.82837	0.706778	9.12E-05	1.64083	1.40E-159	1.11159	1.26984	1.21652	2.20726	0.381745	0.717913	0.336304
Tmem259	38.4433	39.2378	37.516	38.4791	42.507	39.0724	35.3998	36.6569	40.3707	41.5496	34.4307	37.2542	38.2196	44.9773	38.793
Tmem258	58	52.9978	51.4228	67.0876	52.5719	58.5803	49.2754	58.2031	51.7767	57.4511	59.2881	60.985	70.4505	62.1083	56.1792
Tmem256	68.7452	70.874	56.96	82.0125	75.1826	74.1693	73.1065	73.5687	69.8204	70.7773	75.8907	90.1927	93.0301	86.0736	70.0089
Tmem253	0.140438	0.186209	0.345497	0.230245	0.117215	0	0.21055	0.277062	0.28607	0.402987	0.0753813	0.210984	0.147138	0.363984	0.295578
Tmem252	0.823213	1.07171	0.467857	1.50662	1.54984	1.17927	0.75274	1.00856	1.15937	0.776137	2.40821	1.171	2.18242	0.35365	0.504568
Tmem251	7.01153	8.23057	7.68265	8.01945	7.67235	7.25393	7.22836	8.42851	7.19538	8.31704	7.38957	9.03852	8.3971	10.0283	8.96838
AB251193	0	0	0	0	0	0	0	0	0	0	0	0	0	0	0
Gm5771	0	0	0	0	0	0	0	0	0	0	0	0	0	0	0
Gm5779	0.484676	0.647645	0.429102	0.618029	0.404327	0.432353	0.557235	0.350528	0.375327	0.579864	0.543816	0.537804	0.713288	0.570783	0.426262
Mterf1a	1.14346	1.20409	1.70812	1.30837	1.81496	1.37443	1.23072	1.45711	1.09241	1.83592	1.47116	1.05241	1.42202	1.59654	1.18243
Mterf1b	0.815462	0.869594	1.28643	1.28758	1.13672	1.10042	0.846176	1.06575	1.04768	1.30922	1.24518	0.823698	0.742748	1.45817	1.14118
Adh6b	0	0	0	0.0161633	0	0	0	0	0.0206017	0	0	0	0	0	0
Adh6a	0	0	0	0	0	0	0	0	0	0	0	0	0	0	0
AK133303	0	0	0	0.00904437	0.027443	0.0130428	0	0	0.011528	0	0	0	0	0	0
DQ693219	0	0	0	0	0	0	0	0	0	0	0	0	0	0	0
Mars2	3.61756	3.53163	3.54374	3.56136	3.49259	3.49007	3.05283	3.24932	3.04711	3.69218	3.03742	3.11254	3.27901	2.55376	3.21311
Vmn1r187	0	0	0	0	0	0	0	0	0	0	0	0	0	0	0
Vmn1r185	0	0	0	0	0	0	0	0	0	0	0	0	0	0	0
4930474N05Rik	0	0	0	0	0	0	0	0	0	0	0	0	0	0	0
Vmn1r183	0	0	0	0	0	0	0	0	0	0	0	0	0	0	0
Vmn1r181	0	0	0	0	0	0	0	0	0	0	0	0	0	0	0
Vmn1r180	0	0	0	0	0	0	0	0	0	0	0	0	0	0	0
Dnal4	32.0327	27.6798	29.8459	27.9261	28.9307	31.0816	30.7419	28.4185	28.9844	29.693	28.9675	30.1334	31.0786	30.974	26.6997
Fam178b	0.157583	0.107502	0.139514	0.187916	0.170994	0.108396	0.174936	0.32666	0.143711	0.0903673	0.0928283	0.250855	0.0998125	0.0497747	0.183205
Vmn1r189	0	0	0	0	0	0	0	0	0	0	0	0	0	0	0
Vmn1r188	0	0	0	0	0	0	0	0	0	0	0	0	0	0	0
AK076817	0.074868	0	0	0	0	0	0	0	0	0	0	0	0	0	0.0652569
C1s1	0.176955	0.396842	0.174742	0.501409	0.339726	0.638826	0.317219	0.583891	0.514998	0.404045	1.52704	0.461399	5.28048	0.328802	0.249159
C1s2	0.0299722	0.114972	0.0331694	0.0911078	0.11383	0.0695569	0.049891	0.0652133	0.116126	0.109591	0.225031	0.0786968	0.91803	0.134858	0.0653114
Znrd1as	1.64402	2.7813	2.8526	3.23376	2.37858	3.09647	2.78804	3.05978	2.23726	2.79386	2.88324	2.84697	2.53447	2.79861	2.85658
2900076A07Rik	0.96043	2.08046	1.70061	2.30324	2.26824	2.0395	0.877722	2.31798	2.42068	2.77051	1.94619	1.45642	2.46821	2.4082	2.11746
Olfr1467	0	0	0	0	0	0	0	0	0	0	0	0	0	0	0
Olfr1461	0	0	0	0	0	0	0	0	0	0	0	0	0	0	0
Arfip1	5.87687	6.34316	6.46565	6.77836	6.23198	7.1537	6.41962	6.69461	7.16735	7.68582	7.00514	6.02352	7.09736	6.94729	5.84908
Arfip2	25.3463	22.8958	21.6067	22.9585	22.1461	21.9904	22.3952	23.0601	23.2838	23.3748	21.2845	24.3286	23.4978	25.1184	22.7546
9230009I02Rik	0.155753	0.0796612	0.172367	0.0835497	0.0845039	0.160648	0.0432104	0.0968244	0.106493	0.0669999	0.137575	0.0743553	0.147926	0.147537	0.203637
AK040808	0.0191713	0.0415751	0.00313079	0.00275545	0.0260199	0.0112264	0.00725267	0.0279481	0.0213235	0.00747391	0.072265	0.0217137	0.0451708	0.0600553	0.0407159
Vmn1r238	0	0	0	0	0	0	0	0	0	0	0	0	0	0	0
1700016H13Rik	0	0	0	0	0	0	0	0	0	0	0	0	0	0	0
Vmn1r235	0	0	0	0	0	0	0	0	0	0	0	0	0	0	0
Vmn1r234	0	0	0	0	0	0	0	0	0	0	0	0	0	0	0
Vmn1r237	0	0	0	0	0	0	0	0	0	0	0	0	0	0	0
Vmn1r236	0	0	0	0	0	0	0	0	0	0	0	0	0	0	0
Vmn1r231	0	0	0	0	0	0	0	0	0	0	0	0	0	0	0
Vmn1r230	0	0	0	0	0	0	0	0	0	0	0	0	0	0	0
Vmn1r233	0	0	0	0	0	0	0	0	0	0	0	0	0	0	0
Vmn1r232	0	0	0	0	0	0	0	0	0	0	0	0	0	0	0
DQ556975	0	0	0	0	0	0	0	0	0	0	0	0	0	0	0
DQ556974	0	0	0	0	0	0	0	0	0	0	0	0	0	0	0
DQ556976	0	0	0	0	0	0	0	0	0	0	0	0	0	0	0
Os9	34.2522	33.7676	32.1827	33.1225	32.8237	33.3338	33.3262	33.4524	33.37	31.4406	32.8948	35.1157	36.66	34.9399	30.4787
AK143659	0.0581025	0.118766	0.102725	0.0971373	0.126199	0.105105	0.0646094	0.132483	0.110544	0.133426	0.102614	0.0739062	0.0875581	0.105258	0.0760291
DQ705209	0	0	0	0	0	0	0	0	0	0	0	0	0	0	0
DQ705208	0	0	0	0	0	0	0	0	0	0	0	0	0	0	0
DQ714381	0	0	0	0	0	0	0	0	0	0	0	0	0	0	0
DQ705200	0	0	0	0	0	0	0	0	0	0	0	0	0	0	0
Dpep1	0.0384679	0.236112	0.111905	0.154992	0.0783741	0.0991968	0.0640344	0.119574	0.227962	0.198584	0.0849499	0.20202	0.0913412	0.200425	0.0167635
Dpep2	0	0	0.0272209	0	0	0	0	0.0382273	0	0	0.162192	0.0587136	0	0.0291245	0.0191913
Dpep3	0	0	0	0	0	0	0	0	0	0	0	0	0	0	0
AK049600	4.57196	5.99407	5.92157	5.6125	5.54258	5.54412	4.29929	5.91898	5.47489	5.22491	5.98899	5.06598	4.32362	5.88428	6.05834
Hyou1	33.8797	29.307	31.761	32.5501	30.9491	30.2129	31.5501	30.6022	30.3992	34.876	32.157	32.5989	30.8131	33.3671	30.9839
BC115668	4.11135	3.60565	3.42095	3.85191	3.0764	2.12713	4.57475	6.08941	2.85563	3.42779	3.7045	2.02428	6.85676	3.67323	0.826637
Sult1a1	4.86748	4.85468	5.80592	7.0654	4.07943	5.205	4.05124	7.44317	8.06927	3.98123	7.16638	8.19737	6.62206	5.55724	4.41155
Ushbp1	1.79307	1.47437	1.3311	1.96767	1.2614	1.19663	0.822032	1.38021	1.16539	1.66695	1.55495	0.767546	1.65122	1.25682	1.04096
Gm6150	0	0	0	0	0.0143987	0	0	0	0.0241938	0.0114161	0	0	0.0378078	0.0125694	0
Crocc2	0.0713876	0.203423	0.0948031	0.164117	0.171525	0.0946686	0.0226343	0.120456	0.102268	0.236895	0.13512	0.0486856	0.164658	0.111093	0.0622232
Osm	0.0216299	0.0442513	0.0382996	0.108293	0.0938828	0.111549	0.0720093	0.0537854	0.0788746	0.037218	0.210161	0.0826077	0.267059	0.0409778	0.113119
Snap25	844.453	980.345	914.758	977.725	1014.09	848.923	815.825	918.372	954.535	934.355	869.533	1024.79	937.59	1013.07	1080.9
AK163900	0.178498	0.301314	0.539589	0.288766	0.231172	0.510925	0.0995677	0.32926	0.359412	0.211873	0.324979	0.265207	0.344076	0.272744	0.387698
EF651833	0.337624	0.3708	0.33863	0.372354	0.384523	0.276683	0.248246	0.286925	0.325263	0.30017	0.317033	0.351461	0.430484	0.254364	0.365187
Avpr2	0	0.0385497	0.0396683	0.0540431	0	0.0379177	0.0419251	0.0603799	0	0.0474419	0.0487078	0.01755	0.0174574	0.0174115	0.0656962
EF651838	0.548991	0.495015	0.175014	0.493353	0.67669	0.235684	0.357311	0.27663	0.460453	0.271388	0.587918	0.155377	0.352543	0.172514	0.719772
EF651839	0.74751	0.704925	0.551949	0.801893	0.640414	0.561751	0.32784	0.485022	0.725822	0.394808	0.685102	0.399251	0.536648	0.66397	0.674222
Sh3bp5l	13.2443	12.8813	13.5828	13.2768	13.1867	11.8647	12.3316	12.8228	13.469	14.202	11.8965	13.5562	13.3766	14.2466	12.8878
4930525C09Rik	0	0	0	0.100554	0.0845028	0.145005	0.156012	0	0.128164	0	0	0	0	0.0737673	0
DQ544586	0	0	0	0	0	0	0	0	0	0	0	0	0	0	0
4430402I18Rik	1.78582	1.81643	1.11433	1.76929	2.18199	1.99999	1.85556	1.23953	1.72984	1.84633	1.93419	1.34853	2.32465	1.32226	1.69445
DQ555274	0	0	0	0	0	0	0	0	0	0	0	0	0	0	0
DQ555273	0	0	0	0	0	0	0	0	0	0	0	0	0	0	0
AK137533	0.00769339	0.0015024	0.000756805	0.00875408	0.00075892	0.0165917	0.0029105	0	0.00136375	0	0.0151955	0.00882877	0.00172521	0.00295406	0.00153674
AK172459	0.0817187	0.0441907	3.07E-07	0.0161582	0.011309	7.59E-06	5.92E-11	5.34E-07	0.0304567	0.0348598	1.82E-07	0.0458494	0.041138	0.0415107	0.0520363
DQ704154	0	0	0	0	0	0	0	0	0	0	0	0	0	0	0
DQ704153	0	0	0	0	0	0	0	0	0	0	0	0	0	0	0
AK172452	0	0	0	0	0	0.0223228	0	0	0	0	0	0	0	0	0
Dpf2	10.9046	11.7022	12.1241	13.0321	11.9017	10.7658	9.25398	12.3053	11.1666	11.7072	10.9862	11.7457	11.5737	13.4034	12.2991
Dpf3	3.01918	2.93348	2.85262	2.42279	2.93129	2.29695	2.63055	3.18224	2.28914	3.67644	2.91454	2.21202	3.20194	2.27651	2.55858
Olfr1346	0	0	0	0	0	0	0	0	0	0	0	0	0	0	0
Dpf1	16.7306	13.4745	15.7819	15.2797	15.4146	14.0873	15.4456	15.3471	15.989	16.2582	15.2121	15.1093	16.7277	19.3979	14.7067
DQ546987	0	0	0	0	0	0	0	0	0	0	0	0	0	0	0
Olfr311	0	0	0	0	0	0	0	0	0	0	0	0	0	0	0
Phyhd1	3.87625	10.6372	7.2262	10.6472	8.10131	8.75649	5.55461	8.00228	9.45142	6.5917	12.1023	8.41444	10.4397	9.01718	7.34134
Mir3470b	0	0	0	1.3509	2.04949	1.94811	0	0	0	0	0	0	0	0	0
AK043723	0.633516	0.632988	0.52155	0.637647	0.465185	0.605162	0.225225	0.577915	0.678403	0.688755	0.824014	0.310387	0.742873	0.492315	0.606628
AK135975	0	0	0	0.00782249	0	0.0594881	0	0.0147937	0	0	0.194105	0	0.199054	0	0.0105043
Mir28a	0	0	0	0	0	0	0	0	0	0	0	0	0	0	0
E530011L22Rik	1.66262	1.78626	1.83052	1.87884	1.78016	1.76143	1.29593	1.7981	1.88794	1.96086	1.3696	1.71467	1.88161	2.10493	1.63614
Faap100	3.94212	3.24734	3.59983	3.42868	3.39961	3.69134	3.65735	3.70746	3.8197	3.64806	2.89913	3.08069	4.40979	3.65971	3.05487
Mir28c	0	0	0	0	0	0	0	0	0	0	0	0	0	0	0
Use1	51.5328	50.8281	42.1404	57.3286	45.7615	48.4672	55.1937	52.4679	47.3609	43.5784	50.0205	52.5775	62.3206	58.1577	45.1593
Egln3	1.71364	1.92059	1.27968	2.0996	1.47141	2.02878	1.43864	1.96384	1.61656	1.65379	1.89535	2.09144	2.58989	1.72205	1.61055
Egln2	34.1685	32.9157	33.0627	33.857	33.9355	30.866	32.3711	33.1389	31.5326	32.9543	31.6888	36.002	36.5477	37.0441	33.4655
Egln1	24.4537	23.6749	21.4812	25.2194	24.7169	23.2196	27.4691	22.4762	24.9919	24.3698	24.8633	25.5568	24.4613	25.4549	23.3115
Wnt10a	1.69818	2.48769	1.55914	2.06931	1.63795	1.60018	1.55878	1.90283	1.98771	1.65941	1.20369	2.16186	1.69249	1.92634	2.50351
Wnt10b	0.175647	0.154123	0.112967	0.0781515	0.222716	0.0432675	0.194779	0.0935916	0.160126	0.107806	0.178087	0.0600846	0.237575	0.23727	0.131356
DQ543008	0	0	0	0	0	0	0	0	0	0	0	0	0	0	0
Apeh	5.95104	6.08835	6.1899	6.16803	5.95815	6.28901	5.21483	5.3041	6.63327	6.81064	6.3824	6.46479	7.63089	6.12658	5.96044
DQ695300	0	0	0	0	0	0	0	0	0	0	0	0	0	0	0
Olfr43	0	0	0	0	0	0	0	0	0	0	0	0	0	0	0
DQ699812	0	0	0	0	0	0	0	0	0	0	0	0	0	0	0
DQ713738	0	0.0197174	0.0170655	0	0	0	0	0	0	0	0.0170261	0.023842	0	0	0.0168012
Olfr834	0	0	0	0	0	0	0	0	0	0	0	0	0	0	0
AK028960	2.57E-15	2.31E-08	2.45E-20	3.29E-52	1.39E-17	4.76E-24	4.38E-218	1.82E-06	5.32E-05	9.75E-27	2.90E-26	1.29E-22	1.60E-07	8.06E-14	3.63E-25
Mcf2	0.754348	1.17663	1.08212	1.40584	0.726314	0.988739	0.931435	0.977516	1.06544	1.17002	0.778926	1.22746	1.22099	0.986289	1.09277
Olfr830	0	0	0	0	0	0	0	0	0	0	0	0	0	0	0
EF651829	0.394301	0.407534	0.459508	0.446459	0.472271	0.31302	0.219425	0.29965	0.321224	0.300567	0.374993	0.28284	0.443056	0.326567	0.348767
EG629133	0.0350206	0.0262656	0.0474389	0.0178404	0.0139237	0.0488565	0.0137019	0.00963763	0.0257932	0.0138381	0.00825299	0.0249788	0.0246103	0.0148689	0.0182787
Odf3b	0.793129	1.75784	0.897217	1.56014	1.43004	1.03872	0.635651	1.96546	0.819183	1.53107	0.739479	1.13217	1.55269	0.974601	0.729701
Gbe1	2.40809	2.90992	2.81139	3.21757	3.04375	3.31625	2.39332	3.04335	3.58245	3.25564	2.73478	2.9056	2.85257	2.79493	2.44494
C130074G19Rik	6.04892	5.50479	4.16116	4.02802	5.44712	5.65099	5.03059	5.41143	5.07073	5.35963	4.10242	6.05424	6.57698	4.32043	4.96939
DQ554606	0	0	0	0	0	0	0	0	0	0	0	0	0	0	0
BC100303	6.74E-08	3.81E-08	5.75E-06	4.64E-06	0.0695383	5.72E-06	1.46E-07	0.00494513	1.72E-10	1.06E-08	0.21135	8.68E-08	0.311059	1.93E-06	5.55E-06
Gm10408	0.16185	0.172788	0.158253	0.181925	0.172164	0.173995	0.171859	0.204424	0.177367	0.245056	0.161844	0.216622	0.174888	0.227733	0.202239
Gm10409	0.336571	0.316349	0.327724	0.365956	0.316549	0.400809	0.234167	0.311468	0.2496	0.327985	0.281934	0.316115	0.364244	0.356441	0.300864
Cyp3a44	0	0	0	0	0	0	0	0	0	0	0	0	0	0	0
Krt33b	0	0	0	0	0	0	0	0	0	0	0	0.0255412	0.0254064	0	0.0077722
Krt33a	0	0	0	0	0	0	0.0138567	0	0	0	0	0.0476884	0	0	0
Gm10406	0.489864	0.390463	0.428581	0.333749	0.307401	0.349967	0.289158	0.223698	0.32526	0.390509	0.274427	0.356273	0.365591	0.420406	0.283331
AK006653	0	0	0	0	0	0	0	0	0	0	0	0	0	0	0
DQ719573	0	0	0	0	0	0	0	0	0	0	0	0	0	0	0
Fdft1	20.3226	19.2761	15.8256	20.0696	20.8362	19.4608	20.8348	19.6539	17.0569	15.8969	17.415	20.7112	22.0867	21.1789	20.1806
Clasrp	5.82289	10.7485	8.77882	11.3192	12.9956	8.93839	3.83226	10.2555	9.6807	9.75988	8.1226	5.64879	8.50818	12.3604	9.02503
DQ556119	0	0	0	0	0	0	0	0	0	0	0	0	0	0	0
DQ542353	0	0	0	0	0	0	0	0	0	0	0	0	0	0	0
DQ542355	0	0	0	0	0	0	0	0	0	0	0	0	0	0	0
AK087209	0	0	0.0678002	0.0273867	0.0415492	0.078988	0.0424917	0	0.0349071	0.0329428	0	0.0365593	0.0363664	0.145083	0.0333751
Jkamp	18.6777	17.6509	19.2145	20.959	20.0806	18.5305	17.5551	18.9875	20.4822	20.4133	17.5507	20.5163	19.4041	20.7689	18.8213
Ska3	0.378034	0.348211	0.336305	0.439104	0.448763	0.351141	0.318111	0.605149	0.492841	0.369936	0.553885	0.395349	0.629589	0.408722	0.42426
Ska2	4.19009	4.62138	4.62776	5.09709	5.20771	3.87101	4.14333	4.8978	5.33325	5.31639	5.07316	3.91428	5.10639	5.15818	4.85765
DQ719574	0	0	0	0	0	0	0	0	0	0	0	0	0	0	0
DQ564818	0	0	0	0	0	0	0	0	0	0	0	0	0	0	0
Gdpgp1	3.25104	3.45233	3.47711	3.14436	2.98508	2.84772	3.46724	3.54079	2.58512	3.04644	2.63308	2.87933	3.26643	2.85699	3.95461
AK207408	0.0114513	3.76E-06	1.85E-15	7.52E-06	0.0003085	1.47E-13	0.00057618	1.33E-06	2.82E-08	4.28E-09	0.033607	1.60E-18	3.74E-06	0.000123123	6.19E-10
DQ564813	0	0	0	0	0	0	0	0	0	0	0	0	0	0	0
A530088E08Rik	2.86E-68	0	0.0283592	4.87E-32	3.69E-70	0.0297014	1.12E-252	0	1.19E-176	1.68E-38	0.0519111	0.0330847	4.38E-234	0.0275856	0
DQ720192	0	0	0	0	0	0	0	0	0	0	0	0	0	0	0
DQ715448	0	0	0	0	0	0	0	0	0	0	0	0	0	0	0
Dhx38	9.79626	9.24999	10.2983	9.31298	9.00149	9.61288	10.6836	8.59063	8.64378	9.57452	9.85726	8.50084	9.5266	8.39493	9.58541
DQ686205	0	0	0	0	0	0	0	0	0	0	0	0	0	0	0
Dlk1	4.14476	2.89671	3.11766	3.39472	4.48604	5.09173	4.62886	3.23588	3.65603	3.41247	3.30691	2.90975	5.37958	4.76701	3.08552
Gngt2	3.01221	5.21859	1.27332	4.97526	4.57774	3.73235	3.26486	4.14211	2.2453	3.23752	6.87836	6.16726	7.48941	4.09202	3.97085
Gngt1	0	0.0120563	0	0	0.00351078	0.0041714	0	0	0	0	0	0	0	0.00510793	0
Dlk2	7.84936	8.84262	7.94242	9.24007	8.97383	6.88492	4.74155	8.37745	8.43573	8.14366	6.90545	9.04271	8.47525	10.1682	10.09
Gosr2	28.2913	27.1347	26.4392	28.7847	27.7041	27.4134	28.9536	27.8073	27.4739	28.3905	28.2348	28.6968	30.3632	28.7859	28.8227
Dhx32	10.1268	9.51954	9.01858	9.27704	10.4491	9.51996	8.89359	8.971	9.55201	9.73543	8.50425	9.05118	9.56469	10.0444	8.74699
Dhx33	10.8953	12.6628	14.3531	11.5892	13.1984	11.6797	11.03	13.2567	12.987	12.8902	14.428	11.7615	10.6459	13.3682	13.2204
Dhx34	2.95098	4.31943	3.01715	4.22392	3.03436	4.55744	5.06032	3.22777	2.05758	3.74897	3.40508	3.13938	3.12853	2.94112	3.53719
Dhx35	3.21305	3.86919	3.43776	3.73245	3.6164	3.84611	3.05375	3.44517	3.24762	3.27318	3.33512	3.41927	3.63008	3.37961	3.78914
Dhx36	16.9472	16.3404	16.7538	15.995	15.8467	15.9667	14.4069	14.7494	16.794	18.3698	15.0989	14.5223	16.9388	16.481	16.5078
Dhx37	3.73654	4.3667	4.55324	4.12337	3.74845	4.09334	4.10406	4.24714	4.47045	4.1544	3.72724	3.96738	4.01884	4.30007	4.55524
Cops8	45.1963	39.5421	39.994	41.2794	42.7264	41.3779	47.9104	43.1437	40.5265	41.6296	40.1201	43.1527	41.6444	45.1752	41.7841
Cops2	28.4038	28.1902	28.5939	29.5133	29.0049	27.8707	28.2046	28.1641	28.8132	29.6103	27.7354	28.2209	28.8938	31.4554	28.3877
Cops3	33.591	32.2627	32.7516	34.2834	33.6094	32.3637	32.5451	33.4776	33.7471	34.3177	31.5182	37.5727	35.6267	36.6318	34.4268
Cops6	77.8545	72.6088	68.2377	74.6787	68.3444	70.8477	81.7487	67.4418	72.642	71.2528	68.9035	79.4428	82.0885	81.4754	69.6441
Cops4	36.3697	32.0262	33.6733	35.5764	32.2298	33.7582	30.951	32.4921	33.356	30.9717	32.8784	35.2508	36.2804	37.4326	33.4451
Cops5	29.847	28.6268	27.2465	32.1008	29.5787	27.8795	29.2382	28.307	29.2161	31.0926	27.4163	31.3625	32.7046	33.815	29.5315
AK050041	0.0395231	0.0808578	0.174956	0.113073	0.0857733	0.0815305	0.131578	0.0982789	0.180154	0.0680063	0.0698209	0.0377361	0.187685	0.187191	0.103348
4933402J10Rik	0	0	0	0	0	0	0	0	0	0	0	0	0	0	0
DQ691537	0	0	0	0	0	0	0	0	0	0	0	0	0	0	0
Dhcr24	30.8443	28.6345	22.2503	26.491	28.7656	28.1971	33.1808	26.8635	27.0387	24.1331	25.0408	27.6194	29.9164	27.2007	29.4036
1700024G13Rik	0.569344	1.35892	0.504061	0.407214	0.82373	1.37022	0	0.943827	0.346023	0.979654	0.335265	1.2684	0.540733	0.89885	0.496255
C330013J21Rik	0.109015	0.259627	0.195318	0.195991	0.0918032	0.209429	0.222889	0.297899	0.118341	0.165299	0.322648	0.0604293	0.168309	0.130182	0.272044
DQ697272	0	0	0	0	0	0	0	0	0	0	0	0	0	0	0
Lppos	4.38559	4.00594	4.42532	5.04233	3.6633	3.76673	4.29571	5.77748	3.87814	3.60509	4.97682	5.35519	5.27453	4.45424	4.66167
Mir16-1	0	0	0	0	0	0	0	0	0	0	0	0	0	0	0
Mir16-2	0	0	0	0	0	0	0	0	0	0	0	0	0	0	0
Brca1	0.241102	0.138351	0.192631	0.121972	0.172286	0.188025	0.114213	0.163512	0.0911344	0.207429	0.155826	0.125567	0.173135	0.102177	0.12814
Brca2	0.498594	0.368552	0.651337	0.360773	0.40585	0.382236	0.331284	0.332328	0.391021	0.510635	0.484946	0.389871	0.449734	0.279531	0.406759
2310043O21Rik	0	0	0	0	0	0	0	0	0	0	0.078024	0	0.0838942	0	0
Acap1	0.0396079	0.0405156	0.0510281	0.0128958	0.0429781	0.0929845	0.0439535	0.0984901	0.0361076	0.0155108	0.906106	0.037817	1.36142	0.0375185	0.0157156
Acap2	12.6079	15.5545	17.5104	15.1616	15.3955	15.88	12.8694	16.1611	16.1454	16.1261	16.9351	13.2395	13.6372	15.0293	16.6145
Acap3	32.1361	28.6011	27.178	27.3864	28.4194	27.8632	31.8931	27.6481	29.327	30.5773	29.2213	28.6805	28.5691	35.5441	29.4638
Ep400	9.63429	10.5488	11.0379	8.5989	9.71024	12.1746	9.91145	10.4496	10.5957	10.6456	10.6078	10.5765	9.45158	8.5093	10.5146
DQ558374	0	0	0	0	0	0	0	0	0	0	0	0	0	0	0
H2-DMb2	0.189872	0.452571	0.247151	1.02558	0.668512	0.750169	0.632113	0.649112	0.732407	0.272239	2.75327	0.725138	5.67129	0.569978	0.634403
H2-DMb1	0.852697	1.845	0.819022	1.88487	1.12566	1.89214	1.36263	1.45037	2.10125	0.80638	5.51696	1.89008	7.96401	1.42239	0.883826
DQ687551	0	0	0	0	0	0	0	0	0	0	0	0	0	0	0
AB348335	0	0	0	0	0	0	0	0	0	0	0	0	0	0	0
Rps6kb1	6.81434	7.73216	8.22688	7.19214	7.87658	7.57895	6.0727	7.5942	7.92722	8.49589	8.09071	6.85562	6.34141	8.02656	8.21778
Rps6kb2	2.57592	5.44558	5.75208	6.8987	6.86362	5.31376	1.87393	6.12065	5.37501	5.26953	4.12081	2.89669	5.05605	6.39832	5.46342
Samd7	0.0128677	0.0131626	0.0113923	0.00920343	0.0139628	0.0265474	0.0285624	0	0.0117307	0.0332168	0.011366	0	0	0	0
DQ561942	0	0	0	0	0	0	0	0	0	0	0	0	0	0	0
Eras	0	0	1.92E-12	0.0301787	0	0	0	1.87E-14	0.038468	2.93E-14	1.59E-11	0	0	0.0726907	1.84E-15
Tnrc6c	10.1391	11.4821	12.7556	9.03291	11.167	11.896	8.78779	11.6605	11.4922	11.4463	11.3607	9.26055	9.78604	8.98603	11.3187
Cald1	13.4083	13.7493	15.2595	16.6471	15.362	19.8205	11.1533	17.7203	16.633	17.7016	17.7756	18.4284	16.5742	11.6771	11.3908
Snord96a	0.497748	0.493293	0.265708	0.359799	0.542548	0.371437	0.235802	0.382425	0.339138	0.538434	0.545553	0.112447	0.550817	0.586452	0.493834
Grifin	0	0.112474	0	0	0.119312	0.11341	0.122018	0	0.200476	0	0.194243	0.41993	0.104429	0.104154	0
Trmt2b	3.90958	4.21312	4.16059	5.17547	3.96291	4.73107	3.81777	4.15609	3.85894	4.17908	4.2695	4.50041	4.86951	3.39464	3.83266
BC094257	1.06E-07	0.122617	0.0996642	0.127761	0.256135	0.250178	0.260792	0.565231	0.106457	4.39E-06	0.0139751	2.13E-05	0.114573	0.130535	0.17922
Dkk3	313.658	417.558	394.413	360.695	388.704	382.501	382.641	418.456	343.703	399.39	355.546	379.366	337.496	291.931	393.381
0610007P14Rik	27.2606	23.7755	22.7053	26.8294	26.158	21.8819	26.6263	27.9176	24.6121	25.1977	25.5052	28.2866	29.9561	31.9758	23.8265
DQ559390	0	0	0	0	0	0	0	0	0	0	0	0	0	0	0
Cryba2	0.142772	0.292088	0.126401	0.306345	0.0774611	0.147259	0.475309	0.0887547	0	0	0.315273	0.204475	0.203396	0.13524	0.124444
Cryba1	0.16191	0	0.0716716	0.115803	0	0	0	0	0.0562485	0	0	0	0.153773	0	0.0705616
Cryba4	0.866177	0.560523	0.485153	1.00158	0.401642	0.80472	0.937444	0.66267	0.790658	0.209525	1.59109	0.871995	0.947419	0.519333	0.579557
Sema6a	4.20937	3.72858	3.64789	3.05799	3.46706	3.4011	3.40617	2.97846	3.48541	4.13998	2.92573	3.05376	3.44179	2.77614	3.41635
G630093K05Rik	0.0558458	0.0457006	0.0593308	0.0958627	0.0242394	0.057601	0.0247892	0.0555469	0.122187	0.0960923	0.0887907	0.0426566	0.127295	0.0740598	0.0389413
Tnfsf13	1.87669	1.57985	0.853282	2.329	1.59882	2.14098	0.691957	1.66042	1.52836	1.42082	2.4081	1.9071	1.99629	1.70411	0.819278
Tnfsf12	5.21633	5.28792	4.80519	6.49845	5.60661	6.14787	6.63988	5.42099	5.76959	5.76395	6.04876	6.45641	7.25521	5.1285	4.77713
Tnfsf11	0.0181368	0.166972	0	0.19458	0.118082	0.205775	0.0201267	0.0450993	0.0330683	0	0.128161	0.0519502	0.172254	0.0515401	0
Tnfsf10	0.547153	0.325936	0.393055	0.570188	0.741373	0.96604	0.699205	0.477216	0.639902	0.52206	1.03247	0.571339	2.02368	0.405611	0.395131
Tnfsf15	0.00109163	0.00669989	0.00579876	0.0146394	0.00710719	0	0.0072684	0.0081434	0.00597102	0.00563501	0.00578537	0.0187609	0.0870889	0.00689363	0.00190299
Tnfsf14	0	0	0	0.0791176	0	0	0	0	0.0201687	0	0.0586248	0.0211233	0.0420236	0	0
Snord38a	0	0	0	0	0	0	0	0	0	0	0	0	0	0	0
Tnfsf18	0	0.0202581	0	0	0.0214896	0.0204266	0.021977	0	0	0	0.0349858	0	0	0	0
Psg18	0	0	0	0	0	0	0	0	0	0	0	0	0	0	0
Psg19	0	0	0	0	0	0	0	0.0269435	0	0	0	0	0	0	0
Setd1a	7.45556	8.28761	7.84082	7.72574	8.16751	8.26359	6.62318	7.68445	7.91951	7.89957	7.15597	7.08243	6.66803	8.02483	8.31155
Setd1b	7.26716	7.06138	7.73043	5.72689	6.28848	7.2946	6.97429	6.91934	7.34338	6.34929	6.5152	6.0703	5.85143	5.69807	7.63188
Trbv12-1	0	0	0	0	0	0	0	0.247353	0	0	0.175728	0	0	0	0
Trbv12-2	0	0	0	0.164237	0	0	0.237268	0	0	0	0.188856	0	0.203065	0	0
Arhgef10l	7.50982	8.35085	6.37709	7.29694	6.44779	7.55415	5.93714	6.36325	7.08351	7.47563	7.53614	8.34242	9.45335	7.30426	7.78041
DQ559021	0	0	0	0	0	0	0	0	0	0	0	0	0	0	0
Olfr1061	0	0	0	0	0	0	0	0	0	0	0	0	0	0	0
Olfr1062	0	0	0	0	0	0	0	0	0	0	0	0	0	0	0
Olfr1065	0	0	0	0	0	0	0	0	0	0	0	0	0	0	0
Olfr1066	0	0	0	0	0	0	0	0	0	0	0	0	0	0	0
Gje1	0.00361701	0.0106886	0.00949593	0.0144957	0.00196242	0.00942848	0.00603794	0	0.0101235	0.00489005	0.0283989	0.00690694	0.00478853	0.00706007	0.00168143
Mir6940	0	0	0	0	0	0	0	0	0	0	0	0	0	0	0
Recql4	0.213787	0.437377	0.369041	0.512244	0.307176	0.297685	0.154208	0.518297	0.4775	0.257483	0.403649	0.387831	0.322276	0.498218	0.391322
Gcnt7	0	0.0207815	0.0359742	0.0145306	0.0220448	0.0565381	0.0225449	0.0252589	0.0185207	0.0524383	0.0645718	0.0193973	0	0.0192442	0.0354171
Nkap	3.27693	3.56559	3.64055	4.06426	3.47701	3.52036	3.45514	3.28421	3.96385	3.85793	3.35953	3.1721	3.43986	3.80914	3.5446
Mir5118	0	0	0	0	0	0	0	0	0	0	0	0	0	0	0
Mir5119	0	0	0	0	0	0	0	0	0	0	0	0	624.838	0	0
Mir5116	0.0046206	0.0281152	0.0860018	0.0445406	0.0177728	0.118477	0.000485299	0	0.000155736	0.00209783	0.0013136	0.000176331	8.44244	0.000210087	0.000496312
Gcnt1	0.689229	1.37487	0.800705	0.967662	1.17373	1.12338	0.89705	0.973171	1.03943	0.91236	1.63827	0.690116	1.60775	1.05461	1.09138
Mir5114	0.00497129	0.002581	0.00398009	0.00329322	0.00181532	0.00333289	0.0132046	0.00275518	0.00203485	0.00344904	0.00568091	0.00111505	0.00411938	0.00233346	0.00166586
Mir5112	0	0	0	0	0	0	482.967	0	0	0	0	0	0	0	0
Mir5113	4.85E-102	106.993	8.34E-17	2.52E-54	2.58E-36	7.17E-160	1.67E-126	1.39E-179	3.93E-30	9.98E-60	173.807	5.33E-47	2.57E-164	336.997	21.2427
Mir5110	0	0	0	0	0	0	0	0	0	0	0	0	0	0	0
DQ561237	0	0	0	0	0	0	0	0	0	0	0	0	0	0	0
DQ685645	0	0	0	0	0	0	0	0	0	0	0	0	0	0	0
Crtam	0.0325398	0.0652101	0.0288086	0.162767	0.0706187	0.0335624	0	0.0404569	0.0296644	0.0562986	0.143797	0	0.0618083	0.0308232	0
Mir6946	0	0	0	0	0	0	0	0	0	0	0	0	0	0	0
Prame	0	0	0	0	0	0	0	0	0	0	0	0	0	0	0
Mir6947	0	0	0	0	0	0	0	0	0	0	0	0	0	0	0
Csf1	6.24863	9.36577	5.98571	9.38597	9.42878	9.92438	8.57588	8.50157	9.19843	6.23164	10.5271	7.41701	10.1269	8.88689	7.34916
Csf2	0	0	0.0786775	0	0	0	0	0.0552447	0	0	0.0392479	0	0	0	0
Csf3	0.0635645	0	0	0.0227317	0	0.0327811	0	0	0	0.0273434	0.0842191	0	0	0	0
DQ722683	0	0	0	0	0	0	0	0	0	0	0	0	0	0	0
Dclre1b	1.61545	1.92249	1.59639	1.95472	1.84679	1.45881	1.58238	1.46746	1.74814	1.92475	1.65895	1.65529	1.65666	1.53424	1.41301
Dclre1c	1.55433	1.62207	2.07665	1.80891	2.23053	1.79665	1.01545	1.89993	1.71534	2.16599	1.9429	1.2676	1.94622	1.51158	2.03372
Dclre1a	1.08509	1.48968	1.36516	1.45007	1.24973	1.61988	0.728824	1.10058	1.09334	1.30205	1.1266	1.2087	1.56392	1.14506	1.41039
Sycn	0	0	0	0	0	0	0	0	0	0	0	0	0	0	0
Zfp583	1.85674	1.89929	1.97818	1.71065	1.84401	1.80149	1.53661	1.68247	1.99391	1.82756	1.44546	1.12677	1.80827	1.84822	1.82411
Zfp580	12.2667	10.6591	9.04335	9.271	9.49253	10.1967	12.4727	9.4861	9.31141	10.9403	7.79003	7.79381	10.363	12.0071	9.38417
AK081315	0.0493776	0.0757639	0.0874317	0.247216	0.267899	0.178253	0.0547952	0.184175	0.202565	0.0849627	0.348919	0.117863	0.281378	0.233864	0.172155
Adap1	67.7798	62.4401	59.1393	64.6814	59.3222	57.4986	63.8492	60.6559	57.4974	59.0127	57.4388	64.869	63.9686	66.0652	62.5354
Adap2	1.23307	2.15354	1.65825	2.48865	2.02333	2.44091	1.30049	1.98211	2.13667	1.40911	2.97791	1.36622	2.10669	1.48784	1.6724
AK084795	0.643547	0.517154	0.539667	0.783351	0.587346	0.623178	0.565478	0.54458	0.767565	0.801682	0.662685	0.738867	0.903579	0.759104	0.604537
AK084798	0.706547	1.0656	0.896033	0.944435	1.31973	1.22687	1.0464	1.00534	1.14684	0.731084	1.3669	1.24892	0.915907	1.022	1.2247
DQ699365	0	0	0	0	0	0	0	0	0	0	0	0	0	0	0
DQ699366	0	0	0	0	0	0	0	0	0	0	0	0	0	0	0
AK164737	2.76785011454e-317	3.95E-54	7.32E-86	0.0301381	2.01E-29	3.32142991995e-317	0	6.45E-37	1.18E-186	0.0177541	6.15E-28	0.0197032	1.11E-65	9.60E-163	0
Pram1	0.279426	0.417578	0.470318	0.341857	0.406106	0.485537	0.170614	0.479813	0.350259	0.347323	0.630723	0.216346	0.383722	0.424295	0.497311
AK053689	2.36985	2.63753	3.02287	2.70878	2.79787	2.41418	3.57667	2.84222	3.10615	2.9915	2.41842	2.61836	1.74919	2.18073	3.21747
DQ718948	0	0	0	0	0	0	0	0	0	0	0	0	0	0	0
DQ685795	0	0	0	0	0	0	0	0	0	0	0	0	0	0	0
Edc3	8.12389	8.03436	7.41037	7.91674	7.63435	7.22624	8.01145	7.5748	7.2252	7.35989	6.67744	7.7547	8.0941	7.62934	7.91199
Aak1	58.505	60.289	63.2776	48.5673	52.4198	55.1077	57.0143	56.2781	54.4452	59.5004	47.157	45.6433	43.2011	29.5743	58.2069
AK016672	0	0.00350966	1.35E-17	0.00631025	0	0	0	0.00432182	1.33E-07	3.90E-07	0.0133491	0.00347529	0.00424603	1.02E-24	0.00383168
Avpi1	13.026	11.177	11.0255	14.0603	11.0798	12.6972	12.496	11.5088	12.0925	11.4941	12.8123	13.1204	15.1357	15.3219	11.3954
Atcayos	0.761104	0.756924	0.594064	0.950102	0.573002	0.919507	0.2751	1.44603	0.308993	0.1788	0.25388	0.48444	0.198041	0.936873	1.24159
Nek10	0.445218	0.27565	0.508269	0.393853	0.3814	0.483596	0.351046	0.320472	0.587655	0.46385	0.300117	0.246103	0.422844	0.166752	0.34744
Asap1	14.1959	17.8491	17.0686	17.0241	13.985	16.0018	14.0956	16.8618	16.2109	15.8996	13.5345	16.2704	14.2488	11.9294	20.507
Asap2	6.99546	8.28853	8.97379	8.71895	8.35742	9.04749	7.85156	8.75044	9.7924	9.39395	8.21897	8.03282	7.80544	8.22821	9.42107
Asap3	0.650873	0.779107	0.682569	1.05147	1.0253	0.911347	0.464735	0.82626	0.740852	0.562291	1.01901	0.877131	0.930243	0.5933	0.441793
Usf2	58.8652	60.3225	54.7502	61.6466	63.3353	55.3861	63.2966	59.9822	56.355	59.4205	56.1038	62.3044	63.3895	61.5017	59.5615
Mir770	3.62E-62	1.09E-52	1.34E-30	2.01E-32	7.24E-59	69.5936	1.13E-15	9.47102	2.52E-49	2.05E-12	1.14E-16	2.17E-64	7.53E-36	2.98E-59	4.19E-29
Hyls1	3.94211	3.9539	3.62608	4.39407	5.1109	4.30363	4.03375	4.1056	4.5739	3.67784	4.34124	4.7415	4.23025	5.28602	4.26159
AK052881	0.0789855	0	0	0	0.0486177	0	0	0	2.55E-89	0.0602398	0.142498	0.0681547	0.0699941	0.0686868	0
AK052880	0	0.0450987	0.0585495	0	0	0	0	0.0274077	0	0.0568961	0	0	0	0.0208813	0.0192142
DQ706376	0	0	0	0	0	0	0	0	0	0	0	0	0	0	0
D10Jhu81e	49.8664	49.8063	46.6247	53.7832	50.3166	48.68	47.0492	47.2601	48.9079	49.8744	47.9207	57.6559	55.118	58.2846	47.0107
DQ706373	0	0	0	0	0	0	0	0	0	0	0	0	0	0	0
1810020O05Rik	0.1624	0.119997	0.304609	0.250021	0.0948287	0.225345	0.145469	0.363361	0.348941	0.187965	0.211908	0.25032	0.456499	0.528195	0.260229
Mir483	0	0	0	0	0	0	0	0	0	0	0	0	0	0	0
Mir486	0	0	0	0	0	7.31108	7.86601	0	0	0	6.25641	0	0	0	0
Mir484	0	0	0	0	0	0	0	0	0	0	0	0	0	0	0
Mir485	0	8.96E-70	1.86E-17	4.60E-09	0	0	0	0	0	0	0	0	0	0	1.28E-35
Rps15a-ps4	23.9515	22.7209	20.2129	25.6875	22.7563	23.3312	27.7678	21.9883	22.1075	19.3389	24.6518	25.2643	29.086	24.8184	20.5956
Mir488	0	0	0	0	0	0	0	0	0	0	0	0	0	0	0
Mir489	0	0	0	0	0	0	0	0	0	0	0	0	0	0	0
AK210908	15.9343	12.9558	0.001042	13.9136	24.2287	15.1632	0.00170405	0.0116757	0.00358161	0.000586435	70.5231	0.0493179	0.00182128	56.5108	0.00117669
Mir1912	0	0	0	0	0	0	0	0	0	0	0	0	0	0	0
Apol7a	0.0793839	0.288732	0.0546627	0.124426	0	0.0181924	0.0587277	0.095043	0.0857717	0.0579365	0.0311624	0.0673727	0.12566	0.0710184	0.0922584
Apol7c	0.0200194	0.0204783	0.00886198	0.0119321	0	0	0.011108	0.0248904	0	0	0.313874	0	0.0998205	0	0.0174495
Apol7b	0	0.0713989	0	0.0412405	0.0127016	0.0324192	0	0.0301851	0.013833	0	0.0603129	0	0.080703	0.00431199	0.0423227
Apol7e	0	0.0372516	0	0.0542639	0.0127016	0.0324192	0	0.0301851	0.013833	0	0.108563	0	0.201757	0.00431199	0.0423227
Apol7d	0	0.0645756	0.0279451	0.0460572	0.0688117	0.224421	0	0.0773368	0.0575505	0.078724	0	0.0599872	0	0	0.108433
Ism2	0.0317277	0.113592	0.0421345	0.0907707	0.0860695	0.0818121	0.105626	0.059171	0.0723103	0.122834	0.0560496	0.0454397	0.0451999	0.060108	0.0138273
Ism1	1.47332	1.56645	1.46772	1.18498	1.4197	1.29296	1.52762	1.34874	1.59921	1.43589	1.46481	1.39148	1.36534	1.77764	1.25154
Fibp	19.798	21.805	20.7911	23.266	24.9878	24.0143	19.7276	20.4199	19.3568	21.186	21.4334	22.4301	21.537	27.5822	21.4699
AK037139	0.0716646	0.0366535	0.158618	0.102514	0.0388817	0.0369584	0.0795273	0.178202	0.0979981	0.0308278	0.0633008	0.0342121	0.102095	0.135768	0.0312323
DQ691885	0	0	0	0	0	0	0	0	0	0	0	0	0	0	0
Kcnmb1	0.286625	0.378315	0.302874	0.33258	0.250821	0.267023	0.352274	0.289689	0.345588	0.32614	0.318509	0.432568	0.326666	0.360839	0.201476
Pcdha3	1.70132	1.56894	1.60006	1.22508	1.18187	1.46205	1.60775	1.37591	1.34853	1.74657	1.48395	1.06952	1.75209	1.78105	1.80823
Kcnmb3	0.0713859	0	0	0	0	0	0	0	0	0	0	0	0	0.0676202	0
Pcdha1	0.769616	1.11303	0.744518	0.653716	0.848193	0.98814	0.778507	0.750221	0.776409	0.742738	0.561887	0.856147	0.812324	0.847647	0.88948
AK146386	0	0	0.0426298	0.0344391	0	0	0	0	0.0438961	0	0.0425313	0	0	0	0.0419695
Kcnmb4	45.7329	42.2324	39.9202	42.4577	44.357	42.3762	49.2849	44.5598	38.325	42.392	43.1284	47.8503	49.6993	49.4566	45.392
Pcdha4	2.60813	3.27332	2.56499	1.69686	2.92083	2.99024	3.16595	2.70376	2.78575	2.42541	2.02041	2.4454	2.7687	3.13644	3.13753
Pcdha5	2.03903	2.01866	2.03331	1.58045	1.76154	1.78127	1.56636	1.96553	1.85986	2.1491	1.42359	2.0025	1.88282	1.83139	2.04595
AK085942	0.11435	0.0575331	0.0253407	0.164819	0.0939646	0.118936	0.126844	0.142463	0.103458	0.173281	0.154787	0.137572	0.10904	0.080806	0.124753
Pcdha8	0.444315	0.631126	0.413368	0.551758	0.699537	0.495193	0.644544	0.46786	0.545246	0.366963	0.493462	0.505157	0.631314	0.507239	0.34503
Dupd1	0	0.0838258	0.0725514	0.117223	0.177844	0.169047	0.136408	0	0.149413	0.176256	0.18096	0.156485	0.116745	0.0388124	0.107142
Fhad1	2.14269	3.7295	4.08694	3.5706	3.02105	4.14608	3.60653	3.83147	2.68812	3.933	4.49498	2.74613	3.05095	3.26032	3.18851
AK010638	8.50E-59	8.17E-74	3.54E-54	1.44E-51	0.0693636	6.15E-47	3.21E-52	2.47E-55	9.66E-62	3.28E-56	5.63E-76	1.89E-61	3.56E-55	1.55E-60	9.36E-57
Cacna2d2	5.06849	4.75436	5.04473	4.8626	4.06006	4.45828	4.05174	4.27085	4.49639	4.57419	3.94936	4.08295	4.20575	3.74982	4.86438
Cacna2d3	24.8861	27.178	28.9782	22.3124	24.6282	23.6385	21.4867	24.9851	26.1693	25.8541	21.6322	24.4913	22.0872	24.4829	26.9613
Cacna2d1	31.3805	30.3867	31.5752	25.1608	29.7803	29.7234	33.3793	29.1254	30.9521	29.7059	28.7302	26.9077	26.4115	27.0869	31.0126
Cacna2d4	0.312621	0.231272	0.346348	0.264009	0.28078	0.18608	0.189683	0.162043	0.150934	0.275973	0.144653	0.183617	0.243477	0.15268	0.162875
Aagab	27.5182	35.4669	35.7841	30.5183	33.7745	29.6135	29.5314	30.3119	36.3343	26.4063	25.1353	33.6966	34.0216	33.6476	32.7674
1700066B19Rik	0	0.0491479	0.0283584	0.0114549	0	0	0.0177728	0	0.0292008	0.0275576	0.0565858	0	0.0304215	0.0151707	0.0139596
FJ541116	0	0	0	0	0	0	0	0	0	0	0	0	0	0	0
AK076896	0	0	0	0	0	0	0	0	0	0	0	0	0	0	0
FJ541114	0	0	0	0	0	0	0	0	0	0	0	0	0	0	0
FJ541115	0	0	0	0	0	0	0	0	0	0	0	0	0	0	0
FJ541112	0	0	0	0	0	0	0	0	0	0	0	0	0	0	0
FJ541113	0	0	0	0	0	0	0	0	0	0	0	0	0	0	0
FJ541110	0	0	0	0	0	0	0	0	0	0	0	0	0	0	0
FJ541111	0	0	0	0	0	0	0	0	0	0	0	0	0	0	0
DQ694209	0	0	0	0	0	0	0	0	0	0	0	0	0	0	0
FJ541118	0	0	0	0	0	0	0	0	0	0	0	0	0	0	0
FJ541119	0	0	0	0	0	0	0	0	0	0	0	0	0	0	0
Ndufv3	118.227	117.917	117.419	119.62	116.258	116.023	124.463	116.129	96.7439	119.943	108.929	121.716	124.649	123.252	111.155
Ndufv2	66.7233	64.9355	61.5718	71.645	64.6529	63.9677	68.4142	60.6414	63.0314	66.6319	64.5802	74.2198	73.0646	80.643	67.2273
Ndufv1	88.4949	82.3644	79.8344	87.5952	82.1617	81.6155	96.8941	86.0183	79.7185	82.1846	78.7694	92.6349	96.6313	97.222	84.0406
Lyzl4os	0	0	0	0	0	0	0	0	0	0	0	0	0	0	0
BC002163	107.33	100.307	94.9131	104.446	93.779	88.2418	90.1062	92.2894	91.6633	94.6953	97.4419	110.378	108.673	112.925	94.4194
4930559C10Rik	0	0	0	0	0	0	0	0	0	0	0	0	0	0	0
AK216694	14.8379	51.6474	1.31E-48	113.507	88.9797	20.3702	58.3193	2.36E-17	48.3536	57.357	76.8365	96.6242	69.0012	63.148	44.113
Oxct1	89.1985	84.38	87.4476	88.4875	83.5334	81.4663	82.1123	84.913	83.0257	88.6987	78.7693	89.9669	88.2995	81.407	82.4181
Wdhd1	0.790549	1.09867	1.26461	1.27618	1.41735	1.16431	0.89404	1.08353	0.995634	1.24249	0.923586	1.23224	1.1843	0.994446	1.39665
Gpa33	0	0	0	0	0	0.0181874	0.0391358	0.0219236	0	0.0151705	0.0155753	0	0	0	0
Aadat	0.0701188	0.0478172	0.0620788	0.11702	0.0760861	0.0723225	0.0518747	0.0290598	0.0852305	0.0402171	0.0619354	0.0446323	0.0665952	0.15498	0.0407449
BC089597	0	0.0355135	0.0614739	0	0	0	0	0	0	0.029869	0	0	0.0329732	0.00657728	0
DQ568672	0	0	0	0	0	0	0	0	0	0	0	0	0	0	0
3110039I08Rik	5.66029	5.41383	5.57783	6.8482	5.2978	5.80141	4.24344	5.75023	5.10015	5.6499	5.87404	4.42637	5.43602	6.17072	5.83002
Aadac	0	0	0	0	0	0	0	0	0	0	0	0	0	0	0
Gm23284	1.48588	1.82393	3.55187	1.97368	3.22467	0	1.97869	0	3.04782	0	4.07803	1.4187	3.17523	1.05563	0
AK019375	0.117682	0	0.208377	0.589191	0.383092	0.121381	0.261188	0.146315	0.214567	0.607477	0.103948	0.224722	0.111768	0.334423	0
Cdc27	11.0754	10.3034	11.1638	10.1902	10.3282	10.1582	10.047	10.686	10.484	11.4662	10.1488	9.59557	10.1977	9.32198	10.7445
Cdc26	14.4764	14.5218	14.2332	17.2866	14.4632	14.1698	12.7797	15.8008	12.9397	13.581	16.0147	15.5679	14.9944	16.7413	14.0126
Cdc23	13.2057	11.8402	13.466	14.1086	12.9001	13.0795	12.5562	12.4363	14.1978	14.7544	12.5305	11.5242	13.8025	13.5616	14.2706
Cdc20	0.233967	0.239299	0.291653	0.267772	0.230263	0.404828	0.181856	0.347834	0.1923	0.281505	0.43382	0.245496	0.442844	0.22283	0.185389
Olfr772	0	0	0	0	0	0	0	0	0	0	0	0	0	0	0
Olfr773	0	0	0	0	0	0	0	0	0	0	0	0	0	0	0
Olfr770	0	0	0	0	0	0	0	0	0	0	0	0	0	0	0
Olfr771	0	0	0	0	0	0	0	0	0	0	0	0	0	0	0
Olfr776	0	0	0	0	0	0	0	0	0	0	0	0	0	0	0
Olfr777	0	0	0	0	0	0	0	0	0	0	0	0	0	0	0
Olfr774	0	0	0	0	0	0	0	0	0	0	0	0	0	0	0
Olfr775	0	0	0	0	0	0	0	0	0	0	0	0	0	0	0
Nol11	6.50249	6.81768	6.78153	6.82886	6.96159	6.72382	7.25996	7.56286	5.96606	7.01432	5.84003	6.42274	6.57612	7.40948	6.44466
Nol10	5.91003	5.80529	5.98611	6.21826	5.79636	5.31846	4.78803	6.0513	6.36502	6.84677	6.4199	6.00016	5.60172	6.66825	6.83163
Nol12	8.48314	7.72275	7.1094	7.78309	8.2667	7.07201	6.37493	7.93597	7.22674	7.67036	7.03842	8.36498	8.1644	8.62076	7.93253
Morn5	0.9853	0.542705	0.872323	1.02997	0.822425	0.938092	0.588756	1.31927	0.898236	1.36934	0.803361	1.30258	0.575869	0.86153	0.5285
Morn4	34.1393	27.9232	28.4384	28.9261	28.7007	28.8732	32.4898	30.8941	27.9541	29.8674	27.6508	31.2686	33.7524	31.1386	29.5615
Morn1	0.916987	1.27161	1.74412	1.33686	1.42673	1.59127	0.781043	1.15289	1.36311	1.93421	1.74436	1.42637	1.57375	1.22865	1.03722
Morn3	0.101897	0.560284	0.419463	0.422823	0.44255	0.28108	0.227226	0.58341	0.232233	0.716477	0.599917	0.326854	0.451334	0.444487	0.28182
Morn2	11.28	11.0963	10.4271	13.5748	11.6917	9.81459	9.38553	9.14331	9.95096	11.0908	10.8468	12.341	11.4383	11.2262	9.86868
AK143266	0.0293492	0.0300678	0.0796717	0.0518464	0.00640669	0.0723446	0.0152773	0.0278195	0.125724	0.0329619	0.0916996	0.0214398	0.0381343	0.0564669	0.023236
Zbtb22	11.9722	12.6728	11.0656	9.99977	11.4562	12.5746	13.003	12.2324	11.8651	11.2143	11.7865	12.0932	12.1732	11.8729	10.7947
Zbtb20	3.64663	4.79493	7.84183	2.93868	5.43543	6.12863	5.94488	5.60214	5.36811	5.42027	6.31837	5.10881	3.19059	2.66888	4.64253
Zbtb21	5.10015	4.54276	5.46191	5.42976	5.35852	5.05035	4.91273	5.84252	5.16683	5.13332	4.75395	4.97826	4.64536	5.25438	5.03603
Zbtb26	2.10153	1.91259	1.85067	2.16362	1.78833	1.66844	1.5855	1.54991	1.79406	2.88973	2.08565	1.59135	1.86972	1.6554	2.03022
Hils1	0	0	0	0	0	0	0	0	0	0	0	0	0	0	0
Zbtb25	4.47744	4.32436	4.16481	3.96403	4.75065	4.66735	3.24667	3.44741	4.12027	4.29436	3.89914	3.87272	4.30975	3.79997	4.39978
Psd3	89.8026	87.3598	97.3604	88.6569	83.2433	83.3988	101.51	86.1425	81.5025	90.5161	84.3997	84.5538	77.5031	68.2105	90.8252
Mgat4d	0.0194384	0	0	0	0.0210927	0	0	0	0	0	0	0	0	0	0
Otud5	22.8042	21.7181	22.7721	21.0198	22.7104	21.0867	21.1358	21.7239	20.5827	22.2129	21.6202	20.2312	22.1702	21.9682	21.1168
Otud4	6.82627	7.74583	7.97663	6.96586	6.7588	7.73212	6.61932	7.69631	8.03923	8.20901	7.82806	5.91278	6.92787	7.4312	8.21582
Otud3	2.81419	3.59836	3.42582	3.00123	2.91736	2.87672	2.11915	2.53046	3.61921	3.56687	2.64111	3.67056	3.22164	2.52293	3.63558
Otud1	6.86018	5.04021	4.72701	5.08793	4.88244	4.91873	6.01292	5.27912	5.41628	4.92065	4.99598	5.41547	5.29662	5.14761	5.45475
G6b	0	0	0	0.0257267	0	0	0	0.022359	0	0.0154718	0.0158847	0.0515163	0.0170798	0.0511097	0
DQ540135	0	0	0	0	0	0	0	0	0	0	0	0	0	0	0
DQ540131	0	0	0	0	0	0	0	0	0	0	0	0	0	0	0
Mgat4a	5.88712	6.02543	6.48746	5.96248	5.7943	6.49349	6.38753	6.47079	6.51036	6.24749	6.46046	6.17474	5.77163	6.06102	6.40709
Gphn	22.1507	20.5127	20.7275	20.1509	20.6071	20.1885	18.602	19.9108	20.7321	21.9275	19.7397	19.5663	20.5886	19.4344	21.0975
Fam76b	3.19271	4.89721	3.84005	4.2347	3.58414	4.45533	2.85955	3.56937	3.96765	3.72936	3.93972	2.43184	3.34632	3.55426	3.90538
Fam76a	16.1498	16.315	14.7953	16.8963	16.9875	16.6745	16.6938	15.9927	16.4536	16.4639	16.3791	17.6871	17.6368	18.6666	16.0111
Insl6	0.242336	0.330519	0.143032	0.519979	0.350612	0.416586	0.268924	0.703028	0.515485	0.41698	0.713511	0.539883	0.767192	0.153035	0
Mgat4b	23.012	22.7943	22.5427	21.8348	23.2638	21.6179	23.7732	25.2766	24.5858	24.4556	22.5199	24.4532	24.8903	26.9889	22.0493
DQ713725	0	0	0	0	0	0	0	0	0	0	0	0	0	0	0
DQ702868	0	0	0	0	0	0	0	0	0	0	0	0	0	0	0
Insl3	0.657982	0.000749856	9.66E-99	1.75E-13	0.31516	1.20E-08	3.97E-56	0.146683	0.000200315	0.137669	0.230355	3.04E-37	1.58E-08	0.396654	0.123958
AB335823	0	0	0	0	0	0	0	0	0	0	0	0	0	0	6230.93
Scarletltr	0	0	0	0	0	0.663971	0	0	0	0	0	0	0	0	0
Vps35	56.9372	54.1755	53.1254	58.6992	53.5325	53.3704	53.3267	54.7881	55.3718	56.0716	48.6242	52.6784	53.8872	57.4759	53.7753
Vps36	10.6079	8.60373	10.4859	11	9.5363	10.1622	6.74302	9.90641	10.7346	11.2085	9.0363	9.34164	10.9274	8.1628	9.45552
Vps39	18.0134	18.4899	18.2328	17.8661	17.9561	17.546	16.4181	18.0297	17.9009	18.8365	16.8928	17.9743	18.0532	16.9725	18.2855
DQ713721	0	0	0	0	0	0	0	0	0	0	0	0	0	0	0
AK034775	0.0365592	0.0149707	0.0325889	0.068264	0.0373317	0.0230242	0.00718941	0.0432812	0.0711909	0.0213712	0.0477534	0.0321934	0.0393076	0.0316246	0.010639
DQ713539	0	0	0	0	0	0	0	0	0	0	0	0	0	0	0
DQ713531	0	0	0	0	0	0	0	0	0	0	0	0	0	0	0
3930402G23Rik	0.0975585	0.0523337	0.061694	0.069777	0.0756145	0.14375	0.0154645	0.17328	0.101644	0.143886	0.0677861	0.0266126	0.060738	0.0924121	0.0485906
Lhpp	9.76684	8.99699	9.57673	9.915	10.2562	8.8552	9.14856	8.58511	7.99429	9.21594	9.29951	9.50071	10.1987	9.5252	8.23842
Adamts17	0.835879	0.817831	0.862897	0.844301	1.09796	0.789397	0.842707	1.00717	0.974301	1.06159	0.809955	0.756189	0.819263	0.676894	0.766164
Pde4dip	33.0448	32.4321	38.4101	30.8243	33.1008	35.4418	30.3193	35.7331	37.6798	35.8225	32.2796	31.4068	31.1264	27.5071	37.7734
AK029587	0	0	0	0	0	0	0	0	0	0	0	0	0	0	0
AK145144	0.0987544	0.101018	0.174862	0.141265	0.160738	0.152787	0.219179	0.184173	0.0450141	0.169924	0.174458	0.235723	0.187584	0.0467725	0.258231
1700016C15Rik	0	0	0	0.0483408	0	0.0697116	0.0750029	0	0	0.0581479	0.0596995	0	0	0	0
2210409D07Rik	0	0	0	0.207441	0.157358	0.149574	0.160927	0	0.132202	0	0	0.13846	0	0	0
A930001C03Rik	1.38E-10	9.00E-07	0.232083	0.157332	1.71E-06	8.65E-07	1.10E-20	1.31E-06	0.187205	0.0861472	1.43E-06	6.56E-07	0.121186	0.105662	2.54E-10
Eef2	558.516	510.899	499.48	535.866	520.21	495.231	603.297	473.159	508.099	495.973	456.477	501.421	566.971	380.99	479.182
AK135406	0.181149	0.279105	0.174943	0.273839	0.153615	0.199055	0.178219	0.256733	0.259114	0.214691	0.208307	0.185441	0.105734	0.144396	0.139746
1500009C09Rik	48.6133	44.8916	45.023	45.363	45.4561	44.6169	45.82	42.7744	41.7269	41.8002	40.6467	48.7895	49.5442	48.3785	41.1579
AK013453	1.7691	1.68039	1.45438	0.81342	1.43974	1.17302	1.54252	1.02122	0.806389	1.19587	0.948742	0.844556	1.32016	0.77804	1.37678
Ggact	29.7146	27.542	21.9727	33.344	27.8283	25.4069	29.7092	30.3314	29.2949	24.5008	25.315	26.5025	34.6434	30.5648	23.6042
Gm5095	0	0	0	0	0	0	0	0	0	0	0	0	0	0	0
M18858	0	0	0	0	0	0	0	0	0	0	0.0133293	0	0	0	0.0131532
AK047352	0	0.109853	0.190156	0.038405	0.116531	0.332301	0.0595872	0.0667605	0.146853	0.0461965	0.0948583	0.051268	0	0.0508633	0.0468027
AK187783	0	0	0	0	0	0	0	0	0	0	0	0	0	0	0
Endod1	26.606	35.819	28.3632	36.6359	32.6734	32.8411	29.6527	31.9516	34.0951	28.8835	34.0498	34.7891	30.4824	31.658	30.6112
DQ686040	0	0	0	0	0	0	0	0	0	0	0	0	0	0	0
DQ686042	0	0	0	0	0	0	0	0	0	0	0	0	0	0	0
Gtf2e2	8.28532	7.89103	8.87243	9.27786	6.94292	7.76239	7.5544	8.05055	8.39436	9.73259	8.23309	9.83415	8.94156	9.40174	9.70841
BC064032	8.36348	8.8866	9.036	8.45858	8.81156	8.87698	8.56198	9.08915	9.08289	9.98297	8.24599	10.1122	8.67405	9.8693	9.76096
DQ558065	0	0	0	0	0	0	0	0	0	0	0	0	0	0	0
DQ701881	0	0	0	0	0	0	0	0	0	0	0	0	0	0	0
DQ701885	0	0	0	0	0	0	0	0	0	0	0	0	0	0	0
1700069L16Rik	0	0	0.0652229	0	0	0	0	0	0	0	0	0	0	0	0
Slc31a1	4.65565	7.51905	8.69659	6.61939	5.50773	6.45745	4.37642	6.20487	7.55777	11.3369	8.38617	7.22661	7.03007	6.11138	3.93072
Slc31a2	2.77377	4.47747	4.11633	5.29634	4.30784	4.47996	2.93685	4.38869	5.38263	4.2397	5.57475	4.66345	5.4492	4.02895	4.73006
Camk2n2	61.5749	46.9425	37.6641	48.7817	38.5615	36.4778	42.9247	44.2261	40.652	41.0983	33.2912	45.4797	52.8662	46.9333	46.1946
Camk2n1	229.887	196.536	171.709	204.309	192.76	161.804	192.024	190.798	176.682	176.166	186.316	222.804	206.127	202.97	203.741
Ctbs	3.09788	2.97532	2.53377	3.19411	2.78963	3.03933	2.69469	3.10377	3.33615	2.87347	2.75617	2.43273	3.01473	3.01388	2.29655
Mtm1	1.09726	1.26062	1.25688	1.76589	1.41928	1.33443	1.17963	1.4642	1.36696	1.50106	1.8396	1.38581	1.46733	1.38921	1.25308
AK079802	0	0	0	0	0	0	0	0	0	0	0	0	0	0	0
DQ709965	0	0	0	0	0	0	0	0	0	0	0	0	0	0	0
Ap3m2	44.9007	43.1445	41.6051	40.0877	41.1622	42.7206	46.9847	43.3198	42.185	41.9283	38.6852	41.9993	41.7921	44.5833	43.1748
AK133808	1.66967	2.71656	1.92321	2.50213	2.55436	3.49917	1.22203	2.54018	1.24312	1.59656	2.32091	2.34252	2.59192	2.12919	1.82124
Hmgn5	7.89492	7.54485	9.22062	7.03131	8.40251	8.18767	5.88076	8.56532	8.27197	8.92302	8.50197	8.98359	8.00149	8.35948	7.95605
Hmgn3	27.8153	33.0923	28.0005	32.388	34.7622	31.2184	23.5537	31.6144	32.2009	36.8992	33.3988	32.4847	36.8005	40.1523	31.8147
Hmgn2	18.8598	19.123	15.9242	20.2953	19.0092	18.1185	16.4374	20.0387	18.1883	20.7707	18.5969	18.5351	21.3719	23.4168	17.727
Hmgn1	22.6339	23.3733	23.7768	25.8082	21.6473	22.9606	22.2238	24.6693	23.3958	24.2163	25.407	24.3442	25.3163	27.9998	23.1614
AK189432	177.34	106.105	109.608	114.874	105.293	148.402	115.108	99.844	100.662	126.664	121.177	79.8688	127.116	126.781	84.5784
AK133807	0.217608	0.434269	0.344421	0.41335	0.257359	0.457598	0.203967	0.436239	0.241117	0.233248	0.279707	0.394579	0.172951	0.199752	0.333232
DQ558068	0	0	0	0	0	0	0	0	0	0	0	0	0	0	0
Smyd5	14.8373	16.3955	14.0621	15.2737	15.4015	15.7352	12.7864	14.3657	14.3625	13.9281	13.9159	15.7644	15.5895	16.3107	15.4013
AK134468	0	0.0481706	0	3.03E-269	3.76373000079e-315	5.43E-109	1.93E-146	1.35E-94	0.0305686	0.000215484	7.54E-46	6.23E-95	9.86E-145	1.31E-54	2.25E-15
5430425K12Rik	0	0	0	0.0342591	0.0519756	0	0	0	0	0	0.042309	0	0.0909866	0	0
Specc1	18.9936	19.8856	21.5501	20.2845	20.8347	20.7189	20.3441	20.8171	21.1283	22.6471	19.5025	20.1679	21.5036	17.1342	22.0806
Snord98	0	0	0	0	0	0	0	0	0	0	0	0	0	0	0
Snord99	0	0	0	0	0	0	908.6	56.462	0	0	0	0	0	0	0.00245017
1190002N15Rik	7.15872	6.59855	6.87764	6.83624	6.67958	6.68387	6.05632	6.57756	7.2971	7.57172	6.0453	6.31865	6.78964	6.93012	7.01969
Snord90	0	0	0	0	0	0	0	0	0	0	0	0	0	0	0
Limd1	3.85504	8.77669	4.15495	3.27043	3.08044	3.31478	2.94195	4.56422	3.22685	10.1337	4.70875	4.76508	3.72505	2.79953	4.51829
Snord92	0	0	0	0	0	0	0	0	0	0	43.7574	0	0	0	0
Snord93	0	0	0	0	0	0	0	0	0	0	0	0	0	0	0
Cd74	2.27649	6.87659	2.93579	11.6556	7.28492	23.7642	4.21033	7.14206	11.7604	4.78651	197.249	10.8299	233.873	6.97513	3.05541
Cd70	0	0.118118	0.102231	0.0412944	0.125298	0.17865	0	0	0.105268	0.049672	0.152992	0.0551251	0.0548342	0.0546899	0.0503238
DQ710167	0	0	0	0	0	0	0	0	0	0	0	0	0	0	0
Cd72	0.0373936	0.621321	0.0691993	0.620683	0.249546	0.545874	0.305483	0.32981	0.434388	0.14753	1.43119	0.337131	4.90836	0.48817	0.131861
Dcxr	3.45299	4.85195	3.68492	6.00344	4.64156	6.58128	4.80409	3.81938	4.5519	3.57838	5.64065	4.89496	6.1573	4.963	4.67227
Olfr813	0	0	0	0	0	0	0	0	0	0	0	0	0	0	0
Nudt22	4.03105	4.21822	4.30722	4.47384	4.27355	4.73122	2.77654	4.03251	4.56189	4.18559	4.3382	5.08748	4.97262	4.82787	3.91742
Nudt21	16.8948	14.6648	16.2879	16.2665	14.763	15.1638	15.819	16.3095	15.513	17.4003	15.3535	15.9758	17.1644	15.5419	15.9295
BC018473	0.0602052	0.0506359	0.0106576	0.0602862	0	0.0124163	0	0.0299386	0.0658631	0.0414367	0.031906	0.022991	0.011433	0.0114029	0.0314846
Fam162a	48.2016	42.6622	42.6873	49.7571	45.8122	39.7556	40.7815	38.8904	41.4492	48.1606	49.3702	49.4494	48.0521	50.7591	40.5984
Fam162b	0	0	0	0	0	0	0	0	0	0	0.0926946	0	0	0	0
Npm3-ps1	2.33165	2.33691	3.16943	3.06583	2.14674	3.20658	2.90111	2.48901	2.89858	2.20863	3.01649	3.12572	3.08686	3.90419	2.21709
Zfp91Cntf	2.29E-06	2.01E-06	3.91E-06	1.76E-06	3.63E-06	3.18E-06	3.07E-06	3.07E-06	2.01E-06	2.87E-06	1.59E-06	2.11E-06	1.23E-06	7.89E-07	2.20E-06
Vmn1r56	0	0	0	0	0	0	0	0	0	0	0	0	0	0	0
Vmn1r57	0	0	0	0	0	0	0	0	0	0	0	0	0	0	0
Vmn1r54	0	0	0	0	0	0	0	0	0	0	0	0	0	0	0
Vmn1r55	0	0	0	0	0	0	0	0	0	0	0	0	0	0	0
Ankub1	0.615903	0.969259	0.461392	0.982686	1.07959	0.781858	0.55204	0.79521	0.89081	0.855966	1.33913	0.793874	0.539956	0.762925	0.495542
Vmn1r53	0	0	0	0	0	0	0	0	0	0	0	0	0	0	0
Vmn1r50	0	0	0	0	0	0	0	0	0	0	0	0	0	0	0
Vmn1r51	0.0170932	0	0	0	0	0	0	0	0	0	0	0	0	0.0161915	0
Gm7168	0	0	0	0	0	0.0287126	0	0	0	0	0	0	0	0	0
Gsdma	0.0219087	0.00747027	0	0	0.0158488	0	0	0.00605318	0.0266304	0.0125659	0	0	0	0	0.0127308
Gsdmc	0	0	0.00405878	0.00437227	0	0	0	0	0	0	3.41E-05	0.00713838	0	0	3.36E-05
Gsdmd	0.726405	1.31832	0.70535	1.20669	0.88993	1.13594	0.70209	1.04881	1.02537	1.08863	2.46302	1.09627	3.42725	1.06542	0.919093
Vmn1r58	0.00867834	0.00152181	0.00146348	0.00118229	0	0.00170497	0	0	0.00691045	0	0.00602291	0.00723753	0	0.00281847	0.00345795
Vmn1r59	0	0	0	0	0	0	0	0	0	0	0	0	0	0	0
Azi2	15.7389	15.9638	17.0178	16.8209	16.8949	16.8854	14.9088	16.4026	16.6022	17.4246	14.9761	16.5813	16.8599	15.4348	16.8536
Ubl4b	0	0	0	0.0449592	0.0341045	0.0324175	0	0	0	0	0.0277616	0	0	0	0
Itga2	0.0275306	0.0187744	0.0406231	0.0262544	0.0199157	0.0662569	0.0407349	0.0114097	0.0250979	0.0157904	0.0486351	0.0175239	0.0435785	0.0173855	0.0319952
Hadh	12.4764	13.4688	10.1232	15.9415	12.6785	12.3792	13.4378	12.1441	12.1549	11.2785	13.1292	13.6732	15.6754	13.1083	9.40135
DQ703064	0	0	0	0	0	0	0	0	0	0	0	0	0	0	0
AB341082	0	0	0	0	0	0	0	0	0	0	0	0	0	0	0
Kri1	8.20755	9.1607	8.72979	8.72645	8.76785	9.00964	6.06149	8.16086	8.81532	9.25459	9.1671	9.47589	8.75159	9.13442	9.3705
Gnptab	15.3606	15.8488	16.417	14.8734	15.7337	16.4513	15.5088	15.9538	16.0617	16.112	15.5267	14.8349	13.9765	14.9168	16.1723
AK076605	0.0177951	0.12742	0.0787732	0.0890934	0.0965475	0.0734174	0.0987375	0.132749	0.0648906	0.0918585	0.110028	0.0679619	0.118306	0.0842818	0.0310213
Mcidas	0	0.113916	0.0758421	0.0245081	0.018591	0.0706856	0.0380254	0.0213015	0.0520634	0.0442203	0.0529669	0.0327166	0.0325439	0.0649166	0.0336004
DQ714268	0	0	0	0	0	0	0	0	0	0	0	0	0	0	0
Tgfbr3	2.44985	3.28551	3.61863	3.59452	3.14355	4.50805	2.91436	3.46875	4.26581	4.20706	4.37238	3.9566	4.12115	2.84559	2.71174
Tgfbr2	4.38698	5.37634	4.33238	6.04714	5.31922	7.87787	5.17629	5.25585	5.83564	4.63156	7.52488	6.3559	8.59623	4.10869	4.04435
Chml	1.3583	1.51052	1.45078	1.25225	1.2305	1.793	1.37595	1.74301	1.6302	1.62959	1.28783	1.54079	1.67468	1.19811	1.52607
4930581F22Rik	0.236476	0.690553	0.270119	0.495246	0.339521	0.325638	0.430384	0.46959	0.36234	0.308662	0.229809	0.291632	0.346065	0.65996	0.57155
Cyp2c37	0	0	0	0	0	0	0	0	0	0	0	0	0	0	0
Alg11	7.77745	8.20371	7.94692	8.22623	7.76741	7.85751	8.76142	8.12346	7.81668	8.05092	7.9898	7.64543	7.84131	7.12757	7.72052
Cyp2c39	0	0	0	0	0	0	0	0	0	0	0	0	0	0	0
Cyp2c38	0	0	0	0	0	0	0	0	0	0	0	0	0	0	0
Alg14	8.92188	9.49995	7.62172	10.3368	7.52979	7.4264	8.22168	10.0547	8.18108	7.99003	9.30928	9.26572	10.1088	9.78564	8.95894
AK047163	1.09502	1.61636	1.39489	1.23139	1.35181	1.1076	1.42725	1.40809	1.10989	1.1382	1.16295	1.53509	1.10251	1.55555	1.11054
6430550D23Rik	0.107157	0.21879	0.166105	0.168452	0.200443	0.138158	0.0891852	0.399692	0.100647	0.253528	0.189462	0.179047	0.178103	0.0836302	0.153902
DQ705435	0	0	0	0	0	0	0	0	0	0	0	0	0	0	0
DQ541300	0	0	0	0	0	0	0	0	0	0	0	0	0	0	0
Nwd1	11.8661	12.4769	13.1319	13.7205	11.0908	12.6546	13.7402	13.362	12.5533	11.8283	12.8873	12.1501	12.9421	6.96234	12.4093
DQ551154	0	0	0	0	0	0	0	0	0	0	0	0	0	0	0
Gm8765	0	0	0	0	0	0	0	0.00788268	0	0	0.0168004	0	0.012043	0	0
Rhbdl1	20.1647	20.2892	20.6778	21.86	19.1047	19.0393	17.34	19.4616	20.4143	20.2359	17.2282	18.4125	23.8543	24.4691	18.6311
AK080422	0	0	0	0	0	0	0	0	0	0	0	0	0	0	0
Tpcn2	0.457704	1.11312	0.657029	0.837276	0.776145	0.858698	0.386835	0.63589	0.783166	0.650247	0.795565	0.648392	0.971557	0.93802	0.499909
[truncated: 30,698 more rows]
