# Supplementary material for: Dietary Restriction and Rapamycin Affect Brain Aging in Mice by Attenuating Age-Related DNA Methylation Changes
Source: Genes (Basel). 2022 Apr 15;13(4):699. doi: 10.3390/genes13040699 (PMC9030181; doi:10.3390/genes13040699)
Supplement: Supplementary file 1 [file genes-13-00699-s001.zip › Supplementary File S3 - CpG_methylation_level.txt]

chrome	site	index	pattern	young1	young2	young3	old1	old2	old3	DR1	DR2	DR3	RALL1	RALL2	RALL3	RDRL1	RDRL2	RDRL3
chr1	C	3020877	CG	0.89	0.97	0.97	0.98	0.94	0.99	0.97	0.94	0.98	0.97	0.99	0.9	0.92	1	1
chr1	C	3020891	CG	0.96	0.9	0.95	0.95	0.88	0.92	0.96	0.94	0.93	0.98	0.82	0.98	0.87	0.93	0.94
chr1	G	3020946	CG	0.65	0.7	0.74	0.71	0.75	0.65	0.75	0.72	0.8	0.8	0.65	0.74	0.83	0.74	0.63
chr1	G	3020972	CG	0.87	0.89	0.68	0.69	0.79	0.82	0.94	0.86	0.78	0.84	0.67	0.44	1	0.84	0.68
chr1	G	3020988	CG	0.97	0.95	0.89	0.89	0.98	0.89	0.97	1	0.98	0.86	0.92	1	1	0.91	1
chr1	G	3021013	CG	1	0.91	0.93	0.97	0.89	0.97	1	1	0.91	1	1	0.69	1	0.97	0.87
chr1	C	3037802	CG	0.96	0.89	0.95	0.89	0.81	0.89	0.99	0.96	0.86	0.76	0.93	1	1	1	1
chr1	C	3037820	CG	0.89	0.82	0.82	0.9	0.85	0.89	0.96	0.95	0.84	0.88	0.93	1	0.67	0.77	0.88
chr1	C	3037825	CG	1	1	0.98	1	0.98	0.98	0.95	0.99	0.98	0.79	0.97	1	1	1	0.96
chr1	C	3037827	CG	0.91	0.81	0.65	0.85	0.89	0.87	0.82	0.74	0.86	0.56	0.77	0.83	1	0.89	0.88
chr1	C	3037845	CG	0.89	0.98	0.93	0.89	0.86	0.97	0.99	0.96	0.95	0.9	0.76	0.96	1	0.94	1
chr1	C	3121587	CG	0.73	0.35	0.31	0.4	0.2	0	0.39	0.07	0.18	0.3	0.43	0.27	0.14	0.33	0.29
chr1	G	3143189	CG	0.78	0.75	0.85	0.8	0.89	0.85	0.78	0.85	0.86	0.88	0.84	0.96	1	0.5	1
chr1	C	3147799	CG	1	1	1	0.94	1	0.88	0.74	1	1	0.8	1	0.75	1	1	1
chr1	C	3147811	CG	1	1	1	1	0.94	0.94	0.95	0.83	0.77	0.9	1	0.92	1	1	1
chr1	C	3147838	CG	1	1	1	1	0.97	1	1	1	1	1	1	0.71	0.98	1	0.97
chr1	C	3147841	CG	0.91	1	0.86	0.94	0.83	1	0.94	0.83	0.78	0.94	1	0.77	0.95	1	0.93
chr1	C	3150008	CG	0.79	0.79	0.74	0.83	0.81	0.78	0.83	0.88	0.79	0.71	0.78	0.78	0.91	0.8	0.8
chr1	C	3150022	CG	0.63	0.88	0.75	0.65	0.77	0.73	0.82	0.7	0.71	0.73	0.69	0.82	0.91	0.53	0.68
chr1	G	3301941	CG	0.14	0.07	0	0	0.04	0.38	0.17	0	0.22	0.32	0	0	0.1	0.17	0.25
chr1	C	3301969	CG	1	0.89	0.6	1	0.88	0.78	0.94	1	0.92	1	1	1	0.83	0.82	0.8
chr1	G	3301970	CG	0.85	0.85	0.56	0.8	0.79	0.32	0.5	0.4	0.6	0.76	0.47	0.37	0.8	0.7	0.5
chr1	C	3301978	CG	1	1	1	1	1	0.5	0.89	0.8	0.92	1	1	1	0.83	0.91	1
chr1	G	3301979	CG	0.69	0.94	0.81	0.92	0.81	0.78	0.9	0.57	0.92	0.88	0.86	0.9	1	1	0.88
chr1	G	3301986	CG	1	0.92	0.95	1	1	0.87	1	0.85	0.95	0.95	0.94	1	1	1	1
chr1	G	3337153	CG	0.96	0.95	0.96	0.98	0.99	0.95	0.96	0.98	0.97	0.97	1	0.94	0.93	0.95	0.95
chr1	G	3344743	CG	0.9	0.87	0.86	0.89	0.89	0.88	0.85	0.8	0.84	0.87	0.83	0.82	0.84	0.9	0.89
chr1	G	3344763	CG	0.92	0.89	0.88	0.93	0.9	0.89	0.84	0.83	0.86	0.85	0.84	0.84	0.9	0.91	0.91
chr1	G	3344778	CG	0.94	0.93	0.92	0.96	0.93	0.9	0.89	0.9	0.88	0.91	0.91	0.91	0.94	0.95	0.95
chr1	G	3344789	CG	0.95	0.95	0.96	0.96	0.96	0.96	0.98	0.95	0.95	0.95	0.97	0.94	0.94	0.94	0.96
chr1	G	3509851	CG	0.93	0.91	0.83	0.95	0.79	0.9	0.86	0.93	0.86	0.97	0.98	0.94	0.95	1	0.89
chr1	C	3567542	CG	0	0	0	0	0	0	0	0	0	0	0	0	0	0	0
chr1	C	3584304	CG	1	1	1	1	0.88	0.88	1	1	1	1	0.92	1	1	1	1
chr1	C	3584309	CG	1	1	1	1	1	1	0.71	0.67	1	0.7	1	1	1	1	1
chr1	C	3584341	CG	0	0	0	0	0	0	0	0	0	0	0	0	0	0	0
chr1	C	3622136	CG	0.93	0.97	0.94	0.89	0.89	0.89	0.89	0.98	0.73	0.95	0.79	0.92	0.55	0.95	0.86
chr1	G	3622217	CG	0.9	0.99	0.96	1	0.94	0.97	0.9	0.96	1	0.98	0.98	0.93	0.77	1	1
chr1	C	3622256	CG	0.97	0.99	0.98	0.98	0.99	0.98	0.96	0.98	0.97	0.96	0.93	0.99	1	0.96	0.99
chr1	G	3622257	CG	1	0.98	0.96	0.99	0.99	0.95	0.95	0.98	0.99	0.94	0.95	1	1	0.93	0.9
chr1	G	3622311	CG	0.87	0.89	0.85	0.92	0.84	0.94	0.91	0.84	0.88	0.85	0.76	0.75	0.82	0.9	0.88
chr1	G	3622341	CG	0.85	0.89	0.79	0.85	0.83	0.88	0.87	0.83	0.94	0.74	0.73	0.77	0.84	0.8	0.9
chr1	C	3670645	CG	0	0.01	0.07	0.02	0.05	0.11	0.12	0.02	0.09	0.02	0.12	0.09	0.07	0.02	0
chr1	C	3670655	CG	0	0.01	0	0	0.01	0.01	0.01	0	0	0	0.11	0	0.05	0.06	0
chr1	C	3670670	CG	0.01	0.03	0	0	0.01	0	0	0	0	0.02	0.1	0	0.07	0	0.04
chr1	C	3670682	CG	0	0.01	0.04	0.01	0.03	0	0	0.01	0.02	0	0	0	0.05	0	0
chr1	C	3670685	CG	0.01	0	0.03	0.01	0.01	0.03	0.03	0	0.02	0	0	0.09	0	0.04	0
chr1	G	3670704	CG	0	0.01	0.04	0	0.01	0.02	0	0.01	0	0	0.07	0	0	0	0
chr1	G	3670723	CG	0	0	0.06	0	0.04	0	0	0.04	0.02	0.07	0.07	0	0	0.03	0
chr1	G	3670726	CG	0	0	0	0.01	0	0	0	0	0.02	0	0.07	0	0.13	0	0
chr1	G	3670736	CG	0.01	0.02	0	0.01	0.01	0	0	0.01	0	0	0.03	0	0.02	0	0
chr1	G	3670743	CG	0	0.01	0.03	0	0.01	0.02	0.01	0.01	0.01	0.02	0	0	0	0	0
chr1	G	3670752	CG	0.09	0.04	0.06	0.06	0.05	0.03	0.13	0.05	0.03	0.07	0.02	0	0	0.03	0.06
chr1	C	3670776	CG	0.86	1	1	1	0.86	0.92	1	1	1	0.8	0.75	0.77	1	1	1
chr1	C	3671095	CG	0.07	0.05	0.04	0	0.02	0.03	0.13	0.03	0	0.02	0.17	0	0.2	0.05	0.04
chr1	C	3671099	CG	0.02	0	0	0	0.01	0.06	0.05	0.02	0.01	0	0	0	0	0	0.08
chr1	G	3671100	CG	0	0	0	0	0	0	0	0	0	0	0	0	0	0	0
chr1	C	3671102	CG	0	0.03	0	0.01	0.01	0.06	0	0.01	0.05	0.02	0.13	0	0	0	0
chr1	G	3671103	CG	0	0.07	0	0	0.05	0	0.07	0.13	0	0.14	0.4	0.4	0.08	0	0.17
chr1	C	3671105	CG	0.02	0	0	0.09	0.01	0.04	0	0	0	0	0.13	0	0	0.05	0
chr1	C	3671109	CG	0	0	0	0	0.01	0.04	0.03	0	0	0	0.14	0	0.08	0	0
chr1	G	3671110	CG	0	0	0.08	0.1	0.1	0	0	0	0	0.11	0.4	0.14	0	0	0
chr1	C	3671114	CG	0	0.05	0	0	0.01	0	0	0	0	0	0.02	0.03	0	0.03	0
chr1	C	3671118	CG	0	0	0	0	0.01	0.04	0.02	0.03	0.01	0	0.14	0	0	0	0
chr1	C	3671124	CG	0	0	0	0	0	0.03	0.02	0.02	0.07	0.08	0.14	0.04	0	0	0
chr1	C	3671127	CG	0	0	0	0	0	0.05	0	0.02	0	0.02	0.14	0	0	0	0
chr1	C	3671132	CG	0	0	0	0	0.03	0.02	0	0.02	0	0.02	0.02	0	0	0	0.02
chr1	G	3671133	CG	0	0.02	0.06	0	0.02	0	0.02	0.01	0.01	0	0.02	0.02	0.24	0.02	0
chr1	C	3671135	CG	0	0.02	0	0	0	0.05	0.02	0.04	0.01	0.02	0.19	0	0	0.03	0
chr1	G	3671136	CG	0	0	0	0.01	0.03	0.02	0.01	0	0.01	0.01	0.09	0.02	0.24	0	0.02
chr1	C	3671142	CG	0	0	0	0.02	0.04	0.02	0	0.01	0.01	0.02	0.17	0	0	0	0
chr1	G	3671143	CG	0	0	0.01	0	0	0	0	0.01	0	0	0.1	0	0.24	0	0
chr1	C	3671144	CG	0	0.02	0	0	0	0.02	0	0.01	0	0	0	0.08	0	0	0
chr1	G	3671145	CG	0.06	0.01	0	0.01	0.01	0.04	0	0	0.02	0.06	0.08	0	0.24	0	0
chr1	G	3671162	CG	0	0	0.01	0	0.02	0.02	0.02	0.01	0.01	0	0.01	0.01	0.02	0	0.01
chr1	G	3671164	CG	0	0	0	0	0.01	0	0.02	0.01	0	0	0.02	0	0.05	0.01	0.01
chr1	G	3671175	CG	0.03	0.01	0	0.01	0.03	0	0.05	0	0.01	0	0.06	0	0	0.02	0.09
chr1	G	3671178	CG	0.02	0.03	0	0	0.01	0	0	0	0	0	0.07	0	0	0.02	0
chr1	G	3671182	CG	0.06	0.11	0.01	0.06	0.08	0.1	0.07	0.01	0.01	0.04	0.15	0.09	0.12	0.02	0
chr1	C	3671447	CG	0.02	0	0.05	0.06	0.05	0	0	0	0.12	0.14	0.1	0	0	0.03	0
chr1	C	3671451	CG	0	0.04	0	0	0.01	0.05	0.03	0	0	0	0	0	0	0	0
chr1	C	3671453	CG	0	0	0	0	0	0.11	0	0	0	0	0	0	0	0	0
chr1	C	3671456	CG	0	0	0	0	0	0	0.03	0	0.03	0	0	0	0	0	0
chr1	C	3671478	CG	0	0	0	0	0.01	0	0	0	0	0	0	0	0	0	0
chr1	G	3671479	CG	0	0.17	0.13	0	0.01	0	0	0.12	0	0	0.23	0	0	0	0
chr1	C	3671482	CG	0	0	0.12	0	0	0	0	0	0	0	0	0	0	0	0
chr1	G	3671483	CG	0	0	0	0	0.03	0	0	0	0.15	0	0.1	0	0	0.1	0
chr1	C	3671486	CG	0	0	0	0	0.03	0	0	0	0	0.24	0	0	0.06	0.08	0
chr1	G	3671487	CG	0.03	0	0	0	0.02	0	0	0.04	0	0	0.09	0	0	0	0
chr1	C	3671490	CG	0	0	0	0	0	0	0	0	0	0	0	0.12	0.03	0.04	0
chr1	G	3671491	CG	0	0	0	0.05	0	0.03	0	0	0	0	0.13	0	0	0	0
chr1	C	3671493	CG	0	0.14	0	0	0.05	0	0	0	0	0	0	0	0	0	0
chr1	G	3671494	CG	0	0	0	0	0.04	0	0	0	0	0	0.22	0	0.08	0	0
chr1	C	3671496	CG	0	0	0	0	0.01	0	0	0	0	0	0	0	0	0	0
chr1	G	3671497	CG	0	0.04	0	0	0.05	0	0	0	0	0	0.23	0	0	0	0
chr1	G	3671501	CG	0	0.07	0	0	0	0.03	0	0	0	0.04	0.12	0	0.07	0	0
chr1	G	3671503	CG	0	0	0	0	0	0	0	0	0	0.04	0.12	0	0	0	0
chr1	G	3671513	CG	0	0	0.03	0	0	0	0.06	0.09	0.03	0.1	0	0.13	0	0	0
chr1	C	3671521	CG	0.06	0.11	0.03	0.11	0.05	0.05	0.13	0.11	0.06	0.16	0	0	0.03	0.13	0.03
chr1	G	3671522	CG	0.05	0.07	0.03	0.14	0.17	0.03	0	0	0.03	0.21	0.19	0	0	0	0
chr1	C	3671529	CG	0	0	0	0	0.01	0	0	0.02	0.03	0	0	0.03	0	0.01	0
chr1	C	3671533	CG	0	0.01	0	0	0.03	0	0	0.06	0	0	0	0	0.09	0	0
chr1	C	3671537	CG	0	0.01	0.02	0.01	0.02	0	0	0	0	0.01	0	0.03	0	0.01	0
chr1	C	3671544	CG	0.02	0.01	0	0	0	0	0	0.01	0	0	0	0	0.11	0	0
chr1	G	3671545	CG	0	0	0	0	0	0.01	0.02	0.02	0.01	0.01	0	0	0	0.03	0
chr1	C	3671552	CG	0	0	0	0.01	0.01	0	0	0	0.01	0	0.02	0	0	0	0
chr1	G	3671553	CG	0	0	0.03	0	0.01	0.05	0	0.01	0	0	0.06	0	0	0	0.01
chr1	C	3671555	CG	0	0	0.02	0.02	0.05	0	0	0	0	0	0	0	0	0.05	0
chr1	G	3671556	CG	0.01	0	0.05	0.02	0	0	0	0	0	0	0	0	0.03	0	0
chr1	C	3671569	CG	0.01	0.02	0	0	0.02	0.01	0.01	0.08	0.01	0	0.12	0	0	0.01	0.01
chr1	G	3671570	CG	0.01	0	0.01	0	0	0	0.03	0	0	0.01	0	0	0	0.03	0.01
chr1	G	3671573	CG	0.01	0	0.01	0.02	0	0.02	0	0	0.03	0	0.04	0	0	0	0
chr1	G	3671587	CG	0	0	0	0.02	0	0.01	0.01	0	0.03	0	0	0	0	0	0
chr1	G	3671589	CG	0	0.03	0.07	0.02	0.02	0	0	0	0	0.03	0	0	0	0	0
chr1	C	3671591	CG	0	0.03	0	0	0.15	0	0	0	0.04	0.04	0	0	0	0	0
chr1	G	3671592	CG	0	0.03	0.09	0.04	0.06	0.05	0.05	0.03	0.11	0	0.1	0.06	0.09	0.04	0.03
chr1	C	3671596	CG	0	0	0.04	0.03	0	0	0	0	0	0	0	0	0	0	0
chr1	G	3671597	CG	0	0.02	0	0	0	0	0.06	0.18	0	0	0.05	0	0	0	0
chr1	C	3671598	CG	0	0	0	0	0.02	0	0	0	0	0	0	0	0	0	0
chr1	G	3671599	CG	0	0.05	0	0	0.01	0	0	0	0	0	0	0	0	0	0
chr1	C	3671600	CG	0	0	0	0	0.02	0	0	0	0.07	0.07	0	0.05	0	0	0
chr1	G	3671601	CG	0	0	0	0	0.01	0	0	0	0.06	0	0	0	0	0	0
chr1	C	3671602	CG	0	0	0	0	0	0.04	0	0	0	0	0	0	0.11	0	0
chr1	G	3671603	CG	0	0.02	0	0	0	0.03	0	0	0	0	0	0	0	0.06	0.03
chr1	C	3671615	CG	0	0	0	0	0	0	0	0	0	0.04	0	0	0	0	0
chr1	G	3671616	CG	0	0	0	0	0	0.06	0	0	0	0	0	0	0	0	0
chr1	C	3671619	CG	0	0	0.04	0.03	0	0	0	0	0	0	0	0	0	0	0
chr1	G	3671620	CG	0	0	0	0	0.02	0.03	0.05	0	0	0	0	0	0	0	0
chr1	C	3671621	CG	0	0.03	0	0	0	0	0	0	0	0	0	0	0	0	0
chr1	G	3671622	CG	0	0	0	0.06	0	0.03	0	0	0	0	0	0	0	0.14	0.03
chr1	C	3671626	CG	0	0	0	0	0	0	0.03	0	0	0	0	0.29	0	0	0
chr1	G	3671627	CG	0	0	0	0	0.02	0.03	0	0	0	0	0	0	0	0.05	0
chr1	C	3671628	CG	0	0	0	0	0	0	0	0	0	0	0	0	0	0	0
chr1	G	3671629	CG	0	0.02	0	0	0	0.06	0	0	0	0	0	0	0	0.03	0
chr1	C	3671631	CG	0	0	0	0	0.07	0	0	0	0	0	0	0	0	0	0
chr1	G	3671632	CG	0.06	0.19	0	0.13	0.11	0.06	0	0	0.06	0	0	0.33	0	0	0
chr1	C	3671636	CG	0.88	0.97	0.96	1	0.95	0.92	1	0.95	1	0.85	1	1	1	1	1
chr1	G	3671656	CG	0	0	0	0	0	0	0.11	0	0.07	0	0	0	0	0	0
chr1	G	3671661	CG	0	0	0	0.08	0	0	0	0.06	0.13	0	0	0	0	0	0
chr1	G	3671664	CG	0	0	0	0	0	0	0	0	0.06	0	0	0	0	0	0
chr1	G	3671667	CG	0	0	0	0.07	0	0	0	0	0	0	0	0	0	0.14	0
chr1	G	3671670	CG	0	0	0	0.13	0	0	0	0	0.06	0	0	0	0	0	0
chr1	G	3746874	CG	0.95	0.98	0.97	0.96	0.97	0.93	0.95	0.97	0.92	0.96	0.96	0.99	1	0.98	0.95
chr1	C	3819405	CG	0.98	1	0.97	0.9	1	1	1	1	0.98	1	0.97	0.98	0.97	0.92	1
chr1	G	3819406	CG	0.13	0	0	0	0	0.11	0	0	0	0	0	0	0	0	0
chr1	C	3819435	CG	0.9	0.92	0.89	0.91	0.87	0.76	0.73	0.95	0.92	0.86	0.71	0.93	0.91	0.96	0.88
chr1	G	3819436	CG	1	1	0.96	0.63	0.93	0.89	1	1	0.87	0.93	0.77	1	1	1	0.97
chr1	C	3819454	CG	0	0	0	0	0.14	0	0	0	0	0	0	0	0	0	0
chr1	G	3819455	CG	0.38	0.5	0.48	0.71	0.73	0.63	0.38	0.43	0.55	0.27	0.32	0.76	0.43	1	0.4
chr1	C	3847814	CG	0.86	0.93	0.92	1	0.99	0.99	0.98	0.93	0.99	0.96	0.98	0.97	0.96	0.94	0.99
chr1	C	3852753	CG	0.36	0.4	0.33	0.43	0.38	0.5	0.4	0.4	0.14	0.18	0.13	0	0.33	0.31	0.29
chr1	C	3931004	CG	0.95	1	1	1	0.85	0.94	1	1	1	1	0.88	1	1	1	0.98
chr1	C	3934417	CG	0.85	0.94	0.9	0.94	0.91	0.94	0.86	0.81	0.88	0.91	0.94	0.82	0.93	0.95	0.91
chr1	G	3934478	CG	0.78	0.95	0.86	0.91	0.78	0.92	1	0.91	0.77	0.8	0.78	0.69	0.81	0.67	0.83
chr1	G	3934515	CG	1	0.93	0.88	0.95	0.93	1	1	1	0.87	0.77	1	1	0.97	1	0.96
chr1	G	3934521	CG	1	0.87	0.97	1	0.91	1	1	0.91	0.95	1	1	1	0.88	1	0.85
chr1	C	3965737	CG	0.54	0.62	0.59	0.54	0.55	0.34	0.43	0.55	0.57	0.61	0.42	0.77	0.61	0.55	0.6
chr1	G	3965842	CG	0.96	0.96	0.92	0.97	0.97	0.93	0.99	0.96	0.93	0.96	0.95	0.98	0.93	0.98	0.96
chr1	C	3987469	CG	0.72	0.8	0.71	0.81	0.76	0.8	0.78	0.78	0.69	0.83	0.86	0.8	0.69	0.63	0.8
chr1	G	3987506	CG	0.88	0.86	0.9	0.91	0.8	0.83	0.88	0.76	0.94	0.7	0.83	0.73	1	0.94	0.71
chr1	C	4039093	CG	0.78	0.88	0.7	1	0.67	0.8	0.94	0.83	1	0.6	0.7	0.87	0.9	1	0.9
chr1	G	4076450	CG	0.83	0.89	1	0.96	1	0.94	0.89	0.89	0.85	0.87	0.73	1	0.86	0.78	0.86
chr1	G	4106516	CG	0.65	0.82	0.78	0.67	0.69	0.73	0.79	0.78	0.79	0.78	0.78	0.82	0.95	0.62	0.73
chr1	C	4187706	CG	0.76	0.83	0.71	0.6	0.72	0.7	0.96	0.83	0.86	1	1	0.83	1	1	1
chr1	C	4187723	CG	0.69	0.76	0.67	0.89	0.8	0.74	0.54	0.68	0.86	0.65	0.5	0.5	0.83	0.8	0.85
chr1	C	4187889	CG	1	0.93	0.95	0.95	0.91	0.88	0.9	0.96	0.92	0.98	0.93	0.96	1	0.89	0.91
chr1	C	4187911	CG	0.9	0.94	0.95	0.85	0.91	0.89	0.8	0.9	0.9	0.94	0.86	0.82	0.65	0.85	0.87
chr1	C	4187922	CG	0.93	0.93	0.95	0.87	0.93	0.91	0.91	0.91	0.89	0.96	0.87	0.9	0.95	0.89	0.87
chr1	G	4187998	CG	0.94	0.97	0.97	0.89	0.98	0.97	0.88	0.97	0.98	0.84	0.99	1	1	0.99	1
chr1	C	4440615	CG	0.86	0.38	0.62	1	0.83	0.62	0.55	0.68	0.48	0.43	0.25	0.76	0.83	0.35	0.75
chr1	C	4440640	CG	0.78	0.71	0.78	0.67	0.89	0.4	0.46	0.83	0.71	0.56	0.33	0.6	0.91	0.61	0.7
chr1	C	4440658	CG	0.14	0	0	0.08	0.17	0.08	0	0	0.11	0.25	0.5	0.24	0	0	0
chr1	G	4445734	CG	0.82	0.89	0.74	0.74	0.74	0.81	0.44	0.75	0.53	0.67	0.64	0.56	0.83	0.63	0.68
chr1	C	4492154	CG	0	0.11	0	0.03	0.11	0.03	0.09	0.11	0.02	0.04	0.11	0.21	0	0.26	0.07
chr1	C	4492164	CG	0	0.02	0	0	0	0	0	0	0.05	0	0	0	0	0	0
chr1	C	4492177	CG	0	0.1	0	0	0.01	0	0	0.05	0	0.11	0	0	0.08	0	0.07
chr1	C	4492181	CG	0	0	0	0	0.04	0.03	0	0	0	0	0	0	0	0	0
chr1	C	4492189	CG	0	0.02	0	0	0.03	0	0.03	0	0	0	0.14	0.13	0.25	0	0
chr1	G	4492190	CG	0	0	0.02	0	0.04	0.26	0	0	0.05	0	0.39	0	0	0.02	0
chr1	G	4492206	CG	0	0	0	0	0.02	0	0	0.04	0	0	0.39	0	0	0	0
chr1	G	4492217	CG	0.03	0.17	0.02	0	0	0	0	0	0.03	0	0.06	0	0	0.07	0
chr1	G	4492232	CG	0	0.13	0.03	0.14	0.03	0.1	0.29	0.04	0.21	0	0.39	0	0	0.26	0.06
chr1	C	4492310	CG	0.05	0.07	0	0.06	0.09	0.06	0.05	0.02	0.13	0.02	0.01	0.13	0.02	0.1	0.04
chr1	C	4492330	CG	0	0.02	0	0.02	0.03	0	0	0	0.01	0	0.03	0.02	0	0.02	0.01
chr1	C	4492333	CG	0	0.01	0.01	0.01	0.02	0	0	0.03	0.01	0	0.03	0.02	0	0.03	0.01
chr1	C	4492337	CG	0	0	0	0	0.01	0.02	0	0.02	0	0	0.03	0.02	0	0	0
chr1	C	4492339	CG	0	0	0	0.01	0.01	0.02	0	0.01	0	0	0	0	0	0	0
chr1	C	4492345	CG	0	0.01	0	0	0.04	0	0.04	0.04	0.01	0.01	0.07	0	0	0	0.04
chr1	G	4492366	CG	0	0.03	0	0.04	0	0.08	0	0.1	0	0	0.13	0	0	0.14	0
chr1	G	4492386	CG	0.03	0	0	0	0.03	0.05	0.02	0.05	0.01	0	0	0	0	0.03	0
chr1	G	4492398	CG	0.08	0.03	0.03	0	0.05	0.04	0	0.12	0.07	0	0.05	0	0	0.16	0.05
chr1	G	4492406	CG	0	0.02	0.06	0	0.02	0.04	0.07	0.08	0.03	0	0.08	0.15	0	0.03	0
chr1	C	4492424	CG	0.13	0.08	0.06	0.13	0.05	0.07	0.04	0.12	0.08	0.06	0.01	0.06	0.1	0.09	0.05
chr1	C	4492456	CG	0	0.01	0.01	0	0.01	0	0	0	0	0.01	0	0	0.06	0	0.01
chr1	G	4492457	CG	0	0	0.01	0	0.03	0.03	0.01	0.03	0.01	0	0.01	0.02	0.01	0.01	0
chr1	C	4492458	CG	0.03	0	0.03	0.03	0.01	0.03	0	0.02	0	0.01	0	0	0.05	0	0.03
chr1	G	4492459	CG	0.04	0.01	0.03	0	0.02	0.02	0.02	0.02	0	0	0	0	0.01	0.1	0.03
chr1	C	4492462	CG	0.02	0.01	0.02	0.01	0.01	0.02	0	0.01	0.03	0.01	0.06	0	0.1	0	0.05
chr1	G	4492463	CG	0.03	0.01	0	0.01	0.05	0	0	0.01	0.03	0.03	0	0	0.03	0.01	0
chr1	C	4492468	CG	0.03	0.02	0.01	0	0.01	0.01	0	0	0	0.01	0	0	0.05	0	0.01
chr1	G	4492469	CG	0.01	0.03	0.01	0	0.01	0	0	0.04	0.01	0	0	0	0	0.01	0
chr1	G	4492479	CG	0.02	0.03	0.01	0.02	0.01	0	0.03	0.02	0.01	0.01	0	0	0	0	0.02
chr1	G	4492481	CG	0.04	0	0.03	0.04	0.03	0.03	0.04	0	0.01	0	0	0	0	0.04	0.05
chr1	G	4492484	CG	0.14	0.1	0.04	0.13	0.09	0.06	0.08	0.03	0.02	0.01	0.08	0.21	0.02	0.07	0.02
chr1	G	4492528	CG	0	0	0	0	0	0	0.06	0	0	0	0	0	0	0	0
chr1	G	4492537	CG	0	0	0	0	0.05	0	0	0	0	0	0	0	0	0	0
chr1	G	4492552	CG	0	0	0	0	0	0	0.11	0	0	0.09	0	0.03	0	0	0
chr1	G	4492555	CG	0	0	0	0	0.02	0	0	0	0	0	0	0	0	0	0
chr1	G	4492560	CG	0	0.05	0.1	0	0.02	0	0.06	0.15	0.13	0	0	0	0	0	0
chr1	G	4492564	CG	0	0	0	0	0.05	0	0	0.1	0	0	0	0	0	0	0
chr1	C	4492715	CG	0.01	0.08	0.1	0.08	0.11	0.19	0.07	0.06	0.09	0.09	0.05	0.13	0.08	0.07	0.03
chr1	C	4492754	CG	0.01	0	0.04	0.01	0	0.04	0.02	0.01	0.03	0	0	0	0.02	0.02	0.01
chr1	G	4492755	CG	0	0.01	0	0	0.03	0.01	0.01	0.01	0.01	0.04	0.01	0.03	0.01	0.01	0.03
chr1	G	4492772	CG	0.09	0.1	0.06	0.07	0.07	0.09	0.14	0.09	0.11	0.04	0.09	0.06	0.03	0.11	0.04
chr1	C	4492856	CG	0.17	0.11	0	0.1	0.13	0	0.18	0.11	0	0	0	0	0	0.29	0.29
chr1	G	4493342	CG	0.05	0	0	0	0.02	0.04	0	0	0	0	0.25	0.15	0	0	0
chr1	G	4493344	CG	0	0	0	0	0	0	0	0	0	0	0	0	0	0	0
chr1	G	4493351	CG	0	0.09	0.04	0.1	0.02	0.03	0	0.06	0.01	0	0.06	0	0	0.09	0.29
chr1	G	4493353	CG	0.23	0.02	0	0.06	0.07	0	0	0.04	0.17	0	0	0	0.38	0	0
chr1	G	4493358	CG	0.23	0.02	0.23	0.15	0.09	0.1	0	0.17	0.09	0	0	0.27	0.38	0	0.29
chr1	C	4493616	CG	0.1	0.05	0.05	0.06	0.06	0.12	0.06	0.12	0.09	0.13	0.13	0.06	0.12	0.08	0.16
chr1	C	4493621	CG	0.01	0	0.01	0	0.01	0.06	0.04	0.02	0.03	0.04	0.07	0.06	0.06	0	0.04
chr1	C	4493623	CG	0.01	0.02	0.01	0.01	0.01	0.02	0.02	0.04	0.03	0	0.04	0	0.03	0.01	0.03
chr1	G	4493624	CG	0.01	0	0.02	0	0.01	0	0	0	0	0	0.11	0	0.03	0.02	0.02
chr1	C	4493644	CG	0	0	0.01	0.01	0	0.03	0	0.05	0.01	0	0.04	0	0.02	0.01	0.03
chr1	G	4493645	CG	0.01	0.01	0.03	0	0.01	0.02	0.01	0.01	0	0	0.13	0.01	0	0	0
chr1	C	4493646	CG	0.02	0.01	0.01	0.02	0.01	0	0.03	0.03	0.01	0	0.04	0	0.02	0.02	0.04
chr1	G	4493647	CG	0	0	0	0.01	0.02	0	0.02	0.02	0	0	0.09	0	0	0.07	0.01
chr1	C	4493656	CG	0.02	0	0.01	0.02	0.02	0	0.01	0.01	0.04	0.01	0.03	0.01	0.04	0	0.06
chr1	G	4493657	CG	0	0	0.01	0	0.02	0	0	0.01	0.02	0	0.09	0	0.03	0.04	0.01
chr1	C	4493661	CG	0.01	0.04	0.02	0	0.04	0	0	0.07	0.04	0	0.07	0	0.04	0.01	0.07
chr1	G	4493662	CG	0.02	0.01	0	0.01	0.01	0.01	0	0	0.01	0.06	0.09	0.05	0.03	0.01	0.04
chr1	G	4493668	CG	0.01	0	0.01	0.06	0.03	0.05	0.07	0.04	0.03	0	0.08	0.01	0.03	0	0
chr1	C	4493672	CG	0.03	0.12	0.02	0.02	0.07	0.03	0.03	0.01	0.01	0	0.03	0.11	0.04	0.11	0.01
chr1	G	4493673	CG	0.06	0.08	0.08	0.09	0.05	0.13	0.06	0.06	0.11	0.08	0.11	0.13	0.08	0.09	0.11
chr1	C	4493694	CG	0.07	0	0.03	0.02	0	0.06	0.04	0.02	0.09	0.03	0.01	0.02	0.17	0.02	0.04
chr1	C	4493710	CG	0.01	0.01	0	0	0	0	0	0.03	0	0.03	0	0	0.09	0	0
chr1	G	4493711	CG	0.01	0.02	0.01	0.01	0	0.01	0.03	0.01	0.01	0.02	0	0	0	0	0
chr1	G	4493731	CG	0	0.02	0	0	0.01	0.05	0.01	0.04	0	0.01	0	0	0.06	0	0
chr1	C	4493748	CG	0	0	0.2	0.12	0	0	0	0.04	0.1	0	0.04	0	0.44	0	0
chr1	G	4493749	CG	0.06	0.06	0.06	0.11	0.07	0.15	0.15	0.09	0.04	0.07	0.11	0.07	0.07	0.1	0.05
chr1	G	4493795	CG	0.15	0	0.04	0	0	0	0	0.16	0.02	0.05	0.09	0.08	0.41	0	0.02
chr1	C	4496988	CG	0.02	0.04	0.09	0.09	0.07	0.06	0.03	0.03	0.06	0.03	0.11	0.09	0.05	0.1	0.06
chr1	C	4496991	CG	0.04	0.02	0.03	0.05	0.01	0.03	0.08	0.02	0.06	0.02	0.03	0.05	0.1	0.1	0.05
chr1	C	4497028	CG	0	0.01	0.03	0.01	0.04	0.06	0.04	0.05	0.04	0	0.07	0.06	0.1	0.03	0.09
chr1	G	4497041	CG	0.03	0.05	0.02	0.03	0.06	0.02	0.02	0.01	0.01	0.02	0.05	0	0.02	0.02	0.03
chr1	G	4497070	CG	0.04	0.03	0.02	0.07	0.02	0.08	0.1	0.02	0.04	0.02	0.06	0	0.07	0.03	0.01
chr1	G	4497074	CG	0.05	0.01	0.03	0.07	0.03	0.04	0.08	0.02	0.03	0	0.06	0.05	0.1	0.02	0.01
chr1	G	4497077	CG	0	0.01	0.02	0.03	0.04	0.07	0.02	0.02	0.03	0.02	0.05	0	0.07	0.04	0
chr1	C	4497083	CG	0.07	0.06	0.1	0.1	0.06	0.14	0.08	0.03	0.08	0.14	0.15	0.1	0.15	0.06	0.07
chr1	G	4497084	CG	0.03	0.05	0.05	0.04	0.08	0.08	0.14	0.04	0.08	0.01	0.09	0	0.1	0.05	0.08
chr1	C	4497090	CG	0.02	0.04	0.05	0.01	0.06	0.03	0.03	0.03	0.06	0.02	0.06	0.03	0.07	0.02	0.01
chr1	C	4497111	CG	0	0.02	0.03	0.02	0.03	0.02	0.02	0.03	0.05	0.04	0	0.03	0.07	0.03	0.04
chr1	G	4497112	CG	0.02	0.01	0.02	0.01	0.02	0.03	0.01	0.02	0.02	0.02	0.09	0.02	0.03	0.03	0.07
chr1	C	4497118	CG	0.03	0.01	0.03	0.06	0.04	0.02	0.01	0.09	0.06	0.01	0.13	0.11	0.02	0.01	0.05
chr1	G	4497119	CG	0.03	0.02	0.02	0.03	0.04	0.06	0.02	0.08	0.06	0.02	0.13	0.01	0.1	0.03	0.02
chr1	C	4497123	CG	0.02	0.08	0	0.03	0.02	0.04	0.02	0.06	0.08	0.07	0.07	0.03	0.02	0	0.04
chr1	G	4497124	CG	0.04	0.03	0.03	0.02	0.05	0.08	0.09	0.06	0.02	0.01	0.11	0.02	0.03	0.11	0
chr1	C	4497127	CG	0.02	0.01	0	0.02	0.02	0.01	0	0.04	0	0	0.1	0.01	0.09	0.05	0.03
chr1	G	4497128	CG	0.02	0.02	0.02	0.04	0.04	0.04	0.09	0.01	0.02	0.03	0.08	0.01	0.04	0.03	0
chr1	G	4497146	CG	0.11	0.08	0.05	0.11	0.07	0.09	0.09	0.08	0.06	0.14	0.13	0.03	0.07	0.08	0.07
chr1	C	4523484	CG	0.98	0.99	0.96	0.97	0.96	0.95	0.97	0.94	0.94	0.94	0.97	0.95	0.97	0.94	0.96
chr1	G	4523573	CG	0.95	0.91	0.9	0.84	0.92	0.82	0.97	0.92	0.91	0.94	0.81	0.9	0.8	0.95	0.9
chr1	C	4553704	CG	0.81	0.82	0.82	0.88	0.81	0.89	0.87	0.83	0.81	0.87	0.76	0.87	0.7	0.77	0.79
chr1	C	4553746	CG	0.91	0.89	0.93	0.92	0.92	0.96	1	0.94	0.92	0.9	0.96	0.92	0.8	0.82	0.93
chr1	G	4553747	CG	0.87	0.86	0.9	0.86	0.85	0.86	0.85	0.87	0.85	0.84	0.96	0.93	0.93	0.86	0.89
chr1	C	4553752	CG	0.92	0.97	0.94	0.94	0.93	1	1	0.92	0.94	0.96	0.98	0.8	0.71	0.93	0.95
chr1	G	4553753	CG	0.88	0.91	0.9	0.92	0.9	0.94	0.79	0.87	0.9	0.92	0.9	0.96	0.84	0.93	0.91
chr1	G	4553779	CG	0.75	0.74	0.76	0.79	0.73	0.54	0.63	0.81	0.72	0.69	0.74	0.76	0.67	0.74	0.78
chr1	G	4567101	CG	0.82	0.75	0.7	0.67	0.72	0.88	0.83	0.87	0.81	0.76	0.83	0.76	0.6	0.73	1
chr1	G	4567104	CG	0.24	0.25	0.21	0	0.17	0.13	0.53	0.57	0.45	0.5	0.41	0.29	0.6	0.36	0.38
chr1	G	4567110	CG	0.83	1	0.73	0.88	0.73	0.71	0.93	0.89	0.77	0.81	1	0.86	0.88	0.86	0.89
chr1	C	4571642	CG	0	0	0	0	0	0	0	0	0	0	0	0	0	0	0.17
chr1	C	4571647	CG	0	0	0	0	0	0	0	0	0.07	0	0	0	0	0.17	0
chr1	C	4571655	CG	0	0	0	0.06	0	0	0	0	0	0	0	0	0	0	0
chr1	C	4571827	CG	0.02	0.06	0.1	0.05	0.05	0.05	0.04	0.01	0.07	0.06	0.08	0.01	0.04	0.05	0.07
chr1	C	4571832	CG	0.01	0.02	0	0.02	0	0.01	0.01	0	0	0.01	0	0.01	0	0	0.04
chr1	C	4571834	CG	0.01	0	0	0.01	0	0.01	0.01	0.02	0	0.01	0.02	0	0.01	0.01	0.01
chr1	G	4571835	CG	0.03	0.01	0	0	0.01	0.01	0	0	0.01	0	0.05	0	0	0	0
chr1	C	4571840	CG	0	0.01	0	0	0.01	0	0	0	0.01	0.01	0.01	0	0.01	0.01	0
chr1	G	4571841	CG	0.01	0	0	0	0	0	0	0.01	0.01	0.01	0.01	0	0	0.02	0
chr1	C	4571843	CG	0	0.01	0	0.01	0	0	0	0	0.01	0	0.03	0	0.01	0.01	0
chr1	G	4571844	CG	0	0	0	0.01	0	0.02	0	0	0.01	0.02	0	0	0	0	0
chr1	C	4571858	CG	0	0	0.01	0	0.01	0.01	0	0	0	0.01	0	0.01	0	0	0
chr1	G	4571859	CG	0	0	0	0	0	0.01	0	0.01	0	0	0.07	0	0	0	0.02
chr1	C	4571883	CG	0.03	0.03	0.06	0.05	0.07	0.07	0.09	0.04	0.1	0.05	0.1	0.04	0.13	0.12	0.08
chr1	G	4571884	CG	0.06	0.02	0.07	0.03	0.11	0.07	0.03	0.08	0.1	0.03	0.08	0	0.01	0.07	0.05
chr1	C	4571890	CG	0.03	0.01	0.01	0.02	0.02	0.02	0.02	0.02	0	0	0.06	0	0.13	0.02	0.01
chr1	C	4571892	CG	0	0.02	0.01	0.01	0	0.01	0	0.01	0.01	0	0.01	0	0.05	0.01	0
chr1	C	4571894	CG	0.01	0.02	0.02	0.01	0	0.01	0	0.01	0	0	0	0.02	0.05	0.01	0.02
chr1	C	4571904	CG	0	0	0.01	0	0.01	0.01	0	0	0.01	0	0.04	0.04	0	0	0.01
chr1	G	4571905	CG	0	0.02	0	0.04	0.02	0	0.02	0.01	0	0	0.01	0	0.04	0	0
chr1	C	4571914	CG	0.01	0.03	0	0	0	0	0	0	0.03	0	0	0	0.13	0	0
chr1	G	4571915	CG	0	0	0.02	0.02	0.01	0	0.02	0.01	0	0	0	0.02	0.04	0.01	0.02
chr1	C	4571924	CG	0	0	0	0.03	0	0	0	0	0	0	0.03	0.04	0	0.02	0.01
chr1	G	4571925	CG	0	0	0.02	0	0.01	0	0	0.02	0	0	0.04	0.02	0.05	0.03	0.04
chr1	C	4571944	CG	0.04	0.06	0.08	0.04	0.07	0.07	0.07	0.05	0.03	0.15	0.11	0.08	0.04	0.01	0.02
chr1	G	4571945	CG	0	0.09	0.17	0.04	0.14	0.07	0.12	0.07	0.11	0.04	0.12	0.1	0.12	0.14	0.1
chr1	C	4571950	CG	0.02	0.01	0	0	0.01	0.02	0.01	0.01	0.03	0.02	0	0	0	0.01	0
chr1	C	4571952	CG	0	0.01	0	0.01	0	0	0	0	0.01	0	0.02	0	0	0	0
chr1	C	4571958	CG	0.01	0	0	0	0	0.02	0.05	0.04	0	0.01	0	0	0	0.04	0
chr1	C	4571970	CG	0	0.01	0.01	0.01	0	0	0.01	0	0	0	0.06	0.02	0.07	0	0.01
chr1	G	4572001	CG	0.02	0.04	0	0.01	0.01	0.01	0	0	0.01	0	0.01	0.04	0.01	0	0.03
chr1	G	4572017	CG	0	0.01	0	0	0	0.01	0	0	0	0	0.03	0.01	0	0.01	0.01
chr1	G	4572024	CG	0.04	0.01	0.01	0.01	0.01	0.02	0	0.01	0	0	0.03	0	0	0.01	0.01
chr1	G	4572032	CG	0.09	0.05	0.11	0.12	0.08	0.01	0.15	0.04	0.05	0.07	0.04	0.05	0.1	0.07	0.1
chr1	C	4688280	CG	1	0.91	0.93	0.98	0.96	0.95	1	0.94	0.97	1	1	1	1	0.9	0.93
chr1	C	4688310	CG	0.97	0.96	0.88	1	0.94	0.94	0.98	1	0.98	1	1	1	1	0.97	0.88
chr1	G	4688311	CG	0.93	1	0.95	0.98	0.93	1	1	0.96	1	0.99	1	1	0.79	0.98	1
chr1	C	4688319	CG	1	1	1	1	0.96	1	1	1	1	0.96	1	1	1	1	0.98
chr1	G	4688320	CG	0.9	0.98	0.95	1	0.97	1	0.95	0.97	0.98	0.99	1	1	0.97	1	1
chr1	G	4688331	CG	0.99	0.98	0.99	1	0.98	0.98	1	0.98	0.95	0.99	1	1	1	1	0.97
chr1	G	4688346	CG	1	1	0.97	0.98	0.94	1	0.98	1	0.98	1	1	0.98	0.86	0.89	0.98
chr1	G	4688349	CG	1	1	1	0.98	0.99	0.95	1	0.97	0.96	0.93	1	0.98	1	1	1
chr1	G	4688352	CG	0.95	0.88	1	0.98	0.97	0.89	0.97	0.98	1	0.91	0.99	0.9	1	0.94	0.97
chr1	G	4695381	CG	0.9	0.83	0.83	0.7	0.87	0.86	0.77	0.85	0.71	0.81	0.78	0.71	0.73	0.77	0.8
chr1	C	4763311	CG	0.97	0.98	0.98	0.98	0.97	0.96	0.99	0.98	0.95	0.89	0.98	0.98	0.98	0.97	0.96
chr1	C	4788586	CG	1	0.98	0.98	1	0.91	0.96	0.97	0.89	0.97	1	1	1	0.77	0.98	0.92
chr1	C	4788596	CG	0.88	0.9	0.89	1	0.93	0.98	0.97	0.95	0.99	0.99	1	1	1	0.87	0.92
chr1	C	4807863	CG	0.03	0.04	0.11	0.03	0.08	0	0.19	0.02	0.04	0.07	0.05	0.13	0.02	0.09	0.1
chr1	G	4807864	CG	0.04	0.03	0.02	0.01	0	0	0	0	0	0	0	0	0.03	0	0
chr1	C	4807871	CG	0.01	0.01	0.01	0	0.01	0.03	0	0.02	0	0	0	0	0	0.01	0
chr1	G	4807872	CG	0	0	0	0	0.01	0	0	0	0	0.01	0.01	0	0.05	0.01	0
chr1	C	4807883	CG	0.01	0.01	0.06	0	0	0.02	0	0	0	0	0	0	0	0.05	0
chr1	G	4807884	CG	0	0.02	0	0.04	0.02	0.03	0	0.02	0.04	0	0	0	0	0.03	0.02
chr1	C	4807889	CG	0	0	0	0.02	0.01	0	0	0	0	0.03	0.03	0	0.04	0	0.03
chr1	G	4807890	CG	0	0	0.01	0	0	0	0.02	0.02	0	0.01	0.01	0	0	0	0
chr1	C	4807892	CG	0	0	0.01	0	0	0.02	0	0	0	0.02	0	0	0	0	0
chr1	G	4807893	CG	0	0	0	0.01	0	0	0	0	0.01	0	0	0.02	0	0	0.01
chr1	C	4807901	CG	0.03	0.01	0.02	0	0.02	0	0	0	0.03	0	0.08	0	0	0	0
chr1	G	4807902	CG	0	0	0	0	0	0	0	0	0	0.01	0	0	0	0.02	0
chr1	C	4807908	CG	0.09	0.04	0.03	0.03	0.05	0.08	0	0.02	0.01	0	0.02	0.07	0.07	0.05	0.09
chr1	G	4807909	CG	0.06	0.01	0.01	0.04	0.05	0.03	0.06	0.02	0.07	0.07	0.05	0.07	0.04	0.05	0.05
chr1	C	4807919	CG	0.04	0.01	0	0	0.02	0	0	0.02	0	0	0	0.02	0	0	0
chr1	G	4807920	CG	0.02	0	0.01	0.03	0	0	0	0	0	0	0	0.09	0	0	0
chr1	C	4807934	CG	0	0	0	0	0	0	0	0	0.01	0.01	0.06	0	0	0.01	0
chr1	G	4807935	CG	0	0.01	0.01	0	0	0	0	0	0	0	0.01	0	0	0.01	0.02
chr1	C	4807939	CG	0	0	0.01	0	0	0	0	0	0	0	0	0	0	0.02	0
chr1	G	4807940	CG	0.01	0	0.02	0	0.02	0	0	0	0	0.01	0	0	0	0	0
chr1	C	4807946	CG	0	0.01	0.02	0.03	0.02	0.02	0	0.01	0.02	0.03	0.1	0.02	0	0.01	0.02
chr1	G	4807947	CG	0.01	0	0.01	0	0	0	0.03	0	0.01	0	0	0	0.03	0	0
chr1	C	4807949	CG	0.01	0	0	0	0.02	0.02	0	0	0	0	0	0	0	0.01	0
chr1	G	4807950	CG	0	0	0.02	0	0	0	0	0	0.01	0	0	0	0	0	0
chr1	C	4807957	CG	0.04	0.03	0.06	0.01	0.01	0.02	0	0.09	0	0.03	0	0	0	0.05	0.05
chr1	G	4807958	CG	0.09	0.04	0.05	0.01	0.07	0.03	0.11	0.05	0.02	0.02	0.02	0.14	0.03	0.07	0.04
chr1	C	4807998	CG	0.04	0.01	0.07	0.04	0.08	0.04	0.06	0.04	0.05	0.08	0.06	0	0.13	0.02	0.03
chr1	C	4808015	CG	0	0.01	0	0	0.02	0.01	0	0	0	0	0.01	0	0.01	0.03	0.02
chr1	C	4808027	CG	0.05	0.01	0	0.01	0	0	0	0.01	0	0	0.02	0	0	0.02	0
chr1	G	4808028	CG	0.01	0	0.01	0	0	0.01	0	0.01	0	0	0.03	0	0.01	0.01	0.01
chr1	C	4808030	CG	0.01	0.01	0	0	0.02	0	0	0	0.01	0.01	0.01	0.01	0	0	0.01
chr1	G	4808031	CG	0.01	0	0	0	0	0.01	0	0.01	0	0.11	0	0.02	0	0	0
chr1	C	4808032	CG	0	0.01	0	0	0	0.01	0.01	0.01	0	0	0.01	0.01	0.01	0	0
chr1	G	4808033	CG	0	0.01	0	0	0.01	0.01	0.02	0.02	0	0.01	0	0.01	0	0	0
chr1	C	4808034	CG	0	0	0	0	0.01	0.02	0	0	0.03	0.01	0.01	0.01	0.01	0	0
chr1	G	4808035	CG	0	0	0	0	0	0	0	0.02	0.01	0	0	0	0.02	0	0.02
chr1	C	4808042	CG	0	0	0	0.01	0.01	0.01	0.01	0	0	0	0	0	0.01	0.01	0.02
chr1	G	4808043	CG	0.01	0	0.01	0	0	0.01	0	0	0	0.01	0	0	0.01	0	0
chr1	C	4808046	CG	0.01	0	0.01	0	0	0	0	0	0.01	0	0	0	0	0	0
chr1	G	4808047	CG	0	0	0.01	0	0	0	0	0.01	0	0.01	0.01	0	0	0.03	0
chr1	G	4808049	CG	0.01	0	0	0.02	0.01	0.01	0	0.02	0	0	0	0	0	0.01	0
chr1	G	4808052	CG	0.01	0.01	0	0.01	0	0.01	0	0.01	0.01	0	0.03	0	0.02	0	0
chr1	G	4808057	CG	0.01	0	0	0	0	0	0	0	0	0	0.01	0	0.01	0	0
chr1	G	4808059	CG	0.01	0	0.02	0	0	0.01	0	0	0	0	0	0	0	0	0
chr1	G	4808068	CG	0.03	0.03	0.04	0.03	0.02	0.05	0.06	0.05	0.05	0.03	0.03	0.01	0.07	0.11	0
chr1	G	4808074	CG	0.02	0	0.01	0	0	0.1	0.02	0	0	0	0.08	0	0	0	0
chr1	G	4808078	CG	0	0	0	0	0.01	0	0	0	0.02	0	0	0.02	0	0.01	0.05
chr1	G	4808086	CG	0.01	0	0.01	0.03	0	0	0.02	0	0	0	0.02	0.03	0	0.01	0
chr1	C	4857516	CG	0.07	0.05	0.06	0.08	0.06	0.05	0.08	0.13	0.06	0.06	0.11	0.08	0.06	0.07	0.04
chr1	C	4857527	CG	0.02	0	0.01	0	0.01	0.02	0.01	0.01	0	0.01	0.01	0.01	0	0	0
chr1	C	4857537	CG	0	0.01	0	0	0	0	0	0	0.01	0	0.01	0.05	0	0	0
chr1	G	4857538	CG	0	0	0.01	0	0	0.01	0	0	0	0	0	0	0	0	0.01
chr1	C	4857550	CG	0.01	0.02	0	0	0	0	0	0.01	0.01	0.01	0.02	0	0	0	0
chr1	G	4857551	CG	0	0	0	0.01	0.01	0.01	0.01	0	0	0	0	0.01	0.02	0.01	0.02
chr1	G	4857574	CG	0	0.01	0.01	0	0	0.01	0.01	0	0	0	0	0	0	0	0
chr1	G	4857583	CG	0.03	0.02	0.08	0.06	0.07	0.02	0.04	0.01	0.04	0.05	0.06	0.08	0.02	0.06	0.04
chr1	C	4857907	CG	0.05	0.08	0.05	0.05	0.07	0.04	0.09	0.08	0.07	0.07	0.02	0.07	0.04	0.04	0.09
chr1	C	4857922	CG	0	0.01	0	0.01	0	0	0.01	0.01	0	0	0	0	0.01	0.01	0
chr1	C	4857932	CG	0.01	0	0	0.01	0.01	0.01	0.02	0.01	0.01	0	0	0.01	0.03	0	0.01
chr1	G	4857976	CG	0	0.01	0	0.01	0.01	0.02	0.01	0	0.01	0	0.02	0.01	0	0	0
chr1	G	4857983	CG	0	0.01	0.02	0.02	0.02	0.02	0.01	0	0.01	0	0.01	0	0	0	0.01
chr1	G	4857987	CG	0.05	0	0	0.05	0	0.02	0	0.01	0.01	0	0	0.01	0	0	0.01
chr1	G	4857993	CG	0.06	0.07	0.06	0.06	0.1	0.09	0.03	0.05	0.12	0.03	0.06	0.1	0.07	0	0.03
chr1	C	4858078	CG	0.06	0.16	0.02	0.05	0.07	0.1	0.08	0.04	0.05	0.05	0.16	0.14	0	0.08	0.04
chr1	C	4858092	CG	0	0.02	0	0	0.01	0.01	0.01	0	0.01	0.01	0.01	0.05	0	0.01	0
chr1	C	4858103	CG	0	0	0	0.01	0	0	0	0.01	0	0.06	0	0	0	0.03	0
chr1	C	4858107	CG	0	0.01	0.01	0.01	0.02	0.01	0.01	0.03	0.01	0	0	0	0.09	0	0.03
chr1	G	4858134	CG	0	0	0.01	0.01	0	0	0.06	0	0.01	0	0	0	0	0	0.02
chr1	G	4858137	CG	0	0.02	0	0	0.01	0	0	0.01	0	0.01	0	0	0	0	0
chr1	G	4858157	CG	0	0	0	0	0.01	0.02	0	0	0.01	0	0.02	0	0	0	0
chr1	G	4858164	CG	0.03	0	0	0	0	0	0.01	0	0.01	0.01	0	0	0	0	0.01
chr1	G	4858167	CG	0	0.01	0.01	0	0.04	0.02	0	0	0.02	0.01	0.08	0	0	0.01	0
chr1	G	4858170	CG	0.09	0.01	0.01	0	0.05	0.07	0.06	0.02	0.07	0	0	0.08	0.11	0.09	0.06
chr1	C	4912170	CG	1	0.92	0.89	0.92	0.97	1	1	1	0.92	0.88	1	0.96	1	0.96	0.87
chr1	G	4912280	CG	0.93	0.83	0.87	0.99	0.92	0.83	0.92	0.93	0.95	0.83	0.92	0.84	0.73	0.85	0.65
chr1	C	4947312	CG	0.73	0.8	0.73	0.8	0.82	0.79	0.92	0.86	0.85	0.87	0.68	0.73	0.73	0.78	0.82
chr1	C	4947334	CG	0.93	0.9	0.85	0.96	0.89	0.94	0.81	0.87	0.94	0.88	0.96	0.94	1	0.95	0.89
chr1	G	4947406	CG	0.6	0.88	0.86	0.89	0.9	0.88	1	1	0.83	0.93	0.78	1	0.71	0.71	0.71
chr1	C	4987914	CG	0.92	0.98	1	0.98	0.97	1	1	1	1	0.98	0.88	1	1	1	0.98
chr1	C	4987922	CG	0.9	0.96	0.95	0.98	1	0.98	0.95	0.96	1	0.94	0.88	1	1	1	0.98
chr1	C	4987945	CG	0.88	0.9	1	0.91	0.98	0.94	0.98	0.98	0.96	0.98	0.97	0.98	1	1	1
chr1	G	4987946	CG	0.96	0.99	0.98	0.98	1	0.97	0.9	0.97	0.96	1	0.98	0.96	0.96	0.97	0.98
chr1	G	4987969	CG	0.99	0.99	0.98	1	0.97	0.95	0.96	1	0.99	0.94	0.97	1	1	1	0.91
chr1	C	4987980	CG	0.97	0.99	0.94	0.99	0.97	0.97	0.94	0.99	0.99	0.98	1	1	1	0.99	0.94
chr1	G	4987981	CG	0.97	0.99	0.98	0.92	0.99	0.96	0.95	0.98	0.94	0.98	0.99	1	0.98	1	0.96
chr1	C	4987985	CG	1	1	0.97	0.96	0.97	0.97	0.98	0.98	0.97	0.99	0.96	0.95	1	0.96	1
chr1	C	4988007	CG	0.95	0.93	0.87	0.93	0.96	0.95	0.92	0.9	0.88	0.94	0.85	0.85	0.93	0.92	0.98
chr1	G	5018856	CG	0.03	0	0	0	0	0	0	0.03	0.01	0	0	0	0.08	0	0.01
chr1	G	5018880	CG	0	0	0	0	0	0	0	0.03	0.01	0.02	0	0	0	0	0
chr1	G	5018893	CG	0	0	0	0	0	0	0	0	0.02	0.02	0.09	0	0	0.09	0.01
chr1	G	5018898	CG	0.03	0.24	0.04	0	0.06	0.03	0.04	0	0	0	0.02	0.11	0.09	0.05	0.04
chr1	C	5019252	CG	0.05	0	0.13	0.15	0	0	0.14	0.11	0.05	0.09	0.17	0	0	0.11	0.06
chr1	G	5019535	CG	0	0.08	0.02	0	0.07	0	0	0	0.03	0	0.09	0.04	0.07	0.04	0
chr1	C	5019539	CG	0.06	0	0.06	0.09	0.09	0	0.05	0	0	0	0	0	0	0	0
chr1	G	5019540	CG	0.12	0.14	0.04	0.07	0.1	0.09	0.07	0	0.12	0.03	0	0.02	0	0.08	0.06
chr1	C	5019542	CG	0	0	0	0.02	0	0	0	0	0	0	0.06	0	0	0.07	0
chr1	C	5019546	CG	0	0	0	0	0.01	0	0	0	0	0	0	0	0	0	0
chr1	C	5019550	CG	0	0	0	0	0	0	0	0	0	0	0	0	0	0	0
chr1	C	5019581	CG	0	0	0	0.02	0.02	0	0	0	0	0	0	0	0	0.12	0
chr1	G	5019612	CG	0	0.03	0	0	0	0	0	0	0	0	0	0	0	0	0
chr1	G	5019643	CG	0	0	0.06	0.05	0.08	0.07	0	0.12	0.03	0.1	0.13	0.08	0	0	0.13
chr1	G	5019647	CG	0	0	0.06	0.02	0.04	0.07	0	0.02	0.03	0.1	0.13	0.08	0	0	0.09
chr1	G	5019651	CG	0	0	0	0	0.03	0	0	0	0	0	0.08	0.08	0.17	0	0
chr1	G	5019659	CG	0.14	0.08	0.03	0	0	0.23	0	0.1	0.22	0	0.15	0.09	0.17	0.04	0
chr1	C	5020037	CG	0.04	0.16	0.04	0.1	0.05	0	0.06	0.06	0.05	0.11	0	0.03	0	0.04	0.02
chr1	C	5020055	CG	0	0	0.01	0	0.02	0	0	0.05	0	0	0.01	0	0	0.07	0
chr1	C	5020072	CG	0	0.01	0.01	0	0	0	0.03	0.03	0.01	0.02	0.01	0.02	0	0.01	0.02
chr1	G	5020073	CG	0	0	0.01	0.02	0	0	0	0	0.01	0	0	0	0	0	0
chr1	G	5020116	CG	0.05	0	0.07	0.04	0.1	0.08	0.1	0.05	0.05	0	0	0.15	0.11	0.07	0.02
chr1	C	5020123	CG	0.06	0.02	0.02	0.04	0.08	0.07	0.02	0.05	0.06	0.05	0.09	0.09	0.06	0.08	0.07
chr1	C	5020141	CG	0.01	0.05	0.01	0	0	0	0	0	0	0.03	0	0	0.08	0	0.02
chr1	G	5020142	CG	0	0.02	0	0.01	0.01	0.01	0	0.01	0.01	0	0.01	0.01	0.02	0	0
chr1	C	5020162	CG	0	0	0.01	0.02	0.02	0.06	0	0.01	0	0	0	0	0	0	0
chr1	G	5020163	CG	0	0.01	0	0.01	0.01	0.01	0.02	0.01	0.03	0	0.02	0	0.01	0.01	0
chr1	C	5020171	CG	0.05	0.02	0	0.03	0.07	0.04	0.1	0	0.02	0.06	0	0.03	0.21	0.05	0
chr1	G	5020172	CG	0.01	0.03	0.02	0.03	0.02	0.01	0.01	0.01	0	0.01	0.02	0	0.01	0.01	0
chr1	C	5020189	CG	0	0	0	0	0	0	0.67	0	0	0.05	0.2	0.3	0	0	0
chr1	G	5020190	CG	0.12	0.1	0.14	0.1	0.11	0.06	0.04	0.07	0.11	0.1	0.04	0.09	0.06	0.07	0.03
chr1	C	5020209	CG	0	0	0	0	0.17	0	0	0.08	0	0.05	0.03	0	0	0.11	0
chr1	G	5020210	CG	0.05	0	0	0	0.08	0	0.14	0	0	0	0.24	0	0	0	0
chr1	C	5020232	CG	0	0	0	0.25	0.15	0	0	0	0	0.17	0.08	0	0.14	0	0
chr1	G	5020233	CG	0.06	0.07	0.13	0	0	0	0	0	0	0	0.24	0	0	0.35	0
chr1	G	5020237	CG	0.16	0.13	0	0.08	0	0.17	0	0.06	0.8	0	0.36	0.5	0	0	0.06
chr1	C	5020575	CG	0.07	0.07	0.05	0.12	0.09	0.02	0.03	0.02	0.06	0.11	0.07	0.03	0.05	0.11	0.06
chr1	C	5020612	CG	0.01	0.02	0.01	0.08	0.02	0.04	0.02	0.03	0.07	0.04	0	0	0.05	0.02	0.04
chr1	G	5020613	CG	0.04	0.07	0.02	0.05	0.05	0.03	0.04	0.06	0.02	0.05	0.04	0.06	0.05	0.01	0.03
chr1	G	5020646	CG	0.09	0.06	0.06	0.07	0.08	0.06	0.02	0.07	0.09	0.09	0.03	0.05	0.07	0.06	0.14
chr1	C	5022851	CG	0	0	0	0.05	0.02	0.13	0.03	0.08	0	0	0	0	0.03	0	0.06
chr1	C	5022863	CG	0.11	0	0	0	0.01	0	0.13	0	0	0	0.03	0	0	0	0
chr1	G	5022927	CG	0	0	0.06	0	0	0	0	0	0	0	0	0	0	0	0
chr1	G	5022930	CG	0	0	0	0	0	0	0	0	0	0	0	0	0	0	0
chr1	G	5022936	CG	0	0	0	0.12	0	0	0	0	0	0	0	0	0	0	0
chr1	G	5022942	CG	0	0	0	0	0	0	0	0	0.09	0	0	0	0	0	0
chr1	G	5022946	CG	0	0	0.19	0	0	0.05	0	0	0	0	0	0	0	0	0
chr1	C	5046728	CG	0	0	0	0.09	0	0	0	0	0	0.05	0	0.03	0.2	0	0.11
chr1	C	5072711	CG	1	1	1	1	1	0.93	1	0.67	1	1	1	1	1	1	0.9
chr1	C	5072736	CG	0	0.33	0	0	0.06	0.07	0	0	0	0	0.13	0.06	0	0.2	0.1
chr1	C	5083139	CG	0.07	0.07	0.03	0.03	0.05	0.06	0.04	0.04	0.05	0.03	0	0.12	0.07	0.05	0
chr1	C	5083160	CG	0	0	0	0	0	0.01	0	0	0	0	0	0.01	0	0.02	0
chr1	C	5083165	CG	0	0	0	0	0	0	0.03	0.01	0.01	0	0	0	0	0	0
chr1	C	5083174	CG	0	0	0	0	0	0	0	0.03	0.03	0.01	0.07	0	0.05	0	0
chr1	C	5083180	CG	0	0	0	0	0	0	0	0.01	0.02	0.01	0	0	0	0.03	0
chr1	C	5083186	CG	0	0	0	0.03	0	0.01	0.01	0	0.01	0.01	0	0.04	0.02	0	0
chr1	G	5083187	CG	0	0	0	0	0	0	0.04	0	0.02	0	0	0	0	0	0
chr1	G	5083206	CG	0	0	0	0	0.02	0	0	0.02	0.01	0	0.05	0	0	0	0.01
chr1	G	5083223	CG	0	0	0	0	0	0.01	0.01	0	0	0	0	0	0	0.01	0.01
chr1	G	5083230	CG	0	0	0.01	0.01	0	0.01	0.01	0	0.01	0	0.01	0	0	0.05	0.02
chr1	C	5083233	CG	0.11	0.1	0.05	0.1	0.04	0.06	0	0.06	0.03	0	0	0	0	0	0
chr1	G	5083234	CG	0.02	0.11	0.06	0.01	0.08	0.06	0.07	0.06	0.01	0.05	0.05	0.08	0.07	0.04	0.05
chr1	C	5083236	CG	0	0	0	0.03	0.01	0	0	0	0	0	0	0	0	0	0
chr1	C	5083244	CG	0.03	0	0	0.02	0.01	0	0	0.02	0	0	0	0	0	0	0
chr1	C	5083248	CG	0	0.02	0	0	0.01	0	0	0	0	0.04	0	0	0	0	0
chr1	C	5083252	CG	0	0.01	0	0	0	0	0	0.02	0	0.04	0	0	0.07	0	0
chr1	C	5083266	CG	0.05	0	0	0	0.01	0	0	0	0	0	0	0	0	0	0
chr1	G	5083267	CG	0	0.02	0.01	0.02	0	0.02	0.01	0	0	0	0	0	0	0	0
chr1	G	5083287	CG	0	0.01	0	0	0	0	0.03	0	0	0	0	0	0	0	0.02
chr1	G	5083304	CG	0.16	0.08	0.04	0.09	0.1	0.06	0.04	0.05	0.07	0.07	0.02	0	0.11	0.12	0.03
chr1	C	5083333	CG	0.08	0.05	0	0	0	0.08	0.19	0.07	0.04	0	0	0	0	0	0
chr1	C	5083337	CG	0	0	0	0	0	0	0	0	0.07	0	0	0	0	0	0
chr1	C	5083339	CG	0	0	0	0.07	0	0.08	0	0	0	0	0	0	0	0	0
chr1	C	5083351	CG	0	0	0	0	0.07	0	0	0.21	0.04	0	0	0	0	0	0
chr1	C	5083357	CG	0.25	0	0	0	0.02	0	0	0	0	0	0	0	0	0	0
chr1	G	5083377	CG	0	0	0.04	0	0	0	0	0.23	0	0	0	0	0	0	0
chr1	G	5083394	CG	0	0	0	0	0	0	0	0	0	0	0	0	0	0	0
chr1	G	5083396	CG	0	0	0	0	0	0	0	0.25	0	0	0	0	0	0	0
chr1	G	5083417	CG	0.13	0	0.14	0	0.18	0.11	0	0.1	0	0	0	0	0	0.25	0
chr1	C	5170626	CG	0.52	0.29	0.46	0.38	0.34	0.5	0.34	0.19	0.4	0.52	0.5	0.42	0.37	0.43	0.37
chr1	G	5170627	CG	0.33	0.28	0.35	0.29	0.37	0.35	0.3	0.25	0.39	0.36	0.39	0.31	0.53	0.46	0.27
chr1	C	5170637	CG	0.4	0.29	0.4	0.26	0.32	0.4	0.25	0.25	0.38	0.28	0.35	0.42	0.25	0.36	0.26
chr1	G	5170638	CG	0.22	0.17	0.28	0.21	0.28	0.26	0.2	0.2	0.27	0.24	0.25	0.26	0.32	0.35	0.16
chr1	G	5170746	CG	0.03	0.02	0.02	0.04	0.1	0.08	0.02	0.06	0.08	0.01	0.05	0.01	0.2	0.12	0.08
chr1	G	5170748	CG	0.05	0.09	0.06	0.05	0.11	0.09	0.1	0.1	0.07	0.01	0.06	0	0.24	0.11	0.07
chr1	G	5170760	CG	0.11	0.1	0.06	0.1	0.12	0.09	0.19	0.06	0.14	0.17	0.04	0.11	0.13	0.1	0.09
chr1	C	5175456	CG	0.99	0.93	0.92	0.97	0.94	0.91	0.93	0.97	0.98	0.98	1	0.95	0.87	0.97	1
chr1	G	5175569	CG	0.69	0.78	0.7	0.74	0.72	0.76	0.77	0.75	0.77	0.65	0.61	0.73	0.85	0.78	0.7
chr1	C	5184470	CG	0.9	0.75	0.89	0.82	0.87	0.89	0.64	0.59	0.84	0.89	1	1	0.77	0.92	1
chr1	C	5184496	CG	0.95	0.91	0.78	0.89	0.89	0.85	0.88	0.91	0.97	0.79	0.64	1	1	1	0.77
chr1	G	5184497	CG	0.92	0.97	0.83	0.92	0.96	0.81	0.85	0.63	0.99	0.85	0.91	0.91	0.93	0.89	0.82
chr1	G	5184524	CG	0.98	0.97	0.97	1	0.95	0.94	0.8	1	1	1	0.95	1	0.96	1	0.88
chr1	G	5184540	CG	0.92	0.99	0.87	0.98	0.95	0.78	0.89	1	0.95	0.96	0.89	0.9	0.93	0.99	1
chr1	G	5189375	CG	0.82	0.77	0.84	0.85	0.8	0.82	0.77	0.76	0.84	0.81	0.83	0.84	0.86	0.74	0.77
chr1	G	5189395	CG	0.89	0.86	0.84	0.84	0.89	0.88	0.85	0.88	0.85	0.82	0.87	0.88	0.91	0.82	0.85
chr1	G	5189400	CG	0.81	0.82	0.84	0.75	0.77	0.85	0.84	0.82	0.81	0.83	0.82	0.82	0.75	0.86	0.78
chr1	G	5189410	CG	0.95	0.88	0.89	0.88	0.88	0.9	0.86	0.93	0.91	0.89	0.87	0.92	0.89	0.93	0.88
chr1	G	5189457	CG	0.86	0.78	0.87	0.83	0.83	0.85	0.79	0.74	0.9	0.83	0.94	0.89	0.87	0.87	0.78
chr1	G	5189478	CG	0.65	0.68	0.72	0.71	0.69	0.76	0.75	0.78	0.71	0.67	0.88	0.75	0.78	0.9	0.83
chr1	G	5189482	CG	0.88	0.84	0.83	0.88	0.84	0.85	0.73	0.91	0.89	0.84	0.86	0.75	0.9	0.9	0.89
chr1	G	5189496	CG	0.9	0.88	0.89	0.95	0.91	0.91	0.89	0.93	0.93	0.9	0.96	0.88	0.95	0.94	0.93
chr1	C	5189554	CG	0.75	1	0.92	1	0.96	0.86	0.82	0.95	0.76	0.91	0.91	1	0.94	1	0.83
chr1	G	5272919	CG	0.75	0.74	0.79	0.79	0.89	0.86	0.8	0.71	0.74	0.82	0.79	0.89	0.9	0.8	0.74
chr1	G	5272926	CG	1	0.98	0.97	0.96	0.98	0.97	0.98	0.97	0.95	0.98	1	0.98	0.97	0.97	1
chr1	G	5272930	CG	0.98	1	0.99	1	0.99	1	1	1	0.97	0.99	0.98	0.98	0.93	1	1
chr1	G	5272933	CG	0.96	0.99	1	0.96	1	0.97	1	1	0.97	0.96	1	0.98	1	1	0.98
chr1	G	5272943	CG	0.86	0.9	0.93	0.92	0.92	0.98	0.95	0.97	0.98	0.97	1	0.96	0.94	0.94	0.96
chr1	G	5275300	CG	0.79	0.85	0.85	0.92	0.9	0.92	0.85	0.89	0.9	0.83	0.88	0.86	0.84	0.94	0.91
chr1	G	5275321	CG	0.9	0.96	0.96	0.92	0.97	0.98	0.92	0.95	0.89	0.86	0.88	0.85	0.89	0.95	0.99
chr1	C	5320478	CG	0.8	0.72	0.73	0.7	0.83	0.69	0.73	0.92	0.83	0.75	0.64	0.93	0.79	0.75	0.79
chr1	G	5320571	CG	0.69	0.76	0.73	0.85	0.78	0.84	0.83	0.73	0.86	0.81	0.78	0.81	0.66	0.78	0.76
chr1	C	5350787	CG	0.88	0.97	0.92	0.92	0.85	0.94	0.84	0.86	1	0.97	0.91	0.94	0.88	0.95	1
chr1	C	5350799	CG	0.83	0.87	0.88	0.97	0.94	0.81	0.95	0.79	0.93	1	0.86	0.95	1	0.89	1
chr1	C	5350820	CG	0.75	0.87	0.91	0.87	0.83	0.93	0.83	0.83	0.82	0.94	0.94	0.69	0.83	0.75	0.9
chr1	C	5350824	CG	0.96	0.94	0.92	0.97	1	1	1	1	0.97	0.91	0.97	0.94	1	1	1
chr1	G	5380706	CG	0.91	0.72	0.86	0.93	0.64	0.8	0.73	0.65	0.72	0.78	0.86	0.86	0.5	0.77	0.75
chr1	C	5423628	CG	0.9	0.81	0.82	0.88	0.85	0.81	0.83	0.87	0.89	0.81	0.84	0.93	0.89	0.89	0.83
chr1	C	5423665	CG	0.79	0.83	0.89	0.88	0.84	0.8	0.75	0.81	0.9	0.77	0.76	0.9	0.73	0.78	0.71
chr1	G	5430445	CG	0.8	0.91	0.88	0.92	0.94	1	1	1	1	1	1	1	0.9	0.91	0.9
chr1	G	5430449	CG	1	0.82	1	1	1	1	0.83	0.86	1	0.83	0.83	0.83	0.9	0.91	0.9
chr1	G	5430468	CG	1	1	1	1	0.88	0.88	1	0.86	1	1	1	1	0.95	1	0.9
chr1	C	5567129	CG	1	0.94	0.89	1	0.92	1	1	1	1	1	0.91	0.91	1	1	1
chr1	C	5567150	CG	1	1	1	1	0.92	1	0.92	0.88	1	1	0.94	0.92	1	1	1
chr1	G	5567187	CG	0	0	0	0.05	0	0	0	0	0.02	0.07	0.03	0	0	0	0
chr1	G	5567197	CG	0.54	0.85	0.58	0.74	0.79	0.53	0.77	0.58	0.53	0.66	0.64	0.47	0.5	0.63	0.5
chr1	G	5567212	CG	0.96	0.91	0.93	0.84	0.96	0.91	0.81	0.86	0.82	0.95	0.96	0.84	1	0.85	0.95
chr1	G	5567227	CG	0.78	1	0.96	0.83	0.82	0.81	0.96	0.93	0.92	0.88	0.88	0.85	1	1	0.82
chr1	G	5567232	CG	0.33	0.56	0.15	0.3	0.35	0.39	0.93	0.93	0.86	0.87	0.82	0.9	0.64	0.57	0.91
chr1	G	5567255	CG	0.86	0.94	0.83	1	0.63	0.81	0.86	0.67	0.86	0.75	0.7	0.86	0.93	0.62	0.6
chr1	C	5567259	CG	0.19	0.2	0.18	0	0.33	0.25	0.09	0.5	0.45	0.6	0.4	0.25	0.25	0.2	0.29
chr1	G	5567260	CG	0.75	0.89	0.83	1	0.59	0.85	0.56	0.13	0.66	0.63	0.68	0.82	0.75	0.6	0.67
chr1	G	5567270	CG	0.84	1	0.96	1	0.79	1	0.89	0.7	0.79	1	0.89	1	0.81	1	0.86
chr1	C	5567274	CG	0.94	0.85	0.81	0.9	0.85	0.74	0.85	0.92	0.95	0.96	0.89	0.82	0.86	0.92	0.85
chr1	G	5567275	CG	0.68	0.71	0.88	0.88	0.65	1	0.74	0.6	0.69	1	0.83	0.91	0.75	0.94	0.9
chr1	C	5567298	CG	1	1	0.89	0.98	1	1	1	0.92	0.98	0.86	0.93	1	1	1	1
chr1	C	5567300	CG	0.95	1	1	0.94	0.94	1	1	0.86	0.98	1	1	1	1	1	1
chr1	C	5567306	CG	0.95	0.86	0.59	0.96	0.9	0.96	0.79	1	0.98	0.75	0.86	0.82	0.6	0.94	0.82
chr1	C	5567312	CG	0.88	1	1	1	1	1	1	1	1	0.94	1	1	1	1	1
chr1	C	5584552	CG	0.83	0.93	0.99	0.95	0.95	0.95	0.94	0.98	0.85	0.93	0.97	1	0.83	0.94	1
chr1	G	5584658	CG	0.96	0.96	0.84	0.95	0.96	0.93	0.88	0.99	0.98	0.93	0.85	0.91	0.95	1	0.98
chr1	C	5589215	CG	0.47	0.42	0.38	0.38	0.44	0.22	0.38	0.32	0.49	0.27	0.39	0.21	0.48	0.49	0.37
chr1	C	5589237	CG	0.57	0.39	0.36	0.56	0.56	0.33	0.29	0.47	0.52	0.31	0.42	0.27	0.7	0.52	0.48
chr1	G	5589305	CG	0.83	0.82	0.76	0.71	0.73	0.76	0.8	0.72	0.77	0.77	0.68	0.69	0.82	0.77	0.76
chr1	G	5649429	CG	0.73	0.72	0.72	0.69	0.69	0.69	0.72	0.61	0.75	0.71	0.63	0.63	0.69	0.71	0.71
chr1	C	5678613	CG	0.85	0.9	0.96	0.96	0.91	0.94	0.99	0.91	0.9	0.96	0.92	0.94	0.85	0.9	0.91
chr1	C	5678649	CG	0.76	0.56	0.58	0.65	0.62	0.57	0.75	0.74	0.65	0.47	0.81	0.75	0.82	0.55	0.64
chr1	G	5678740	CG	0.58	0.78	0.73	0.63	0.77	0.65	0.47	0.76	0.68	0.65	0.73	0.4	0.46	0.86	0.74
chr1	C	5681190	CG	0.6	0.6	0.47	0.7	0.77	0.36	0.71	0.47	0.47	0.2	0.52	0.69	0.68	0.2	0.72
chr1	G	5747088	CG	0.69	1	1	1	0.55	1	0.8	0.95	1	0.93	0.92	1	1	1	1
chr1	G	5747106	CG	1	1	1	0.82	0.96	0.69	0.67	0.94	0.93	1	0.75	1	1	1	1
chr1	C	5747126	CG	0.06	0.07	0.09	0.32	0.4	0.38	0.18	0.47	0.2	0.17	0.29	0.36	0.51	0.6	0.5
chr1	C	5796525	CG	0.87	0.96	0.92	0.97	0.9	0.93	0.93	0.96	0.95	0.93	0.96	0.98	0.91	0.94	0.9
chr1	G	5796629	CG	0.91	0.85	0.9	0.91	0.94	0.82	0.88	0.89	0.94	0.9	0.71	0.9	1	0.81	0.83
chr1	G	5820119	CG	1	1	0.88	0.88	0.91	0.95	0.84	1	0.91	1	1	1	0.92	1	1
chr1	G	5820399	CG	1	0.94	0.86	0.92	0.9	1	1	1	0.92	1	1	0.95	1	0.95	0.95
chr1	C	5820402	CG	1	1	0.9	1	0.91	1	1	1	0.89	1	1	1	0.96	0.9	1
chr1	G	5820403	CG	1	0.94	0.9	1	0.89	0.96	1	1	0.88	1	0.96	0.95	1	1	0.87
chr1	G	5820408	CG	1	0.94	0.93	0.96	0.91	0.91	0.94	0.88	0.96	0.89	0.88	1	1	0.83	0.86
chr1	G	5820415	CG	0.73	0.9	0.89	0.96	0.83	0.87	0.81	0.85	0.92	0.94	0.92	0.94	1	0.87	0.91
chr1	G	5820422	CG	1	1	0.81	0.92	0.94	1	0.93	0.96	0.91	0.93	0.96	0.94	0.9	0.87	0.91
chr1	C	5820610	CG	0.86	1	0.91	1	0.93	0.96	1	1	1	1	1	1	1	0.92	1
chr1	C	5820622	CG	0.14	0.14	0	0	0	0	0.06	0.13	0	0	0.17	0.06	0.2	0	0
chr1	C	5829069	CG	0.83	0.8	0.82	0.94	0.88	0.98	1	0.92	0.9	1	0.84	1	0.95	0.95	0.93
chr1	G	5829133	CG	0.85	0.79	0.83	0.93	0.82	0.8	0.91	0.75	0.81	0.74	0.95	1	0.85	0.85	0.9
chr1	G	5849868	CG	0	0	0	0	0.04	0	0	0	0	0	0	0	0	0	0
chr1	C	5850294	CG	0.88	0.75	0.83	0.91	0.88	0.87	0.94	0.88	0.88	0.83	0.86	0.87	0.88	0.92	0.85
chr1	G	5850353	CG	0.69	1	0.91	0.87	0.95	1	1	0.95	1	0.94	1	1	1	1	1
chr1	C	5916135	CG	0.7	0.73	0.82	0.61	0.7	0.73	0.62	0.76	0.65	0.69	0.68	0.76	0.59	0.86	0.63
chr1	G	5916219	CG	0.87	0.67	0.76	0.66	0.69	0.88	0.68	0.76	0.69	0.67	0.56	0.92	0.75	0.67	0.38
chr1	C	5916244	CG	0.49	0.58	0.45	0.64	0.51	0.59	0.69	0.59	0.61	0.5	0.65	0.54	0.42	0.54	0.69
chr1	G	5916245	CG	0.58	0.56	0.79	0.68	0.62	0.72	0.59	0.53	0.73	0.75	0.58	0.77	0.67	0.6	0.56
chr1	C	5916280	CG	0.54	0.47	0.55	0.45	0.51	0.54	0.53	0.53	0.56	0.45	0.61	0.5	0.62	0.54	0.65
chr1	G	5916315	CG	0.47	0.65	0.49	0.62	0.49	0.52	0.66	0.59	0.53	0.21	0.7	0.23	0.44	0.44	0.48
chr1	G	5916333	CG	0.58	0.74	0.7	0.73	0.56	0.67	0.78	0.76	0.64	0.49	0.73	0.56	0.62	0.63	0.65
chr1	C	5917442	CG	0.06	0.2	0	0	0	0	0	0.2	0	0	0.13	0	0	0	0
chr1	C	5917449	CG	0	0	0	0.2	0	0	0	0	0	0	0	0	0	0	0
chr1	C	5962037	CG	0.94	0.81	0.81	0.71	0.93	0.95	0.94	0.79	0.67	0.93	0.89	0.93	0.68	0.86	0.82
chr1	G	5982243	CG	0	0	0	0	0	0	0	0	0	0	0	0	0	0	0
chr1	C	5982406	CG	0.9	0.95	0.94	0.94	0.83	0.96	0.75	0.93	0.92	0.88	0.92	0.93	0.85	0.91	0.9
chr1	C	5982415	CG	0.96	0.94	0.92	0.98	0.93	0.95	1	0.93	0.93	0.92	0.94	0.91	0.97	0.95	0.92
chr1	C	5982431	CG	0.93	0.93	0.94	0.96	0.92	0.84	0.92	0.93	0.92	0.98	0.96	0.78	0.88	0.9	0.98
chr1	G	5982432	CG	0.91	0.99	0.89	0.95	0.9	0.98	0.81	0.95	0.96	0.95	0.99	1	0.88	0.94	0.94
chr1	C	5982440	CG	0.94	0.98	0.95	0.96	0.98	0.93	1	0.98	0.96	0.84	0.96	0.95	1	0.91	0.97
chr1	G	5982441	CG	0.96	0.99	0.95	0.97	0.96	0.93	1	0.92	0.97	0.95	0.98	1	1	0.92	0.98
chr1	C	5982468	CG	0.99	0.96	0.97	0.97	0.95	0.94	0.98	0.95	0.96	1	0.97	0.91	1	0.99	0.98
chr1	G	5982469	CG	0.95	0.97	0.89	0.97	0.94	0.98	0.94	0.98	0.94	1	0.94	1	0.96	1	0.94
chr1	C	5982481	CG	0.99	0.98	0.99	0.95	0.98	0.94	0.96	0.93	0.96	0.95	0.96	0.97	1	0.94	0.99
chr1	G	5982532	CG	0.93	0.9	0.94	0.92	0.96	0.89	0.87	0.88	0.9	0.85	0.91	0.91	0.83	0.84	0.78
chr1	C	5982552	CG	0.8	0.72	0.75	0.78	0.77	0.77	0.79	0.81	0.82	0.75	0.8	0.78	0.59	0.83	0.82
chr1	G	5982553	CG	0.87	0.75	0.69	0.66	0.83	0.82	0.74	0.68	0.82	0.8	0.83	0.78	0.65	0.7	0.68
chr1	C	5982571	CG	0.81	0.82	0.79	0.81	0.79	0.79	0.8	0.83	0.81	0.73	0.75	0.81	0.71	0.76	0.77
chr1	C	5993141	CG	0.9	0.89	0.92	0.95	0.93	0.96	0.94	1	1	0.94	0.98	0.94	1	0.9	0.91
chr1	C	5993189	CG	0.67	0.76	0.71	0.75	0.68	0.72	0.82	0.73	0.88	0.79	0.82	0.78	0.85	0.8	0.64
chr1	G	6026853	CG	0	0	0	0	0	0	0	0	0	0	0	0.04	0	0	0
chr1	G	6026899	CG	0.92	0.96	0.95	0.92	0.89	0.92	0.92	0.9	0.86	0.85	0.89	0.95	0.84	0.97	0.84
chr1	C	6151069	CG	1	1	0.97	0.94	0.97	0.96	0.97	0.98	0.94	1	1	0.79	1	0.86	1
chr1	C	6151072	CG	0.87	0.86	0.84	0.9	0.93	0.88	0.87	0.91	0.93	0.89	0.88	0.94	0.82	0.94	0.95
chr1	C	6163576	CG	0.94	0.91	0.98	0.99	0.98	1	0.97	0.99	0.97	0.98	0.92	0.95	1	1	0.96
chr1	C	6163613	CG	0.93	0.88	0.89	0.9	0.91	0.91	0.93	0.86	0.88	0.95	0.82	0.9	0.85	0.87	0.91
chr1	G	6163673	CG	0.95	0.92	0.93	0.89	0.95	0.92	0.92	0.97	0.92	0.88	0.92	0.86	0.94	0.91	0.95
chr1	C	6164332	CG	0	0	0	0.33	0	0	0	0	0	0	0	0	0.08	0.14	0
chr1	C	6213415	CG	0.14	0.27	0.14	0.04	0.21	0.2	0.26	0.19	0.12	0.3	0.3	0.2	0	0	0.15
chr1	G	6213520	CG	0.2	0.13	0.17	0.13	0.18	0.3	0.09	0.13	0.13	0.15	0.08	0.12	0.47	0.25	0.07
chr1	C	6214311	CG	0.04	0.03	0.04	0.02	0.06	0.03	0.02	0.03	0.06	0.03	0.04	0.07	0.06	0.06	0.01
chr1	C	6214316	CG	0	0	0.01	0	0.01	0	0	0	0	0	0	0.01	0.01	0	0
chr1	C	6214336	CG	0	0.02	0	0	0	0.01	0	0	0	0	0.01	0	0.03	0	0
chr1	C	6214346	CG	0	0	0	0.02	0	0	0	0.02	0	0.01	0.01	0	0	0.01	0.01
chr1	G	6214390	CG	0	0.01	0	0.05	0.01	0.01	0.01	0.01	0.03	0	0.01	0	0	0	0.01
chr1	G	6214400	CG	0.1	0.06	0.02	0.05	0.06	0.08	0.03	0.02	0.09	0.1	0.06	0.05	0.01	0.08	0.06
chr1	C	6214639	CG	0.03	0	0.12	0.07	0	0.06	0.12	0.09	0	0.19	0.2	0	0	0	0
chr1	C	6214642	CG	0	0.03	0	0	0.01	0	0.02	0	0.01	0.01	0	0	0	0.11	0
chr1	C	6214651	CG	0	0	0	0	0.03	0	0	0	0.05	0	0	0	0	0	0
chr1	C	6214654	CG	0	0.03	0.06	0.02	0.01	0.03	0	0	0	0	0	0	0	0	0
chr1	C	6214663	CG	0	0	0	0.04	0.02	0.03	0.02	0.02	0	0.01	0	0.08	0	0	0
chr1	C	6214668	CG	0	0	0	0	0	0	0	0	0.01	0	0	0	0	0	0
chr1	C	6214686	CG	0	0	0	0.02	0	0	0.02	0	0	0	0	0.08	0.15	0	0
chr1	G	6214687	CG	0	0.03	0	0	0	0.04	0	0	0.03	0.03	0.03	0	0	0	0
chr1	G	6214690	CG	0	0	0.02	0	0	0	0	0	0	0.03	0	0	0	0	0
chr1	G	6214694	CG	0.05	0.02	0	0	0	0	0	0	0	0	0	0.1	0	0	0
chr1	G	6214696	CG	0	0	0	0	0.01	0	0	0.01	0	0	0	0	0	0	0
chr1	G	6214726	CG	0	0.04	0	0	0	0	0.02	0.01	0	0	0	0	0	0.04	0.04
chr1	C	6214729	CG	0.17	0.11	0.19	0.2	0.17	0	0	0.13	0	0	0	0	0.06	0	0
chr1	G	6214730	CG	0.02	0.05	0.01	0.02	0.08	0	0.16	0	0.04	0.15	0	0.09	0.18	0	0.01
chr1	C	6214732	CG	0	0	0	0	0.02	0	0	0	0	0.05	0	0	0	0	0.06
chr1	G	6214733	CG	0	0.1	0.02	0.04	0.04	0	0	0	0	0	0	0	0	0	0
chr1	C	6214738	CG	0	0	0	0	0	0	0	0.07	0	0.09	0	0	0	0	0
chr1	G	6214739	CG	0	0.04	0	0	0.01	0	0	0.03	0	0	0	0	0	0	0
chr1	C	6214746	CG	0	0.04	0	0	0	0	0	0	0	0.05	0	0	0	0	0
chr1	G	6214747	CG	0	0	0.02	0	0.01	0	0	0	0	0	0.04	0.09	0	0	0
chr1	C	6214748	CG	0	0.04	0	0.06	0	0	0	0	0	0.05	0	0	0	0	0
chr1	G	6214749	CG	0	0.04	0.02	0.03	0.01	0	0	0.03	0	0	0	0	0	0.06	0
chr1	C	6214750	CG	0	0	0	0	0.05	0	0	0	0	0.05	0	0	0	0.06	0
chr1	G	6214751	CG	0	0.02	0	0	0.03	0.04	0	0	0	0	0	0	0	0	0
chr1	C	6214756	CG	0	0	0	0	0	0	0	0	0	0.05	0	0	0	0	0
chr1	G	6214757	CG	0.04	0	0	0	0	0	0	0	0	0	0	0	0	0.02	0.04
chr1	C	6214764	CG	0	0	0	0	0	0	0	0.08	0	0	0	0	0	0	0
chr1	G	6214765	CG	0.13	0	0.04	0.04	0.19	0	0.12	0.03	0.02	0.13	0.08	0.07	0	0.02	0.04
chr1	G	6214773	CG	0	0	0	0	0	0	0.2	0	0.09	0	0	0	0	0	0
chr1	C	6214807	CG	0	0.02	0.05	0.06	0.05	0	0	0.04	0	0.27	0	0.09	0	0.09	0.04
chr1	C	6214815	CG	0	0	0	0	0	0	0	0.13	0	0.06	0	0	0	0	0
chr1	C	6214818	CG	0	0	0	0	0	0	0	0.04	0.02	0	0	0	0	0	0
chr1	C	6214826	CG	0.02	0	0	0	0	0	0	0.01	0	0	0	0	0	0.03	0
chr1	C	6214829	CG	0.02	0	0.03	0	0	0	0	0	0	0.06	0	0	0	0	0.09
chr1	C	6214832	CG	0	0	0	0.02	0	0	0	0	0	0	0	0	0	0	0
chr1	C	6214841	CG	0	0	0	0	0	0	0	0	0	0	0	0	0	0	0
chr1	C	6214848	CG	0.02	0	0	0	0	0	0	0	0	0	0	0	0	0	0
chr1	C	6214851	CG	0.11	0	0	0	0	0	0	0.03	0.02	0	0	0	0	0	0
chr1	C	6214854	CG	0.02	0	0	0	0	0	0	0	0	0	0	0	0	0.03	0
chr1	G	6214874	CG	0	0.04	0	0	0.02	0	0	0	0	0	0	0	0	0	0.13
chr1	G	6214877	CG	0	0.04	0	0	0.02	0	0	0	0	0	0	0	0	0	0
chr1	G	6214880	CG	0	0	0	0	0.02	0	0	0	0	0	0	0	0	0	0
chr1	G	6214891	CG	0.11	0	0	0.04	0	0	0	0	0	0	0	0	0	0	0
chr1	G	6214894	CG	0	0	0	0.04	0	0	0	0	0	0	0	0	0	0	0
chr1	G	6214909	CG	0	0	0	0	0	0	0	0	0	0	0	0	0	0	0
chr1	G	6214917	CG	0	0	0	0.13	0.02	0.11	0	0	0	0	0	0	0	0	0
chr1	G	6214920	CG	0	0	0.23	0	0.04	0	0	0.12	0.19	0.08	0	0.04	0.06	0	0.11
chr1	C	6214955	CG	0.09	0.02	0.11	0.09	0.04	0.04	0.1	0.07	0.02	0.11	0.01	0.04	0.07	0.02	0.03
chr1	G	6214956	CG	0.02	0.02	0.01	0.02	0.01	0.03	0	0.03	0.01	0.01	0.01	0	0	0	0.02
chr1	C	6214966	CG	0.01	0.01	0.02	0	0.02	0	0	0	0	0.02	0.01	0	0	0.01	0
chr1	G	6214967	CG	0.01	0	0.01	0	0.01	0.02	0	0.01	0.01	0	0	0	0.01	0.02	0.02
chr1	C	6214985	CG	0	0.01	0.01	0	0	0.01	0	0	0.01	0	0	0.01	0	0	0
chr1	G	6214986	CG	0.01	0.01	0	0	0.01	0	0.02	0.01	0	0.04	0.04	0	0	0.02	0.02
chr1	C	6214988	CG	0	0.01	0.01	0	0	0.01	0	0.01	0.01	0	0	0.01	0	0.01	0
chr1	G	6214989	CG	0.01	0	0	0	0.02	0.01	0	0.02	0.02	0	0	0	0	0	0.02
chr1	C	6214999	CG	0.04	0	0.03	0.02	0.02	0.04	0.03	0.01	0.01	0.02	0.04	0.01	0.05	0.01	0.03
chr1	G	6215000	CG	0.09	0.06	0.04	0.05	0.06	0.04	0.12	0.13	0.08	0.03	0.03	0.01	0.01	0.04	0.07
chr1	C	6215044	CG	0.06	0.06	0.11	0.04	0.06	0.03	0.01	0.09	0.06	0.07	0.08	0.01	0.11	0.04	0.13
chr1	C	6215049	CG	0	0	0	0	0.02	0	0.04	0	0.01	0	0	0	0	0.01	0
chr1	C	6215057	CG	0	0	0.01	0	0.01	0	0.01	0.01	0	0.01	0	0	0	0	0.01
chr1	C	6215060	CG	0	0	0	0.03	0.01	0.06	0	0.01	0.05	0	0	0	0.04	0	0
chr1	C	6215062	CG	0	0	0	0.03	0.02	0	0.01	0	0	0.08	0	0	0	0	0
chr1	C	6215073	CG	0	0.03	0	0.01	0	0	0	0	0.01	0	0.05	0.01	0	0	0.01
chr1	C	6215089	CG	0	0	0.01	0.03	0	0	0	0	0	0	0	0	0.01	0	0
chr1	G	6215090	CG	0.01	0.01	0.02	0.02	0	0	0.01	0.02	0	0	0.01	0	0	0.01	0
chr1	G	6215097	CG	0	0.01	0	0	0	0.02	0.02	0	0.03	0	0	0	0	0	0
chr1	G	6215109	CG	0	0	0	0	0	0	0.02	0	0	0	0.01	0	0	0	0
chr1	G	6215111	CG	0	0.01	0.01	0	0.01	0	0.01	0.02	0	0.01	0	0.14	0	0	0
chr1	G	6215117	CG	0	0	0	0.02	0.01	0	0.01	0	0	0.01	0.01	0.01	0	0.08	0
chr1	G	6215125	CG	0	0.05	0	0.01	0.01	0	0.08	0.02	0	0.03	0	0	0	0.01	0
chr1	C	6215127	CG	0.07	0.07	0.07	0.08	0.07	0.09	0.11	0.09	0.06	0.01	0.04	0.03	0.03	0.11	0.06
chr1	G	6215128	CG	0.04	0.19	0.03	0.15	0.1	0.11	0.08	0.04	0.06	0.13	0.13	0.03	0.06	0.03	0.05
chr1	C	6215138	CG	0	0.02	0	0	0	0	0	0.01	0.01	0	0.01	0.01	0.07	0	0
chr1	C	6215150	CG	0	0.01	0.02	0	0	0	0	0.02	0.01	0	0	0.01	0	0	0.01
chr1	C	6215152	CG	0.01	0	0.01	0.01	0.01	0.04	0.01	0.02	0	0.01	0.03	0.02	0	0	0.01
chr1	C	6215159	CG	0	0.04	0	0.01	0.01	0.04	0	0	0.01	0.01	0.01	0.01	0	0	0.02
chr1	G	6215160	CG	0.01	0.01	0.03	0	0	0.02	0.02	0.01	0.01	0	0	0	0	0.01	0
chr1	C	6215172	CG	0	0	0	0	0.02	0	0	0.03	0.01	0	0.03	0.01	0	0	0.01
chr1	G	6215173	CG	0.01	0.01	0	0	0	0	0	0	0	0	0.04	0	0.01	0	0.01
chr1	G	6215189	CG	0	0.01	0	0	0.01	0	0.01	0.01	0	0	0	0.02	0	0	0
chr1	G	6215195	CG	0	0	0.01	0.01	0.01	0	0	0	0	0	0	0	0.07	0	0
chr1	G	6215203	CG	0.05	0.07	0.08	0	0.08	0.02	0.04	0.02	0.02	0.12	0.11	0.07	0	0.01	0.07
chr1	G	6217248	CG	0.97	0.82	0.89	0.94	0.81	0.85	0.88	0.86	0.9	0.87	0.87	0.89	0.77	0.79	0.79
chr1	C	6339713	CG	0.98	0.9	0.98	0.98	0.93	0.91	0.98	0.99	0.93	1	0.95	1	0.95	0.95	0.94
chr1	G	6339714	CG	0.1	0.57	0.44	0.22	0.15	0.24	0.24	0.32	0.1	0.18	0.25	0.17	0.19	0.23	0.16
chr1	C	6339731	CG	0.95	0.83	0.79	0.93	0.87	0.9	0.91	0.85	0.93	0.95	0.91	0.98	0.95	0.97	0.81
chr1	G	6339732	CG	1	1	1	0.88	1	1	1	0.92	0.96	1	1	0.82	0.97	1	0.94
chr1	C	6339761	CG	0.9	0.92	0.91	0.97	0.9	0.97	0.94	0.92	0.97	0.88	0.94	0.98	0.94	0.97	0.99
chr1	G	6339762	CG	0.89	0.94	0.81	0.93	0.89	0.98	0.86	0.83	0.93	0.93	0.93	0.92	1	0.92	0.96
chr1	G	6339773	CG	0.78	1	0.82	0.95	0.81	0.91	0.96	0.93	0.85	0.83	0.88	1	1	0.58	0.91
chr1	G	6339797	CG	1	1	0.72	0.95	1	0.96	1	1	0.88	0.87	0.81	0.96	1	1	1
chr1	G	6346544	CG	1	0.9	0.67	0.85	0.82	0.88	0.63	1	0.92	0.9	0.92	0.89	1	1	1
chr1	G	6346563	CG	0.91	1	1	0.69	0.97	1	1	1	0.92	1	0.96	1	1	1	1
chr1	C	6359086	CG	0.15	0.07	0.17	0.15	0.14	0.08	0.1	0.06	0.09	0.1	0.31	0.04	0.2	0.08	0.07
chr1	C	6359091	CG	0.04	0.08	0.03	0.06	0.06	0.1	0.06	0.06	0	0	0.09	0.11	0.09	0.03	0
chr1	C	6359126	CG	0.01	0.02	0	0	0.03	0.03	0	0.01	0	0.06	0.05	0.01	0	0.02	0.03
chr1	G	6359127	CG	0.01	0	0.01	0	0.02	0.01	0	0.01	0	0.01	0.03	0.04	0	0.01	0
chr1	G	6359144	CG	0.09	0.04	0.06	0.08	0.06	0.04	0.13	0.06	0.09	0.05	0.04	0.06	0.01	0.02	0.04
chr1	C	6359161	CG	0.09	0.07	0.13	0.02	0.08	0.1	0.02	0.08	0.1	0.06	0.15	0.07	0.15	0.03	0.02
chr1	C	6359178	CG	0.03	0.03	0	0.03	0.02	0.01	0	0.03	0	0	0.02	0	0.04	0	0.02
chr1	C	6359189	CG	0	0.02	0.01	0.01	0	0	0	0	0	0.01	0.05	0.02	0	0	0
chr1	G	6359190	CG	0	0	0.01	0	0	0	0	0.01	0	0	0.03	0	0.02	0.02	0.04
chr1	G	6359219	CG	0	0.03	0.04	0.01	0.01	0.07	0.01	0.01	0.01	0.01	0.08	0	0.06	0.03	0.02
chr1	G	6359224	CG	0.01	0.01	0.06	0.02	0.03	0.04	0.04	0.05	0.02	0.01	0.09	0.02	0.02	0.03	0.01
chr1	G	6359230	CG	0.04	0.13	0.08	0.05	0.09	0.05	0.06	0.15	0.09	0.1	0.24	0.02	0.03	0.05	0.08
chr1	C	6441240	CG	0.1	0.04	0.04	0.11	0.05	0.08	0.15	0.05	0.05	0	0.1	0.03	0	0.06	0.01
chr1	C	6441246	CG	0.02	0.03	0.02	0.05	0.01	0.02	0.01	0	0.04	0.08	0.03	0	0.07	0.11	0
chr1	C	6441269	CG	0	0	0.04	0	0.01	0	0.01	0.03	0.02	0	0.02	0	0.07	0.06	0
chr1	C	6441272	CG	0	0.01	0.02	0	0.01	0.02	0.02	0	0	0	0.05	0	0.07	0.02	0.01
chr1	C	6441280	CG	0.01	0	0.03	0	0.01	0	0.02	0	0	0	0.02	0.1	0	0.05	0
chr1	G	6441281	CG	0.01	0.06	0	0.01	0.04	0.02	0.06	0.03	0.02	0.03	0.03	0.06	0.1	0.04	0.03
chr1	C	6441284	CG	0	0.02	0.02	0	0.03	0.02	0.02	0.05	0.05	0	0.06	0.05	0.17	0.05	0.07
chr1	G	6441285	CG	0.03	0.02	0.02	0.04	0.03	0.05	0.03	0.03	0.06	0	0.03	0	0.15	0.06	0.08
chr1	C	6441288	CG	0	0.06	0	0.03	0.03	0.02	0	0.01	0.03	0.06	0.08	0	0.1	0.01	0
chr1	G	6441289	CG	0	0.03	0.01	0.03	0.05	0.01	0.05	0.02	0.03	0.01	0.03	0.02	0.32	0.01	0
chr1	G	6441291	CG	0.01	0.02	0	0.03	0.01	0.01	0	0.01	0.01	0	0.05	0.02	0.35	0.05	0.07
chr1	G	6441298	CG	0	0.01	0.01	0.02	0.02	0.04	0.02	0.01	0	0.02	0.1	0.08	0.17	0.02	0.08
chr1	G	6441315	CG	0.01	0.01	0.01	0.02	0.03	0.02	0	0.01	0	0.01	0.04	0.03	0.19	0.04	0.01
chr1	G	6441317	CG	0	0.01	0	0.03	0.03	0.04	0.01	0	0.01	0	0.11	0.08	0.17	0	0.03
chr1	G	6441320	CG	0.04	0.04	0	0.07	0.02	0.05	0	0.06	0.04	0	0.07	0.03	0.19	0.02	0.01
chr1	C	6441324	CG	0.38	0.05	0.15	0	0.06	0	0	0.09	0	0	0	0	0	0.06	0.11
chr1	G	6441325	CG	0.05	0.05	0.07	0.04	0.06	0.03	0.07	0.02	0.01	0.05	0.09	0.03	0.14	0.04	0.02
chr1	C	6441328	CG	0	0.05	0.15	0	0.03	0	0	0.02	0.04	0	0	0	0.21	0.2	0.19
chr1	G	6441329	CG	0	0	0	0.33	0.06	0.13	0	0	0	0	0.4	0.06	0	0	0
chr1	C	6441339	CG	0	0.02	0.01	0.02	0.03	0.02	0	0.02	0	0	0.12	0	0	0.02	0.01
chr1	G	6441340	CG	0.05	0	0	0.33	0.02	0.14	0	0	0	0	0	0	0	0	0
chr1	C	6441342	CG	0	0	0	0	0.01	0.01	0	0.01	0	0	0.16	0.08	0	0	0
chr1	G	6441343	CG	0.05	0	0	0.43	0.05	0.14	0	0	0.07	0	0.44	0	0	0	0
chr1	C	6441345	CG	0	0.03	0.01	0.01	0.02	0	0	0.01	0	0	0.09	0	0	0	0.03
chr1	G	6441346	CG	0	0	0	0.36	0	0.13	0	0	0.04	0	0	0	0	0.06	0
chr1	C	6441348	CG	0.06	0.02	0.01	0.04	0.03	0.01	0.11	0	0	0	0.14	0.08	0.02	0	0.01
chr1	G	6441349	CG	0	0.04	0	0.43	0.04	0.25	0	0	0.27	0.07	0.4	0.14	0	0	0
chr1	C	6441356	CG	0	0.01	0.01	0	0	0	0	0.01	0	0	0.1	0.02	0.02	0	0
chr1	G	6441357	CG	0	0	0	0.36	0	0	0	0	0	0	0	0	0	0	0
chr1	C	6441358	CG	0	0	0.01	0.02	0	0	0	0.02	0	0	0.05	0	0	0	0
chr1	G	6441359	CG	0	0	0	0	0.02	0	0	0	0	0	0	0	0	0	0
chr1	C	6441365	CG	0	0	0	0.1	0	0	0	0.02	0	0	0.1	0.31	0	0	0
chr1	G	6441366	CG	0	0	0.07	0.36	0.02	0	0	0	0.11	0	0	0	0	0	0
chr1	C	6441369	CG	0.08	0.11	0.13	0.08	0.07	0.05	0.04	0.04	0.11	0.11	0.07	0.01	0.02	0.06	0.05
chr1	G	6441370	CG	0	0.14	0.14	0.43	0.13	0.21	0	0.21	0.04	0.07	0.4	0	0.33	0	0
chr1	C	6441373	CG	0	0.01	0.01	0	0.01	0.04	0	0.02	0.01	0.03	0.1	0.08	0.03	0	0
chr1	C	6441391	CG	0	0	0.01	0	0.02	0	0.09	0.03	0	0	0.07	0.02	0.03	0	0
chr1	C	6441395	CG	0	0	0	0	0	0.04	0	0	0	0	0	0.03	0.03	0	0
chr1	C	6441398	CG	0	0	0	0	0	0	0	0.01	0	0	0.01	0	0.03	0	0.01
chr1	G	6441423	CG	0	0	0.02	0	0	0	0.08	0	0.01	0	0.01	0	0.27	0	0
chr1	G	6441428	CG	0.01	0	0	0	0	0	0.01	0.01	0	0	0.01	0	0	0	0
chr1	G	6441434	CG	0	0.04	0	0	0.01	0	0.01	0	0	0	0.06	0	0.06	0.01	0.03
chr1	G	6441442	CG	0.03	0.03	0.01	0	0.01	0.02	0	0.02	0.01	0	0.05	0	0.06	0	0.03
chr1	G	6441445	CG	0	0	0	0.02	0	0.02	0	0	0.04	0	0	0	0	0.01	0.03
chr1	G	6441449	CG	0	0.03	0	0	0.01	0.03	0	0.02	0.01	0	0	0	0.06	0.04	0
chr1	G	6441454	CG	0.07	0.05	0.06	0.08	0.04	0.03	0.01	0.05	0.01	0.1	0.01	0.05	0	0.06	0
chr1	C	6517488	CG	1	0.96	0.86	0.98	0.95	0.98	1	0.99	0.98	1	0.94	0.98	1	1	1
chr1	C	6517536	CG	0.75	0.82	0.89	0.91	0.91	0.86	0.83	0.93	0.85	0.88	0.82	0.8	0.62	0.85	0.7
chr1	G	6517537	CG	0.75	0.82	0.72	0.82	0.81	0.72	0.66	0.91	0.79	0.79	0.73	0.77	0.69	0.85	0.71
chr1	C	6517571	CG	0.92	1	0.95	0.95	0.97	0.8	0.89	0.92	1	0.94	1	1	0.86	0.8	1
chr1	G	6517572	CG	0.8	1	0.93	1	0.93	0.94	0.96	0.98	0.88	0.84	0.74	1	0.94	0.98	1
chr1	C	6645101	CG	0.94	0.97	0.98	0.97	0.98	1	0.96	1	0.93	0.97	0.98	0.96	1	0.98	0.96
chr1	G	6645177	CG	0.81	0.88	0.87	0.65	0.84	0.84	0.79	0.82	0.89	0.74	0.66	0.89	0.77	0.84	0.86
chr1	C	6699880	CG	0.85	0.84	0.8	0.81	0.8	0.84	0.89	0.89	0.89	0.8	0.71	0.76	0.74	0.77	0.9
chr1	G	6699988	CG	0.93	0.98	0.97	0.99	0.97	0.95	0.99	0.99	0.99	0.99	0.97	0.88	0.91	0.98	1
chr1	G	6836193	CG	0.95	1	0.97	0.99	0.98	0.99	0.97	0.98	0.96	0.99	0.97	0.99	0.77	1	0.95
chr1	G	6836217	CG	1	1	0.98	0.94	0.97	0.95	0.97	0.99	0.99	0.95	0.99	0.96	1	1	0.97
chr1	G	6917177	CG	0	0	0.13	0	0	0	0	0	0	0	0	0	0	0	0
chr1	G	6917215	CG	0.86	0.9	0.78	1	1	1	0.86	0.8	0.92	1	0.8	0.85	0.94	0.88	1
chr1	G	6917222	CG	1	1	0.89	0.83	0.82	0.93	0.93	1	1	1	0.9	1	0.88	0.88	0.89
chr1	G	7057500	CG	0.86	0.88	0.75	0.88	0.91	0.84	0.86	0.86	0.87	0.93	0.89	0.9	0.84	0.88	0.83
chr1	G	7057508	CG	0.97	0.94	0.93	0.95	0.93	0.96	0.99	0.96	0.97	0.99	0.97	0.93	0.89	0.97	0.97
chr1	G	7057511	CG	0.93	0.91	0.95	0.95	0.94	0.94	0.96	0.92	0.96	0.89	0.97	0.94	0.93	0.96	0.96
chr1	C	7088594	CG	0.03	0.05	0.08	0.06	0.09	0.04	0.01	0.03	0.04	0.02	0	0.11	0.12	0.02	0.07
chr1	C	7088622	CG	0	0.04	0.01	0	0.01	0.01	0	0	0	0.01	0	0	0	0.03	0.01
chr1	C	7088635	CG	0	0	0.01	0	0.01	0	0	0	0	0.01	0	0	0	0.01	0
chr1	C	7088637	CG	0	0	0	0	0.01	0.03	0.01	0.01	0	0	0	0	0	0	0.04
chr1	G	7088664	CG	0.01	0.01	0.01	0.02	0	0	0.01	0.01	0	0	0.01	0	0	0	0.01
chr1	G	7088676	CG	0	0.01	0	0	0	0	0	0.01	0.01	0	0	0.05	0	0	0.01
chr1	G	7088684	CG	0	0	0.01	0	0	0	0	0.01	0	0.01	0.02	0	0	0	0
chr1	G	7088687	CG	0.01	0.01	0.01	0.01	0	0	0	0.01	0.01	0.02	0	0	0	0	0.01
chr1	G	7088691	CG	0.08	0.08	0.05	0.05	0.07	0.05	0.06	0.07	0.1	0.04	0.03	0.05	0.12	0.05	0.05
chr1	C	7089003	CG	0.12	0.1	0.11	0.03	0.07	0.08	0.08	0.11	0.18	0.05	0.06	0.09	0.02	0.06	0.07
chr1	C	7089010	CG	0	0	0	0.02	0.03	0	0	0	0	0	0.01	0	0	0.01	0
chr1	G	7089011	CG	0.02	0.01	0	0	0.01	0	0	0	0	0	0.01	0	0	0	0
chr1	C	7089015	CG	0	0.01	0	0.01	0	0.01	0.02	0	0.01	0	0.01	0	0.01	0.01	0.02
chr1	G	7089016	CG	0.03	0.01	0.01	0.01	0	0	0	0.04	0.01	0	0	0	0	0	0.01
chr1	C	7089022	CG	0	0.04	0	0.01	0	0	0.02	0.03	0	0	0	0	0	0	0.03
chr1	G	7089023	CG	0.01	0.02	0	0.01	0	0	0	0.01	0.02	0	0	0	0	0	0.01
chr1	C	7089030	CG	0	0.02	0	0	0	0.01	0.04	0.01	0	0	0	0	0	0	0
chr1	G	7089031	CG	0	0	0.03	0	0	0.01	0	0	0	0	0	0	0	0.01	0.02
chr1	C	7089032	CG	0	0.01	0.01	0	0	0	0	0.01	0	0.01	0	0	0	0.01	0.02
chr1	G	7089033	CG	0	0	0.01	0.01	0.01	0	0	0.01	0	0.01	0	0	0	0.03	0.02
chr1	C	7089035	CG	0	0	0.02	0	0	0	0	0.01	0	0	0	0	0	0	0
chr1	G	7089036	CG	0.01	0.02	0.02	0	0.02	0	0	0.01	0	0	0	0.13	0	0.01	0.02
chr1	C	7089038	CG	0	0.01	0.01	0.01	0	0	0	0	0.02	0	0.01	0.03	0	0.01	0.01
chr1	G	7089039	CG	0	0.02	0	0	0	0.01	0.01	0	0	0	0	0.02	0	0.01	0
chr1	C	7089044	CG	0.01	0.01	0	0	0.01	0.01	0	0	0	0	0	0	0	0	0
chr1	G	7089045	CG	0	0	0	0.02	0.02	0	0	0.04	0	0.02	0	0.04	0.02	0	0.03
chr1	C	7089048	CG	0	0.01	0	0	0	0	0	0.01	0	0	0	0	0	0.02	0
chr1	G	7089049	CG	0	0	0	0	0	0	0.01	0.03	0	0	0	0.02	0	0	0.01
chr1	C	7089056	CG	0.04	0.08	0	0.06	0.02	0.29	0.09	0.02	0.13	0.04	0.03	0.14	0	0.06	0
chr1	G	7089057	CG	0.03	0.06	0.04	0.08	0.04	0.05	0.06	0.06	0.01	0.02	0.04	0.01	0.07	0.09	0.01
chr1	C	7089065	CG	0.04	0.01	0	0	0.01	0	0	0	0	0	0.03	0	0	0.06	0.03
chr1	G	7089066	CG	0	0	0	0	0.02	0	0.02	0.02	0	0.09	0	0	0	0.05	0
chr1	C	7089077	CG	0	0	0	0	0.02	0	0	0	0	0	0	0	0.06	0	0.11
chr1	G	7089078	CG	0	0	0	0.02	0	0	0.08	0	0	0	0	0	0	0	0
chr1	C	7089080	CG	0.07	0	0	0	0.02	0	0.02	0	0.04	0	0	0	0	0	0
chr1	G	7089081	CG	0	0	0	0.02	0	0	0	0.02	0	0	0	0	0	0	0
chr1	C	7089085	CG	0	0	0	0	0.02	0	0	0	0	0	0	0	0	0	0
chr1	G	7089086	CG	0	0.02	0	0.02	0	0	0	0.02	0	0.02	0	0.04	0	0.03	0
chr1	C	7089089	CG	0.04	0	0.03	0	0.01	0	0	0	0	0	0	0	0	0	0
chr1	G	7089090	CG	0	0	0	0	0.01	0	0	0	0	0	0	0.07	0	0	0
chr1	C	7089092	CG	0	0	0	0	0.02	0	0	0	0.02	0	0	0	0	0	0
chr1	G	7089093	CG	0.03	0	0	0	0	0	0	0	0	0	0.03	0.04	0	0	0
chr1	C	7089095	CG	0	0.05	0	0	0.06	0.19	0.05	0	0.02	0	0	0.04	0.02	0.03	0
chr1	G	7089096	CG	0	0	0	0.08	0.04	0.09	0.05	0.11	0.12	0	0.08	0.11	0	0.03	0
chr1	C	7153642	CG	0.77	0.82	0.74	0.84	0.87	0.88	0.85	0.79	0.85	0.82	0.78	0.79	0.83	0.78	0.69
chr1	G	7153756	CG	0.85	0.96	0.89	0.95	0.96	0.98	0.93	0.96	0.96	0.93	0.92	0.95	0.95	0.97	0.93
chr1	C	7236986	CG	0.93	1	0.83	0.88	0.92	1	0.94	1	1	1	0.84	1	0.9	0.8	1
chr1	C	7237000	CG	0.67	0.88	0.88	1	0.8	1	0.89	0.88	0.88	0.88	0.75	0.75	0.65	0.6	0.7
chr1	G	7237026	CG	0.94	0.91	0.91	0.91	0.88	0.91	0.86	0.87	0.84	0.88	0.87	0.9	0.9	0.95	0.92
chr1	C	7237032	CG	0.2	0.33	0.2	0.88	0.4	0.71	0.24	0.06	0.46	0.32	0.47	0.36	0.42	0.4	0.43
chr1	G	7237033	CG	0.7	0.6	0.64	0.62	0.61	0.5	0.46	0.44	0.42	0.45	0.43	0.49	0.58	0.39	0.61
chr1	G	7237062	CG	0.93	0.94	0.95	0.97	0.93	0.92	0.95	0.92	0.93	0.91	0.93	0.94	0.95	0.92	0.92
chr1	C	7237072	CG	0.98	0.99	0.79	0.99	0.98	0.99	0.98	0.97	0.91	0.9	0.79	0.84	0.98	0.96	0.95
chr1	C	7237087	CG	0.95	0.95	0.92	0.97	0.94	1	0.98	0.96	0.99	0.99	0.97	1	0.98	0.99	0.98
chr1	C	7237107	CG	1	0.94	0.91	0.97	0.96	0.99	1	0.97	0.97	0.99	0.94	0.98	0.98	1	0.98
chr1	G	7237108	CG	0.95	0.99	0.89	0.96	0.95	0.99	0.98	0.98	0.96	0.99	0.94	0.98	0.99	0.92	0.97
chr1	C	7237121	CG	0.93	0.96	0.98	0.98	0.98	0.87	0.95	0.98	0.98	1	0.98	1	1	0.9	0.94
chr1	G	7237122	CG	0.99	0.96	0.94	1	0.94	0.98	0.97	0.9	0.93	0.94	0.94	1	0.99	0.89	0.96
chr1	G	7237142	CG	0.99	0.97	0.93	0.96	0.96	0.98	0.94	0.99	0.95	0.94	0.9	0.99	0.94	0.9	0.92
chr1	G	7237201	CG	1	1	0.97	1	0.92	0.97	1	0.96	0.96	0.97	0.92	1	1	1	0.95
chr1	C	7242380	CG	0.9	0.95	0.89	1	0.94	0.93	0.88	0.93	0.86	0.98	0.92	0.86	0.86	0.98	0.99
chr1	C	7242495	CG	1	0.97	0.98	0.96	0.98	0.97	0.98	1	0.99	0.97	0.97	1	0.95	0.96	0.98
chr1	C	7242526	CG	0.79	0.87	0.78	0.78	0.88	0.84	0.76	0.79	0.76	0.84	0.82	0.92	0.86	0.78	0.73
chr1	G	7242581	CG	0.88	0.95	0.94	0.93	0.96	0.89	0.95	0.87	0.91	0.95	0.91	0.98	0.96	0.94	0.95
chr1	C	7271998	CG	0.99	0.94	0.96	0.97	0.96	0.91	0.93	0.95	0.98	0.96	0.92	1	1	0.92	0.98
chr1	C	7272009	CG	0.93	0.92	0.95	0.91	0.95	0.92	0.86	0.95	0.93	0.95	0.95	0.9	0.95	0.88	0.95
chr1	C	7272013	CG	0.97	0.98	0.95	0.93	0.97	0.94	0.94	0.95	0.89	0.94	0.89	0.9	0.94	0.93	0.94
chr1	C	7272044	CG	0.87	0.91	0.89	0.89	0.9	0.89	0.88	0.95	0.9	0.89	0.9	0.76	0.93	0.86	0.84
chr1	G	7272045	CG	0.85	0.83	0.86	0.89	0.88	0.84	0.89	0.9	0.89	0.87	0.86	0.91	0.84	0.82	0.88
chr1	G	7272068	CG	0.99	0.98	0.95	0.98	0.98	0.97	0.98	0.97	0.96	0.97	0.95	0.99	0.97	0.98	0.99
chr1	G	7287879	CG	0.84	0.71	1	0.85	0.94	1	1	0.81	0.78	1	1	0.71	0.88	1	0.8
chr1	C	7287915	CG	0.94	0.94	0.92	0.97	0.93	0.98	0.95	0.99	0.96	1	0.99	1	0.91	0.92	1
chr1	C	7287919	CG	0.73	0.78	0.79	0.84	0.83	0.81	0.85	0.82	0.73	0.68	0.74	0.89	0.88	0.84	0.67
chr1	C	7287941	CG	0.65	0.67	0.65	0.63	0.55	0.67	0.73	0.67	0.71	0.71	0.74	0.64	0.46	0.62	0.6
chr1	C	7293656	CG	0.9	0.93	0.95	0.96	0.96	0.95	0.9	0.94	0.97	0.95	0.91	0.95	0.94	0.93	0.86
chr1	C	7293661	CG	0.9	0.91	0.88	0.91	0.9	0.94	0.82	0.81	0.85	0.81	0.81	0.89	0.88	0.94	0.8
chr1	C	7293702	CG	0.89	0.89	0.85	0.83	0.88	0.96	0.79	0.8	0.77	0.77	0.75	0.78	0.91	0.91	0.87
chr1	C	7302098	CG	0.76	0.91	0.97	0.86	0.97	0.88	0.9	1	0.97	0.93	0.92	0.93	1	0.9	0.97
chr1	C	7302132	CG	0.53	0.46	0.7	0.6	0.66	0.61	0.9	0.86	0.7	0.78	0.62	0.79	0.8	0.85	0.8
chr1	C	7306547	CG	1	0.94	0.95	0.84	0.9	0.95	0.93	0.85	1	0.89	0.88	0.9	0.91	0.81	0.72
chr1	C	7307142	CG	0.92	0.78	0.83	0.88	1	0.91	0.93	0.97	0.98	0.92	0.89	1	0.94	1	0.91
chr1	C	7307167	CG	0	0.18	0.03	0	0	0.1	0.19	0.03	0.12	0	0	0	0.24	0.06	0.06
chr1	C	7307172	CG	1	1	0.99	0.95	0.91	1	1	1	0.94	1	0.95	1	1	1	0.97
chr1	C	7307176	CG	1	0.91	0.88	0.93	0.92	0.97	0.72	1	0.96	1	1	1	1	1	0.96
chr1	C	7307207	CG	1	0.9	1	0.88	0.92	0.92	0.95	0.98	0.86	0.97	0.89	1	1	1	0.71
chr1	C	7307222	CG	0.94	0.53	0.87	0.84	0.74	0.78	0.83	0.71	0.87	0.92	1	0.94	0.76	0.88	0.82
chr1	G	7307299	CG	0.88	0.82	0.96	0.81	0.88	0.88	0.94	0.92	0.81	0.76	0.67	0.96	0.8	0.81	0.89
chr1	G	7307329	CG	0.97	1	1	0.86	0.99	0.96	0.94	1	1	1	1	1	1	1	1
chr1	C	7351868	CG	0.99	0.98	0.98	0.98	0.97	0.99	0.99	0.99	0.99	0.99	0.97	0.96	1	0.99	1
chr1	G	7397996	CG	0.5	0.64	0.86	0.56	0.63	0.44	0.46	0.57	0.5	0.22	0.31	0.27	0.89	0.67	0.56
chr1	G	7398008	CG	0.89	0.9	0.71	0.8	0.69	0.75	1	0.86	0.77	0.89	0.75	0.8	0.89	1	0.94
chr1	C	7398510	CG	0.05	0.08	0.09	0.08	0.07	0.14	0.12	0.05	0.09	0.07	0.16	0.14	0.13	0.03	0.19
chr1	G	7398511	CG	0	0.13	0.03	0	0.03	0	0	0	0	0.03	0	0.32	0.04	0	0.12
chr1	C	7398541	CG	0	0.01	0.01	0	0.01	0	0	0	0	0	0.02	0	0	0	0
chr1	G	7398542	CG	0.1	0.1	0.21	0.11	0.18	0.18	0.21	0.19	0.15	0.11	0.08	0.23	0.08	0.05	0.12
chr1	C	7398555	CG	0	0	0	0.03	0.02	0	0.17	0	0	0	0.03	0	0	0.03	0.03
chr1	G	7398556	CG	0.21	0.2	0.16	0.25	0.24	0.22	0.11	0.21	0.17	0.14	0.13	0.07	0.22	0.21	0.26
chr1	C	7488115	CG	0.94	0.94	0.95	0.97	0.92	0.94	0.92	0.93	0.94	0.92	0.93	0.94	0.93	0.94	0.95
chr1	C	7488122	CG	0.92	0.94	0.93	0.93	0.93	0.93	0.94	0.93	0.93	0.9	0.92	0.92	0.93	0.93	0.94
chr1	C	7488131	CG	0.9	0.94	0.89	0.88	0.91	0.78	0.83	0.89	0.87	0.89	0.85	0.8	0.86	0.89	0.86
chr1	C	7488160	CG	0.04	0.06	0.03	0.04	0.04	0.02	0.03	0.03	0.05	0.03	0.06	0.03	0.04	0.07	0.02
chr1	G	7488282	CG	0.85	0.88	0.88	0.62	0.94	0.82	0.64	0.85	0.92	0.95	0.91	0.33	1	1	1
chr1	G	7488293	CG	0.85	0.65	0.63	0.71	0.83	1	0.82	1	0.83	0.58	0.78	0.67	0.73	0.7	0.8
chr1	G	7488315	CG	0.8	0.45	0.4	0.56	0.7	0.77	0.59	0.78	0.55	0.68	0.47	0.5	0.54	0.59	0.45
chr1	G	7488322	CG	0.94	1	0.89	0.88	0.85	0.86	1	1	0.75	1	0.86	1	0.89	0.9	0.88
chr1	G	7488331	CG	0.82	0.75	0.89	0.75	0.92	0.86	0.6	1	1	0.83	0.86	0.5	0.94	0.9	1
chr1	C	7488359	CG	0.06	0.1	0	0	0.05	0	0	0	0	0.17	0.18	0.2	0.13	0.11	0
chr1	C	7548404	CG	0.22	0.22	0.22	0.15	0.19	0.17	0.19	0.13	0.19	0.2	0.15	0.17	0.18	0.16	0.24
chr1	G	7548540	CG	0.35	0.46	0.46	0.43	0.35	0.4	0.39	0.38	0.38	0.41	0.46	0.47	0.58	0.41	0.38
chr1	C	7563806	CG	0.94	0.98	0.92	0.93	0.97	0.96	0.91	0.98	0.95	0.94	0.92	0.96	0.98	0.98	0.96
chr1	C	7563825	CG	0.93	0.98	0.97	0.94	0.95	0.96	0.97	0.96	0.97	0.94	0.97	0.96	0.9	0.92	0.95
chr1	C	7608514	CG	1	1	0.95	0.88	0.99	0.96	1	1	0.98	1	1	0.94	0.92	1	1
chr1	C	7608518	CG	1	0.89	1	0.94	0.95	1	0.91	1	1	0.84	0.97	0.94	1	0.96	1
chr1	C	7608520	CG	0.9	0.88	1	0.94	1	0.92	1	0.98	1	1	0.89	0.72	0.92	0.92	1
chr1	C	7608526	CG	0.97	0.95	0.97	1	1	0.96	1	0.98	1	0.97	0.81	0.95	1	0.96	1
chr1	C	7608528	CG	1	1	0.97	1	1	1	1	0.96	0.85	1	0.95	0.95	1	0.96	1
chr1	C	7608545	CG	0.97	0.87	0.79	1	0.92	0.79	0.96	0.96	0.98	0.92	0.92	0.95	1	0.83	1
chr1	C	7608557	CG	0.93	0.97	0.95	1	0.97	0.77	0.91	1	0.93	0.97	1	0.82	1	0.96	0.95
chr1	G	7608635	CG	1	0.94	1	1	0.83	0.73	1	0.95	0.91	1	1	1	1	0.9	1
chr1	G	7608677	CG	1	0.92	0.93	1	0.9	0.92	1	1	1	1	0.94	1	1	1	1
chr1	C	7664092	CG	1	1	1	1	1	0.87	1	1	1	1	1	1	1	0.9	0.8
chr1	C	7664119	CG	1	1	1	1	1	1	1	1	1	1	1	1	1	1	0.83
chr1	C	7664128	CG	0	0	0	0	0	0	0	0	0	0	0	0	0.09	0	0
chr1	G	7684483	CG	0.54	0.71	0.66	0.9	0.82	0.69	0.32	0.68	0.64	0.74	0.74	0.75	0.63	0.63	0.95
chr1	C	7712787	CG	0.86	1	1	0.86	0.91	1	0.97	0.94	0.91	0.98	0.95	0.94	0.95	1	0.89
chr1	C	7712810	CG	1	0.82	0.69	0.57	0.87	0.91	0.83	0.75	0.83	0.84	0.67	0.84	0.9	0.92	0.88
chr1	C	7712822	CG	0.22	0.13	0.38	0.14	0.26	0.55	0.25	0.28	0.31	0.29	0.24	0.31	0.32	0.31	0.33
chr1	G	7712952	CG	0.37	0.3	0.35	0.39	0.28	0.38	0.45	0.41	0.37	0.31	0.52	0.34	0.39	0.3	0.48
chr1	G	7712957	CG	0.29	0.23	0.3	0.34	0.19	0.38	0.36	0.29	0.3	0.2	0.33	0.35	0.27	0.3	0.44
chr1	G	7712961	CG	0.32	0.31	0.34	0.4	0.28	0.39	0.43	0.36	0.37	0.31	0.43	0.34	0.37	0.35	0.43
chr1	G	7712992	CG	0.84	0.86	0.82	0.89	0.88	0.89	0.89	0.86	0.92	0.8	0.9	0.88	0.85	0.87	0.84
chr1	C	7713146	CG	0.96	0.95	0.95	1	1	0.98	0.93	1	0.96	0.96	1	1	0.78	1	0.95
chr1	C	7713174	CG	0.96	0.95	1	0.89	0.96	1	0.98	0.96	0.98	1	0.97	1	1	1	1
chr1	C	7713178	CG	1	1	1	1	0.98	0.95	0.93	0.92	0.98	0.96	1	0.96	1	1	0.92
chr1	C	7742011	CG	0.06	0.04	0.05	0.07	0.11	0.12	0.17	0.14	0.06	0.12	0	0.13	0.08	0	0.12
chr1	C	7742018	CG	0.09	0.07	0.09	0	0.03	0.14	0.05	0.09	0	0.09	0.13	0.11	0	0	0
chr1	C	7742101	CG	0.98	0.9	0.94	0.97	0.93	0.87	1	0.91	0.94	0.95	0.95	0.8	1	0.89	0.96
chr1	C	7742113	CG	0.84	0.93	0.9	0.88	0.93	0.98	0.92	0.97	0.99	0.95	0.97	0.86	0.95	0.9	0.89
chr1	C	7742118	CG	0.98	0.88	0.92	0.9	0.94	0.97	0.94	0.99	0.97	0.98	0.97	0.96	0.98	0.95	0.95
chr1	C	7742148	CG	0.95	0.77	0.83	0.83	0.89	0.97	0.92	0.82	0.76	0.85	0.98	0.79	0.97	0.7	0.76
chr1	G	7742149	CG	0.78	0.88	0.88	0.94	0.89	0.87	0.87	0.89	0.82	0.8	0.87	0.9	0.94	0.87	0.91
chr1	G	7742154	CG	0.93	0.94	0.88	0.9	0.94	0.95	0.89	0.88	0.85	0.92	0.96	0.84	0.85	0.92	0.94
chr1	G	7742164	CG	0.96	0.96	1	0.96	0.96	0.9	0.95	0.97	0.96	0.99	0.97	0.96	0.94	0.95	1
chr1	G	7742173	CG	0.88	0.88	0.87	0.92	0.9	0.83	0.86	0.9	0.84	0.83	0.91	0.83	0.74	0.93	0.86
chr1	G	7742175	CG	0.88	0.93	0.92	0.85	0.91	0.91	0.95	0.93	0.96	0.89	0.94	0.95	1	0.91	0.95
chr1	G	7742193	CG	0.9	0.96	0.91	0.88	0.89	0.87	0.94	0.9	0.89	0.9	0.83	0.9	0.97	0.96	0.95
chr1	C	7809916	CG	0.87	0.88	0.9	0.86	0.88	0.89	0.9	0.92	0.91	0.94	0.83	0.88	0.77	0.93	0.88
chr1	G	7815545	CG	0.97	1	0.95	1	1	1	1	1	1	0.86	1	1	0.96	1	0.92
chr1	G	7819690	CG	0	0.53	0.5	0.33	0.61	0.28	0.41	0.32	0.62	0.33	0.42	0.25	0.33	0.22	0.65
chr1	G	7819694	CG	1	0.92	0.97	0.96	0.67	0.84	0.88	0.95	0.86	0.97	0.9	0.91	0.8	0.79	0.87
chr1	G	7819696	CG	1	0.82	0.82	1	0.67	0.95	0.86	0.83	0.88	0.85	0.95	0.88	0.71	0.74	0.71
chr1	G	7819704	CG	0.93	0.93	0.97	1	0.77	0.86	0.86	0.64	0.83	0.76	0.89	1	0.93	0.79	0.87
chr1	G	7819721	CG	0.92	0.62	0.82	0.72	0.56	0.81	0.92	0.83	0.54	0.74	0.73	0.92	0.54	0.93	0.66
chr1	C	7819727	CG	0.71	0.7	0.71	0.57	0.78	0.9	1	1	1	1	0.71	0.86	0.17	0.57	0.75
chr1	G	7819728	CG	0.83	0.92	0.97	0.88	0.96	0.93	0.88	0.91	0.85	0.94	0.89	1	0.86	0.96	0.93
chr1	C	7995020	CG	0.92	1	1	0.85	1	0.94	1	0.96	0.82	0.93	0.96	0.95	0.92	1	1
chr1	C	7995051	CG	1	1	0.91	0.92	0.97	0.9	0.94	0.96	0.85	1	0.96	1	0.92	0.96	0.93
chr1	C	7995056	CG	0.87	0.95	0.91	1	0.93	0.9	1	0.85	1	0.93	0.89	1	0.75	0.96	0.89
chr1	C	7995061	CG	1	0.95	0.91	0.92	0.97	0.95	1	1	1	1	0.96	1	0.92	0.92	1
chr1	G	7995070	CG	0.93	0.91	0.98	0.96	0.96	0.98	1	0.94	0.92	0.95	0.92	0.97	1	0.94	1
chr1	G	8047005	CG	0.84	1	0.9	1	0.93	1	0.97	0.94	1	1	0.71	1	1	1	0.82
chr1	G	8047034	CG	0.88	1	0.97	0.78	0.92	0.88	0.87	0.98	0.96	1	1	1	1	1	1
chr1	G	8047037	CG	0.92	1	1	1	0.99	1	0.87	1	0.98	1	1	1	1	1	1
chr1	G	8047132	CG	0.71	0.68	0.68	0.74	0.65	0.74	0.64	0.76	0.85	0.76	0.84	0.68	0.64	0.73	0.79
chr1	G	8047160	CG	0.96	0.95	0.95	0.95	0.94	0.88	0.91	0.83	0.88	0.86	0.89	0.97	1	0.93	0.8
chr1	C	8068194	CG	1	0.84	0.85	1	1	1	1	1	0.95	0.93	1	1	0.92	0.91	1
chr1	C	8068235	CG	0.82	0.93	0.92	1	1	0.93	0.77	0.65	0.9	0.81	0.89	1	0.88	0.83	1
chr1	G	8068236	CG	0.89	0.92	0.92	0.84	0.87	0.94	0.84	0.94	0.92	0.89	0.86	0.94	0.99	0.9	0.89
chr1	G	8068251	CG	0.93	0.87	0.94	0.94	0.97	0.95	0.97	0.96	0.96	0.96	0.88	0.9	0.88	0.93	0.96
chr1	G	8068260	CG	0.93	0.92	0.93	0.96	0.98	0.95	0.96	0.95	0.92	0.97	0.91	0.98	0.94	0.93	0.94
chr1	G	8122845	CG	1	0.92	1	1	1	1	1	0.88	0.94	1	1	1	0.8	1	1
chr1	G	8122850	CG	1	0.67	1	0.73	0.81	1	1	1	0.94	1	0.94	0.91	1	1	1
chr1	G	8122856	CG	1	1	1	1	1	1	1	0.88	1	1	0.94	0.91	1	0.29	1
chr1	C	8122915	CG	1	0.86	0.94	0.89	0.79	0.87	0.89	0.88	0.86	0.94	0.79	0.68	0.85	0.84	0.82
chr1	C	8122921	CG	0.77	0.69	0.75	0.85	0.73	0.68	0.76	0.71	0.68	0.7	0.62	0.57	0.75	0.61	0.82
chr1	C	8122957	CG	0.85	0.96	0.92	0.91	0.86	0.87	0.89	0.95	0.9	0.96	0.85	0.89	1	0.9	0.84
chr1	G	8124672	CG	0	0.09	0	0.07	0	0	0	0	0	0	0	0	0	0	0
chr1	C	8157492	CG	1	0.89	0.93	0.9	0.81	1	1	1	1	0.93	1	0.71	1	0.93	0.94
chr1	C	8157497	CG	0.8	1	0.93	1	0.81	0.77	1	0.83	1	0.93	0.82	1	0.8	0.83	0.94
chr1	C	8157502	CG	1	1	1	0.56	0.9	0.92	1	1	0.9	0.93	1	0.86	1	1	0.94
chr1	G	8157511	CG	0.79	0.88	0.88	0.72	0.79	0.81	0.78	0.87	0.82	0.76	0.85	0.89	0.9	0.76	0.8
chr1	G	8157553	CG	0.95	0.98	0.99	0.94	0.92	0.95	0.94	0.97	1	0.95	1	0.89	0.97	0.92	0.97
chr1	G	8157556	CG	0.96	0.96	0.99	1	0.97	0.98	1	0.99	0.98	0.97	1	1	0.97	1	0.94
chr1	C	8166618	CG	0.59	0.72	0.5	0.7	0.69	0.62	0.63	0.7	0.63	0.57	0.6	0.65	0.44	0.59	0.65
chr1	G	8166741	CG	1	0.77	0.65	0.81	0.87	0.84	0.88	0.93	0.86	0.77	0.71	0.89	0.77	0.72	0.88
chr1	G	8166754	CG	0.93	0.86	0.79	0.88	0.97	0.92	0.97	0.98	0.91	1	0.88	0.93	1	0.94	1
chr1	G	8190669	CG	0.03	0	0	0.03	0.02	0	0	0	0	0	0	0	0	0.08	0
chr1	G	8190701	CG	0.97	0.94	0.92	0.94	0.92	0.85	0.95	0.91	0.91	0.93	0.95	0.91	0.9	0.97	0.97
chr1	G	8190704	CG	0.92	0.88	0.92	0.94	0.87	0.93	0.97	0.98	0.93	0.95	0.93	0.98	1	0.86	0.94
chr1	G	8190710	CG	0.89	1	0.96	0.97	0.98	0.98	0.97	0.91	0.99	1	1	0.98	1	0.94	0.97
chr1	C	8194453	CG	0.86	1	0.82	0.83	0.63	1	0.6	0.75	0.91	0.71	0.76	0.64	1	1	0.44
chr1	C	8249267	CG	0.95	1	0.82	0.89	0.88	0.9	0.96	1	0.84	0.83	0.94	0.97	0.79	0.92	0.85
chr1	C	8249292	CG	0.83	0.88	0.9	0.78	0.8	0.86	0.91	0.94	0.92	0.93	0.8	0.7	0.97	0.97	0.9
chr1	G	8249293	CG	0.86	0.88	0.81	0.85	0.91	0.79	0.99	0.85	0.92	0.96	0.7	0.94	0.95	0.86	0.96
chr1	G	8249320	CG	1	0.95	0.96	0.98	0.99	0.99	0.99	1	0.95	0.98	0.87	0.91	0.93	0.92	0.96
chr1	G	8249326	CG	0.87	0.94	0.9	0.88	0.9	0.76	0.91	0.79	0.98	0.97	0.85	0.86	0.93	0.92	0.96
chr1	C	8341641	CG	0.84	0.9	0.94	0.83	0.95	0.84	0.82	0.92	0.89	1	0.84	0.85	1	1	0.89
chr1	C	8380444	CG	0	0	0	0	0.06	0	0	0	0	0.04	0	0	0	0	0
chr1	C	8468778	CG	0.09	0.09	0.1	0.14	0.15	0.17	0.13	0.07	0.09	0.28	0.25	0.08	0.25	0.08	0.13
chr1	G	8468851	CG	0.06	0.25	0.3	0.25	0.21	0.23	0.14	0.22	0.21	0.22	0.26	0.35	0.3	0.19	0.28
chr1	G	8468857	CG	0.11	0.02	0.09	0.08	0.1	0.17	0.14	0.13	0.12	0.14	0.02	0.1	0.12	0.06	0.06
chr1	G	8509980	CG	0.74	0.83	0.9	0.69	0.44	0.31	1	0.74	0.87	0.85	0.5	1	0.83	0.63	0.82
chr1	G	8510019	CG	1	0.8	0.78	0.91	1	1	0.21	0.93	0.87	1	0.57	1	0.84	1	0.81
chr1	C	8534356	CG	0.78	0.67	0.72	0.81	0.68	0.75	0.71	0.75	0.61	0.64	0.5	0.61	0.72	0.81	0.75
chr1	G	8534429	CG	0.76	0.72	0.89	0.79	0.97	0.74	0.55	0.81	0.87	0.95	0.77	0.91	1	0.71	0.94
chr1	G	8534433	CG	0.95	0.94	0.94	0.92	0.88	1	0.55	1	0.88	0.95	0.86	1	1	1	0.8
chr1	C	8661096	CG	0.96	0.96	0.98	0.97	0.98	0.97	1	1	0.97	0.95	0.9	1	1	1	1
chr1	C	8661099	CG	0.64	0.47	0.49	0.43	0.42	0.49	0.94	0.96	0.94	0.86	0.85	0.91	0.8	1	1
chr1	G	8689285	CG	0	0.02	0	0.02	0	0	0	0	0	0	0.01	0	0	0.01	0.02
chr1	G	8689323	CG	0.88	0.88	0.91	0.88	0.84	0.92	0.91	0.91	0.91	0.92	0.85	0.91	0.88	0.89	0.95
chr1	G	8689330	CG	1	0.95	0.95	0.88	0.96	0.98	0.92	0.95	0.93	0.98	0.93	0.92	0.98	0.88	0.95
chr1	G	8720170	CG	0.75	1	0.88	1	1	1	1	0.93	1	1	1	1	0.79	1	0.89
chr1	G	8787140	CG	0.92	0.96	0.97	0.97	0.96	0.96	0.97	0.97	0.95	0.97	0.97	0.95	0.98	0.97	0.99
chr1	G	8787147	CG	0.91	0.93	0.92	0.95	0.95	0.93	0.84	0.84	0.87	0.84	0.92	0.89	0.94	0.9	0.94
chr1	G	8787163	CG	0.9	0.95	0.92	0.88	0.91	0.9	0.84	0.84	0.81	0.84	0.88	0.87	0.9	0.89	0.94
chr1	G	8787189	CG	0.96	0.94	0.93	0.95	0.89	0.93	0.96	0.93	0.9	0.93	0.94	0.93	0.98	0.96	0.95
chr1	C	8788531	CG	0.71	0.85	1	0.79	0.7	0.86	0.7	0.92	1	0.75	0.89	0.81	1	0.75	1
chr1	C	8788536	CG	0.93	1	1	0.86	1	0.97	0.9	0.83	0.92	0.95	0.75	0.9	1	0.77	0.75
chr1	G	8956161	CG	0.92	0.92	0.88	0.94	0.92	0.98	0.98	0.93	0.94	0.99	0.89	1	0.69	0.86	0.93
chr1	G	8956176	CG	0.95	0.99	0.94	0.93	0.96	0.98	0.99	0.99	0.97	0.99	0.96	1	0.86	0.94	0.91
chr1	C	8983310	CG	0.85	0.9	0.94	0.82	0.86	0.87	0.88	0.93	0.83	0.9	0.76	0.78	0.89	0.82	0.87
chr1	G	9120951	CG	0.04	0.09	0.04	0.03	0.05	0	0.11	0.07	0.03	0.07	0.04	0.07	0.09	0.02	0.06
chr1	G	9120980	CG	0.9	0.96	0.96	0.95	0.96	0.92	0.89	0.94	1	0.98	1	1	0.95	0.98	0.98
chr1	G	9120984	CG	0.97	0.95	1	0.97	0.93	1	0.89	0.94	0.97	0.93	0.93	0.93	0.95	0.97	0.96
chr1	G	9120989	CG	0.86	0.91	0.83	1	0.96	0.92	0.89	0.94	0.92	0.95	0.86	0.93	0.92	0.94	0.95
chr1	G	9120996	CG	0.93	0.98	0.96	1	0.96	1	0.89	0.94	1	0.88	0.96	1	0.92	0.98	0.96
chr1	C	9237282	CG	0.3	0.27	0.47	0.41	0.24	0.27	0.11	0.21	0.39	0.35	0.18	0.39	0.27	0.29	0.33
chr1	G	9237366	CG	0.27	0.33	0.32	0.25	0.32	0.26	0.31	0.38	0.32	0.37	0.33	0.23	0.34	0.34	0.29
chr1	G	9237374	CG	0.24	0.33	0.25	0.2	0.28	0.32	0.29	0.3	0.3	0.26	0.22	0.17	0.32	0.23	0.22
chr1	C	9240544	CG	0.43	0.75	0.77	0.6	0.88	0.69	0.9	1	0.86	0.5	0.82	0.72	0.67	0.75	0.78
chr1	C	9240758	CG	0.91	0.8	0.94	0.86	0.86	0.88	0.83	0.83	0.87	0.89	0.8	0.91	0.8	0.81	0.79
chr1	C	9240785	CG	0.8	0.75	0.71	0.63	0.88	1	0.5	0.93	0.69	0.56	0.71	0.8	0.69	0.6	0.73
chr1	C	9240803	CG	0.7	0.88	1	0.5	0.84	0.75	0.67	0.87	0.81	0.7	0.76	0.8	0.94	0.83	1
chr1	C	9240849	CG	0.89	0.92	0.7	0.96	0.86	0.89	0.92	0.86	0.83	0.94	0.82	0.75	0.86	0.91	0.77
chr1	C	9240869	CG	0.82	0.93	0.85	0.83	0.82	0.82	0.85	0.84	0.69	0.81	0.92	0.94	0.9	0.75	0.88
chr1	C	9240885	CG	0.89	0.95	0.84	0.96	0.91	0.89	0.8	0.96	0.8	0.73	1	0.93	0.88	0.92	0.91
chr1	C	9299253	CG	0.03	0.06	0.06	0.1	0.06	0.08	0.1	0.03	0.04	0.02	0.14	0.16	0.06	0.1	0.04
chr1	G	9299305	CG	0.02	0.04	0.01	0.01	0.03	0.01	0.03	0	0.03	0	0.15	0	0.07	0.01	0.05
chr1	G	9299316	CG	0	0	0	0	0.02	0	0	0	0.01	0.04	0.11	0	0.04	0	0.02
chr1	C	9299326	CG	0.07	0.14	0.05	0.06	0.07	0.08	0.13	0.08	0.1	0.02	0.06	0.05	0	0.06	0.15
chr1	G	9299327	CG	0.04	0.08	0.03	0	0.09	0.08	0	0.14	0.07	0	0.04	0.07	0.08	0.01	0.02
chr1	C	9299334	CG	0.03	0	0.04	0	0.01	0.04	0	0.01	0.01	0	0.05	0.02	0.02	0.03	0.02
chr1	C	9299342	CG	0	0.01	0	0.01	0.01	0	0	0.01	0.01	0	0.08	0.05	0.02	0.06	0.04
chr1	C	9299348	CG	0	0.01	0.01	0.01	0	0.01	0	0.03	0.01	0.01	0	0.02	0.02	0.06	0.02
chr1	C	9299353	CG	0	0	0	0.01	0	0	0.01	0.01	0.01	0	0	0.02	0.02	0	0
chr1	C	9299356	CG	0	0	0.03	0	0.05	0	0	0	0.01	0.04	0	0	0.02	0	0
chr1	G	9299437	CG	0.01	0.05	0.05	0.02	0.02	0.03	0.04	0.05	0.03	0.05	0	0.05	0	0	0.03
chr1	C	9299774	CG	0.07	0.11	0.07	0.1	0.07	0.11	0.05	0.05	0.05	0.06	0.05	0.03	0.1	0.08	0.06
chr1	C	9299786	CG	0	0	0.01	0	0.01	0.02	0.04	0	0.02	0.05	0.09	0.02	0	0.02	0.02
chr1	C	9299790	CG	0	0.04	0	0	0.01	0.01	0.03	0	0.01	0.01	0.1	0.01	0.02	0	0.02
chr1	C	9299799	CG	0.01	0.01	0.02	0.03	0.04	0.06	0.02	0.03	0.01	0.01	0.05	0	0	0.03	0.03
chr1	C	9299812	CG	0	0	0.05	0.03	0.01	0.04	0.02	0.01	0.01	0.02	0.09	0.02	0.02	0.03	0
chr1	C	9299823	CG	0.01	0.02	0.01	0.01	0.01	0.01	0	0	0.03	0	0.11	0.01	0.06	0	0.05
chr1	G	9299824	CG	0.01	0.02	0.01	0.02	0.01	0.01	0.01	0.03	0	0	0.17	0	0.03	0	0.01
chr1	G	9299826	CG	0.01	0.02	0.01	0	0.02	0.02	0	0	0	0.01	0.16	0	0	0.01	0.01
chr1	G	9299834	CG	0	0	0.03	0	0.01	0.02	0.03	0.02	0.07	0.01	0.07	0.08	0.01	0.06	0
chr1	G	9299853	CG	0.01	0.01	0.01	0	0.01	0.01	0	0.04	0	0	0.06	0	0	0	0.01
chr1	C	9299868	CG	0.03	0.07	0.11	0.04	0.06	0	0.01	0.05	0.09	0.07	0.04	0	0	0.14	0
chr1	G	9299869	CG	0.01	0.1	0.04	0.05	0.05	0.07	0.03	0.09	0.08	0.06	0.12	0.03	0.08	0.08	0.05
chr1	C	9299886	CG	0	0	0.03	0	0	0	0	0	0	0.01	0.01	0.02	0	0	0
chr1	C	9299901	CG	0.05	0	0	0.01	0.01	0.01	0	0	0	0	0	0	0	0	0
chr1	G	9299902	CG	0.02	0	0	0	0	0	0	0.01	0	0	0	0	0	0	0
chr1	C	9299905	CG	0	0.02	0.01	0.06	0.01	0	0	0.01	0	0	0.01	0	0	0	0.01
chr1	G	9299906	CG	0.06	0	0.02	0.04	0	0.01	0	0	0.03	0	0.03	0	0	0	0
chr1	C	9299912	CG	0	0.01	0	0.02	0.02	0	0.04	0.03	0	0	0.03	0.02	0	0	0
chr1	G	9299913	CG	0	0	0.03	0.07	0.01	0	0	0	0.02	0	0.13	0	0	0	0.07
chr1	G	9299924	CG	0	0.01	0.04	0.02	0	0.04	0	0	0.02	0.08	0.07	0	0	0.02	0.01
chr1	G	9299926	CG	0	0.02	0.03	0.01	0.01	0	0	0	0.03	0.04	0.06	0	0	0	0
chr1	G	9299938	CG	0.02	0.06	0.04	0.02	0.07	0.05	0.1	0.01	0.11	0.01	0	0.08	0	0.02	0.02
chr1	C	9384920	CG	1	0.58	1	1	1	1	1	1	0.53	0.6	0.83	1	0.92	1	0.9
chr1	C	9384949	CG	1	1	1	0.8	0.96	1	0.91	1	0.53	1	1	1	1	1	1
chr1	C	9384955	CG	1	1	1	1	1	1	1	1	1	0.67	1	0.91	1	1	1
chr1	C	9384966	CG	0.85	1	1	1	0.96	1	1	1	1	1	1	1	1	1	1
chr1	G	9391178	CG	0	0	0.01	0.01	0	0	0	0	0.01	0	0	0.02	0	0	0.04
chr1	G	9401902	CG	0.71	0.81	0.41	0.77	0.61	0.94	0.36	0.52	0.45	0.5	0.62	0.27	0.6	0.7	0.53
chr1	G	9488691	CG	0.77	0.82	0.84	0.85	0.87	0.83	0.84	0.86	0.84	0.86	0.8	0.84	0.88	0.78	0.94
chr1	G	9488704	CG	0.97	0.91	0.97	0.93	0.97	0.96	0.99	0.94	0.97	0.97	0.92	0.98	1	0.94	0.96
chr1	G	9506566	CG	1	0.9	0.82	0.75	0.94	0.92	0.93	0.94	0.65	1	1	0.71	0.83	0.93	0.86
chr1	C	9515332	CG	0.9	0.97	0.96	0.98	0.94	0.95	0.96	0.92	0.96	0.92	0.9	0.94	0.94	0.97	0.97
chr1	G	9544698	CG	0.73	0.73	0.74	0.69	0.68	0.71	0.72	0.74	0.71	0.71	0.71	0.64	0.71	0.78	0.7
chr1	C	9545289	CG	0.04	0.09	0.07	0.21	0.08	0.18	0	0.05	0.09	0.02	0	0	0	0.08	0.04
chr1	C	9545295	CG	0.01	0	0	0.01	0	0	0	0.02	0	0.02	0	0	0	0	0
chr1	C	9545308	CG	0	0	0	0.01	0	0	0	0	0	0	0	0	0	0	0
chr1	G	9545309	CG	0	0.01	0	0	0.02	0	0	0	0	0.01	0	0	0	0.02	0.01
chr1	C	9545337	CG	0.01	0.01	0.03	0.01	0	0.02	0.17	0	0	0	0	0	0	0.01	0
chr1	G	9545338	CG	0.02	0.06	0	0.01	0.01	0.02	0.02	0.01	0.02	0.01	0.02	0.01	0	0	0.01
chr1	G	9545348	CG	0.01	0.04	0.09	0	0.08	0.04	0.04	0.03	0.02	0.19	0	0.05	0.07	0.05	0.11
chr1	G	9545363	CG	0	0	0	0	0	0	0	0	0	0	0.05	0	0	0	0
chr1	G	9545378	CG	0	0	0	0	0.06	0	0	0	0	0	0	0	0	0	0
chr1	G	9545393	CG	0	0	0	0.2	0.18	0	0.11	0	0	0	0.13	0.05	0	0	0
chr1	C	9545693	CG	0.01	0.08	0.07	0.02	0.07	0.03	0	0.01	0.12	0.17	0.05	0	0.04	0	0
chr1	C	9545700	CG	0.01	0.01	0	0.01	0	0.02	0	0.03	0.01	0.06	0.03	0	0	0.04	0
chr1	C	9545707	CG	0.02	0	0.01	0	0.01	0	0	0.01	0.01	0.03	0.03	0	0	0	0
chr1	C	9545717	CG	0	0.02	0.01	0	0.01	0.03	0.01	0	0	0	0.03	0	0	0	0
chr1	C	9545719	CG	0	0	0	0	0	0.02	0	0.01	0	0.02	0	0	0	0	0
chr1	C	9545729	CG	0.02	0.01	0.02	0	0	0	0	0.01	0	0	0	0	0	0	0
chr1	G	9545756	CG	0	0	0	0.02	0.01	0.03	0.01	0.03	0	0	0	0	0	0	0
chr1	G	9545763	CG	0.02	0	0	0.01	0.01	0	0	0.01	0	0	0	0	0	0	0
chr1	G	9545767	CG	0	0	0	0	0.01	0	0	0	0	0	0	0.05	0	0	0
chr1	G	9545771	CG	0	0.01	0.01	0.01	0	0.03	0.03	0	0	0.07	0	0	0	0	0
chr1	G	9545773	CG	0.02	0.01	0	0.01	0	0	0	0.02	0	0	0	0	0	0.02	0.03
chr1	G	9545784	CG	0	0	0.03	0	0.01	0.05	0	0	0	0	0	0	0	0	0
chr1	G	9545791	CG	0	0	0	0	0	0	0	0.03	0	0	0.02	0	0	0.02	0
chr1	G	9545793	CG	0.06	0	0	0.01	0.03	0	0	0	0	0	0	0.04	0.05	0	0
chr1	G	9545795	CG	0	0	0	0.01	0.01	0	0.06	0	0.02	0	0	0	0	0.02	0
chr1	G	9545802	CG	0	0.05	0.01	0.03	0.02	0.03	0.03	0.01	0.05	0.01	0.09	0.05	0.05	0.07	0
chr1	C	9546138	CG	0	0.09	0.12	0.33	0.07	0.1	0	0.04	0.06	0.11	0	0.08	0	0.2	0.09
chr1	C	9546181	CG	0	0	0.04	0	0.03	0	0	0.02	0	0	0	0	0	0	0
chr1	C	9546183	CG	0	0	0.04	0	0	0	0	0	0.03	0	0	0	0	0	0
chr1	G	9546211	CG	0	0	0	0	0	0	0	0	0	0	0	0.11	0	0	0
chr1	G	9546216	CG	0	0	0.06	0.02	0.04	0.04	0	0.03	0	0	0	0.09	0	0.22	0
chr1	G	9546224	CG	0.08	0	0	0	0	0	0	0	0	0	0	0	0	0	0
chr1	G	9546236	CG	0	0.05	0	0	0.03	0.09	0	0	0	0	0	0	0	0	0
chr1	G	9546260	CG	0	0.2	0.32	0.1	0.17	0.11	0.19	0.1	0.08	0	0.05	0	0	0.1	0
chr1	C	9548587	CG	0.4	0.33	0.44	0.42	0.49	0.36	0.54	0.42	0.46	0.32	0.45	0.48	0.43	0.38	0.39
chr1	G	9548664	CG	0.26	0.13	0.29	0.1	0.15	0.24	0.13	0.24	0.33	0.15	0.45	0.23	0.37	0.17	0.36
chr1	C	9629949	CG	0.16	0.25	0.11	0.18	0.18	0.25	0.05	0.27	0.16	0.07	0.2	0.31	0.03	0.24	0.24
chr1	G	9630041	CG	0.06	0.14	0.03	0.06	0.06	0.04	0.06	0.05	0.05	0.14	0.08	0.06	0.07	0.06	0.13
chr1	G	9630054	CG	0.1	0.11	0.1	0.13	0.14	0.09	0.02	0.07	0.05	0.1	0.11	0.06	0.11	0.07	0.1
chr1	C	9639128	CG	0.28	0.35	0.4	0.39	0.47	0.45	0.37	0.39	0.51	0.39	0.47	0.33	0.21	0.28	0.36
chr1	C	9639158	CG	0.45	0.53	0.51	0.58	0.6	0.54	0.61	0.4	0.56	0.53	0.54	0.41	0.25	0.38	0.54
chr1	G	9639159	CG	0.56	0.53	0.61	0.57	0.62	0.6	0.63	0.64	0.47	0.56	0.53	0.63	0.62	0.48	0.51
chr1	G	9639200	CG	0.4	0.32	0.32	0.31	0.31	0.33	0.35	0.45	0.34	0.34	0.39	0.3	0.38	0.29	0.31
chr1	C	9648936	CG	0.11	0	0	0	0	0	0	0	0	0	0	0	0.17	0	0.07
chr1	G	9699912	CG	0	0	0	0	0.01	0	0	0	0	0	0	0	0	0	0
chr1	G	9699918	CG	0	0.02	0	0	0.01	0.05	0	0	0	0	0	0	0	0.12	0
chr1	C	9700096	CG	0	0	0	0	0.12	0	0.15	0.18	0.06	0	0	0	0.5	0	0.04
chr1	C	9700115	CG	0	0	0.04	0	0	0.08	0.03	0.02	0	0	0	0	0	0	0.03
chr1	C	9700136	CG	0	0	0.02	0	0.01	0	0	0.02	0	0	0	0	0	0	0
chr1	G	9700137	CG	0	0.04	0	0	0.01	0	0	0	0	0	0	0	0	0	0
chr1	G	9700162	CG	0	0.04	0	0	0	0	0	0	0	0	0	0	0	0	0
chr1	G	9700164	CG	0	0	0	0	0	0	0	0	0	0	0	0	0	0	0
chr1	C	9700167	CG	0	0	0	0.09	0.2	0	0	0.17	0.12	0.08	0.13	0	0	0	0
chr1	G	9700168	CG	0.14	0	0.06	0	0.05	0.07	0	0.1	0	0	0	0	0	0.17	0.12
chr1	C	9700173	CG	0.08	0.01	0	0	0.07	0.05	0	0	0.04	0	0	0	0.04	0.02	0.03
chr1	C	9700204	CG	0	0	0	0	0	0.02	0	0	0	0	0	0	0	0	0
chr1	C	9700212	CG	0	0	0	0.05	0	0	0	0.02	0	0	0	0	0	0	0
chr1	C	9700216	CG	0	0	0	0	0.01	0.07	0	0	0	0	0	0	0	0	0
chr1	C	9700219	CG	0.02	0	0.04	0.06	0.02	0.02	0	0	0	0	0.2	0.05	0	0	0
chr1	C	9700222	CG	0	0	0.03	0.06	0.01	0.02	0	0	0	0	0	0	0	0	0
chr1	C	9700501	CG	0	0.08	0	0	0.05	0	0	0	0	0	0	0	0	0	0
chr1	C	9700527	CG	0	0	0	0	0.05	0	0	0	0	0	0	0	0	0	0
chr1	C	9700529	CG	0	0	0	0	0.05	0	0	0	0	0	0	0	0	0	0
chr1	G	9700555	CG	0	0	0	0	0	0	0	0	0	0	0	0	0	0	0
chr1	G	9700566	CG	0	0	0	0	0	0	0	0	0	0	0	0	0	0	0
chr1	G	9700571	CG	0.04	0	0	0	0	0	0	0	0	0	0	0	0	0	0
chr1	G	9700585	CG	0	0	0	0	0	0	0	0	0	0	0	0	0	0.03	0
chr1	G	9700587	CG	0	0	0.02	0	0	0	0	0	0.08	0.08	0	0	0	0	0
chr1	C	9700592	CG	0.06	0.11	0.07	0.1	0.03	0.06	0.03	0.05	0.06	0.08	0.08	0.1	0.04	0.05	0.1
chr1	G	9700593	CG	0	0	0	0.04	0.07	0	0	0.06	0.04	0	0	0	0	0.03	0
chr1	C	9700599	CG	0	0	0	0	0.01	0	0	0	0	0	0.01	0.01	0	0	0
chr1	C	9700604	CG	0	0	0	0	0	0	0	0	0	0	0.02	0	0.01	0	0
chr1	C	9700619	CG	0	0.01	0	0.01	0	0.01	0.01	0	0.02	0	0	0	0	0	0
chr1	C	9700624	CG	0	0	0	0	0	0	0	0	0	0	0	0	0.03	0	0
chr1	C	9700626	CG	0.01	0	0	0	0	0	0	0	0	0.03	0.01	0	0	0.01	0.01
chr1	G	9700649	CG	0	0.02	0	0.01	0	0	0	0.01	0.04	0	0	0.01	0	0.01	0
chr1	G	9700651	CG	0	0.01	0.03	0.01	0	0.01	0.01	0	0.02	0.02	0	0	0	0.01	0.02
chr1	G	9700669	CG	0.01	0.01	0	0.01	0	0	0	0	0.01	0	0.06	0	0	0.02	0
chr1	G	9700679	CG	0	0.01	0.03	0.01	0	0	0.01	0.01	0	0	0	0.01	0	0.02	0
chr1	G	9700684	CG	0.05	0.03	0.04	0.06	0.08	0.05	0.12	0.06	0	0.06	0.06	0.04	0.03	0.03	0.01
chr1	C	9747604	CG	0.09	0.06	0.08	0.07	0.06	0.1	0.02	0.08	0.09	0.03	0.08	0.12	0.05	0.05	0.08
chr1	C	9747609	CG	0.01	0.01	0.01	0.01	0.01	0.02	0	0.02	0	0.01	0.01	0	0	0	0
chr1	C	9747637	CG	0.01	0.02	0.01	0	0	0	0	0	0	0	0	0.02	0	0	0
chr1	G	9747638	CG	0.01	0.03	0	0.01	0	0	0.02	0	0	0.01	0.01	0	0	0.03	0
chr1	C	9747649	CG	0	0	0.01	0.01	0	0	0	0	0	0	0.02	0	0	0.01	0
chr1	G	9747650	CG	0.01	0.02	0.01	0	0.01	0.01	0	0	0	0.01	0	0	0	0	0
chr1	G	9747664	CG	0.14	0.07	0.07	0.1	0.05	0.07	0.03	0.04	0.06	0.01	0.05	0.05	0.04	0.05	0.03
chr1	C	9747887	CG	0.05	0.03	0.07	0.07	0.07	0	0.02	0.01	0.12	0.05	0.09	0.09	0	0.03	0.13
chr1	C	9747892	CG	0	0	0	0.01	0	0	0	0.01	0	0	0.02	0	0	0	0
chr1	C	9747928	CG	0	0	0	0	0	0	0.01	0	0.01	0	0	0	0	0	0
chr1	G	9747929	CG	0	0	0	0	0	0	0	0	0	0	0.01	0	0	0	0
chr1	C	9747933	CG	0.01	0	0	0.02	0.01	0	0	0	0	0.01	0	0	0	0	0
chr1	G	9747934	CG	0	0	0.01	0	0	0	0	0	0	0.02	0.01	0	0	0	0.01
chr1	G	9747941	CG	0	0.01	0	0	0.01	0	0	0.01	0.01	0	0	0	0	0	0.05
chr1	G	9747947	CG	0.01	0	0	0	0.01	0.01	0.02	0	0	0	0	0	0.03	0	0
chr1	G	9747956	CG	0	0	0	0.02	0	0.01	0	0.02	0	0	0	0	0	0	0
chr1	G	9747972	CG	0	0	0.01	0.01	0	0	0.01	0	0.01	0	0	0.01	0	0	0
chr1	G	9747978	CG	0.11	0.05	0.08	0.09	0.04	0.04	0.07	0.04	0.05	0.03	0.08	0	0.05	0.03	0.05
chr1	G	9747991	CG	0	0	0.08	0	0	0.11	0	0	0	0	0	0	0	0	0
chr1	G	9747993	CG	0	0	0	0	0	0	0	0	0	0	0	0	0.08	0	0.13
chr1	G	9748050	CG	0	0.25	0	0	0	0.06	0	0.05	0	0	0	0	0	0	0
chr1	G	9748062	CG	0	0.09	0.4	0	0.06	0.2	0.14	0.05	0.13	0.2	0	0	0	0.14	0.21
chr1	C	9748218	CG	0.08	0.03	0.08	0.08	0.06	0.1	0.05	0.04	0.01	0.01	0.04	0.07	0	0.05	0.03
chr1	C	9748223	CG	0	0	0.06	0.01	0.03	0	0.03	0	0.04	0	0.01	0	0	0.01	0
chr1	C	9748226	CG	0.03	0	0	0	0.01	0.04	0	0.01	0	0	0	0	0	0	0
chr1	C	9748249	CG	0	0.01	0	0	0	0	0	0.01	0	0	0.01	0.01	0	0.01	0.06
chr1	G	9748292	CG	0	0	0.01	0	0	0	0.02	0	0	0.01	0	0	0.03	0	0
chr1	G	9748298	CG	0	0	0	0	0.01	0	0.01	0	0	0.01	0	0.01	0	0.01	0.01
chr1	G	9748304	CG	0.01	0	0.01	0.01	0.01	0	0	0	0	0.04	0.04	0	0	0	0.01
chr1	G	9748307	CG	0.06	0.08	0.07	0.13	0.06	0.04	0.03	0.02	0.11	0.08	0.09	0.04	0.06	0.07	0.01
chr1	C	9784217	CG	0.67	0.5	0.86	0.69	0.89	0.79	0.59	0.68	0.57	0.86	0.59	0.75	0.71	0.73	0.5
chr1	C	9797914	CG	0.05	0.04	0.03	0.06	0.05	0.07	0.05	0.07	0.06	0.06	0.06	0.01	0.07	0.07	0.07
chr1	C	9797922	CG	0.02	0.01	0	0.01	0	0.01	0	0	0	0.01	0.01	0.01	0	0	0.01
chr1	C	9797943	CG	0	0	0	0	0	0	0.01	0	0.02	0.01	0.02	0	0	0	0
chr1	G	9797944	CG	0.01	0	0.01	0	0.01	0.02	0	0	0	0.01	0.01	0	0	0	0
chr1	C	9797946	CG	0	0	0.01	0.02	0.01	0.01	0	0.01	0.02	0	0.02	0.01	0.01	0	0.01
chr1	G	9797947	CG	0	0	0.01	0	0.01	0	0	0	0	0	0.01	0.02	0	0	0
chr1	C	9797948	CG	0.01	0	0.01	0.01	0	0.01	0.01	0.01	0	0.02	0	0.01	0	0	0
chr1	G	9797949	CG	0	0	0.01	0.04	0	0	0.01	0	0.03	0	0.03	0.01	0	0	0.01
chr1	C	9797955	CG	0	0	0.01	0	0	0.02	0	0.01	0.02	0	0	0	0.04	0.02	0
chr1	G	9797956	CG	0.02	0	0.01	0	0.01	0.01	0	0	0	0.01	0.01	0	0	0	0
chr1	C	9797957	CG	0.01	0	0	0	0	0	0	0.01	0.01	0.02	0.02	0	0	0.01	0
chr1	G	9797958	CG	0.01	0	0.01	0.01	0.01	0.01	0.01	0.02	0	0.01	0.01	0.01	0.01	0.01	0.01
chr1	G	9797965	CG	0	0	0	0	0	0	0.01	0	0	0	0.01	0.01	0	0	0
chr1	G	9797976	CG	0	0.01	0	0	0	0.01	0	0	0	0.03	0	0.01	0	0.02	0
chr1	C	9797985	CG	0.15	0.01	0.03	0.01	0.07	0.11	0.12	0.01	0.02	0.02	0	0.02	0.03	0.03	0.07
chr1	G	9797986	CG	0.06	0.06	0.05	0.07	0.08	0.07	0.05	0.09	0.08	0.08	0.06	0.04	0.05	0.04	0.05
chr1	C	9797988	CG	0.01	0	0	0	0.01	0	0	0.07	0	0	0	0.02	0	0.05	0
chr1	C	9797991	CG	0	0.01	0.02	0	0	0	0.01	0	0	0	0.02	0	0	0	0.01
chr1	C	9798015	CG	0	0	0.02	0	0.01	0	0	0.01	0	0.03	0	0	0	0.01	0.06
chr1	C	9798017	CG	0.03	0	0	0	0.01	0	0	0	0	0	0	0	0.03	0.01	0
chr1	C	9798022	CG	0	0	0	0.01	0.01	0	0	0	0	0	0	0	0	0.02	0
chr1	G	9798023	CG	0	0	0.01	0.02	0.01	0	0.01	0	0	0	0	0.05	0	0	0
chr1	C	9798026	CG	0	0	0.03	0.04	0.01	0	0	0	0.01	0	0	0.02	0.07	0.03	0.01
chr1	G	9798027	CG	0	0	0.01	0.01	0.01	0	0.01	0	0	0	0	0	0	0	0
chr1	C	9798030	CG	0	0	0	0	0.02	0.03	0	0.01	0	0	0	0	0	0	0
chr1	G	9798031	CG	0	0	0.02	0.01	0.01	0	0.04	0.01	0.01	0.02	0	0	0	0	0
chr1	C	9798032	CG	0	0.03	0	0	0.03	0	0.01	0	0.03	0.02	0	0	0.03	0	0
chr1	G	9798033	CG	0	0	0	0	0.01	0	0	0	0	0	0	0	0	0	0
chr1	G	9798041	CG	0.01	0.02	0.01	0	0	0	0	0	0.01	0.04	0	0	0	0.02	0
chr1	G	9798045	CG	0	0.01	0	0	0.01	0	0	0	0	0	0	0	0.02	0.02	0
chr1	G	9798051	CG	0	0	0.05	0.02	0.01	0	0.03	0.04	0.01	0.01	0	0.01	0	0	0.02
chr1	G	9798058	CG	0	0	0.02	0	0	0	0	0.01	0	0	0	0	0	0	0
chr1	G	9798060	CG	0	0	0	0	0	0	0	0.01	0	0	0	0	0	0	0
chr1	G	9798062	CG	0	0	0	0.01	0.01	0	0	0	0.01	0	0	0	0	0	0.04
chr1	C	9798068	CG	0.02	0.2	0.13	0.14	0.03	0.02	0.07	0	0.05	0	0.15	0.03	0	0.02	0
chr1	G	9798069	CG	0.15	0.07	0	0.04	0.07	0.04	0.09	0.07	0.01	0	0.32	0	0.07	0.05	0.07
chr1	C	9798072	CG	0.02	0	0.02	0	0.01	0	0	0	0.05	0	0.04	0	0	0	0
chr1	C	9798078	CG	0	0	0	0	0	0	0	0	0.01	0	0	0	0	0	0
chr1	C	9798081	CG	0	0	0	0	0.02	0	0	0	0.03	0	0.04	0	0	0	0
chr1	C	9798089	CG	0	0	0	0	0.01	0	0.04	0.03	0	0	0	0	0	0	0.02
chr1	C	9798091	CG	0	0	0	0.05	0	0	0	0.01	0.01	0	0	0	0	0	0.02
chr1	C	9798094	CG	0.07	0	0.02	0	0.01	0	0	0.06	0.01	0	0	0	0	0.02	0
chr1	C	9798098	CG	0	0	0.08	0	0.01	0	0	0.02	0.01	0	0	0	0	0	0
chr1	C	9798102	CG	0.02	0.04	0	0	0	0	0	0.01	0	0	0.04	0	0	0	0
chr1	C	9798106	CG	0	0	0	0.03	0.03	0	0	0.01	0.06	0	0	0	0	0	0
chr1	C	9798110	CG	0	0.02	0.02	0	0	0.02	0	0.07	0	0	0	0	0	0	0.05
chr1	C	9798113	CG	0	0	0	0.03	0.04	0	0.14	0	0.01	0	0	0	0	0	0
chr1	C	9798117	CG	0.03	0.12	0.08	0.1	0.06	0.08	0.02	0.05	0.06	0.15	0.07	0.04	0.09	0.05	0.09
chr1	G	9798118	CG	0.07	0.01	0.01	0.03	0.01	0.01	0	0.05	0.03	0.07	0.04	0	0.02	0.03	0.01
chr1	C	9798120	CG	0.01	0	0.04	0	0.03	0.02	0.04	0	0	0.03	0.01	0	0.01	0.02	0.02
chr1	G	9798121	CG	0	0	0	0.01	0.01	0	0	0	0.02	0.15	0.05	0	0.02	0	0
chr1	C	9798125	CG	0	0.02	0	0.01	0	0	0	0.02	0	0	0.02	0	0	0.01	0.01
chr1	G	9798126	CG	0	0	0.01	0	0	0.02	0	0	0	0.01	0	0.02	0	0.01	0
chr1	C	9798127	CG	0.02	0.02	0	0	0	0	0	0.01	0.01	0	0.01	0	0	0	0
chr1	G	9798128	CG	0.01	0.02	0.01	0	0	0	0.01	0.01	0.01	0	0	0	0.02	0.01	0
chr1	C	9798137	CG	0	0	0	0	0.01	0.02	0	0.01	0	0	0	0.01	0	0	0.03
chr1	G	9798138	CG	0	0.01	0	0.01	0	0	0	0.02	0.02	0.01	0	0.01	0	0.01	0
chr1	C	9798140	CG	0	0.01	0	0	0	0.01	0.01	0.01	0	0	0.01	0.01	0	0	0.01
chr1	G	9798141	CG	0	0	0	0.01	0	0	0	0	0	0	0.01	0.02	0	0	0.03
chr1	C	9798145	CG	0	0	0	0	0	0	0	0	0	0	0.01	0	0	0	0
chr1	G	9798146	CG	0.03	0	0	0.02	0	0.01	0.01	0.01	0	0.02	0	0.01	0.02	0	0
chr1	C	9798147	CG	0	0.01	0	0	0	0.02	0.01	0	0.01	0	0	0.02	0.03	0	0.01
chr1	G	9798148	CG	0.01	0.01	0	0.02	0	0	0	0	0.01	0	0	0	0	0.01	0
chr1	C	9798161	CG	0	0	0	0	0	0.03	0	0.01	0.01	0	0.01	0.03	0.01	0.01	0
chr1	G	9798162	CG	0	0.01	0.02	0.01	0	0	0.01	0.01	0.01	0.05	0	0.01	0	0	0
chr1	C	9798164	CG	0.01	0.03	0.03	0.03	0.02	0.02	0.01	0.03	0.01	0.06	0.02	0.03	0.05	0.01	0.01
chr1	G	9798165	CG	0.13	0.06	0.02	0.1	0.04	0.04	0.04	0.14	0.12	0.19	0.07	0.11	0.02	0.03	0.05
chr1	C	9798348	CG	0.07	0.11	0.09	0.06	0.09	0.05	0.07	0.04	0.05	0.08	0.02	0.11	0.02	0.03	0.05
chr1	C	9798361	CG	0	0	0.01	0	0.01	0.03	0	0.01	0.01	0	0.01	0.01	0	0.01	0
chr1	G	9798362	CG	0.01	0	0	0.01	0.03	0	0	0.01	0	0	0	0	0	0	0.01
chr1	C	9798364	CG	0.02	0	0.02	0.01	0.02	0.03	0	0	0	0.01	0	0.01	0	0.01	0.02
chr1	G	9798365	CG	0	0	0.01	0	0	0.01	0.01	0	0	0	0	0	0	0	0
chr1	C	9798369	CG	0	0	0.01	0.01	0	0	0	0	0	0	0	0.01	0	0.01	0
chr1	G	9798370	CG	0	0.01	0	0.01	0	0	0	0.01	0.02	0	0	0	0.02	0.03	0.01
chr1	C	9798382	CG	0.02	0	0.03	0	0.01	0	0	0	0	0.02	0	0.01	0.06	0.02	0
chr1	G	9798383	CG	0.01	0	0.01	0	0.02	0.02	0.01	0	0	0	0	0	0	0.01	0
chr1	C	9798384	CG	0	0	0.01	0	0.01	0.02	0	0	0.01	0	0.01	0.02	0.06	0	0.03
chr1	G	9798385	CG	0	0.02	0	0.01	0.01	0	0	0	0.01	0	0.04	0	0	0	0
chr1	C	9798386	CG	0	0	0.01	0	0	0.02	0.01	0	0.01	0.01	0	0.01	0.02	0.01	0
chr1	G	9798387	CG	0	0	0.01	0.01	0	0	0.01	0	0	0	0.04	0	0	0.02	0
chr1	C	9798394	CG	0	0	0.02	0.01	0.01	0.01	0	0	0.01	0.02	0.01	0.01	0	0.01	0
chr1	G	9798395	CG	0	0.01	0	0	0.01	0	0	0.01	0.01	0	0	0	0	0.01	0
chr1	C	9798396	CG	0	0.02	0.01	0.02	0	0.03	0.02	0	0	0.02	0	0.01	0	0	0
chr1	G	9798397	CG	0	0	0	0.02	0	0.01	0	0.03	0.01	0.02	0	0	0	0	0.01
chr1	G	9798401	CG	0.01	0	0.03	0	0.01	0	0	0	0.03	0	0	0	0	0.03	0.08
chr1	G	9798406	CG	0	0.01	0.01	0.01	0.01	0	0	0	0.01	0.02	0	0.02	0	0.02	0
chr1	G	9798410	CG	0.11	0.07	0.06	0.05	0.07	0.06	0.1	0.03	0.04	0	0.03	0.08	0.01	0.03	0.09
chr1	G	9798418	CG	0	0	0	0	0.05	0	0	0	0	0	0	0.1	0	0.05	0
chr1	G	9798422	CG	0	0	0	0	0.11	0	0	0	0.04	0	0	0	0	0	0
chr1	G	9798430	CG	0	0	0	0	0	0	0	0	0	0.03	0	0	0	0	0
chr1	C	9798436	CG	0	0	0	0	0	0	0	0	0	0	0	0	0	0	0
chr1	G	9798437	CG	0	0	0	0	0	0	0	0	0.04	0	0	0	0	0	0
chr1	C	9798444	CG	0.06	0.07	0.08	0.12	0.07	0.03	0.07	0.04	0.17	0.03	0.02	0.09	0.04	0.02	0.03
chr1	G	9798445	CG	0.03	0.01	0.01	0.02	0.01	0.01	0.03	0.02	0.02	0.03	0.03	0.06	0.01	0	0.03
chr1	C	9798459	CG	0	0	0.02	0.01	0.01	0	0	0	0	0	0	0	0	0.01	0
chr1	G	9798460	CG	0	0.01	0.01	0.02	0	0.01	0	0.03	0	0.04	0	0	0	0	0
chr1	C	9798461	CG	0.04	0.03	0.01	0	0.02	0	0	0.01	0.01	0	0	0	0	0	0
chr1	G	9798462	CG	0.02	0	0	0.01	0	0.01	0	0.01	0	0	0	0	0.02	0	0.01
chr1	C	9798476	CG	0	0	0.02	0	0	0.01	0.02	0.01	0	0.01	0.01	0	0	0.01	0
chr1	G	9798477	CG	0.02	0.01	0.01	0	0.02	0.01	0	0	0.01	0.01	0	0	0	0.01	0
chr1	C	9798478	CG	0	0.01	0	0.01	0.01	0.01	0	0	0	0	0	0	0	0	0
chr1	G	9798479	CG	0	0.01	0	0	0	0	0	0	0	0	0.1	0	0.02	0.01	0
chr1	C	9798484	CG	0.05	0.01	0.03	0.01	0	0.01	0	0.01	0.02	0	0.09	0	0.09	0.02	0
chr1	G	9798485	CG	0.03	0	0.01	0.03	0.02	0.01	0.02	0.03	0.01	0.01	0	0.02	0.08	0.03	0.03
chr1	C	9798487	CG	0.01	0.05	0.04	0.01	0.02	0	0	0.05	0	0.06	0.03	0.02	0	0	0
chr1	G	9798488	CG	0.05	0.1	0.05	0.08	0.06	0.09	0.01	0.12	0.05	0.01	0.1	0	0.03	0.02	0.06
chr1	C	9798564	CG	0	0.09	0	0	0.08	0.05	0.2	0.29	0.13	0	0.22	0	0	0	0
chr1	C	9798575	CG	0	0	0	0	0	0.2	0	0	0.11	0	0.22	0	0	0	0
chr1	C	9798579	CG	0	0.08	0	0	0	0	0.2	0	0	0	0.11	0	0	0	0
chr1	C	9798583	CG	0	0	0	0	0	0	0.2	0	0	0.05	0.11	0	0	0	0
chr1	G	9801493	CG	1	0.78	0.73	0.82	0.88	0.79	0.9	0.6	0.93	1	0.59	1	1	0.79	0.5
chr1	G	9817801	CG	0.08	0	0	0.14	0.17	0	0	0.43	0.14	0	0.25	0	0.5	0.4	0.46
chr1	G	9848237	CG	0	0	0.1	0	0	0	0	0	0	0	0	0	0	0	0
chr1	G	9848243	CG	0	0	0	0	0	0	0	0	0	0.17	0	0.08	0	0	0
chr1	C	9848336	CG	0.09	0.1	0.04	0.11	0.15	0.2	0.05	0.03	0.05	0	0.13	0	0.1	0.03	0.13
chr1	G	9848337	CG	0.04	0.01	0.04	0.04	0.03	0	0	0	0.06	0.16	0	0	0.02	0	0.01
chr1	C	9848346	CG	0.01	0	0.03	0.02	0	0.07	0	0.01	0.08	0.04	0.04	0.03	0.04	0.01	0
chr1	G	9848347	CG	0.01	0.01	0.01	0.03	0.03	0	0	0.01	0	0.02	0.05	0	0.03	0.04	0.02
chr1	C	9848362	CG	0	0.01	0	0.05	0.04	0.07	0	0.01	0.06	0.01	0	0	0.02	0	0
chr1	G	9848363	CG	0	0	0	0	0.01	0	0	0.02	0.01	0	0.03	0	0.04	0	0
chr1	C	9848364	CG	0.02	0.02	0.03	0.05	0.03	0.07	0.07	0.02	0.09	0.01	0.1	0	0.05	0.01	0.01
chr1	G	9848365	CG	0.03	0	0.01	0	0.03	0	0.09	0	0.04	0.06	0.05	0	0.03	0.02	0.01
chr1	C	9848380	CG	0.03	0.04	0.01	0	0.1	0.14	0.04	0.01	0.02	0.06	0.04	0	0	0.03	0.01
chr1	G	9848381	CG	0.12	0.07	0.08	0.09	0.18	0.13	0.06	0.2	0.06	0.11	0.12	0.1	0.04	0.01	0.05
chr1	C	9848457	CG	0.13	0.22	0	0.25	0.21	0	0	0.03	0.09	0	0	0	0.11	0	0.04
chr1	G	9848458	CG	0	0	0	0	0.12	0.06	0	0	0	0	0	0	0.31	0.24	0.11
chr1	G	9848475	CG	0	0.04	0	0.06	0.35	0.8	0	0	0	0	0	0	0	0.14	0
chr1	G	9848488	CG	0	0.04	0	0	0	0	0.2	0	0	0	0	0	0	0.04	0
chr1	C	9848498	CG	0	0.13	0.14	0.02	0.11	0.1	0	0	0.1	0	0	0.03	0	0	0
chr1	G	9848499	CG	0.16	0.08	0.33	0	0.05	0.17	0	0.06	0.13	0	0	0	0.33	0	0
chr1	C	9848523	CG	0	0.03	0.1	0	0.04	0	0.03	0.03	0.07	0.17	0	0	0.03	0	0.04
chr1	C	9848527	CG	0	0	0.19	0.09	0	0	0.03	0.03	0	0.17	0	0	0	0	0
chr1	C	9848529	CG	0	0.07	0	0	0	0	0.03	0	0	0	0	0	0	0	0
chr1	G	9848605	CG	0.07	0.06	0	0	0.18	0	0	0	0.24	0	0	0	0	0.05	0.08
chr1	G	9848614	CG	0	0	0	0	0.06	0	0	0.12	0	0	0	0	0	0.09	0.13
chr1	G	9848625	CG	0.2	0.06	0	0.13	0.06	0.07	0	0.12	0.06	0	0	0	0	0.09	0.13
chr1	C	9857806	CG	0.59	0.7	0.79	0.79	0.68	0.47	0.82	0.96	0.88	0.61	0.7	0.41	0.75	0.65	0.6
chr1	C	9857809	CG	0.81	0.86	0.89	0.82	0.88	0.68	0.82	0.93	0.85	0.77	0.87	0.73	0.82	0.67	0.83
chr1	C	9857832	CG	0.83	0.95	0.88	0.89	0.9	0.78	0.96	0.99	0.97	0.86	0.81	0.9	0.93	0.82	0.9
chr1	C	9857843	CG	0.79	0.93	0.87	0.91	0.94	0.78	0.98	0.99	0.95	0.88	0.77	0.87	0.93	0.81	0.93
chr1	G	9857844	CG	0.86	0.8	0.8	0.86	0.89	0.9	0.61	0.86	0.98	0.68	0.81	0.89	1	0.97	0.94
chr1	G	9857883	CG	0.98	0.87	0.98	0.86	0.93	0.9	0.92	0.99	0.9	0.8	0.95	0.86	0.8	0.94	0.94
chr1	C	9861489	CG	0.5	0.87	0.74	0.81	0.61	0.6	0.59	0.64	0.63	0.58	0.81	0.57	0.85	0.62	0.74
chr1	C	9908762	CG	0.15	0.17	0.12	0.1	0.18	0.05	0.2	0.17	0.11	0.31	0.28	0	0	0.21	0.05
chr1	C	9908765	CG	0.03	0.58	0.16	0.19	0.21	0.26	0.14	0.16	0.18	0.26	0.47	0.04	0.35	0.21	0.35
chr1	C	9908774	CG	0.13	0.64	0.31	0.29	0.22	0.24	0.2	0.18	0.31	0.1	0.58	0.21	0.33	0.34	0.36
chr1	G	9908847	CG	0.28	0.22	0.03	0.34	0.16	0.36	0.3	0.17	0.11	0.15	0.29	0.27	0.27	0.14	0.23
chr1	G	9908877	CG	0.11	0.2	0.05	0.11	0.23	0.17	0.15	0.29	0.04	0.08	0.3	0	0.17	0.28	0.13
chr1	C	9943945	CG	0	0.02	0.12	0.03	0.05	0.08	0	0.03	0.08	0.1	0.07	0.08	0.02	0.01	0.06
chr1	C	9943955	CG	0.01	0.01	0	0	0	0	0	0	0	0.02	0	0.01	0	0	0
chr1	C	9943959	CG	0.03	0	0	0.03	0	0	0	0	0	0	0	0	0	0	0
chr1	C	9943962	CG	0	0	0	0.01	0	0	0	0	0	0	0	0	0	0.01	0.07
chr1	C	9943983	CG	0	0	0	0	0.01	0	0.01	0	0	0.07	0.01	0	0	0	0.01
chr1	C	9943991	CG	0.01	0	0	0.01	0	0.03	0.03	0.01	0	0	0.01	0	0	0	0
chr1	G	9944007	CG	0	0	0	0	0	0	0	0	0	0	0	0	0.08	0	0.02
chr1	G	9944016	CG	0	0	0.01	0	0.01	0	0	0.01	0	0	0	0	0.04	0.01	0
chr1	G	9944028	CG	0.03	0.01	0.02	0.02	0	0	0.01	0	0	0	0	0	0	0.03	0
chr1	G	9944040	CG	0.01	0.01	0.01	0	0.01	0.02	0.02	0	0	0.01	0.13	0	0	0	0.02
chr1	G	9944043	CG	0.06	0.08	0.13	0.08	0.07	0.13	0.03	0.05	0.07	0.01	0.03	0.07	0	0	0.07
chr1	G	9944173	CG	0	0.02	0	0	0.04	0	0.03	0	0	0.05	0	0.01	0	0	0
chr1	G	9944190	CG	0	0	0	0.08	0	0	0	0	0	0	0.01	0	0.03	0	0
chr1	G	9944196	CG	0	0.03	0	0	0	0.03	0.03	0	0	0	0	0	0	0	0
chr1	G	9944217	CG	0.04	0.09	0.11	0	0.03	0	0	0.06	0.13	0	0.03	0.12	0.15	0.03	0.11
chr1	C	9967353	CG	0.02	0	0.07	0.05	0.07	0.04	0	0.03	0.05	0.02	0.06	0.19	0	0.07	0.05
chr1	G	9967354	CG	0	0	0	0	0.01	0	0	0	0	0	0	0	0	0.04	0
chr1	C	9967358	CG	0	0.04	0.05	0	0.04	0.11	0	0	0.12	0	0.14	0	0.18	0	0.02
chr1	G	9967359	CG	0.11	0	0.02	0.03	0.04	0.06	0	0.12	0	0	0.05	0	0	0.08	0.06
chr1	C	9967360	CG	0	0.04	0.05	0	0	0.19	0	0	0	0	0	0	0	0	0
chr1	G	9967361	CG	0	0	0.03	0.05	0.04	0	0	0.1	0	0.03	0.06	0	0.14	0.04	0.02
chr1	C	9967363	CG	0	0.04	0	0	0.02	0.07	0	0	0	0.02	0	0	0.06	0	0
chr1	G	9967364	CG	0	0	0.02	0.05	0.02	0	0	0.26	0	0	0	0	0	0	0
chr1	C	9967365	CG	0	0.04	0	0.02	0.01	0.07	0	0	0	0	0.08	0	0.06	0	0
chr1	G	9967366	CG	0.11	0	0	0.05	0	0	0	0.1	0	0	0.05	0	0	0	0
chr1	C	9967371	CG	0	0.04	0	0	0	0.11	0	0.03	0	0.02	0.14	0	0.06	0.05	0
chr1	G	9967372	CG	0	0	0.03	0	0.02	0	0	0	0	0	0.02	0	0	0	0
chr1	C	9967389	CG	0.02	0	0	0	0	0	0	0.06	0.1	0	0	0	0	0.05	0.07
chr1	G	9967390	CG	0.19	0.09	0.09	0.02	0.05	0.19	0	0.16	0.1	0	0.14	0	0	0.04	0.02
chr1	C	9967395	CG	0.51	0.57	0.45	0.38	0.35	0.23	0.14	0.34	0.18	0.4	0.55	0.42	0.48	0.43	0.63
chr1	C	9967399	CG	0	0	0	0	0.01	0	0.01	0	0.01	0	0.05	0	0	0	0.05
chr1	C	9967416	CG	0.03	0.05	0	0.04	0	0.09	0	0.03	0.05	0	0	0	0	0.02	0
chr1	C	9967418	CG	0	0.01	0.01	0.04	0.01	0	0	0.09	0.01	0	0	0	0	0	0.09
chr1	C	9967422	CG	0	0.04	0.01	0.03	0.02	0	0.01	0.09	0.04	0	0	0	0.03	0	0
chr1	C	9967425	CG	0	0.04	0	0.01	0.06	0.07	0	0.03	0	0	0	0	0.06	0.04	0.05
chr1	C	9967428	CG	0	0.01	0	0.04	0.02	0.06	0.01	0.03	0	0	0	0	0	0	0
chr1	C	9967432	CG	0.09	0.09	0.03	0.08	0.05	0.06	0.07	0.08	0.02	0	0.05	0	0.09	0	0
chr1	C	9967435	CG	0	0.03	0	0.05	0.04	0	0.02	0.06	0.04	0.03	0	0	0.08	0	0.05
chr1	C	9967437	CG	0	0.1	0	0.01	0.07	0.07	0.05	0.03	0.03	0.02	0	0	0	0.02	0
chr1	C	9967440	CG	0	0.03	0.05	0.14	0.07	0.06	0.05	0.06	0	0	0	0.14	0.14	0.02	0.11
chr1	G	9967448	CG	0.01	0.05	0.06	0.09	0.05	0.08	0	0	0.07	0	0	0.07	0	0.08	0.06
chr1	G	9967450	CG	0.01	0.04	0.03	0.1	0.02	0.01	0.05	0.08	0.07	0	0	0	0	0	0.06
chr1	G	9967455	CG	0.03	0.04	0	0	0	0.01	0.01	0.04	0.02	0	0	0	0	0.02	0.38
chr1	G	9967468	CG	0	0.04	0	0.03	0.04	0.07	0.04	0	0.1	0	0	0	0	0.03	0.06
chr1	G	9967473	CG	0	0	0	0.02	0.05	0	0.05	0.05	0.13	0	0.02	0	0	0.03	0
chr1	G	9967477	CG	0.03	0.03	0	0	0.03	0.01	0.02	0.01	0.02	0	0.08	0	0	0	0
chr1	G	9967479	CG	0.06	0.04	0.01	0.02	0.03	0.04	0.05	0.03	0.02	0	0.08	0	0	0.05	0.29
chr1	G	9967489	CG	0.03	0.03	0	0.07	0.06	0.08	0.06	0.02	0.09	0.04	0	0	0	0.11	0
chr1	G	9967495	CG	0.06	0.04	0.03	0.02	0.07	0.01	0.17	0.04	0.12	0	0.13	0.15	0.05	0	0.18
chr1	C	9967509	CG	0	0	0.13	0.33	0.12	0.18	0	0.45	0.11	0	0.38	0.63	0	0.45	0.14
chr1	C	9967512	CG	0	0	0	0	0.1	0.09	0	0	0	0	0	0	0.33	0	0
chr1	C	9967529	CG	0	0	0.11	0	0	0	0.17	0	0.1	0	0	0	0.21	0	0
chr1	C	9967533	CG	0	0	0	0.29	0	0	0	0	0	0	0	0	0.07	0	0
chr1	C	9967537	CG	0	0	0	0	0	0	0	0	0.17	0	0	0	0	0	0
chr1	C	9967546	CG	0	0.07	0.03	0.05	0.08	0.04	0.01	0.06	0.06	0.02	0	0	0	0.02	0.15
chr1	C	9967552	CG	0	0.01	0.06	0.09	0.02	0.05	0.01	0.02	0.03	0.01	0.04	0	0	0.08	0
chr1	C	9967554	CG	0	0	0	0.03	0.01	0	0	0.02	0	0	0.02	0	0	0	0.12
chr1	C	9967560	CG	0.06	0	0	0	0.03	0.05	0.06	0.01	0.15	0.05	0.02	0	0	0	0.02
chr1	C	9967566	CG	0	0.06	0	0	0.05	0	0	0	0	0	0.08	0.01	0.03	0	0
chr1	C	9967572	CG	0	0.01	0	0	0.01	0	0	0	0	0	0	0	0	0	0.05
chr1	G	9967605	CG	0.02	0.1	0.01	0.1	0.04	0.05	0.02	0.06	0.14	0.06	0.07	0	0.04	0.09	0.04
chr1	C	9967622	CG	0.15	0.1	0.1	0.11	0.13	0.2	0.07	0.05	0.05	0.07	0	0.08	0	0.05	0.04
chr1	G	9967623	CG	0.19	0.1	0.04	0.07	0.08	0.12	0.09	0.08	0.1	0.04	0.06	0.05	0.12	0.17	0.03
chr1	C	9967629	CG	0.04	0.05	0	0	0.1	0.06	0.11	0	0	0.06	0	0	0	0	0.02
chr1	C	9967642	CG	0	0.09	0.12	0.01	0.07	0.02	0.11	0.03	0.07	0.12	0	0	0.09	0.03	0
chr1	C	9967646	CG	0.02	0.01	0.03	0.06	0.06	0.04	0	0	0.01	0	0.13	0.06	0	0.14	0
chr1	C	9967650	CG	0.02	0	0.04	0.02	0.1	0.02	0.05	0	0.01	0	0	0.16	0	0	0
chr1	C	9967654	CG	0.04	0.05	0	0.09	0.04	0.06	0.04	0	0.07	0	0	0.02	0	0.09	0
chr1	C	9967658	CG	0	0	0	0	0.02	0	0	0.03	0	0.02	0	0	0	0.08	0
chr1	C	9967662	CG	0.14	0.05	0.01	0.06	0.01	0	0	0.02	0.07	0.02	0.03	0	0	0.02	0
chr1	C	9967666	CG	0.13	0.01	0	0.05	0.02	0	0	0.02	0.01	0.12	0.03	0.18	0	0.02	0
chr1	C	9967670	CG	0.02	0	0.05	0.02	0.01	0	0	0.03	0.01	0	0	0.02	0	0	0
chr1	C	9967921	CG	0.08	0	0.01	0.14	0.08	0.07	0.01	0.08	0	0	0.05	0.05	0.06	0.11	0.08
chr1	C	9967927	CG	0.05	0.02	0.04	0.05	0.05	0	0.12	0	0	0.09	0	0.12	0	0.04	0.01
chr1	C	9967935	CG	0.02	0	0	0	0.02	0.02	0	0.05	0	0	0.06	0	0	0.07	0
chr1	C	9967938	CG	0.02	0.05	0	0.01	0.01	0	0	0	0	0	0.03	0.07	0	0	0
chr1	C	9967960	CG	0.03	0	0	0	0.01	0	0.09	0	0	0.01	0.01	0	0	0.07	0
chr1	G	9967961	CG	0.06	0.02	0.04	0.03	0.01	0	0.06	0	0.02	0	0	0	0	0.01	0.01
chr1	C	9967964	CG	0	0	0	0.06	0.01	0	0.01	0	0.04	0	0	0	0	0	0
chr1	G	9967965	CG	0	0	0.01	0.02	0.02	0	0.01	0	0	0	0	0.08	0	0	0
chr1	G	9967976	CG	0.07	0	0.01	0.05	0.02	0	0.04	0.01	0	0	0.12	0	0	0.07	0
chr1	G	9967980	CG	0	0	0.03	0.02	0.02	0.02	0	0.02	0	0	0	0	0	0	0
chr1	G	9967990	CG	0	0.02	0	0	0	0.03	0	0	0.01	0.02	0.03	0	0	0.01	0.01
chr1	C	9968002	CG	0.01	0.02	0.08	0.02	0.13	0.12	0.04	0.04	0.1	0.08	0.18	0.02	0.11	0	0.02
chr1	G	9968003	CG	0.21	0.02	0.04	0.03	0.04	0.06	0.03	0.03	0.13	0.03	0.03	0.02	0	0.04	0.05
chr1	C	9968023	CG	0	0	0.01	0	0.05	0.02	0.02	0.04	0	0	0	0.06	0	0	0.02
chr1	C	9968040	CG	0.01	0	0.01	0.02	0	0.01	0	0.01	0.02	0.01	0.03	0.01	0	0	0.01
chr1	C	9968197	CG	0	0.02	0	0.06	0.06	0.63	0	0.04	0.11	0.15	0.11	0	0	0	0
chr1	G	9968198	CG	0	0.1	0	0	0.02	0	0.04	0.08	0.03	0	0	0.22	0	0.03	0.1
chr1	C	9968203	CG	0	0	0	0	0	0	0.2	0	0	0	0	0	0	0.03	0
chr1	G	9968204	CG	0	0	0	0	0.01	0	0.02	0.13	0	0	0	0.06	0	0.07	0
chr1	C	9968210	CG	0.08	0	0	0.07	0	0	0.24	0	0	0	0	0	0	0	0
chr1	G	9968211	CG	0	0.09	0	0	0.03	0.06	0	0.06	0	0	0	0.07	0	0	0
chr1	C	9968214	CG	0	0	0	0	0	0	0	0	0.03	0	0	0	0	0.03	0.04
chr1	G	9968215	CG	0	0.02	0.03	0.02	0.01	0.06	0	0	0.02	0	0	0.07	0	0	0
chr1	C	9968237	CG	0	0	0	0	0	0	0	0	0	0	0	0.04	0	0	0
chr1	G	9968238	CG	0	0.14	0	0.12	0.12	0.16	0.1	0.19	0	0.09	0.33	0.07	0.25	0.07	0.03
chr1	C	9968243	CG	0.51	0.6	0.43	0.19	0.42	0.18	0.44	0.5	0.37	0.6	0.39	0.54	0.24	0.32	0.43
chr1	C	9968246	CG	0.02	0.07	0	0	0.01	0	0	0	0	0	0.08	0.05	0	0	0.14
chr1	C	9968266	CG	0	0	0	0	0	0	0	0	0	0	0.03	0.04	0	0	0.02
chr1	G	9968267	CG	0	0.02	0	0	0.01	0.06	0	0.01	0	0	0.03	0	0	0	0
chr1	C	9968271	CG	0	0.07	0	0.02	0.07	0	0.06	0	0.03	0	0	0	0	0	0
chr1	G	9968272	CG	0.02	0.02	0.11	0	0.04	0	0	0	0	0.02	0.05	0.13	0	0	0
chr1	C	9968275	CG	0	0.07	0	0	0.01	0.03	0	0.03	0	0	0	0	0	0	0
chr1	G	9968276	CG	0.02	0.08	0	0	0.02	0	0.03	0	0	0	0.1	0	0	0.03	0
chr1	C	9968277	CG	0	0	0	0.02	0.01	0	0	0	0.02	0	0	0	0.12	0	0
chr1	G	9968278	CG	0.02	0.04	0	0	0	0.01	0	0.01	0	0	0.05	0	0.07	0.03	0
chr1	C	9968284	CG	0.04	0.23	0	0.06	0.05	0.03	0	0	0.02	0	0	0	0.12	0.01	0
chr1	G	9968285	CG	0.02	0.1	0.17	0.02	0.03	0.03	0.13	0	0	0.02	0.03	0	0	0	0
chr1	C	9968287	CG	0.13	0.03	0	0.04	0.02	0	0	0	0	0	0	0.24	0	0	0
chr1	G	9968288	CG	0	0.14	0.03	0	0.02	0.14	0	0	0.13	0	0.05	0	0	0.03	0
chr1	G	9968313	CG	0.16	0.04	0.05	0.03	0.03	0.09	0	0.01	0.06	0	0.03	0	0	0.08	0.11
chr1	C	10008904	CG	0.1	0.11	0.1	0.11	0.16	0.14	0.08	0.1	0.05	0.11	0.19	0.15	0.14	0.1	0.06
chr1	C	10008940	CG	0.08	0.06	0.13	0.04	0.05	0.08	0.18	0.07	0.05	0.08	0.28	0.04	0.23	0	0
chr1	G	10009013	CG	0.07	0.13	0.08	0.13	0.09	0.11	0.04	0.04	0.09	0.14	0.07	0.04	0.1	0.13	0.09
chr1	G	10018327	CG	0.75	0.83	1	0.97	1	0.93	1	0.95	0.54	1	0.89	1	1	1	1
chr1	C	10037824	CG	0	0	0	0.04	0	0	0.17	0.29	0	0	0	0	0.2	0.2	0.2
chr1	C	10037836	CG	0	0.21	0	0	0	0	0	0	0.02	0.03	0	0.05	0	0	0
chr1	C	10037951	CG	0.02	0.09	0.08	0.11	0.05	0	0.11	0.01	0.14	0	0.03	0	0	0.08	0.1
chr1	G	10037952	CG	0.08	0	0	0	0	0.03	0.09	0.21	0	0	0	0	0.05	0.15	0
chr1	C	10037960	CG	0.04	0	0.04	0.02	0	0.03	0	0	0	0	0	0	0	0	0
chr1	C	10037977	CG	0.02	0.02	0	0	0	0	0.01	0	0	0	0	0	0.33	0	0
chr1	C	10037979	CG	0	0.02	0	0	0	0	0	0	0	0	0	0	0	0	0
chr1	C	10037981	CG	0	0	0	0.05	0.01	0	0	0.01	0	0	0	0	0	0	0
chr1	C	10037989	CG	0	0	0	0.02	0.02	0	0.01	0.02	0.02	0.08	0	0	0	0	0
chr1	C	10037991	CG	0	0	0	0	0.03	0	0.05	0.02	0.02	0	0	0	0	0	0
chr1	C	10037994	CG	0	0.02	0	0	0	0	0	0.02	0.01	0.04	0	0	0	0	0
chr1	C	10037997	CG	0	0	0	0.02	0.02	0	0	0	0	0.04	0	0	0	0	0
chr1	C	10038000	CG	0	0.02	0	0	0.01	0	0	0	0	0.04	0	0	0	0	0.05
chr1	G	10038037	CG	0	0	0	0	0	0.02	0	0	0	0	0	0	0	0	0
chr1	G	10038042	CG	0	0.02	0	0	0	0	0	0.01	0	0	0	0	0	0	0
chr1	G	10038047	CG	0	0	0	0	0.01	0	0	0.01	0	0	0	0	0	0	0
chr1	C	10038065	CG	0.06	0.06	0.03	0.06	0.06	0.05	0.03	0.07	0.04	0.05	0.08	0.08	0.08	0.03	0.01
chr1	G	10038066	CG	0	0.04	0.06	0	0.07	0	0	0	0	0.28	0.11	0.06	0	0.13	0
chr1	C	10038073	CG	0	0	0.01	0	0	0	0	0	0.01	0	0.01	0	0	0	0
chr1	C	10038089	CG	0	0	0	0	0	0.01	0	0.01	0.02	0.01	0.01	0.04	0	0	0
chr1	C	10038097	CG	0.02	0	0.01	0	0.01	0	0	0	0	0	0.01	0	0	0.01	0
chr1	C	10038101	CG	0	0	0.01	0	0	0	0.04	0	0	0.03	0.01	0	0	0	0
chr1	C	10038112	CG	0.01	0	0	0	0	0	0.02	0	0	0	0.01	0	0	0	0.02
chr1	G	10038113	CG	0.01	0	0	0	0.01	0	0.03	0	0	0	0.01	0	0	0.01	0
chr1	G	10038120	CG	0	0	0	0	0	0	0	0	0.01	0.01	0	0	0.02	0	0
chr1	G	10038130	CG	0	0	0	0	0	0	0	0	0	0	0	0	0	0	0.01
chr1	G	10038154	CG	0.01	0.02	0.01	0.01	0	0.01	0	0	0.04	0	0	0.01	0.03	0	0
chr1	G	10038156	CG	0.01	0.05	0.02	0	0.02	0.03	0	0	0.01	0	0.05	0	0	0	0.01
chr1	G	10038159	CG	0.02	0.04	0.05	0.12	0.04	0.07	0.13	0.04	0.09	0.01	0.06	0.1	0	0.04	0.12
chr1	C	10038356	CG	0.08	0.08	0.03	0.07	0.09	0.09	0.09	0.06	0.1	0.03	0.07	0.05	0.07	0.04	0.06
chr1	C	10038384	CG	0.02	0	0	0.01	0.02	0.01	0	0	0.02	0	0.01	0	0	0	0.01
chr1	G	10038385	CG	0	0	0	0	0	0	0	0	0.27	0	0	0.13	0	0	0
chr1	C	10038386	CG	0	0	0	0.01	0	0.01	0	0	0	0.01	0	0	0.03	0	0
chr1	G	10038387	CG	0	0	0	0	0	0	0	0	0	0	0	0	0	0	0
chr1	G	10038410	CG	0	0	0	0	0	0	0.11	0	0.08	0	0	0	0	0	0
chr1	C	10038425	CG	0.06	0.09	0.04	0.08	0.08	0.1	0.09	0.07	0.08	0.04	0.11	0.14	0.07	0.02	0.03
chr1	G	10038426	CG	0	0	0	0	0	0	0	0	0	0	0	0	0	0	0
chr1	C	10038441	CG	0	0	0.01	0	0.01	0	0	0.01	0.01	0	0.01	0.01	0	0	0.02
chr1	C	10038446	CG	0.01	0.02	0.02	0.02	0	0.01	0	0.01	0.01	0	0.01	0.01	0	0.01	0
chr1	G	10038447	CG	0	0.01	0.01	0	0.01	0	0.01	0.01	0.01	0	0	0	0	0	0.02
chr1	C	10038460	CG	0	0	0.01	0	0.01	0.02	0.01	0.01	0.01	0.01	0.01	0.01	0	0	0.01
chr1	G	10038461	CG	0.01	0.01	0	0	0	0.01	0	0.02	0	0.01	0	0	0.01	0	0.01
chr1	C	10038471	CG	0	0	0	0.01	0	0	0.01	0.01	0.01	0	0.02	0	0	0	0
chr1	G	10038472	CG	0	0.01	0.01	0	0.01	0.01	0.01	0.01	0	0	0	0.01	0	0	0.02
chr1	G	10038494	CG	0.1	0.06	0.07	0.08	0.05	0.07	0.05	0.08	0.05	0.06	0.07	0.1	0.03	0.09	0.04
chr1	C	10040003	CG	0.08	0.05	0.07	0.13	0.1	0.06	0.06	0.1	0.07	0.07	0.09	0.05	0.05	0.09	0.04
chr1	C	10040031	CG	0	0	0.01	0.01	0	0.01	0	0	0	0	0	0	0.02	0.02	0.02
chr1	G	10040032	CG	0	0	0	0.01	0	0	0.01	0	0.01	0.01	0.01	0	0	0	0.01
chr1	C	10040033	CG	0.03	0.01	0.02	0.02	0.02	0.01	0.01	0	0.02	0.02	0	0.02	0	0.02	0.01
chr1	G	10040034	CG	0	0	0	0	0	0.02	0	0.01	0	0	0	0	0.03	0.03	0.01
chr1	C	10040038	CG	0	0.01	0.01	0.01	0.01	0.01	0	0.01	0.01	0.01	0	0.02	0.01	0.01	0.01
chr1	G	10040039	CG	0	0	0.01	0.01	0.01	0.01	0	0.01	0	0	0	0.01	0.01	0	0
chr1	C	10040040	CG	0	0.02	0.01	0.01	0.01	0	0	0	0	0	0	0	0	0	0.01
chr1	G	10040041	CG	0.01	0.01	0.02	0	0	0	0	0	0	0.01	0	0.01	0.01	0	0
chr1	C	10040045	CG	0	0.01	0	0.01	0	0	0	0.01	0	0	0	0.01	0	0	0.02
chr1	G	10040046	CG	0.01	0	0.01	0.01	0.01	0	0.01	0	0	0.01	0	0.01	0.04	0	0
chr1	G	10040054	CG	0.04	0.13	0.07	0.06	0.06	0.05	0.08	0.03	0.03	0.13	0.07	0.13	0.04	0.06	0.07
chr1	C	10040086	CG	0.02	0.01	0.16	0.01	0.11	0.07	0.09	0.07	0.01	0	0.01	0.15	0	0.07	0.03
chr1	G	10040087	CG	0.01	0.03	0.04	0.01	0.02	0.02	0	0.03	0	0	0	0.02	0.07	0	0
chr1	C	10040097	CG	0.01	0	0.04	0.01	0.01	0	0	0	0	0	0	0.04	0.1	0.02	0
chr1	G	10040098	CG	0	0	0.02	0	0.01	0	0.02	0	0.01	0	0.05	0	0	0	0
chr1	C	10040109	CG	0	0	0	0	0.02	0.01	0.01	0.02	0	0	0	0	0	0	0
chr1	G	10040110	CG	0	0.01	0.01	0.01	0	0	0.01	0	0.01	0	0	0	0	0	0
chr1	C	10040111	CG	0	0	0	0.01	0.01	0.04	0.01	0	0.03	0	0	0	0	0	0
chr1	G	10040112	CG	0.05	0.02	0.01	0	0	0	0	0.02	0	0	0	0.01	0	0	0
chr1	C	10040113	CG	0.02	0.01	0	0.05	0.01	0	0.01	0.03	0.01	0.01	0	0	0	0	0
chr1	G	10040114	CG	0.01	0	0	0	0.01	0	0	0	0	0.04	0	0	0	0	0.01
chr1	C	10040126	CG	0	0.04	0.09	0.01	0.03	0.03	0	0	0.01	0.02	0.02	0.08	0.02	0	0.03
chr1	G	10040127	CG	0.09	0.1	0.14	0.06	0.09	0.04	0.12	0.08	0.02	0.02	0.11	0	0.1	0	0
chr1	C	10040225	CG	0.04	0.05	0	0.08	0.11	0.1	0	0	0	0.17	0.08	0	0	0	0
chr1	G	10141436	CG	1	1	0.92	1	1	1	1	1	0.94	1	1	1	0.89	1	1
chr1	C	10156764	CG	1	1	1	0.91	0.94	0.88	0.88	0.75	1	1	1	1	1	1	1
chr1	G	10156868	CG	0.87	0.88	0.93	0.68	0.91	1	0.94	0.9	0.9	0.75	0.85	0.83	0.75	1	1
chr1	G	10156904	CG	1	0.86	1	0.76	0.86	1	0.94	1	0.89	0.93	0.92	1	0.67	1	1
chr1	C	10232239	CG	0.03	0.11	0.03	0.08	0.04	0.05	0.12	0.06	0.06	0.02	0.06	0	0.07	0.06	0.02
chr1	C	10232247	CG	0.02	0.01	0	0.02	0	0	0	0.01	0	0	0.01	0	0	0	0.02
chr1	C	10232249	CG	0	0	0.01	0.01	0.01	0	0	0.01	0.01	0	0	0	0.02	0	0.01
chr1	C	10232257	CG	0	0.01	0.01	0	0	0.01	0	0	0.01	0.03	0	0	0	0	0
chr1	G	10232258	CG	0.01	0	0	0	0	0.01	0.01	0	0	0	0.01	0	0	0.01	0
chr1	C	10232278	CG	0	0.03	0	0.01	0	0	0	0	0	0.05	0	0	0	0.02	0
chr1	G	10232279	CG	0	0	0	0.01	0.01	0.03	0.04	0	0	0.03	0	0	0	0.01	0.01
chr1	C	10232282	CG	0	0.01	0	0.02	0.01	0	0.01	0.01	0.01	0	0.03	0	0	0	0
chr1	G	10232283	CG	0	0.01	0.01	0	0.03	0.03	0	0.01	0.01	0.02	0.01	0	0.13	0.01	0
chr1	C	10232299	CG	0.12	0	0.11	0.06	0.09	0	0.09	0.35	0.1	0.08	0	0	0.06	0.1	0
chr1	G	10232300	CG	0.04	0.07	0.04	0.05	0.07	0.04	0.02	0.06	0.07	0.14	0.04	0.04	0.1	0.05	0.05
chr1	C	10232303	CG	0	0	0	0	0	0	0	0	0	0	0	0	0	0	0
chr1	G	10232304	CG	0	0	0	0	0	0	0	0	0	0	0	0	0	0.04	0
chr1	C	10232308	CG	0	0	0	0	0	0	0	0	0	0	0	0	0	0	0
chr1	G	10232309	CG	0	0	0	0	0	0	0	0.03	0	0	0.06	0.03	0	0	0
chr1	C	10232312	CG	0	0	0	0	0.01	0	0	0	0	0	0	0	0	0	0
chr1	G	10232313	CG	0	0	0	0	0.05	0	0	0.03	0.03	0	0	0	0	0	0
chr1	C	10232317	CG	0	0.03	0	0	0	0	0.05	0	0	0.03	0	0	0	0	0
chr1	C	10232320	CG	0	0.03	0	0.19	0	0	0	0	0	0	0	0	0.06	0	0.14
chr1	G	10232321	CG	0	0	0	0	0.04	0	0	0	0	0	0	0	0	0	0
chr1	C	10232331	CG	0.06	0.05	0	0	0	0	0	0	0	0	0	0	0	0	0
chr1	G	10232332	CG	0	0	0.04	0	0.01	0	0	0	0	0	0	0	0	0	0
chr1	C	10232333	CG	0	0.03	0.03	0.03	0.01	0	0	0	0	0.03	0	0	0	0	0
chr1	G	10232334	CG	0	0	0	0	0.03	0	0	0	0	0	0	0	0	0	0
chr1	C	10232337	CG	0.11	0.03	0.06	0.03	0.02	0	0.05	0	0.04	0.07	0	0	0	0	0
chr1	G	10232338	CG	0	0.19	0.03	0.12	0.08	0.13	0	0	0.03	0.09	0	0.05	0.14	0.21	0.04
chr1	C	10232362	CG	0.05	0.04	0.08	0.06	0.06	0.04	0.02	0.04	0.07	0.02	0.03	0.1	0.11	0.04	0.05
chr1	C	10232383	CG	0	0	0.02	0.01	0.01	0	0	0	0.01	0.04	0.01	0	0	0.01	0
chr1	C	10232387	CG	0	0	0	0	0	0.01	0	0	0	0.03	0	0.06	0	0.03	0.02
chr1	C	10232394	CG	0	0	0.01	0.01	0	0.01	0	0	0	0.01	0	0	0	0.01	0
chr1	C	10232411	CG	0	0	0.01	0	0	0	0	0.01	0	0	0	0	0	0.03	0
chr1	G	10232412	CG	0	0	0.01	0.01	0.01	0.01	0.01	0.01	0.01	0	0	0.01	0	0.01	0
chr1	G	10232432	CG	0.01	0	0.01	0	0.01	0	0	0.01	0.01	0	0	0	0	0	0
chr1	C	10232454	CG	0.1	0.08	0.05	0.08	0.06	0.02	0.01	0.05	0.07	0.02	0.07	0.03	0.02	0.03	0.03
chr1	G	10232455	CG	0.03	0.06	0.03	0.07	0.07	0.04	0.06	0.06	0.09	0.02	0.07	0.02	0.01	0.04	0.07
chr1	C	10232474	CG	0.02	0.01	0	0	0	0.01	0.01	0.01	0	0	0	0	0.02	0.02	0
chr1	C	10232498	CG	0.03	0	0	0	0	0	0	0.02	0.02	0.02	0	0	0.05	0.01	0
chr1	G	10232499	CG	0.01	0	0	0.01	0.01	0	0	0	0	0	0	0	0	0.03	0.02
chr1	C	10232500	CG	0.02	0	0.01	0	0.01	0.01	0	0	0.02	0.02	0.01	0	0	0.02	0.03
chr1	G	10232501	CG	0.01	0.01	0.02	0.02	0.01	0.04	0	0.01	0	0.02	0	0	0.01	0.01	0.02
chr1	G	10232510	CG	0	0.01	0	0.01	0	0.01	0.01	0.03	0.01	0.02	0.02	0.05	0	0	0.02
chr1	G	10232513	CG	0.02	0	0	0	0.01	0	0	0	0.03	0	0	0	0	0.01	0.05
chr1	G	10232516	CG	0.02	0.02	0	0.01	0.01	0.01	0	0	0	0	0	0.05	0.01	0	0.03
chr1	G	10232519	CG	0.02	0.02	0	0.01	0.01	0.01	0.03	0	0.01	0	0.04	0.06	0	0.01	0
chr1	G	10232522	CG	0.02	0	0.01	0	0.01	0	0	0.02	0.01	0	0	0	0	0	0
chr1	G	10232528	CG	0.04	0.11	0.07	0.05	0.07	0.06	0.03	0.11	0.09	0.03	0.11	0.03	0.12	0.02	0.02
chr1	C	10232565	CG	0.03	0.06	0.06	0.1	0.05	0.16	0.13	0.08	0.04	0.11	0.1	0.07	0.13	0.1	0.11
chr1	C	10232576	CG	0.03	0.05	0.03	0.05	0.05	0.06	0.02	0.03	0.01	0.04	0.01	0.07	0.03	0.01	0.02
chr1	C	10232592	CG	0.04	0.01	0	0.02	0	0.01	0.01	0.01	0.03	0.01	0.03	0.02	0	0	0
chr1	C	10232603	CG	0.01	0.01	0	0.01	0.01	0	0.02	0	0.01	0.01	0.01	0.02	0.02	0	0
chr1	G	10232604	CG	0	0.03	0	0	0.02	0	0	0	0	0.11	0.08	0.05	0	0	0.03
chr1	C	10232612	CG	0	0.01	0	0.02	0.02	0.03	0.01	0.01	0.04	0	0	0.04	0.02	0	0.03
chr1	G	10232613	CG	0	0	0.05	0	0	0	0	0	0	0	0	0	0.08	0	0
chr1	G	10232621	CG	0	0	0.02	0	0.01	0	0	0	0	0	0	0	0	0	0
chr1	G	10232633	CG	0	0	0	0	0.01	0	0	0.02	0.01	0	0	0	0	0	0
chr1	G	10232636	CG	0	0	0	0.04	0	0	0.01	0.02	0	0	0	0	0	0	0
chr1	G	10232649	CG	0.03	0.02	0	0.04	0.01	0	0.03	0.02	0.02	0.02	0	0	0	0	0
chr1	C	10232652	CG	0	0.08	0.04	0.09	0.07	0.1	0	0.03	0.02	0	0.02	0	0	0.08	0.03
chr1	G	10232653	CG	0.03	0	0	0.04	0.04	0	0.13	0.08	0.08	0.06	0	0.2	0	0.03	0.17
chr1	C	10232655	CG	0	0	0	0	0.02	0	0.02	0	0.01	0.02	0	0	0	0	0
chr1	C	10232658	CG	0	0	0	0	0	0	0	0.01	0	0	0.04	0	0	0	0
chr1	C	10232660	CG	0	0	0	0	0.02	0.12	0	0	0	0	0	0.04	0	0	0
chr1	C	10232665	CG	0.09	0	0	0.07	0.01	0	0	0	0	0	0	0	0	0	0
chr1	C	10232669	CG	0	0.02	0	0	0	0	0	0	0.01	0	0	0	0.09	0	0
chr1	C	10232671	CG	0	0	0	0.07	0.01	0	0.02	0	0	0.04	0	0	0	0	0
chr1	C	10232677	CG	0	0.02	0	0	0.01	0	0	0.01	0	0	0.02	0	0	0	0.03
chr1	C	10232686	CG	0	0	0.02	0.02	0.02	0	0	0.01	0	0	0	0.14	0	0	0
chr1	C	10232689	CG	0	0.02	0	0.02	0.01	0.02	0	0	0	0.02	0	0	0	0	0.03
chr1	C	10232698	CG	0	0	0	0	0.01	0	0	0	0	0	0	0	0	0	0
chr1	G	10232699	CG	0.02	0	0	0	0	0	0	0.01	0.01	0	0	0	0	0	0
chr1	G	10232704	CG	0	0	0.02	0.03	0	0.01	0	0.01	0	0	0	0	0.07	0	0
chr1	G	10232708	CG	0	0.02	0	0	0.01	0.01	0	0.02	0.03	0.05	0.11	0	0	0	0
chr1	G	10232716	CG	0	0	0	0	0.01	0	0	0.01	0.01	0	0	0	0	0.02	0.02
chr1	G	10232719	CG	0.02	0	0	0	0.02	0	0	0	0	0	0	0	0	0.09	0
chr1	G	10232723	CG	0	0.02	0	0.03	0.01	0	0	0.01	0	0	0	0	0	0	0
chr1	G	10232730	CG	0	0	0.02	0	0	0	0	0.01	0	0	0.02	0.02	0	0	0
chr1	G	10232732	CG	0	0	0	0.01	0.01	0	0	0	0	0	0	0	0	0	0.02
chr1	G	10232736	CG	0	0	0.02	0.03	0.01	0	0	0	0	0	0	0	0	0	0
chr1	G	10232740	CG	0.08	0.05	0.02	0.03	0.11	0.15	0.09	0.12	0.01	0.06	0	0.17	0.07	0.11	0.02
chr1	G	10232921	CG	0	0	0	0	0	0	0	0	0	0	0	0	0	0	0
chr1	G	10232924	CG	0	0	0	0	0	0	0	0	0.11	0	0	0	0	0	0
chr1	G	10232930	CG	0	0	0	0	0.03	0	0	0	0	0	0	0	0	0	0
chr1	G	10232933	CG	0	0	0	0	0	0	0	0	0	0	0	0	0	0	0
chr1	G	10232950	CG	0	0	0	0	0.03	0	0	0	0	0	0	0.14	0	0	0
chr1	G	10232953	CG	0	0	0	0	0	0	0	0	0	0	0	0	0	0	0
chr1	G	10232963	CG	0.09	0	0.05	0.07	0.1	0	0	0	0	0	0	0	0	0	0
chr1	C	10233280	CG	0.02	0.08	0.05	0.04	0.07	0.14	0.12	0.08	0.1	0.05	0.05	0.07	0.12	0.06	0.01
chr1	C	10233285	CG	0	0	0.01	0	0	0	0	0	0.01	0	0	0	0	0	0
chr1	C	10233304	CG	0.05	0	0	0	0.01	0	0	0.02	0.03	0	0	0	0	0.02	0
chr1	G	10233305	CG	0.01	0.01	0	0	0.01	0	0	0	0.01	0.03	0.01	0	0	0	0
chr1	C	10233310	CG	0.01	0	0	0	0.01	0	0.02	0.01	0	0.01	0	0.01	0	0.01	0.02
chr1	G	10233311	CG	0.01	0.01	0	0.01	0	0	0	0	0.01	0.02	0.05	0.01	0	0.02	0
chr1	G	10233337	CG	0.06	0.07	0.05	0.02	0.08	0.12	0.06	0.08	0.04	0.06	0.15	0.08	0.04	0.03	0.04
chr1	C	10233690	CG	0	0.04	0.06	0.05	0.04	0.05	0.07	0.12	0.05	0.06	0.03	0.1	0.2	0	0
chr1	G	10233796	CG	0	0	0	0	0.02	0.02	0	0	0	0.19	0	0.01	0	0	0
chr1	G	10233825	CG	0	0.44	0.06	0.08	0.05	0.08	0.06	0.12	0.04	0	0	0.06	0	0	0
chr1	C	10233851	CG	0	0	0	0	0	0	0.14	0	0.21	0	0.13	0	0	0	0
chr1	C	10249779	CG	0.94	0.96	0.94	0.92	0.93	0.93	0.89	0.9	0.91	0.97	0.97	0.92	0.95	0.9	0.94
chr1	C	10249815	CG	0.74	0.78	0.78	0.76	0.81	0.75	0.69	0.8	0.71	0.68	0.71	0.73	0.86	0.83	0.79
chr1	G	10249816	CG	0.93	0.86	0.81	0.84	0.72	0.87	0.91	0.83	0.84	0.91	0.74	0.91	0.81	0.8	0.84
chr1	G	10249864	CG	0.99	0.93	0.96	0.97	0.9	1	0.98	0.97	0.92	0.99	0.98	1	0.98	0.97	0.92
chr1	C	10255625	CG	0.68	0.47	0.83	0.73	0.62	0.77	0.67	0.68	0.82	0.82	0.6	0.67	1	0.86	0.74
chr1	G	10255703	CG	0.34	0.57	0.64	0.42	0.68	0.59	0.57	0.61	0.59	0.77	0.69	0.59	0.7	0.59	0.95
chr1	C	10262611	CG	0.84	0.73	0.8	0.78	0.8	0.81	0.81	0.79	0.81	0.78	0.82	0.7	0.88	0.71	0.83
chr1	G	10294827	CG	0.87	0.89	0.93	0.92	0.94	0.96	0.89	0.9	0.9	0.97	0.88	0.94	0.91	0.92	0.89
chr1	G	10294884	CG	1	1	1	0.96	0.95	1	1	1	0.92	1	0.72	0.89	1	0.96	1
chr1	G	10294890	CG	1	0.94	1	0.88	0.95	0.96	0.86	1	0.89	0.97	0.95	0.89	1	0.96	1
chr1	G	10294907	CG	1	1	0.97	0.92	0.92	0.72	1	0.94	0.89	0.89	0.97	0.96	0.86	1	0.77
chr1	G	10294927	CG	0.89	0.9	0.73	0.95	0.9	1	0.95	0.8	0.86	0.92	1	1	0.63	0.91	0.92
chr1	C	10304415	CG	0.78	0.93	0.4	0.56	0.79	0.62	0.77	0.83	0.68	0.77	0.95	1	1	0.71	0.5
chr1	G	10304532	CG	0.97	1	0.9	0.99	0.96	0.96	0.91	0.78	0.89	0.94	0.99	0.99	1	0.88	1
chr1	C	10382660	CG	0.81	0.89	0.93	0.97	0.83	0.9	0.87	0.96	0.87	0.87	0.82	0.96	0.83	0.94	0.96
chr1	C	10382679	CG	0.91	0.78	0.96	0.91	0.87	0.96	0.83	0.95	0.82	0.82	1	0.55	1	0.89	0.9
chr1	C	10382684	CG	1	0.91	0.96	1	0.94	0.96	1	1	1	1	1	1	1	1	0.97
chr1	C	10382686	CG	0.84	0.95	0.96	0.88	0.83	0.83	0.84	0.88	0.88	0.97	1	1	1	1	0.86
chr1	G	10382797	CG	0.99	0.94	0.93	0.95	0.98	0.99	0.97	0.94	0.98	0.9	0.9	0.98	1	0.92	0.97
chr1	G	10382809	CG	0.94	0.95	0.99	0.98	0.97	0.99	0.93	0.99	0.97	0.99	0.93	1	1	1	1
chr1	G	10382858	CG	0.26	0.35	0.16	0.58	0.24	0.44	0.21	0.43	0.2	0.22	0.15	0.12	0.09	0.25	0.38
chr1	G	10382881	CG	0.87	0.82	0.7	0.39	0.61	0.7	0.68	0.55	0.86	0.82	0.6	0.47	0.67	0.67	0.92
chr1	G	10382906	CG	1	0.76	1	0.86	1	0.96	0.95	0.83	0.82	0.93	0.98	0.91	1	0.89	1
chr1	C	10534952	CG	0.94	0.96	0.96	0.95	0.95	0.95	0.76	0.92	0.89	0.96	0.88	0.97	0.93	0.96	0.96
chr1	C	10534959	CG	0.86	0.79	0.93	0.77	0.81	0.93	0.91	0.92	0.76	0.89	0.81	0.92	0.88	0.94	0.95
chr1	G	10534960	CG	0.5	0.88	0.8	0.64	0.7	0.85	0.79	0.73	0.81	0.81	0.73	0.89	0.61	0.56	0.67
chr1	C	10534997	CG	0.02	0.04	0.02	0.02	0.07	0	0	0.04	0.05	0.05	0.11	0	0.04	0.04	0
chr1	G	10534998	CG	1	0.96	0.77	1	0.9	0.94	0.89	0.92	0.9	1	0.86	1	1	0.89	0.92
chr1	G	10535197	CG	0.91	1	0.85	0.94	0.97	1	0.29	0.85	0.55	0.89	0.64	0.92	0.95	0.88	1
chr1	C	10543482	CG	0.97	0.98	0.97	0.96	0.98	0.98	0.97	0.99	0.99	0.96	0.99	1	0.94	0.97	0.98
chr1	C	10543493	CG	1	0.95	0.9	0.98	1	0.98	0.96	0.96	0.99	0.96	0.99	0.99	1	0.98	0.98
chr1	C	10543495	CG	0.99	0.98	0.98	0.95	0.97	0.93	1	0.99	1	0.99	1	0.97	1	0.95	0.98
chr1	C	10544916	CG	1	0.83	0.92	0.7	1	0.95	0.94	1	1	0.97	1	0.9	1	0.73	0.87
chr1	C	10544957	CG	1	1	1	0.82	0.95	1	1	1	0.96	1	1	1	1	1	0.9
chr1	C	10544965	CG	0	0	0	0	0	0.05	0	0	0	0	0.13	0	0	0	0
chr1	C	10630509	CG	0.97	0.91	0.91	0.94	0.91	0.99	0.89	0.89	0.93	0.86	0.89	0.98	1	0.88	0.77
chr1	C	10630524	CG	0.92	0.85	0.93	0.83	0.93	0.95	0.95	0.88	0.94	0.78	0.96	0.78	0.93	0.97	0.79
chr1	C	10630530	CG	0.99	0.97	0.95	0.88	0.9	0.95	0.88	0.93	0.91	0.96	0.86	0.96	0.97	0.96	0.85
chr1	C	10630554	CG	0.97	0.92	0.94	0.94	0.97	0.94	0.97	0.94	0.95	0.99	0.98	0.97	1	0.96	0.91
chr1	G	10630555	CG	0.98	0.95	0.95	0.97	0.96	0.98	1	0.89	0.97	0.97	0.96	0.99	0.91	0.95	0.97
chr1	C	10630557	CG	0.99	0.95	0.93	0.91	0.94	0.92	0.98	0.93	0.93	0.97	0.96	0.97	0.98	0.98	0.88
chr1	G	10630558	CG	0.97	0.97	0.93	0.96	0.92	0.94	0.9	0.97	0.96	0.92	0.95	0.98	0.93	0.9	0.91
chr1	G	10630568	CG	0.89	0.9	0.94	0.82	0.84	0.92	0.94	0.89	0.92	0.85	0.86	0.8	0.71	0.92	0.84
chr1	G	10630588	CG	0.85	0.79	0.75	0.82	0.84	0.87	0.9	0.81	0.86	0.74	0.89	0.76	0.93	0.8	0.8
chr1	C	10656326	CG	0.62	0.62	0.78	0.67	0.72	0.91	0.95	0.76	0.95	0.84	0.42	0.73	1	0.38	0.61
chr1	C	10656344	CG	0.72	0.83	0.84	0.95	0.81	0.91	0.97	0.88	0.88	0.99	1	0.86	1	0.62	0.65
chr1	C	10656354	CG	0.9	0.68	0.71	0.71	0.66	0.87	0.69	0.84	0.81	0.94	0.81	0.68	0.69	0.67	0.48
chr1	G	10656442	CG	0.55	0.78	0.76	0.68	0.76	0.95	0.43	0.85	0.38	0.62	0.45	0.63	0.87	0.33	0.53
chr1	C	10696029	CG	0.66	0.5	0.45	0.48	0.55	0.48	0.47	0.5	0.46	0.53	0.52	0.24	0.7	0.51	0.75
chr1	G	10696142	CG	0.8	0.68	0.86	0.78	0.8	0.97	0.81	0.82	0.85	1	0.83	1	0.91	0.89	0.68
chr1	C	10880372	CG	0.92	1	0.82	0.67	0.63	0.67	0.9	0.5	0.75	0.52	0.72	1	0.17	1	0.78
chr1	C	10888594	CG	0.95	0.97	1	0.97	0.99	0.99	0.95	0.95	0.96	0.96	0.95	0.99	1	0.98	0.93
chr1	C	10888617	CG	0.95	0.92	0.84	0.9	0.93	0.94	0.95	0.96	0.97	0.94	0.92	0.99	0.96	0.92	0.93
chr1	G	10888618	CG	0.96	0.9	0.96	0.92	0.86	0.92	0.92	0.87	0.89	0.95	0.93	0.84	0.78	0.96	0.9
chr1	C	10888626	CG	0.97	0.97	0.95	0.93	0.97	0.97	0.93	0.99	0.98	1	0.96	0.93	0.99	0.96	0.98
chr1	G	10888627	CG	0.89	0.97	0.94	0.99	0.96	0.93	0.95	0.96	0.99	0.96	0.98	0.99	0.87	0.99	0.98
chr1	G	10888657	CG	0.91	0.96	0.98	0.95	0.95	0.98	0.95	0.98	0.91	0.98	0.87	0.94	0.83	1	0.89
chr1	G	10970727	CG	1	0.93	1	0.96	0.93	1	1	0.98	0.95	1	1	0.96	1	0.97	1
chr1	G	10970741	CG	1	0.98	1	1	0.96	0.94	0.94	0.96	0.95	1	1	0.95	1	1	0.92
chr1	G	10970761	CG	0.89	0.91	0.98	1	0.95	0.97	0.94	0.96	0.97	1	1	1	1	1	1
chr1	G	10970766	CG	0.92	0.96	0.98	0.96	0.97	0.89	0.82	1	0.94	1	0.78	0.96	1	1	1
chr1	G	10970776	CG	0.97	0.98	0.96	0.86	0.95	0.94	0.94	0.82	0.89	0.94	1	0.96	0.95	1	1
chr1	C	10993566	CG	0.08	0.08	0.03	0.02	0.13	0.04	0.1	0.04	0.03	0.03	0.1	0	0.06	0.11	0.06
chr1	C	10993578	CG	0.02	0	0	0	0	0	0.02	0.02	0.01	0.01	0	0	0.09	0	0
chr1	C	10993592	CG	0.01	0.03	0	0	0	0	0.01	0	0	0	0.01	0.01	0.11	0.01	0.01
chr1	C	10993594	CG	0.02	0	0.03	0	0	0.01	0.01	0	0	0	0.02	0	0.05	0	0.01
chr1	C	10993599	CG	0.01	0	0	0	0	0.03	0.01	0	0.01	0	0.01	0.01	0.05	0	0.01
chr1	C	10993601	CG	0.01	0.01	0.01	0	0.01	0.01	0.04	0.01	0.01	0	0.02	0.02	0.05	0	0
chr1	C	10993603	CG	0	0.01	0.01	0.02	0	0	0	0.01	0	0	0.01	0	0.07	0	0
chr1	G	10993604	CG	0.01	0	0.01	0.02	0.01	0	0	0	0.01	0	0.06	0.01	0	0	0.01
chr1	C	10993608	CG	0.02	0.01	0.01	0.01	0.01	0.01	0.01	0.01	0.01	0	0.03	0	0.05	0	0
chr1	G	10993609	CG	0.02	0.02	0.01	0.01	0	0.01	0.01	0.01	0	0.01	0.03	0.01	0	0.02	0
chr1	C	10993610	CG	0	0	0.03	0	0	0	0	0.01	0.01	0	0	0	0.1	0	0.01
chr1	G	10993611	CG	0.03	0.04	0	0	0.02	0.03	0	0.01	0.01	0	0.04	0	0	0.01	0
chr1	C	10993614	CG	0.02	0.01	0.01	0.02	0	0	0.01	0.04	0.01	0	0.06	0	0.05	0.01	0
chr1	G	10993615	CG	0	0	0	0.01	0.01	0	0.01	0	0	0.01	0.04	0.01	0	0	0
chr1	G	10993620	CG	0.01	0.01	0.04	0	0	0.01	0.01	0.01	0.01	0	0.04	0	0	0	0
chr1	G	10993627	CG	0.02	0.01	0	0.01	0.01	0.01	0.01	0	0.01	0	0.02	0	0	0	0.01
chr1	G	10993652	CG	0.09	0.1	0.06	0.05	0.07	0.1	0.02	0.11	0.04	0.03	0.09	0.11	0.04	0.02	0.08
chr1	C	10993684	CG	0.17	0	0.11	0	0.08	0.09	0.05	0.14	0.02	0	0	0	0	0.1	0
chr1	C	10993695	CG	0	0.03	0	0	0	0	0	0.03	0	0	0.13	0	0	0	0
chr1	C	10993704	CG	0	0.03	0	0	0	0	0.02	0	0	0	0	0	0	0	0
chr1	C	10993719	CG	0	0	0	0.04	0	0	0	0.03	0.09	0.07	0	0	0	0	0
chr1	C	10993728	CG	0	0	0	0	0.01	0	0	0	0	0	0	0	0	0	0
chr1	G	10993738	CG	0.05	0	0.04	0	0.02	0.04	0	0	0	0	0.14	0	0	0	0
chr1	G	10993748	CG	0.07	0	0	0	0.02	0	0	0.03	0	0	0.17	0.04	0	0	0
chr1	G	10993750	CG	0.07	0.02	0	0	0	0.04	0.14	0.21	0.22	0.18	0.43	0.11	0	0	0
chr1	G	10993758	CG	0	0	0	0	0	0	0	0.03	0	0	0.25	0	0	0	0
chr1	G	10993776	CG	0	0	0	0.02	0.02	0	0	0	0.03	0.02	0.05	0	0	0	0
chr1	G	10993778	CG	0	0	0	0	0	0	0	0	0	0	0	0	0	0.05	0
chr1	G	10993783	CG	0	0	0	0	0	0	0	0.04	0	0	0	0	0	0	0.05
chr1	G	10993786	CG	0	0	0.19	0	0.06	0.23	0.09	0.04	0.03	0.02	0	0	0	0.12	0.05
chr1	C	10993919	CG	0.17	0.02	0.1	0.11	0.07	0.1	0.01	0.06	0.01	0.08	0.08	0	0	0.03	0.02
chr1	G	10993920	CG	0.02	0.03	0	0	0.04	0.02	0.08	0.05	0	0.02	0.06	0	0	0.03	0
chr1	C	10993925	CG	0	0.02	0.05	0	0	0.02	0	0	0.02	0	0	0	0	0	0.01
chr1	G	10993926	CG	0.02	0	0	0	0.03	0	0	0	0.01	0.03	0.1	0	0	0	0
chr1	C	10993927	CG	0	0.01	0	0	0.03	0	0	0.02	0	0	0	0	0	0	0
chr1	G	10993928	CG	0	0	0.03	0	0.03	0	0	0.01	0	0	0.11	0.12	0	0.05	0
chr1	C	10993931	CG	0	0	0	0.06	0	0	0	0	0.01	0.01	0	0	0	0.01	0.02
chr1	G	10993932	CG	0	0.04	0	0	0	0	0	0.02	0	0	0.12	0.02	0	0	0.05
chr1	C	10993957	CG	0.03	0	0	0	0.03	0	0.03	0.02	0.01	0.02	0	0	0	0.01	0.05
chr1	G	10993958	CG	0.02	0	0.07	0.02	0.01	0	0	0	0.03	0	0.05	0	0.04	0.04	0
chr1	C	10993967	CG	0.03	0	0	0.01	0.02	0.02	0.05	0	0.01	0	0	0	0	0.03	0
chr1	G	10993968	CG	0.08	0.04	0.21	0.05	0.06	0	0.02	0.05	0.06	0.09	0.08	0.02	0.07	0.04	0.09
chr1	C	11023393	CG	0.93	0.9	0.76	0.85	0.85	0.9	0.78	0.88	0.83	0.85	0.82	1	0.96	0.79	0.98
chr1	G	11023466	CG	0.78	0.84	0.87	0.9	0.89	0.79	0.64	0.85	0.86	0.82	0.79	0.83	0.89	0.81	0.76
chr1	G	11189991	CG	0.94	0.95	0.94	0.96	0.99	0.94	1	0.91	0.92	0.94	0.9	0.87	0.95	0.92	0.98
chr1	G	11190033	CG	0.98	0.95	0.93	0.98	0.97	0.96	1	0.95	0.96	0.98	0.95	0.93	1	0.98	0.97
chr1	C	11304966	CG	1	0.99	0.96	0.85	0.96	0.96	0.97	0.97	1	0.9	0.85	1	0.75	0.93	0.86
chr1	C	11304979	CG	0.91	0.92	0.87	0.89	0.96	0.98	0.99	0.96	0.85	0.93	0.79	0.94	0.82	0.95	0.78
chr1	G	11305052	CG	0.92	0.8	0.87	0.88	0.84	0.86	0.83	0.88	0.86	0.86	0.76	0.89	0.88	0.91	0.96
chr1	G	11305071	CG	0.91	0.97	0.98	0.94	0.92	0.94	0.96	0.92	0.95	0.92	0.84	0.97	0.89	0.96	0.83
chr1	C	11325386	CG	0.93	0.95	0.99	0.96	0.84	0.98	0.98	0.95	0.97	0.88	0.96	0.99	0.97	0.96	0.99
chr1	G	11325444	CG	0.95	0.98	0.97	0.94	0.96	0.97	1	0.96	0.98	0.98	0.96	0.91	0.99	0.98	1
chr1	C	11329483	CG	0.09	0	0	0.09	0.08	0.1	0.07	0.11	0.16	0.03	0	0.15	0.12	0.22	0.06
chr1	C	11329603	CG	0.04	0.04	0.07	0.08	0.12	0.14	0	0.19	0.08	0.04	0.12	0.11	0.12	0.15	0.07
chr1	C	11329652	CG	0	0	0	0	0	0	0	0	0	0	0	0	0	0	0
chr1	G	11369820	CG	1	0.89	0.93	0.86	0.97	1	0.94	0.96	0.96	1	0.95	0.95	1	0.94	1
chr1	G	11369826	CG	1	0.89	0.8	1	0.87	0.95	0.81	0.92	0.86	0.94	0.9	1	1	0.81	0.94
chr1	G	11369828	CG	1	1	0.8	1	0.93	0.95	0.94	0.8	0.95	0.88	0.7	1	1	0.88	0.88
chr1	G	11369832	CG	1	1	0.93	0.92	0.97	1	0.88	1	0.95	0.94	1	0.89	1	1	0.94
chr1	C	11378482	CG	0.99	0.99	0.96	0.99	0.98	0.97	0.99	0.95	0.97	0.99	0.92	0.99	0.92	0.99	0.98
chr1	G	11378535	CG	0.94	0.99	0.91	0.95	0.98	0.96	0.96	0.95	0.91	0.97	0.98	0.98	0.93	0.95	0.98
chr1	C	11378565	CG	0.94	1	0.99	0.95	0.93	0.91	0.98	0.99	0.97	0.99	0.86	1	1	0.88	1
chr1	G	11378566	CG	0.97	0.99	0.97	0.99	0.97	0.98	0.99	0.96	0.96	0.97	0.92	0.98	0.99	0.99	0.98
chr1	C	11378580	CG	0.97	0.91	0.94	0.95	0.94	0.98	0.98	0.93	0.93	1	0.85	0.97	0.86	0.88	0.78
chr1	G	11378660	CG	0.97	0.98	0.92	0.96	0.95	0.98	0.98	0.97	0.96	0.95	1	0.96	1	1	0.81
chr1	G	11378671	CG	0.96	0.98	0.99	0.98	0.99	1	0.96	0.99	0.89	0.99	1	0.95	1	1	1
chr1	G	11378675	CG	0.92	0.96	0.96	0.91	0.94	0.93	0.96	0.92	0.99	0.92	0.97	1	1	0.97	0.95
chr1	G	11378682	CG	0.98	0.98	0.98	0.99	0.98	1	0.95	0.99	0.98	0.94	1	0.99	1	0.98	1
chr1	C	11413788	CG	0	0.02	0	0.15	0.1	0.12	0	0	0	0.05	0	0.04	0	0.1	0
chr1	G	11413871	CG	0.01	0.02	0	0	0.02	0.05	0.05	0	0	0	0.07	0.02	0	0.06	0
chr1	G	11413873	CG	0.02	0	0	0	0	0.07	0	0.06	0.01	0.01	0	0	0	0	0
chr1	G	11413902	CG	0.09	0.05	0	0.05	0.05	0	0	0.08	0.11	0.1	0.03	0.02	0.04	0.07	0.05
chr1	C	11414187	CG	0.15	0.04	0.03	0.05	0.09	0.09	0	0.14	0.01	0	0.09	0.01	0	0.01	0.05
chr1	C	11414190	CG	0.02	0	0.01	0	0.01	0.01	0	0.06	0	0	0.06	0.01	0	0.04	0
chr1	C	11414200	CG	0.02	0	0	0	0.01	0.03	0	0	0	0.02	0.03	0	0.15	0	0
chr1	G	11414201	CG	0.01	0	0	0	0	0.08	0	0	0	0	0	0	0	0.01	0
chr1	C	11414204	CG	0	0	0	0.01	0	0	0	0	0	0	0	0.13	0	0	0
chr1	G	11414205	CG	0.01	0.01	0.02	0.04	0.01	0.02	0	0	0	0	0	0	0.09	0	0
chr1	C	11414209	CG	0	0	0	0.02	0	0	0	0	0	0	0	0	0.15	0	0
chr1	G	11414210	CG	0.03	0.01	0	0	0	0.02	0	0.05	0	0	0	0.02	0.02	0	0
chr1	C	11414211	CG	0.02	0.04	0.01	0	0.01	0	0	0.02	0.01	0	0	0.04	0.15	0.01	0.02
chr1	G	11414212	CG	0	0.01	0	0	0.01	0.03	0	0.01	0.01	0.01	0.04	0.02	0	0	0.01
chr1	C	11414232	CG	0	0.01	0	0	0	0.01	0	0	0	0	0	0.01	0	0.04	0.05
chr1	G	11414233	CG	0	0.01	0	0.01	0	0.01	0.01	0.01	0	0.01	0	0.03	0.02	0.01	0.04
chr1	G	11414239	CG	0	0	0.02	0.02	0	0.01	0	0.01	0	0	0	0	0.1	0.05	0.03
chr1	G	11414246	CG	0.05	0.05	0.1	0.09	0.11	0.07	0.04	0.01	0.08	0.12	0.01	0	0	0.14	0.03
chr1	C	11415001	CG	0.24	0.26	0.31	0.24	0.29	0.27	0.34	0.3	0.28	0.2	0.31	0.26	0.32	0.28	0.25
chr1	C	11439134	CG	0.51	0.6	0.64	0.67	0.8	0.58	0.62	0.69	0.57	0.5	0.7	0.74	0.83	0.71	0.68
chr1	C	11665301	CG	1	1	1	1	1	1	1	1	0.93	1	1	0.8	1	1	1
chr1	C	11665347	CG	0	0	0	0	0	0	0	0	0.06	0	0	0	0	0.05	0
chr1	G	11673455	CG	0.44	0.5	0.6	0.31	0.44	0.27	0.54	0.56	0.5	0.5	0.5	0.54	0	0.38	0.43
chr1	G	11673484	CG	0.67	0.86	0.8	0.57	1	0.8	0.67	0.83	0.73	0.83	0.71	0.75	0.71	0.67	0.75
chr1	G	11709521	CG	0.6	0.69	0.7	0.87	0.66	0.76	0.71	0.55	0.71	0.85	0.55	0.77	0.4	0.5	0.56
chr1	G	11709526	CG	0.96	0.92	0.82	0.98	0.89	0.95	0.96	0.93	0.9	0.98	0.7	0.77	0.67	1	1
chr1	C	11710819	CG	1	1	0.84	0.94	0.83	0.88	0.84	0.96	0.98	0.98	0.97	0.87	1	0.76	0.94
chr1	C	11710861	CG	0.8	0.85	0.85	0.94	0.84	0.86	0.9	0.96	0.97	0.98	0.9	0.82	0.96	1	0.88
chr1	C	11720494	CG	0.8	0.81	0.82	0.83	0.82	0.78	0.91	0.8	0.88	0.88	0.9	0.74	0.87	0.9	0.79
chr1	C	11720509	CG	0.8	0.85	0.85	0.78	0.82	0.82	0.88	0.81	0.76	0.82	0.87	0.8	0.76	0.79	0.88
chr1	C	11720529	CG	0.82	0.78	0.8	0.83	0.82	0.81	0.89	0.85	0.86	0.83	0.84	0.79	0.78	0.85	0.85
chr1	G	11720575	CG	0.89	0.71	0.8	0.89	0.86	1	0.83	0.95	0.82	0.83	0.85	0.89	0.85	0.8	0.85
chr1	G	11720623	CG	0.94	0.89	0.97	0.95	0.93	0.97	1	0.93	0.97	0.97	0.99	1	1	1	1
chr1	C	11730433	CG	0.93	0.93	0.94	0.89	0.92	0.94	0.92	0.95	0.94	0.94	0.89	0.95	0.97	0.95	0.94
chr1	G	11730604	CG	0.92	0.94	0.86	0.88	0.92	0.92	0.89	0.9	0.9	0.92	0.88	0.94	0.94	0.94	0.9
chr1	C	11782889	CG	0.78	0.87	0.92	0.88	0.91	0.82	0.97	0.95	0.79	1	1	0.78	0.79	0.83	0.7
chr1	C	11782914	CG	0.76	0.8	0.78	0.84	0.81	0.84	0.98	0.94	0.89	0.9	0.9	0.8	0.89	0.92	0.83
chr1	C	11805458	CG	0.87	0.97	0.84	0.91	0.97	0.92	0.98	0.91	0.89	0.98	1	0.93	1	0.75	0.98
chr1	C	11805497	CG	0.73	0.65	0.63	0.62	0.64	0.64	0.58	0.67	0.73	0.75	0.64	0.65	0.14	0.41	0.77
chr1	G	11805498	CG	0.7	0.65	0.73	0.63	0.67	0.67	0.66	0.7	0.77	0.62	0.44	0.57	0.77	0.67	0.58
chr1	G	11805521	CG	0.85	0.98	0.96	0.94	0.96	0.9	0.94	0.97	0.98	0.91	0.89	0.97	1	0.99	0.99
chr1	C	11839948	CG	0.85	0.94	0.91	0.88	0.93	0.92	0.93	0.86	0.91	0.91	0.89	0.88	0.83	0.96	0.96
chr1	G	11840045	CG	0.96	0.93	0.93	0.93	0.95	0.88	0.97	0.9	0.96	0.99	0.88	0.86	1	0.88	0.98
chr1	G	11853851	CG	0.95	0.99	0.96	0.96	0.93	0.96	0.97	0.98	0.92	0.97	0.97	0.99	0.94	0.92	0.97
chr1	G	11853865	CG	0.93	1	0.97	0.97	0.98	0.97	0.89	0.96	0.98	0.96	0.99	0.94	0.94	0.98	0.98
chr1	G	11853889	CG	0.81	0.75	0.84	0.86	0.75	0.82	0.81	0.79	0.85	0.85	0.81	0.79	0.83	0.83	0.79
chr1	G	11853927	CG	1	1	0.86	0.8	0.92	0.87	0.86	1	0.9	1	0.88	0.67	1	0.86	0.89
chr1	C	11860780	CG	0.82	0.92	0.89	0.63	0.83	0.7	0.77	0.85	0.88	0.73	0.86	1	0.93	1	0.88
chr1	G	11860958	CG	0.84	0.97	0.85	0.89	0.85	0.9	0.91	0.95	0.9	0.77	0.88	0.94	0.87	0.92	0.96
chr1	C	11937238	CG	1	0.95	0.92	1	0.88	1	0.89	1	0.92	1	1	1	1	1	1
chr1	G	11949455	CG	0.88	1	1	1	1	0.89	0.9	1	1	1	1	1	1	1	0.88
chr1	G	11949460	CG	1	1	1	1	1	1	0.9	0.92	1	1	1	0.94	0.89	1	1
chr1	G	11949491	CG	1	1	1	1	1	1	0.9	0.85	1	0.92	1	1	1	1	1
chr1	G	12044837	CG	0.89	0.92	0.89	0.93	1	0.88	0.79	0.86	0.97	0.9	0.96	0.94	1	1	1
chr1	C	12075615	CG	0.97	0.98	0.93	0.97	0.96	0.92	0.95	0.88	0.99	0.96	0.95	1	1	1	0.98
chr1	C	12075631	CG	0.96	0.9	0.99	0.96	0.93	0.92	0.99	0.99	0.98	1	0.93	0.95	1	0.99	1
chr1	C	12075637	CG	1	0.85	1	0.91	0.9	0.93	0.94	0.95	0.93	0.97	1	0.85	0.97	0.94	0.98
chr1	C	12075641	CG	0.8	0.67	0.74	0.82	0.77	0.85	0.94	0.95	0.95	0.95	0.9	0.71	1	0.93	0.98
chr1	C	12075648	CG	0.96	0.87	0.97	0.92	0.9	0.9	0.96	0.95	0.9	0.99	0.95	0.76	0.97	0.96	1
chr1	C	12138330	CG	0.91	0.85	0.87	0.83	0.87	0.89	0.88	0.89	0.9	0.97	0.76	0.89	0.88	0.97	0.89
chr1	C	12264888	CG	0.8	0.93	1	1	1	1	0.91	0.86	0.93	0.82	0.83	0.82	1	1	1
chr1	C	12264930	CG	0.71	0.33	0.5	0.72	0.67	0.78	0.43	0.75	0.63	0.59	0.63	0.57	0.59	0.57	0.6
chr1	C	12270029	CG	0.94	1	0.92	1	1	1	0.89	0.94	0.95	1	1	1	1	1	0.94
chr1	C	12270036	CG	0.2	0.6	0.88	0.75	0.76	0.68	0.22	0.59	0.77	0.55	0.75	0.84	1	0.5	0.94
chr1	C	12270052	CG	1	0.91	0.96	1	1	0.92	0.78	0.76	0.77	0.82	0.94	0.95	0.6	0.83	0.94
chr1	C	12270057	CG	0.89	0.76	0.97	0.92	0.96	0.89	0.88	0.88	0.88	0.78	0.88	1	1	1	0.9
chr1	C	12270073	CG	0.67	0.71	0.93	0.73	0.83	0.92	0.22	0.61	0.8	0.4	0.86	0.9	0.83	0.67	0.86
chr1	C	12313837	CG	0.75	0.88	0.68	0.77	0.72	0.67	0.8	0.95	0.8	0.72	0.8	0.75	0.51	0.75	0.84
chr1	C	12313873	CG	0.75	0.8	0.7	0.71	0.82	0.86	0.81	0.6	0.76	0.72	0.85	1	0.76	0.91	0.75
chr1	C	12344892	CG	0.75	0.92	0.93	0.92	0.91	0.86	0.92	0.93	0.93	0.94	0.92	0.96	0.86	0.99	0.95
chr1	C	12344902	CG	0.86	0.94	0.95	0.9	0.91	0.93	0.86	0.95	0.92	0.84	0.95	0.89	0.92	0.88	0.94
chr1	C	12344940	CG	0.91	0.85	0.8	0.92	0.85	0.93	0.91	0.83	0.86	0.76	0.79	0.84	0.76	0.72	0.99
chr1	G	12344941	CG	0.9	0.85	0.9	0.89	0.88	0.79	0.84	0.86	0.82	0.8	0.83	0.9	0.89	0.85	0.88
chr1	G	12344968	CG	0.83	0.8	0.79	0.74	0.83	0.79	0.83	0.83	0.87	0.77	0.68	0.82	0.83	0.84	0.82
chr1	G	12344971	CG	0.79	0.78	0.84	0.73	0.76	0.74	0.76	0.79	0.75	0.78	0.77	0.79	0.81	0.75	0.76
chr1	G	12344982	CG	0.72	0.62	0.69	0.63	0.63	0.66	0.62	0.76	0.62	0.62	0.63	0.69	0.66	0.59	0.57
chr1	C	12457740	CG	0.88	0.86	0.83	0.95	0.98	0.99	0.96	0.92	0.93	0.94	0.86	0.85	0.97	0.97	0.98
chr1	G	12457839	CG	0.8	0.86	0.95	0.82	0.83	0.92	0.81	0.88	0.83	0.89	0.71	1	0.86	0.8	0.68
chr1	C	12457858	CG	0.87	0.9	0.91	0.93	0.84	0.84	0.88	0.89	0.91	0.87	0.86	0.95	0.88	0.9	0.9
chr1	G	12457859	CG	0.94	0.96	0.91	0.99	0.93	1	0.95	0.91	0.92	0.98	1	1	1	1	1
chr1	G	12457942	CG	0.92	0.88	0.87	0.89	0.92	0.95	0.87	0.95	0.91	0.99	0.95	0.98	0.93	0.96	0.92
chr1	C	12470422	CG	1	0.94	1	0.92	0.91	0.98	1	1	0.92	0.99	0.95	0.99	0.92	0.97	1
chr1	C	12498569	CG	0.96	1	0.98	0.87	0.98	1	0.92	1	1	1	1	1	0.9	1	1
chr1	C	12498580	CG	0.96	1	1	1	0.98	1	1	0.96	0.91	0.86	1	0.96	1	1	0.95
chr1	G	12498726	CG	0.72	0.93	0.93	1	0.91	0.98	0.98	0.95	0.88	0.97	0.9	1	0.92	0.96	0.95
chr1	C	12498752	CG	1	0.81	0.87	0.94	0.86	0.96	1	1	0.95	1	0.98	0.97	1	1	0.97
chr1	G	12498753	CG	0.57	0.74	0.82	0.74	0.7	0.84	0.75	0.9	0.63	0.63	0.65	0.66	0.74	0.7	0.78
chr1	G	12498756	CG	0.57	0.89	0.78	0.78	0.78	0.85	0.66	0.91	0.68	0.82	0.68	0.77	0.74	0.76	0.77
chr1	C	12498773	CG	0	0	0	0	0	0	0	0	0	0	0	0	0	0	0
chr1	G	12498774	CG	0.95	1	0.94	0.98	1	0.99	1	0.99	1	0.96	1	1	0.95	0.96	0.98
chr1	G	12515736	CG	0.94	0.97	0.97	0.99	0.97	0.98	0.99	0.99	0.97	0.96	0.88	0.96	0.92	0.96	0.98
chr1	C	12565846	CG	1	0.96	0.98	0.91	1	1	0.78	1	1	1	0.98	0.97	1	0.96	0.97
chr1	C	12565861	CG	0.91	0.96	1	0.77	0.93	0.85	0.94	0.94	0.94	0.9	0.98	0.95	1	0.93	1
chr1	G	12565862	CG	1	1	0.98	0.82	1	0.88	1	1	1	0.96	0.87	0.89	1	0.95	1
chr1	G	12565901	CG	1	1	0.98	0.88	0.96	1	1	0.96	0.97	0.83	0.96	0.94	0.85	1	0.83
chr1	G	12668443	CG	0.68	0.77	0.52	0.68	0.78	0.66	0.69	0.76	0.73	0.66	0.7	0.88	0.82	0.71	0.74
chr1	G	12668477	CG	0.71	0.93	0.81	0.86	0.98	0.83	0.88	0.92	0.93	0.84	0.9	0.82	1	0.84	0.85
chr1	C	12693230	CG	0.05	0.02	0.11	0.07	0.07	0.07	0.09	0.09	0.06	0.06	0.1	0.05	0.09	0.02	0.05
chr1	C	12693239	CG	0.02	0.02	0.01	0.02	0.03	0.04	0.02	0.08	0.02	0.01	0.05	0	0.03	0.01	0.04
chr1	C	12693245	CG	0.02	0.01	0.02	0.02	0.03	0	0	0.02	0.02	0.01	0.05	0.01	0.07	0	0.08
chr1	C	12693257	CG	0.01	0.02	0	0	0.02	0.02	0	0.01	0.01	0	0.04	0.01	0.01	0	0.07
chr1	C	12693279	CG	0.02	0.02	0.03	0.01	0.04	0.04	0	0.05	0.03	0.02	0.05	0.01	0.06	0.02	0
chr1	C	12693333	CG	0	0	0.28	0	0.02	0	0	0	0.06	0.28	0	0.05	0	0	0.06
chr1	G	12693334	CG	0.11	0.1	0.09	0.06	0.04	0.07	0.07	0.07	0.06	0.1	0.13	0.04	0.04	0.03	0.02
chr1	C	12693365	CG	0	0	0.11	0.03	0.12	0.11	0.07	0.14	0	0.22	0	0.04	0	0	0.06
chr1	C	12693368	CG	0	0.04	0.04	0	0.04	0	0.04	0	0.13	0	0	0	0.4	0	0.06
chr1	G	12704576	CG	0.27	0.32	0.3	0.23	0.75	0.35	0.26	0.29	0.32	0.09	0.1	0.06	0.78	0.13	0.55
chr1	C	12730287	CG	0.55	0.67	0.71	0.73	0.55	0.53	0.55	0.55	0.37	0.57	0.45	0.61	0.8	1	0.43
chr1	G	12795553	CG	0.52	0.46	0.58	0.46	0.47	0.55	0.54	0.43	0.6	0.58	0.51	0.51	0.55	0.52	0.5
chr1	C	12836024	CG	0.02	0.01	0.04	0.04	0.02	0.07	0.08	0.03	0.13	0	0.02	0	0	0.04	0.08
chr1	C	12836032	CG	0	0	0	0.03	0.01	0	0	0.04	0.04	0.06	0.03	0	0	0	0.03
chr1	G	12836099	CG	0	0	0	0	0.02	0.02	0.07	0.01	0	0	0	0	0.17	0	0
chr1	G	12836128	CG	0	0.02	0	0	0	0	0.02	0	0	0	0	0	0.17	0.02	0
chr1	G	12836140	CG	0.08	0.04	0.01	0.03	0.05	0.07	0.11	0.05	0.01	0.16	0.04	0.06	0	0.07	0
chr1	C	12838291	CG	0.92	0.94	0.67	0.87	1	0.92	0.6	1	1	0.92	0.88	1	1	0.73	1
chr1	C	12838330	CG	0.9	0.88	0.82	0.85	0.98	0.91	0.24	0.75	0.96	0.96	0.94	0.54	0.69	0.86	0.9
chr1	G	12838386	CG	0.9	0.79	0.87	0.88	0.87	0.82	0.86	0.88	0.86	0.81	0.74	0.88	0.86	0.83	0.91
chr1	C	12851825	CG	0.5	0.42	0.55	0.53	0.4	0.57	0.42	0.43	0.51	0.45	0.54	0.35	0.44	0.44	0.2
chr1	G	12851924	CG	0.43	0.4	0.48	0.42	0.48	0.36	0.42	0.38	0.45	0.43	0.39	0.39	0.46	0.37	0.48
chr1	C	12871850	CG	0.66	0.62	0.46	0.61	0.71	0.68	0.63	0.64	0.61	0.67	0.66	0.64	0.61	0.66	0.6
chr1	C	12871882	CG	0.77	0.66	0.65	0.6	0.76	0.72	0.63	0.69	0.63	0.76	0.66	0.68	0.82	0.66	0.75
chr1	C	12871891	CG	0.76	0.68	0.73	0.59	0.69	0.61	0.71	0.65	0.71	0.71	0.56	0.57	0.65	0.69	0.64
chr1	G	12871892	CG	0.65	0.67	0.63	0.69	0.69	0.56	0.65	0.71	0.65	0.62	0.64	0.57	0.74	0.61	0.81
chr1	C	12871940	CG	0.7	0.64	0.6	0.68	0.63	0.63	0.69	0.63	0.51	0.65	0.51	0.6	0.64	0.5	0.57
chr1	G	12871941	CG	0.6	0.64	0.65	0.63	0.7	0.58	0.61	0.63	0.63	0.56	0.62	0.71	0.65	0.59	0.66
chr1	G	12872035	CG	0.23	0.44	0.3	0.47	0.42	0.44	0.3	0.32	0.4	0.38	0.39	0.32	0.48	0.35	0.4
chr1	C	12971880	CG	1	0.99	0.9	0.95	0.96	1	0.95	0.99	0.95	1	1	1	0.79	0.85	1
chr1	C	12971922	CG	0.94	0.93	0.97	0.96	0.97	1	0.95	1	0.98	1	1	1	1	0.91	1
chr1	G	12971976	CG	0.84	0.89	0.75	0.85	0.91	0.67	0.92	0.92	0.82	0.77	0.83	0.96	0.82	0.86	0.68
chr1	G	12976139	CG	0.67	0.5	0.38	0.67	0.29	0.33	0.38	0.43	0.38	0.13	0	0.36	0.08	0	0.13
chr1	G	12990558	CG	0	0.24	0.06	0.08	0.16	0.21	0.75	0.54	0.73	0.06	0.24	0	0.14	0	0.42
chr1	C	12990572	CG	0.77	0.83	0.71	0.75	0.88	0.38	0.94	0.8	0.86	0.79	1	1	1	0.33	0.86
chr1	G	12990573	CG	0.94	1	0.94	0.85	0.94	0.97	0.67	1	1	1	1	1	1	0.82	1
chr1	G	12990586	CG	0.35	0.33	0.44	0.32	0.3	0.22	0.5	0.57	0.36	0.06	0.48	0	0.29	0.67	0.44
chr1	C	12990602	CG	0.09	0.14	0.05	0.07	0.14	0.15	0.06	0.11	0.05	0.09	0.04	0.08	0.08	0.11	0.17
chr1	G	12990603	CG	0.11	0.12	0.06	0	0.19	0.16	0.43	0.17	0.27	0.28	0.26	0	0	0.17	0.38
chr1	G	12990673	CG	0.03	0.02	0.04	0.02	0.03	0	0.07	0.01	0.09	0	0.08	0	0.12	0.17	0.04
chr1	C	12990700	CG	0.1	0.11	0.05	0.04	0.13	0.13	0.04	0.09	0.16	0.14	0.16	0.05	0.16	0.14	0.1
chr1	G	12990701	CG	0.11	0.04	0.03	0.11	0.11	0.1	0.09	0.11	0.05	0.03	0.17	0.13	0.02	0.22	0.11
chr1	C	12990719	CG	0.04	0.03	0.03	0	0.04	0.01	0.05	0.04	0.02	0.03	0.09	0.2	0.1	0.02	0.03
chr1	C	12990721	CG	0.13	0.05	0.05	0.14	0.08	0.02	0.1	0.1	0.09	0.06	0.1	0.17	0.16	0.06	0.11
chr1	C	12990729	CG	0.02	0.05	0.01	0	0.04	0.02	0.06	0.05	0.04	0	0.07	0.04	0.15	0.08	0.06
chr1	G	12990768	CG	0.06	0.04	0.01	0.03	0.05	0.04	0	0.05	0.09	0.01	0	0.1	0	0.11	0.06
chr1	G	12990770	CG	0.02	0.08	0.1	0.08	0.06	0.02	0.01	0.08	0.04	0.05	0	0.11	0	0.1	0.08
chr1	G	12990777	CG	0.11	0.09	0.14	0.17	0.1	0.17	0.01	0.15	0.13	0.06	0.06	0.02	0.14	0.11	0.11
chr1	G	12990784	CG	0.02	0.2	0.08	0.07	0.08	0.1	0.06	0.19	0.18	0.02	0.02	0.19	0.11	0.22	0.09
chr1	G	12990786	CG	0.03	0.04	0.16	0.05	0.03	0.04	0	0.09	0.05	0.02	0	0.11	0.22	0.09	0.02
chr1	G	12990790	CG	0.06	0.11	0.1	0.08	0.09	0.22	0.05	0.16	0.13	0.06	0.09	0.1	0	0.12	0.12
chr1	C	12991026	CG	0	0.02	0.16	0.05	0.04	0.12	0.07	0.08	0.16	0	0	0.33	0	0.11	0.09
chr1	C	12991049	CG	0	0	0.01	0.02	0	0	0	0.01	0	0.04	0	0	0	0	0.03
chr1	C	12991067	CG	0.02	0.04	0	0	0.02	0	0.02	0	0.02	0.01	0	0	0	0	0.03
chr1	G	12991092	CG	0.02	0	0.01	0	0	0	0	0	0	0	0.03	0	0	0.02	0
chr1	G	12991131	CG	0.11	0.12	0	0.04	0.02	0.03	0.09	0.02	0.04	0.04	0	0.03	0.15	0.02	0.08
chr1	C	12992239	CG	0.11	0.03	0	0.2	0.03	0.18	0.12	0	0	0	0	0	0.17	0	0.1
chr1	C	12992253	CG	0	0	0	0	0	0	0	0	0	0	0	0	0	0	0
chr1	G	12992254	CG	0	0	0	0	0	0.03	0	0	0	0	0	0	0	0	0
chr1	C	12992263	CG	0	0	0	0	0	0	0	0	0	0	0.02	0	0	0	0
chr1	G	12992264	CG	0	0	0	0	0	0	0.01	0.02	0	0	0	0	0	0	0
chr1	C	12992266	CG	0	0.03	0	0	0.04	0	0	0	0	0	0	0	0	0	0
chr1	G	12992267	CG	0	0	0	0	0	0	0.03	0	0.02	0	0	0	0	0	0
chr1	G	12992282	CG	0.1	0.11	0.13	0.13	0.06	0.13	0.12	0.11	0.22	0	0.05	0.03	0	0.02	0.2
chr1	C	12992460	CG	0.07	0.04	0.02	0.02	0.09	0	0.02	0.13	0.07	0.01	0.14	0	0.03	0.04	0.09
chr1	C	12992477	CG	0	0.01	0	0.01	0	0.01	0.01	0.01	0	0.01	0	0	0.01	0	0
chr1	C	12992491	CG	0	0.02	0	0	0	0	0	0.01	0	0	0.01	0	0	0	0
chr1	C	12992494	CG	0.01	0	0.01	0.01	0	0	0	0.02	0	0	0	0.01	0	0	0
chr1	C	12992506	CG	0.02	0.01	0	0	0	0	0	0.01	0.01	0.01	0	0	0.01	0.02	0
chr1	G	12992507	CG	0	0	0.03	0	0.01	0.01	0	0.02	0.01	0	0	0.01	0.03	0	0
chr1	G	12992519	CG	0.06	0	0.02	0	0.01	0	0.02	0	0.01	0	0	0	0.03	0	0
chr1	G	12992532	CG	0	0	0	0	0.01	0	0	0.03	0.01	0.01	0	0.02	0	0.02	0
chr1	G	12992541	CG	0.03	0.01	0.01	0	0.02	0.01	0.02	0.01	0.04	0	0.02	0.01	0	0.02	0
chr1	G	12992553	CG	0.06	0.05	0.04	0.06	0.04	0.06	0.03	0.02	0.06	0.09	0	0.02	0.03	0	0
chr1	C	12995686	CG	1	1	1	1	0.97	1	1	0.96	0.99	0.98	1	0.85	1	1	1
chr1	C	12995718	CG	1	0.96	0.96	0.97	1	0.9	0.97	0.98	0.96	1	1	0.79	1	1	1
chr1	G	12995764	CG	1	1	0.99	1	0.99	0.96	1	1	1	1	0.99	1	1	1	0.98
chr1	G	12995775	CG	0.96	1	1	0.97	0.99	0.96	0.95	0.98	0.99	0.99	0.96	0.98	1	1	0.98
chr1	C	13015538	CG	1	1	1	1	0.67	0.88	0.97	1	0.94	0.91	1	0.93	1	1	0.83
chr1	C	13015544	CG	1	0.71	0.7	0.67	0.64	0.56	0.67	0.77	0.78	0.8	0.93	0.93	1	0.64	0.64
chr1	C	13020829	CG	1	1	1	1	1	0.8	1	0.96	0.96	0.98	1	1	1	1	0.87
chr1	C	13020849	CG	0.86	0.88	0.74	0.6	0.87	0.74	0.74	0.89	0.45	0.72	0.92	0.92	0.7	0.93	0.94
chr1	G	13020850	CG	0.94	0.83	0.84	0.85	0.9	0.98	0.56	0.9	0.75	0.84	0.82	0.98	1	0.95	0.83
chr1	G	13020890	CG	0.96	0.9	0.96	0.97	0.92	0.95	0.91	0.92	0.95	0.95	1	1	1	0.78	0.65
chr1	C	13029371	CG	0.87	0.89	0.83	0.89	0.86	0.89	0.89	0.95	0.91	0.92	0.79	0.96	0.97	0.95	0.91
chr1	C	13029378	CG	0.81	0.89	0.88	0.95	0.88	0.89	0.87	0.88	0.93	0.82	0.83	0.76	0.78	0.89	0.8
chr1	C	13029385	CG	0.82	0.63	0.82	0.67	0.65	0.59	0.69	0.65	0.83	0.64	0.59	0.47	0.73	0.74	0.7
chr1	G	13029454	CG	0.92	0.9	0.91	0.85	0.89	0.9	0.98	0.86	0.74	0.86	0.85	0.85	0.86	0.76	0.95
chr1	G	13029470	CG	0.86	0.8	0.91	0.89	0.88	0.89	0.9	0.91	0.79	0.94	0.85	0.89	0.92	0.83	0.92
chr1	C	13064180	CG	0.86	0.9	0.87	0.96	0.87	0.92	0.79	0.88	0.88	0.82	0.84	0.89	0.95	0.81	0.84
chr1	C	13064211	CG	0.91	0.78	0.88	0.93	0.84	0.85	0.72	0.83	0.73	0.75	0.79	0.96	0.71	0.91	0.93
chr1	G	13064212	CG	0.65	0.77	0.94	0.66	0.84	0.79	0.94	0.83	0.87	0.71	0.88	0.74	0.77	0.72	0.95
chr1	G	13064261	CG	0.9	0.95	0.85	0.87	0.87	0.88	0.85	0.94	0.73	0.9	0.81	0.81	1	0.76	0.95
chr1	G	13064430	CG	0.1	0.12	0.29	0.14	0.33	0.13	0.22	0	0.13	0.19	0.07	0.22	0	0.4	0.11
chr1	C	13104044	CG	0.09	0.03	0.03	0.04	0.11	0.05	0.03	0.03	0.05	0.01	0.05	0.14	0.02	0.06	0.07
chr1	C	13104064	CG	0	0.02	0.01	0.02	0.03	0.03	0.02	0.03	0.04	0.01	0.05	0.08	0.01	0.04	0.01
chr1	C	13104079	CG	0.03	0.02	0.02	0.02	0.03	0.02	0.04	0.05	0	0.04	0.03	0.01	0	0.03	0.01
chr1	G	13104080	CG	0.04	0.02	0	0.03	0.02	0.05	0.01	0.01	0.04	0.03	0	0.01	0.14	0.02	0.01
chr1	G	13104108	CG	0.07	0.05	0.05	0.05	0.05	0.04	0.04	0.03	0.08	0.03	0.04	0.08	0.01	0.19	0.07
chr1	G	13104115	CG	0.02	0.03	0.02	0.01	0.03	0	0	0	0	0	0.02	0.01	0	0.01	0
chr1	G	13104119	CG	0.12	0.08	0.02	0.1	0.08	0.05	0.04	0.05	0.09	0.07	0.03	0.03	0.02	0.08	0.11
chr1	G	13104931	CG	0.82	0.89	0.95	0.88	0.92	0.84	0.85	0.94	0.76	0.87	0.86	0.75	1	0.76	0.67
chr1	G	13104941	CG	0.64	0.68	0.62	0.56	0.5	0.43	0.74	0.74	0.64	0.53	0.63	0.75	1	0.56	0.48
chr1	C	13104970	CG	0.71	0.81	0.68	0.85	0.78	0.75	0.41	0.72	0.67	0.55	0.85	0.68	0.83	0.78	0.53
chr1	G	13104971	CG	0.77	0.93	0.71	0.77	0.85	0.81	0.88	0.94	0.95	0.79	0.91	0.96	1	0.94	0.95
chr1	C	13105000	CG	0.59	0.81	0.72	0.88	0.71	0.71	0.82	0.68	0.72	0.66	0.78	0.61	0.93	0.61	0.63
chr1	C	13105014	CG	0.55	0.84	0.53	0.58	0.48	0.64	0.56	0.66	0.43	0.64	0.69	0.55	0.76	0.43	0.47
chr1	C	13125120	CG	0.16	0.14	0.13	0.16	0.09	0.12	0.17	0.19	0.15	0.12	0.22	0.1	0.17	0.16	0.15
chr1	G	13125215	CG	0.02	0.07	0.09	0.01	0.06	0.03	0.01	0.03	0.04	0.06	0.06	0.06	0.02	0.07	0.03
chr1	G	13125228	CG	0.16	0.26	0.13	0.1	0.15	0.12	0.08	0.12	0.12	0.24	0.18	0.21	0.02	0.14	0.07
chr1	C	13126776	CG	0	0.1	0.03	0	0	0.13	0	0.16	0.03	0	0	0.11	0.1	0.04	0
chr1	C	13126781	CG	0	0	0.14	0	0	0	0.05	0	0.17	0	0	0	0	0	0
chr1	C	13126817	CG	0.09	0	0.15	0.05	0.22	0	0.26	0.17	0	0.12	0	0	0	0	0
chr1	G	13126866	CG	0	0.16	0.11	0.07	0.19	0.02	0.14	0.31	0	0.26	0.2	0	0.6	0	0.24
chr1	G	13126873	CG	0	0.16	0.22	0.1	0.22	0.1	0	0.27	0.03	0.52	0.16	0	0.8	0.14	0.44
chr1	G	13126898	CG	0.17	0	0.2	0.07	0.3	0.28	0.19	0.23	0	0.03	0.29	0	0.2	0.14	0.26
chr1	G	13126904	CG	0.1	0.13	0.09	0	0.15	0.14	0.03	0.12	0.07	0.22	0.16	0	0.18	0.19	0.18
chr1	C	13128356	CG	0.05	0	0.09	0	0.05	0.07	0	0.29	0	0.11	0.41	0.04	0.33	0	0
chr1	C	13128390	CG	0	0	0	0	0.08	0	0	0.21	0	0	0.18	0	0	0	0
chr1	G	13128391	CG	0	0	0	0	0	0	0	0	0	0	0	0	0	0	0
chr1	C	13128412	CG	0.16	0.08	0.12	0.19	0.08	0.17	0.16	0.09	0.15	0.09	0.12	0.07	0.09	0.11	0.1
chr1	G	13128498	CG	0.12	0.08	0.09	0.07	0.07	0.1	0.08	0.11	0.1	0.03	0.12	0.11	0.08	0.09	0.08
chr1	C	13147823	CG	0.97	1	0.99	0.97	0.99	1	0.95	0.85	0.91	0.99	1	1	0.98	1	1
chr1	G	13147923	CG	0.98	0.95	0.98	0.96	0.97	1	0.99	0.96	0.99	1	0.93	0.94	1	0.99	0.88
chr1	C	13158505	CG	0.73	0.52	0.7	0.56	0.59	0.63	0.65	0.59	0.62	0.64	0.65	0.62	0.63	0.59	0.5
chr1	C	13158508	CG	0.83	0.76	0.86	0.86	0.78	0.81	0.77	0.81	0.85	0.87	0.68	0.89	0.67	0.78	0.75
chr1	C	13159845	CG	0.9	0.86	0.87	0.88	0.87	0.9	0.95	0.95	0.92	0.88	0.91	0.89	0.8	0.88	0.9
chr1	G	13159916	CG	0.99	0.99	0.96	0.98	0.96	0.97	0.94	0.93	0.96	1	0.98	0.98	1	0.96	0.97
chr1	G	13159957	CG	0.95	0.96	0.97	0.98	0.98	0.94	0.96	1	0.99	0.93	0.97	0.95	0.96	0.96	0.93
chr1	C	13166833	CG	0.8	0.93	0.99	0.95	0.93	0.9	0.98	0.95	0.99	0.92	0.95	1	1	0.76	0.81
chr1	G	13166911	CG	0.97	0.97	0.99	0.93	0.86	0.96	0.89	0.77	0.88	0.84	0.89	1	0.94	0.83	1
chr1	G	13166933	CG	0.82	0.91	0.86	0.97	0.79	0.9	0.84	0.81	0.89	0.79	0.95	0.89	0.87	0.77	0.95
chr1	C	13174990	CG	0.96	0.92	0.94	0.89	0.92	0.9	0.94	0.94	0.97	0.89	0.99	1	0.9	0.99	0.85
chr1	G	13174991	CG	0.02	0.01	0.04	0.04	0.03	0	0.14	0.11	0.01	0.21	0.08	0	0.02	0.03	0.03
chr1	C	13175001	CG	0.94	0.99	0.97	0.93	0.95	0.96	0.94	0.96	0.98	0.89	0.9	1	1	1	0.99
chr1	G	13175002	CG	0.93	0.96	0.94	0.97	0.95	0.94	0.8	0.96	1	1	0.96	1	1	0.97	1
chr1	C	13175020	CG	0.98	0.95	0.98	0.95	0.96	0.92	0.89	0.97	0.98	0.81	0.94	0.91	0.98	0.99	0.96
chr1	G	13175021	CG	0.96	0.91	0.96	0.98	0.92	0.97	0.78	0.94	0.9	0.91	0.85	0.69	1	0.95	0.88
chr1	C	13175036	CG	0.04	0.07	0.06	0.04	0.1	0.11	0.04	0.08	0.02	0.14	0.06	0.08	0.02	0.11	0.1
chr1	G	13175037	CG	0.94	0.74	0.83	0.97	0.92	0.9	0.85	0.89	0.84	1	0.91	0.69	0.92	0.89	0.85
chr1	C	13182558	CG	1	0.96	0.97	0.96	1	0.96	0.94	0.93	1	0.95	1	0.92	0.91	1	1
chr1	C	13182578	CG	0.95	0.94	0.94	0.97	0.98	0.91	1	0.86	1	1	1	1	0.96	0.96	0.9
chr1	G	13182622	CG	0.96	1	0.98	0.94	0.96	1	0.89	0.98	0.99	1	1	1	1	1	1
chr1	G	13182671	CG	0.95	0.92	1	0.97	0.99	1	0.99	0.98	1	0.87	0.91	0.92	1	1	1
chr1	C	13219329	CG	0.91	0.86	0.86	0.82	0.96	0.83	0.86	0.79	0.9	0.78	0.92	0.8	0.9	0.89	0.93
chr1	G	13219401	CG	0.83	0.66	0.75	0.53	0.56	0.36	0.5	0.56	0.51	0.5	0.78	0.22	0.67	0.65	0.36
chr1	G	13245259	CG	0.6	0.6	0.5	1	0.13	0.67	0.38	0.19	0.61	0.36	0.55	0.65	0.54	0.64	0.42
chr1	G	13264955	CG	0.98	0.98	0.97	0.9	0.98	0.87	0.97	0.97	0.99	0.97	0.96	0.98	1	0.96	1
chr1	G	13264995	CG	1	1	1	0.99	0.98	0.96	0.99	0.99	1	1	0.98	1	1	1	0.92
chr1	C	13372130	CG	0.22	0.05	0.03	0.01	0.05	0.08	0.06	0.03	0.17	0.03	0.08	0.04	0.16	0.04	0.08
chr1	C	13372161	CG	0	0	0.01	0	0.01	0	0	0	0	0	0	0	0	0	0.02
chr1	G	13372203	CG	0.02	0	0.04	0.02	0	0	0	0	0	0	0	0	0.26	0	0.03
chr1	G	13372205	CG	0	0	0	0.01	0.02	0.02	0	0	0	0.01	0	0	0	0	0
chr1	C	13372235	CG	0.08	0.09	0	0.08	0.03	0.09	0.06	0.06	0.03	0.06	0.04	0	0	0	0.07
chr1	G	13372236	CG	0.02	0.04	0.04	0.03	0.05	0.12	0.04	0.01	0.01	0.02	0.05	0.01	0	0.08	0.05
chr1	C	13372242	CG	0.02	0	0.02	0.02	0.01	0.02	0.01	0	0	0	0.02	0	0.03	0	0
chr1	G	13372304	CG	0	0.02	0	0.02	0	0	0.02	0	0	0.04	0	0	0	0	0.01
chr1	G	13372331	CG	0	0	0.01	0.03	0	0	0.01	0	0.01	0	0	0	0	0.03	0
chr1	G	13372333	CG	0.01	0.02	0	0	0	0.01	0.01	0	0.01	0.01	0	0	0	0	0.03
chr1	G	13372353	CG	0.11	0.05	0.03	0.03	0.01	0.07	0.03	0.05	0.04	0	0.12	0	0.04	0.08	0.02
chr1	C	13372756	CG	0.02	0.08	0.06	0.08	0.08	0.06	0.08	0.07	0.05	0.08	0.09	0.05	0.01	0.09	0.07
chr1	C	13372772	CG	0.01	0	0.01	0	0.01	0	0.01	0.01	0.02	0.02	0	0	0	0	0
chr1	G	13372773	CG	0.01	0.01	0.03	0.01	0	0	0	0.01	0	0.01	0	0	0	0	0
chr1	C	13372780	CG	0.01	0.01	0	0	0.01	0	0	0	0.01	0	0	0	0.01	0.01	0
[truncated: 870,417 more rows]
