# Supplementary material for: Dietary Restriction and Rapamycin Affect Brain Aging in Mice by Attenuating Age-Related DNA Methylation Changes
Source: Genes (Basel). 2022 Apr 15;13(4):699. doi: 10.3390/genes13040699 (PMC9030181; doi:10.3390/genes13040699)
Supplement: Supplementary file 1 [file genes-13-00699-s001.zip › Supplementary File S4 - Bin_locus_info.txt]

bin_ID	start	end
chr1_bin_5278	175625357	175625636
chr1_bin_5279	175634272	175634311
chr1_bin_17	3847814	3847814
chr1_bin_16	3819405	3819455
chr1_bin_15	3746874	3746874
chr1_bin_14	3670645	3671670
chr1_bin_13	3622136	3622341
chr1_bin_12	3584304	3584341
chr1_bin_11	3567542	3567542
chr1_bin_10	3509851	3509851
chr1_bin_5649	182982640	182982702
chr1_bin_5648	182975384	182975665
chr1_bin_5647	182969026	182969103
chr1_bin_5646	182957983	182958100
chr1_bin_5645	182926288	182926672
chr1_bin_5644	182892182	182892246
chr1_bin_5643	182878435	182878500
chr1_bin_5642	182873176	182873263
chr1_bin_5641	182865863	182866039
chr1_bin_5640	182864754	182864754
chr1_bin_1188	44285222	44285268
chr1_bin_1189	44304689	44304689
chr1_bin_1180	44005364	44005390
chr1_bin_1181	44043189	44043289
chr1_bin_1182	44101968	44102643
chr1_bin_1183	44119995	44120092
chr1_bin_1184	44147780	44148280
chr1_bin_1185	44198719	44198849
chr1_bin_1186	44203011	44203104
chr1_bin_1187	44267334	44267379
chr1_bin_4110	138840055	138840134
chr1_bin_4111	138841310	138842454
chr1_bin_4112	138847293	138848504
chr1_bin_4113	138856427	138856595
chr1_bin_4114	138871945	138872129
chr1_bin_4115	138910340	138910412
chr1_bin_4116	138950163	138950163
chr1_bin_3725	132983399	132983399
chr1_bin_4118	138988473	138988642
chr1_bin_4119	138990167	138990167
chr1_bin_3728	133045934	133046624
chr1_bin_3729	133067122	133067229
chr1_bin_1980	74404868	74404943
chr1_bin_1981	74415611	74415611
chr1_bin_1982	74418483	74418532
chr1_bin_1983	74423194	74423395
chr1_bin_1984	74427536	74427640
chr1_bin_1985	74482002	74482002
chr1_bin_1986	74505558	74506594
chr1_bin_1987	74570514	74571559
chr1_bin_1988	74579411	74579649
chr1_bin_1989	74587785	74588558
chr1_bin_3586	130854420	130854534
chr1_bin_3587	130878260	130878530
chr1_bin_3584	130824740	130824779
chr1_bin_3585	130831380	130831507
chr1_bin_3582	130717537	130717926
chr1_bin_3583	130732345	130732384
chr1_bin_3580	130614672	130614672
chr1_bin_3581	130680369	130680415
chr1_bin_3588	130903654	130903700
chr1_bin_3589	130920264	130920268
chr1_bin_2981	101049585	101049760
chr1_bin_2980	100998520	100998520
chr1_bin_2983	101210590	101210720
chr1_bin_2982	101178205	101178205
chr1_bin_2985	101336862	101336902
chr1_bin_2984	101233995	101233995
chr1_bin_2987	101411202	101411202
chr1_bin_2986	101374418	101374418
chr1_bin_2989	101460868	101460868
chr1_bin_2988	101420494	101420563
chr1_bin_2459	87326136	87327513
chr1_bin_2458	87309631	87309743
chr1_bin_2189	78776135	78776160
chr1_bin_2188	78723295	78723295
chr1_bin_2181	78523532	78523600
chr1_bin_2180	78515579	78515703
chr1_bin_2183	78590885	78590885
chr1_bin_2182	78588522	78588522
chr1_bin_2185	78615566	78615651
chr1_bin_2184	78601012	78601123
chr1_bin_2187	78695071	78695111
chr1_bin_2186	78657766	78658318
chr1_bin_2677	91122214	91122295
chr1_bin_2676	91082297	91082374
chr1_bin_2675	91078354	91078354
chr1_bin_2674	91072079	91072079
chr1_bin_2673	91068514	91068618
chr1_bin_2672	91064670	91064744
chr1_bin_2671	91052979	91053130
chr1_bin_2670	91032600	91032667
chr1_bin_2679	91145063	91145230
chr1_bin_2678	91128331	91128383
chr1_bin_19	3931004	3931004
chr1_bin_18	3852753	3852753
chr1_bin_5276	175601983	175602043
chr1_bin_5277	175608504	175608551
chr1_bin_5274	175585304	175585413
chr1_bin_5275	175592524	175592536
chr1_bin_5272	175487272	175487272
chr1_bin_5273	175492080	175492646
chr1_bin_5270	175345270	175345435
chr1_bin_5271	175396703	175396714
chr1_bin_1218	45587519	45587595
chr1_bin_1219	45612849	45612963
chr1_bin_1210	45173988	45173988
chr1_bin_1211	45186779	45186834
chr1_bin_1212	45205145	45205168
chr1_bin_1213	45227125	45227225
chr1_bin_1214	45237084	45237118
chr1_bin_1215	45315941	45316026
chr1_bin_1216	45459062	45459062
chr1_bin_1217	45502518	45502654
chr1_bin_4938	167228956	167229029
chr1_bin_4939	167230402	167230498
chr1_bin_4936	167062326	167062426
chr1_bin_4937	167197241	167197364
chr1_bin_4934	167000607	167001606
chr1_bin_4935	167013022	167013089
chr1_bin_4932	166955175	166955273
chr1_bin_4933	166998217	166998240
chr1_bin_4930	166923086	166923113
chr1_bin_4931	166933182	166933182
chr1_bin_1373	52749339	52749348
chr1_bin_1372	52745959	52745959
chr1_bin_1371	52726572	52727422
chr1_bin_1370	52708527	52708600
chr1_bin_1377	52817344	52817768
chr1_bin_1376	52765910	52765981
chr1_bin_1375	52761246	52761326
chr1_bin_1374	52757785	52757785
chr1_bin_1379	52939980	52940026
chr1_bin_1378	52844834	52845609
chr1_bin_3528	128264937	128264937
chr1_bin_3529	128296913	128296913
chr1_bin_3520	127854662	127854786
chr1_bin_3521	127880784	127880829
chr1_bin_4202	143208073	143208077
chr1_bin_4203	143234564	143234613
chr1_bin_3256	118012516	118012565
chr1_bin_4205	143308715	143308725
chr1_bin_5184	172271824	172271862
chr1_bin_5185	172278155	172278238
chr1_bin_5186	172292762	172292866
chr1_bin_5187	172311034	172311034
chr1_bin_5180	172218674	172218738
chr1_bin_5181	172222438	172222477
chr1_bin_5182	172245133	172245252
chr1_bin_5183	172265993	172266007
chr1_bin_4207	143474485	143474555
chr1_bin_5188	172315799	172315850
chr1_bin_5189	172318119	172318385
chr1_bin_3624	131582147	131582219
chr1_bin_3991	135959751	135959920
chr1_bin_2129	77031196	77031289
chr1_bin_3990	135943021	135943126
chr1_bin_4455	153566279	153566321
chr1_bin_2128	76995142	76995191
chr1_bin_3621	131544106	131544106
chr1_bin_4454	153549824	153549895
chr1_bin_3620	131525207	131527638
chr1_bin_4457	153578037	153578166
chr1_bin_5458	180442671	180442715
chr1_bin_5459	180463537	180463609
chr1_bin_5452	180409148	180409148
chr1_bin_5453	180420680	180420744
chr1_bin_5450	180403115	180403191
chr1_bin_5451	180406631	180406631
chr1_bin_5456	180433403	180433478
chr1_bin_5457	180437029	180437111
chr1_bin_5454	180421763	180422893
chr1_bin_5455	180426819	180426902
chr1_bin_4453	153536052	153536052
chr1_bin_4904	166131474	166131672
chr1_bin_4808	164275520	164275600
chr1_bin_2120	76592023	76592067
chr1_bin_2862	94481588	94481611
chr1_bin_2863	94730265	94730332
chr1_bin_2860	94260628	94261045
chr1_bin_2861	94295098	94295302
chr1_bin_2866	94857373	94857373
chr1_bin_2867	94943632	94943699
chr1_bin_2864	94770957	94771007
chr1_bin_2865	94806772	94806832
chr1_bin_2868	94988937	94989053
chr1_bin_2869	95094028	95094061
chr1_bin_658	32306712	32306712
chr1_bin_659	32317912	32318645
chr1_bin_654	31935935	31935935
chr1_bin_655	31966699	31966820
chr1_bin_656	32172703	32172914
chr1_bin_657	32265685	32265828
chr1_bin_650	31745845	31745963
chr1_bin_651	31840750	31840837
chr1_bin_652	31859480	31859581
chr1_bin_653	31922698	31922781
chr1_bin_3449	122856127	122856335
chr1_bin_3448	122740010	122740089
chr1_bin_3119	108189770	108189875
chr1_bin_3118	108172116	108172205
chr1_bin_4323	150743624	150743624
chr1_bin_3442	122357085	122357195
chr1_bin_3441	122283469	122283572
chr1_bin_3440	122086594	122086610
chr1_bin_3447	122711665	122711750
chr1_bin_3110	107391363	107391379
chr1_bin_4325	150993240	150993587
chr1_bin_3444	122390975	122391094
chr1_bin_478	23356003	23356009
chr1_bin_479	23377962	23378088
chr1_bin_2248	80537945	80537945
chr1_bin_2249	80586720	80586760
chr1_bin_2246	80383812	80383817
chr1_bin_471	23184731	23184731
chr1_bin_2244	80293572	80293572
chr1_bin_2245	80339920	80341446
chr1_bin_2242	80193797	80193797
chr1_bin_2243	80227575	80227628
chr1_bin_476	23344497	23344497
chr1_bin_2241	80183621	80183621
chr1_bin_5940	190022597	190022597
chr1_bin_386	19103102	19103274
chr1_bin_387	19104477	19104573
chr1_bin_384	19037386	19037386
chr1_bin_385	19096989	19097081
chr1_bin_382	18938123	18938123
chr1_bin_383	19009475	19009500
chr1_bin_380	18872453	18872500
chr1_bin_381	18927764	18927809
chr1_bin_388	19111161	19111269
chr1_bin_389	19122598	19122598
chr1_bin_5942	190068289	190068414
chr1_bin_79	6213415	6215203
chr1_bin_78	6163576	6164332
chr1_bin_5216	172527766	172527839
chr1_bin_5217	172529870	172529963
chr1_bin_5210	172495549	172496960
chr1_bin_5211	172498434	172498435
chr1_bin_5212	172499784	172501061
chr1_bin_5213	172513177	172513992
chr1_bin_71	5916135	5916333
chr1_bin_70	5849868	5850353
chr1_bin_73	5962037	5962037
chr1_bin_72	5917442	5917449
chr1_bin_5218	172532410	172532415
chr1_bin_74	5982243	5982571
chr1_bin_77	6151069	6151072
chr1_bin_76	6026853	6026899
chr1_bin_5665	183369036	183369609
chr1_bin_5664	183363959	183363959
chr1_bin_5667	183389464	183389575
chr1_bin_5666	183378008	183378008
chr1_bin_5661	183335240	183335335
chr1_bin_5660	183322748	183322748
chr1_bin_5663	183356716	183357406
chr1_bin_5662	183345080	183345350
chr1_bin_5669	183423456	183423475
chr1_bin_5668	183402714	183402812
chr1_bin_5439	180255921	180256288
chr1_bin_4136	139636727	139636849
chr1_bin_4137	139641145	139641349
chr1_bin_4134	139604148	139604148
chr1_bin_4135	139613511	139613650
chr1_bin_4132	139579934	139579985
chr1_bin_4133	139587363	139587512
chr1_bin_4130	139424170	139424262
chr1_bin_4131	139454750	139455513
chr1_bin_4138	139650107	139650204
chr1_bin_4139	139669784	139669943
chr1_bin_636	30834213	30834303
chr1_bin_2479	87840409	87840517
chr1_bin_2478	87811501	87811599
chr1_bin_2471	87648355	87648434
chr1_bin_2470	87620564	87620610
chr1_bin_2473	87667944	87668098
chr1_bin_2472	87665488	87665488
chr1_bin_2475	87755835	87756375
chr1_bin_2474	87734735	87734735
chr1_bin_2477	87808628	87808628
chr1_bin_2476	87785960	87786073
chr1_bin_3308	119022859	119022952
chr1_bin_3309	119047830	119048943
chr1_bin_3300	118870535	118870630
chr1_bin_3301	118873581	118873682
chr1_bin_3302	118897851	118897965
chr1_bin_3303	118953840	118953910
chr1_bin_3304	118956045	118956045
chr1_bin_3305	118974977	118975019
chr1_bin_3306	118984541	118984541
chr1_bin_3307	118991079	118991079
chr1_bin_2659	90954081	90954081
chr1_bin_2658	90927448	90927507
chr1_bin_2655	90856477	90856546
chr1_bin_2654	90833354	90833464
chr1_bin_2657	90914980	90915471
chr1_bin_2656	90858121	90858129
chr1_bin_2651	90813455	90813652
chr1_bin_2650	90810518	90810518
chr1_bin_2653	90826398	90826480
chr1_bin_2652	90822354	90822481
chr1_bin_1238	46641345	46641345
chr1_bin_1239	46711676	46711712
chr1_bin_1236	46501497	46501575
chr1_bin_1237	46620230	46620272
chr1_bin_1234	46449719	46449758
chr1_bin_1235	46473481	46473524
chr1_bin_1232	46383136	46383136
chr1_bin_1233	46424823	46425657
chr1_bin_1230	46306530	46306572
chr1_bin_1231	46313729	46313774
chr1_bin_2390	86106608	86107744
chr1_bin_567	27505980	27505980
chr1_bin_564	27281576	27281619
chr1_bin_565	27396018	27396018
chr1_bin_562	27207814	27207814
chr1_bin_563	27276524	27276660
chr1_bin_1359	52287916	52288655
chr1_bin_1358	52243179	52243179
chr1_bin_4484	153907991	153908040
chr1_bin_4485	153961800	153961800
chr1_bin_4482	153900042	153901508
chr1_bin_4483	153903054	153903122
chr1_bin_4480	153890142	153890296
chr1_bin_4481	153897948	153898048
chr1_bin_1351	51981483	51981557
chr1_bin_1350	51978634	51978688
chr1_bin_1353	52009126	52009218
chr1_bin_1352	51990061	51990180
chr1_bin_1355	52119333	52120092
chr1_bin_1354	52113802	52113952
chr1_bin_1357	52232225	52233167
chr1_bin_1356	52137444	52137516
chr1_bin_6004	191062372	191063292
chr1_bin_963	38284796	38285368
chr1_bin_6006	191097992	191098821
chr1_bin_6007	191108807	191108885
chr1_bin_966	38353384	38353384
chr1_bin_967	38359587	38359629
chr1_bin_6002	191025571	191026224
chr1_bin_6003	191049110	191049179
chr1_bin_1829	71175875	71175969
chr1_bin_1828	71152101	71152134
chr1_bin_1823	70853563	70853680
chr1_bin_1822	70839515	70839633
chr1_bin_1821	70710283	70710283
chr1_bin_1820	70356845	70356959
chr1_bin_1827	71102658	71103015
chr1_bin_1826	71043384	71043384
chr1_bin_1825	71017609	71017609
chr1_bin_1824	70992289	70992367
chr1_bin_3722	132937260	132937311
chr1_bin_3723	132938891	132939199
chr1_bin_3720	132921047	132921081
chr1_bin_3721	132928623	132928659
chr1_bin_3726	133024613	133025482
chr1_bin_3727	133038535	133038535
chr1_bin_3724	132964488	132964530
chr1_bin_4117	138963310	138964093
chr1_bin_3689	132538982	132539098
chr1_bin_3688	132532179	132532233
chr1_bin_3685	132518712	132518809
chr1_bin_3684	132517003	132517163
chr1_bin_3687	132529093	132529093
chr1_bin_3686	132525376	132525433
chr1_bin_3681	132477101	132477476
chr1_bin_3680	132465477	132465556
chr1_bin_3683	132515585	132515604
chr1_bin_3682	132513958	132514059
chr1_bin_4301	149877216	149877216
chr1_bin_4300	149871254	149871467
chr1_bin_3463	124858577	124858577
chr1_bin_4302	149954175	149954297
chr1_bin_3465	124910929	124910966
chr1_bin_4304	149981642	149981642
chr1_bin_4307	150111140	150111228
chr1_bin_3466	124922086	124922320
chr1_bin_4309	150162979	150162979
chr1_bin_3468	124972163	124972216
chr1_bin_5296	176078058	176078058
chr1_bin_2224	79776109	79776152
chr1_bin_2225	79792355	79792360
chr1_bin_2226	79858336	79858867
chr1_bin_2227	79870001	79870001
chr1_bin_2220	79740807	79740830
chr1_bin_2221	79759858	79760279
chr1_bin_2222	79761427	79761875
chr1_bin_2223	79763660	79763660
chr1_bin_5290	175920513	175920594
chr1_bin_2228	79923384	79923484
chr1_bin_2229	79939380	79939380
chr1_bin_5291	175936352	175936380
chr1_bin_5292	175943231	175943277
chr1_bin_5293	175988477	175988693
chr1_bin_676	33469747	33469748
chr1_bin_677	33529923	33529969
chr1_bin_674	33461956	33462010
chr1_bin_675	33465013	33465084
chr1_bin_672	33402856	33402895
chr1_bin_673	33406803	33408246
chr1_bin_670	33305555	33305773
chr1_bin_671	33371174	33371302
chr1_bin_678	33556368	33556461
chr1_bin_679	33632130	33632130
chr1_bin_452	21988526	21988556
chr1_bin_453	22061485	22061504
chr1_bin_450	21588861	21588918
chr1_bin_907	37186639	37186639
chr1_bin_456	22210867	22210970
chr1_bin_901	37070494	37070494
chr1_bin_454	22092399	22092503
chr1_bin_455	22129584	22129726
chr1_bin_458	22238124	22238221
chr1_bin_459	22296903	22296992
chr1_bin_908	37218771	37218877
chr1_bin_909	37222340	37222340
chr1_bin_53	5272919	5272943
chr1_bin_52	5189375	5189554
chr1_bin_51	5184470	5184540
chr1_bin_50	5175456	5175569
chr1_bin_57	5380706	5380706
chr1_bin_56	5350787	5350824
chr1_bin_55	5320478	5320571
chr1_bin_54	5275300	5275321
chr1_bin_5232	172632552	172634026
chr1_bin_5233	172659119	172659119
chr1_bin_59	5430445	5430468
chr1_bin_5943	190129022	190129022
chr1_bin_5944	190137536	190137644
chr1_bin_5237	172902390	172902491
chr1_bin_5234	172669649	172669649
chr1_bin_5235	172672251	172672358
chr1_bin_4549	155531570	155531659
chr1_bin_4548	155524077	155524201
chr1_bin_4543	155439479	155439608
chr1_bin_4542	155422142	155422252
chr1_bin_4541	155416820	155417498
chr1_bin_4540	155325091	155325185
chr1_bin_4547	155521780	155521850
chr1_bin_4546	155517270	155517270
chr1_bin_4545	155490475	155490598
chr1_bin_4544	155444184	155444285
chr1_bin_4158	140910097	140910097
chr1_bin_4159	140922340	140922340
chr1_bin_4154	140794679	140794743
chr1_bin_4155	140797486	140797535
chr1_bin_4156	140860650	140860829
chr1_bin_4157	140889422	140889422
chr1_bin_4150	140302472	140303440
chr1_bin_4151	140318073	140318082
chr1_bin_4152	140722972	140723161
chr1_bin_4153	140772542	140772588
chr1_bin_3098	107004653	107004653
chr1_bin_3099	107008811	107008811
chr1_bin_3090	106795984	106796623
chr1_bin_3091	106800579	106800579
chr1_bin_3092	106802744	106803665
chr1_bin_3093	106875958	106875958
chr1_bin_3094	106921356	106921469
chr1_bin_3095	106923083	106923083
chr1_bin_3096	106973320	106973326
chr1_bin_3097	106977801	106977801
chr1_bin_2419	86525109	86528567
chr1_bin_2418	86504009	86504259
chr1_bin_2417	86502376	86502459
chr1_bin_2416	86487365	86487667
chr1_bin_2415	86480913	86480979
chr1_bin_2414	86471956	86471956
chr1_bin_2413	86467624	86467722
chr1_bin_2412	86462795	86462837
chr1_bin_2411	86445456	86445657
chr1_bin_2410	86442021	86443034
chr1_bin_3328	119264235	119264264
chr1_bin_3329	119289948	119290546
chr1_bin_3326	119255451	119255686
chr1_bin_3327	119256966	119257067
chr1_bin_3324	119234690	119234767
chr1_bin_3325	119238632	119238739
chr1_bin_3322	119203674	119203802
chr1_bin_3323	119219812	119219819
chr1_bin_3320	119184002	119184157
chr1_bin_3321	119197358	119197471
chr1_bin_1788	68469098	68469553
chr1_bin_1789	68570211	68570211
chr1_bin_1786	68401336	68401336
chr1_bin_1787	68406066	68406082
chr1_bin_1784	68309581	68309667
chr1_bin_1785	68385950	68385994
chr1_bin_1782	68150391	68150439
chr1_bin_1783	68268313	68268336
chr1_bin_1780	67884418	67884543
chr1_bin_1781	67889637	67889637
chr1_bin_1254	47207769	47207816
chr1_bin_1255	47227607	47227644
chr1_bin_1256	47366090	47366090
chr1_bin_1257	47371610	47371633
chr1_bin_1250	47097038	47097038
chr1_bin_1251	47125884	47125926
chr1_bin_1252	47149487	47149523
chr1_bin_1253	47181280	47181398
chr1_bin_1258	47453338	47453338
chr1_bin_1259	47456733	47456767
chr1_bin_2450	87210285	87210361
chr1_bin_2457	87293854	87293854
chr1_bin_2456	87287036	87287125
chr1_bin_4978	167743255	167743332
chr1_bin_4979	167757576	167757615
chr1_bin_2455	87275128	87275242
chr1_bin_4972	167669928	167670922
chr1_bin_4973	167688339	167689132
chr1_bin_4970	167638918	167638992
chr1_bin_4971	167640830	167640830
chr1_bin_4976	167693672	167693782
chr1_bin_4977	167698819	167698931
chr1_bin_4974	167690198	167690395
chr1_bin_4975	167692130	167692431
chr1_bin_3450	122911882	122911968
chr1_bin_1339	51630821	51630821
chr1_bin_1338	51598561	51598561
chr1_bin_1337	51551685	51551802
chr1_bin_1336	51493896	51493896
chr1_bin_1335	51487531	51487551
chr1_bin_1334	51477867	51478621
chr1_bin_1333	51459472	51459569
chr1_bin_1332	51433797	51433831
chr1_bin_1331	51426514	51426597
chr1_bin_1330	51318450	51318456
chr1_bin_3453	123646045	123646120
chr1_bin_4334	151205961	151205961
chr1_bin_4335	151227570	151227665
chr1_bin_3456	124045835	124045894
chr1_bin_3457	124196138	124196184
chr1_bin_469	22997563	22997599
chr1_bin_468	22933969	22933969
chr1_bin_391	19214306	19214350
chr1_bin_390	19209898	19211212
chr1_bin_393	19233791	19234191
chr1_bin_392	19227557	19227557
chr1_bin_395	19259145	19259164
chr1_bin_394	19237137	19237216
chr1_bin_397	19378480	19378526
chr1_bin_396	19292409	19292471
chr1_bin_5140	171503555	171503876
chr1_bin_5141	171508550	171508638
chr1_bin_5142	171514261	171514306
chr1_bin_5143	171518831	171518876
chr1_bin_5144	171550750	171550750
chr1_bin_5145	171561992	171562056
chr1_bin_5146	171606785	171606785
chr1_bin_5147	171645456	171645531
chr1_bin_5148	171682865	171682865
chr1_bin_5149	171734881	171735161
chr1_bin_1801	69468761	69468816
chr1_bin_1800	69464712	69464804
chr1_bin_1803	69597737	69597737
chr1_bin_1802	69545399	69545518
chr1_bin_1805	69605469	69605493
chr1_bin_1804	69601923	69601923
chr1_bin_1807	69677453	69677646
chr1_bin_1806	69670283	69670370
chr1_bin_1809	69687373	69687914
chr1_bin_1808	69680564	69680564
chr1_bin_4900	166106095	166106169
chr1_bin_5496	180904283	180904875
chr1_bin_5497	180906357	180906461
chr1_bin_5494	180894727	180894956
chr1_bin_5495	180903132	180903133
chr1_bin_5492	180850634	180851311
chr1_bin_5493	180872037	180872152
chr1_bin_5490	180839962	180840079
chr1_bin_5491	180841763	180841875
chr1_bin_5498	180913065	180913187
chr1_bin_5499	180929079	180929146
chr1_bin_3663	132295508	132295626
chr1_bin_3662	132284933	132284969
chr1_bin_3661	132233772	132233881
chr1_bin_3660	132229183	132229336
chr1_bin_3667	132330246	132331670
chr1_bin_3666	132310874	132310949
chr1_bin_3665	132307639	132307683
chr1_bin_3664	132298095	132299338
chr1_bin_3669	132345615	132345695
chr1_bin_3668	132335510	132335570
chr1_bin_3407	120971282	120971323
chr1_bin_3406	120803292	120803292
chr1_bin_3405	120735774	120735969
chr1_bin_3404	120698909	120699024
chr1_bin_3403	120644285	120644388
chr1_bin_3402	120634205	120634205
chr1_bin_3401	120628817	120628914
chr1_bin_3400	120625360	120625384
chr1_bin_3409	120987614	120987614
chr1_bin_3408	120978118	120978118
chr1_bin_610	30085880	30085996
chr1_bin_611	30087217	30087306
chr1_bin_612	30090067	30090115
chr1_bin_613	30248522	30248522
chr1_bin_614	30274737	30274783
chr1_bin_615	30291495	30291500
chr1_bin_616	30310958	30310974
chr1_bin_617	30328960	30328960
chr1_bin_618	30333295	30333340
chr1_bin_619	30358325	30358325
chr1_bin_6048	191898557	191898629
chr1_bin_6049	191906526	191907507
chr1_bin_6040	191613195	191613330
chr1_bin_6041	191615807	191615807
chr1_bin_6042	191631926	191632028
chr1_bin_6043	191648957	191649044
chr1_bin_6044	191718106	191719073
chr1_bin_6045	191820958	191822042
chr1_bin_6046	191836264	191837210
chr1_bin_6047	191850353	191850353
chr1_bin_2758	92594676	92594799
chr1_bin_2759	92615784	92615840
chr1_bin_2208	79450635	79450727
chr1_bin_2209	79479453	79479502
chr1_bin_928	37551651	37551751
chr1_bin_929	37571352	37571456
chr1_bin_926	37540755	37541223
chr1_bin_927	37546673	37547628
chr1_bin_924	37492933	37493001
chr1_bin_925	37517232	37517280
chr1_bin_922	37454855	37454978
chr1_bin_923	37456065	37456065
chr1_bin_920	37390761	37390809
chr1_bin_921	37429960	37430286
chr1_bin_5968	190440995	190441049
chr1_bin_5969	190448381	190448438
chr1_bin_5966	190409227	190409227
chr1_bin_5967	190417499	190417643
chr1_bin_5964	190390181	190390636
chr1_bin_5965	190392020	190392111
chr1_bin_5962	190333245	190333413
chr1_bin_5963	190384693	190384731
chr1_bin_5960	190287891	190287919
chr1_bin_5961	190326878	190326886
chr1_bin_4561	155729229	155729275
chr1_bin_4560	155724717	155724736
chr1_bin_4563	155741237	155743158
chr1_bin_4562	155736839	155737965
chr1_bin_4565	155765129	155765272
chr1_bin_4564	155747041	155747089
chr1_bin_4567	155778643	155778727
chr1_bin_4566	155769899	155770067
chr1_bin_4569	155812738	155812935
chr1_bin_4568	155786661	155786781
chr1_bin_4172	141546239	141546351
chr1_bin_4173	141548415	141548415
chr1_bin_4170	141336624	141336666
chr1_bin_4171	141389065	141389185
chr1_bin_4176	141683327	141683507
chr1_bin_4177	141797806	141797869
chr1_bin_4174	141631497	141631497
chr1_bin_4175	141636660	141636752
chr1_bin_4178	141867318	141867442
chr1_bin_4179	141992739	141992739
chr1_bin_5779	186413447	186413553
chr1_bin_5778	186394724	186394837
chr1_bin_5773	186083249	186083677
chr1_bin_5772	185945930	185946003
chr1_bin_5771	185922399	185922464
chr1_bin_5770	185794127	185794127
chr1_bin_5777	186293114	186293188
chr1_bin_5776	186243319	186243398
chr1_bin_5775	186240905	186241014
chr1_bin_5774	186239517	186239618
chr1_bin_2923	97976990	97977154
chr1_bin_2434	87085820	87085820
chr1_bin_2921	97865703	97865737
chr1_bin_2436	87088829	87089203
chr1_bin_2431	86703810	86704300
chr1_bin_2430	86674257	86674306
chr1_bin_2433	87048732	87048812
chr1_bin_2432	86909306	86909347
chr1_bin_2929	98288378	98288407
chr1_bin_2928	98255527	98255527
chr1_bin_2439	87147890	87147890
chr1_bin_2438	87127806	87127871
chr1_bin_3344	119465496	119465496
chr1_bin_3345	119482122	119482789
chr1_bin_3346	119487908	119488028
chr1_bin_3347	119495688	119495814
chr1_bin_3340	119420679	119422693
chr1_bin_3341	119428226	119428226
chr1_bin_3342	119430967	119431007
chr1_bin_3343	119443809	119443893
chr1_bin_3348	119504424	119504986
chr1_bin_3349	119525826	119526402
chr1_bin_2699	91365019	91366648
chr1_bin_2698	91354253	91354310
chr1_bin_2691	91322027	91322093
chr1_bin_2690	91320775	91320831
chr1_bin_2693	91336590	91336590
chr1_bin_2692	91334320	91335177
chr1_bin_2695	91340325	91340440
chr1_bin_2694	91338607	91338622
chr1_bin_2697	91344507	91345424
chr1_bin_2696	91342559	91342653
chr1_bin_557	27126473	27126670
chr1_bin_556	27092799	27092884
chr1_bin_555	27056429	27056545
chr1_bin_554	27032553	27032650
chr1_bin_553	26995624	26995742
chr1_bin_552	26985887	26986060
chr1_bin_551	26889485	26889485
chr1_bin_550	26847206	26847206
chr1_bin_5263	174838065	174838177
chr1_bin_559	27136959	27137004
chr1_bin_558	27131839	27131892
chr1_bin_69	5829069	5829133
chr1_bin_62	5589215	5589305
chr1_bin_63	5649429	5649429
chr1_bin_1278	48656784	48656830
chr1_bin_1279	48673444	48673574
chr1_bin_1272	47979380	47979452
chr1_bin_1273	48132556	48132556
chr1_bin_1270	47960324	47960370
chr1_bin_1271	47969493	47969553
chr1_bin_1276	48413422	48413654
chr1_bin_1277	48519609	48519609
chr1_bin_1274	48353895	48353935
chr1_bin_1275	48368568	48368617
chr1_bin_4990	168048769	168048884
chr1_bin_6134	195341641	195341970
chr1_bin_4992	168127941	168127941
chr1_bin_4993	168139162	168139162
chr1_bin_4994	168197236	168197236
chr1_bin_4995	168203368	168203497
chr1_bin_4996	168214918	168215015
chr1_bin_6135	195346027	195346127
chr1_bin_4998	168262240	168262317
chr1_bin_4999	168309117	168309225
chr1_bin_6136	195357066	195357107
chr1_bin_1315	50330120	50330120
chr1_bin_1314	50230374	50230374
chr1_bin_1317	50540222	50540222
chr1_bin_6137	195366070	195366126
chr1_bin_1311	50065539	50065539
chr1_bin_1310	50057616	50057616
chr1_bin_1313	50159886	50160033
chr1_bin_1312	50107665	50107665
chr1_bin_584	28356989	28357044
chr1_bin_1319	50771163	50771163
chr1_bin_1318	50721431	50721479
chr1_bin_585	28390603	28390645
chr1_bin_6132	195300427	195300448
chr1_bin_587	28458580	28458676
chr1_bin_4450	153506423	153506423
chr1_bin_589	28889450	28889528
chr1_bin_3458	124301315	124301407
chr1_bin_3539	128550284	128550359
chr1_bin_4218	143776716	143778009
chr1_bin_3612	131248958	131248969
chr1_bin_3613	131258799	131258799
chr1_bin_4642	157704159	157704253
chr1_bin_3533	128439653	128440796
chr1_bin_4643	157722021	157722121
chr1_bin_3532	128416803	128417130
chr1_bin_3964	135720463	135720535
chr1_bin_4211	143582518	143582606
chr1_bin_3965	135729069	135729289
chr1_bin_5166	172026668	172027431
chr1_bin_5167	172048468	172048621
chr1_bin_5164	172014896	172014944
chr1_bin_5165	172023579	172023643
chr1_bin_5162	172009697	172009733
chr1_bin_5163	172012905	172013093
chr1_bin_5160	172001829	172001945
chr1_bin_5161	172007920	172007935
chr1_bin_4217	143745908	143746001
chr1_bin_3615	131275269	131275895
chr1_bin_5168	172053694	172054135
chr1_bin_5169	172061512	172061512
chr1_bin_3968	135743972	135744058
chr1_bin_3243	117621898	117621982
chr1_bin_3969	135746843	135746945
chr1_bin_5231	172617631	172617734
chr1_bin_3534	128456973	128457104
chr1_bin_1867	72238250	72238355
chr1_bin_1866	72236405	72236505
chr1_bin_1865	72233109	72233193
chr1_bin_1864	72221979	72222107
chr1_bin_1863	72211798	72212381
chr1_bin_1862	72198169	72198947
chr1_bin_1861	72196955	72196955
chr1_bin_1860	72184216	72184216
chr1_bin_1869	72264812	72264908
chr1_bin_1868	72254558	72254807
chr1_bin_2118	76480572	76480572
chr1_bin_4812	164315250	164315370
chr1_bin_2112	76071052	76071113
chr1_bin_2113	76179710	76179795
chr1_bin_3649	132053622	132053622
chr1_bin_3648	132046498	132046552
chr1_bin_3641	131953679	131954273
chr1_bin_3640	131910955	131911200
chr1_bin_3643	131971120	131971318
chr1_bin_3642	131963072	131963751
chr1_bin_3645	131987501	131987629
chr1_bin_3644	131976980	131978016
chr1_bin_3647	132020083	132020102
chr1_bin_3646	132007463	132008412
chr1_bin_4697	160308805	160308965
chr1_bin_4696	160233325	160233325
chr1_bin_4695	160212353	160213044
chr1_bin_4694	160195224	160195307
chr1_bin_4693	160147524	160147631
chr1_bin_4692	160122637	160122637
chr1_bin_4691	160114527	160114685
chr1_bin_4690	160044361	160044703
chr1_bin_4699	160377465	160377550
chr1_bin_4698	160335062	160335172
chr1_bin_3429	121662720	121662723
chr1_bin_4348	151562765	151562844
chr1_bin_3425	121567633	121567706
chr1_bin_3424	121469928	121469928
chr1_bin_3427	121584650	121584650
chr1_bin_3426	121571471	121571520
chr1_bin_3421	121431190	121431769
chr1_bin_4340	151336132	151336132
chr1_bin_3423	121455963	121456087
chr1_bin_4342	151428181	151428342
chr1_bin_1485	57377508	57377888
chr1_bin_1484	57370426	57370426
chr1_bin_1487	57421734	57421825
chr1_bin_1486	57406219	57406816
chr1_bin_1481	57312333	57312333
chr1_bin_1480	57308713	57308784
chr1_bin_1483	57357121	57357121
chr1_bin_1482	57327810	57327810
chr1_bin_1489	57445919	57446052
chr1_bin_1488	57442890	57442890
chr1_bin_2598	89932615	89932800
chr1_bin_639	30948878	30950216
chr1_bin_632	30728589	30728589
chr1_bin_633	30730737	30730772
chr1_bin_630	30689820	30690009
chr1_bin_631	30717563	30717563
chr1_bin_2596	89928924	89928995
chr1_bin_2597	89930083	89931590
chr1_bin_2594	89911589	89912038
chr1_bin_635	30771659	30771760
chr1_bin_496	23919213	23919383
chr1_bin_497	23921844	23922603
chr1_bin_494	23827084	23827155
chr1_bin_495	23834632	23834767
chr1_bin_492	23761845	23763037
chr1_bin_493	23790560	23790560
chr1_bin_490	23730162	23730162
chr1_bin_491	23746485	23746574
chr1_bin_6066	192193444	192193556
chr1_bin_6067	192266893	192267016
chr1_bin_6064	192154653	192154695
chr1_bin_6065	192190671	192190949
chr1_bin_6062	192092230	192092600
chr1_bin_6063	192136689	192138537
chr1_bin_6060	192057005	192057098
chr1_bin_6061	192085448	192085563
chr1_bin_948	37877890	37877987
chr1_bin_949	37890460	37890552
chr1_bin_2778	92885388	92885504
chr1_bin_2779	92907475	92907665
chr1_bin_940	37717655	37717761
chr1_bin_941	37719606	37719926
chr1_bin_2774	92861341	92861408
chr1_bin_943	37764877	37764907
chr1_bin_2772	92855858	92855968
chr1_bin_945	37784093	37784136
chr1_bin_2770	92848837	92848953
chr1_bin_947	37864613	37865287
chr1_bin_97	7293656	7293702
chr1_bin_96	7287879	7287941
chr1_bin_95	7271998	7272068
chr1_bin_94	7242380	7242581
chr1_bin_93	7236986	7237201
chr1_bin_92	7153642	7153756
chr1_bin_91	7088594	7089096
chr1_bin_90	7057500	7057511
chr1_bin_99	7306547	7307329
chr1_bin_98	7302098	7302132
chr1_bin_5904	189727508	189728765
chr1_bin_5905	189730593	189730598
chr1_bin_5906	189737291	189737783
chr1_bin_5907	189738879	189738989
chr1_bin_5900	189688010	189688254
chr1_bin_5901	189696331	189696427
chr1_bin_5902	189714213	189714213
chr1_bin_5903	189722283	189722405
chr1_bin_5908	189749775	189749832
chr1_bin_5909	189759170	189759849
chr1_bin_4507	154651461	154651461
chr1_bin_4506	154600881	154600881
chr1_bin_4505	154580221	154580221
chr1_bin_4504	154565357	154565357
chr1_bin_4503	154559831	154559880
chr1_bin_4502	154488271	154488445
chr1_bin_4501	154427233	154427233
chr1_bin_4500	154385783	154385783
chr1_bin_4509	154725741	154725813
chr1_bin_4508	154722560	154722560
chr1_bin_1100	40736996	40736996
chr1_bin_1101	40755721	40755812
chr1_bin_1102	40767836	40767961
chr1_bin_1103	40790469	40790596
chr1_bin_1104	40804386	40804490
chr1_bin_1105	40827495	40827599
chr1_bin_1106	40832198	40832198
chr1_bin_1107	40833652	40833748
chr1_bin_1108	40835861	40835943
chr1_bin_1109	40840850	40840916
chr1_bin_5751	185332109	185332207
chr1_bin_5750	185328945	185329438
chr1_bin_5753	185362988	185363544
chr1_bin_5752	185354694	185354739
chr1_bin_5755	185454798	185455703
chr1_bin_5754	185438903	185438998
chr1_bin_5757	185516361	185516361
chr1_bin_5756	185514876	185514876
chr1_bin_5759	185594003	185594003
chr1_bin_5758	185552527	185552620
chr1_bin_2909	97337841	97337841
chr1_bin_2908	97279612	97279641
chr1_bin_2901	96749297	96749356
chr1_bin_2900	96699398	96699458
chr1_bin_2903	96969178	96969270
chr1_bin_2902	96872227	96872379
chr1_bin_2905	97121200	97121284
chr1_bin_2904	96997364	96997469
chr1_bin_2907	97174059	97174100
chr1_bin_2906	97151859	97151948
chr1_bin_795	35928509	35928609
chr1_bin_794	35890325	35890394
chr1_bin_797	35991318	35991438
chr1_bin_796	35974005	35974210
chr1_bin_791	35763481	35763587
chr1_bin_790	35742583	35742583
chr1_bin_793	35858132	35858331
chr1_bin_792	35850944	35851051
chr1_bin_799	36008579	36008700
chr1_bin_798	36001229	36001290
chr1_bin_571	27728118	27728289
chr1_bin_570	27614151	27614151
chr1_bin_573	27732600	27732644
chr1_bin_572	27731015	27731036
chr1_bin_575	27844922	27845028
chr1_bin_574	27753987	27753987
chr1_bin_577	28024184	28024290
chr1_bin_576	27979439	27979709
chr1_bin_579	28134964	28134978
chr1_bin_578	28033205	28033252
chr1_bin_3368	120043547	120043654
chr1_bin_3369	120045078	120045184
chr1_bin_3362	119965963	119966046
chr1_bin_3363	119979969	119979969
chr1_bin_3360	119912960	119913169
chr1_bin_3361	119956507	119956596
chr1_bin_3366	120009737	120009737
chr1_bin_3367	120011677	120011787
chr1_bin_3364	119996768	119997385
chr1_bin_3365	120007278	120007677
chr1_bin_2019	74925866	74925970
chr1_bin_2018	74903929	74905039
chr1_bin_2013	74880861	74880940
chr1_bin_2012	74877610	74877755
chr1_bin_2011	74858370	74859350
chr1_bin_2010	74853907	74856259
chr1_bin_2017	74900532	74901128
chr1_bin_2016	74892805	74892868
chr1_bin_2015	74884573	74885438
chr1_bin_2014	74882063	74882601
chr1_bin_1290	49011048	49011048
chr1_bin_1291	49016352	49016352
chr1_bin_1292	49073026	49073026
chr1_bin_1293	49270426	49270516
chr1_bin_1294	49274746	49274746
chr1_bin_1295	49322640	49324337
chr1_bin_1296	49327568	49327629
chr1_bin_1297	49419800	49419922
chr1_bin_1298	49458843	49458932
chr1_bin_1299	49477431	49477541
chr1_bin_513	24496920	24496965
chr1_bin_512	24419272	24419361
chr1_bin_511	24389073	24389172
chr1_bin_510	24385669	24385795
chr1_bin_517	24648471	24648586
chr1_bin_516	24645962	24646001
chr1_bin_2385	85991428	85991544
chr1_bin_514	24584765	24584765
chr1_bin_5108	171240536	171240649
chr1_bin_5109	171247041	171247234
chr1_bin_5104	171221789	171222906
chr1_bin_5105	171225612	171225697
chr1_bin_5106	171237093	171237197
chr1_bin_5107	171238648	171238751
chr1_bin_5100	171193051	171193313
chr1_bin_5101	171195898	171196240
chr1_bin_5102	171216773	171217680
chr1_bin_5103	171219352	171219423
chr1_bin_999	38835937	38836676
chr1_bin_998	38830121	38830240
chr1_bin_1665	63183548	63183630
chr1_bin_4451	153525453	153525489
chr1_bin_6019	191277762	191277807
chr1_bin_6018	191259030	191259138
chr1_bin_3735	133103561	133103816
chr1_bin_4102	138617453	138619809
chr1_bin_4101	138593067	138593067
chr1_bin_4100	138560702	138560729
chr1_bin_3731	133086037	133087025
chr1_bin_3730	133084055	133084148
chr1_bin_3999	136067694	136067694
chr1_bin_3998	136050847	136051116
chr1_bin_3629	131711712	131711720
chr1_bin_3628	131680740	131680790
chr1_bin_3627	131647247	131647268
chr1_bin_3626	131614290	131614405
chr1_bin_3625	131600062	131600135
chr1_bin_3996	136034900	136034900
chr1_bin_3623	131573875	131574061
chr1_bin_3622	131546912	131546973
chr1_bin_3993	135997553	135997778
chr1_bin_3992	135981173	135981197
chr1_bin_1849	71870112	71870223
chr1_bin_1848	71709966	71710107
chr1_bin_1845	71648318	71648383
chr1_bin_1844	71645634	71645679
chr1_bin_1847	71652901	71653325
chr1_bin_1846	71650983	71651081
chr1_bin_1841	71603632	71603801
chr1_bin_1840	71599497	71599604
chr1_bin_1843	71629244	71629479
chr1_bin_1842	71609492	71609594
chr1_bin_3195	113763212	113763296
chr1_bin_3194	113750556	113750803
chr1_bin_3197	113903962	113903976
chr1_bin_3196	113815639	113816377
chr1_bin_3191	113516426	113516479
chr1_bin_3190	113051269	113051288
chr1_bin_3193	113682151	113682172
chr1_bin_3192	113608958	113609008
chr1_bin_3199	114230020	114230244
chr1_bin_3198	114134447	114134701
chr1_bin_5287	175878142	175878245
chr1_bin_5286	175858287	175858446
chr1_bin_5285	175816963	175816963
chr1_bin_5284	175790041	175790041
chr1_bin_5283	175749692	175749785
chr1_bin_5282	175692465	175693069
chr1_bin_5281	175676743	175676847
chr1_bin_5280	175648882	175649009
chr1_bin_2570	89718180	89718298
chr1_bin_2571	89724608	89724715
chr1_bin_2572	89739069	89739137
chr1_bin_2573	89750970	89751083
chr1_bin_2574	89762609	89762699
chr1_bin_2575	89772280	89772383
chr1_bin_2576	89782094	89782094
chr1_bin_2577	89783401	89783401
chr1_bin_2578	89786722	89786795
chr1_bin_2579	89789149	89789249
chr1_bin_962	38267256	38268332
chr1_bin_6005	191095244	191095359
chr1_bin_960	38210546	38210665
chr1_bin_961	38233126	38233126
chr1_bin_6000	190993292	190993374
chr1_bin_6001	190995620	190995669
chr1_bin_964	38315411	38315528
chr1_bin_965	38325762	38325789
chr1_bin_968	38368187	38368290
chr1_bin_969	38385018	38385018
chr1_bin_6008	191125697	191126263
chr1_bin_6009	191133667	191133764
chr1_bin_2714	91518739	91518905
chr1_bin_2715	91527135	91527196
chr1_bin_2716	91540721	91540984
chr1_bin_2717	91554340	91554437
chr1_bin_2710	91459210	91459667
chr1_bin_2711	91494480	91495494
chr1_bin_2712	91499600	91499677
chr1_bin_2713	91501137	91501339
chr1_bin_2718	91595434	91595987
chr1_bin_2719	91611544	91612220
chr1_bin_5928	189913283	189913387
chr1_bin_5929	189922169	189922575
chr1_bin_5298	176275201	176275511
chr1_bin_5299	176583624	176583624
chr1_bin_5294	175993356	175993479
chr1_bin_5295	176007597	176007699
chr1_bin_5920	189863300	189863328
chr1_bin_5297	176223996	176224051
chr1_bin_5926	189892872	189892948
chr1_bin_5927	189896489	189896489
chr1_bin_5924	189886419	189886579
chr1_bin_5925	189890111	189890203
chr1_bin_214	12457740	12457942
chr1_bin_215	12470422	12470422
chr1_bin_216	12498569	12498774
chr1_bin_217	12515736	12515736
chr1_bin_210	12264888	12264930
chr1_bin_211	12270029	12270073
chr1_bin_212	12313837	12313873
chr1_bin_213	12344892	12344982
chr1_bin_218	12565846	12565901
chr1_bin_219	12668443	12668477
chr1_bin_4529	155086652	155086692
chr1_bin_4528	155082684	155083509
chr1_bin_4525	155031354	155032086
chr1_bin_4524	155029254	155029298
chr1_bin_4527	155069676	155069681
chr1_bin_4526	155051836	155051923
chr1_bin_4521	155009054	155009157
chr1_bin_4520	155006632	155006741
chr1_bin_4523	155023499	155023624
chr1_bin_4522	155010383	155010407
chr1_bin_1126	41896876	41896923
chr1_bin_1127	42080451	42080451
chr1_bin_1124	41474863	41474863
chr1_bin_1125	41762022	41762078
chr1_bin_1122	41426030	41426030
chr1_bin_1123	41462754	41462824
chr1_bin_1120	41333782	41333942
chr1_bin_1121	41343238	41343321
chr1_bin_1128	42099033	42099171
chr1_bin_1129	42242514	42242591
chr1_bin_223	12795553	12795553
chr1_bin_222	12730287	12730287
chr1_bin_5312	176956484	176956561
chr1_bin_229	12976139	12976139
chr1_bin_228	12971880	12971976
chr1_bin_5737	185068417	185068491
chr1_bin_5736	185044022	185044022
chr1_bin_5735	184999332	185000134
chr1_bin_5734	184958710	184958745
chr1_bin_5733	184905440	184905499
chr1_bin_5732	184902968	184903083
chr1_bin_5731	184882294	184883166
chr1_bin_5730	184874847	184874947
chr1_bin_5739	185142810	185142810
chr1_bin_5738	185095076	185095286
chr1_bin_2969	100575058	100575143
chr1_bin_2968	100559740	100559786
chr1_bin_2967	100531233	100531254
chr1_bin_2966	100418353	100418353
chr1_bin_2965	100320254	100320715
chr1_bin_2964	100302790	100302873
chr1_bin_2963	100291722	100291800
chr1_bin_2962	100231775	100231775
chr1_bin_2961	100226359	100226359
chr1_bin_2960	99887329	99887357
chr1_bin_779	35416109	35416109
chr1_bin_778	35414145	35414190
chr1_bin_777	35304720	35304720
chr1_bin_776	35271662	35271662
chr1_bin_775	35260994	35261103
chr1_bin_774	35214042	35215000
chr1_bin_773	35210878	35210948
chr1_bin_772	35060599	35060716
chr1_bin_771	35048824	35048852
chr1_bin_770	35013281	35013403
chr1_bin_3977	135797053	135797169
chr1_bin_4068	136946472	136949726
chr1_bin_4069	136952989	136953823
chr1_bin_4060	136828579	136828674
chr1_bin_4061	136839230	136839264
chr1_bin_4062	136842818	136842928
chr1_bin_4063	136862048	136862048
chr1_bin_4064	136869700	136869814
chr1_bin_4065	136871513	136871625
chr1_bin_4066	136907817	136907839
chr1_bin_4067	136912419	136912504
chr1_bin_519	24707889	24708003
chr1_bin_518	24678612	24678742
chr1_bin_2383	85935807	85935876
chr1_bin_2382	85933710	85933710
chr1_bin_2381	85908277	85908334
chr1_bin_2380	85906783	85906859
chr1_bin_2387	86037775	86037802
chr1_bin_2386	86018092	86018703
chr1_bin_515	24586534	24587392
chr1_bin_2384	85979673	85979743
chr1_bin_1720	65176349	65176349
chr1_bin_1721	65179028	65179107
chr1_bin_1722	65186617	65186910
chr1_bin_1723	65277818	65277921
chr1_bin_1724	65311765	65311867
chr1_bin_1725	65358506	65358733
chr1_bin_1726	65361020	65361062
chr1_bin_1727	65418133	65418133
chr1_bin_1728	65439016	65439112
chr1_bin_1729	65526571	65526676
chr1_bin_3380	120197287	120197385
chr1_bin_3381	120218190	120218190
chr1_bin_3382	120235595	120235634
chr1_bin_3383	120265241	120265341
chr1_bin_3384	120277587	120277720
chr1_bin_3385	120287840	120287959
chr1_bin_3386	120313789	120313871
chr1_bin_3387	120329980	120329980
chr1_bin_3388	120338960	120338960
chr1_bin_3389	120340617	120341468
chr1_bin_2031	75175729	75175729
chr1_bin_2030	75168570	75169544
chr1_bin_2033	75182959	75183011
chr1_bin_2032	75176795	75177497
chr1_bin_2035	75189732	75190454
chr1_bin_2034	75186677	75186750
chr1_bin_2037	75198510	75198555
chr1_bin_2036	75191693	75191778
chr1_bin_2039	75218508	75219898
chr1_bin_2038	75210761	75211357
chr1_bin_4329	151061600	151061600
chr1_bin_4328	151046894	151046894
chr1_bin_2815	93259689	93259747
chr1_bin_3443	122365315	122365340
chr1_bin_4322	150736755	150736855
chr1_bin_2814	93256406	93257353
chr1_bin_4320	150681042	150681166
chr1_bin_4327	151028666	151028765
chr1_bin_3446	122645310	122645359
chr1_bin_3445	122592967	122592967
chr1_bin_4324	150874601	150874601
chr1_bin_470	23101807	23101889
chr1_bin_2247	80536233	80536233
chr1_bin_472	23214994	23215114
chr1_bin_473	23247076	23248194
chr1_bin_474	23256031	23256713
chr1_bin_475	23264098	23264136
chr1_bin_5122	171357795	171357917
chr1_bin_5123	171362203	171362278
chr1_bin_5120	171329062	171330175
chr1_bin_5121	171345689	171345799
chr1_bin_5126	171386161	171386248
chr1_bin_2240	80179364	80179552
chr1_bin_5124	171380211	171380268
chr1_bin_5125	171384423	171384493
chr1_bin_5128	171409048	171409169
chr1_bin_477	23354729	23354729
chr1_bin_3818	133906679	133906799
chr1_bin_3819	133914907	133914907
chr1_bin_3810	133818197	133818315
chr1_bin_3811	133825742	133826232
chr1_bin_3812	133858763	133858763
chr1_bin_3813	133860132	133860133
chr1_bin_3814	133870576	133870670
chr1_bin_3815	133881077	133881091
chr1_bin_3816	133884856	133884929
chr1_bin_3817	133890044	133890135
chr1_bin_1903	72873895	72874093
chr1_bin_3605	131153158	131153290
chr1_bin_4652	158362806	158362875
chr1_bin_3607	131191481	131191584
chr1_bin_3606	131182967	131183090
chr1_bin_3601	131129628	131129834
chr1_bin_4656	158667606	158667718
chr1_bin_3603	131136398	131136491
chr1_bin_3602	131132551	131132574
chr1_bin_4659	158935996	158936199
chr1_bin_3978	135802617	135802707
chr1_bin_3609	131219860	131219953
chr1_bin_3608	131196639	131196839
chr1_bin_4389	152549554	152549582
chr1_bin_4388	152546456	152546478
chr1_bin_4381	152426490	152426490
chr1_bin_4380	152409522	152409522
chr1_bin_4383	152446732	152446732
chr1_bin_4382	152437463	152437504
chr1_bin_4385	152459275	152459293
chr1_bin_4384	152452735	152452735
chr1_bin_4387	152529654	152529935
chr1_bin_4386	152497389	152497484
chr1_bin_2556	89566605	89566704
chr1_bin_2557	89580158	89581748
chr1_bin_2554	89539340	89540356
chr1_bin_2555	89542905	89543021
chr1_bin_2552	89529219	89529219
chr1_bin_2553	89533638	89533723
chr1_bin_2550	89485364	89485473
chr1_bin_2551	89526796	89526888
chr1_bin_2558	89599278	89599522
chr1_bin_5127	171404813	171405146
chr1_bin_6028	191349363	191349363
chr1_bin_6029	191363818	191363919
chr1_bin_6022	191296478	191296590
chr1_bin_6023	191309911	191309985
chr1_bin_6020	191281087	191281175
chr1_bin_6021	191283651	191283765
chr1_bin_6026	191326085	191326630
chr1_bin_6027	191346626	191346821
chr1_bin_6024	191317725	191317968
chr1_bin_6025	191324290	191324344
chr1_bin_2738	91982827	91982827
chr1_bin_5129	171411475	171411867
chr1_bin_988	38626648	38627580
chr1_bin_989	38632764	38632764
chr1_bin_984	38587424	38587517
chr1_bin_985	38597021	38597116
chr1_bin_986	38607197	38607197
chr1_bin_987	38620821	38620858
chr1_bin_980	38556168	38556272
chr1_bin_981	38565145	38565248
chr1_bin_982	38572871	38572871
chr1_bin_983	38584534	38584561
chr1_bin_184	10993566	10993968
chr1_bin_185	11023393	11023466
chr1_bin_186	11189991	11190033
chr1_bin_187	11304966	11305071
chr1_bin_180	10696029	10696142
chr1_bin_181	10880372	10880372
chr1_bin_182	10888594	10888657
chr1_bin_183	10970727	10970776
chr1_bin_188	11325386	11325444
chr1_bin_189	11329483	11329652
chr1_bin_4899	166099717	166100817
chr1_bin_4898	166088914	166089020
chr1_bin_238	13125120	13125228
chr1_bin_239	13126776	13126904
chr1_bin_236	13064180	13064430
chr1_bin_237	13104044	13105014
chr1_bin_234	13020829	13020890
chr1_bin_235	13029371	13029470
chr1_bin_232	12995686	12995775
chr1_bin_233	13015538	13015544
chr1_bin_230	12990558	12991131
chr1_bin_231	12992239	12992553
chr1_bin_1559	59237045	59237321
chr1_bin_1558	59215760	59215802
chr1_bin_1553	59094776	59094836
chr1_bin_1552	59062402	59062498
chr1_bin_1551	59016255	59016255
chr1_bin_1550	58980497	58980573
chr1_bin_1557	59173105	59173220
chr1_bin_1556	59146265	59146376
chr1_bin_1555	59144645	59144715
chr1_bin_1554	59119796	59120476
chr1_bin_1148	42785415	42785415
chr1_bin_1149	42851375	42851957
chr1_bin_1144	42696761	42699644
chr1_bin_1145	42703173	42703270
chr1_bin_1146	42704582	42704697
chr1_bin_1147	42713733	42714794
chr1_bin_1140	42635342	42635397
chr1_bin_1141	42651468	42651468
chr1_bin_1142	42657602	42657689
chr1_bin_1143	42694092	42694180
chr1_bin_2932	98361188	98361217
chr1_bin_5719	184777270	184777296
chr1_bin_5718	184748719	184748814
chr1_bin_2934	98385455	98385717
chr1_bin_5715	184727415	184728040
chr1_bin_5714	184725949	184726027
chr1_bin_5717	184734138	184735286
chr1_bin_5716	184731717	184732452
chr1_bin_5711	184718629	184718706
chr1_bin_5710	184675660	184675730
chr1_bin_5713	184724794	184724910
chr1_bin_5712	184720902	184721059
chr1_bin_3433	121724502	121724536
chr1_bin_2945	98620575	98620822
chr1_bin_2944	98603329	98603374
chr1_bin_2947	98846122	98846167
chr1_bin_2946	98837292	98837349
chr1_bin_2941	98467560	98467560
chr1_bin_2940	98459654	98459684
chr1_bin_2943	98600401	98600409
chr1_bin_2942	98589585	98589595
chr1_bin_2949	98895726	98895726
chr1_bin_2948	98889436	98889729
chr1_bin_3430	121670753	121670782
chr1_bin_759	34777647	34777669
chr1_bin_758	34766333	34766443
chr1_bin_751	34616442	34616498
chr1_bin_750	34587151	34587151
chr1_bin_753	34678097	34679059
chr1_bin_752	34666751	34666874
chr1_bin_755	34721844	34723048
chr1_bin_754	34694062	34694131
chr1_bin_757	34750556	34750991
chr1_bin_756	34724583	34724788
chr1_bin_3010	102723093	102723093
chr1_bin_3011	102808198	102808218
chr1_bin_3012	102897620	102897696
chr1_bin_3013	102963072	102963471
chr1_bin_3014	103000657	103000717
chr1_bin_3015	103032961	103033053
chr1_bin_3016	103185297	103185343
chr1_bin_3017	103214685	103214685
chr1_bin_3018	103305700	103305775
chr1_bin_3019	103316652	103316757
chr1_bin_4044	136582771	136582799
chr1_bin_4045	136586154	136586162
chr1_bin_4042	136570336	136571753
chr1_bin_4043	136579334	136579501
chr1_bin_4040	136526969	136527073
chr1_bin_4041	136568757	136568817
chr1_bin_5214	172520780	172520878
chr1_bin_5215	172526075	172526212
chr1_bin_1706	64712528	64712637
chr1_bin_1707	64731697	64731697
chr1_bin_1704	64649800	64649857
chr1_bin_1705	64690364	64691652
chr1_bin_1702	64617016	64617776
chr1_bin_1703	64631824	64631824
chr1_bin_1700	64532397	64533486
chr1_bin_1701	64600616	64600718
chr1_bin_1708	64734915	64738108
chr1_bin_1709	64742637	64743392
chr1_bin_2057	75388076	75390080
chr1_bin_2056	75384163	75384251
chr1_bin_2055	75382065	75382561
chr1_bin_2054	75375274	75375755
chr1_bin_2053	75359835	75361667
chr1_bin_2052	75344423	75344534
chr1_bin_2051	75315903	75317463
chr1_bin_2050	75308911	75309053
chr1_bin_75	5993141	5993189
chr1_bin_2059	75403906	75405016
chr1_bin_2058	75401657	75401740
chr1_bin_3102	107126996	107126996
chr1_bin_535	25303906	25303919
chr1_bin_534	25177783	25178002
chr1_bin_537	25326331	25326392
chr1_bin_536	25320895	25320895
chr1_bin_531	25016276	25016369
chr1_bin_530	25010767	25010869
chr1_bin_533	25131755	25131755
chr1_bin_532	25117650	25117733
chr1_bin_539	25757676	25757798
chr1_bin_538	25520478	25520528
chr1_bin_2329	84480327	84480339
chr1_bin_2328	84414381	84414395
chr1_bin_3995	136018235	136018235
chr1_bin_3994	136007457	136007457
chr1_bin_2327	84405024	84405179
chr1_bin_2326	84383794	84383867
chr1_bin_3997	136041796	136043175
chr1_bin_3973	135763878	135763987
chr1_bin_4228	144210870	144210982
chr1_bin_3972	135759878	135760305
chr1_bin_3509	127473151	127473169
chr1_bin_3971	135755440	135755603
chr1_bin_3506	127347491	127347582
chr1_bin_3970	135749165	135749569
chr1_bin_4227	144173135	144173291
chr1_bin_4657	158862603	158862603
chr1_bin_3504	127236578	127236648
chr1_bin_3976	135793942	135793990
chr1_bin_4225	144065272	144065295
chr1_bin_3975	135781685	135781814
chr1_bin_4222	143985529	143985529
chr1_bin_3974	135765143	135766644
chr1_bin_4223	144004040	144004273
chr1_bin_4220	143854779	143854889
chr1_bin_4221	143862488	143862500
chr1_bin_3979	135818397	135819110
chr1_bin_4658	158880240	158880280
chr1_bin_3838	134108464	134108523
chr1_bin_3839	134121667	134121667
chr1_bin_3836	134095915	134095956
chr1_bin_3837	134099178	134099435
chr1_bin_3834	134087202	134087202
chr1_bin_3835	134092958	134093339
chr1_bin_3832	134077465	134079408
chr1_bin_3833	134082883	134082959
chr1_bin_3830	134061250	134061314
chr1_bin_3831	134062745	134063658
chr1_bin_1081	40156063	40156261
chr1_bin_1080	40148068	40148115
chr1_bin_1083	40212688	40212755
chr1_bin_1082	40163680	40163686
chr1_bin_1085	40281741	40281927
chr1_bin_1084	40266431	40266870
chr1_bin_1087	40376985	40376985
chr1_bin_1086	40325950	40326019
chr1_bin_1089	40453286	40453286
chr1_bin_1088	40392127	40392166
chr1_bin_3959	135686804	135686929
chr1_bin_3958	135683489	135683489
chr1_bin_3951	135628931	135628997
chr1_bin_3950	135618034	135618034
chr1_bin_3953	135637858	135637925
chr1_bin_3952	135635916	135635958
chr1_bin_3955	135664098	135664262
chr1_bin_3954	135645129	135645129
chr1_bin_3957	135673573	135673629
chr1_bin_3956	135665676	135665740
chr1_bin_1889	72639771	72639771
chr1_bin_1888	72603170	72603170
chr1_bin_1881	72481585	72481585
chr1_bin_1880	72479661	72479776
chr1_bin_1883	72536188	72536425
chr1_bin_1882	72501873	72501953
chr1_bin_1885	72566806	72566806
chr1_bin_1884	72548061	72548106
chr1_bin_1887	72597545	72597545
chr1_bin_1886	72595918	72595985
chr1_bin_3489	126547944	126548052
chr1_bin_3488	126492723	126492889
chr1_bin_3487	126159293	126159409
chr1_bin_3486	126024992	126025055
chr1_bin_3485	126019157	126019226
chr1_bin_3484	125911858	125912235
chr1_bin_3483	125886430	125886430
chr1_bin_3482	125678243	125678273
chr1_bin_3481	125676738	125676772
chr1_bin_3480	125560495	125561299
chr1_bin_2538	89258146	89258146
chr1_bin_2539	89264056	89264179
chr1_bin_2534	89143755	89143755
chr1_bin_2535	89145502	89145878
chr1_bin_2536	89194333	89194443
chr1_bin_2537	89252738	89252738
chr1_bin_2530	89069867	89071109
chr1_bin_2531	89073154	89073277
chr1_bin_2532	89107504	89107590
chr1_bin_2533	89110262	89110318
chr1_bin_5508	180961117	180961211
chr1_bin_5509	180964573	180966206
chr1_bin_2951	98946944	98946989
chr1_bin_5500	180931530	180931599
chr1_bin_5501	180935099	180935179
chr1_bin_5502	180937140	180937192
chr1_bin_5503	180941944	180942781
chr1_bin_5504	180945078	180945175
chr1_bin_5505	180949487	180950427
chr1_bin_5506	180956082	180956156
chr1_bin_5507	180958046	180958102
chr1_bin_3229	116969475	116969475
chr1_bin_3228	116861888	116861926
chr1_bin_3223	116612392	116612468
chr1_bin_3222	116457384	116457424
chr1_bin_3221	116394906	116394906
chr1_bin_3220	116123598	116123598
chr1_bin_3227	116839250	116839341
chr1_bin_3226	116774929	116774974
chr1_bin_3225	116667738	116667892
chr1_bin_3224	116663704	116663704
chr1_bin_2282	82446181	82446412
chr1_bin_2283	82497208	82497296
chr1_bin_2280	82316224	82316828
chr1_bin_2281	82420463	82420509
chr1_bin_2286	82538897	82539077
chr1_bin_2287	82586779	82586825
chr1_bin_2284	82519358	82519436
chr1_bin_2285	82528184	82528257
chr1_bin_2288	82607876	82607876
chr1_bin_2289	82672707	82672779
chr1_bin_258	13551895	13551926
chr1_bin_259	13589195	13590534
chr1_bin_4871	165645795	165645800
chr1_bin_4870	165641929	165642967
chr1_bin_4877	165707918	165707988
chr1_bin_4876	165668105	165668215
chr1_bin_4875	165663349	165663472
chr1_bin_4874	165657529	165657683
chr1_bin_250	13372130	13374781
chr1_bin_251	13435474	13435520
chr1_bin_4879	165742976	165743048
chr1_bin_4878	165724376	165724477
chr1_bin_254	13477846	13477887
chr1_bin_255	13482320	13482320
chr1_bin_256	13529875	13529997
chr1_bin_257	13549263	13549263
chr1_bin_1571	59393260	59393359
chr1_bin_1570	59377452	59377557
chr1_bin_1573	59423143	59423652
chr1_bin_1572	59398283	59398283
chr1_bin_1575	59449119	59449209
chr1_bin_1574	59443114	59443115
chr1_bin_1577	59466113	59466113
chr1_bin_1576	59450631	59450631
chr1_bin_1579	59474347	59474347
chr1_bin_1578	59471294	59471394
chr1_bin_1162	43163604	43164073
chr1_bin_1163	43189083	43189116
chr1_bin_1160	43092197	43092875
chr1_bin_1161	43098900	43099112
chr1_bin_1166	43445576	43446790
chr1_bin_1167	43473557	43473557
chr1_bin_1164	43246585	43246585
chr1_bin_1165	43410311	43410398
chr1_bin_1168	43502914	43502997
chr1_bin_1169	43511999	43512002
chr1_bin_5089	171070581	171073510
chr1_bin_5088	171063786	171065875
chr1_bin_5085	171044716	171044716
chr1_bin_5084	171032756	171032949
chr1_bin_5087	171057671	171057718
chr1_bin_5086	171049710	171049710
chr1_bin_5081	170948745	170948760
chr1_bin_5080	170942060	170942153
chr1_bin_5083	171016465	171016465
chr1_bin_5082	170969310	170969388
chr1_bin_3036	104437228	104437297
chr1_bin_3037	104561281	104561381
chr1_bin_3034	104377445	104377445
chr1_bin_3035	104388875	104389107
chr1_bin_3032	104238341	104238341
chr1_bin_4021	136345100	136346152
chr1_bin_3030	104159007	104159283
chr1_bin_4023	136365018	136365071
chr1_bin_4028	136421855	136421855
chr1_bin_4029	136436701	136436800
chr1_bin_3038	104666133	104666251
chr1_bin_3039	104769466	104769569
chr1_bin_1768	67107979	67108144
chr1_bin_1769	67224755	67224852
chr1_bin_1764	66984291	66984422
chr1_bin_1765	67028807	67028807
chr1_bin_1766	67038745	67038937
chr1_bin_1767	67055837	67055918
chr1_bin_1760	66863090	66863361
chr1_bin_1761	66925889	66925941
chr1_bin_1762	66969374	66969422
chr1_bin_1763	66979956	66980033
chr1_bin_885	36789276	36789276
chr1_bin_884	36785021	36785247
chr1_bin_887	36794439	36795353
chr1_bin_886	36791129	36791129
chr1_bin_881	36771049	36771121
chr1_bin_880	36768623	36768776
chr1_bin_883	36781585	36781684
chr1_bin_882	36779085	36779147
chr1_bin_739	34443496	34443496
chr1_bin_738	34439036	34439822
chr1_bin_889	36809188	36810292
chr1_bin_888	36798126	36798243
chr1_bin_509	24329828	24329894
chr1_bin_5192	172326494	172326511
chr1_bin_5869	188911961	188912083
chr1_bin_5868	188910779	188910779
chr1_bin_5863	188866431	188866493
chr1_bin_5862	188841355	188841398
chr1_bin_5861	188804272	188804353
chr1_bin_5860	188797629	188797838
chr1_bin_5867	188906611	188906696
chr1_bin_5866	188903000	188904336
chr1_bin_5865	188891332	188891332
chr1_bin_5864	188881104	188882019
chr1_bin_2079	75484419	75484941
chr1_bin_2078	75478579	75480345
chr1_bin_2075	75469704	75469816
chr1_bin_2074	75467766	75467846
chr1_bin_2077	75477400	75477400
chr1_bin_2076	75475229	75475557
chr1_bin_2071	75448209	75448300
chr1_bin_2070	75446812	75446879
chr1_bin_2073	75458516	75458668
chr1_bin_2072	75449672	75451271
chr1_bin_2739	91987628	91987723
chr1_bin_2732	91804682	91805165
chr1_bin_2733	91838204	91838251
chr1_bin_2730	91799738	91799835
chr1_bin_2731	91800892	91801767
chr1_bin_2736	91928484	91928552
chr1_bin_2737	91945710	91945710
chr1_bin_2734	91887031	91887108
chr1_bin_2735	91893827	91893934
chr1_bin_3854	134344203	134344325
chr1_bin_3855	134354694	134354771
chr1_bin_3856	134358414	134358511
chr1_bin_3857	134361340	134362027
chr1_bin_3850	134302798	134302911
chr1_bin_3851	134313466	134313540
chr1_bin_3852	134321918	134321990
chr1_bin_3853	134334798	134334798
chr1_bin_3858	134390253	134390253
chr1_bin_3859	134405973	134406401
chr1_bin_3939	135510722	135510731
chr1_bin_3938	135508543	135508543
chr1_bin_3937	135502252	135502293
chr1_bin_3936	135498678	135498678
chr1_bin_3935	135474573	135474613
chr1_bin_3934	135470862	135471087
chr1_bin_3933	135454251	135454650
chr1_bin_4612	156809049	156809120
chr1_bin_3931	135445456	135445563
chr1_bin_3930	135443688	135443800
chr1_bin_1619	61185897	61185911
chr1_bin_3253	117946461	117946527
chr1_bin_2047	75277668	75277772
chr1_bin_5698	184279497	184279581
chr1_bin_5699	184299750	184299849
chr1_bin_5690	184161162	184161162
chr1_bin_5691	184209575	184209658
chr1_bin_5692	184216059	184216138
chr1_bin_5693	184235168	184235396
chr1_bin_5694	184254877	184254936
chr1_bin_5695	184263526	184263570
chr1_bin_5696	184265705	184265731
chr1_bin_5697	184271454	184271454
chr1_bin_2512	88635957	88636352
chr1_bin_2513	88668636	88668713
chr1_bin_2510	88590991	88590991
chr1_bin_2511	88602611	88602690
chr1_bin_2516	88700886	88702383
chr1_bin_2517	88706031	88706133
chr1_bin_2514	88690200	88690318
chr1_bin_2515	88693812	88693922
chr1_bin_2518	88745892	88745892
chr1_bin_2519	88756944	88757064
chr1_bin_5528	181282611	181282815
chr1_bin_5529	181285581	181285581
chr1_bin_5526	181269290	181270280
chr1_bin_5527	181273694	181273845
chr1_bin_5524	181251323	181251412
chr1_bin_5525	181257330	181257359
chr1_bin_5522	181228488	181228488
chr1_bin_5523	181230252	181230370
chr1_bin_5520	181198433	181198479
chr1_bin_5521	181211375	181212446
chr1_bin_3201	114385020	114385020
chr1_bin_3200	114276693	114276738
chr1_bin_3203	114558373	114558425
chr1_bin_3202	114500210	114500255
chr1_bin_3205	114576502	114576666
chr1_bin_3204	114568033	114568033
chr1_bin_3207	114662599	114662633
chr1_bin_3206	114643774	114643774
chr1_bin_3209	114794067	114794067
chr1_bin_3208	114737593	114737639
chr1_bin_3604	131137814	131138197
chr1_bin_272	14085034	14085415
chr1_bin_273	14105335	14105430
chr1_bin_270	13961059	13961293
chr1_bin_271	14034007	14034399
chr1_bin_276	14358035	14358135
chr1_bin_277	14447696	14447719
chr1_bin_274	14179371	14179371
chr1_bin_275	14309670	14309807
chr1_bin_4851	165237010	165237111
chr1_bin_4850	165205303	165205364
chr1_bin_278	14468154	14468260
chr1_bin_279	14482443	14482468
chr1_bin_4855	165281854	165282765
chr1_bin_4854	165261537	165262140
chr1_bin_4857	165310452	165311037
chr1_bin_4856	165290017	165290017
chr1_bin_1517	58307280	58307381
chr1_bin_1516	58304373	58304451
chr1_bin_1515	58281409	58281481
chr1_bin_1514	58257349	58257459
chr1_bin_1513	58239034	58239034
chr1_bin_1512	58220125	58220313
chr1_bin_1511	58197420	58197513
chr1_bin_1510	58177512	58177618
chr1_bin_1519	58348995	58348995
chr1_bin_1518	58322211	58322294
chr1_bin_5988	190827970	190828059
chr1_bin_5989	190838105	190838183
chr1_bin_5984	190742013	190742013
chr1_bin_5985	190763816	190763816
chr1_bin_5986	190772233	190772323
chr1_bin_5987	190799544	190799639
chr1_bin_5980	190691627	190692378
chr1_bin_5981	190711957	190712064
chr1_bin_5982	190716887	190716914
chr1_bin_5983	190738262	190738362
chr1_bin_4589	156404131	156404131
chr1_bin_4588	156378206	156378326
chr1_bin_4587	156362987	156363230
chr1_bin_4586	156310764	156311039
chr1_bin_4585	156303007	156304205
chr1_bin_4584	156293151	156293151
chr1_bin_4583	156277400	156277400
chr1_bin_4582	156203661	156205044
chr1_bin_4581	156111813	156111943
chr1_bin_4580	156056176	156056176
chr1_bin_5328	177572738	177572842
chr1_bin_5329	177589173	177589246
chr1_bin_5320	177246397	177246478
chr1_bin_5321	177257498	177258793
chr1_bin_5322	177281502	177281602
chr1_bin_5323	177394327	177394403
chr1_bin_5324	177421474	177421474
chr1_bin_5325	177441558	177443176
chr1_bin_5326	177463207	177463263
chr1_bin_5327	177491427	177491488
chr1_bin_5063	170613185	170613285
chr1_bin_5062	170599583	170599780
chr1_bin_5061	170595901	170596179
chr1_bin_5060	170588477	170589978
chr1_bin_5067	170686911	170686999
chr1_bin_5066	170681401	170681401
chr1_bin_5065	170644135	170644657
chr1_bin_5064	170637838	170638843
chr1_bin_5069	170747824	170747920
chr1_bin_5068	170691867	170692909
chr1_bin_4895	166048754	166048865
chr1_bin_4894	166004942	166004942
chr1_bin_4897	166078465	166078549
chr1_bin_4896	166064638	166064687
chr1_bin_4891	165859046	165859563
chr1_bin_4890	165845056	165845846
chr1_bin_4893	166000548	166003520
chr1_bin_4892	165963593	165963593
chr1_bin_4008	136158630	136158733
chr1_bin_4009	136161440	136161440
chr1_bin_3058	105568279	105568314
chr1_bin_3059	105574494	105574511
chr1_bin_3054	105469464	105469536
chr1_bin_4003	136131675	136132018
chr1_bin_3056	105507756	105507756
chr1_bin_4001	136105187	136105593
chr1_bin_4006	136142966	136143057
chr1_bin_4007	136144654	136144662
chr1_bin_3052	105429954	105430030
chr1_bin_3053	105456026	105456034
chr1_bin_1742	66175139	66175693
chr1_bin_1743	66243157	66243234
chr1_bin_1740	66017196	66017324
chr1_bin_1741	66037101	66037146
chr1_bin_1746	66483333	66483377
chr1_bin_1747	66521002	66521047
chr1_bin_1744	66277703	66277726
chr1_bin_1745	66468044	66468434
chr1_bin_1748	66569847	66569920
chr1_bin_1749	66580062	66580062
chr1_bin_719	34177888	34178289
chr1_bin_718	34175816	34175816
chr1_bin_869	36682531	36682974
chr1_bin_868	36644250	36644250
chr1_bin_715	34139667	34139667
chr1_bin_714	34121779	34121856
chr1_bin_717	34152345	34152432
chr1_bin_716	34148091	34148163
chr1_bin_711	34088640	34089460
chr1_bin_710	34076249	34076337
chr1_bin_861	36550074	36550099
chr1_bin_860	36546983	36547189
chr1_bin_2899	96669177	96669400
chr1_bin_2898	96663402	96663472
chr1_bin_2893	96454666	96454691
chr1_bin_2892	96334286	96334405
chr1_bin_2891	96240921	96240992
chr1_bin_2890	96191457	96191510
chr1_bin_2897	96645782	96645893
chr1_bin_2896	96640994	96641033
chr1_bin_2895	96535981	96536016
chr1_bin_2894	96504141	96504141
chr1_bin_3478	125349138	125349187
chr1_bin_3479	125435248	125436689
chr1_bin_5841	188171474	188171515
chr1_bin_3476	125331617	125331617
chr1_bin_5843	188263239	188263344
chr1_bin_5842	188215528	188215627
chr1_bin_5845	188295416	188295621
chr1_bin_5844	188270661	188270719
chr1_bin_5847	188344409	188344524
chr1_bin_3477	125347110	125347228
chr1_bin_5849	188408119	188408119
chr1_bin_5848	188381480	188381547
chr1_bin_3474	125287962	125287962
chr1_bin_3475	125318115	125318249
chr1_bin_3472	125205196	125205239
chr1_bin_3473	125271461	125271558
chr1_bin_2093	75592213	75592213
chr1_bin_2092	75556964	75556972
chr1_bin_2091	75551217	75552627
chr1_bin_2090	75549776	75549848
chr1_bin_2097	75657062	75657401
chr1_bin_3470	125135160	125135178
chr1_bin_2095	75601593	75601612
chr1_bin_2094	75597488	75597497
chr1_bin_2099	75680757	75680832
chr1_bin_2098	75674641	75674757
chr1_bin_3878	134708888	134709412
chr1_bin_3879	134718977	134719184
chr1_bin_3872	134645421	134645421
chr1_bin_3873	134646534	134646992
chr1_bin_3870	134560436	134561735
chr1_bin_3871	134609192	134609262
chr1_bin_3876	134697561	134697765
chr1_bin_3877	134700763	134700865
chr1_bin_3874	134653835	134653912
chr1_bin_3875	134683587	134683587
chr1_bin_3915	135306639	135306795
chr1_bin_3914	135283349	135283969
chr1_bin_3917	135328164	135328164
chr1_bin_4636	157473993	157474060
chr1_bin_3911	135233921	135234848
chr1_bin_4630	157440322	157440395
chr1_bin_4633	157451787	157451787
chr1_bin_3912	135248513	135248600
chr1_bin_3919	135358853	135358853
chr1_bin_3918	135342190	135342203
chr1_bin_2423	86579986	86579986
chr1_bin_5544	181455401	181455406
chr1_bin_5545	181460527	181460567
chr1_bin_5546	181477538	181477632
chr1_bin_5547	181484236	181484289
chr1_bin_5540	181392889	181392950
chr1_bin_5541	181423807	181423875
chr1_bin_5542	181426346	181426444
chr1_bin_5543	181434872	181434872
chr1_bin_5548	181494242	181494287
chr1_bin_5549	181539921	181540946
chr1_bin_3267	118154718	118154718
chr1_bin_3266	118153215	118153250
chr1_bin_3265	118149284	118149321
chr1_bin_3264	118118465	118118515
chr1_bin_3263	118114851	118115190
chr1_bin_3262	118104533	118105229
chr1_bin_3261	118097468	118097521
chr1_bin_3260	118073282	118073484
chr1_bin_6084	192789376	192789448
chr1_bin_6085	192828400	192828500
chr1_bin_6086	192834291	192835233
chr1_bin_6087	192850856	192851058
chr1_bin_6080	192735692	192735799
chr1_bin_6081	192741162	192741281
chr1_bin_3269	118180835	118180910
chr1_bin_3268	118158884	118159017
chr1_bin_2798	93103054	93103181
chr1_bin_2799	93114845	93114852
chr1_bin_2794	93065508	93065519
chr1_bin_2795	93069991	93070021
chr1_bin_2796	93082369	93082416
chr1_bin_2797	93101806	93102017
chr1_bin_2790	92975645	92975717
chr1_bin_2791	92988303	92988303
chr1_bin_2792	93060204	93060224
chr1_bin_2793	93062800	93062877
chr1_bin_1687	64092530	64092530
chr1_bin_1686	64079213	64079295
chr1_bin_1685	64061257	64061344
chr1_bin_1684	63968114	63968316
chr1_bin_1683	63959276	63959318
chr1_bin_1682	63859310	63859355
chr1_bin_1681	63751153	63751237
chr1_bin_1680	63730727	63730834
chr1_bin_1689	64120570	64122052
chr1_bin_1688	64116999	64117078
chr1_bin_2138	77457067	77457154
chr1_bin_2139	77458761	77458827
chr1_bin_298	15264315	15264360
chr1_bin_299	15286477	15287263
chr1_bin_4839	165082671	165082717
chr1_bin_4838	165067030	165067030
chr1_bin_294	15080899	15080899
chr1_bin_4836	165026310	165026348
chr1_bin_4835	164987845	164987901
chr1_bin_4834	164985956	164985998
chr1_bin_4833	164978017	164978056
chr1_bin_4832	164969935	164969973
chr1_bin_4831	164916545	164916778
chr1_bin_4830	164884205	164884283
chr1_bin_1539	58811563	58811563
chr1_bin_1538	58802854	58802854
chr1_bin_1535	58723800	58723800
chr1_bin_1534	58711586	58711754
chr1_bin_1537	58795654	58795794
chr1_bin_1536	58789455	58789467
chr1_bin_1531	58652793	58652846
chr1_bin_1530	58645432	58645432
chr1_bin_1533	58704394	58704518
chr1_bin_1532	58665139	58665245
chr1_bin_917	37331503	37331610
chr1_bin_5308	176881106	176881158
chr1_bin_916	37299887	37300425
chr1_bin_5306	176835653	176836186
chr1_bin_5307	176861891	176861975
chr1_bin_5304	176802605	176802605
chr1_bin_5305	176813738	176813917
chr1_bin_5302	176683708	176683708
chr1_bin_915	37283214	37283293
chr1_bin_5300	176587001	176587120
chr1_bin_5301	176668512	176668512
chr1_bin_914	37275031	37275104
chr1_bin_913	37261251	37261539
chr1_bin_440	21166359	21166544
chr1_bin_911	37240660	37240797
chr1_bin_910	37234932	37235053
chr1_bin_5049	170387411	170387411
chr1_bin_5048	170367599	170367661
chr1_bin_5041	170255321	170255734
chr1_bin_5040	170214935	170215371
chr1_bin_5043	170308949	170309057
chr1_bin_5042	170262151	170262230
chr1_bin_5045	170328769	170328769
chr1_bin_5044	170326482	170326545
chr1_bin_5047	170360394	170360394
chr1_bin_5046	170332126	170332126
chr1_bin_3536	128478649	128478649
chr1_bin_3535	128474728	128474760
chr1_bin_955	38074199	38074199
chr1_bin_4798	163929836	163930402
chr1_bin_4799	163994921	163994996
chr1_bin_4792	163653250	163653250
chr1_bin_4793	163722434	163722512
chr1_bin_4790	163574757	163574794
chr1_bin_4791	163618111	163618111
chr1_bin_4796	163800122	163800122
chr1_bin_4797	163805166	163805327
chr1_bin_4794	163779711	163779913
chr1_bin_4795	163793998	163794096
chr1_bin_3072	106063087	106063179
chr1_bin_3073	106119075	106119639
chr1_bin_3070	105990452	105991739
[truncated: 88,204 more rows]
