# Supplementary material for: Dietary Restriction and Rapamycin Affect Brain Aging in Mice by Attenuating Age-Related DNA Methylation Changes
Source: Genes (Basel). 2022 Apr 15;13(4):699. doi: 10.3390/genes13040699 (PMC9030181; doi:10.3390/genes13040699)
Supplement: Supplementary file 1 [file genes-13-00699-s001.zip › Table S1 - Differnt Expression Genes and DR_RALL ameliorate Genes .xlsx]

## Sheet: aging-related DEGs
test_id	gene_id	locus	sample_1	sample_2	status	value_1	value_2	log2(fold_change)	test_stat	p_value	q_value
Trh	Trh	chr6:92242060-92244650	Young	Old	OK	2.43011	0.436788	-2.47602	-4.35362	5e-05	0.00513775
4931408D14Rik	4931408D14Rik	chr19:37258425-37264095	Young	Old	OK	0.468912	0.128009	-1.87308	-2.67181	0.0002	0.0159138
Igfbpl1	Igfbpl1	chr4:45809506-45826827	Young	Old	OK	0.598264	0.188128	-1.66907	-2.66928	5e-05	0.00513775
Ccdc42	Ccdc42	chr11:68587036-68597951	Young	Old	OK	1.03298	0.415066	-1.3154	-1.72273	0.00685	0.207182
Scn5a	Scn5a	chr9:119483407-119579016	Young	Old	OK	0.510393	0.235339	-1.11687	-1.56604	0.0012	0.062064
Actn3	Actn3	chr19:4861215-4877909	Young	Old	OK	0.564329	0.290683	-0.95709	-1.34585	0.01665	0.371714
Nxph4	Nxph4	chr10:127525472-127534559	Young	Old	OK	1.50078	0.779823	-0.944494	-1.9501	0.00165	0.0771127
Arhgap36	Arhgap36	chrX:49463944-49500250	Young	Old	OK	0.758569	0.396897	-0.934515	-1.89748	0.002	0.0881591
Cdh3	Cdh3	chr8:106510851-106556911	Young	Old	OK	0.416879	0.21896	-0.928957	-1.64068	0.00685	0.207182
Usp43	Usp43	chr11:67854522-67922153	Young	Old	OK	0.429404	0.22572	-0.9278	-1.41431	0.0128	0.310806
Six3	Six3	chr17:85620580-85629302	Young	Old	OK	0.435602	0.233174	-0.901603	-1.5464	0.0051	0.169447
Ecel1	Ecel1	chr1:87147654-87156356	Young	Old	OK	2.24624	1.22234	-0.877863	-2.49182	5e-05	0.00513775
Gpr88	Gpr88	chr3:116249653-116253484	Young	Old	OK	3.69988	2.02562	-0.869117	-2.98539	5e-05	0.00513775
AK138476	AK138476	chr5:37185896-37193021	Young	Old	OK	0.52159	0.291636	-0.838745	-1.21388	0.03425	0.569585
AK013627	AK013627	chr14:76251461-76252325	Young	Old	OK	6.54949	3.68921	-0.828069	-1.67611	0.0092	0.249123
Ndn	Ndn	chr7:62348276-62349927	Young	Old	OK	157.9	89.0617	-0.826131	-4.03828	5e-05	0.00513775
Rasgef1c	Rasgef1c	chr11:49901834-49980223	Young	Old	OK	1.77823	1.0086	-0.818086	-1.95023	0.0013	0.0657029
Mkrn3	Mkrn3	chr7:62417592-62420139	Young	Old	OK	0.516767	0.294883	-0.80937	-1.40499	0.0174	0.380251
Baiap3	Baiap3	chr17:25240169-25256364	Young	Old	OK	3.49983	2.0621	-0.763168	-1.47842	0.03765	0.604113
Kcne2	Kcne2	chr16:92292388-92298133	Young	Old	OK	10.293	6.10271	-0.754135	-1.22722	0.0395	0.623945
Gm11627	Gm11627	chr11:102576398-102579119	Young	Old	OK	2.24105	1.33867	-0.743378	-1.24303	0.0319	0.547523
Cldn1	Cldn1	chr16:26356645-26371839	Young	Old	OK	2.38195	1.42986	-0.736265	-2.23957	0.0001	0.00918107
Slc4a5	Slc4a5	chr6:83237374-83304945	Young	Old	OK	2.53767	1.53009	-0.729885	-2.20165	0.0001	0.00918107
Aqp1	Aqp1	chr6:55336298-55348555	Young	Old	OK	3.69861	2.23127	-0.729118	-2.303	5e-05	0.00513775
Ide	Ide	chr19:37268740-37337852	Young	Old	OK	20.5422	12.4073	-0.727401	-3.58467	5e-05	0.00513775
F5	F5	chr1:164115263-164220277	Young	Old	OK	3.15163	1.94031	-0.699811	-2.65083	5e-05	0.00513775
Hes5	Hes5	chr4:154960922-154962371	Young	Old	OK	7.14939	4.40394	-0.699027	-2.20652	0.0001	0.00918107
Rrad	Rrad	chr8:104628065-104631321	Young	Old	OK	1.05286	0.654774	-0.685239	-1.24777	0.0312	0.542104
Tmem72	Tmem72	chr6:116692724-116716758	Young	Old	OK	2.1281	1.3265	-0.68194	-1.95308	0.00115	0.0600788
Bmp3	Bmp3	chr5:98854414-98884053	Young	Old	OK	1.73236	1.09483	-0.66203	-2.2926	5e-05	0.00513775
Dtl	Dtl	chr1:191537355-191575544	Young	Old	OK	1.02382	0.650699	-0.653902	-1.4764	0.00955	0.254601
Plppr1	Plppr1	chr4:49059461-49340261	Young	Old	OK	2.02976	1.29585	-0.647416	-1.93237	0.00075	0.0456353
Cartpt	Cartpt	chr13:99898482-99900683	Young	Old	OK	3.77412	2.40979	-0.647234	-1.42408	0.01415	0.331148
Henmt1	Henmt1	chr3:108940083-108960776	Young	Old	OK	0.736378	0.470243	-0.647039	-1.13911	0.04035	0.63112
Tacr1	Tacr1	chr6:82402474-82560104	Young	Old	OK	0.703522	0.452439	-0.636873	-1.53712	0.0077	0.221657
Clic6	Clic6	chr16:92498146-92541241	Young	Old	OK	9.45528	6.09604	-0.633248	-2.60328	5e-05	0.00513775
Gpr6	Gpr6	chr10:41069980-41072285	Young	Old	OK	0.975319	0.629587	-0.63147	-1.10721	0.0453	0.682403
Folr1	Folr1	chr7:101858330-101870788	Young	Old	OK	12.2602	7.99281	-0.617208	-1.97507	0.00085	0.0490283
Sox11	Sox11	chr12:27334267-27342718	Young	Old	OK	2.61159	1.70477	-0.615346	-2.55941	5e-05	0.00513775
Cfap52	Cfap52	chr11:67924805-67965642	Young	Old	OK	1.23549	0.806575	-0.615202	-1.33658	0.0205	0.421675
Tnc	Tnc	chr4:63959784-64149924	Young	Old	OK	1.18373	0.777315	-0.606762	-1.79906	0.00195	0.0871937
Gpr165	Gpr165	chrX:96713467-96719388	Young	Old	OK	2.43779	1.60135	-0.606287	-1.90855	0.00105	0.0571642
Gpr17	Gpr17	chr18:31931506-31958619	Young	Old	OK	13.9518	9.21714	-0.598061	-2.68136	5e-05	0.00513775
4930539E08Rik	4930539E08Rik	chr17:28896394-28915324	Young	Old	OK	1.48932	0.996057	-0.580352	-1.77155	0.00265	0.107077
Sostdc1	Sostdc1	chr12:36314168-36318452	Young	Old	OK	7.46022	5.01548	-0.57283	-2.00624	0.0003	0.0221657
Zfp184	Zfp184	chr13:21945093-21960485	Young	Old	OK	1.05849	0.713706	-0.568612	-1.30217	0.0229	0.454369
Dcx	Dcx	chrX:143855841-143933219	Young	Old	OK	2.22099	1.50229	-0.564046	-2.1203	0.0003	0.0221657
Ttr	Ttr	chr18:20665249-20674326	Young	Old	OK	1142.23	774.052	-0.561356	-2.01383	0.00095	0.0528323
Dmrta2	Dmrta2	chr4:109978024-109983684	Young	Old	OK	1.0465	0.710694	-0.558273	-1.32205	0.02425	0.469742
Ntsr1	Ntsr1	chr2:180499975-180544979	Young	Old	OK	2.17032	1.48419	-0.548238	-1.79642	0.0016	0.0759193
Pomc	Pomc	chr12:3954944-3960643	Young	Old	OK	2.58303	1.77009	-0.545245	-1.15912	0.03865	0.615702
Cldn2	Cldn2	chrX:139800807-139811388	Young	Old	OK	4.06597	2.79478	-0.540866	-1.12483	0.0495	0.710492
Otof	Otof	chr5:30367065-30461932	Young	Old	OK	0.959114	0.6599	-0.539455	-1.64478	0.0044	0.153073
Fgfbp3	Fgfbp3	chr19:36917549-36919599	Young	Old	OK	3.93458	2.70931	-0.538287	-1.60214	0.00525	0.173317
Btaf1	Btaf1	chr19:36926078-37014057	Young	Old	OK	7.01505	4.83717	-0.536291	-2.60601	5e-05	0.00513775
Cbln4	Cbln4	chr2:172036335-172043466	Young	Old	OK	6.49033	4.48169	-0.53425	-2.11981	0.00015	0.0126489
Vat1l	Vat1l	chr8:114205639-114374070	Young	Old	OK	14.5773	10.0768	-0.532688	-2.54311	5e-05	0.00513775
Pcdh18	Pcdh18	chr3:49743295-49757316	Young	Old	OK	1.18061	0.818106	-0.529172	-1.56264	0.00765	0.220627
Cbx2	Cbx2	chr11:119023020-119031275	Young	Old	OK	0.713354	0.495503	-0.525724	-1.20048	0.03805	0.609271
Tmem215	Tmem215	chr4:40472179-40475653	Young	Old	OK	6.49611	4.5207	-0.523028	-1.23355	0.03105	0.540709
Atp2b4	Atp2b4	chr1:133702673-133800754	Young	Old	OK	25.0709	17.4677	-0.52132	-2.22502	0.0002	0.0159138
Prkg2	Prkg2	chr5:98929772-99037079	Young	Old	OK	1.31848	0.923012	-0.514459	-1.49509	0.0107	0.273962
Sec14l3	Sec14l3	chr11:4064852-4078990	Young	Old	OK	0.908092	0.636839	-0.51191	-1.24091	0.03185	0.54727
1500015O10Rik	1500015O10Rik	chr1:43730601-43742564	Young	Old	OK	19.1531	13.4713	-0.507685	-1.80012	0.00135	0.0671365
Mycn	Mycn	chr12:12936092-12941836	Young	Old	OK	3.12698	2.20503	-0.503972	-1.62492	0.00425	0.14852
Kcnh7	Kcnh7	chr2:62702945-63184287	Young	Old	OK	4.17732	2.96972	-0.492251	-1.84959	0.0017	0.0780391
Klf5	Klf5	chr14:99298690-99313409	Young	Old	OK	3.19582	2.27958	-0.487416	-1.37535	0.0171	0.37688
Cbx8	Cbx8	chr11:119038435-119040913	Young	Old	OK	5.45469	3.90036	-0.483888	-1.49731	0.0098	0.259041
Pgam2	Pgam2	chr11:5801636-5803796	Young	Old	OK	10.3569	7.42211	-0.480698	-1.5303	0.00875	0.242871
Mex3a	Mex3a	chr3:88532394-88541394	Young	Old	OK	0.750101	0.537676	-0.48035	-1.28888	0.0257	0.483933
AW551984	AW551984	chr9:39587395-39604124	Young	Old	OK	1.99991	1.43581	-0.478071	-1.57941	0.00725	0.214677
Kirrel2	Kirrel2	chr7:30447765-30457515	Young	Old	OK	2.87191	2.08089	-0.464813	-1.4315	0.0124	0.30491
Prokr2	Prokr2	chr2:132370328-132385447	Young	Old	OK	1.12256	0.813853	-0.463947	-1.27777	0.02675	0.493523
Chsy3	Chsy3	chr18:59175339-59411336	Young	Old	OK	2.33206	1.69381	-0.461337	-1.5573	0.00715	0.212528
Mme	Mme	chr3:63295434-63383713	Young	Old	OK	1.344	0.977549	-0.45929	-1.48162	0.00995	0.260784
Kl	Kl	chr5:150952606-150993817	Young	Old	OK	15.6173	11.3983	-0.454328	-2.06085	0.0003	0.0221657
Cntnap3	Cntnap3	chr13:64737590-64903888	Young	Old	OK	1.92179	1.40447	-0.45243	-1.34328	0.0199	0.413277
Moxd1	Moxd1	chr10:24223516-24302783	Young	Old	OK	3.85988	2.82997	-0.447769	-1.62465	0.0058	0.185552
Reln	Reln	chr5:21884453-22344705	Young	Old	OK	16.363	12.0095	-0.446258	-1.27751	0.02375	0.465284
Sema3f	Sema3f	chr9:107681501-107710475	Young	Old	OK	1.55087	1.13907	-0.445225	-1.27392	0.02675	0.493523
Vwc2l	Vwc2l	chr1:70725714-70885397	Young	Old	OK	3.48451	2.55982	-0.444916	-1.67976	0.0038	0.138406
Brwd3	Brwd3	chrX:108742207-108834355	Young	Old	OK	1.54858	1.14653	-0.433663	-1.46783	0.00895	0.245784
Sncaip	Sncaip	chr18:52767810-52915931	Young	Old	OK	1.61448	1.20604	-0.420794	-1.21092	0.0355	0.581645
Satb2	Satb2	chr1:56793980-56971334	Young	Old	OK	4.73766	3.54106	-0.419992	-1.82348	0.0012	0.062064
AK187054	AK187054	chr5:5783448-5783620	Young	Old	OK	343.564	256.794	-0.419968	-1.25026	0.03135	0.542542
Nog	Nog	chr11:89300637-89302559	Young	Old	OK	3.52443	2.63612	-0.418973	-1.27872	0.0276	0.503222
Lypd1	Lypd1	chr1:125676995-125912928	Young	Old	OK	16.3129	12.2064	-0.418372	-1.73783	0.0027	0.107972
Zdbf2	Zdbf2	chr1:63182570-63314575	Young	Old	OK	3.95273	2.97739	-0.408802	-1.95755	0.00055	0.036314
Myh7	Myh7	chr14:54968786-54994549	Young	Old	OK	1.54694	1.16616	-0.407657	-1.37518	0.0148	0.343768
Unc13c	Unc13c	chr9:73479423-73933567	Young	Old	OK	5.15057	3.88285	-0.407617	-1.87045	0.0015	0.0727312
Rprm	Rprm	chr2:54084092-54085552	Young	Old	OK	24.3459	18.3607	-0.407057	-1.81835	0.00215	0.0924083
Cacnb2	Cacnb2	chr2:14604305-14987908	Young	Old	OK	21.6322	16.3223	-0.406338	-1.63116	0.0059	0.187207
Cdh4	Cdh4	chr2:179442430-179899375	Young	Old	OK	3.11479	2.35284	-0.404735	-1.64896	0.0034	0.128045
Ptpro	Ptpro	chr6:137252298-137464633	Young	Old	OK	6.84702	5.17579	-0.403696	-1.88295	0.0009	0.050965
Nwd2	Nwd2	chr5:63646170-63810543	Young	Old	OK	5.76519	4.36325	-0.401967	-1.726	0.00345	0.128678
Nts	Nts	chr10:102481755-102490418	Young	Old	OK	6.60618	5.00114	-0.40156	-1.24549	0.0305	0.53716
Glra2	Glra2	chrX:165129016-165326981	Young	Old	OK	3.51319	2.6634	-0.399514	-1.35987	0.01555	0.356387
Sox4	Sox4	chr13:28950729-28953682	Young	Old	OK	5.59155	4.24566	-0.397259	-1.57005	0.0059	0.187207
Casp3	Casp3	chr8:46617290-46639698	Young	Old	OK	3.82841	2.9109	-0.395281	-1.35915	0.01915	0.405868
Enpp2	Enpp2	chr15:54835216-54920146	Young	Old	OK	278.491	211.913	-0.394156	-1.59105	0.00705	0.210361
Wfs1	Wfs1	chr5:36966103-36988982	Young	Old	OK	51.4286	39.2096	-0.391365	-1.99051	0.00045	0.0308947
Ppp1r3g	Ppp1r3g	chr13:35967905-35970388	Young	Old	OK	5.68178	4.33187	-0.391352	-1.18263	0.0426	0.655086
Penk	Penk	chr4:4133535-4188703	Young	Old	OK	28.2937	21.5758	-0.391067	-1.67689	0.0038	0.138406
Tekt5	Tekt5	chr16:10357951-10395465	Young	Old	OK	5.69031	4.34611	-0.388784	-1.30871	0.02245	0.449463
Steap2	Steap2	chr5:5664828-5694568	Young	Old	OK	2.13362	1.63196	-0.386695	-1.2191	0.0334	0.562076
Plcxd3	Plcxd3	chr15:4375490-4575579	Young	Old	OK	6.00521	4.59377	-0.386534	-1.37668	0.0166	0.371668
Htr4	Htr4	chr18:62324203-62496574	Young	Old	OK	4.95937	3.79588	-0.385723	-1.13398	0.0433	0.660612
Fosb	Fosb	chr7:19302695-19310045	Young	Old	OK	7.69711	5.90316	-0.382829	-1.61172	0.0051	0.169447
Rcor2	Rcor2	chr19:7267393-7275225	Young	Old	OK	5.19045	3.98555	-0.38108	-1.39668	0.0162	0.368022
Cckbr	Cckbr	chr7:105425730-105436339	Young	Old	OK	5.73511	4.40764	-0.379816	-1.46366	0.00995	0.260784
Grin2b	Grin2b	chr6:135729804-136173511	Young	Old	OK	16.5901	12.7672	-0.377879	-1.55705	0.0039	0.140727
Rps6ka2	Rps6ka2	chr17:7170114-7303316	Young	Old	OK	12.2529	9.44415	-0.375626	-1.18027	0.0385	0.613942
Nr4a2	Nr4a2	chr2:57107225-57124003	Young	Old	OK	30.9027	23.8993	-0.370764	-1.85315	0.00155	0.0742278
Osbpl10	Osbpl10	chr9:115016662-115232223	Young	Old	OK	9.56949	7.40235	-0.370458	-1.49856	0.00925	0.249172
Marcksl1	Marcksl1	chr4:129513580-129515981	Young	Old	OK	33.6169	26.0331	-0.368837	-1.74737	0.00225	0.0948668
Slc25a30	Slc25a30	chr14:75761998-75787037	Young	Old	OK	4.60268	3.56492	-0.368604	-1.17797	0.038	0.609099
Tbr1	Tbr1	chr2:61804452-61814113	Young	Old	OK	15.554	12.0861	-0.363941	-1.79248	0.00165	0.0771127
Dpysl3	Dpysl3	chr18:43320978-43438286	Young	Old	OK	13.6356	10.6056	-0.362554	-1.79022	0.0017	0.0780391
Mef2c	Mef2c	chr13:83504033-83667079	Young	Old	OK	33.5592	26.1779	-0.358363	-1.81378	0.0019	0.0856988
Tenm1	Tenm1	chrX:42532392-43429126	Young	Old	OK	4.32692	3.3753	-0.358324	-1.52694	0.0074	0.216638
Tctn2	Tctn2	chr5:124598748-124627738	Young	Old	OK	8.21834	6.41486	-0.35743	-1.22877	0.0335	0.563
Lzts1	Lzts1	chr8:69135502-69140953	Young	Old	OK	17.4363	13.6131	-0.357097	-1.59404	0.0055	0.177787
Gnb4	Gnb4	chr3:32583527-32616535	Young	Old	OK	4.93138	3.85223	-0.356296	-1.34852	0.0176	0.381932
Ptchd4	Ptchd4	chr17:42315946-42507741	Young	Old	OK	1.15017	0.898829	-0.355735	-1.08782	0.04305	0.658092
Ankrd63	Ankrd63	chr2:118699102-118703963	Young	Old	OK	6.4624	5.05497	-0.354368	-1.59931	0.00555	0.178289
Helz	Helz	chr11:107531756-107686943	Young	Old	OK	6.71683	5.2544	-0.354254	-1.28932	0.02485	0.476318
Tox3	Tox3	chr8:90247111-90348252	Young	Old	OK	3.77131	2.95687	-0.350998	-1.28557	0.02395	0.466844
Epha6	Epha6	chr16:59613320-60605531	Young	Old	OK	17.8382	13.9869	-0.350897	-1.39055	0.0169	0.375136
Klf10	Klf10	chr15:38291463-38300711	Young	Old	OK	14.0383	11.0316	-0.34773	-1.63637	0.004	0.142676
Chrm4	Chrm4	chr2:91922188-91932297	Young	Old	OK	12.1106	9.57508	-0.338912	-1.3006	0.02605	0.486156
Plcxd2	Plcxd2	chr16:45959260-46010413	Young	Old	OK	9.21966	7.28998	-0.338799	-1.66804	0.00255	0.104121
Tenm3	Tenm3	chr8:48225664-48674690	Young	Old	OK	15.6436	12.3797	-0.337592	-1.69763	0.00295	0.116173
Usp29	Usp29	chr7:6730582-6977420	Young	Old	OK	6.91928	5.48378	-0.33545	-1.40305	0.01655	0.371621
Grin3a	Grin3a	chr4:49661610-49845769	Young	Old	OK	8.33644	6.62494	-0.331524	-1.6404	0.00425	0.14852
Slc17a6	Slc17a6	chr7:51621829-51671126	Young	Old	OK	7.38051	5.87703	-0.328634	-1.47879	0.00895	0.245784
Klhl11	Klhl11	chr11:100462611-100472782	Young	Old	OK	20.5609	16.4067	-0.325612	-1.55898	0.0065	0.200505
2018-03-09	2018-03-09	chr10:127056049-127060184	Young	Old	OK	10.313	8.24307	-0.323206	-1.34027	0.01945	0.407819
Meis2	Meis2	chr2:116065344-116065832	Young	Old	OK	13.8092	11.0376	-0.323202	-1.5937	0.0058	0.185552
Lbp	Lbp	chr2:158306492-158332852	Young	Old	OK	4.83288	3.86343	-0.322998	-1.13315	0.0483	0.703023
Dpp10	Dpp10	chr1:123332137-124045559	Young	Old	OK	16.0225	12.8197	-0.321735	-1.58447	0.00535	0.175128
Tmem132e	Tmem132e	chr11:82388899-82446361	Young	Old	OK	3.23154	2.58575	-0.321642	-1.21876	0.0318	0.547016
Cux2	Cux2	chr5:121860215-122049851	Young	Old	OK	9.06139	7.2543	-0.320896	-1.13193	0.0465	0.690669
Myo16	Myo16	chr8:10153910-10634742	Young	Old	OK	4.59275	3.6779	-0.320476	-1.4367	0.0125	0.306398
Plxnd1	Plxnd1	chr6:115954810-115995005	Young	Old	OK	6.39643	5.12769	-0.318958	-1.50554	0.00845	0.237518
Dpysl5	Dpysl5	chr5:30711563-30799369	Young	Old	OK	7.90561	6.33848	-0.31874	-1.36299	0.01615	0.367424
Sstr4	Sstr4	chr2:148395376-148396764	Young	Old	OK	19.1916	15.4053	-0.317044	-1.36899	0.017	0.375744
AK135172	AK135172	chr1:3205903-3671498	Young	Old	OK	8.94447	7.1814	-0.316732	-1.16491	0.04355	0.662472
AI414108	AI414108	chr9:27352684-27357543	Young	Old	OK	4.17117	3.3577	-0.31298	-1.30441	0.02365	0.463911
Zcchc12	Zcchc12	chrX:36195903-36199158	Young	Old	OK	30.048	24.2697	-0.30811	-1.37917	0.01635	0.368731
Cpne5	Cpne5	chr17:29156520-29237790	Young	Old	OK	7.35447	5.94088	-0.307945	-1.38857	0.0142	0.331319
Tmem132a	Tmem132a	chr19:10842543-10869779	Young	Old	OK	50.699	40.998	-0.306403	-1.54511	0.0075	0.21833
Igsf21	Igsf21	chr4:140026851-140246811	Young	Old	OK	16.0031	12.9412	-0.306382	-1.37916	0.0172	0.37801
Pgap1	Pgap1	chr1:54472999-54557694	Young	Old	OK	4.07039	3.29461	-0.305059	-1.44315	0.01165	0.293921
Kcnf1	Kcnf1	chr12:17172099-17176888	Young	Old	OK	23.1876	18.7843	-0.30383	-1.53825	0.00715	0.212528
Garnl3	Garnl3	chr2:32986365-33131436	Young	Old	OK	8.91271	7.22684	-0.302499	-1.36463	0.0176	0.381932
Gpr26	Gpr26	chr7:131966459-131985633	Young	Old	OK	15.3249	12.4325	-0.301763	-1.4234	0.01345	0.321062
Aff2	Aff2	chrX:69360330-69868037	Young	Old	OK	3.34667	2.7157	-0.301402	-1.18285	0.0392	0.62064
Prkar2b	Prkar2b	chr12:31958475-32061279	Young	Old	OK	13.1462	10.6963	-0.297536	-1.38553	0.01615	0.367424
Hecw1	Hecw1	chr13:14226437-14523226	Young	Old	OK	7.4635	6.0789	-0.296043	-1.40722	0.01575	0.359907
Homer1	Homer1	chr13:93304494-93405129	Young	Old	OK	36.293	29.5871	-0.29472	-1.25203	0.02705	0.496696
Hs6st3	Hs6st3	chr14:119138264-119869815	Young	Old	OK	11.1869	9.12497	-0.293919	-1.20848	0.03525	0.579385
L1cam	L1cam	chrX:73853779-73880834	Young	Old	OK	29.5674	24.1299	-0.293182	-1.4927	0.0098	0.259041
Tbc1d9	Tbc1d9	chr8:83165351-83272940	Young	Old	OK	25.4409	20.7629	-0.293144	-1.49595	0.0091	0.248584
Zdhhc2	Zdhhc2	chr8:40423814-40484842	Young	Old	OK	20.7396	16.9287	-0.292914	-1.40718	0.014	0.329627
Grm2	Grm2	chr9:106644533-106656109	Young	Old	OK	22.2353	18.158	-0.292242	-1.43901	0.0123	0.303413
Nlgn3	Nlgn3	chrX:101274090-101321350	Young	Old	OK	29.4168	24.0923	-0.288069	-1.22126	0.03405	0.567476
Cdh6	Cdh6	chr15:13028698-13173675	Young	Old	OK	1.90131	1.55769	-0.287582	-1.13578	0.0461	0.687116
Ndst4	Ndst4	chr3:125404090-125724986	Young	Old	OK	6.70707	5.4998	-0.286304	-1.17339	0.0416	0.643929
Fnbp1l	Fnbp1l	chr3:122538718-122619714	Young	Old	OK	8.29149	6.80237	-0.285594	-1.35408	0.0198	0.412926
Grik3	Grik3	chr4:125490830-125714173	Young	Old	OK	8.27873	6.79397	-0.285154	-1.426	0.0135	0.32176
Arhgap32	Arhgap32	chr9:32116135-32265511	Young	Old	OK	25.1118	20.6115	-0.284912	-1.43396	0.0142	0.331319
Gap43	Gap43	chr16:42248560-42340651	Young	Old	OK	137.795	113.17	-0.284034	-1.43528	0.01335	0.319166
Foxo6	Foxo6	chr4:120267077-120287261	Young	Old	OK	12.1483	9.9861	-0.282767	-1.27078	0.0295	0.527329
Pvrl1	Pvrl1	chr9:43744575-43807461	Young	Old	OK	14.8645	12.2205	-0.282564	-1.40589	0.01335	0.319166
D430041D05Rik	D430041D05Rik	chr2:104143074-104410334	Young	Old	OK	23.9437	19.7154	-0.280326	-1.38685	0.0155	0.355766
Prss12	Prss12	chr3:123446912-123506602	Young	Old	OK	6.60369	5.43772	-0.280272	-1.12775	0.04785	0.701077
Olfm2	Olfm2	chr9:20667985-20728214	Young	Old	OK	28.1187	23.1545	-0.280236	-1.31005	0.0241	0.469179
Nptx2	Nptx2	chr5:144545886-144557478	Young	Old	OK	13.2885	10.9427	-0.280208	-1.27732	0.02555	0.481694
Pom121	Pom121	chr5:135369952-135394546	Young	Old	OK	18.1862	14.9845	-0.279369	-1.36615	0.01835	0.392715
Lmtk2	Lmtk2	chr5:144100435-144188204	Young	Old	OK	24.0757	19.8574	-0.277904	-1.4145	0.0133	0.318953
Ncan	Ncan	chr8:70093084-70120844	Young	Old	OK	39.7593	32.7973	-0.277713	-1.38826	0.01515	0.349283
Nav3	Nav3	chr10:109683438-110000219	Young	Old	OK	8.97611	7.4061	-0.277376	-1.33966	0.01995	0.413277
Pitpnm3	Pitpnm3	chr11:72047527-72135889	Young	Old	OK	10.3953	8.58013	-0.276865	-1.37426	0.01705	0.376313
Pgpep1	Pgpep1	chr8:70646435-70659738	Young	Old	OK	3.9884	3.29303	-0.276395	-1.15492	0.04665	0.690669
Slc35f1	Slc35f1	chr10:52690500-53111622	Young	Old	OK	13.3848	11.0514	-0.276363	-1.37122	0.01685	0.3751
Cntnap4	Cntnap4	chr8:112570042-112882707	Young	Old	OK	7.62125	6.29402	-0.276046	-1.28573	0.0228	0.454127
Arntl	Arntl	chr7:113207464-113314126	Young	Old	OK	14	11.5738	-0.274558	-1.1825	0.0396	0.623945
Raph1	Raph1	chr1:60483184-60566765	Young	Old	OK	7.18611	5.94798	-0.272812	-1.35107	0.0183	0.392186
Paqr9	Paqr9	chr9:95559816-95562121	Young	Old	OK	17.5506	14.5317	-0.27231	-1.27408	0.0281	0.508158
Cdkl4	Cdkl4	chr17:80523549-80563834	Young	Old	OK	8.05002	6.67308	-0.27064	-1.16437	0.04395	0.665946
Hrk	Hrk	chr5:118169763-118189478	Young	Old	OK	13.0688	10.844	-0.269228	-1.2542	0.02265	0.4523
Tmem130	Tmem130	chr5:144735914-144761578	Young	Old	OK	79.7018	66.1529	-0.268808	-1.36058	0.0193	0.407427
Epha5	Epha5	chr5:84054764-84417382	Young	Old	OK	29.246	24.2846	-0.268198	-1.23943	0.0298	0.529641
Adamts3	Adamts3	chr5:89673840-89883334	Young	Old	OK	2.67378	2.22244	-0.266737	-1.1212	0.0498	0.711507
Slc29a4	Slc29a4	chr5:142702100-142722490	Young	Old	OK	13.4542	11.1908	-0.265741	-1.2247	0.0336	0.563
Pcdh7	Pcdh7	chr5:57570083-58133235	Young	Old	OK	13.8725	11.5437	-0.26512	-1.32187	0.02415	0.469563
Necab1	Necab1	chr4:14930640-15149131	Young	Old	OK	24.0831	20.0535	-0.264166	-1.32999	0.0196	0.409857
Nova2	Nova2	chr7:18925887-18965319	Young	Old	OK	17.9417	14.9437	-0.26378	-1.34251	0.01845	0.393769
Cdh10	Cdh10	chr15:18818946-19014236	Young	Old	OK	13.3201	11.0988	-0.263199	-1.24382	0.0314	0.542542
Rab3b	Rab3b	chr4:108879069-108972077	Young	Old	OK	19.054	15.8856	-0.262377	-1.29676	0.0208	0.425208
Ttc9b	Ttc9b	chr7:27653923-27656207	Young	Old	OK	56.7289	47.3309	-0.261302	-1.23458	0.03285	0.55827
Zswim6	Zswim6	chr13:107724616-107890064	Young	Old	OK	7.75581	6.48239	-0.258752	-1.1467	0.04375	0.664212
Gng4	Gng4	chr13:13784058-13827895	Young	Old	OK	13.2708	11.0977	-0.257995	-1.19702	0.03595	0.587158
Hs6st2	Hs6st2	chrX:51386636-51681602	Young	Old	OK	9.41346	7.87576	-0.257307	-1.22033	0.0336	0.563
Cntnap2	Cntnap2	chr6:45060060-47301371	Young	Old	OK	20.4406	17.1067	-0.256883	-1.22844	0.0314	0.542542
Nrep	Nrep	chr18:33437018-33464029	Young	Old	OK	28.5525	23.902	-0.256485	-1.25619	0.0289	0.518996
Mn1	Mn1	chr5:111418165-111457025	Young	Old	OK	6.58116	5.50982	-0.256337	-1.21123	0.0364	0.590777
Gpr161	Gpr161	chr1:165295765-165326745	Young	Old	OK	14.1261	11.8274	-0.256226	-1.28385	0.0267	0.493523
Chl1	Chl1	chr6:103510875-103750202	Young	Old	OK	40.9474	34.3159	-0.254898	-1.20504	0.03445	0.571075
Dcc	Dcc	chr18:71253631-72351069	Young	Old	OK	4.54479	3.81001	-0.254419	-1.21749	0.02865	0.5157
Lnpep	Lnpep	chr17:17527722-17624611	Young	Old	OK	13.2615	11.1247	-0.25347	-1.24591	0.0277	0.503861
Slc39a10	Slc39a10	chr1:46807543-46853509	Young	Old	OK	35.6602	29.9235	-0.253035	-1.29049	0.0234	0.46134
Dbpht2	Dbpht2	chr12:74297473-74300468	Young	Old	OK	10.7377	9.01647	-0.252055	-1.14339	0.04705	0.693284
Cbx4	Cbx4	chr11:119077570-119086237	Young	Old	OK	10.8709	9.12973	-0.251827	-1.24496	0.0315	0.543664
Xylt1	Xylt1	chr7:117380978-117667630	Young	Old	OK	9.88263	8.30047	-0.251701	-1.13268	0.04785	0.701077
Tshz2	Tshz2	chr2:169633645-170071816	Young	Old	OK	26.1103	21.9703	-0.249066	-1.17804	0.0392	0.62064
Sema6a	Sema6a	chr18:47245253-47368870	Young	Old	OK	4.55624	3.83456	-0.248782	-1.13122	0.04905	0.709282
Cdr1	Cdr1	chrX:61183245-61185558	Young	Old	OK	24.8163	20.8983	-0.247906	-1.20051	0.03755	0.603132
Hdac9	Hdac9	chr12:34047581-34917095	Young	Old	OK	11.1668	9.40842	-0.24719	-1.15421	0.04665	0.690669
Cdh13	Cdh13	chr8:118283610-119324927	Young	Old	OK	17.1431	14.4523	-0.24633	-1.21548	0.0365	0.591163
Nrip1	Nrip1	chr16:76290861-76373827	Young	Old	OK	9.73944	8.21233	-0.246049	-1.14458	0.04755	0.699323
Pgm2l1	Pgm2l1	chr7:100227606-100278872	Young	Old	OK	73.0216	61.6702	-0.243751	-1.14176	0.04405	0.66681
Syt5	Syt5	chr7:4539764-4546567	Young	Old	OK	83.1866	70.2749	-0.243341	-1.23973	0.0279	0.506035
Negr1	Negr1	chr3:156561793-157316464	Young	Old	OK	39.7897	33.6204	-0.24306	-1.22138	0.03295	0.558746
Fstl5	Fstl5	chr3:76074560-76710005	Young	Old	OK	7.21741	6.10415	-0.241691	-1.11364	0.04975	0.711448
Htr2c	Htr2c	chrX:146962512-147197277	Young	Old	OK	15.0544	12.7388	-0.240957	-1.1991	0.03645	0.59097
Slc4a8	Slc4a8	chr15:100761746-100823971	Young	Old	OK	13.4191	11.3662	-0.239538	-1.21523	0.0336	0.563
Bcl9l	Bcl9l	chr9:44483112-44510412	Young	Old	OK	10.5849	8.97441	-0.238112	-1.13175	0.04935	0.71031
Map3k9	Map3k9	chr12:81714949-81781170	Young	Old	OK	7.06262	5.99594	-0.236216	-1.13676	0.048	0.702019
Adgrl3	Adgrl3	chr5:81020570-81795730	Young	Old	OK	29.4866	25.035	-0.236112	-1.13508	0.0485	0.705273
Zmat3	Zmat3	chr3:32334793-32367438	Young	Old	OK	13.8168	11.7409	-0.234872	-1.16737	0.0413	0.642739
Abcg4	Abcg4	chr9:44273189-44288244	Young	Old	OK	21.6361	18.386	-0.234828	-1.15785	0.0459	0.687116
Stx1a	Stx1a	chr5:135023481-135051100	Young	Old	OK	54.1871	46.0997	-0.233192	-1.18394	0.0392	0.62064
Hcn1	Hcn1	chr13:117602319-117981028	Young	Old	OK	17.0319	14.491	-0.233088	-1.18409	0.03735	0.600542
Nr4a3	Nr4a3	chr4:48045304-48086446	Young	Old	OK	25.8339	22.0032	-0.231547	-1.17018	0.04175	0.643929
Arpp21	Arpp21	chr9:112065090-112348925	Young	Old	OK	50.9265	43.3776	-0.231467	-1.13364	0.04675	0.690831
Tbl1xr1	Tbl1xr1	chr3:22076651-22216594	Young	Old	OK	13.0118	11.0864	-0.231033	-1.16794	0.0425	0.654196
Dner	Dner	chr1:84369838-84696221	Young	Old	OK	54.2161	46.2059	-0.230643	-1.16865	0.03985	0.62519
Peg3	Peg3	chr7:6705959-6730419	Young	Old	OK	36.0952	30.7912	-0.229288	-1.14377	0.04375	0.664212
Kdm5b	Kdm5b	chr1:134560177-134632878	Young	Old	OK	16.1101	13.7674	-0.226714	-1.1397	0.04605	0.687116
Tnik	Tnik	chr3:28263213-28670585	Young	Old	OK	22.9237	19.5931	-0.226492	-1.13994	0.0461	0.687116
Brinp2	Brinp2	chr1:158245268-158356260	Young	Old	OK	23.8675	20.4454	-0.223272	-1.13315	0.04955	0.710552
Cacna2d3	Cacna2d3	chr14:28904942-29721864	Young	Old	OK	31.3258	26.862	-0.221783	-1.12873	0.04715	0.694098
Marcks	Marcks	chr10:37133242-37138926	Young	Old	OK	40.0054	34.3128	-0.221448	-1.12192	0.04915	0.709468
Per1	Per1	chr11:69095253-69109957	Young	Old	OK	23.0289	19.7546	-0.221258	-1.12242	0.04905	0.709282
Gabra3	Gabra3	chrX:72432675-72656246	Young	Old	OK	24.9399	21.4071	-0.220361	-1.11145	0.04855	0.705339
Atp1b3	Atp1b3	chr9:96332656-96364299	Young	Old	OK	40.7164	47.5757	0.224613	1.11448	0.0499	0.71228
Snx1	Snx1	chr9:66088126-66126587	Young	Old	OK	34.6733	40.5317	0.225227	1.13224	0.0482	0.702886
Ctsl	Ctsl	chr13:64361889-64370520	Young	Old	OK	19.9904	23.3988	0.227124	1.1423	0.0457	0.686515
Slc38a3	Slc38a3	chr9:107651154-107668968	Young	Old	OK	29.0697	34.035	0.227503	1.1446	0.04455	0.67241
Sepp1	Sepp1	chr15:3270766-3280508	Young	Old	OK	160.202	187.794	0.22926	1.13802	0.04585	0.687116
Grn	Grn	chr11:102430321-102436809	Young	Old	OK	30.9748	36.4607	0.235251	1.18195	0.03615	0.589184
Qdpr	Qdpr	chr5:45434031-45450229	Young	Old	OK	160.33	189.087	0.238009	1.19831	0.0373	0.60036
Crot	Crot	chr5:8966047-8997146	Young	Old	OK	12.144	14.3375	0.239556	1.12378	0.04805	0.702019
Mir124a-1hg	Mir124a-1hg	chr14:64588114-64593961	Young	Old	OK	13.2226	15.625	0.24085	1.16124	0.0423	0.651764
Hexa	Hexa	chr9:59539666-59565105	Young	Old	OK	31.0444	36.7878	0.244893	1.21212	0.03395	0.567027
Clic4	Clic4	chr4:135213969-135272760	Young	Old	OK	26.3684	31.2787	0.24637	1.2545	0.02795	0.506035
Gab2	Gab2	chr7:97081750-97308951	Young	Old	OK	4.89978	5.82569	0.249712	1.16031	0.04125	0.642605
Lamp2	Lamp2	chrX:38401356-38456460	Young	Old	OK	39.6309	47.1351	0.250177	1.18309	0.04165	0.643929
Bhlhe41	Bhlhe41	chr6:145858242-145865420	Young	Old	OK	7.09398	8.44393	0.25132	1.22017	0.03395	0.567027
Csf1r	Csf1r	chr18:61105571-61131139	Young	Old	OK	33.4786	39.872	0.252137	1.28882	0.02475	0.476318
Cdc42ep1	Cdc42ep1	chr15:78842646-78855529	Young	Old	OK	9.52972	11.3525	0.252506	1.1225	0.04805	0.702019
Cd82	Cd82	chr2:93419101-93469874	Young	Old	OK	17.2462	20.5524	0.253028	1.13947	0.0469	0.692389
Npc2	Npc2	chr12:84754558-84773112	Young	Old	OK	21.1374	25.2294	0.25531	1.27832	0.02485	0.476318
Car2	Car2	chr3:14886425-14900770	Young	Old	OK	122.34	146.051	0.255568	1.28398	0.0267	0.493523
Nrbp2	Nrbp2	chr15:76085593-76091626	Young	Old	OK	46.9218	56.0767	0.257141	1.18692	0.03895	0.618575
Scara3	Scara3	chr14:65919394-65953744	Young	Old	OK	11.2869	13.4892	0.257149	1.23188	0.0324	0.552683
Pecam1	Pecam1	chr11:106654212-106750628	Young	Old	OK	7.36981	8.81057	0.257607	1.15431	0.04295	0.65786
Mag	Mag	chr7:30899182-30914832	Young	Old	OK	90.311	108.002	0.25809	1.2958	0.02505	0.476318
Vcam1	Vcam1	chr3:116110019-116129688	Young	Old	OK	10.9675	13.1167	0.258158	1.19416	0.0395	0.623945
Phldb1	Phldb1	chr9:44686307-44735198	Young	Old	OK	26.688	31.9352	0.258956	1.24933	0.02855	0.515095
AK202301	AK202301	chr6:83341152-83343693	Young	Old	OK	9.43668	11.3143	0.261797	1.16764	0.0406	0.63439
Adamts1	Adamts1	chr16:85793827-85803113	Young	Old	OK	5.56353	6.67362	0.262469	1.18205	0.04115	0.641692
Stat3	Stat3	chr11:100886805-100939540	Young	Old	OK	14.8935	17.8709	0.262924	1.31579	0.0205	0.421675
Lgi4	Lgi4	chr7:31059934-31076697	Young	Old	OK	14.4339	17.3786	0.267846	1.30781	0.02135	0.432463
Myo1d	Myo1d	chr11:80482126-80780025	Young	Old	OK	4.93424	5.9411	0.267902	1.21156	0.034	0.567252
Micall1	Micall1	chr15:79108982-79141251	Young	Old	OK	11.6231	14.0036	0.268807	1.24258	0.03175	0.546762
Tmem88b	Tmem88b	chr4:155781590-155785874	Young	Old	OK	28.5997	34.5055	0.270824	1.36108	0.017	0.375744
Oxsr1	Oxsr1	chr9:119238432-119322427	Young	Old	OK	12.835	15.4994	0.272132	1.35105	0.01855	0.394817
Ucp2	Ucp2	chr7:100493357-100499629	Young	Old	OK	19.71	23.8036	0.272255	1.25015	0.0288	0.517799
Txnip	Txnip	chr3:96555767-96566801	Young	Old	OK	12.9236	15.6201	0.273387	1.29138	0.02495	0.476318
Slc7a11	Slc7a11	chr3:50364935-50443613	Young	Old	OK	6.88801	8.32516	0.273389	1.35543	0.0179	0.386281
Rasgrp3	Rasgrp3	chr17:75435904-75529053	Young	Old	OK	3.83327	4.63636	0.274418	1.15979	0.0416	0.643929
Plce1	Plce1	chr19:38524196-38785100	Young	Old	OK	2.03678	2.46552	0.275603	1.17853	0.03955	0.623945
Cd151	Cd151	chr7:141461093-141471481	Young	Old	OK	12.8834	15.6041	0.276409	1.17311	0.043	0.657976
Hspb8	Hspb8	chr5:116408490-116422864	Young	Old	OK	11.8669	14.389	0.27802	1.20783	0.03525	0.579385
Rreb1	Rreb1	chr13:37826037-37952005	Young	Old	OK	3.7022	4.48967	0.278225	1.16459	0.04325	0.660499
Cryab	Cryab	chr9:50751071-50756635	Young	Old	OK	121.503	147.419	0.278926	1.40472	0.0141	0.330477
Dcn	Dcn	chr10:97479499-97518163	Young	Old	OK	31.9437	38.8819	0.283564	1.40494	0.01375	0.326715
Leng8	Leng8	chr7:4137055-4148173	Young	Old	OK	18.2958	22.2729	0.283777	1.33215	0.0174	0.380251
Prr18	Prr18	chr17:8340405-8344113	Young	Old	OK	19.0482	23.1926	0.284016	1.40491	0.0138	0.326902
Olfml1	Olfml1	chr7:107567432-107591365	Young	Old	OK	8.17619	9.9586	0.284513	1.17146	0.03965	0.623945
Pcsk6	Pcsk6	chr7:65862135-66050386	Young	Old	OK	8.03484	9.79345	0.285547	1.34968	0.01985	0.413277
Adgrl4	Adgrl4	chr3:151437881-151545081	Young	Old	OK	6.35538	7.74722	0.2857	1.29774	0.0243	0.470123
Plxnb3	Plxnb3	chrX:73757059-73772510	Young	Old	OK	4.68813	5.71889	0.286721	1.30562	0.0234	0.46134
Podxl	Podxl	chr6:31519492-31563937	Young	Old	OK	8.30412	10.1527	0.289971	1.40694	0.0139	0.32777
Gpr108	Gpr108	chr17:57234914-57247689	Young	Old	OK	8.81685	10.7806	0.290106	1.23605	0.0311	0.540973
Pnisr	Pnisr	chr4:21846326-21876475	Young	Old	OK	22.4696	27.4792	0.290368	1.4196	0.0121	0.30039
Plin3	Plin3	chr17:56278961-56290511	Young	Old	OK	10.2831	12.5758	0.290381	1.27222	0.02705	0.496696
Sspn	Sspn	chr6:145931872-145965225	Young	Old	OK	3.55737	4.35101	0.290542	1.20537	0.0349	0.576686
Pnpla7	Pnpla7	chr2:24976032-25054072	Young	Old	OK	5.58069	6.84325	0.294239	1.13883	0.0477	0.700865
Klhl4	Klhl4	chrX:114474332-114561129	Young	Old	OK	4.61716	5.6652	0.295121	1.24304	0.02955	0.527615
Pdlim2	Pdlim2	chr14:70164217-70177672	Young	Old	OK	10.2693	12.6021	0.295331	1.19497	0.03825	0.611212
Mtus1	Mtus1	chr8:40990911-41133726	Young	Old	OK	10.8048	13.2612	0.295537	1.43714	0.01295	0.313467
Ampd3	Ampd3	chr7:110768205-110812408	Young	Old	OK	5.92045	7.27147	0.29654	1.30674	0.02365	0.463911
Vasp	Vasp	chr7:19256929-19271854	Young	Old	OK	5.55743	6.82698	0.29683	1.12794	0.049	0.709282
Ehd4	Ehd4	chr2:120089178-120154575	Young	Old	OK	3.94243	4.84656	0.297876	1.1611	0.04265	0.655205
Tpm4	Tpm4	chr8:72135291-72153129	Young	Old	OK	10.6125	13.075	0.301047	1.31926	0.02175	0.437708
Ftl1	Ftl1	chr7:45457943-45459886	Young	Old	OK	63.8345	78.653	0.301166	1.48486	0.0095	0.254141
Cstb	Cstb	chr10:78425669-78427622	Young	Old	OK	33.028	40.7371	0.302653	1.22436	0.03445	0.571075
Zfp36l2	Zfp36l2	chr17:84183927-84187947	Young	Old	OK	5.73944	7.07911	0.302658	1.31802	0.02185	0.439151
Fn1	Fn1	chr1:71585472-71662843	Young	Old	OK	9.79883	12.0959	0.30384	1.43025	0.0118	0.29626
Nes	Nes	chr3:87971092-87980451	Young	Old	OK	2.74412	3.38784	0.304021	1.23456	0.0277	0.503861
Padi2	Padi2	chr4:140906359-140957902	Young	Old	OK	11.976	14.7874	0.304224	1.4872	0.00915	0.249073
Sdf2l1	Sdf2l1	chr16:17130137-17132383	Young	Old	OK	11.0463	13.6398	0.304265	1.14663	0.04665	0.690669
Flna	Flna	chrX:74223460-74246534	Young	Old	OK	7.01607	8.66493	0.304526	1.50741	0.0087	0.241916
Gltp	Gltp	chr5:114669499-114690935	Young	Old	OK	30.1134	37.2029	0.305009	1.47411	0.00855	0.239462
Plekhb1	Plekhb1	chr7:100643895-100662394	Young	Old	OK	215.186	266.29	0.307415	1.47682	0.0103	0.266803
Parvg	Parvg	chr15:84324719-84342978	Young	Old	OK	5.03247	6.23121	0.308246	1.22966	0.0291	0.521381
Ptprb	Ptprb	chr10:116275522-116389538	Young	Old	OK	4.6252	5.72839	0.308613	1.50707	0.00775	0.222683
Jag1	Jag1	chr2:137081450-137116520	Young	Old	OK	1.58508	1.96379	0.309083	1.11714	0.0478	0.701077
Rgl2	Rgl2	chr17:33929893-33937687	Young	Old	OK	6.84538	8.48996	0.310627	1.33348	0.0213	0.432014
Gatm	Gatm	chr2:122594472-122611277	Young	Old	OK	59.5449	73.8616	0.310846	1.55633	0.0062	0.19356
Aldh1a1	Aldh1a1	chr19:20601981-20643462	Young	Old	OK	24.1092	29.9196	0.311509	1.52526	0.00755	0.218964
Ctnnal1	Ctnnal1	chr4:56810934-56865211	Young	Old	OK	3.95164	4.90622	0.312162	1.26354	0.0308	0.539382
Klf2	Klf2	chr8:72319061-72321654	Young	Old	OK	5.78636	7.18905	0.313144	1.16799	0.03965	0.623945
Fth1	Fth1	chr19:9980599-9985111	Young	Old	OK	1216.21	1511.07	0.313168	1.2333	0.0329	0.558508
Icosl	Icosl	chr10:78069367-78079525	Young	Old	OK	5.42838	6.74462	0.313215	1.27535	0.02625	0.488363
Snhg11	Snhg11	chr2:158375637-158386145	Young	Old	OK	66.8195	83.0766	0.314173	1.45367	0.0119	0.29685
Eng	Eng	chr2:32646594-32694175	Young	Old	OK	8.65767	10.7717	0.315195	1.3664	0.0181	0.388437
Rassf2	Rassf2	chr2:131992849-132029988	Young	Old	OK	16.4152	20.4261	0.315376	1.59041	0.00555	0.178289
Olfml3	Olfml3	chr3:103735393-103738001	Young	Old	OK	17.4182	21.7897	0.323056	1.47928	0.0099	0.260784
Etnppl	Etnppl	chr3:130617447-130635750	Young	Old	OK	5.79234	7.25004	0.323842	1.31572	0.02305	0.456178
Col1a1	Col1a1	chr11:94936223-94953042	Young	Old	OK	1.94371	2.43386	0.324433	1.24158	0.02985	0.529923
Tcn2	Tcn2	chr11:3917077-3932078	Young	Old	OK	13.5797	17.0082	0.324778	1.47917	0.01085	0.277345
Man2b1	Man2b1	chr8:85083268-85098739	Young	Old	OK	12.5224	15.6856	0.324931	1.60829	0.00425	0.14852
Cd109	Cd109	chr9:78615545-78716260	Young	Old	OK	1.3925	1.74572	0.326138	1.15888	0.04015	0.628625
Ginm1	Ginm1	chr10:7767946-7781356	Young	Old	OK	8.49334	10.6599	0.327793	1.14592	0.04655	0.690669
Cd63	Cd63	chr10:128908918-128912818	Young	Old	OK	24.421	30.6605	0.32826	1.3937	0.0169	0.375136
Dlk1	Dlk1	chr12:109452822-109463336	Young	Old	OK	4.0073	5.0333	0.328875	1.38439	0.0166	0.371668
Smoc1	Smoc1	chr12:81026807-81186414	Young	Old	OK	5.97119	7.50181	0.329221	1.44455	0.0133	0.318953
Scpep1	Scpep1	chr11:88905927-88955442	Young	Old	OK	7.084	8.90185	0.329541	1.34043	0.01635	0.368731
Ptgs2	Ptgs2	chr1:150100030-150108234	Young	Old	OK	5.88778	7.40193	0.330178	1.49653	0.0079	0.225739
Bcat2	Bcat2	chr7:45567794-45589710	Young	Old	OK	5.05524	6.36084	0.331437	1.15991	0.04165	0.643929
Rhoc	Rhoc	chr3:104789033-104794459	Young	Old	OK	11.6249	14.6311	0.331817	1.2594	0.02705	0.496696
Stxbp3	Stxbp3	chr3:108793179-108840502	Young	Old	OK	6.06867	7.6408	0.332344	1.32229	0.0209	0.42669
Cd83	Cd83	chr13:43785111-43803133	Young	Old	OK	7.3122	9.23304	0.3365	1.38979	0.016	0.365082
Fyco1	Fyco1	chr9:123789499-123851899	Young	Old	OK	6.52896	8.24559	0.33677	1.22812	0.0348	0.575647
Pan2	Pan2	chr10:128303334-128321358	Young	Old	OK	3.70632	4.68352	0.337607	1.15737	0.046	0.687116
Apln	Apln	chrX:48025145-48034852	Young	Old	OK	8.11269	10.2537	0.337893	1.52143	0.0089	0.245716
Ddr2	Ddr2	chr1:169969408-170110730	Young	Old	OK	1.81826	2.29817	0.337927	1.38366	0.01805	0.3879
Igfbp6	Igfbp6	chr15:102144185-102149512	Young	Old	OK	10.6034	13.411	0.338888	1.3276	0.02295	0.454779
Vwa5a	Vwa5a	chr9:38718267-38743337	Young	Old	OK	5.77019	7.30506	0.340277	1.53401	0.00765	0.220627
Serpinb9	Serpinb9	chr13:33004540-33017955	Young	Old	OK	3.13623	3.97115	0.340526	1.29739	0.0252	0.477999
Acvrl1	Acvrl1	chr15:101128521-101145336	Young	Old	OK	3.9747	5.03647	0.341567	1.38376	0.0174	0.380251
Elovl1	Elovl1	chr4:118428092-118437343	Young	Old	OK	7.332	9.2933	0.341984	1.21515	0.03455	0.572121
Laptm5	Laptm5	chr4:130913333-130936148	Young	Old	OK	26.4682	33.5699	0.342908	1.63148	0.00445	0.154121
Shtn1	Shtn1	chr19:58973357-59076069	Young	Old	OK	12.3567	15.6746	0.34313	1.5935	0.00515	0.170378
Il18	Il18	chr9:50533086-50581837	Young	Old	OK	14.115	17.915	0.343942	1.16211	0.0438	0.664321
Efemp2	Efemp2	chr19:5474689-5481854	Young	Old	OK	5.92736	7.52434	0.344176	1.2443	0.032	0.548632
Miat	Miat	chr5:112213227-112228948	Young	Old	OK	19.8368	25.1898	0.344656	1.60144	0.0032	0.122294
Mbp	Mbp	chr18:82475122-82585637	Young	Old	OK	1261.49	1602.51	0.345206	1.16827	0.0429	0.657743
Fgd5	Fgd5	chr6:91978964-92076005	Young	Old	OK	1.52105	1.93292	0.345711	1.13863	0.04935	0.71031
Entpd1	Entpd1	chr19:40612365-40741602	Young	Old	OK	3.66901	4.66275	0.34579	1.43544	0.0128	0.310806
As3mt	As3mt	chr19:46707442-46741095	Young	Old	OK	5.81169	7.39483	0.34756	1.2743	0.0269	0.495701
Fxyd1	Fxyd1	chr7:31051677-31055656	Young	Old	OK	83.5605	106.437	0.349112	1.35809	0.01655	0.371621
Slc22a8	Slc22a8	chr19:8591253-8611835	Young	Old	OK	4.68485	5.969	0.349489	1.4429	0.01265	0.309098
Itpripl2	Itpripl2	chr7:118485111-118491975	Young	Old	OK	1.63658	2.08722	0.350898	1.36298	0.0175	0.381899
Flnb	Flnb	chr14:7817956-7951587	Young	Old	OK	5.74429	7.32839	0.351367	1.70289	0.00285	0.113096
Appl2	Appl2	chr10:83600033-83648664	Young	Old	OK	22.3907	28.5671	0.351454	1.75631	0.00215	0.0924083
Prrg1	Prrg1	chrX:78449609-78583897	Young	Old	OK	2.37884	3.03576	0.351803	1.28441	0.02505	0.476318
Btg2	Btg2	chr1:134074864-134079155	Young	Old	OK	6.79158	8.66937	0.352179	1.52052	0.008	0.226925
Il10rb	Il10rb	chr16:91406234-91425834	Young	Old	OK	5.34389	6.83078	0.354162	1.30498	0.0223	0.447037
E4f1	E4f1	chr17:24443777-24457101	Young	Old	OK	5.02382	6.43728	0.357666	1.39622	0.01505	0.348012
Gng11	Gng11	chr6:4003986-4008446	Young	Old	OK	12.1948	15.6425	0.359208	1.27494	0.02555	0.481694
Ctsd	Ctsd	chr7:142375915-142387870	Young	Old	OK	245.008	314.491	0.360188	1.71021	0.0025	0.103717
Vamp8	Vamp8	chr6:72385220-72390667	Young	Old	OK	13.5971	17.468	0.361412	1.28925	0.02425	0.469742
Lhfp	Lhfp	chr3:53041546-53261679	Young	Old	OK	7.97791	10.2502	0.361566	1.50722	0.0092	0.249123
Pls1	Pls1	chr9:95752641-95845279	Young	Old	OK	4.10271	5.27162	0.361667	1.47459	0.0101	0.263381
Wipf1	Wipf1	chr2:73429609-73529487	Young	Old	OK	4.45653	5.73661	0.36428	1.58786	0.00535	0.175128
Kdr	Kdr	chr5:75933269-75978428	Young	Old	OK	3.26889	4.20875	0.364594	1.5511	0.00685	0.207182
Skap2	Skap2	chr6:51859164-52012549	Young	Old	OK	7.76284	9.99735	0.36496	1.42937	0.01305	0.315395
Fbxo32	Fbxo32	chr15:58175878-58214892	Young	Old	OK	3.32584	4.28355	0.365089	1.63343	0.00505	0.16887
Anxa5	Anxa5	chr3:36448923-36475887	Young	Old	OK	29.6535	38.199	0.365336	1.78308	0.002	0.0881591
Oma1	Oma1	chr4:103313845-103366428	Young	Old	OK	2.89112	3.72513	0.365665	1.12437	0.04975	0.711448
Cdh19	Cdh19	chr1:110889194-110977372	Young	Old	OK	2.87556	3.70514	0.365686	1.32053	0.02125	0.431564
Dnajc24	Dnajc24	chr2:105966707-106040627	Young	Old	OK	4.92595	6.35261	0.366948	1.13381	0.0467	0.69075
Mlh1	Mlh1	chr9:111228227-111271608	Young	Old	OK	2.31149	2.9818	0.367364	1.19496	0.0388	0.617457
Clasrp	Clasrp	chr7:19581037-19604486	Young	Old	OK	9.80024	12.653	0.368595	1.46203	0.0117	0.294703
Tinagl1	Tinagl1	chr4:130164453-130175122	Young	Old	OK	4.57671	5.91538	0.370161	1.30962	0.01995	0.413277
Litaf	Litaf	chr16:10959272-10993121	Young	Old	OK	11.1614	14.4267	0.370214	1.65164	0.00375	0.137553
Tmem63a	Tmem63a	chr1:180942517-180975104	Young	Old	OK	11.7929	15.2437	0.370298	1.75884	0.0018	0.0821435
Myl12a	Myl12a	chr17:70993792-71002533	Young	Old	OK	8.34583	10.789	0.37043	1.50434	0.0082	0.231751
Erbb2ip	Erbb2ip	chr13:103818785-103920586	Young	Old	OK	19.8323	25.6754	0.372536	1.83012	0.00115	0.0600788
Adssl1	Adssl1	chr12:112620046-112641355	Young	Old	OK	8.38716	10.8668	0.373669	1.50814	0.00855	0.239462
Pdpn	Pdpn	chr4:143267408-143299564	Young	Old	OK	7.53899	9.771	0.374135	1.50367	0.01035	0.267206
Sat1	Sat1	chrX:155213125-155216449	Young	Old	OK	12.2496	15.8826	0.374707	1.48488	0.0094	0.252774
Fam129b	Fam129b	chr2:32876133-32961255	Young	Old	OK	9.64139	12.5021	0.374855	1.29981	0.02605	0.486156
Dab2	Dab2	chr15:6299788-6440709	Young	Old	OK	2.76465	3.58666	0.375543	1.20843	0.0351	0.579374
Ly6c1	Ly6c1	chr15:75044017-75048837	Young	Old	OK	22.7709	29.5445	0.375701	1.5516	0.0067	0.204238
Abca9	Abca9	chr11:110100821-110168153	Young	Old	OK	1.95692	2.54028	0.376403	1.48618	0.00915	0.249073
Akna	Akna	chr4:63367122-63410714	Young	Old	OK	0.97358	1.26447	0.377157	1.11813	0.0489	0.709096
Fmo5	Fmo5	chr3:97628803-97655287	Young	Old	OK	1.04548	1.35844	0.377786	1.19805	0.03885	0.617619
Arhgap18	Arhgap18	chr10:26772511-26918648	Young	Old	OK	1.58714	2.0633	0.378531	1.21356	0.03435	0.570637
Tns2	Tns2	chr15:102100412-102116401	Young	Old	OK	5.18762	6.75503	0.380889	1.61759	0.00485	0.163593
Synpo2	Synpo2	chr3:123076518-123236149	Young	Old	OK	0.928988	1.21032	0.381658	1.28866	0.0265	0.491247
Cdc42ep2	Cdc42ep2	chr19:5917555-5924816	Young	Old	OK	7.16182	9.33391	0.382155	1.31307	0.0202	0.417341
Ssh3	Ssh3	chr19:4261668-4269172	Young	Old	OK	5.66546	7.38914	0.383212	1.56775	0.00615	0.192386
Dusp12	Dusp12	chr1:170874187-170885540	Young	Old	OK	7.62635	9.95388	0.384267	1.13598	0.0483	0.703023
Hexb	Hexb	chr13:97137936-97198357	Young	Old	OK	74.1909	96.9655	0.386229	1.72889	0.00305	0.118309
Stxbp2	Stxbp2	chr8:3631159-3643644	Young	Old	OK	4.58694	5.99611	0.386494	1.51178	0.00845	0.237518
Cxcl12	Cxcl12	chr6:117168534-117181368	Young	Old	OK	22.6555	29.6158	0.386508	1.47971	0.011	0.279797
Csf1	Csf1	chr3:107741047-107760469	Young	Old	OK	8.4829	11.0924	0.386947	1.83433	0.0014	0.0687418
Rida	Rida	chr15:34484021-34495246	Young	Old	OK	30.8508	40.4444	0.390629	1.7784	0.00205	0.0888486
Vstm4	Vstm4	chr14:32856755-32939489	Young	Old	OK	1.80657	2.37074	0.392082	1.18596	0.04065	0.634533
Il4ra	Il4ra	chr7:125552281-125579474	Young	Old	OK	1.19274	1.56523	0.392093	1.26924	0.02505	0.476318
Hk2	Hk2	chr6:82725026-82774454	Young	Old	OK	1.52991	2.00782	0.392188	1.41334	0.01405	0.330303
Plin2	Plin2	chr4:86656564-86670059	Young	Old	OK	2.78413	3.65398	0.392242	1.20392	0.0362	0.58938
Esyt1	Esyt1	chr10:128510249-128525859	Young	Old	OK	3.01404	3.95634	0.392469	1.50944	0.00925	0.249172
Csf2ra	Csf2ra	chr19:61224401-61228418	Young	Old	OK	4.99929	6.56412	0.39288	1.41707	0.01545	0.355144
Shc1	Shc1	chr3:89418550-89430029	Young	Old	OK	1.62633	2.13583	0.393177	1.23449	0.03225	0.551699
Tor3a	Tor3a	chr1:156653616-156674339	Young	Old	OK	2.71488	3.56797	0.394217	1.40049	0.01485	0.343899
Inpp5d	Inpp5d	chr1:87620311-87720510	Young	Old	OK	3.22608	4.23996	0.394268	1.62658	0.0039	0.140727
Dap	Dap	chr15:31224384-31274338	Young	Old	OK	4.6362	6.09591	0.394901	1.30305	0.02155	0.434811
Snx9	Snx9	chr17:5841379-5930711	Young	Old	OK	4.67361	6.14514	0.394907	1.44825	0.0124	0.30491
Sirt4	Sirt4	chr5:115478009-115484484	Young	Old	OK	4.37032	5.74662	0.394975	1.30352	0.02155	0.434811
Cd53	Cd53	chr3:106758860-106790149	Young	Old	OK	3.02032	3.97215	0.395222	1.41358	0.0138	0.326902
Cd302	Cd302	chr2:60251992-60284484	Young	Old	OK	6.9419	9.13022	0.395319	1.41317	0.0139	0.32777
Fah	Fah	chr7:84585158-84605942	Young	Old	OK	10.5676	13.9047	0.395924	1.63674	0.00515	0.170378
Cav1	Cav1	chr6:17306334-17341328	Young	Old	OK	6.83196	9.00481	0.398396	1.68243	0.0039	0.140727
Thbd	Thbd	chr2:148404470-148408188	Young	Old	OK	5.72529	7.55575	0.400228	1.74886	0.00205	0.0888486
Itgb5	Itgb5	chr16:33829664-33949338	Young	Old	OK	19.6703	25.9598	0.400264	1.99708	0.0004	0.0282109
Galnt6	Galnt6	chr15:100689914-100729376	Young	Old	OK	4.43467	5.85508	0.400864	1.78787	0.00205	0.0888486
Tmem176b	Tmem176b	chr6:48833810-48841374	Young	Old	OK	31.3231	41.3764	0.401584	1.84051	0.0011	0.0592625
Stom	Stom	chr2:35313989-35337009	Young	Old	OK	6.15845	8.13565	0.401691	1.69466	0.0037	0.136364
Plekho2	Plekho2	chr9:65550572-65580087	Young	Old	OK	2.96417	3.91872	0.402757	1.63648	0.00465	0.158222
Tapbp	Tapbp	chr17:33916175-33929290	Young	Old	OK	11.0064	14.5515	0.402824	1.33796	0.0206	0.421675
D7Ertd443e	D7Ertd443e	chr7:134266261-134376828	Young	Old	OK	1.67155	2.21138	0.403756	1.15548	0.04575	0.686515
Tm4sf1	Tm4sf1	chr3:57287063-57301919	Young	Old	OK	6.77348	8.96618	0.404597	1.56086	0.0074	0.216638
Ppl	Ppl	chr16:5086290-5132481	Young	Old	OK	0.62719	0.830976	0.405903	1.13113	0.04705	0.693284
Tmem173	Tmem173	chr18:35733677-35740554	Young	Old	OK	1.95191	2.58623	0.405966	1.17939	0.03985	0.62519
F11r	F11r	chr1:171437560-171464593	Young	Old	OK	3.77629	5.0039	0.406084	1.4848	0.0103	0.266803
Ifi27	Ifi27	chr12:103433872-103443680	Young	Old	OK	39.6835	52.624	0.407182	1.66504	0.0047	0.159574
Aox1	Aox1	chr1:58029968-58106410	Young	Old	OK	1.25054	1.65863	0.407433	1.29207	0.026	0.486156
Itgam	Itgam	chr7:128062639-128128160	Young	Old	OK	6.87072	9.11589	0.407922	1.89941	0.00095	0.0528323
Thbs2	Thbs2	chr17:14665499-14694262	Young	Old	OK	1.07758	1.431	0.409224	1.3659	0.01645	0.370447
Arhgap29	Arhgap29	chr3:121953325-122016153	Young	Old	OK	5.19722	6.9038	0.409651	1.53903	0.00705	0.210361
Ddo	Ddo	chr10:40630010-40681847	Young	Old	OK	3.77709	5.0225	0.411132	1.36949	0.0176	0.381932
Myoc	Myoc	chr1:162639149-162658219	Young	Old	OK	13.6141	18.1177	0.412295	1.86326	0.00115	0.0600788
Col11a2	Col11a2	chr17:34039137-34066684	Young	Old	OK	2.48788	3.31203	0.4128	1.65959	0.00385	0.139898
Lgals1	Lgals1	chr15:78926724-78930465	Young	Old	OK	19.0416	25.3875	0.414965	1.63345	0.00485	0.163593
Slc14a1	Slc14a1	chr18:78100090-78142119	Young	Old	OK	7.21529	9.6314	0.416688	1.90492	0.00115	0.0600788
Kif13b	Kif13b	chr14:64652530-64806296	Young	Old	OK	7.60873	10.1595	0.417098	1.66247	0.00415	0.147012
Magt1	Magt1	chrX:105968084-106011899	Young	Old	OK	5.77638	7.71474	0.417453	1.22009	0.03395	0.567027
Slc16a11	Slc16a11	chr11:70213909-70216414	Young	Old	OK	3.53294	4.72083	0.418171	1.36499	0.0174	0.380251
Arap3	Arap3	chr18:37972622-37998969	Young	Old	OK	2.81549	3.76244	0.418283	1.24344	0.03075	0.539382
Rcsd1	Rcsd1	chr1:165648944-165709732	Young	Old	OK	2.09464	2.79945	0.418442	1.31785	0.0232	0.458562
Serpinf1	Serpinf1	chr11:75410028-75422623	Young	Old	OK	8.68404	11.6492	0.423794	1.66077	0.00375	0.137553
Ptrf	Ptrf	chr11:100956735-100970617	Young	Old	OK	8.1575	10.9491	0.424619	1.93797	0.001	0.0550213
Tgfbr2	Tgfbr2	chr9:116087694-116175363	Young	Old	OK	5.55371	7.45988	0.425701	1.94406	0.0009	0.050965
Ahnak	Ahnak	chr19:8989283-9076926	Young	Old	OK	2.57751	3.46373	0.426349	1.30181	0.00585	0.186383
Rbp1	Rbp1	chr9:98422960-98446550	Young	Old	OK	4.44089	5.97405	0.427862	1.6548	0.00485	0.163593
Mvp	Mvp	chr7:126986859-127014594	Young	Old	OK	3.59363	4.83892	0.429244	1.59677	0.0061	0.191983
Ntn4	Ntn4	chr10:93641048-93745972	Young	Old	OK	2.29497	3.09237	0.430236	1.36071	0.0179	0.386282
Ubxn11	Ubxn11	chr4:134102582-134126780	Young	Old	OK	2.56891	3.46405	0.431306	1.21233	0.036	0.587356
S100b	S100b	chr10:76253835-76261319	Young	Old	OK	74.3542	100.297	0.431798	2.17069	5e-05	0.00513775
Sox13	Sox13	chr1:133382299-133424212	Young	Old	OK	2.02689	2.73621	0.432912	1.41711	0.0133	0.318953
C030029H02Rik	C030029H02Rik	chr7:136268323-136318511	Young	Old	OK	1.58336	2.13847	0.433586	1.22399	0.0317	0.546508
Thrsp	Thrsp	chr7:97412932-97417550	Young	Old	OK	38.1295	51.5198	0.434216	1.62007	0.005	0.167922
Prr5l	Prr5l	chr2:101714284-101838980	Young	Old	OK	3.46951	4.68798	0.434237	1.75275	0.00315	0.120979
Pcolce	Pcolce	chr5:137605106-137611404	Young	Old	OK	7.49801	10.1346	0.434706	1.61528	0.0053	0.174596
Slc46a3	Slc46a3	chr5:147878440-147894815	Young	Old	OK	2.60969	3.52803	0.434982	1.40283	0.01625	0.368618
Cast	Cast	chr13:74693293-74808760	Young	Old	OK	1.85958	2.51433	0.435198	1.42161	0.0131	0.316111
Helz2	Helz2	chr2:181227614-181242027	Young	Old	OK	0.588221	0.795377	0.43528	1.37176	0.0136	0.323647
Ppp1r14a	Ppp1r14a	chr7:29289319-29293390	Young	Old	OK	25.566	34.5815	0.435775	1.57752	0.00735	0.21599
Adap2	Adap2	chr11:80154161-80178924	Young	Old	OK	1.98673	2.68747	0.435849	1.26709	0.02835	0.512082
Clic1	Clic1	chr17:35050242-35058719	Young	Old	OK	8.62092	11.6624	0.435946	1.58825	0.00665	0.203514
Evc	Evc	chr5:37299170-37336881	Young	Old	OK	2.43262	3.29182	0.436373	1.34281	0.02155	0.434811
Tatdn3	Tatdn3	chr1:191045829-191062932	Young	Old	OK	4.54425	6.15026	0.436604	1.18445	0.03655	0.591355
Lyn	Lyn	chr4:3678120-3791612	Young	Old	OK	2.54982	3.45131	0.436749	1.58836	0.00595	0.188025
Sdpr	Sdpr	chr1:51218385-51333779	Young	Old	OK	3.99131	5.40589	0.437671	1.7165	0.00255	0.104121
Dmpk	Dmpk	chr7:19083848-19093820	Young	Old	OK	2.93217	3.9715	0.437715	1.48079	0.01045	0.268893
Rps6kb2	Rps6kb2	chr19:4156976-4163245	Young	Old	OK	5.39705	7.31293	0.438279	1.51082	0.0079	0.225739
Anln	Anln	chr9:22331213-22389206	Young	Old	OK	11.7545	15.9389	0.439345	2.15291	0.0001	0.00918107
Crlf2	Crlf2	chr5:109554708-109558993	Young	Old	OK	7.44166	10.098	0.44038	1.61802	0.0045	0.154816
Pdgfd	Pdgfd	chr9:6168611-6377519	Young	Old	OK	2.16863	2.94416	0.441075	1.20463	0.0357	0.584305
Cd9	Cd9	chr6:125460265-125499668	Young	Old	OK	43.6958	59.3548	0.441869	2.14597	0.00015	0.0126489
Steap3	Steap3	chr1:120226415-120271082	Young	Old	OK	2.78399	3.78581	0.443451	1.55359	0.0066	0.202783
Hspa12b	Hspa12b	chr2:131127411-131145983	Young	Old	OK	2.25521	3.06683	0.443487	1.49113	0.0115	0.290609
Tmem176a	Tmem176a	chr6:48841482-48845858	Young	Old	OK	12.4646	16.953	0.443709	1.79074	0.002	0.0881591
Arhgdib	Arhgdib	chr6:136923660-136941899	Young	Old	OK	7.83965	10.6628	0.443723	1.56658	0.0066	0.202783
A230001M10Rik	A230001M10Rik	chr3:102262404-102445132	Young	Old	OK	1.95476	2.6597	0.444271	1.20497	0.03585	0.586142
Cebpd	Cebpd	chr16:15887285-16146851	Young	Old	OK	4.71853	6.4202	0.444281	1.50656	0.00975	0.2586
Bin2	Bin2	chr15:100641081-100669500	Young	Old	OK	2.38998	3.25292	0.444735	1.32365	0.02055	0.421675
Emilin1	Emilin1	chr5:30913785-30921273	Young	Old	OK	0.91606	1.24851	0.446693	1.18461	0.03685	0.59435
Scn7a	Scn7a	chr2:66673425-66784910	Young	Old	OK	0.79485	1.08495	0.448868	1.41839	0.01225	0.303144
Enpp6	Enpp6	chr8:46986924-47094895	Young	Old	OK	2.69029	3.67252	0.44901	1.26628	0.02795	0.506035
Ermn	Ermn	chr2:58045114-58052752	Young	Old	OK	24.193	33.0485	0.449995	2.24212	0.00015	0.0126489
Adcy7	Adcy7	chr8:88272402-88329962	Young	Old	OK	0.822715	1.12423	0.450474	1.30771	0.02125	0.431564
Kcne1l	Kcne1l	chrX:142304752-142306198	Young	Old	OK	2.87063	3.92418	0.451022	1.27365	0.0294	0.526148
Dmp1	Dmp1	chr5:104202616-104214102	Young	Old	OK	2.6722	3.65438	0.451603	1.55632	0.0064	0.198605
Mr1	Mr1	chr1:155127877-155146780	Young	Old	OK	2.61266	3.57327	0.451721	1.47903	0.01055	0.271016
Hmox1	Hmox1	chr8:75093617-75100593	Young	Old	OK	3.92076	5.36431	0.452257	1.45238	0.0121	0.30039
Foxc1	Foxc1	chr13:31806645-31810635	Young	Old	OK	1.4997	2.05388	0.453678	1.48233	0.01145	0.289818
Nipal4	Nipal4	chr11:46148154-46166359	Young	Old	OK	1.51263	2.07236	0.454216	1.3952	0.01665	0.371714
Stab1	Stab1	chr14:31134852-31168641	Young	Old	OK	3.05744	4.19027	0.454719	1.52999	0.00695	0.209391
Dcdc2a	Dcdc2a	chr13:25056003-25210706	Young	Old	OK	1.76124	2.41447	0.455119	1.80342	0.0017	0.0780391
P2rx4	P2rx4	chr5:122707543-122729738	Young	Old	OK	4.33571	5.9442	0.455213	1.29478	0.02425	0.469742
Vegfa	Vegfa	chr17:46016992-46032377	Young	Old	OK	22.5547	30.9484	0.456433	1.19942	0.0363	0.58977
Pir	Pir	chrX:164269430-164373013	Young	Old	OK	2.54964	3.50245	0.45807	1.29643	0.025	0.476318
Cx3cr1	Cx3cr1	chr9:120048682-120068296	Young	Old	OK	18.0845	24.846	0.458258	1.9112	0.0008	0.0473771
Nt5e	Nt5e	chr9:88327608-88372089	Young	Old	OK	0.951907	1.30827	0.458773	1.25347	0.02895	0.519293
Nos3	Nos3	chr5:24364818-24392143	Young	Old	OK	2.59218	3.56383	0.459265	1.58609	0.00615	0.192386
Cpq	Cpq	chr15:33083128-33653436	Young	Old	OK	7.27262	9.99957	0.459392	1.84523	0.0011	0.0592625
Col1a2	Col1a2	chr6:4505617-4541543	Young	Old	OK	3.02022	4.15368	0.459739	1.87215	0.00095	0.0528323
Tagln2	Tagln2	chr1:172500245-172507380	Young	Old	OK	7.46576	10.2718	0.460333	1.62755	0.0038	0.138406
Edn3	Edn3	chr2:174760618-174784042	Young	Old	OK	1.86173	2.56707	0.46348	1.49947	0.00975	0.2586
Scarf2	Scarf2	chr16:17797281-17808293	Young	Old	OK	0.924524	1.27656	0.465476	1.16119	0.04475	0.674773
Lpcat2	Lpcat2	chr8:92855349-92919279	Young	Old	OK	4.11339	5.68577	0.467028	1.73729	0.0033	0.125805
Tfpi	Tfpi	chr2:84432859-84476775	Young	Old	OK	1.43546	1.98576	0.468173	1.14615	0.0488	0.708308
Gm11681	Gm11681	chr11:112792730-112799008	Young	Old	OK	3.69396	5.11127	0.468516	1.14839	0.04575	0.686515
Rpp38	Rpp38	chr2:3328948-3332628	Young	Old	OK	4.98985	6.91176	0.470058	1.30528	0.0225	0.449884
Arpc1b	Arpc1b	chr5:145114255-145128186	Young	Old	OK	6.72462	9.31831	0.470616	1.75152	0.00255	0.104121
Fhod1	Fhod1	chr8:105329159-105347970	Young	Old	OK	0.851742	1.18081	0.471284	1.28764	0.02755	0.502901
Mobp	Mobp	chr9:120149741-120181484	Young	Old	OK	413.508	574.088	0.473354	1.93796	0.00025	0.0192985
Havcr2	Havcr2	chr11:46454930-46481254	Young	Old	OK	1.13701	1.57896	0.473733	1.24642	0.03245	0.552683
Reck	Reck	chr4:43875529-43944806	Young	Old	OK	2.20976	3.07373	0.476103	1.80681	0.0017	0.0780391
Nfe2l2	Nfe2l2	chr2:75675512-75704663	Young	Old	OK	8.60096	11.9699	0.476835	2.10516	5e-05	0.00513775
Asap3	Asap3	chr4:136206364-136246573	Young	Old	OK	0.831951	1.1579	0.476935	1.39563	0.01635	0.368731
Tppp3	Tppp3	chr8:105467491-105471422	Young	Old	OK	32.8136	45.6837	0.477383	2.18947	0.0003	0.0221657
Cyth4	Cyth4	chr15:78597046-78622019	Young	Old	OK	6.80894	9.47988	0.477439	1.89026	0.00125	0.0635902
Alox5ap	Alox5ap	chr5:149265003-149288153	Young	Old	OK	3.86525	5.3836	0.47801	1.22247	0.0355	0.581645
Hhatl	Hhatl	chr9:121784015-121792507	Young	Old	OK	4.72546	6.58648	0.479053	1.70435	0.00335	0.126777
Ftx	Ftx	chrX:103560909-103623754	Young	Old	OK	2.68992	3.74949	0.479129	1.84488	0.00095	0.0528323
Tor4a	Tor4a	chr2:25192719-25196813	Young	Old	OK	1.41677	1.97646	0.480305	1.29619	0.02495	0.476318
Xist	Xist	chrX:103431516-103484957	Young	Old	OK	23.6585	33.0217	0.481054	2.19261	0.00025	0.0192985
Vtn	Vtn	chr11:78499119-78502325	Young	Old	OK	44.7222	62.4524	0.481764	2.40069	5e-05	0.00513775
Acta2	Acta2	chr19:34240335-34255373	Young	Old	OK	6.62605	9.27462	0.485139	1.97357	0.00035	0.0252586
Igf2	Igf2	chr7:142650767-142670356	Young	Old	OK	30.6841	42.9794	0.486154	2.1421	0.0002	0.0159138
Cyp2j12	Cyp2j12	chr4:96099317-96141152	Young	Old	OK	1.84998	2.59482	0.488124	1.2983	0.02595	0.486156
Fbln1	Fbln1	chr15:85206007-85286294	Young	Old	OK	6.05428	8.49429	0.488538	1.96653	0.0009	0.050965
Cpxm2	Cpxm2	chr7:132042809-132155301	Young	Old	OK	1.15583	1.62364	0.490309	1.37989	0.0176	0.381932
Dcxr	Dcxr	chr11:120724545-120727281	Young	Old	OK	4.70495	6.61312	0.491151	1.34547	0.01875	0.397982
Slc26a10	Slc26a10	chr10:127172425-127180645	Young	Old	OK	1.30461	1.83535	0.492431	1.27962	0.02575	0.484287
Car8	Car8	chr4:8141492-8239041	Young	Old	OK	1.18903	1.67338	0.492989	1.66278	0.0043	0.14993
Robo3	Robo3	chr9:37416044-37433175	Young	Old	OK	1.42408	2.00536	0.493831	1.65282	0.0045	0.154816
Ptges	Ptges	chr2:30889470-30903297	Young	Old	OK	0.789641	1.11205	0.493952	1.28659	0.02755	0.502901
Slc39a8	Slc39a8	chr3:135825278-135888572	Young	Old	OK	1.16672	1.64379	0.494566	1.42746	0.0132	0.31803
Mgst1	Mgst1	chr6:138140536-138156752	Young	Old	OK	9.5874	13.5215	0.496045	1.73867	0.0029	0.114495
Fgd2	Fgd2	chr17:29360913-29379535	Young	Old	OK	1.67888	2.36827	0.496331	1.37881	0.018	0.3879
Fam129a	Fam129a	chr1:151571372-151719347	Young	Old	OK	0.735239	1.03748	0.496797	1.21462	0.03105	0.540709
Col5a2	Col5a2	chr1:45374330-45503282	Young	Old	OK	0.436436	0.615913	0.496957	1.23252	0.03235	0.552683
Fcgr3	Fcgr3	chr1:171051168-171059403	Young	Old	OK	9.65593	13.6355	0.497885	1.9546	0.00075	0.0456353
Sncg	Sncg	chr14:34370273-34374669	Young	Old	OK	4.47493	6.32253	0.498636	1.24051	0.03285	0.55827
Serpinb1a	Serpinb1a	chr13:32842091-32851185	Young	Old	OK	4.03025	5.69961	0.499994	1.72458	0.00365	0.134841
Ccr5	Ccr5	chr9:124121542-124132399	Young	Old	OK	2.05001	2.89949	0.50017	1.32878	0.0184	0.393243
Ctsc	Ctsc	chr7:88278084-88315861	Young	Old	OK	2.50975	3.5527	0.501371	1.92546	0.00115	0.0600788
Tap2	Tap2	chr17:34204478-34216321	Young	Old	OK	5.10876	7.24336	0.503687	2.00518	0.00055	0.036314
Tcirg1	Tcirg1	chr19:3896049-3907133	Young	Old	OK	3.89268	5.53449	0.507686	1.92265	0.00115	0.0600788
Dnase2a	Dnase2a	chr8:84908623-84911461	Young	Old	OK	2.2062	3.13854	0.508528	1.39386	0.0172	0.37801
Slc37a2	Slc37a2	chr9:37229148-37255738	Young	Old	OK	0.939406	1.33696	0.509137	1.48563	0.01035	0.267206
Rcn3	Rcn3	chr7:45082913-45092213	Young	Old	OK	5.71718	8.14043	0.5098	1.77861	0.002	0.0881591
Ifit2	Ifit2	chr19:34550693-34576534	Young	Old	OK	2.63049	3.74766	0.510656	1.96134	0.0008	0.0473771
Pros1	Pros1	chr16:62854306-62929342	Young	Old	OK	5.35109	7.62525	0.510954	2.18106	0.00025	0.0192985
Kazald1	Kazald1	chr19:45075240-45079289	Young	Old	OK	1.48674	2.11989	0.511842	1.16033	0.04435	0.670043
Casp8	Casp8	chr1:58795373-58847503	Young	Old	OK	0.878632	1.25449	0.513772	1.24773	0.031	0.540709
Tnfrsf1a	Tnfrsf1a	chr6:125349722-125362483	Young	Old	OK	5.7822	8.25575	0.51378	2.03305	0.00045	0.0308947
Apbb1ip	Apbb1ip	chr2:22774326-22875653	Young	Old	OK	2.87791	4.11319	0.515233	1.51285	0.0089	0.245716
Naalad2	Naalad2	chr9:18323020-18397538	Young	Old	OK	0.745869	1.0677	0.517506	1.19695	0.03685	0.59435
Rhoj	Rhoj	chr12:75308312-75401455	Young	Old	OK	2.14483	3.07176	0.518204	1.60443	0.0055	0.177787
Itpr3	Itpr3	chr17:27057303-27122223	Young	Old	OK	0.588138	0.842746	0.518943	1.66181	0.00425	0.14852
Hpgds	Hpgds	chr6:65117292-65144730	Young	Old	OK	1.583	2.27118	0.520776	1.64277	0.00465	0.158222
Pik3r5	Pik3r5	chr11:68432124-68497846	Young	Old	OK	0.633326	0.908746	0.520929	1.17927	0.026	0.486156
Pou2f2	Pou2f2	chr7:25091114-25132460	Young	Old	OK	1.03613	1.48696	0.521162	1.39235	0.0154	0.35452
Osr1	Osr1	chr12:9574441-9581500	Young	Old	OK	1.10954	1.59307	0.521846	1.2412	0.03245	0.552683
Cercam	Cercam	chr2:29869493-29882840	Young	Old	OK	1.58315	2.27309	0.521854	1.52874	0.0092	0.249123
Msn	Msn	chrX:96096044-96168553	Young	Old	OK	11.5913	16.6559	0.522991	2.5327	5e-05	0.00513775
Nckap1l	Nckap1l	chr15:103453824-103498800	Young	Old	OK	3.0856	4.43573	0.523622	2.15846	0.00015	0.0126489
Col27a1	Col27a1	chr4:63215411-63334990	Young	Old	OK	0.586263	0.843008	0.523998	1.1133	0.0443	0.66994
Pawr	Pawr	chr10:108332188-108414391	Young	Old	OK	1.21631	1.74994	0.524795	1.23925	0.03205	0.548883
Gpsm3	Gpsm3	chr17:34589805-34591754	Young	Old	OK	1.56637	2.25442	0.525331	1.19557	0.0383	0.611381
Unc93b1	Unc93b1	chr19:3935185-3949340	Young	Old	OK	8.30518	11.9731	0.527708	1.87347	0.0012	0.062064
Xdh	Xdh	chr17:73883894-73950196	Young	Old	OK	2.14353	3.09451	0.529726	1.37477	0.01865	0.396402
Eya4	Eya4	chr10:23104167-23350786	Young	Old	OK	1.02275	1.47703	0.53024	1.56778	0.0076	0.220003
Ncf2	Ncf2	chr1:152800152-152836990	Young	Old	OK	0.589337	0.851283	0.530546	1.24843	0.02865	0.5157
Eya2	Eya2	chr2:165595027-165771727	Young	Old	OK	0.964911	1.39381	0.530562	1.21739	0.03525	0.579385
Il33	Il33	chr19:29925113-29960715	Young	Old	OK	30.8519	44.5858	0.531224	2.61358	5e-05	0.00513775
Tnfrsf1b	Tnfrsf1b	chr4:145212367-145246871	Young	Old	OK	1.32049	1.90996	0.53247	1.7968	0.0017	0.0780391
Atoh8	Atoh8	chr6:72206176-72235577	Young	Old	OK	0.977996	1.4147	0.532597	1.30316	0.02385	0.466066
Smpdl3b	Smpdl3b	chr4:132732965-132757171	Young	Old	OK	0.893907	1.29323	0.532782	1.16401	0.0462	0.687945
Col6a2	Col6a2	chr10:76595755-76623404	Young	Old	OK	1.58813	2.29997	0.534284	1.75399	0.00225	0.0948668
Ctsz	Ctsz	chr2:174415803-174439039	Young	Old	OK	30.4574	44.1149	0.534473	1.67047	0.00635	0.197845
Mxra8	Mxra8	chr4:155839679-155844102	Young	Old	OK	2.70794	3.92297	0.534749	1.45692	0.01175	0.295483
Smtn	Smtn	chr11:3517521-3539292	Young	Old	OK	2.04024	2.95649	0.535152	1.74549	0.0025	0.103717
Hfe	Hfe	chr13:23703840-23710811	Young	Old	OK	2.86956	4.15963	0.535624	1.63157	0.00445	0.154121
Pmp22	Pmp22	chr11:63128981-63159547	Young	Old	OK	13.9525	20.2281	0.535833	2.37051	0.0001	0.00918107
Firre	Firre	chrX:50537388-50635321	Young	Old	OK	9.79461	14.2075	0.536593	1.19499	0.03325	0.56016
Vwa1	Vwa1	chr4:155768494-155776161	Young	Old	OK	8.33102	12.0858	0.536754	2.37283	0.0001	0.00918107
Slfn5	Slfn5	chr11:82911252-82964850	Young	Old	OK	1.76139	2.55689	0.537681	1.72971	0.00345	0.128678
Irf1	Irf1	chr11:53770013-53778374	Young	Old	OK	3.22773	4.68936	0.538874	1.8165	0.00195	0.0871937
Fam183b	Fam183b	chr11:58792801-58801960	Young	Old	OK	5.98073	8.6946	0.539799	1.27798	0.0255	0.481694
Catip	Catip	chr1:74362107-74369321	Young	Old	OK	0.736242	1.07212	0.54222	1.13474	0.04945	0.710492
Lcp1	Lcp1	chr14:75131122-75230842	Young	Old	OK	3.22039	4.68965	0.542245	2.11366	0.00035	0.0252586
Irf9	Irf9	chr14:55603984-55610030	Young	Old	OK	4.01467	5.84997	0.543147	2.02204	0.0008	0.0473771
Zic1	Zic1	chr9:91360344-91365799	Young	Old	OK	3.17088	4.62796	0.545491	2.02126	0.00055	0.036314
Dock8	Dock8	chr19:24999528-25202432	Young	Old	OK	0.856514	1.25075	0.546244	1.75971	0.00195	0.0871937
Fxyd5	Fxyd5	chr7:31032722-31042331	Young	Old	OK	6.86653	10.0342	0.54727	1.79344	0.0018	0.0821435
Fermt3	Fermt3	chr19:6996130-7019469	Young	Old	OK	1.65126	2.41396	0.547836	1.24123	0.0332	0.56016
Bcas1	Bcas1	chr2:170346990-170427845	Young	Old	OK	71.4615	104.508	0.548377	2.65838	5e-05	0.00513775
Lipo1	Lipo1	chr19:33555280-33590311	Young	Old	OK	1.66795	2.44347	0.550859	1.33433	0.01975	0.412437
Fes	Fes	chr7:80377757-80387946	Young	Old	OK	1.05568	1.54673	0.551039	1.44633	0.01225	0.303144
Vps33b	Vps33b	chr7:80269654-80291579	Young	Old	OK	5.10415	7.48707	0.55273	1.17604	0.0495	0.710492
Gjb1	Gjb1	chrX:101376375-101385629	Young	Old	OK	11.1984	16.4475	0.554574	2.05	0.0006	0.0383111
Stat5a	Stat5a	chr11:100859350-100885169	Young	Old	OK	0.432562	0.636418	0.557068	1.19655	0.03325	0.56016
Gstt3	Gstt3	chr10:75774121-75781414	Young	Old	OK	1.73357	2.55912	0.561906	1.50297	0.0101	0.263381
Clec14a	Clec14a	chr12:58264719-58269258	Young	Old	OK	0.876342	1.2941	0.562382	1.63231	0.0054	0.176022
Card10	Card10	chr15:78775135-78803042	Young	Old	OK	1.52327	2.25011	0.562826	1.95258	0.00115	0.0600788
Rassf4	Rassf4	chr6:116633007-116673836	Young	Old	OK	1.97944	2.9269	0.564278	1.78884	0.0017	0.0780391
Slc13a4	Slc13a4	chr6:35267952-35308126	Young	Old	OK	5.36439	7.94531	0.566689	2.34353	5e-05	0.00513775
Lair1	Lair1	chr7:4007072-4063204	Young	Old	OK	1.89694	2.8145	0.569201	1.90711	0.00075	0.0456353
Itga5	Itga5	chr15:103344285-103366791	Young	Old	OK	0.602137	0.89402	0.570214	1.45532	0.0119	0.29685
Adgrg6	Adgrg6	chr10:14402584-14545036	Young	Old	OK	0.307404	0.456632	0.570895	1.34684	0.0201	0.415829
Slc52a3	Slc52a3	chr2:151996510-152009258	Young	Old	OK	0.929761	1.38115	0.570941	1.3917	0.01635	0.368731
AF251705	AF251705	chr11:114996768-115001880	Young	Old	OK	2.73973	4.07317	0.572121	1.47642	0.01135	0.287756
Aldh1l2	Aldh1l2	chr10:83487446-83534140	Young	Old	OK	1.24862	1.85779	0.573254	2.00127	0.0006	0.0383111
Trim21	Trim21	chr7:102557919-102565482	Young	Old	OK	1.00618	1.49722	0.573397	1.50312	0.01115	0.283148
Srgn	Srgn	chr10:62494427-62507755	Young	Old	OK	6.78752	10.1052	0.574144	1.82662	0.00145	0.0707491
Lgals9	Lgals9	chr11:78962978-78984924	Young	Old	OK	4.70076	6.99961	0.574378	1.94569	0.00105	0.0571642
Cd44	Cd44	chr2:102811141-102901665	Young	Old	OK	1.64732	2.45344	0.574688	1.97677	0.00055	0.036314
Plekhn1	Plekhn1	chr4:156221455-156228542	Young	Old	OK	1.71971	2.5666	0.577692	1.33162	0.01955	0.409363
Tspo	Tspo	chr15:83563572-83574203	Young	Old	OK	5.73788	8.56761	0.578375	1.68023	0.00405	0.144128
Htra3	Htra3	chr5:35652025-35679780	Young	Old	OK	1.82058	2.71941	0.578897	1.79378	0.00225	0.0948668
Klf4	Klf4	chr4:55527136-55532475	Young	Old	OK	1.8869	2.81893	0.579128	1.87972	0.0014	0.0687418
Bicc1	Bicc1	chr10:70925095-71159634	Young	Old	OK	1.4373	2.15325	0.583156	1.7512	0.00265	0.107077
Parp12	Parp12	chr6:39086411-39118349	Young	Old	OK	2.90356	4.35222	0.583929	2.18953	0.0001	0.00918107
Ctla2a	Ctla2a	chr13:60934154-60936625	Young	Old	OK	1.95438	2.93335	0.585837	1.44582	0.0123	0.303413
Ifih1	Ifih1	chr2:62595792-62646255	Young	Old	OK	1.05373	1.58191	0.586157	1.88915	0.00155	0.0742278
Ube2l6	Ube2l6	chr2:84798827-84810003	Young	Old	OK	2.67719	4.02395	0.587894	1.61857	0.00585	0.186383
Fcer1g	Fcer1g	chr1:171229571-171234349	Young	Old	OK	17.6831	26.5798	0.587958	2.13264	0.0004	0.0282109
Anxa4	Anxa4	chr6:86736839-86793584	Young	Old	OK	2.61479	3.93063	0.588063	1.82105	0.0014	0.0687418
Pctp	Pctp	chr11:89982543-90002894	Young	Old	OK	0.601614	0.905641	0.5901	1.30634	0.0254	0.481204
Ranbp3l	Ranbp3l	chr15:8967948-9067333	Young	Old	OK	1.56121	2.35206	0.591265	2.00747	0.00075	0.0456353
Aspa	Aspa	chr11:73304987-73324637	Young	Old	OK	9.75949	14.7148	0.592389	2.37594	0.0001	0.00918107
Col3a1	Col3a1	chr1:45311537-45349706	Young	Old	OK	0.526756	0.794644	0.593174	1.55076	0.00665	0.203514
Ccl9	Ccl9	chr11:83572916-83578636	Young	Old	OK	0.570475	0.861219	0.594215	1.32879	0.02285	0.454369
Pglyrp1	Pglyrp1	chr7:18884689-18890438	Young	Old	OK	8.91025	13.4528	0.594363	1.80022	0.00255	0.104121
Ecscr	Ecscr	chr18:35713088-35722351	Young	Old	OK	2.08895	3.15816	0.596304	1.17445	0.04005	0.627693
Colec12	Colec12	chr18:9707647-9877995	Young	Old	OK	2.33945	3.54336	0.598949	2.1176	0.00015	0.0126489
Tgfbi	Tgfbi	chr13:56609602-56639339	Young	Old	OK	1.62259	2.45902	0.599784	1.77732	0.00275	0.109408
Lum	Lum	chr10:97565500-97572703	Young	Old	OK	2.16175	3.28559	0.60395	1.80653	0.002	0.0881591
Syne3	Syne3	chr12:104929932-105009809	Young	Old	OK	0.509432	0.77437	0.604134	1.55818	0.00755	0.218964
Exoc3l4	Exoc3l4	chr12:111417429-111431680	Young	Old	OK	0.608328	0.924916	0.604473	1.35154	0.01805	0.3879
Vav1	Vav1	chr17:57279099-57329236	Young	Old	OK	0.985701	1.49887	0.60465	1.73094	0.0022	0.0940364
Bgn	Bgn	chrX:73483600-73495936	Young	Old	OK	9.48562	14.4497	0.607223	2.66234	5e-05	0.00513775
Trf	Trf	chr9:103208875-103230286	Young	Old	OK	230.939	352.271	0.609173	2.68986	5e-05	0.00513775
Pla2g4a	Pla2g4a	chr1:149829618-149961290	Young	Old	OK	1.16231	1.77526	0.611031	1.66738	0.00495	0.166603
Gstt2	Gstt2	chr10:75831844-75834881	Young	Old	OK	0.827132	1.2634	0.61112	1.16232	0.0434	0.661488
Pycard	Pycard	chr7:127991372-127993867	Young	Old	OK	1.03564	1.58224	0.611451	1.46347	0.01185	0.29685
Eps8l1	Eps8l1	chr7:4460714-4480487	Young	Old	OK	1.75685	2.68493	0.611897	1.57749	0.00905	0.247654
Eif2ak2	Eif2ak2	chr17:78852549-78882572	Young	Old	OK	1.39875	2.1389	0.612731	2.04463	0.00055	0.036314
Cdk5rap3	Cdk5rap3	chr11:96907424-96916514	Young	Old	OK	9.39766	14.3719	0.612882	1.19402	0.04975	0.711448
Fam180a	Fam180a	chr6:35312745-35326141	Young	Old	OK	1.05893	1.62094	0.614221	1.28595	0.02585	0.485579
Mmrn2	Mmrn2	chr14:34375503-34404286	Young	Old	OK	1.45118	2.22763	0.618281	2.02906	0.00055	0.036314
Il13ra1	Il13ra1	chrX:36112107-36171261	Young	Old	OK	1.85511	2.85375	0.621357	2.1509	0.0002	0.0159138
Rps10	Rps10	chr17:27630428-27635242	Young	Old	OK	3.328	5.12506	0.62291	1.27284	0.0273	0.500102
Zic4	Zic4	chr9:91368971-91389348	Young	Old	OK	0.704611	1.08614	0.624316	1.42671	0.0129	0.312744
Bmp5	Bmp5	chr9:75775364-75900316	Young	Old	OK	0.36187	0.559834	0.629528	1.32475	0.02215	0.444605
Tal1	Tal1	chr4:115056425-115071755	Young	Old	OK	0.44906	0.694735	0.629556	1.45193	0.0119	0.29685
Il18bp	Il18bp	chr7:102015076-102018690	Young	Old	OK	1.00246	1.55198	0.630568	1.34296	0.0192	0.405868
Irgm2	Irgm2	chr11:58199555-58222783	Young	Old	OK	1.63863	2.538	0.631207	1.68284	0.00305	0.118309
Bdh2	Bdh2	chr3:135281220-135304425	Young	Old	OK	1.1238	1.74233	0.632634	1.24264	0.0301	0.533141
Col6a1	Col6a1	chr10:76708791-76726044	Young	Old	OK	2.98979	4.64758	0.636436	2.5312	5e-05	0.00513775
Reep4	Reep4	chr14:70545250-70548935	Young	Old	OK	0.863793	1.34353	0.63727	1.32838	0.02365	0.463911
AK134520	AK134520	chr6:100807450-100810911	Young	Old	OK	0.350223	0.545191	0.638489	1.28413	0.0271	0.497026
Ly6a	Ly6a	chr15:74994876-74998031	Young	Old	OK	17.8639	27.8239	0.639277	2.65424	5e-05	0.00513775
Ddx58	Ddx58	chr4:40203776-40239825	Young	Old	OK	1.4099	2.20117	0.642681	2.04437	0.0006	0.0383111
Sec14l5	Sec14l5	chr16:5147108-5183934	Young	Old	OK	2.56099	4.00748	0.645996	2.11188	0.0004	0.0282109
Cd33	Cd33	chr7:43527455-43533171	Young	Old	OK	1.70164	2.66962	0.649704	1.93208	0.00135	0.0671365
Ly86	Ly86	chr13:37345344-37419036	Young	Old	OK	12.5366	19.6714	0.649951	2.50262	5e-05	0.00513775
AK021325	AK021325	chr1:191224473-191225686	Young	Old	OK	2.98485	4.68693	0.650985	1.26775	0.0297	0.528469
Uaca	Uaca	chr9:60794547-60880370	Young	Old	OK	2.1849	3.43195	0.651458	2.47993	5e-05	0.00513775
Nr1h3	Nr1h3	chr2:91184060-91195116	Young	Old	OK	1.46228	2.29798	0.652145	1.61294	0.0051	0.169447
Tpm2	Tpm2	chr4:43513725-43523554	Young	Old	OK	1.69405	2.6641	0.653177	1.75797	0.0029	0.114495
Lca5l	Lca5l	chr16:96158405-96192257	Young	Old	OK	0.360873	0.56912	0.657239	1.19987	0.03675	0.593972
Glipr2	Glipr2	chr4:43957701-43979118	Young	Old	OK	1.68233	2.65602	0.6588	1.80764	0.00225	0.0948668
Tfcp2l1	Tfcp2l1	chr1:118627944-118685168	Young	Old	OK	0.874405	1.38096	0.659299	1.76747	0.00045	0.0308947
Plau	Plau	chr14:20836661-20843388	Young	Old	OK	1.2123	1.91554	0.66	1.7145	0.00315	0.120979
Slc13a3	Slc13a3	chr2:165405294-165473197	Young	Old	OK	5.87551	9.29372	0.661541	2.81388	5e-05	0.00513775
Tmprss5	Tmprss5	chr9:49081259-49117587	Young	Old	OK	0.434415	0.687366	0.662006	1.14305	0.04135	0.642872
Sfi1	Sfi1	chr11:3124020-3193463	Young	Old	OK	10.1389	16.0618	0.663735	1.31217	0.0206	0.421675
Irgm1	Irgm1	chr11:48865248-48871346	Young	Old	OK	4.58066	7.26124	0.664661	2.52758	5e-05	0.00513775
Trmt13	Trmt13	chr3:116562972-116630986	Young	Old	OK	1.17659	1.86595	0.665302	1.28809	0.0261	0.486156
Il21r	Il21r	chr7:125603428-125633570	Young	Old	OK	0.793256	1.25808	0.665363	1.54874	0.00745	0.217692
C1qc	C1qc	chr4:136889801-136892914	Young	Old	OK	49.4951	78.5006	0.66542	3.21437	5e-05	0.00513775
Srpk3	Srpk3	chrX:73774404-73778924	Young	Old	OK	0.816396	1.29516	0.665794	1.45061	0.0141	0.330477
Serpinb6b	Serpinb6b	chr13:32965512-32979037	Young	Old	OK	0.542848	0.861294	0.665956	1.25001	0.0308	0.539382
Col9a2	Col9a2	chr4:121039565-121055325	Young	Old	OK	1.16844	1.85536	0.667112	1.80955	0.00255	0.104121
Spaca6	Spaca6	chr17:17827157-17843009	Young	Old	OK	3.2319	5.13294	0.667403	1.32441	0.0211	0.429643
Vamp5	Vamp5	chr6:72368048-72380468	Young	Old	OK	1.13332	1.80099	0.668242	1.50007	0.0103	0.266803
Apobr	Apobr	chr7:126585007-126589092	Young	Old	OK	0.331152	0.52637	0.668584	1.33667	0.0251	0.476685
Col4a6	Col4a6	chrX:141165402-141474076	Young	Old	OK	0.263848	0.419451	0.668794	1.49839	0.00865	0.240958
Plpp2	Plpp2	chr10:79526423-79533787	Young	Old	OK	2.25324	3.58385	0.66951	1.83317	0.00165	0.0771127
Foxd1	Foxd1	chr13:98354244-98356705	Young	Old	OK	0.441974	0.704583	0.672806	1.30167	0.02645	0.490907
Wdfy4	Wdfy4	chr14:32959546-33185066	Young	Old	OK	0.276279	0.441232	0.675411	1.68013	0.00395	0.1422
Tlr4	Tlr4	chr4:66827550-66846581	Young	Old	OK	0.41089	0.65623	0.675448	1.88237	0.00185	0.0839316
Renbp	Renbp	chrX:73922120-73930850	Young	Old	OK	1.76896	2.82778	0.676767	1.58645	0.00695	0.209391
Abca8a	Abca8a	chr11:110025633-110095937	Young	Old	OK	3.42836	5.48947	0.679148	2.94039	5e-05	0.00513775
Clec5a	Clec5a	chr6:40574897-40585805	Young	Old	OK	0.506312	0.810714	0.679165	1.56727	0.007	0.210081
Fcgr1	Fcgr1	chr3:96282908-96293969	Young	Old	OK	1.42645	2.28596	0.68037	1.89735	0.00135	0.0671365
Ctsk	Ctsk	chr3:95499209-95509387	Young	Old	OK	0.836189	1.34023	0.680578	1.38239	0.01995	0.413277
Tbx1	Tbx1	chr16:18581703-18590671	Young	Old	OK	0.435556	0.6985	0.681402	1.16107	0.04145	0.643782
Cd37	Cd37	chr7:45233631-45239115	Young	Old	OK	3.07747	4.93721	0.681954	1.87383	0.00135	0.0671365
Tlr13	Tlr13	chrX:106143274-106160493	Young	Old	OK	0.852744	1.37025	0.684255	1.92052	0.00125	0.0635902
Mlph	Mlph	chr1:90915099-90951142	Young	Old	OK	0.663479	1.06741	0.685997	1.82935	0.00245	0.102464
Cped1	Cped1	chr6:21985909-22255606	Young	Old	OK	0.856708	1.37973	0.687509	2.05325	0.00055	0.036314
AI506816	AI506816	chr5:23692260-23712667	Young	Old	OK	0.441282	0.711084	0.688321	1.4031	0.01485	0.343899
Apobec3	Apobec3	chr15:79889531-79908429	Young	Old	OK	1.14533	1.84591	0.688569	1.58475	0.00555	0.178289
Rtp4	Rtp4	chr16:23609918-23614222	Young	Old	OK	1.50131	2.42065	0.689174	1.67425	0.0046	0.157211
Cfh	Cfh	chr1:140085854-140183411	Young	Old	OK	5.04275	8.13318	0.689609	3.05271	5e-05	0.00513775
Arhgap30	Arhgap30	chr1:171388959-171410298	Young	Old	OK	0.852178	1.3755	0.690724	2.01458	0.00085	0.0490283
Nmi	Nmi	chr2:51948498-51973208	Young	Old	OK	2.03046	3.27812	0.691063	1.71261	0.00305	0.118309
Myo1f	Myo1f	chr17:33555706-33607764	Young	Old	OK	1.00297	1.61959	0.691353	2.01152	0.0009	0.050965
Gna15	Gna15	chr10:81502313-81524225	Young	Old	OK	1.01899	1.64658	0.692336	1.41125	0.01475	0.343635
Mrc2	Mrc2	chr11:105292645-105351145	Young	Old	OK	1.24147	2.00641	0.692561	2.43288	5e-05	0.00513775
Foxc2	Foxc2	chr8:121116170-121118894	Young	Old	OK	0.261269	0.422467	0.693302	1.16947	0.0463	0.688774
Gpr34	Gpr34	chrX:13517080-13858633	Young	Old	OK	7.90057	12.7751	0.693307	1.26046	0.0332	0.56016
H2-M3	H2-M3	chr17:37270233-37274485	Young	Old	OK	1.36011	2.20099	0.694427	1.57524	0.0064	0.198605
Plek	Plek	chr11:16971205-17079372	Young	Old	OK	3.92947	6.37164	0.697328	1.22948	0.0373	0.60036
Naip2	Naip2	chr13:100144062-100202122	Young	Old	OK	0.337189	0.546965	0.697888	1.5357	0.0079	0.225739
Hapln2	Hapln2	chr3:88021749-88027511	Young	Old	OK	8.91258	14.4631	0.69846	2.90076	5e-05	0.00513775
Cyba	Cyba	chr8:122424770-122432940	Young	Old	OK	10.3754	16.8393	0.698654	2.30605	5e-05	0.00513775
Adm	Adm	chr7:110627668-110629819	Young	Old	OK	1.11659	1.81363	0.699781	1.4726	0.01095	0.278982
Stat1	Stat1	chr1:52119437-52161865	Young	Old	OK	7.87758	12.7994	0.700253	2.89765	5e-05	0.00513775
Cp	Cp	chr3:19957053-20035310	Young	Old	OK	4.5704	7.42761	0.700577	2.22614	0.0001	0.00918107
Hck	Hck	chr2:153108467-153151441	Young	Old	OK	0.970608	1.57802	0.701159	1.63854	0.0055	0.177788
Bmp6	Bmp6	chr13:38345715-38528824	Young	Old	OK	4.31982	7.0243	0.701384	1.28521	0.0297	0.528469
Pisd-ps2	Pisd-ps2	chr17:3064317-3084183	Young	Old	OK	9.7149	15.8117	0.70272	2.79949	5e-05	0.00513775
Cd68	Cd68	chr11:69664212-69666170	Young	Old	OK	9.23864	15.0594	0.704916	2.49711	5e-05	0.00513775
Anxa3	Anxa3	chr5:96793384-96845968	Young	Old	OK	8.10282	13.2082	0.704933	2.38552	5e-05	0.00513775
Ier3	Ier3	chr17:35821712-35822911	Young	Old	OK	3.07145	5.01179	0.706407	1.86904	0.001	0.0550213
Rgl3	Rgl3	chr9:21971003-21989453	Young	Old	OK	0.725287	1.18406	0.707123	1.72958	0.00335	0.126777
Plcg2	Plcg2	chr8:117498274-117635142	Young	Old	OK	1.30484	2.13575	0.710876	2.34029	0.00015	0.0126489
Zbtb42	Zbtb42	chr12:112678839-112682747	Young	Old	OK	0.32981	0.540348	0.712252	1.17867	0.03025	0.534577
Smad6	Smad6	chr9:63953075-64022059	Young	Old	OK	0.644612	1.05782	0.714591	1.66913	0.0046	0.157211
Hhex	Hhex	chr19:37434840-37440731	Young	Old	OK	0.819513	1.34571	0.715529	1.50746	0.00985	0.259919
Mpzl3	Mpzl3	chr9:45055180-45075042	Young	Old	OK	0.951398	1.56344	0.716605	1.29706	0.0261	0.486156
Tlr7	Tlr7	chrX:167304925-167330571	Young	Old	OK	1.39237	2.28865	0.716949	2.31772	0.0002	0.0159138
Osmr	Osmr	chr15:6813576-6874313	Young	Old	OK	1.98444	3.2627	0.717331	2.60273	5e-05	0.00513775
AK038603	AK038603	chr11:53564687-53567313	Young	Old	OK	0.577827	0.950073	0.7174	1.27988	0.03035	0.535734
Col18a1	Col18a1	chr10:77052178-77166530	Young	Old	OK	1.32541	2.18006	0.71793	2.33953	0.0001	0.00918107
Slc38a5	Slc38a5	chrX:8271380-8280176	Young	Old	OK	1.19765	1.97054	0.718383	1.71639	0.0034	0.128045
Arhgap4	Arhgap4	chrX:73891841-73911298	Young	Old	OK	0.776648	1.27818	0.718763	1.1276	0.0332	0.56016
Pik3ap1	Pik3ap1	chr19:41274217-41385070	Young	Old	OK	1.16788	1.9234	0.71976	1.94252	0.0008	0.0473771
Cd274	Cd274	chr19:29367437-29388094	Young	Old	OK	0.760228	1.25558	0.723849	1.90464	0.0016	0.0759193
Gbp7	Gbp7	chr3:142496933-142619176	Young	Old	OK	1.0434	1.72381	0.724304	1.73282	0.00265	0.107077
Bmp7	Bmp7	chr2:172868011-172940321	Young	Old	OK	2.35476	3.90536	0.729873	2.67262	5e-05	0.00513775
Bmx	Bmx	chrX:164192841-164258193	Young	Old	OK	0.279416	0.463829	0.731178	1.31099	0.02505	0.476318
Lrrc32	Lrrc32	chr7:98494221-98501830	Young	Old	OK	0.89119	1.47989	0.73168	2.03684	0.0008	0.0473771
Tgfbr3l	Tgfbr3l	chr8:4248213-4251423	Young	Old	OK	0.91703	1.5247	0.733486	1.32323	0.02455	0.47319
Tbx18	Tbx18	chr9:87702799-87731260	Young	Old	OK	0.473587	0.787477	0.733608	1.79175	0.0024	0.100644
Spi1	Spi1	chr2:91096677-91115759	Young	Old	OK	2.42944	4.04535	0.735643	2.02281	0.0011	0.0592625
Ssc5d	Ssc5d	chr7:4925843-4944797	Young	Old	OK	0.333566	0.555976	0.73705	1.58089	0.00925	0.249172
Mboat1	Mboat1	chr13:30136489-30246694	Young	Old	OK	0.8971	1.49676	0.738506	1.89179	0.0014	0.0687418
Serpina3n	Serpina3n	chr12:104406707-104414329	Young	Old	OK	40.552	67.7866	0.741228	3.51808	5e-05	0.00513775
Adamtsl4	Adamtsl4	chr3:95676200-95687917	Young	Old	OK	2.66915	4.46328	0.741725	2.84314	5e-05	0.00513775
P2ry6	P2ry6	chr7:100937633-100964366	Young	Old	OK	1.99461	3.33672	0.742322	1.80135	0.00205	0.0888486
S100a11	S100a11	chr3:93520495-93526288	Young	Old	OK	2.73459	4.57791	0.743365	1.36384	0.02055	0.421675
Ggta1	Ggta1	chr2:35400178-35461449	Young	Old	OK	1.80624	3.02474	0.74382	2.49031	5e-05	0.00513775
Scel	Scel	chr14:103513340-103613346	Young	Old	OK	0.299269	0.501598	0.745091	1.24703	0.0192	0.405868
Islr	Islr	chr9:58156263-58159221	Young	Old	OK	7.05059	11.8216	0.745613	2.97427	5e-05	0.00513775
Rasa4	Rasa4	chr5:136083915-136111861	Young	Old	OK	0.803864	1.34784	0.745626	1.82882	0.00205	0.0888486
B2m	B2m	chr2:122120107-122186189	Young	Old	OK	131.042	220.342	0.74972	3.73465	5e-05	0.00513775
Crispld2	Crispld2	chr8:119992437-120052794	Young	Old	OK	0.877846	1.47766	0.751279	2.15953	0.0001	0.00918107
AK141565	AK141565	chr3:88206812-88211295	Young	Old	OK	0.325813	0.548479	0.751392	1.27845	0.0313	0.542542
Pld4	Pld4	chr12:112760654-112768986	Young	Old	OK	4.87177	8.20682	0.752377	2.81904	5e-05	0.00513775
Tap1	Tap1	chr17:34187555-34197225	Young	Old	OK	1.56879	2.64566	0.753972	2.31018	0.00015	0.0126489
Tnfrsf18	Tnfrsf18	chr4:156026341-156028891	Young	Old	OK	0.856994	1.4477	0.756404	1.28761	0.0228	0.454127
Neurl3	Neurl3	chr1:36264601-36273425	Young	Old	OK	0.595206	1.00553	0.756491	1.36093	0.01945	0.407819
Siglecf	Siglecf	chr7:43351340-43359470	Young	Old	OK	0.273502	0.462559	0.75809	1.19196	0.02555	0.481694
Fbln5	Fbln5	chr12:101746564-101819119	Young	Old	OK	1.43781	2.4319	0.758212	2.09648	0.0002	0.0159138
Pisd-ps1	Pisd-ps1	chr11:3124020-3193463	Young	Old	OK	29.1038	49.3221	0.761024	3.26193	5e-05	0.00513775
C1qa	C1qa	chr4:136895915-136898844	Young	Old	OK	58.5042	99.3372	0.763794	3.70831	5e-05	0.00513775
Runx1	Runx1	chr16:92601465-92826074	Young	Old	OK	0.257788	0.437759	0.763952	1.62092	0.00505	0.16887
Klhl6	Klhl6	chr16:19946491-19983049	Young	Old	OK	0.762812	1.29545	0.764053	1.75147	0.00335	0.126777
Ctss	Ctss	chr3:95526785-95556405	Young	Old	OK	64.0291	108.839	0.7654	3.74925	5e-05	0.00513775
Aox3	Aox3	chr1:58113135-58200452	Young	Old	OK	0.346563	0.589562	0.766526	1.61353	0.00615	0.192386
Ecm1	Ecm1	chr3:95734147-95739569	Young	Old	OK	2.21669	3.77865	0.769463	2.29107	0.0001	0.00918107
C3ar1	C3ar1	chr6:122847139-122856157	Young	Old	OK	1.46185	2.49414	0.770747	1.76557	0.00255	0.104121
S100a6	S100a6	chr3:90612893-90614414	Young	Old	OK	16.6131	28.3772	0.77241	2.86898	5e-05	0.00513775
Themis2	Themis2	chr4:132782356-132796364	Young	Old	OK	0.462336	0.790728	0.774238	1.5556	0.0095	0.254141
Wdsub1	Wdsub1	chr2:59852364-59882606	Young	Old	OK	13.5231	23.1479	0.775451	1.15718	0.0427	0.655325
C5ar1	C5ar1	chr7:16246742-16259540	Young	Old	OK	0.469356	0.803478	0.775576	1.53334	0.00895	0.245784
Rab7b	Rab7b	chr1:131688694-131715439	Young	Old	OK	0.384054	0.6584	0.777654	1.76313	0.00315	0.120979
A4galt	A4galt	chr15:83226721-83251774	Young	Old	OK	1.25097	2.14507	0.77798	1.57156	0.0082	0.231751
Rasal3	Rasal3	chr17:32390660-32404808	Young	Old	OK	0.851872	1.4634	0.780618	2.07908	0.00035	0.0252586
Hcls1	Hcls1	chr16:36934982-36963214	Young	Old	OK	2.66631	4.59098	0.783956	2.50355	5e-05	0.00513775
Gfap	Gfap	chr11:102887335-102897200	Young	Old	OK	253.976	437.335	0.784049	3.2536	5e-05	0.00513775
C1qb	C1qb	chr4:136880144-136886177	Young	Old	OK	57.7291	99.594	0.78676	3.83352	5e-05	0.00513775
Slc1a5	Slc1a5	chr7:16781345-16798274	Young	Old	OK	0.576758	0.996131	0.78837	1.74786	0.00365	0.134841
Mall	Mall	chr2:127704389-127729897	Young	Old	OK	0.426244	0.736624	0.789251	1.39845	0.02035	0.419881
AK089125	AK089125	chr1:93235896-93298927	Young	Old	OK	1.82831	3.16012	0.789469	2.10324	0.0006	0.0383111
Tmem37	Tmem37	chr1:120067376-120073780	Young	Old	OK	1.05719	1.82997	0.791591	1.47731	0.01245	0.305655
Tgm2	Tgm2	chr2:158116404-158146392	Young	Old	OK	5.1345	8.89726	0.793136	3.465	5e-05	0.00513775
Fyb	Fyb	chr15:6579846-6665608	Young	Old	OK	1.50486	2.60996	0.7944	2.58996	5e-05	0.00513775
Hbb-bs	Hbb-bs	chr7:103826522-103827929	Young	Old	OK	44.1506	76.5905	0.794731	3.52777	5e-05	0.00513775
Upk1b	Upk1b	chr16:38773183-38800203	Young	Old	OK	0.753914	1.30791	0.794787	1.61708	0.0073	0.214928
Edn1	Edn1	chr13:42301475-42307990	Young	Old	OK	0.718659	1.24769	0.79588	1.73029	0.00345	0.128678
Mocos	Mocos	chr18:24653690-24701556	Young	Old	OK	0.493132	0.857336	0.797887	1.62732	0.0061	0.191983
Cyp1b1	Cyp1b1	chr17:79706893-79716436	Young	Old	OK	1.31154	2.28108	0.798453	2.73009	5e-05	0.00513775
Hs3st3a1	Hs3st3a1	chr11:64433134-64522835	Young	Old	OK	0.257337	0.447978	0.79977	1.25292	0.0296	0.527901
Tnfsf10	Tnfsf10	chr3:27317076-27342232	Young	Old	OK	0.495374	0.863675	0.80197	1.5575	0.0073	0.214928
Apobec1	Apobec1	chr6:122577791-122602444	Young	Old	OK	0.778073	1.35953	0.805134	1.79619	0.003	0.117545
Xaf1	Xaf1	chr11:72301628-72313733	Young	Old	OK	4.41227	7.70966	0.805145	1.6908	0.0036	0.133951
Slc6a20a	Slc6a20a	chr9:123636906-123783457	Young	Old	OK	4.129	7.21669	0.805543	1.39322	0.0363	0.58977
Trim30a	Trim30a	chr7:104409025-104465193	Young	Old	OK	1.06196	1.85767	0.806768	1.62592	0.00595	0.188025
Ifi203	Ifi203	chr1:173920400-173942672	Young	Old	OK	0.592323	1.03629	0.806967	1.85524	0.0016	0.0759193
Ptgfr	Ptgfr	chr3:151798609-151837528	Young	Old	OK	0.244992	0.429094	0.808557	1.58098	0.00705	0.210361
Ifi30	Ifi30	chr8:70762772-70766663	Young	Old	OK	3.02979	5.30921	0.809283	2.07581	0.00085	0.0490283
Ctsh	Ctsh	chr9:90054266-90076095	Young	Old	OK	6.33913	11.1111	0.809647	3.0957	5e-05	0.00513775
Irak3	Irak3	chr10:120141653-120201537	Young	Old	OK	0.459625	0.805799	0.809963	1.23542	0.03025	0.534577
Mpeg1	Mpeg1	chr19:12460778-12465285	Young	Old	OK	11.2702	19.7808	0.811585	3.56421	5e-05	0.00513775
Zc3hav1	Zc3hav1	chr6:38310496-38354603	Young	Old	OK	1.89623	3.32986	0.812326	2.80464	5e-05	0.00513775
Col6a3	Col6a3	chr1:90766859-90843971	Young	Old	OK	0.295989	0.519777	0.812348	2.11502	0.0003	0.0221657
Txlnb	Txlnb	chr10:17796218-17845663	Young	Old	OK	0.632628	1.11125	0.812757	2.16411	0.00045	0.0308947
Aebp1	Aebp1	chr11:5861865-5878256	Young	Old	OK	6.04091	10.6317	0.815531	2.28648	0.00015	0.0126489
Tmem252	Tmem252	chr19:24674007-24861842	Young	Old	OK	0.928393	1.63488	0.816378	1.22718	0.04575	0.686515
Cdc42ep5	Cdc42ep5	chr7:4151259-4164699	Young	Old	OK	0.628326	1.10675	0.816743	1.18255	0.04355	0.662472
Mlxipl	Mlxipl	chr5:135089889-135138382	Young	Old	OK	0.555383	0.978801	0.817532	1.85744	0.00125	0.0635902
Cxcl16	Cxcl16	chr11:70454233-70466199	Young	Old	OK	1.46273	2.57833	0.817774	1.96531	0.0013	0.0657029
Rac2	Rac2	chr15:78559168-78572783	Young	Old	OK	0.761457	1.3424	0.817985	2.0098	0.0006	0.0383111
Mndal	Mndal	chr1:173747293-173914179	Young	Old	OK	0.722837	1.27921	0.823514	1.57119	0.008	0.226925
Cldn14	Cldn14	chr16:93919030-94008837	Young	Old	OK	0.343736	0.609301	0.825854	1.0449	0.03425	0.569585
Cox8b	Cox8b	chr7:140898941-140900446	Young	Old	OK	6.38466	11.3204	0.826248	1.55379	0.00845	0.237518
Sp100	Sp100	chr1:85649987-85709997	Young	Old	OK	1.02722	1.82644	0.830288	1.96521	0.00075	0.0456353
Cd86	Cd86	chr16:36603868-36666077	Young	Old	OK	0.888711	1.5851	0.834789	2.06622	0.0002	0.0159138
Vim	Vim	chr2:13574310-13582826	Young	Old	OK	39.2129	69.9739	0.835487	4.07152	5e-05	0.00513775
Slc2a4	Slc2a4	chr11:69942285-69948190	Young	Old	OK	0.271005	0.483817	0.836143	1.35192	0.0148	0.343768
Trem2	Trem2	chr17:48346400-48352276	Young	Old	OK	14.0465	25.1183	0.838523	3.33018	5e-05	0.00513775
Gm5086	Gm5086	chr13:97559999-97583994	Young	Old	OK	0.540322	0.968944	0.842595	1.39108	0.01765	0.382482
Tyrobp	Tyrobp	chr7:30413787-30417579	Young	Old	OK	34.4905	61.8602	0.842811	3.38148	5e-05	0.00513775
Clec2d	Clec2d	chr6:129180614-129186535	Young	Old	OK	1.91224	3.43141	0.84354	2.0434	0.0006	0.0383111
Igtp	Igtp	chr11:58199555-58222783	Young	Old	OK	2.07532	3.72438	0.843667	2.01319	0.00075	0.0456353
Nupr1	Nupr1	chr7:126623245-126625470	Young	Old	OK	7.77767	14.0386	0.851986	2.44087	5e-05	0.00513775
Lpin3	Lpin3	chr2:160880669-160906000	Young	Old	OK	0.290558	0.52454	0.852227	1.61933	0.0065	0.200505
Hbb-b2	Hbb-b2	chr7:103812523-103813923	Young	Old	OK	8.5524	15.4694	0.855014	2.51454	5e-05	0.00513775
Clec3b	Clec3b	chr9:123150945-123157432	Young	Old	OK	1.80939	3.27312	0.855164	1.88162	0.00165	0.0771127
Hba-a2	Hba-a2	chr11:32296488-32297310	Young	Old	OK	16.3237	29.5331	0.855368	2.93263	5e-05	0.00513775
Emp1	Emp1	chr6:135362930-135383173	Young	Old	OK	1.07779	1.95	0.855394	2.29483	0.0002	0.0159138
Hrct1	Hrct1	chr4:43727197-43728110	Young	Old	OK	0.780911	1.41525	0.857828	1.41439	0.01695	0.375709
Ccl28	Ccl28	chr13:119623818-119654358	Young	Old	OK	0.910947	1.65374	0.860297	2.44278	0.0001	0.00918107
Ifitm1	Ifitm1	chr7:140967428-140969827	Young	Old	OK	1.43867	2.61641	0.862857	1.50417	0.01095	0.278982
Ncf4	Ncf4	chr15:78244810-78262580	Young	Old	OK	0.517222	0.940834	0.863158	1.33663	0.01935	0.407819
Ly6g6f	Ly6g6f	chr17:35080537-35085595	Young	Old	OK	0.527846	0.961694	0.865462	1.30734	0.0301	0.533141
Apod	Apod	chr16:31296191-31314808	Young	Old	OK	102.037	185.914	0.865534	4.08475	5e-05	0.00513775
Gbp5	Gbp5	chr3:142496933-142619176	Young	Old	OK	1.00939	1.84337	0.868854	1.60299	0.00725	0.214677
Lgals3bp	Lgals3bp	chr11:118392751-118401931	Young	Old	OK	13.1882	24.0893	0.869145	3.96427	5e-05	0.00513775
Sned1	Sned1	chr1:93235896-93298927	Young	Old	OK	0.803771	1.46864	0.86963	1.95254	0.00085	0.0490283
H2-D1	H2-D1	chr17:35241745-35443773	Young	Old	OK	25.6324	46.9258	0.872411	1.69557	0.0042	0.148445
A2m	A2m	chr6:121636172-121679238	Young	Old	OK	3.88439	7.14105	0.878447	3.63734	5e-05	0.00513775
Alas2	Alas2	chrX:150519519-150589844	Young	Old	OK	1.32614	2.4407	0.880064	1.57778	0.0097	0.258156
Parp14	Parp14	chr16:35832877-35871382	Young	Old	OK	0.674021	1.24228	0.882122	2.25241	0.0001	0.00918107
Csf2rb2	Csf2rb2	chr15:78282507-78305721	Young	Old	OK	0.288152	0.532555	0.886103	1.84332	0.0022	0.0940364
I830077J02Rik	I830077J02Rik	chr3:105925890-105932664	Young	Old	OK	0.38521	0.712379	0.887002	1.18019	0.04175	0.643929
Slc6a13	Slc6a13	chr6:121300295-121337718	Young	Old	OK	4.58984	8.49563	0.888278	2.56553	5e-05	0.00513775
mKIAA1554	mKIAA1554	chr11:119461200-119491235	Young	Old	OK	1.0234	1.89457	0.888496	2.68959	5e-05	0.00513775
Tmem8c	Tmem8c	chr2:27061635-27072161	Young	Old	OK	0.315905	0.585014	0.888981	1.12247	0.03535	0.580413
Cd84	Cd84	chr1:171839696-171890718	Young	Old	OK	0.943208	1.7481	0.890138	2.44288	5e-05	0.00513775
Maff	Maff	chr15:79346620-79359076	Young	Old	OK	0.899695	1.66837	0.890928	2.01665	0.00085	0.0490283
Lgals3	Lgals3	chr14:47373859-47386167	Young	Old	OK	1.15011	2.13368	0.891568	1.86694	0.00135	0.0671365
Lrrc25	Lrrc25	chr8:70616843-70620850	Young	Old	OK	0.532292	0.987658	0.891792	1.4819	0.0127	0.309832
Hlx	Hlx	chr1:184727144-184732493	Young	Old	OK	0.384059	0.714038	0.894672	1.61384	0.008	0.226925
Eif4ebp1	Eif4ebp1	chr8:27260326-27275656	Young	Old	OK	1.91665	3.56405	0.894934	2.01418	0.0009	0.050965
Cyp27a1	Cyp27a1	chr1:74713534-74737897	Young	Old	OK	1.3538	2.51755	0.895002	2.27296	5e-05	0.00513775
Prickle3	Prickle3	chrX:7657378-7671390	Young	Old	OK	0.342374	0.63693	0.895562	1.37738	0.0194	0.407819
Slfn8	Slfn8	chr11:83002157-83020810	Young	Old	OK	0.320465	0.596529	0.896424	1.76858	0.0027	0.107972
Slc22a18	Slc22a18	chr7:143473754-143499332	Young	Old	OK	0.272048	0.506996	0.898112	1.13059	0.0308	0.539382
Csf3r	Csf3r	chr4:126024658-126044975	Young	Old	OK	1.18126	2.20256	0.898848	2.71914	5e-05	0.00513775
Cd48	Cd48	chr1:171682054-171705257	Young	Old	OK	0.921935	1.72025	0.899877	1.60279	0.0067	0.204238
Sphk1	Sphk1	chr11:116531739-116536675	Young	Old	OK	0.68485	1.2803	0.902623	1.48067	0.00955	0.254601
Adamtsl3	Adamtsl3	chr7:82335693-82614448	Young	Old	OK	0.278692	0.521328	0.903516	2.19259	0.0003	0.0221657
Flnc	Flnc	chr6:29433152-29461888	Young	Old	OK	0.75143	1.40603	0.903917	2.89887	5e-05	0.00513775
Ogn	Ogn	chr13:49464058-49652731	Young	Old	OK	3.6332	6.80167	0.904647	2.11575	0.0008	0.0473771
Bdkrb2	Bdkrb2	chr12:105563171-105593071	Young	Old	OK	0.317849	0.59522	0.905083	1.36472	0.0211	0.429643
C1ra	C1ra	chr6:124512620-124523440	Young	Old	OK	0.314571	0.589502	0.906112	1.64266	0.004	0.142676
Gpr160	Gpr160	chr3:30855949-30897194	Young	Old	OK	0.427542	0.801837	0.907242	1.18912	0.02455	0.47319
Gjb2	Gjb2	chr14:57098601-57104702	Young	Old	OK	4.65864	8.75505	0.910206	2.13855	5e-05	0.00513775
Atf3	Atf3	chr1:191170296-191218039	Young	Old	OK	0.944464	1.78172	0.915707	2.11651	0.00055	0.036314
Aim2	Aim2	chr1:173420603-173466036	Young	Old	OK	0.994621	1.88644	0.923444	1.31821	0.02175	0.437708
Bst2	Bst2	chr8:71534261-71537437	Young	Old	OK	7.07188	13.4508	0.927522	2.80842	5e-05	0.00513775
Icam1	Icam1	chr9:21015959-21028796	Young	Old	OK	1.38189	2.63263	0.929859	2.67426	5e-05	0.00513775
Itgb2	Itgb2	chr10:77530347-77565674	Young	Old	OK	3.03826	5.80692	0.934528	3.38112	5e-05	0.00513775
Lgals4	Lgals4	chr7:28833793-28841703	Young	Old	OK	0.43924	0.841039	0.937164	1.46937	0.01275	0.310564
Lag3	Lag3	chr6:124904358-124911705	Young	Old	OK	4.62342	8.85521	0.937566	3.47957	5e-05	0.00513775
Anxa2	Anxa2	chr9:69453682-69491785	Young	Old	OK	7.90108	15.1874	0.942753	3.62479	5e-05	0.00513775
H2-K1	H2-K1	chr17:33996011-34000333	Young	Old	OK	18.4198	35.4064	0.942756	4.38114	5e-05	0.00513775
Dhx58	Dhx58	chr11:100687416-100704271	Young	Old	OK	0.456183	0.877496	0.943781	1.73364	0.0021	0.0907621
Tram2	Tram2	chr1:21001396-21079225	Young	Old	OK	0.260503	0.501859	0.945982	1.24602	0.0331	0.56016
Ptprc	Ptprc	chr1:138062858-138175305	Young	Old	OK	0.918248	1.77402	0.950063	1.69777	0.0027	0.107972
Csf2rb	Csf2rb	chr15:78325797-78353847	Young	Old	OK	0.266703	0.516496	0.953522	1.01906	0.01205	0.300109
H2-T23	H2-T23	chr17:35994503-36121444	Young	Old	OK	3.87888	7.5182	0.954746	1.80769	0.00305	0.118309
Irf8	Irf8	chr8:120736357-120756692	Young	Old	OK	2.01475	3.91725	0.959243	3.18785	5e-05	0.00513775
Slc11a1	Slc11a1	chr1:74375202-74386051	Young	Old	OK	1.14238	2.23838	0.970406	2.51676	0.0001	0.00918107
Mrc1	Mrc1	chr2:14229413-14332023	Young	Old	OK	0.584692	1.14587	0.970701	2.71442	5e-05	0.00513775
Ccl6	Ccl6	chr11:83582060-83623693	Young	Old	OK	1.34769	2.6427	0.971519	2.23328	0.0003	0.0221657
Fgfbp1	Fgfbp1	chr5:43978857-43981799	Young	Old	OK	0.674454	1.32306	0.972092	1.11591	0.03105	0.540709
Slfn2	Slfn2	chr11:83065111-83071246	Young	Old	OK	1.15079	2.2581	0.972483	2.27262	0.00015	0.0126489
Gm10863	Gm10863	chr15:79166065-79217383	Young	Old	OK	0.875281	1.71811	0.973007	1.56561	0.00995	0.260784
Cd14	Cd14	chr18:36725063-36726815	Young	Old	OK	1.45567	2.86563	0.977175	2.4573	0.0001	0.00918107
Gpnmb	Gpnmb	chr6:49036517-49058182	Young	Old	OK	2.6207	5.16182	0.977929	3.67329	5e-05	0.00513775
Gm16551	Gm16551	chr9:74848436-74889647	Young	Old	OK	0.261616	0.516779	0.982095	1.17944	0.0492	0.709468
Angpt2	Angpt2	chr8:18595172-18803188	Young	Old	OK	0.370119	0.733927	0.987646	1.28092	0.03135	0.542542
Efemp1	Efemp1	chr11:28853204-28926743	Young	Old	OK	5.13756	10.1904	0.98805	3.83888	5e-05	0.00513775
Aif1	Aif1	chr17:35170991-35176001	Young	Old	OK	6.48968	12.8883	0.989843	2.9187	5e-05	0.00513775
Gm7120	Gm7120	chr13:119487256-119610459	Young	Old	OK	6.75177	13.443	0.993516	3.88221	5e-05	0.00513775
Tmem106a	Tmem106a	chr11:101582241-101591785	Young	Old	OK	0.460987	0.918161	0.994022	1.95947	0.00155	0.0742278
C1s1	C1s1	chr6:124530343-124542359	Young	Old	OK	0.247151	0.492667	0.995217	1.70122	0.00455	0.15619
Slc22a6	Slc22a6	chr19:8617995-8628299	Young	Old	OK	1.22429	2.44242	0.99637	3.11984	5e-05	0.00513775
Smagp	Smagp	chr15:100621339-100636940	Young	Old	OK	0.733299	1.46539	0.998807	1.57648	0.00365	0.134841
Samsn1	Samsn1	chr16:75858793-75953332	Young	Old	OK	0.62939	1.258	0.999102	1.97606	0.00085	0.0490283
Ms4a6d	Ms4a6d	chr19:11586605-11604804	Young	Old	OK	0.858045	1.71504	0.999117	1.96154	0.00155	0.0742278
Asb11	Asb11	chrX:164436993-164459170	Young	Old	OK	0.540045	1.0802	1.00015	1.80914	0.0027	0.107972
Ptgds	Ptgds	chr2:25466711-25469749	Young	Old	OK	654.908	1310.83	1.00112	4.30013	5e-05	0.00513775
Lat2	Lat2	chr5:134600102-134615025	Young	Old	OK	1.04744	2.10224	1.00506	2.27642	0.00015	0.0126489
Spag6l	Spag6l	chr2:18699021-18760862	Young	Old	OK	1.27905	2.57334	1.00857	2.28226	0.0004	0.0282109
AK006651	AK006651	chr3:94409394-94412912	Young	Old	OK	0.621115	1.25291	1.01235	1.62719	0.0073	0.214928
Ifi47	Ifi47	chr11:49037659-49135387	Young	Old	OK	0.64566	1.30794	1.01845	1.71889	0.004	0.142676
Cnn1	Cnn1	chr9:22099252-22109221	Young	Old	OK	0.344112	0.697305	1.01891	1.32578	0.01945	0.407819
Gpr4	Gpr4	chr7:19212537-19224176	Young	Old	OK	1.15945	2.35209	1.0205	2.17672	0.0002	0.0159138
AK148054	AK148054	chr19:5824709-5845480	Young	Old	OK	22.1047	44.9611	1.02432	4.26171	5e-05	0.00513775
Fmod	Fmod	chr1:134037514-134048277	Young	Old	OK	4.99495	10.1859	1.02803	4.02767	5e-05	0.00513775
Serping1	Serping1	chr2:84765359-84775429	Young	Old	OK	5.0125	10.2699	1.03483	3.84974	5e-05	0.00513775
Mrgprf	Mrgprf	chr7:145300908-145309557	Young	Old	OK	0.315988	0.647446	1.03489	1.66681	0.00535	0.175128
Mdrl	Mdrl	chrX:36814767-36817200	Young	Old	OK	0.272761	0.559187	1.0357	1.2226	0.0398	0.62519
Car13	Car13	chr3:14641726-14663002	Young	Old	OK	0.388541	0.79681	1.03617	1.96027	0.0019	0.0856988
Ptpn6	Ptpn6	chr6:124720706-124738709	Young	Old	OK	1.68705	3.46457	1.03818	2.36998	5e-05	0.00513775
Socs3	Socs3	chr11:117966086-117969366	Young	Old	OK	0.846848	1.74428	1.04246	1.73962	0.00165	0.0771127
Cldn19	Cldn19	chr4:119255440-119262438	Young	Old	OK	0.237995	0.490847	1.04434	1.15077	0.0309	0.540524
Fgl2	Fgl2	chr5:21292960-21424677	Young	Old	OK	1.02136	2.10994	1.04671	2.64852	5e-05	0.00513775
Mustn1	Mustn1	chr14:30879256-30881610	Young	Old	OK	0.945881	1.96249	1.05296	2.05006	0.001	0.0550213
Il1a	Il1a	chr2:129297369-129309972	Young	Old	OK	0.253819	0.528413	1.05787	1.33481	0.0305	0.53716
Akr1b8	Akr1b8	chr6:34354163-34368454	Young	Old	OK	0.51971	1.08381	1.06033	1.76355	0.00345	0.128678
Ifitm3	Ifitm3	chr7:141009589-141010744	Young	Old	OK	16.1133	33.6239	1.06123	3.85977	5e-05	0.00513775
Psmb9	Psmb9	chr17:34182098-34187330	Young	Old	OK	1.79062	3.73751	1.06162	2.17294	0.0004	0.0282109
Eln	Eln	chr5:134702594-134747323	Young	Old	OK	1.3234	2.78016	1.07092	3.44631	5e-05	0.00513775
AK181808	AK181808	chr19:5824709-5845480	Young	Old	OK	12.9721	27.256	1.07117	1.8185	0.0032	0.122294
Iigp1	Iigp1	chr18:60376028-60392629	Young	Old	OK	0.971819	2.04945	1.07648	2.03176	0.0006	0.0383111
Cd180	Cd180	chr13:102693557-102706631	Young	Old	OK	1.13498	2.40793	1.08513	2.85744	5e-05	0.00513775
Tlr2	Tlr2	chr3:83836271-83841608	Young	Old	OK	0.983318	2.08825	1.08657	2.7818	5e-05	0.00513775
AB124611	AB124611	chr9:21526176-21545331	Young	Old	OK	0.24234	0.515344	1.08851	1.27769	0.01855	0.394817
Apold1	Apold1	chr6:134982000-134986836	Young	Old	OK	1.76551	3.75662	1.08935	3.05271	5e-05	0.00513775
Samd9l	Samd9l	chr6:3372257-3399571	Young	Old	OK	0.88357	1.88904	1.09624	3.52337	5e-05	0.00513775
Crabp2	Crabp2	chr3:87948692-87953372	Young	Old	OK	1.23266	2.63648	1.09684	2.08913	0.00085	0.0490283
Gimap4	Gimap4	chr6:48684577-48692062	Young	Old	OK	0.218344	0.469611	1.10486	0.990395	0.0139	0.32777
Cd22	Cd22	chr7:30865403-30880342	Young	Old	OK	0.212748	0.457935	1.10599	0.839837	0.0238	0.465676
Vwf	Vwf	chr6:125532586-125686679	Young	Old	OK	3.78417	8.14652	1.1062	4.04807	5e-05	0.00513775
Ch25h	Ch25h	chr19:34473783-34481546	Young	Old	OK	0.58101	1.255	1.11105	1.52868	0.0229	0.454369
Plekha4	Plekha4	chr7:45526329-45554229	Young	Old	OK	0.487382	1.05983	1.12071	1.4351	0.0151	0.348648
Pf4	Pf4	chr5:90772434-90773383	Young	Old	OK	0.653814	1.42318	1.12217	1.35962	0.0263	0.488708
Ptgis	Ptgis	chr2:167203195-167240537	Young	Old	OK	0.577272	1.25692	1.12257	2.17586	0.00055	0.036314
Gbp3	Gbp3	chr3:142496933-142619176	Young	Old	OK	1.69676	3.69986	1.12469	2.54175	5e-05	0.00513775
Fbxw15	Fbxw15	chr9:109552601-109568262	Young	Old	OK	0.604975	1.32717	1.13341	2.01294	0.00115	0.0600788
F13a1	F13a1	chr13:36867177-37050244	Young	Old	OK	0.417394	0.915791	1.13361	2.24408	5e-05	0.00513775
Lrrc36	Lrrc36	chr8:105413621-105464086	Young	Old	OK	0.278185	0.613468	1.14094	1.77509	0.00225	0.0948668
Capg	Capg	chr6:72544390-72562983	Young	Old	OK	2.63732	5.83173	1.14485	3.127	5e-05	0.00513775
Tmco5	Tmco5	chr2:116878690-116892500	Young	Old	OK	0.283247	0.626476	1.1452	1.3051	0.0235	0.462723
1600023N17Rik	1600023N17Rik	chr5:45668700-45669708	Young	Old	OK	0.22653	0.501377	1.14619	1.27298	0.04175	0.643929
Fmo2	Fmo2	chr1:162875046-162898712	Young	Old	OK	0.455445	1.00865	1.14708	2.2876	5e-05	0.00513775
Defb1	Defb1	chr8:21776554-21795185	Young	Old	OK	0.289554	0.641285	1.14713	1.33722	0.0481	0.702088
Isg15	Isg15	chr4:156199423-156200818	Young	Old	OK	2.32665	5.1531	1.14718	2.50339	5e-05	0.00513775
Serpine1	Serpine1	chr5:137061505-137072272	Young	Old	OK	0.358402	0.795936	1.15108	2.03838	0.00095	0.0528323
Mgp	Mgp	chr6:136872434-136875805	Young	Old	OK	31.3766	69.7115	1.15171	4.73892	5e-05	0.00513775
Epsti1	Epsti1	chr14:77904238-78002656	Young	Old	OK	0.320758	0.714798	1.15605	1.82664	0.00315	0.120979
Cxcl5	Cxcl5	chr5:90759297-90761625	Young	Old	OK	0.621974	1.38892	1.15904	2.17923	0.0007	0.0441512
Fcgr2b	Fcgr2b	chr1:170960558-170976071	Young	Old	OK	1.91461	4.27717	1.1596	3.02074	5e-05	0.00513775
S100a4	S100a4	chr3:90603769-90606045	Young	Old	OK	3.65153	8.19137	1.1656	2.3342	0.00015	0.0126489
Psmb8	Psmb8	chr17:34198194-34201454	Young	Old	OK	2.46344	5.5394	1.16905	3.12509	5e-05	0.00513775
Ltb	Ltb	chr17:35194506-35196305	Young	Old	OK	0.218568	0.492431	1.17184	1.23082	0.02795	0.506035
Trim34a	Trim34a	chr7:104244456-104353358	Young	Old	OK	0.334018	0.754038	1.17471	1.49594	0.0075	0.21833
Mpzl2	Mpzl2	chr9:45042343-45054043	Young	Old	OK	0.38469	0.869197	1.17599	2.44924	0.00025	0.0192985
Tmem140	Tmem140	chr6:34863145-34878065	Young	Old	OK	0.713715	1.61563	1.17868	1.48265	0.00795	0.22675
Pla1a	Pla1a	chr16:38396116-38433145	Young	Old	OK	0.350431	0.794587	1.18107	2.07654	0.00115	0.0600788
Pdzk1ip1	Pdzk1ip1	chr4:115088707-115093894	Young	Old	OK	0.230458	0.522899	1.18203	1.04519	0.03825	0.611212
Bcl2a1b	Bcl2a1b	chr9:89199272-89207838	Young	Old	OK	0.794791	1.80693	1.18489	1.76142	0.004	0.142676
Hcar1	Hcar1	chr5:123876735-123880020	Young	Old	OK	0.389907	0.886829	1.18553	2.52412	0.0002	0.0159138
C2	C2	chr17:34862601-34882100	Young	Old	OK	0.63821	1.45275	1.18668	2.72709	5e-05	0.00513775
C3	C3	chr17:57203966-57228136	Young	Old	OK	1.6741	3.81773	1.18933	4.03477	5e-05	0.00513775
Irf7	Irf7	chr7:141263182-141266424	Young	Old	OK	1.4478	3.31658	1.19584	3.04548	5e-05	0.00513775
Trim30d	Trim30d	chr7:104470013-104507849	Young	Old	OK	0.39857	0.921621	1.20934	2.71497	5e-05	0.00513775
Slc6a12	Slc6a12	chr6:121343087-121365773	Young	Old	OK	0.530604	1.24089	1.22567	2.46244	5e-05	0.00513775
Usp18	Usp18	chr6:121245905-121270917	Young	Old	OK	0.899286	2.1142	1.23326	2.79219	5e-05	0.00513775
Nkx2-9	Nkx2-9	chr12:56611396-56613284	Young	Old	OK	0.279665	0.65942	1.2375	1.60959	0.0167	0.372295
Gbp2	Gbp2	chr3:142620662-142638008	Young	Old	OK	1.80713	4.26701	1.23953	3.86511	5e-05	0.00513775
Spp1	Spp1	chr5:104435110-104441053	Young	Old	OK	8.89951	21.1549	1.24919	4.7017	5e-05	0.00513775
Lox	Lox	chr18:52516059-52577325	Young	Old	OK	0.229147	0.54493	1.2498	2.48845	0.00015	0.0126489
Gpr182	Gpr182	chr10:127749601-127751798	Young	Old	OK	1.33165	3.17533	1.25369	2.72015	5e-05	0.00513775
Dennd1c	Dennd1c	chr17:57066054-57078510	Young	Old	OK	0.292136	0.697115	1.25475	2.26138	0.00075	0.0456353
H2-K2	H2-K2	chr17:33974658-33978791	Young	Old	OK	0.419787	1.00433	1.2585	2.00535	0.0015	0.0727312
Zc3h12a	Zc3h12a	chr4:125118413-125127881	Young	Old	OK	0.278262	0.666876	1.26098	1.51023	0.00545	0.177279
Clec7a	Clec7a	chr6:129461590-129472779	Young	Old	OK	1.39093	3.3545	1.27005	3.21794	5e-05	0.00513775
Cbr2	Cbr2	chr11:120729484-120732021	Young	Old	OK	0.50299	1.21542	1.27285	1.96135	0.0025	0.103717
C4b	C4b	chr17:34728380-34823454	Young	Old	OK	19.7915	47.9968	1.27806	5.25069	5e-05	0.00513775
Tnfrsf11b	Tnfrsf11b	chr15:54250618-54278484	Young	Old	OK	0.246121	0.59777	1.28022	2.26715	0.00035	0.0252586
Asgr1	Asgr1	chr11:70054123-70057895	Young	Old	OK	0.613665	1.4952	1.28481	2.05828	0.00075	0.0456353
Cdh1	Cdh1	chr8:106603349-106670247	Young	Old	OK	0.390078	0.952186	1.28748	2.95503	5e-05	0.00513775
Emp3	Emp3	chr7:45918022-45921426	Young	Old	OK	1.48593	3.63657	1.29121	2.45784	0.00025	0.0192985
Lsp1	Lsp1	chr7:142460811-142516009	Young	Old	OK	1.0291	2.52969	1.29757	2.89654	5e-05	0.00513775
Aldh1a2	Aldh1a2	chr9:71215788-71296243	Young	Old	OK	3.22639	7.95765	1.30242	4.63323	5e-05	0.00513775
Rnf213	Rnf213	chr11:119426061-119430304	Young	Old	OK	0.714513	1.76377	1.30363	1.6758	0.009	0.246721
Anxa1	Anxa1	chr19:20373433-20390672	Young	Old	OK	0.657653	1.62645	1.30633	2.4622	0.00015	0.0126489
Casp12	Casp12	chr9:5345475-5373034	Young	Old	OK	0.279725	0.697195	1.31755	1.63869	0.0086	0.239996
AW112010	AW112010	chr19:11047611-11050566	Young	Old	OK	1.29892	3.26007	1.32759	2.50121	5e-05	0.00513775
Rsad2	Rsad2	chr12:26442742-26456452	Young	Old	OK	0.511807	1.28767	1.33109	3.28764	5e-05	0.00513775
Ctla2b	Ctla2b	chr13:60895350-60897447	Young	Old	OK	0.382736	0.965363	1.33472	1.67507	0.00885	0.245208
Ifit3b	Ifit3b	chr19:34592887-34662419	Young	Old	OK	1.10319	2.78604	1.33653	2.4118	0.00015	0.0126489
Oasl2	Oasl2	chr5:114896933-114912245	Young	Old	OK	1.70592	4.33875	1.34673	4.44124	5e-05	0.00513775
Il2rg	Il2rg	chrX:101264384-101268255	Young	Old	OK	0.506407	1.28807	1.34684	2.40877	5e-05	0.00513775
Slamf9	Slamf9	chr1:172475359-172478409	Young	Old	OK	0.815618	2.07892	1.34987	2.46868	0.00035	0.0252586
Cst7	Cst7	chr2:150570414-150578944	Young	Old	OK	1.9909	5.10304	1.35794	2.84656	0.00015	0.0126489
Klk6	Klk6	chr7:43824543-43832027	Young	Old	OK	4.71981	12.1497	1.36412	4.12941	5e-05	0.00513775
Gm20257	Gm20257	chr1:58652640-58655831	Young	Old	OK	0.349935	0.903482	1.36841	1.73619	0.0086	0.239996
Isg20	Isg20	chr7:78913423-78920396	Young	Old	OK	0.38957	1.00706	1.37019	1.83754	0.00125	0.0635902
Itih2	Itih2	chr2:10094590-10130683	Young	Old	OK	0.836274	2.18689	1.38683	3.72784	5e-05	0.00513775
Itgax	Itgax	chr7:128129567-128150657	Young	Old	OK	0.490662	1.28417	1.38804	2.75505	0.0001	0.00918107
Gpr84	Gpr84	chr15:103308234-103310438	Young	Old	OK	0.774619	2.03273	1.39186	2.59642	0.00025	0.0192985
Ang	Ang	chr14:51091076-51106151	Young	Old	OK	2.27926	6.00061	1.39654	1.26016	0.03515	0.579385
Myzap	Myzap	chr9:71504346-71592360	Young	Old	OK	0.202228	0.534308	1.40169	2.21293	0.0007	0.0441512
Wnt6	Wnt6	chr1:74771891-74785319	Young	Old	OK	0.336328	0.890605	1.40492	2.35419	0.00045	0.0308947
Ifit1	Ifit1	chr19:34592887-34662419	Young	Old	OK	1.21097	3.21081	1.40678	3.13822	5e-05	0.00513775
2018-09-01	2018-09-01	chr7:127214441-127218445	Young	Old	OK	0.248428	0.671212	1.43394	2.03106	0.0023	0.0967122
Bcl3	Bcl3	chr7:19808461-19822755	Young	Old	OK	0.521338	1.41157	1.43702	1.66473	0.0045	0.154816
Clec10a	Clec10a	chr11:70166622-70170836	Young	Old	OK	0.169046	0.467067	1.46621	1.75549	0.0054	0.176022
Ifit3	Ifit3	chr19:34583528-34588982	Young	Old	OK	2.07062	5.74102	1.47124	4.52833	5e-05	0.00513775
Lyz2	Lyz2	chr10:117277540-117282272	Young	Old	OK	16.0707	44.7831	1.47852	5.6543	5e-05	0.00513775
Mx2	Mx2	chr16:97536080-97560901	Young	Old	OK	0.160484	0.447407	1.47916	2.1845	0.0008	0.0473771
Fblim1	Fblim1	chr4:141576061-141606052	Young	Old	OK	0.352314	0.983182	1.48059	3.0807	5e-05	0.00513775
Tgm1	Tgm1	chr14:55700008-55713492	Young	Old	OK	0.154592	0.433231	1.48667	2.06625	0.00145	0.0707491
Cybb	Cybb	chrX:9435253-9469324	Young	Old	OK	0.433252	1.22849	1.50361	3.44309	5e-05	0.00513775
Ms4a6c	Ms4a6c	chr19:11469367-11484577	Young	Old	OK	0.481459	1.38994	1.52954	2.22113	0.0001	0.00918107
Slc47a1	Slc47a1	chr11:61343399-61378075	Young	Old	OK	0.235157	0.689305	1.55152	2.76121	5e-05	0.00513775
Arl11	Arl11	chr14:61309752-61311936	Young	Old	OK	0.443844	1.30379	1.55459	1.67279	0.00185	0.0839316
Oas2	Oas2	chr5:120730332-120749848	Young	Old	OK	0.222147	0.65465	1.55921	1.91035	0.00105	0.0571642
7630403G23Rik	7630403G23Rik	chr9:34042370-34059019	Young	Old	OK	0.211714	0.643528	1.60389	1.76022	0.007	0.210081
St14	St14	chr9:31088589-31131799	Young	Old	OK	0.163122	0.498607	1.61195	2.80144	5e-05	0.00513775
H2-Eb1	H2-Eb1	chr17:34226174-34588543	Young	Old	OK	1.10032	3.36911	1.61444	2.19989	0.00065	0.0413336
Fcgr4	Fcgr4	chr1:171018925-171029761	Young	Old	OK	0.172252	0.527648	1.61505	1.85217	0.00675	0.205359
Wfdc17	Wfdc17	chr11:83704055-83706269	Young	Old	OK	0.437165	1.36679	1.64454	1.41974	0.0248	0.476318
Ifi204	Ifi204	chr1:173747293-173914179	Young	Old	OK	0.225501	0.712968	1.6607	1.83653	0.00425	0.14852
AI662270	AI662270	chr11:83223575-83226584	Young	Old	OK	0.129798	0.412114	1.66677	1.69939	0.0107	0.273962
Ifi44	Ifi44	chr3:151730922-151749959	Young	Old	OK	0.207285	0.672652	1.69825	2.94251	5e-05	0.00513775
AK019375	AK019375	chr4:109976746-109977491	Young	Old	OK	0.129146	0.420569	1.70334	1.13247	0.0461	0.687116
Aspg	Aspg	chr12:112106682-112127573	Young	Old	OK	0.92188	3.02275	1.71321	3.83776	5e-05	0.00513775
Ccl3	Ccl3	chr11:83647842-83649378	Young	Old	OK	0.731329	2.40038	1.71467	2.46267	0.0003	0.0221657
Cd52	Cd52	chr4:134093537-134095073	Young	Old	OK	4.70317	15.4662	1.71741	3.80688	5e-05	0.00513775
Cyp2e1	Cyp2e1	chr7:140763831-140774977	Young	Old	OK	0.177238	0.583067	1.71797	1.65528	0.00265	0.107077
Parp3	Parp3	chr9:106470321-106476949	Young	Old	OK	2.04708	6.77403	1.72644	0.98585	0.03065	0.53919
Gm4951	Gm4951	chr18:60212076-60247820	Young	Old	OK	0.178575	0.597648	1.74277	1.97496	0.00125	0.0635902
V00821	V00821	chr12:113254898-116009879	Young	Old	OK	4.90692	16.4774	1.7476	1.03308	0.0275	0.502901
Ccl12	Ccl12	chr11:82101844-82103399	Young	Old	OK	1.04048	3.4998	1.75003	2.47722	0.00045	0.0308947
Sult1c1	Sult1c1	chr17:53961614-53990631	Young	Old	OK	0.280127	0.956138	1.77114	2.60839	0.0002	0.0159138
H2-Ab1	H2-Ab1	chr17:34226174-34588543	Young	Old	OK	1.95029	6.68768	1.77782	2.07322	0.0006	0.0383111
Cd74	Cd74	chr18:60803848-60812652	Young	Old	OK	4.73721	16.4971	1.8001	5.93731	5e-05	0.00513775
Cbln3	Cbln3	chr14:55878919-55884256	Young	Old	OK	0.180664	0.63937	1.82334	3.56838	5e-05	0.00513775
H2-Aa	H2-Aa	chr17:34226174-34588543	Young	Old	OK	1.58858	5.64159	1.82836	1.94233	0.00645	0.199757
Mx1	Mx1	chr16:97447034-97462906	Young	Old	OK	0.115573	0.413243	1.83819	1.02354	0.01015	0.264241
Slamf8	Slamf8	chr1:172581376-172590568	Young	Old	OK	0.125307	0.451446	1.84908	2.21029	0.00205	0.0888486
Ly9	Ly9	chr1:171588612-171607410	Young	Old	OK	0.282535	1.02395	1.85764	2.93405	5e-05	0.00513775
Ms4a7	Ms4a7	chr19:11321038-11336146	Young	Old	OK	0.237689	0.869728	1.87149	2.30505	0.00075	0.0456353
Lrg1	Lrg1	chr17:56119677-56121946	Young	Old	OK	0.653336	2.40376	1.87939	3.67893	5e-05	0.00513775
Cytl1	Cytl1	chr5:37735518-37739820	Young	Old	OK	0.504231	1.94591	1.94829	2.8078	5e-05	0.00513775
Hcar2	Hcar2	chr5:123863569-123865516	Young	Old	OK	0.109833	0.426433	1.95701	2.22348	0.0041	0.145573
Pdcd1	Pdcd1	chr1:94038304-94052553	Young	Old	OK	0.102111	0.418106	2.03373	2.24977	0.00275	0.109408
Wisp1	Wisp1	chr15:66891392-66923199	Young	Old	OK	0.202824	0.838203	2.04707	1.50136	0.0104	0.26805
Gabra6	Gabra6	chr11:42306436-42321072	Young	Old	OK	0.0816211	0.44349	2.44189	2.63097	0.0003	0.0221657
Cxcl10	Cxcl10	chr5:92331826-92414627	Young	Old	OK	0.675529	3.87873	2.5215	2.26222	0.01005	0.262961
Ccl5	Ccl5	chr11:83525778-83530518	Young	Old	OK	0.388789	2.26809	2.54442	2.85558	0.003	0.117545
Lcn2	Lcn2	chr2:32384636-32387739	Young	Old	OK	0.765439	4.73123	2.62786	4.13696	5e-05	0.00513775
Xlr	Xlr	chrX:53777117-53797706	Young	Old	OK	0.0525645	0.412948	2.9738	1.14419	0.0095	0.254141
Gm14005	Gm14005	chr2:128298662-128429351	Young	Old	OK	0.0664538	0.551479	3.05288	1.14	0.01785	0.386277
Prl	Prl	chr13:27057569-27065203	Young	Old	OK	3.13798	32.0665	3.35316	8.38484	5e-05	0.00513775
Cga	Cga	chr4:34893778-34907374	Young	Old	OK	0.109549	1.14623	3.38725	2.11522	0.0239	0.466456
M13680	M13680	chr12:113254898-116009879	Young	Old	OK	10.1982	172.937	4.08386	2.30562	0.0244	0.47147
Cxcl13	Cxcl13	chr5:95956938-95961068	Young	Old	OK	0.0614864	1.30013	4.40225	3.34935	0.01575	0.359907
Jchain	Jchain	chr5:88519808-88527897	Young	Old	OK	0.103554	3.24731	4.97079	6.326	5e-05	0.00513775
M34473	M34473	chr6:67555635-70740554	Young	Old	OK	0.5177	40.0737	6.2744	8.128	5e-05	0.00513775
Ccl8	Ccl8	chr11:82115184-82116799	Young	Old	OK	0	1.24789	inf	inf	5e-05	0.00513775
AK085253	AK085253	chr13:14996762-15094914	Young	Old	OK	2.19797	0	inf	inf	0.01265	0.309098
Mir8114	Mir8114	chr1:153849541-153909723	Young	Old	OK	36.9616	0	inf	inf	0.0492	0.709468

## Sheet: DR-ameliorate ODEG
Gene Symbol
1600023N17Rik
7630403G23Rik
A230001M10Rik
A2m
A4galt
AB124611
AF251705
AI506816
AI662270
AK006651
AK019375
AK021325
AK038603
AK089125
AK141565
AK148054
AK181808
AW112010
Abca8a
Acvrl1
Adamts1
Adamtsl3
Adamtsl4
Adap2
Adcy7
Adgrl4
Adm
Adssl1
Ahnak
Aif1
Aim2
Akna
Akr1b8
Alas2
Aldh1a1
Aldh1a2
Aldh1l2
Alox5ap
Ampd3
Ang
Anln
Anxa1
Anxa2
Anxa3
Anxa4
Anxa5
Aox1
Aox3
Apbb1ip
Apln
Apobec1
Apobec3
Apobr
Apod
Apold1
Appl2
Arap3
Arhgap18
Arhgap29
Arhgap30
Arhgap4
Arhgdib
Arl11
Arpc1b
As3mt
Asap3
Asb11
Asgr1
Aspa
Aspg
Atf3
Atoh8
Atp1b3
B2m
Bcas1
Bcat2
Bcl2a1b
Bcl3
Bdh2
Bdkrb2
Bhlhe41
Bicc1
Bin2
Bmp6
Bmp7
Bst2
Btg2
C030029H02Rik
C1qa
C1qb
C1qc
C1s1
C2
C3
C3ar1
C4b
C5ar1
Capg
Car13
Car2
Car8
Card10
Casp12
Casp8
Cast
Catip
Cav1
Cbln3
Cbr2
Ccl12
Ccl28
Ccl3
Ccl5
Ccl6
Ccl8
Ccl9
Ccr5
Cd109
Cd14
Cd151
Cd180
Cd22
Cd274
Cd302
Cd33
Cd37
Cd44
Cd48
Cd52
Cd53
Cd63
Cd68
Cd74
Cd82
Cd83
Cd84
Cd86
Cd9
Cdc42ep1
Cdc42ep2
Cdc42ep5
Cdh1
Cdh19
Cdk5rap3
Cebpd
Cercam
Cfh
Cga
Ch25h
Clasrp
Cldn14
Cldn19
Clec10a
Clec14a
Clec2d
Clec3b
Clec5a
Clec7a
Clic1
Clic4
Col11a2
Col18a1
Col27a1
Col4a6
Col5a2
Col6a1
Col6a3
Col9a2
Cox8b
Cp
Cped1
Cpq
Cpxm2
Crispld2
Crlf2
Crot
Cryab
Csf1
Csf1r
Csf2ra
Csf2rb
Csf2rb2
Csf3r
Cst7
Cstb
Ctnnal1
Ctsc
Ctsd
Ctsh
Ctsk
Ctsl
Ctss
Ctsz
Cx3cr1
Cxcl10
Cxcl12
Cxcl13
Cxcl16
Cxcl5
Cyba
Cybb
Cyp1b1
Cyp27a1
Cyp2j12
Cyth4
Cytl1
D7Ertd443e
Dab2
Dap
Dcn
Dcxr
Ddo
Ddr2
Ddx58
Defb1
Dennd1c
Dhx58
Dlk1
Dmp1
Dmpk
Dnajc24
Dnase2a
Dock8
Dusp12
E4f1
Ecm1
Ecscr
Edn1
Edn3
Efemp1
Efemp2
Ehd4
Eif2ak2
Eif4ebp1
Eln
Elovl1
Emilin1
Emp1
Emp3
Eng
Enpp6
Entpd1
Eps8l1
Epsti1
Erbb2ip
Ermn
Esyt1
Etnppl
Evc
Eya4
F11r
F13a1
Fah
Fam129a
Fam129b
Fam183b
Fblim1
Fbln1
Fbxo32
Fbxw15
Fcer1g
Fcgr1
Fcgr2b
Fcgr3
Fcgr4
Fermt3
Fes
Fgd2
Fgl2
Fhod1
Firre
Flna
Flnb
Flnc
Fmo5
Fn1
Foxc1
Foxd1
Fth1
Ftl1
Ftx
Fxyd1
Fxyd5
Fyb
Fyco1
Gab2
Gabra6
Galnt6
Gatm
Gbp2
Gbp3
Gbp5
Gbp7
Gfap
Ggta1
Gimap4
Ginm1
Gjb1
Gjb2
Glipr2
Gltp
Gm10863
Gm14005
Gm16551
Gm20257
Gm4951
Gm7120
Gna15
Gng11
Gpnmb
Gpr108
Gpr160
Gpr182
Gpr34
Gpr4
Gpr84
Gpsm3
Grn
Gstt2
Gstt3
H2-Aa
H2-Ab1
H2-D1
H2-Eb1
H2-K1
H2-K2
H2-M3
H2-T23
Hapln2
Havcr2
Hba-a2
Hbb-b2
Hbb-bs
Hcar1
Hcar2
Hck
Hcls1
Helz2
Hexa
Hexb
Hfe
Hhatl
Hk2
Hlx
Hmox1
Hpgds
Hrct1
Hs3st3a1
Hspa12b
Hspb8
Htra3
I830077J02Rik
Icam1
Icosl
Ier3
Ifi203
Ifi204
Ifi27
Ifi30
Ifi44
Ifi47
Ifih1
Ifit1
Ifit2
Ifit3
Ifit3b
Ifitm1
Ifitm3
Igf2
Igfbp6
Igtp
Iigp1
Il10rb
Il18
Il18bp
Il1a
Il21r
Il2rg
Il33
Il4ra
Inpp5d
Irak3
Irf1
Irf7
Irf8
Irf9
Irgm1
Irgm2
Isg15
Isg20
Islr
Itga5
Itgam
Itgax
Itgb2
Itgb5
Itih2
Itpr3
Itpripl2
Jag1
Jchain
Kazald1
Kcne1l
Kif13b
Klhl4
Klhl6
Klk6
Lag3
Lair1
Lamp2
Laptm5
Lat2
Lca5l
Lcn2
Lcp1
Leng8
Lgals3
Lgals3bp
Lgals4
Lgals9
Lgi4
Lhfp
Lipo1
Litaf
Lox
Lpcat2
Lpin3
Lrg1
Lrrc25
Lrrc36
Lsp1
Lum
Ly6a
Ly6c1
Ly6g6f
Ly86
Ly9
Lyn
Lyz2
M13680
M34473
Maff
Mag
Magt1
Mall
Man2b1
Mboat1
Mbp
Mgp
Mgst1
Miat
Micall1
Mir124a-1hg
Mlh1
Mlph
Mlxipl
Mmrn2
Mndal
Mobp
Mocos
Mpeg1
Mpzl3
Mr1
Mrc1
Mrc2
Ms4a6c
Ms4a6d
Ms4a7
Msn
Mtus1
Mvp
Mx1
Mx2
Mxra8
Myl12a
Myo1d
Myo1f
Myoc
Myzap
Naalad2
Naip2
Ncf2
Ncf4
Nckap1l
Neurl3
Nfe2l2
Nipal4
Nkx2-9
Nmi
Nos3
Npc2
Nr1h3
Nrbp2
Nt5e
Ntn4
Nupr1
Oas2
Oasl2
Olfml1
Olfml3
Oma1
Osmr
Oxsr1
P2rx4
P2ry6
Padi2
Pan2
Parp12
Parp14
Parp3
Parvg
Pcolce
Pcsk6
Pctp
Pdcd1
Pdlim2
Pdpn
Pecam1
Pf4
Pglyrp1
Phldb1
Pik3ap1
Pik3r5
Pir
Pisd-ps1
Pisd-ps2
Pla1a
Pla2g4a
Plau
Plce1
Plcg2
Pld4
Plek
Plekha4
Plekhb1
Plekhn1
Plekho2
Plin2
Plin3
Plpp2
Pls1
Plxnb3
Pmp22
Pnisr
Pnpla7
Podxl
Pou2f2
Ppl
Ppp1r14a
Prickle3
Prl
Pros1
Prr18
Prr5l
Prrg1
Psmb8
Psmb9
Ptgds
Ptges
Ptgfr
Ptgs2
Ptpn6
Ptprb
Ptprc
Ptrf
Pycard
Qdpr
Rab7b
Rac2
Ranbp3l
Rasa4
Rasal3
Rasgrp3
Rassf2
Rassf4
Rbp1
Rcn3
Reck
Reep4
Renbp
Rgl2
Rgl3
Rhoc
Rhoj
Rida
Rnf213
Robo3
Rpp38
Rps10
Rps6kb2
Rreb1
Rsad2
Rtp4
Runx1
S100a11
S100a4
S100a6
S100b
Samd9l
Samsn1
Sat1
Scara3
Scarf2
Scel
Scn7a
Scpep1
Sdf2l1
Sdpr
Sec14l5
Sepp1
2018-09-01
Serpina3n
Serpinb1a
Serpinb6b
Serpinb9
Serpine1
Serpinf1
Serping1
Sfi1
Shc1
Shtn1
Siglecf
Sirt4
Skap2
Slamf8
Slamf9
Slc11a1
Slc13a3
Slc13a4
Slc14a1
Slc16a11
Slc1a5
Slc22a6
Slc22a8
Slc26a10
Slc37a2
Slc38a3
Slc38a5
Slc39a8
Slc46a3
Slc47a1
Slc52a3
Slc6a12
Slc6a13
Slfn2
Slfn5
Slfn8
Smad6
Sncg
Sned1
Snhg11
Snx1
Snx9
Socs3
Sox13
Sp100
Spaca6
Spi1
Spp1
Srgn
Srpk3
Ssc5d
Ssh3
Sspn
St14
Stab1
Stat1
Stat3
Stat5a
Steap3
Stom
Stxbp2
Stxbp3
Sult1c1
Syne3
Tagln2
Tal1
Tap1
Tap2
Tapbp
Tatdn3
Tbx1
Tbx18
Tcirg1
Tcn2
Tfcp2l1
Tfpi
Tgfbi
Tgfbr2
Tgfbr3l
Tgm1
Tgm2
Thbd
Thbs2
Themis2
Thrsp
Tinagl1
Tlr13
Tlr2
Tlr4
Tlr7
Tm4sf1
Tmem106a
Tmem140
Tmem173
Tmem176a
Tmem176b
Tmem252
Tmem37
Tmem63a
Tmem88b
Tmem8c
Tmprss5
Tnfrsf11b
Tnfrsf18
Tnfrsf1a
Tnfrsf1b
Tnfsf10
Tns2
Tor3a
Tor4a
Tpm4
Tppp3
Tram2
Trem2
Trf
Trim21
Trim30a
Trim30d
Trim34a
Trmt13
Tspo
Txlnb
Txnip
Tyrobp
Uaca
Ube2l6
Ubxn11
Ucp2
Unc93b1
Upk1b
Usp18
V00821
Vamp5
Vamp8
Vasp
Vav1
Vcam1
Vegfa
Vim
Vps33b
Vstm4
Vtn
Vwa1
Vwa5a
Vwf
Wdfy4
Wdsub1
Wfdc17
Wipf1
Wisp1
Xaf1
Xdh
Xist
Zbtb42
Zc3h12a
Zc3hav1
Zic1
Zic4
mKIAA1554

## Sheet: DR-ameliorate UDEG
Gene Symbol
1500015O10Rik
4930539E08Rik
4931408D14Rik
AK013627
AK135172
AK187054
Abcg4
Actn3
Adamts3
Adgrl3
Aff2
Ankrd63
Aqp1
Arhgap32
Arhgap36
Arntl
Arpp21
Atp2b4
Bcl9l
Bmp3
Brinp2
Brwd3
Btaf1
Cacna2d3
Cacnb2
Cartpt
Casp3
Cbln4
Ccdc42
Cckbr
Cdh13
Cdh4
Cdkl4
Cfap52
Chl1
Chrm4
Chsy3
Cldn1
Cldn2
Cntnap2
Cntnap3
Cntnap4
Cpne5
Cux2
D430041D05Rik
Dbpht2
Dcc
Dmrta2
Dner
Dpp10
Dpysl3
Dpysl5
Dtl
Ecel1
Epha6
F5
Fgfbp3
Folr1
Fosb
Foxo6
Fstl5
Gabra3
Gap43
Gm11627
Gng4
Gpr161
Gpr165
Gpr17
Gpr26
Gpr6
Gpr88
Grik3
Grin2b
Grin3a
Grm2
Hcn1
Hdac9
Hecw1
Helz
Henmt1
Hes5
Homer1
Hrk
Hs6st2
Hs6st3
Htr4
Ide
Igsf21
Kcne2
Kcnf1
Kcnh7
Kdm5b
Kirrel2
Kl
Klf10
Klf5
Klhl11
L1cam
Lmtk2
Lnpep
Lypd1
Lzts1
Map3k9
2018-03-09
Marcks
Marcksl1
Mef2c
Meis2
Mex3a
Mir8114
Mn1
Moxd1
Mycn
Myo16
Nav3
Ncan
Ndst4
Necab1
Negr1
Nlgn3
Nog
Nova2
Nptx2
Nr4a2
Nr4a3
Nrip1
Ntsr1
Nwd2
Olfm2
Osbpl10
Paqr9
Pcdh18
Pcdh7
Peg3
Penk
Per1
Pgam2
Pgap1
Pgm2l1
Pgpep1
Pitpnm3
Plcxd2
Plcxd3
Plppr1
Plxnd1
Pom121
Ppp1r3g
Prkar2b
Prkg2
Prokr2
Prss12
Ptchd4
Pvrl1
Rab3b
Raph1
Rasgef1c
Rcor2
Reln
Rprm
Rps6ka2
Rrad
Satb2
Scn5a
Sec14l3
Slc25a30
Slc29a4
Slc35f1
Slc39a10
Slc4a8
Sostdc1
Sox11
Sox4
Sstr4
Steap2
Stx1a
Syt5
Tbc1d9
Tbl1xr1
Tbr1
Tctn2
Tekt5
Tenm1
Tenm3
Tmem130
Tmem132a
Tmem132e
Tmem215
Tnc
Tnik
Tox3
Ttc9b
Ttr
Usp29
Usp43
Vwc2l
Wfs1
Xylt1
Zcchc12
Zdbf2
Zdhhc2
Zfp184
Zmat3
Zswim6

## Sheet: RALL-ameliorate UDEG
Gene Symbol
1500015O10Rik
4930539E08Rik
4931408D14Rik
AI414108
AK013627
AK138476
Abcg4
Actn3
Adgrl3
Aqp1
Arhgap36
Bmp3
Brinp2
Brwd3
Btaf1
Cacna2d3
Cacnb2
Casp3
Cbx2
Ccdc42
Cdh3
Cdh6
Cdkl4
Cdr1
Cfap52
Chl1
Chsy3
Cldn1
Cldn2
Clic6
Cntnap2
Cpne5
Cux2
D430041D05Rik
Dbpht2
Dcc
Dcx
Dmrta2
Dpysl3
Dpysl5
Dtl
Enpp2
Epha5
Epha6
F5
Fgfbp3
Fnbp1l
Folr1
Fosb
Foxo6
Fstl5
Gap43
Glra2
Gm11627
Gpr161
Gpr17
Gpr88
Grik3
Grin2b
Grm2
Helz
Henmt1
Homer1
Hrk
Hs6st2
Htr2c
Htr4
Ide
Igfbpl1
Igsf21
Kcne2
Kcnf1
Kcnh7
Kdm5b
Kirrel2
Kl
Klf10
Klhl11
L1cam
Lbp
Lmtk2
Lnpep
Lypd1
2018-03-09
Marcks
Marcksl1
Mef2c
Meis2
Mex3a
Mir8114
Mn1
Moxd1
Myh7
Myo16
Nav3
Ncan
Ndn
Ndst4
Negr1
Nlgn3
Nog
Nova2
Nptx2
Nr4a2
Nr4a3
Nrep
Nrip1
Nts
Nwd2
Nxph4
Olfm2
Osbpl10
Paqr9
Pcdh18
Per1
Pgam2
Pgm2l1
Pgpep1
Pitpnm3
Plppr1
Pom121
Pomc
Ppp1r3g
Prkar2b
Prkg2
Prokr2
Prss12
Ptchd4
Ptpro
Pvrl1
Raph1
Rasgef1c
Rcor2
Reln
Rprm
Rps6ka2
Rrad
Satb2
Scn5a
Sema3f
Sema6a
Six3
Slc25a30
Slc29a4
Slc35f1
Slc39a10
Slc4a5
Slc4a8
Sncaip
Sostdc1
Sox11
Sox4
Sstr4
Steap2
Syt5
Tbc1d9
Tbl1xr1
Tbr1
Tctn2
Tekt5
Tenm1
Tenm3
Tmem132a
Tmem215
Tmem72
Tnc
Tnik
Tox3
Tshz2
Ttc9b
Ttr
Usp43
Vat1l
Vwc2l
Wfs1
Zdbf2
Zdhhc2
Zfp184
Zmat3
Zswim6

## Sheet: RALL-ameliorate ODEG
Gene Symbol
1600023N17Rik
7630403G23Rik
A230001M10Rik
A4galt
AB124611
AF251705
AK006651
AK019375
AK021325
AK038603
AK089125
AK134520
AK141565
AK148054
AK181808
AK202301
Abca8a
Abca9
Acvrl1
Adamts1
Adamtsl3
Adamtsl4
Adap2
Adcy7
Adgrg6
Adssl1
Aif1
Aim2
Akr1b8
Alas2
Aldh1a1
Aldh1a2
Aldh1l2
Ampd3
Ang
Anln
Anxa1
Anxa2
Anxa3
Anxa4
Anxa5
Aox3
Apbb1ip
Apln
Apobec1
Apobr
Apod
Apold1
Appl2
Arap3
Arhgap18
Arhgap29
Arhgap30
Arhgap4
Arl11
Arpc1b
As3mt
Asap3
Asb11
Asgr1
Aspa
Aspg
Atf3
Atoh8
Atp1b3
Bcas1
Bcat2
Bdkrb2
Bhlhe41
Bicc1
Btg2
C030029H02Rik
C1qa
C1qb
C1qc
C2
C3ar1
C4b
C5ar1
Capg
Car13
Car2
Car8
Card10
Casp8
Cast
Catip
Cav1
Cbln3
Cbr2
Ccl28
Ccl3
Ccl6
Ccr5
Cd109
Cd14
Cd151
Cd180
Cd22
Cd302
Cd33
Cd37
Cd44
Cd48
Cd68
Cd83
Cd84
Cd86
Cd9
Cdc42ep1
Cdc42ep2
Cdc42ep5
Cdh1
Cdh19
Cdk5rap3
Cercam
Cfh
Cga
Ch25h
Clasrp
Cldn14
Cldn19
Clec14a
Clec2d
Clec7a
Clic4
Col11a2
Col27a1
Col5a2
Col6a1
Col6a2
Col6a3
Col9a2
Colec12
Cped1
Crlf2
Crot
Cryab
Csf1
Csf1r
Csf2ra
Csf3r
Cst7
Cstb
Ctnnal1
Ctsd
Ctsh
Ctsk
Ctss
Ctsz
Cx3cr1
Cxcl10
Cxcl12
Cxcl13
Cxcl5
Cyba
Cybb
Cyp27a1
Cyp2e1
Cyp2j12
Cyth4
D7Ertd443e
Dap
Dcdc2a
Dcn
Dcxr
Ddo
Defb1
Dennd1c
Dhx58
Dlk1
Dmp1
Dmpk
Dnajc24
Dnase2a
Dock8
Dusp12
E4f1
Edn1
Edn3
Efemp1
Ehd4
Eif2ak2
Eif4ebp1
Elovl1
Emp1
Eng
Enpp6
Erbb2ip
Ermn
Esyt1
Etnppl
Evc
Exoc3l4
Eya2
Eya4
Fah
Fam129b
Fam183b
Fblim1
Fbln1
Fbxo32
Fbxw15
Fcer1g
Fermt3
Fes
Fhod1
Firre
Flnb
Flnc
Fmo2
Fmo5
Foxc1
Foxd1
Fth1
Ftl1
Ftx
Fxyd5
Fyb
Fyco1
Gab2
Gabra6
Galnt6
Gatm
Gfap
Ggta1
Gjb1
Gjb2
Glipr2
Gltp
Gm10863
Gm14005
Gm16551
Gm20257
Gm5086
Gm7120
Gna15
Gng11
Gpnmb
Gpr108
Gpr160
Gpr182
Gpr34
Gpr4
Gpr84
Gpsm3
Grn
Gstt3
H2-K2
H2-M3
Hapln2
Hba-a2
Hbb-b2
Hbb-bs
Hcar1
Hck
Hcls1
Helz2
Hexa
Hexb
Hfe
Hhatl
Hhex
Hk2
Hlx
Hpgds
Hrct1
Hs3st3a1
Hspa12b
Hspb8
Htra3
I830077J02Rik
Ifi203
Ifi44
Ifih1
Ifit1
Ifit2
Ifit3
Ifit3b
Igfbp6
Il10rb
Il13ra1
Il18
Il1a
Il21r
Il33
Il4ra
Inpp5d
Irak3
Irf7
Irf8
Irf9
Isg15
Isg20
Islr
Itgam
Itgax
Itgb2
Itgb5
Itih2
Itpr3
Itpripl2
Jag1
Kazald1
Kcne1l
Kdr
Kif13b
Klf2
Klf4
Klhl4
Klhl6
Klk6
Lag3
Lair1
Laptm5
Lat2
Lca5l
Lcn2
Leng8
Lgals4
Lgals9
Lgi4
Lhfp
Lipo1
Litaf
Lox
Lpcat2
Lpin3
Lrrc25
Lrrc36
Lsp1
Lum
Ly6g6f
Ly86
Ly9
Lyz2
Maff
Mag
Magt1
Man2b1
Mboat1
Mbp
Mdrl
Mgp
Miat
Micall1
Mir124a-1hg
Mlh1
Mlph
Mlxipl
Mobp
Mocos
Mpeg1
Mpzl3
Mr1
Mrc1
Mrc2
Ms4a6d
Ms4a7
Msn
Mtus1
Mvp
Mx1
Mx2
Myl12a
Myo1d
Myo1f
Myoc
Myzap
Naalad2
Ncf2
Nckap1l
Nes
Neurl3
Nfe2l2
Nipal4
Nkx2-9
Nmi
Nos3
Nr1h3
Nrbp2
Nt5e
Nupr1
Oas2
Oasl2
Olfml1
Olfml3
Oma1
Osmr
Osr1
Oxsr1
P2rx4
P2ry6
Padi2
Pan2
Parp12
Parp3
Parvg
Pcsk6
Pctp
Pdlim2
Pf4
Pglyrp1
Phldb1
Pik3ap1
Pir
Pisd-ps1
Pisd-ps2
Plau
Plce1
Plcg2
Pld4
Plek
Plekha4
Plekhb1
Plekhn1
Plekho2
Plin3
Plpp2
Pls1
Plxnb3
Pmp22
Pnisr
Pnpla7
Podxl
Pou2f2
Ppl
Ppp1r14a
Prickle3
Prl
Pros1
Prr18
Prr5l
Prrg1
Ptgds
Ptges
Ptgfr
Ptgs2
Ptprc
Pycard
Qdpr
Rab7b
Ranbp3l
Rasa4
Rasal3
Rasgrp3
Rassf2
Rassf4
Rcn3
Reck
Reep4
Renbp
Rgl2
Rgl3
Rhoj
Rida
Rnf213
Robo3
Rpp38
Rps10
Rps6kb2
Rreb1
Rsad2
Runx1
S100a6
S100b
Samd9l
Samsn1
Sat1
Scara3
Scarf2
Scel
Scn7a
Sdpr
Sec14l5
Sepp1
Serpina3n
Serpinb1a
Serpinb9
Serpinf1
Sfi1
Shtn1
Sirt4
Skap2
Slamf9
Slc11a1
Slc13a3
Slc14a1
Slc16a11
Slc1a5
Slc22a6
Slc26a10
Slc38a5
Slc39a8
Slc46a3
Slc47a1
Slc6a12
Slc6a13
Slc6a20a
Slc7a11
Slfn5
Slfn8
Smagp
Smoc1
Smpdl3b
Sned1
Snhg11
Snx1
Snx9
Socs3
Sox13
Sp100
Spaca6
Spag6l
Sphk1
Spi1
Spp1
Srpk3
Ssc5d
Ssh3
Sspn
St14
Stab1
Stat3
Steap3
Stom
Stxbp2
Stxbp3
Sult1c1
Synpo2
Tal1
Tatdn3
Tbx1
Tbx18
Tcirg1
Tfcp2l1
Tfpi
Tgfbr2
Tgfbr3l
Tgm1
Thbs2
Themis2
Thrsp
Tlr13
Tlr2
Tlr4
Tlr7
Tm4sf1
Tmco5
Tmem106a
Tmem140
Tmem173
Tmem176a
Tmem176b
Tmem37
Tmem63a
Tmem88b
Tmem8c
Tmprss5
Tnfrsf11b
Tnfrsf18
Tnfrsf1a
Tnfrsf1b
Tnfsf10
Tns2
Tor4a
Tppp3
Tram2
Trem2
Trf
Trim34a
Trmt13
Txlnb
Tyrobp
Ube2l6
Ubxn11
Unc93b1
Upk1b
Usp18
Vamp5
Vav1
Vegfa
Vim
Vps33b
Vtn
Vwa1
Vwa5a
Wdfy4
Wdsub1
Wipf1
Wisp1
Xist
Zbtb42
Zc3h12a
Zc3hav1
Zfp36l2
Zic1
Zic4
