# Supplementary material for: Dietary Restriction and Rapamycin Affect Brain Aging in Mice by Attenuating Age-Related DNA Methylation Changes
Source: Genes (Basel). 2022 Apr 15;13(4):699. doi: 10.3390/genes13040699 (PMC9030181; doi:10.3390/genes13040699)
Supplement: Supplementary file 1 [file genes-13-00699-s001.zip › Table S2 - GO Enrichment of DR-DEGs.xlsx]

## Sheet: GO of DR-ameliorate UDEGs
# Generated by GOATOOLS v0.8.4 (2021-06-09)
# min_ratio=None pval=0.05
GO	NS	enrichment	name	ratio_in_study	ratio_in_pop	p_uncorrected	depth	study_count	p_bonferroni	p_sidak	p_holm	study_items
GO:0007411	BP	e	axon guidance	10/202	134/32695	1.64e-07	n.a.	10	0.00195	0.0019	0.00195	Cdh4, Chl1, Dcc, Dpysl5, Gap43, L1cam, Lmtk2, Nog, Nr4a3, Reln
GO:0007399	BP	e	nervous system development	16/202	381/32695	8.29e-07	n.a.	16	0.00984	0.0096	0.00984	Chl1, Dcc, Dpysl3, Dpysl5, Gap43, Hdac9, Hes5, L1cam, Lmtk2, Mef2c, Nav3, Nr4a2, Pcdh18, Plppr1, Sox11, Tnik
GO:0007155	BP	e	cell adhesion	15/202	518/32695	9.25e-07	n.a.	15	0.011	0.0107	0.011	Cdh13, Cdh4, Chl1, Cntnap2, Cntnap4, Hes5, L1cam, Ncan, Negr1, Nlgn3, Pcdh18, Pcdh7, Reln, Tenm3, Tnc
GO:0007165	BP	e	signal transduction	24/202	1261/32695	1.11e-06	n.a.	24	0.0132	0.0128	0.0131	Adgrl3, Arhgap32, Arhgap36, Cckbr, Chrm4, Gabra3, Gng4, Gpr161, Gpr17, Gpr26, Gpr6, Gpr88, Grm2, Htr4, Ntsr1, Plcxd2, Plcxd3, Plppr1, Plxnd1, Prokr2, Rrad, Sstr4, Tenm1, Tenm3
GO:0007156	BP	e	homophilic cell adhesion via plasma membrane adhesion molecules	7/202	91/32695	1.62e-06	n.a.	7	0.0192	0.0187	0.0192	Cdh13, Cdh4, Chl1, Igsf21, L1cam, Pcdh18, Tenm3
GO:0045944	BP	e	positive regulation of transcription by RNA polymerase II	23/202	1116/32695	1.82e-06	n.a.	23	0.0216	0.0211	0.0216	Arntl, Bcl9l, Bmp3, Cdh13, Fosb, Foxo6, Hes5, Klf10, Klf5, Mef2c, Meis2, Mycn, Nog, Nr4a2, Nr4a3, Nrip1, Peg3, Per1, Satb2, Sox11, Sox4, Tbl1xr1, Tbr1
GO:0003211	BP	e	cardiac ventricle formation	3/202	5/32695	2.3e-06	n.a.	3	0.0273	0.0266	0.0273	Mef2c, Sox11, Sox4
GO:0007612	BP	e	learning	6/202	64/32695	2.87e-06	n.a.	6	0.0341	0.0332	0.0341	Cntnap2, Grin2b, Nlgn3, Ntsr1, Prkar2b, Reln
GO:0007275	BP	e	multicellular organism development	21/202	1095/32695	4.84e-06	n.a.	21	0.0574	0.056	0.0574	Bmp3, Cdh13, Cdh4, Chl1, Dcc, Dner, Epha6, Gap43, Gpr161, Hes5, L1cam, Lmtk2, Mef2c, Meis2, Mn1, Nog, Plxnd1, Reln, Satb2, Sox11, Vwc2l
GO:0007157	BP	e	heterophilic cell-cell adhesion via plasma membrane cell adhesion molecules	5/202	44/32695	7.65e-06	n.a.	5	0.0908	0.0885	0.0907	Cdh4, Igsf21, L1cam, Tenm1, Tenm3
GO:0007218	BP	e	neuropeptide signaling pathway	6/202	80/32695	1.06e-05	n.a.	6	0.126	0.123	0.126	Cartpt, Ecel1, Ntsr1, Penk, Sstr4, Tenm1
GO:0000122	BP	e	negative regulation of transcription by RNA polymerase II	17/202	807/32695	1.24e-05	n.a.	17	0.147	0.143	0.147	Cux2, Foxo6, Hdac9, Hes5, Klf5, Mef2c, Nog, Nr4a2, Nr4a3, Nrip1, Peg3, Per1, Satb2, Sox11, Sox4, Tbl1xr1, Wfs1
GO:0006355	BP	e	regulation of transcription, DNA-templated	29/202	1934/32695	1.33e-05	n.a.	29	0.158	0.154	0.158	Arntl, Bcl9l, Cux2, Dmrta2, Fosb, Foxo6, Hdac9, Hes5, Kdm5b, Klf10, Klf5, Map3k9, Mef2c, Meis2, Mn1, Mycn, Nr4a2, Nr4a3, Nrip1, Per1, Rcor2, Satb2, Sox11, Sox4, Tbl1xr1, Tbr1, Tenm1, Tox3, Zcchc12
GO:0048511	BP	e	rhythmic process	7/202	126/32695	1.41e-05	n.a.	7	0.167	0.163	0.167	Arntl, Grin2b, Grin3a, Kdm5b, Klf10, Nrip1, Per1
GO:0006811	BP	e	ion transport	14/202	582/32695	1.76e-05	n.a.	14	0.209	0.203	0.208	Atp2b4, Cacna2d3, Cacnb2, Gabra3, Grik3, Grin2b, Hcn1, Kcne2, Kcnf1, Kcnh7, Scn5a, Slc39a10, Slc4a8, Steap2
GO:0001764	BP	e	neuron migration	7/202	131/32695	1.81e-05	n.a.	7	0.215	0.209	0.215	Adgrl3, Chl1, Dcc, Mef2c, Nr4a2, Reln, Satb2
GO:0007268	BP	e	chemical synaptic transmission	8/202	184/32695	2.04e-05	n.a.	8	0.242	0.236	0.242	Cacnb2, Cartpt, Chrm4, Gabra3, Grin2b, Grm2, Htr4, Penk
GO:0035914	BP	e	skeletal muscle cell differentiation	5/202	54/32695	2.12e-05	n.a.	5	0.252	0.245	0.251	Bcl9l, Dmrta2, Klf5, Mef2c, Sox11
GO:0051966	BP	e	regulation of synaptic transmission, glutamatergic	4/202	27/32695	2.22e-05	n.a.	4	0.264	0.257	0.263	Grm2, Homer1, Mef2c, Nlgn3
GO:0034765	BP	e	regulation of ion transmembrane transport	7/202	136/32695	2.31e-05	n.a.	7	0.274	0.267	0.273	Cacna2d3, Cacnb2, Hcn1, Kcne2, Kcnf1, Kcnh7, Scn5a
GO:0032922	BP	e	circadian regulation of gene expression	5/202	59/32695	3.27e-05	n.a.	5	0.388	0.379	0.388	Arntl, Cartpt, Nrip1, Per1, Prkg2
GO:0006351	BP	e	transcription, DNA-templated	27/202	1841/32695	3.58e-05	n.a.	27	0.425	0.415	0.425	Arntl, Bcl9l, Cux2, Foxo6, Hdac9, Hes5, Kdm5b, Klf10, Klf5, Map3k9, Mef2c, Meis2, Mn1, Nr4a2, Nr4a3, Nrip1, Per1, Rcor2, Satb2, Sox11, Sox4, Tbl1xr1, Tbr1, Tenm1, Tox3, Zcchc12, Zfp184
GO:2000463	BP	e	positive regulation of excitatory postsynaptic potential	4/202	33/32695	5.03e-05	n.a.	4	0.597	0.582	0.596	Cux2, Nlgn3, Reln, Stx1a
GO:0030534	BP	e	adult behavior	4/202	35/32695	6.37e-05	n.a.	4	0.757	0.738	0.755	Cntnap2, Fgfbp3, Nlgn3, Nr4a3
GO:0007623	BP	e	circadian rhythm	5/202	76/32695	0.000111	n.a.	5	1	1	1	Arntl, Klf10, Per1, Prkg2, Prokr2
GO:0098912	BP	e	membrane depolarization during atrial cardiac muscle cell action potential	2/202	3/32695	0.000113	n.a.	2	1	1	1	Cacnb2, Scn5a
GO:2000310	BP	e	regulation of NMDA receptor activity	3/202	16/32695	0.000123	n.a.	3	1	1	1	Mef2c, Nlgn3, Reln
GO:0007216	BP	e	G-protein coupled glutamate receptor signaling pathway	3/202	16/32695	0.000123	n.a.	3	1	1	1	Grik3, Grm2, Homer1
GO:0048712	BP	e	negative regulation of astrocyte differentiation	3/202	17/32695	0.000148	n.a.	3	1	1	1	Hes5, Mycn, Nog
GO:0035019	BP	e	somatic stem cell population maintenance	4/202	45/32695	0.000173	n.a.	4	1	1	1	Bcl9l, Klf10, Nog, Sox4
GO:0021510	BP	e	spinal cord development	3/202	18/32695	0.000177	n.a.	3	1	1	1	Nog, Sox11, Sox4
GO:0071376	BP	e	cellular response to corticotropin-releasing hormone stimulus	2/202	4/32695	0.000226	n.a.	2	1	1	1	Nr4a2, Nr4a3
GO:2001016	BP	e	positive regulation of skeletal muscle cell differentiation	2/202	4/32695	0.000226	n.a.	2	1	1	1	Arntl, Mef2c
GO:0003357	BP	e	noradrenergic neuron differentiation	2/202	4/32695	0.000226	n.a.	2	1	1	1	Sox11, Sox4
GO:0055085	BP	e	transmembrane transport	10/202	410/32695	0.000254	n.a.	10	1	1	1	Abcg4, Aqp1, Hcn1, Kcnf1, Kcnh7, Scn5a, Slc25a30, Slc29a4, Slc35f1, Slc39a10
GO:0010001	BP	e	glial cell differentiation	3/202	21/32695	0.000285	n.a.	3	1	1	1	Dner, Gap43, Reln
GO:0014009	BP	e	glial cell proliferation	2/202	5/32695	0.000375	n.a.	2	1	1	1	Sox11, Sox4
GO:0086045	BP	e	membrane depolarization during AV node cell action potential	2/202	5/32695	0.000375	n.a.	2	1	1	1	Cacnb2, Scn5a
GO:0015015	BP	e	heparan sulfate proteoglycan biosynthetic process, enzymatic modification	2/202	5/32695	0.000375	n.a.	2	1	1	1	Hs6st2, Hs6st3
GO:2000987	BP	e	positive regulation of behavioral fear response	2/202	5/32695	0.000375	n.a.	2	1	1	1	Mef2c, Penk
GO:0003151	BP	e	outflow tract morphogenesis	4/202	55/32695	0.000377	n.a.	4	1	1	1	Mef2c, Nog, Plxnd1, Sox11
GO:0048704	BP	e	embryonic skeletal system morphogenesis	4/202	56/32695	0.000404	n.a.	4	1	1	1	Mef2c, Mycn, Satb2, Sox11
GO:0007611	BP	e	learning or memory	4/202	59/32695	0.000493	n.a.	4	1	1	1	Aff2, Casp3, Grin2b, Mef2c
GO:0007626	BP	e	locomotory behavior	5/202	105/32695	0.000502	n.a.	5	1	1	1	Gpr88, Negr1, Olfm2, Penk, Reln
GO:0031175	BP	e	neuron projection development	6/202	161/32695	0.000514	n.a.	6	1	1	1	Cdh4, Chl1, Cntnap2, L1cam, Nptx2, Tnc
GO:0043524	BP	e	negative regulation of neuron apoptotic process	6/202	163/32695	0.000549	n.a.	6	1	1	1	Chl1, Mef2c, Nr4a2, Nr4a3, Tox3, Wfs1
GO:0071277	BP	e	cellular response to calcium ion	4/202	61/32695	0.00056	n.a.	4	1	1	1	Cpne5, Fosb, Mef2c, Scn5a
GO:0021782	BP	e	glial cell development	2/202	6/32695	0.000561	n.a.	2	1	1	1	Sox11, Sox4
GO:2000323	BP	e	negative regulation of glucocorticoid receptor signaling pathway	2/202	6/32695	0.000561	n.a.	2	1	1	1	Arntl, Per1
GO:0014894	BP	e	response to denervation involved in regulation of muscle adaptation	2/202	6/32695	0.000561	n.a.	2	1	1	1	Actn3, Scn5a
GO:0001649	BP	e	osteoblast differentiation	4/202	65/32695	0.000713	n.a.	4	1	1	1	Actn3, Bmp3, Mef2c, Nog
GO:0048814	BP	e	regulation of dendrite morphogenesis	3/202	29/32695	0.000754	n.a.	3	1	1	1	Hecw1, Lzts1, Tnik
GO:0042634	BP	e	regulation of hair cycle	2/202	7/32695	0.000782	n.a.	2	1	1	1	Arntl, Per1
GO:0021902	BP	e	commitment of neuronal cell to specific neuron type in forebrain	2/202	7/32695	0.000782	n.a.	2	1	1	1	Satb2, Tbr1
GO:0016338	BP	e	calcium-independent cell-cell adhesion via plasma membrane cell-adhesion molecules	2/202	7/32695	0.000782	n.a.	2	1	1	1	Cldn1, Cldn2
GO:0045607	BP	e	regulation of inner ear auditory receptor cell differentiation	2/202	7/32695	0.000782	n.a.	2	1	1	1	Hes5, Mycn
GO:1902305	BP	e	regulation of sodium ion transmembrane transport	2/202	7/32695	0.000782	n.a.	2	1	1	1	Atp2b4, Scn5a
GO:0051928	BP	e	positive regulation of calcium ion transport	3/202	30/32695	0.000834	n.a.	3	1	1	1	Cacnb2, Homer1, Wfs1
GO:0055074	BP	e	calcium ion homeostasis	3/202	31/32695	0.000919	n.a.	3	1	1	1	Kl, Scn5a, Wfs1
GO:0051216	BP	e	cartilage development	4/202	71/32695	0.000995	n.a.	4	1	1	1	Bmp3, Hes5, Nog, Satb2
GO:0051968	BP	e	positive regulation of synaptic transmission, glutamatergic	3/202	32/32695	0.00101	n.a.	3	1	1	1	Cckbr, Nlgn3, Reln
GO:1902667	BP	e	regulation of axon guidance	2/202	8/32695	0.00104	n.a.	2	1	1	1	Tbr1, Zswim6
GO:0097151	BP	e	positive regulation of inhibitory postsynaptic potential	2/202	8/32695	0.00104	n.a.	2	1	1	1	Nlgn3, Ntsr1
GO:0043576	BP	e	regulation of respiratory gaseous exchange	2/202	8/32695	0.00104	n.a.	2	1	1	1	Nr4a2, Ntsr1
GO:0006357	BP	e	regulation of transcription by RNA polymerase II	10/202	492/32695	0.00104	n.a.	10	1	1	1	Atp2b4, Brwd3, Fosb, Foxo6, Klf10, Klf5, Nrip1, Rcor2, Satb2, Tbl1xr1
GO:0086091	BP	e	regulation of heart rate by cardiac conduction	3/202	33/32695	0.00111	n.a.	3	1	1	1	Cacnb2, Kcne2, Scn5a
GO:0048812	BP	e	neuron projection morphogenesis	4/202	76/32695	0.00128	n.a.	4	1	1	1	Cntnap2, Myo16, Tnik, Zswim6
GO:0010035	BP	e	response to inorganic substance	2/202	9/32695	0.00133	n.a.	2	1	1	1	Nr4a2, Pgam2
GO:2000969	BP	e	positive regulation of AMPA receptor activity	2/202	9/32695	0.00133	n.a.	2	1	1	1	Nlgn3, Reln
GO:0042421	BP	e	norepinephrine biosynthetic process	2/202	9/32695	0.00133	n.a.	2	1	1	1	Kl, Moxd1
GO:0006813	BP	e	potassium ion transport	5/202	131/32695	0.00136	n.a.	5	1	1	1	Aqp1, Hcn1, Kcne2, Kcnf1, Kcnh7
GO:0072659	BP	e	protein localization to plasma membrane	5/202	133/32695	0.00145	n.a.	5	1	1	1	Cacnb2, Dpp10, Prkg2, Rab3b, Tnik
GO:0009306	BP	e	protein secretion	3/202	37/32695	0.00155	n.a.	3	1	1	1	Cbln4, Olfm2, Rab3b
GO:0016339	BP	e	calcium-dependent cell-cell adhesion via plasma membrane cell adhesion molecules	3/202	37/32695	0.00155	n.a.	3	1	1	1	Cdh13, Cdh4, Pcdh18
GO:0060079	BP	e	excitatory postsynaptic potential	3/202	37/32695	0.00155	n.a.	3	1	1	1	Grin2b, Mef2c, Nlgn3
GO:0008306	BP	e	associative learning	3/202	37/32695	0.00155	n.a.	3	1	1	1	Grin2b, Nptx2, Reln
GO:0045893	BP	e	positive regulation of transcription, DNA-templated	11/202	613/32695	0.0016	n.a.	11	1	1	1	Arntl, Hes5, Klf5, Mef2c, Mycn, Nr4a2, Nr4a3, Sox11, Sox4, Tbl1xr1, Tox3
GO:0030182	BP	e	neuron differentiation	5/202	136/32695	0.0016	n.a.	5	1	1	1	Casp3, Mef2c, Nr4a2, Sox11, Tbr1
GO:0051764	BP	e	actin crosslink formation	2/202	10/32695	0.00165	n.a.	2	1	1	1	Dpysl3, Marcks
GO:0061626	BP	e	pharyngeal arch artery morphogenesis	2/202	10/32695	0.00165	n.a.	2	1	1	1	Folr1, Nog
GO:0003254	BP	e	regulation of membrane depolarization	2/202	10/32695	0.00165	n.a.	2	1	1	1	Hcn1, Ntsr1
GO:0060563	BP	e	neuroepithelial cell differentiation	2/202	10/32695	0.00165	n.a.	2	1	1	1	Sox11, Sox4
GO:0032940	BP	e	secretion by cell	2/202	10/32695	0.00165	n.a.	2	1	1	1	Aqp1, Stx1a
GO:0045786	BP	e	negative regulation of cell cycle	3/202	39/32695	0.0018	n.a.	3	1	1	1	Brinp2, Casp3, Rps6ka2
GO:0006816	BP	e	calcium ion transport	5/202	140/32695	0.00182	n.a.	5	1	1	1	Atp2b4, Cacna2d3, Cacnb2, Grin2b, Grin3a
GO:0014049	BP	e	positive regulation of glutamate secretion	2/202	11/32695	0.00201	n.a.	2	1	1	1	Grin2b, Ntsr1
GO:0060174	BP	e	limb bud formation	2/202	11/32695	0.00201	n.a.	2	1	1	1	Sox11, Sox4
GO:0030154	BP	e	cell differentiation	14/202	932/32695	0.00208	n.a.	14	1	1	1	Bmp3, Chl1, Cpne5, Dner, Epha6, Gap43, Hes5, L1cam, Lmtk2, Mef2c, Nog, Sox11, Sox4, Tenm3
GO:0060412	BP	e	ventricular septum morphogenesis	3/202	42/32695	0.00223	n.a.	3	1	1	1	Nog, Sox11, Sox4
GO:0071310	BP	e	cellular response to organic substance	3/202	42/32695	0.00223	n.a.	3	1	1	1	Casp3, Cux2, Satb2
GO:0001662	BP	e	behavioral fear response	3/202	43/32695	0.00239	n.a.	3	1	1	1	Grin2b, Lypd1, Penk
GO:0070932	BP	e	histone H3 deacetylation	2/202	12/32695	0.00241	n.a.	2	1	1	1	Hdac9, Per1
GO:0071625	BP	e	vocalization behavior	2/202	12/32695	0.00241	n.a.	2	1	1	1	Cntnap2, Nlgn3
GO:0006508	BP	e	proteolysis	10/202	553/32695	0.00245	n.a.	10	1	1	1	Casp3, Dpp10, Ecel1, Ide, Lnpep, Pgpep1, Prss12, Reln, Usp29, Usp43
GO:0010976	BP	e	positive regulation of neuron projection development	5/202	150/32695	0.00246	n.a.	5	1	1	1	Dcc, Dpysl3, Negr1, Reln, Tenm3
GO:0071300	BP	e	cellular response to retinoic acid	3/202	45/32695	0.00272	n.a.	3	1	1	1	Aqp1, Brinp2, Mef2c
GO:0007416	BP	e	synapse assembly	3/202	45/32695	0.00272	n.a.	3	1	1	1	Adgrl3, Nlgn3, Plxnd1
GO:0086005	BP	e	ventricular cardiac muscle cell action potential	2/202	13/32695	0.00283	n.a.	2	1	1	1	Kcne2, Scn5a
GO:0086002	BP	e	cardiac muscle cell action potential involved in contraction	2/202	13/32695	0.00283	n.a.	2	1	1	1	Kcne2, Scn5a
GO:2001259	BP	e	positive regulation of cation channel activity	2/202	13/32695	0.00283	n.a.	2	1	1	1	Hcn1, Ntsr1
GO:0030033	BP	e	microvillus assembly	2/202	13/32695	0.00283	n.a.	2	1	1	1	Klf5, Tnik
GO:0007162	BP	e	negative regulation of cell adhesion	3/202	47/32695	0.00308	n.a.	3	1	1	1	Cdh13, Plxnd1, Tnc
GO:0007420	BP	e	brain development	5/202	160/32695	0.00325	n.a.	5	1	1	1	Adgrl3, Hes5, Nog, Pcdh18, Reln
GO:0070885	BP	e	negative regulation of calcineurin-NFAT signaling cascade	2/202	14/32695	0.00329	n.a.	2	1	1	1	Actn3, Atp2b4
GO:0060307	BP	e	regulation of ventricular cardiac muscle cell membrane repolarization	2/202	14/32695	0.00329	n.a.	2	1	1	1	Kcne2, Scn5a
GO:0035235	BP	e	ionotropic glutamate receptor signaling pathway	2/202	14/32695	0.00329	n.a.	2	1	1	1	Grin2b, Grin3a
GO:0042752	BP	e	regulation of circadian rhythm	3/202	49/32695	0.00347	n.a.	3	1	1	1	Kdm5b, Klf10, Per1
GO:0048167	BP	e	regulation of synaptic plasticity	3/202	49/32695	0.00347	n.a.	3	1	1	1	Grin2b, Lzts1, Mef2c
GO:0071805	BP	e	potassium ion transmembrane transport	4/202	101/32695	0.00362	n.a.	4	1	1	1	Hcn1, Kcne2, Kcnf1, Kcnh7
GO:0010468	BP	e	regulation of gene expression	7/202	316/32695	0.00365	n.a.	7	1	1	1	Aff2, Nr4a2, Peg3, Reln, Satb2, Tbl1xr1, Tbr1
GO:0043171	BP	e	peptide catabolic process	2/202	15/32695	0.00378	n.a.	2	1	1	1	Ide, Lnpep
GO:0043069	BP	e	negative regulation of programmed cell death	2/202	15/32695	0.00378	n.a.	2	1	1	1	Tmem132a, Wfs1
GO:0048678	BP	e	response to axon injury	2/202	15/32695	0.00378	n.a.	2	1	1	1	Dpysl3, Folr1
GO:0048011	BP	e	neurotrophin TRK receptor signaling pathway	2/202	15/32695	0.00378	n.a.	2	1	1	1	Casp3, Lmtk2
GO:0030514	BP	e	negative regulation of BMP signaling pathway	3/202	51/32695	0.00389	n.a.	3	1	1	1	Nog, Sostdc1, Vwc2l
GO:0061053	BP	e	somite development	2/202	16/32695	0.00431	n.a.	2	1	1	1	Nog, Sox11
GO:0003085	BP	e	negative regulation of systemic arterial blood pressure	2/202	16/32695	0.00431	n.a.	2	1	1	1	Kl, Ntsr1
GO:0043065	BP	e	positive regulation of apoptotic process	7/202	329/32695	0.00454	n.a.	7	1	1	1	Casp3, Hrk, Map3k9, Ntsr1, Rps6ka2, Sox4, Zmat3
GO:0045666	BP	e	positive regulation of neuron differentiation	4/202	108/32695	0.0046	n.a.	4	1	1	1	Brinp2, Mef2c, Sox11, Vwc2l
GO:0001501	BP	e	skeletal system development	4/202	109/32695	0.00475	n.a.	4	1	1	1	Ncan, Nog, Sox11, Sox4
GO:0048485	BP	e	sympathetic nervous system development	2/202	17/32695	0.00486	n.a.	2	1	1	1	Sox11, Sox4
GO:0035418	BP	e	protein localization to synapse	2/202	17/32695	0.00486	n.a.	2	1	1	1	Homer1, Reln
GO:0060078	BP	e	regulation of postsynaptic membrane potential	2/202	17/32695	0.00486	n.a.	2	1	1	1	Gabra3, Grin2b
GO:0050804	BP	e	modulation of chemical synaptic transmission	3/202	56/32695	0.00506	n.a.	3	1	1	1	Grik3, Nlgn3, Reln
GO:0001841	BP	e	neural tube formation	2/202	18/32695	0.00544	n.a.	2	1	1	1	Sox11, Sox4
GO:1901379	BP	e	regulation of potassium ion transmembrane transport	2/202	18/32695	0.00544	n.a.	2	1	1	1	Dpp10, Kcne2
GO:0007187	BP	e	G-protein coupled receptor signaling pathway, coupled to cyclic nucleotide second messenger	3/202	58/32695	0.00559	n.a.	3	1	1	1	Chrm4, Htr4, Sstr4
GO:0045892	BP	e	negative regulation of transcription, DNA-templated	9/202	529/32695	0.00588	n.a.	9	1	1	1	Arntl, Cux2, Hdac9, Hes5, Kdm5b, Klf10, Per1, Rcor2, Tbl1xr1
GO:2000108	BP	e	positive regulation of leukocyte apoptotic process	1/202	1/32695	0.00618	n.a.	1	1	1	1	Nr4a3
GO:2000313	BP	e	regulation of fibroblast growth factor receptor signaling pathway involved in neural plate anterior/posterior pattern formation	1/202	1/32695	0.00618	n.a.	1	1	1	1	Nog
GO:1902078	BP	e	positive regulation of lateral motor column neuron migration	1/202	1/32695	0.00618	n.a.	1	1	1	1	Reln
GO:1900082	BP	e	negative regulation of arginine catabolic process	1/202	1/32695	0.00618	n.a.	1	1	1	1	Atp2b4
GO:2001226	BP	e	negative regulation of chloride transport	1/202	1/32695	0.00618	n.a.	1	1	1	1	Prkg2
GO:0090193	BP	e	positive regulation of glomerulus development	1/202	1/32695	0.00618	n.a.	1	1	1	1	Nog
GO:1903249	BP	e	negative regulation of citrulline biosynthetic process	1/202	1/32695	0.00618	n.a.	1	1	1	1	Atp2b4
GO:2000723	BP	e	negative regulation of cardiac vascular smooth muscle cell differentiation	1/202	1/32695	0.00618	n.a.	1	1	1	1	Klf5
GO:0038097	BP	e	positive regulation of mast cell activation by Fc-epsilon receptor signaling pathway	1/202	1/32695	0.00618	n.a.	1	1	1	1	Nr4a3
GO:0061772	BP	e	drug transport across blood-nerve barrier	1/202	1/32695	0.00618	n.a.	1	1	1	1	Cldn1
GO:0060648	BP	e	mammary gland bud morphogenesis	1/202	1/32695	0.00618	n.a.	1	1	1	1	Sostdc1
GO:0072230	BP	e	metanephric proximal straight tubule development	1/202	1/32695	0.00618	n.a.	1	1	1	1	Aqp1
GO:0072232	BP	e	metanephric proximal convoluted tubule segment 2 development	1/202	1/32695	0.00618	n.a.	1	1	1	1	Aqp1
GO:0008627	BP	e	intrinsic apoptotic signaling pathway in response to osmotic stress	1/202	1/32695	0.00618	n.a.	1	1	1	1	Casp3
GO:0003138	BP	e	primary heart field specification	1/202	1/32695	0.00618	n.a.	1	1	1	1	Mef2c
GO:1902159	BP	e	regulation of cyclic nucleotide-gated ion channel activity	1/202	1/32695	0.00618	n.a.	1	1	1	1	Kcne2
GO:0031646	BP	e	positive regulation of neurological system process	1/202	1/32695	0.00618	n.a.	1	1	1	1	Fgfbp3
GO:2000761	BP	e	positive regulation of N-terminal peptidyl-lysine acetylation	1/202	1/32695	0.00618	n.a.	1	1	1	1	Sox4
GO:0061713	BP	e	anterior neural tube closure	1/202	1/32695	0.00618	n.a.	1	1	1	1	Folr1
GO:1901979	BP	e	regulation of inward rectifier potassium channel activity	1/202	1/32695	0.00618	n.a.	1	1	1	1	Kcne2
GO:0002209	BP	e	behavioral defense response	1/202	1/32695	0.00618	n.a.	1	1	1	1	Cckbr
GO:0099156	BP	e	cell-cell signaling via exosome	1/202	1/32695	0.00618	n.a.	1	1	1	1	Klf5
GO:0035378	BP	e	carbon dioxide transmembrane transport	1/202	1/32695	0.00618	n.a.	1	1	1	1	Aqp1
GO:0051866	BP	e	general adaptation syndrome	1/202	1/32695	0.00618	n.a.	1	1	1	1	Nr4a2
GO:0098736	BP	e	negative regulation of the force of heart contraction	1/202	1/32695	0.00618	n.a.	1	1	1	1	Atp2b4
GO:0021511	BP	e	spinal cord patterning	1/202	1/32695	0.00618	n.a.	1	1	1	1	Reln
GO:0003185	BP	e	sinoatrial valve morphogenesis	1/202	1/32695	0.00618	n.a.	1	1	1	1	Mef2c
GO:2000864	BP	e	regulation of estradiol secretion	1/202	1/32695	0.00618	n.a.	1	1	1	1	Kdm5b
GO:0090257	BP	e	regulation of muscle system process	1/202	1/32695	0.00618	n.a.	1	1	1	1	Actn3
GO:1905929	BP	e	positive regulation of invadopodium disassembly	1/202	1/32695	0.00618	n.a.	1	1	1	1	Nav3
GO:0010092	BP	e	specification of animal organ identity	1/202	1/32695	0.00618	n.a.	1	1	1	1	Tbr1
GO:0003147	BP	e	neural crest cell migration involved in heart formation	1/202	1/32695	0.00618	n.a.	1	1	1	1	Folr1
GO:1904025	BP	e	positive regulation of glucose catabolic process to lactate via pyruvate	1/202	1/32695	0.00618	n.a.	1	1	1	1	Actn3
GO:0017085	BP	e	response to insecticide	1/202	1/32695	0.00618	n.a.	1	1	1	1	Nr4a2
GO:0072220	BP	e	metanephric descending thin limb development	1/202	1/32695	0.00618	n.a.	1	1	1	1	Aqp1
GO:0060825	BP	e	fibroblast growth factor receptor signaling pathway involved in neural plate anterior/posterior pattern formation	1/202	1/32695	0.00618	n.a.	1	1	1	1	Nog
GO:1903615	BP	e	positive regulation of protein tyrosine phosphatase activity	1/202	1/32695	0.00618	n.a.	1	1	1	1	Slc39a10
GO:1903385	BP	e	regulation of homophilic cell adhesion	1/202	1/32695	0.00618	n.a.	1	1	1	1	Tenm3
GO:1905174	BP	e	regulation of vascular smooth muscle cell dedifferentiation	1/202	1/32695	0.00618	n.a.	1	1	1	1	Olfm2
GO:0071545	BP	e	inositol phosphate catabolic process	1/202	1/32695	0.00618	n.a.	1	1	1	1	Ntsr1
GO:0085018	BP	e	maintenance of symbiont-containing vacuole by host	1/202	1/32695	0.00618	n.a.	1	1	1	1	Aqp1
GO:0060739	BP	e	mesenchymal-epithelial cell signaling involved in prostate gland development	1/202	1/32695	0.00618	n.a.	1	1	1	1	Tnc
GO:0009444	BP	e	pyruvate oxidation	1/202	1/32695	0.00618	n.a.	1	1	1	1	Nr4a3
GO:0008542	BP	e	visual learning	3/202	64/32695	0.00734	n.a.	3	1	1	1	Meis2, Nlgn3, Nog
GO:0010628	BP	e	positive regulation of gene expression	8/202	453/32695	0.00744	n.a.	8	1	1	1	Cux2, Kdm5b, Mef2c, Mycn, Nog, Rps6ka2, Sox11, Tnc
GO:0042391	BP	e	regulation of membrane potential	4/202	124/32695	0.00746	n.a.	4	1	1	1	Gabra3, Grik3, Hcn1, Kcnh7
GO:0048666	BP	e	neuron development	3/202	66/32695	0.00799	n.a.	3	1	1	1	Mef2c, Tenm1, Tenm3
GO:0008344	BP	e	adult locomotory behavior	3/202	66/32695	0.00799	n.a.	3	1	1	1	Chl1, Nr4a2, Ntsr1
GO:0001964	BP	e	startle response	2/202	22/32695	0.00809	n.a.	2	1	1	1	Grin2b, Penk
GO:0050850	BP	e	positive regulation of calcium-mediated signaling	2/202	22/32695	0.00809	n.a.	2	1	1	1	Cdh13, L1cam
GO:0006915	BP	e	apoptotic process	9/202	559/32695	0.00829	n.a.	9	1	1	1	Casp3, Cckbr, Dcc, Hrk, Map3k9, Mef2c, Peg3, Tox3, Zmat3
GO:2000311	BP	e	regulation of AMPA receptor activity	2/202	23/32695	0.00882	n.a.	2	1	1	1	Mef2c, Nlgn3
GO:0009880	BP	e	embryonic pattern specification	2/202	23/32695	0.00882	n.a.	2	1	1	1	Pgap1, Satb2
GO:0042593	BP	e	glucose homeostasis	4/202	131/32695	0.00901	n.a.	4	1	1	1	Foxo6, Ppp1r3g, Sox4, Wfs1
GO:1900273	BP	e	positive regulation of long-term synaptic potentiation	2/202	24/32695	0.00959	n.a.	2	1	1	1	Grin2b, Reln
GO:0044331	BP	e	cell-cell adhesion mediated by cadherin	2/202	24/32695	0.00959	n.a.	2	1	1	1	Cdh13, Cdh4
GO:0060425	BP	e	lung morphogenesis	2/202	24/32695	0.00959	n.a.	2	1	1	1	Nog, Sox11
GO:0061003	BP	e	positive regulation of dendritic spine morphogenesis	2/202	24/32695	0.00959	n.a.	2	1	1	1	Cux2, Reln
GO:0048593	BP	e	camera-type eye morphogenesis	2/202	24/32695	0.00959	n.a.	2	1	1	1	Aqp1, Tenm3
GO:0010613	BP	e	positive regulation of cardiac muscle hypertrophy	2/202	25/32695	0.0104	n.a.	2	1	1	1	Mef2c, Nr4a3
GO:0007214	BP	e	gamma-aminobutyric acid signaling pathway	2/202	25/32695	0.0104	n.a.	2	1	1	1	Gabra3, Htr4
GO:0007189	BP	e	adenylate cyclase-activating G-protein coupled receptor signaling pathway	3/202	73/32695	0.0105	n.a.	3	1	1	1	Gpr161, Gpr26, Htr4
GO:0051965	BP	e	positive regulation of synapse assembly	3/202	73/32695	0.0105	n.a.	3	1	1	1	Adgrl3, Cux2, Nlgn3
GO:0043542	BP	e	endothelial cell migration	2/202	26/32695	0.0112	n.a.	2	1	1	1	Cdh13, Plxnd1
GO:0048741	BP	e	skeletal muscle fiber development	2/202	26/32695	0.0112	n.a.	2	1	1	1	Dner, Homer1
GO:0050679	BP	e	positive regulation of epithelial cell proliferation	3/202	75/32695	0.0113	n.a.	3	1	1	1	Nog, Nr4a3, Scn5a
GO:0016198	BP	e	axon choice point recognition	1/202	2/32695	0.0123	n.a.	1	1	1	1	Gap43
GO:0021781	BP	e	glial cell fate commitment	1/202	2/32695	0.0123	n.a.	1	1	1	1	Hes5
GO:0014728	BP	e	regulation of the force of skeletal muscle contraction	1/202	2/32695	0.0123	n.a.	1	1	1	1	Actn3
GO:0060302	BP	e	negative regulation of cytokine activity	1/202	2/32695	0.0123	n.a.	1	1	1	1	Nog
GO:0099566	BP	e	regulation of postsynaptic cytosolic calcium ion concentration	1/202	2/32695	0.0123	n.a.	1	1	1	1	Grin2b
GO:0015798	BP	e	myo-inositol transport	1/202	2/32695	0.0123	n.a.	1	1	1	1	Pgap1
GO:0030185	BP	e	nitric oxide transport	1/202	2/32695	0.0123	n.a.	1	1	1	1	Aqp1
GO:0072239	BP	e	metanephric glomerulus vasculature development	1/202	2/32695	0.0123	n.a.	1	1	1	1	Aqp1
GO:0034349	BP	e	glial cell apoptotic process	1/202	2/32695	0.0123	n.a.	1	1	1	1	Casp3
GO:0003097	BP	e	renal water transport	1/202	2/32695	0.0123	n.a.	1	1	1	1	Aqp1
GO:0008038	BP	e	neuron recognition	1/202	2/32695	0.0123	n.a.	1	1	1	1	Cntnap2
GO:1902806	BP	e	regulation of cell cycle G1/S phase transition	1/202	2/32695	0.0123	n.a.	1	1	1	1	Atp2b4
GO:0007521	BP	e	muscle cell fate determination	1/202	2/32695	0.0123	n.a.	1	1	1	1	Mef2c
GO:0048875	BP	e	chemical homeostasis within a tissue	1/202	2/32695	0.0123	n.a.	1	1	1	1	Homer1
GO:0035332	BP	e	positive regulation of hippo signaling	1/202	2/32695	0.0123	n.a.	1	1	1	1	Sox11
GO:0009629	BP	e	response to gravity	1/202	2/32695	0.0123	n.a.	1	1	1	1	Stx1a
GO:0072160	BP	e	nephron tubule epithelial cell differentiation	1/202	2/32695	0.0123	n.a.	1	1	1	1	Mef2c
GO:1900159	BP	e	positive regulation of bone mineralization involved in bone maturation	1/202	2/32695	0.0123	n.a.	1	1	1	1	Actn3
GO:0038188	BP	e	cholecystokinin signaling pathway	1/202	2/32695	0.0123	n.a.	1	1	1	1	Cckbr
GO:1901143	BP	e	insulin catabolic process	1/202	2/32695	0.0123	n.a.	1	1	1	1	Ide
GO:0035377	BP	e	transepithelial water transport	1/202	2/32695	0.0123	n.a.	1	1	1	1	Aqp1
GO:1905006	BP	e	negative regulation of epithelial to mesenchymal transition involved in endocardial cushion formation	1/202	2/32695	0.0123	n.a.	1	1	1	1	Nog
GO:2000327	BP	e	positive regulation of ligand-dependent nuclear receptor transcription coactivator activity	1/202	2/32695	0.0123	n.a.	1	1	1	1	Zcchc12
GO:0014732	BP	e	skeletal muscle atrophy	1/202	2/32695	0.0123	n.a.	1	1	1	1	Actn3
GO:0086043	BP	e	bundle of His cell action potential	1/202	2/32695	0.0123	n.a.	1	1	1	1	Scn5a
GO:0032812	BP	e	positive regulation of epinephrine secretion	1/202	2/32695	0.0123	n.a.	1	1	1	1	Cartpt
GO:0032765	BP	e	positive regulation of mast cell cytokine production	1/202	2/32695	0.0123	n.a.	1	1	1	1	Nr4a3
GO:0071231	BP	e	cellular response to folic acid	1/202	2/32695	0.0123	n.a.	1	1	1	1	Folr1
GO:1903892	BP	e	negative regulation of ATF6-mediated unfolded protein response	1/202	2/32695	0.0123	n.a.	1	1	1	1	Wfs1
GO:0051458	BP	e	corticotropin secretion	1/202	2/32695	0.0123	n.a.	1	1	1	1	Aqp1
GO:2000981	BP	e	negative regulation of inner ear receptor cell differentiation	1/202	2/32695	0.0123	n.a.	1	1	1	1	Hes5
GO:2001111	BP	e	positive regulation of lens epithelial cell proliferation	1/202	2/32695	0.0123	n.a.	1	1	1	1	Sox11
GO:0051599	BP	e	response to hydrostatic pressure	1/202	2/32695	0.0123	n.a.	1	1	1	1	Atp2b4
GO:0021761	BP	e	limbic system development	1/202	2/32695	0.0123	n.a.	1	1	1	1	Cntnap2
GO:1904879	BP	e	positive regulation of calcium ion transmembrane transport via high voltage-gated calcium channel	1/202	2/32695	0.0123	n.a.	1	1	1	1	Cacnb2
GO:0061386	BP	e	closure of optic fissure	1/202	2/32695	0.0123	n.a.	1	1	1	1	Sox11
GO:0044241	BP	e	lipid digestion	1/202	2/32695	0.0123	n.a.	1	1	1	1	Aqp1
GO:0070253	BP	e	somatostatin secretion	1/202	2/32695	0.0123	n.a.	1	1	1	1	Cartpt
GO:0048661	BP	e	positive regulation of smooth muscle cell proliferation	3/202	78/32695	0.0126	n.a.	3	1	1	1	Cdh13, Hes5, Nr4a3
GO:0045165	BP	e	cell fate commitment	3/202	78/32695	0.0126	n.a.	3	1	1	1	Casp3, Gap43, Mef2c
GO:0001782	BP	e	B cell homeostasis	2/202	28/32695	0.0129	n.a.	2	1	1	1	Casp3, Mef2c
GO:0071542	BP	e	dopaminergic neuron differentiation	2/202	28/32695	0.0129	n.a.	2	1	1	1	Dmrta2, Nr4a2
GO:0051260	BP	e	protein homooligomerization	5/202	227/32695	0.0137	n.a.	5	1	1	1	Cldn1, Dpysl3, Ide, Kcnf1, Marcks
GO:0017157	BP	e	regulation of exocytosis	2/202	29/32695	0.0138	n.a.	2	1	1	1	Rab3b, Stx1a
GO:0034332	BP	e	adherens junction organization	2/202	29/32695	0.0138	n.a.	2	1	1	1	Cdh13, Cdh4
GO:2001234	BP	e	negative regulation of apoptotic signaling pathway	2/202	30/32695	0.0147	n.a.	2	1	1	1	Nog, Nr4a2
GO:0048675	BP	e	axon extension	2/202	30/32695	0.0147	n.a.	2	1	1	1	Nlgn3, Raph1
GO:0019228	BP	e	neuronal action potential	2/202	31/32695	0.0157	n.a.	2	1	1	1	Gpr88, Scn5a
GO:0000165	BP	e	MAPK cascade	3/202	86/32695	0.0163	n.a.	3	1	1	1	Map3k9, Mef2c, Tnik
GO:0050806	BP	e	positive regulation of synaptic transmission	2/202	32/32695	0.0167	n.a.	2	1	1	1	Cckbr, Grin2b
GO:0007417	BP	e	central nervous system development	3/202	89/32695	0.0179	n.a.	3	1	1	1	Ncan, Nog, Reln
GO:0010751	BP	e	negative regulation of nitric oxide mediated signal transduction	1/202	3/32695	0.0184	n.a.	1	1	1	1	Atp2b4
GO:0018125	BP	e	peptidyl-cysteine methylation	1/202	3/32695	0.0184	n.a.	1	1	1	1	Rab3b
GO:0097477	BP	e	lateral motor column neuron migration	1/202	3/32695	0.0184	n.a.	1	1	1	1	Reln
GO:1901078	BP	e	negative regulation of relaxation of muscle	1/202	3/32695	0.0184	n.a.	1	1	1	1	Actn3
GO:1900625	BP	e	positive regulation of monocyte aggregation	1/202	3/32695	0.0184	n.a.	1	1	1	1	Nr4a3
GO:2000978	BP	e	negative regulation of forebrain neuron differentiation	1/202	3/32695	0.0184	n.a.	1	1	1	1	Hes5
GO:2000974	BP	e	negative regulation of pro-B cell differentiation	1/202	3/32695	0.0184	n.a.	1	1	1	1	Hes5
GO:0098900	BP	e	regulation of action potential	1/202	3/32695	0.0184	n.a.	1	1	1	1	Ntsr1
GO:0071472	BP	e	cellular response to salt stress	1/202	3/32695	0.0184	n.a.	1	1	1	1	Aqp1
GO:0021986	BP	e	habenula development	1/202	3/32695	0.0184	n.a.	1	1	1	1	Nr4a2
GO:2000016	BP	e	negative regulation of determination of dorsal identity	1/202	3/32695	0.0184	n.a.	1	1	1	1	Sostdc1
GO:0060025	BP	e	regulation of synaptic activity	1/202	3/32695	0.0184	n.a.	1	1	1	1	Mef2c
GO:0035194	BP	e	posttranscriptional gene silencing by RNA	1/202	3/32695	0.0184	n.a.	1	1	1	1	Helz
GO:2000074	BP	e	regulation of type B pancreatic cell development	1/202	3/32695	0.0184	n.a.	1	1	1	1	Arntl
GO:0045163	BP	e	clustering of voltage-gated potassium channels	1/202	3/32695	0.0184	n.a.	1	1	1	1	Cntnap2
GO:0055096	BP	e	low-density lipoprotein particle mediated signaling	1/202	3/32695	0.0184	n.a.	1	1	1	1	Cdh13
GO:0071288	BP	e	cellular response to mercury ion	1/202	3/32695	0.0184	n.a.	1	1	1	1	Aqp1
GO:0110024	BP	e	positive regulation of cardiac muscle myoblast proliferation	1/202	3/32695	0.0184	n.a.	1	1	1	1	Meis2
GO:0051586	BP	e	positive regulation of dopamine uptake involved in synaptic transmission	1/202	3/32695	0.0184	n.a.	1	1	1	1	Rab3b
GO:0042984	BP	e	regulation of amyloid precursor protein biosynthetic process	1/202	3/32695	0.0184	n.a.	1	1	1	1	Necab1
GO:0021965	BP	e	spinal cord ventral commissure morphogenesis	1/202	3/32695	0.0184	n.a.	1	1	1	1	Dcc
GO:2000111	BP	e	positive regulation of macrophage apoptotic process	1/202	3/32695	0.0184	n.a.	1	1	1	1	Mef2c
GO:0015729	BP	e	oxaloacetate transport	1/202	3/32695	0.0184	n.a.	1	1	1	1	Slc25a30
GO:0006589	BP	e	octopamine biosynthetic process	1/202	3/32695	0.0184	n.a.	1	1	1	1	Moxd1
GO:0015709	BP	e	thiosulfate transport	1/202	3/32695	0.0184	n.a.	1	1	1	1	Slc25a30
GO:0086067	BP	e	AV node cell to bundle of His cell communication	1/202	3/32695	0.0184	n.a.	1	1	1	1	Scn5a
GO:0071423	BP	e	malate transmembrane transport	1/202	3/32695	0.0184	n.a.	1	1	1	1	Slc25a30
GO:0086047	BP	e	membrane depolarization during Purkinje myocyte cell action potential	1/202	3/32695	0.0184	n.a.	1	1	1	1	Scn5a
GO:0086048	BP	e	membrane depolarization during bundle of His cell action potential	1/202	3/32695	0.0184	n.a.	1	1	1	1	Scn5a
GO:1902630	BP	e	regulation of membrane hyperpolarization	1/202	3/32695	0.0184	n.a.	1	1	1	1	Hcn1
GO:2001257	BP	e	regulation of cation channel activity	1/202	3/32695	0.0184	n.a.	1	1	1	1	Homer1
GO:0051153	BP	e	regulation of striated muscle cell differentiation	1/202	3/32695	0.0184	n.a.	1	1	1	1	Hdac9
GO:0006505	BP	e	GPI anchor metabolic process	1/202	3/32695	0.0184	n.a.	1	1	1	1	Pgap1
GO:0010992	BP	e	ubiquitin recycling	1/202	3/32695	0.0184	n.a.	1	1	1	1	Ide
GO:0042668	BP	e	auditory receptor cell fate determination	1/202	3/32695	0.0184	n.a.	1	1	1	1	Hes5
GO:0014012	BP	e	peripheral nervous system axon regeneration	1/202	3/32695	0.0184	n.a.	1	1	1	1	Tnc
GO:0010573	BP	e	vascular endothelial growth factor production	1/202	3/32695	0.0184	n.a.	1	1	1	1	Adamts3
GO:0046960	BP	e	sensitization	1/202	3/32695	0.0184	n.a.	1	1	1	1	Grin2b
GO:0070673	BP	e	response to interleukin-18	1/202	3/32695	0.0184	n.a.	1	1	1	1	Cldn1
GO:0140199	BP	e	negative regulation of adenylate cyclase-activating adrenergic receptor signaling pathway involved in heart process	1/202	3/32695	0.0184	n.a.	1	1	1	1	Atp2b4
GO:0071422	BP	e	succinate transmembrane transport	1/202	3/32695	0.0184	n.a.	1	1	1	1	Slc25a30
GO:0072282	BP	e	metanephric nephron tubule morphogenesis	1/202	3/32695	0.0184	n.a.	1	1	1	1	Hes5
GO:0033631	BP	e	cell-cell adhesion mediated by integrin	1/202	3/32695	0.0184	n.a.	1	1	1	1	L1cam
GO:0035063	BP	e	nuclear speck organization	1/202	3/32695	0.0184	n.a.	1	1	1	1	Aff2
GO:0001543	BP	e	ovarian follicle rupture	1/202	3/32695	0.0184	n.a.	1	1	1	1	Nrip1
GO:0072734	BP	e	cellular response to staurosporine	1/202	3/32695	0.0184	n.a.	1	1	1	1	Casp3
GO:0031448	BP	e	positive regulation of fast-twitch skeletal muscle fiber contraction	1/202	3/32695	0.0184	n.a.	1	1	1	1	Actn3
GO:1903348	BP	e	positive regulation of bicellular tight junction assembly	1/202	3/32695	0.0184	n.a.	1	1	1	1	Cldn1
GO:0042447	BP	e	hormone catabolic process	1/202	3/32695	0.0184	n.a.	1	1	1	1	Ide
GO:0070588	BP	e	calcium ion transmembrane transport	3/202	90/32695	0.0184	n.a.	3	1	1	1	Atp2b4, Cacna2d3, Cacnb2
GO:0008284	BP	e	positive regulation of cell proliferation	8/202	535/32695	0.0187	n.a.	8	1	1	1	Cckbr, Hes5, Marcksl1, Mycn, Nog, Sox11, Sox4, Tnc
GO:0090263	BP	e	positive regulation of canonical Wnt signaling pathway	3/202	92/32695	0.0195	n.a.	3	1	1	1	Arntl, Sox4, Tbl1xr1
GO:0016575	BP	e	histone deacetylation	2/202	35/32695	0.0198	n.a.	2	1	1	1	Hdac9, Tbl1xr1
GO:0010975	BP	e	regulation of neuron projection development	2/202	35/32695	0.0198	n.a.	2	1	1	1	Dpysl3, Tbr1
GO:0050796	BP	e	regulation of insulin secretion	2/202	35/32695	0.0198	n.a.	2	1	1	1	Arntl, Cartpt
GO:0030501	BP	e	positive regulation of bone mineralization	2/202	35/32695	0.0198	n.a.	2	1	1	1	Kl, Mef2c
GO:0007507	BP	e	heart development	5/202	250/32695	0.0199	n.a.	5	1	1	1	Casp3, Hdac9, Mef2c, Rps6ka2, Sox4
GO:0007613	BP	e	memory	3/202	93/32695	0.0201	n.a.	3	1	1	1	Foxo6, Grin2b, Nog
GO:0051291	BP	e	protein heterooligomerization	3/202	94/32695	0.0207	n.a.	3	1	1	1	Cldn1, Ide, Kcnh7
GO:0071320	BP	e	cellular response to cAMP	2/202	36/32695	0.0208	n.a.	2	1	1	1	Aqp1, Hcn1
GO:0007043	BP	e	cell-cell junction assembly	2/202	36/32695	0.0208	n.a.	2	1	1	1	Cdh13, Cdh4
GO:0030513	BP	e	positive regulation of BMP signaling pathway	2/202	37/32695	0.022	n.a.	2	1	1	1	Hes5, Sox11
GO:0007528	BP	e	neuromuscular junction development	2/202	37/32695	0.022	n.a.	2	1	1	1	Cacnb2, Tnc
GO:0060999	BP	e	positive regulation of dendritic spine development	2/202	37/32695	0.022	n.a.	2	1	1	1	Foxo6, Nlgn3
GO:0001707	BP	e	mesoderm formation	2/202	37/32695	0.022	n.a.	2	1	1	1	Nog, Nr4a3
GO:0042542	BP	e	response to hydrogen peroxide	2/202	38/32695	0.0231	n.a.	2	1	1	1	Casp3, Nr4a3
GO:0001654	BP	e	eye development	2/202	39/32695	0.0242	n.a.	2	1	1	1	Meis2, Sox11
GO:0002062	BP	e	chondrocyte differentiation	2/202	39/32695	0.0242	n.a.	2	1	1	1	Hes5, Mef2c
GO:0050890	BP	e	cognition	2/202	39/32695	0.0242	n.a.	2	1	1	1	Chl1, Cux2
GO:2000331	BP	e	regulation of terminal button organization	1/202	4/32695	0.0245	n.a.	1	1	1	1	Nlgn3
GO:0086016	BP	e	AV node cell action potential	1/202	4/32695	0.0245	n.a.	1	1	1	1	Scn5a
GO:0070295	BP	e	renal water absorption	1/202	4/32695	0.0245	n.a.	1	1	1	1	Aqp1
GO:0030104	BP	e	water homeostasis	1/202	4/32695	0.0245	n.a.	1	1	1	1	Aqp1
GO:0090403	BP	e	oxidative stress-induced premature senescence	1/202	4/32695	0.0245	n.a.	1	1	1	1	Arntl
GO:0071374	BP	e	cellular response to parathyroid hormone stimulus	1/202	4/32695	0.0245	n.a.	1	1	1	1	Mef2c
GO:2001013	BP	e	epithelial cell proliferation involved in renal tubule morphogenesis	1/202	4/32695	0.0245	n.a.	1	1	1	1	Mef2c
GO:0015793	BP	e	glycerol transport	1/202	4/32695	0.0245	n.a.	1	1	1	1	Aqp1
GO:0003289	BP	e	atrial septum primum morphogenesis	1/202	4/32695	0.0245	n.a.	1	1	1	1	Sox4
GO:0071474	BP	e	cellular hyperosmotic response	1/202	4/32695	0.0245	n.a.	1	1	1	1	Aqp1
GO:1904447	BP	e	folate import across plasma membrane	1/202	4/32695	0.0245	n.a.	1	1	1	1	Folr1
GO:0003091	BP	e	renal water homeostasis	1/202	4/32695	0.0245	n.a.	1	1	1	1	Wfs1
GO:0097494	BP	e	regulation of vesicle size	1/202	4/32695	0.0245	n.a.	1	1	1	1	Rab3b
GO:0060297	BP	e	regulation of sarcomere organization	1/202	4/32695	0.0245	n.a.	1	1	1	1	Mef2c
GO:0033605	BP	e	positive regulation of catecholamine secretion	1/202	4/32695	0.0245	n.a.	1	1	1	1	Stx1a
GO:0060024	BP	e	rhythmic synaptic transmission	1/202	4/32695	0.0245	n.a.	1	1	1	1	Nlgn3
GO:0098989	BP	e	NMDA selective glutamate receptor signaling pathway	1/202	4/32695	0.0245	n.a.	1	1	1	1	Grin2b
GO:0060005	BP	e	vestibular reflex	1/202	4/32695	0.0245	n.a.	1	1	1	1	Nr4a3
GO:0072086	BP	e	specification of loop of Henle identity	1/202	4/32695	0.0245	n.a.	1	1	1	1	Hes5
GO:1901660	BP	e	calcium ion export	1/202	4/32695	0.0245	n.a.	1	1	1	1	Atp2b4
GO:0032225	BP	e	regulation of synaptic transmission, dopaminergic	1/202	4/32695	0.0245	n.a.	1	1	1	1	Cntnap4
GO:0007423	BP	e	sensory organ development	1/202	4/32695	0.0245	n.a.	1	1	1	1	Grin2b
GO:0097167	BP	e	circadian regulation of translation	1/202	4/32695	0.0245	n.a.	1	1	1	1	Per1
GO:0002118	BP	e	aggressive behavior	1/202	4/32695	0.0245	n.a.	1	1	1	1	Penk
GO:0071322	BP	e	cellular response to carbohydrate stimulus	1/202	4/32695	0.0245	n.a.	1	1	1	1	Rps6ka2
GO:0060137	BP	e	maternal process involved in parturition	1/202	4/32695	0.0245	n.a.	1	1	1	1	Arntl
GO:0021533	BP	e	cell differentiation in hindbrain	1/202	4/32695	0.0245	n.a.	1	1	1	1	Nog
GO:0035984	BP	e	cellular response to trichostatin A	1/202	4/32695	0.0245	n.a.	1	1	1	1	Mef2c
GO:0021800	BP	e	cerebral cortex tangential migration	1/202	4/32695	0.0245	n.a.	1	1	1	1	Reln
GO:0086046	BP	e	membrane depolarization during SA node cell action potential	1/202	4/32695	0.0245	n.a.	1	1	1	1	Scn5a
GO:0090274	BP	e	positive regulation of somatostatin secretion	1/202	4/32695	0.0245	n.a.	1	1	1	1	Cckbr
GO:0072049	BP	e	comma-shaped body morphogenesis	1/202	4/32695	0.0245	n.a.	1	1	1	1	Hes5
GO:0051365	BP	e	cellular response to potassium ion starvation	1/202	4/32695	0.0245	n.a.	1	1	1	1	Hrk
GO:0008065	BP	e	establishment of blood-nerve barrier	1/202	4/32695	0.0245	n.a.	1	1	1	1	Cldn1
GO:0098915	BP	e	membrane repolarization during ventricular cardiac muscle cell action potential	1/202	4/32695	0.0245	n.a.	1	1	1	1	Kcne2
GO:0070314	BP	e	G1 to G0 transition	1/202	4/32695	0.0245	n.a.	1	1	1	1	1500015O10Rik
GO:0001839	BP	e	neural plate morphogenesis	1/202	4/32695	0.0245	n.a.	1	1	1	1	Nog
GO:0060447	BP	e	bud outgrowth involved in lung branching	1/202	4/32695	0.0245	n.a.	1	1	1	1	Tnc
GO:0002634	BP	e	regulation of germinal center formation	1/202	4/32695	0.0245	n.a.	1	1	1	1	Mef2c
GO:1901657	BP	e	glycosyl compound metabolic process	1/202	4/32695	0.0245	n.a.	1	1	1	1	Kl
GO:0038026	BP	e	reelin-mediated signaling pathway	1/202	4/32695	0.0245	n.a.	1	1	1	1	Reln
GO:0010454	BP	e	negative regulation of cell fate commitment	1/202	4/32695	0.0245	n.a.	1	1	1	1	Sostdc1
GO:0035910	BP	e	ascending aorta morphogenesis	1/202	4/32695	0.0245	n.a.	1	1	1	1	Sox4
GO:1902950	BP	e	regulation of dendritic spine maintenance	1/202	4/32695	0.0245	n.a.	1	1	1	1	Homer1
GO:1902951	BP	e	negative regulation of dendritic spine maintenance	1/202	4/32695	0.0245	n.a.	1	1	1	1	Grin2b
GO:0033563	BP	e	dorsal/ventral axon guidance	1/202	4/32695	0.0245	n.a.	1	1	1	1	Dcc
GO:1901843	BP	e	positive regulation of high voltage-gated calcium channel activity	1/202	4/32695	0.0245	n.a.	1	1	1	1	Cacnb2
GO:1901842	BP	e	negative regulation of high voltage-gated calcium channel activity	1/202	4/32695	0.0245	n.a.	1	1	1	1	Rrad
GO:0016358	BP	e	dendrite development	2/202	40/32695	0.0254	n.a.	2	1	1	1	Grin3a, Reln
GO:0050767	BP	e	regulation of neurogenesis	2/202	40/32695	0.0254	n.a.	2	1	1	1	Arntl, Hes5
GO:0045773	BP	e	positive regulation of axon extension	2/202	42/32695	0.0278	n.a.	2	1	1	1	Cdh4, L1cam
GO:0051930	BP	e	regulation of sensory perception of pain	2/202	44/32695	0.0303	n.a.	2	1	1	1	Cckbr, Ntsr1
GO:0046655	BP	e	folic acid metabolic process	1/202	5/32695	0.0305	n.a.	1	1	1	1	Folr1
GO:0051668	BP	e	localization within membrane	1/202	5/32695	0.0305	n.a.	1	1	1	1	Cdh13
GO:0098706	BP	e	ferric iron import across plasma membrane	1/202	5/32695	0.0305	n.a.	1	1	1	1	Steap2
GO:0086011	BP	e	membrane repolarization during action potential	1/202	5/32695	0.0305	n.a.	1	1	1	1	Kcne2
GO:0072050	BP	e	S-shaped body morphogenesis	1/202	5/32695	0.0305	n.a.	1	1	1	1	Hes5
GO:0044772	BP	e	mitotic cell cycle phase transition	1/202	5/32695	0.0305	n.a.	1	1	1	1	Lzts1
GO:0021871	BP	e	forebrain regionalization	1/202	5/32695	0.0305	n.a.	1	1	1	1	Pgap1
GO:0010694	BP	e	positive regulation of alkaline phosphatase activity	1/202	5/32695	0.0305	n.a.	1	1	1	1	Mef2c
GO:0033363	BP	e	secretory granule organization	1/202	5/32695	0.0305	n.a.	1	1	1	1	Aqp1
GO:0060666	BP	e	dichotomous subdivision of terminal units involved in salivary gland branching	1/202	5/32695	0.0305	n.a.	1	1	1	1	Plxnd1
GO:0070093	BP	e	negative regulation of glucagon secretion	1/202	5/32695	0.0305	n.a.	1	1	1	1	Cartpt
GO:0070327	BP	e	thyroid hormone transport	1/202	5/32695	0.0305	n.a.	1	1	1	1	Ttr
GO:0071205	BP	e	protein localization to juxtaparanode region of axon	1/202	5/32695	0.0305	n.a.	1	1	1	1	Cntnap2
GO:0008037	BP	e	cell recognition	1/202	5/32695	0.0305	n.a.	1	1	1	1	Igsf21
GO:1900748	BP	e	positive regulation of vascular endothelial growth factor signaling pathway	1/202	5/32695	0.0305	n.a.	1	1	1	1	Adamts3
GO:1902474	BP	e	positive regulation of protein localization to synapse	1/202	5/32695	0.0305	n.a.	1	1	1	1	Nlgn3
GO:2000481	BP	e	positive regulation of cAMP-dependent protein kinase activity	1/202	5/32695	0.0305	n.a.	1	1	1	1	Atp2b4
GO:0072102	BP	e	glomerulus morphogenesis	1/202	5/32695	0.0305	n.a.	1	1	1	1	Mef2c
GO:0060023	BP	e	soft palate development	1/202	5/32695	0.0305	n.a.	1	1	1	1	Sox11
GO:2000467	BP	e	positive regulation of glycogen (starch) synthase activity	1/202	5/32695	0.0305	n.a.	1	1	1	1	Ppp1r3g
GO:0003376	BP	e	sphingosine-1-phosphate signaling pathway	1/202	5/32695	0.0305	n.a.	1	1	1	1	Gpr6
GO:0060513	BP	e	prostatic bud formation	1/202	5/32695	0.0305	n.a.	1	1	1	1	Nog
GO:0048742	BP	e	regulation of skeletal muscle fiber development	1/202	5/32695	0.0305	n.a.	1	1	1	1	Hdac9
GO:0003253	BP	e	cardiac neural crest cell migration involved in outflow tract morphogenesis	1/202	5/32695	0.0305	n.a.	1	1	1	1	Folr1
GO:0097107	BP	e	postsynaptic density assembly	1/202	5/32695	0.0305	n.a.	1	1	1	1	Reln
GO:0046878	BP	e	positive regulation of saliva secretion	1/202	5/32695	0.0305	n.a.	1	1	1	1	Aqp1
GO:0050672	BP	e	negative regulation of lymphocyte proliferation	1/202	5/32695	0.0305	n.a.	1	1	1	1	Sox11
GO:0098712	BP	e	L-glutamate import across plasma membrane	1/202	5/32695	0.0305	n.a.	1	1	1	1	Ntsr1
GO:0002328	BP	e	pro-B cell differentiation	1/202	5/32695	0.0305	n.a.	1	1	1	1	Sox4
GO:0032098	BP	e	regulation of appetite	1/202	5/32695	0.0305	n.a.	1	1	1	1	Htr4
GO:0007256	BP	e	activation of JNKK activity	1/202	5/32695	0.0305	n.a.	1	1	1	1	Tnik
GO:0001957	BP	e	intramembranous ossification	1/202	5/32695	0.0305	n.a.	1	1	1	1	Mn1
GO:0061333	BP	e	renal tubule morphogenesis	1/202	5/32695	0.0305	n.a.	1	1	1	1	Mef2c
GO:0070779	BP	e	D-aspartate import across plasma membrane	1/202	5/32695	0.0305	n.a.	1	1	1	1	Ntsr1
GO:0044849	BP	e	estrous cycle	1/202	5/32695	0.0305	n.a.	1	1	1	1	Cckbr
GO:0090238	BP	e	positive regulation of arachidonic acid secretion	1/202	5/32695	0.0305	n.a.	1	1	1	1	Ntsr1
GO:1904491	BP	e	protein localization to ciliary transition zone	1/202	5/32695	0.0305	n.a.	1	1	1	1	Tctn2
GO:0061743	BP	e	motor learning	1/202	5/32695	0.0305	n.a.	1	1	1	1	Gpr88
GO:0046689	BP	e	response to mercury ion	1/202	5/32695	0.0305	n.a.	1	1	1	1	Pgam2
GO:0060676	BP	e	ureteric bud formation	1/202	5/32695	0.0305	n.a.	1	1	1	1	Nog
GO:0001661	BP	e	conditioned taste aversion	1/202	5/32695	0.0305	n.a.	1	1	1	1	Tbr1
GO:1900015	BP	e	regulation of cytokine production involved in inflammatory response	1/202	5/32695	0.0305	n.a.	1	1	1	1	Per1
GO:0045759	BP	e	negative regulation of action potential	1/202	5/32695	0.0305	n.a.	1	1	1	1	Hcn1
GO:0071704	BP	e	organic substance metabolic process	1/202	5/32695	0.0305	n.a.	1	1	1	1	Pgm2l1
GO:1903817	BP	e	negative regulation of voltage-gated potassium channel activity	1/202	5/32695	0.0305	n.a.	1	1	1	1	Kcne2
GO:0021764	BP	e	amygdala development	1/202	5/32695	0.0305	n.a.	1	1	1	1	Tbr1
GO:0033564	BP	e	anterior/posterior axon guidance	1/202	5/32695	0.0305	n.a.	1	1	1	1	Dcc
GO:0097119	BP	e	postsynaptic density protein 95 clustering	1/202	5/32695	0.0305	n.a.	1	1	1	1	Reln
GO:0007600	BP	e	sensory perception	1/202	5/32695	0.0305	n.a.	1	1	1	1	Penk
GO:1901841	BP	e	regulation of high voltage-gated calcium channel activity	1/202	5/32695	0.0305	n.a.	1	1	1	1	Rrad
GO:0030890	BP	e	positive regulation of B cell proliferation	2/202	45/32695	0.0316	n.a.	2	1	1	1	Mef2c, Slc39a10
GO:0030336	BP	e	negative regulation of cell migration	3/202	112/32695	0.0324	n.a.	3	1	1	1	Dpysl3, Nav3, Nog
GO:0009411	BP	e	response to UV	2/202	46/32695	0.0329	n.a.	2	1	1	1	Casp3, Dtl
GO:0045471	BP	e	response to ethanol	2/202	47/32695	0.0342	n.a.	2	1	1	1	Grin2b, Grin3a
GO:0021915	BP	e	neural tube development	2/202	47/32695	0.0342	n.a.	2	1	1	1	Hes5, Nog
GO:0051726	BP	e	regulation of cell cycle	3/202	116/32695	0.0354	n.a.	3	1	1	1	Arntl, Dtl, Wfs1
GO:0050808	BP	e	synapse organization	2/202	48/32695	0.0356	n.a.	2	1	1	1	L1cam, Nlgn3
GO:0016042	BP	e	lipid catabolic process	3/202	117/32695	0.0362	n.a.	3	1	1	1	Plcxd2, Plcxd3, Tbl1xr1
GO:0045652	BP	e	regulation of megakaryocyte differentiation	1/202	6/32695	0.0365	n.a.	1	1	1	1	Mef2c
GO:0086012	BP	e	membrane depolarization during cardiac muscle cell action potential	1/202	6/32695	0.0365	n.a.	1	1	1	1	Scn5a
GO:0086015	BP	e	SA node cell action potential	1/202	6/32695	0.0365	n.a.	1	1	1	1	Scn5a
GO:1902259	BP	e	regulation of delayed rectifier potassium channel activity	1/202	6/32695	0.0365	n.a.	1	1	1	1	Kcne2
GO:1905563	BP	e	negative regulation of vascular endothelial cell proliferation	1/202	6/32695	0.0365	n.a.	1	1	1	1	Mef2c
GO:1903243	BP	e	negative regulation of cardiac muscle hypertrophy in response to stress	1/202	6/32695	0.0365	n.a.	1	1	1	1	Atp2b4
GO:0070447	BP	e	positive regulation of oligodendrocyte progenitor proliferation	1/202	6/32695	0.0365	n.a.	1	1	1	1	Nog
GO:0071476	BP	e	cellular hypotonic response	1/202	6/32695	0.0365	n.a.	1	1	1	1	Prkg2
GO:1903208	BP	e	negative regulation of hydrogen peroxide-induced neuron death	1/202	6/32695	0.0365	n.a.	1	1	1	1	Nr4a3
GO:0001821	BP	e	histamine secretion	1/202	6/32695	0.0365	n.a.	1	1	1	1	Cckbr
GO:0060022	BP	e	hard palate development	1/202	6/32695	0.0365	n.a.	1	1	1	1	Sox11
GO:1901621	BP	e	negative regulation of smoothened signaling pathway involved in dorsal/ventral neural tube patterning	1/202	6/32695	0.0365	n.a.	1	1	1	1	Gpr161
GO:0061038	BP	e	uterus morphogenesis	1/202	6/32695	0.0365	n.a.	1	1	1	1	Kdm5b
GO:0010659	BP	e	cardiac muscle cell apoptotic process	1/202	6/32695	0.0365	n.a.	1	1	1	1	Rps6ka2
GO:0051823	BP	e	regulation of synapse structural plasticity	1/202	6/32695	0.0365	n.a.	1	1	1	1	Ncan
GO:1902083	BP	e	negative regulation of peptidyl-cysteine S-nitrosylation	1/202	6/32695	0.0365	n.a.	1	1	1	1	Atp2b4
GO:1901142	BP	e	insulin metabolic process	1/202	6/32695	0.0365	n.a.	1	1	1	1	Ide
GO:2000821	BP	e	regulation of grooming behavior	1/202	6/32695	0.0365	n.a.	1	1	1	1	Cntnap4
GO:0097104	BP	e	postsynaptic membrane assembly	1/202	6/32695	0.0365	n.a.	1	1	1	1	Nlgn3
GO:0055012	BP	e	ventricular cardiac muscle cell differentiation	1/202	6/32695	0.0365	n.a.	1	1	1	1	Mef2c
GO:0015884	BP	e	folic acid transport	1/202	6/32695	0.0365	n.a.	1	1	1	1	Folr1
GO:0034720	BP	e	histone H3-K4 demethylation	1/202	6/32695	0.0365	n.a.	1	1	1	1	Kdm5b
GO:0010701	BP	e	positive regulation of norepinephrine secretion	1/202	6/32695	0.0365	n.a.	1	1	1	1	Stx1a
GO:0061469	BP	e	regulation of type B pancreatic cell proliferation	1/202	6/32695	0.0365	n.a.	1	1	1	1	Nr4a3
GO:0003231	BP	e	cardiac ventricle development	1/202	6/32695	0.0365	n.a.	1	1	1	1	Scn5a
GO:1903715	BP	e	regulation of aerobic respiration	1/202	6/32695	0.0365	n.a.	1	1	1	1	Actn3
GO:2000675	BP	e	negative regulation of type B pancreatic cell apoptotic process	1/202	6/32695	0.0365	n.a.	1	1	1	1	Wfs1
GO:0048318	BP	e	axial mesoderm development	1/202	6/32695	0.0365	n.a.	1	1	1	1	Nog
GO:1904753	BP	e	negative regulation of vascular associated smooth muscle cell migration	1/202	6/32695	0.0365	n.a.	1	1	1	1	Mef2c
GO:0061312	BP	e	BMP signaling pathway involved in heart development	1/202	6/32695	0.0365	n.a.	1	1	1	1	Nog
GO:0060372	BP	e	regulation of atrial cardiac muscle cell membrane repolarization	1/202	6/32695	0.0365	n.a.	1	1	1	1	Scn5a
GO:0051775	BP	e	response to redox state	1/202	6/32695	0.0365	n.a.	1	1	1	1	Arntl
GO:0014033	BP	e	neural crest cell differentiation	1/202	6/32695	0.0365	n.a.	1	1	1	1	Mef2c
GO:0071870	BP	e	cellular response to catecholamine stimulus	1/202	6/32695	0.0365	n.a.	1	1	1	1	Nr4a3
GO:0010815	BP	e	bradykinin catabolic process	1/202	6/32695	0.0365	n.a.	1	1	1	1	Ide
GO:0048633	BP	e	positive regulation of skeletal muscle tissue growth	1/202	6/32695	0.0365	n.a.	1	1	1	1	Actn3
GO:0090080	BP	e	positive regulation of MAPKKK cascade by fibroblast growth factor receptor signaling pathway	1/202	6/32695	0.0365	n.a.	1	1	1	1	Kl
GO:0098815	BP	e	modulation of excitatory postsynaptic potential	1/202	6/32695	0.0365	n.a.	1	1	1	1	Stx1a
GO:0097114	BP	e	NMDA glutamate receptor clustering	1/202	6/32695	0.0365	n.a.	1	1	1	1	Reln
GO:0048570	BP	e	notochord morphogenesis	1/202	6/32695	0.0365	n.a.	1	1	1	1	Nog
GO:0042420	BP	e	dopamine catabolic process	1/202	6/32695	0.0365	n.a.	1	1	1	1	Moxd1
GO:0051017	BP	e	actin filament bundle assembly	2/202	49/32695	0.0369	n.a.	2	1	1	1	Dpysl3, Marcks
GO:0007219	BP	e	Notch signaling pathway	3/202	119/32695	0.0378	n.a.	3	1	1	1	Dner, Hes5, Pgam2
GO:0001666	BP	e	response to hypoxia	3/202	119/32695	0.0378	n.a.	3	1	1	1	Grin2b, Nr4a2, Sox4
GO:0035176	BP	e	social behavior	2/202	50/32695	0.0383	n.a.	2	1	1	1	Cntnap2, Nlgn3
GO:0006906	BP	e	vesicle fusion	2/202	50/32695	0.0383	n.a.	2	1	1	1	Stx1a, Syt5
GO:0034605	BP	e	cellular response to heat	2/202	50/32695	0.0383	n.a.	2	1	1	1	Arpp21, Xylt1
GO:0051592	BP	e	response to calcium ion	2/202	50/32695	0.0383	n.a.	2	1	1	1	Hcn1, Homer1
GO:0035690	BP	e	cellular response to drug	2/202	50/32695	0.0383	n.a.	2	1	1	1	Kcne2, Mef2c
GO:0030308	BP	e	negative regulation of cell growth	3/202	122/32695	0.0402	n.a.	3	1	1	1	Gng4, Rrad, Zmat3
GO:0006814	BP	e	sodium ion transport	3/202	122/32695	0.0402	n.a.	3	1	1	1	Hcn1, Scn5a, Slc4a8
GO:0007197	BP	e	adenylate cyclase-inhibiting G-protein coupled acetylcholine receptor signaling pathway	1/202	7/32695	0.0425	n.a.	1	1	1	1	Chrm4
GO:0086014	BP	e	atrial cardiac muscle cell action potential	1/202	7/32695	0.0425	n.a.	1	1	1	1	Scn5a
GO:0051971	BP	e	positive regulation of transmission of nerve impulse	1/202	7/32695	0.0425	n.a.	1	1	1	1	Cartpt
GO:0034983	BP	e	peptidyl-lysine deacetylation	1/202	7/32695	0.0425	n.a.	1	1	1	1	Hdac9
GO:0010807	BP	e	regulation of synaptic vesicle priming	1/202	7/32695	0.0425	n.a.	1	1	1	1	Stx1a
GO:0097553	BP	e	calcium ion transmembrane import into cytosol	1/202	7/32695	0.0425	n.a.	1	1	1	1	Grin2b
GO:0002035	BP	e	brain renin-angiotensin system	1/202	7/32695	0.0425	n.a.	1	1	1	1	Rps6ka2
GO:0014047	BP	e	glutamate secretion	1/202	7/32695	0.0425	n.a.	1	1	1	1	Grm2
GO:0045743	BP	e	positive regulation of fibroblast growth factor receptor signaling pathway	1/202	7/32695	0.0425	n.a.	1	1	1	1	Fgfbp3
GO:0071578	BP	e	zinc ion import across plasma membrane	1/202	7/32695	0.0425	n.a.	1	1	1	1	Slc39a10
GO:0045835	BP	e	negative regulation of meiotic nuclear division	1/202	7/32695	0.0425	n.a.	1	1	1	1	Rps6ka2
GO:0060763	BP	e	mammary duct terminal end bud growth	1/202	7/32695	0.0425	n.a.	1	1	1	1	Kdm5b
GO:0002467	BP	e	germinal center formation	1/202	7/32695	0.0425	n.a.	1	1	1	1	Mef2c
GO:0060536	BP	e	cartilage morphogenesis	1/202	7/32695	0.0425	n.a.	1	1	1	1	Mef2c
GO:0007215	BP	e	glutamate receptor signaling pathway	1/202	7/32695	0.0425	n.a.	1	1	1	1	Grik3
GO:0050861	BP	e	positive regulation of B cell receptor signaling pathway	1/202	7/32695	0.0425	n.a.	1	1	1	1	Slc39a10
GO:0090279	BP	e	regulation of calcium ion import	1/202	7/32695	0.0425	n.a.	1	1	1	1	Homer1
GO:0060373	BP	e	regulation of ventricular cardiac muscle cell membrane depolarization	1/202	7/32695	0.0425	n.a.	1	1	1	1	Scn5a
GO:0051963	BP	e	regulation of synapse assembly	1/202	7/32695	0.0425	n.a.	1	1	1	1	Mef2c
GO:0051280	BP	e	negative regulation of release of sequestered calcium ion into cytosol	1/202	7/32695	0.0425	n.a.	1	1	1	1	Ntsr1
GO:0060613	BP	e	fat pad development	1/202	7/32695	0.0425	n.a.	1	1	1	1	Tbl1xr1
GO:0014054	BP	e	positive regulation of gamma-aminobutyric acid secretion	1/202	7/32695	0.0425	n.a.	1	1	1	1	Ntsr1
GO:0042769	BP	e	DNA damage response, detection of DNA damage	1/202	7/32695	0.0425	n.a.	1	1	1	1	Sox4
GO:0042297	BP	e	vocal learning	1/202	7/32695	0.0425	n.a.	1	1	1	1	Cntnap2
GO:0090324	BP	e	negative regulation of oxidative phosphorylation	1/202	7/32695	0.0425	n.a.	1	1	1	1	Actn3
GO:0006999	BP	e	nuclear pore organization	1/202	7/32695	0.0425	n.a.	1	1	1	1	Pom121
GO:0045794	BP	e	negative regulation of cell volume	1/202	7/32695	0.0425	n.a.	1	1	1	1	Prkg2
GO:0032534	BP	e	regulation of microvillus assembly	1/202	7/32695	0.0425	n.a.	1	1	1	1	Klf5
GO:0048752	BP	e	semicircular canal morphogenesis	1/202	7/32695	0.0425	n.a.	1	1	1	1	Nr4a3
GO:0015677	BP	e	copper ion import	1/202	7/32695	0.0425	n.a.	1	1	1	1	Steap2
GO:0015696	BP	e	ammonium transport	1/202	7/32695	0.0425	n.a.	1	1	1	1	Aqp1
GO:0030422	BP	e	production of siRNA involved in RNA interference	1/202	7/32695	0.0425	n.a.	1	1	1	1	Henmt1
GO:0035725	BP	e	sodium ion transmembrane transport	2/202	53/32695	0.0426	n.a.	2	1	1	1	Hcn1, Scn5a
GO:0010629	BP	e	negative regulation of gene expression	5/202	310/32695	0.044	n.a.	5	1	1	1	Aff2, Mef2c, Mycn, Nog, Sox11
GO:0008286	BP	e	insulin receptor signaling pathway	2/202	54/32695	0.0441	n.a.	2	1	1	1	Foxo6, Kl
GO:0050877	BP	e	nervous system process	2/202	55/32695	0.0455	n.a.	2	1	1	1	Gabra3, Wfs1
GO:0007601	BP	e	visual perception	3/202	129/32695	0.0461	n.a.	3	1	1	1	Cacnb2, Olfm2, Wfs1
GO:0055009	BP	e	atrial cardiac muscle tissue morphogenesis	1/202	8/32695	0.0484	n.a.	1	1	1	1	Nog
GO:0061303	BP	e	cornea development in camera-type eye	1/202	8/32695	0.0484	n.a.	1	1	1	1	Sox11
GO:0044320	BP	e	cellular response to leptin stimulus	1/202	8/32695	0.0484	n.a.	1	1	1	1	Nr4a3
GO:0042058	BP	e	regulation of epidermal growth factor receptor signaling pathway	1/202	8/32695	0.0484	n.a.	1	1	1	1	Cdh13
GO:0040012	BP	e	regulation of locomotion	1/202	8/32695	0.0484	n.a.	1	1	1	1	Chrm4
GO:0060290	BP	e	transdifferentiation	1/202	8/32695	0.0484	n.a.	1	1	1	1	Mef2c
GO:1900744	BP	e	regulation of p38MAPK cascade	1/202	8/32695	0.0484	n.a.	1	1	1	1	Per1
GO:0030728	BP	e	ovulation	1/202	8/32695	0.0484	n.a.	1	1	1	1	Nrip1
GO:2000480	BP	e	negative regulation of cAMP-dependent protein kinase activity	1/202	8/32695	0.0484	n.a.	1	1	1	1	Prkar2b
GO:0061037	BP	e	negative regulation of cartilage development	1/202	8/32695	0.0484	n.a.	1	1	1	1	Nog
GO:1901642	BP	e	nucleoside transmembrane transport	1/202	8/32695	0.0484	n.a.	1	1	1	1	Slc29a4
GO:0060998	BP	e	regulation of dendritic spine development	1/202	8/32695	0.0484	n.a.	1	1	1	1	Mef2c
GO:0046321	BP	e	positive regulation of fatty acid oxidation	1/202	8/32695	0.0484	n.a.	1	1	1	1	Nr4a3
GO:0048743	BP	e	positive regulation of skeletal muscle fiber development	1/202	8/32695	0.0484	n.a.	1	1	1	1	Actn3
GO:2000809	BP	e	positive regulation of synaptic vesicle clustering	1/202	8/32695	0.0484	n.a.	1	1	1	1	Nlgn3
GO:0003183	BP	e	mitral valve morphogenesis	1/202	8/32695	0.0484	n.a.	1	1	1	1	Sox4
GO:2000650	BP	e	negative regulation of sodium ion transmembrane transporter activity	1/202	8/32695	0.0484	n.a.	1	1	1	1	Hecw1
GO:0042596	BP	e	fear response	1/202	8/32695	0.0484	n.a.	1	1	1	1	Grin2b
GO:0051057	BP	e	positive regulation of small GTPase mediated signal transduction	1/202	8/32695	0.0484	n.a.	1	1	1	1	Reln
GO:0001956	BP	e	positive regulation of neurotransmitter secretion	1/202	8/32695	0.0484	n.a.	1	1	1	1	Stx1a
GO:0003223	BP	e	ventricular compact myocardium morphogenesis	1/202	8/32695	0.0484	n.a.	1	1	1	1	Nog
GO:0051152	BP	e	positive regulation of smooth muscle cell differentiation	1/202	8/32695	0.0484	n.a.	1	1	1	1	Olfm2
GO:0021861	BP	e	forebrain radial glial cell differentiation	1/202	8/32695	0.0484	n.a.	1	1	1	1	Hes5
GO:0060371	BP	e	regulation of atrial cardiac muscle cell membrane depolarization	1/202	8/32695	0.0484	n.a.	1	1	1	1	Scn5a
GO:0015844	BP	e	monoamine transport	1/202	8/32695	0.0484	n.a.	1	1	1	1	Slc29a4
GO:0019725	BP	e	cellular homeostasis	1/202	8/32695	0.0484	n.a.	1	1	1	1	Aqp1
GO:0031987	BP	e	locomotion involved in locomotory behavior	1/202	8/32695	0.0484	n.a.	1	1	1	1	Adgrl3
GO:0061002	BP	e	negative regulation of dendritic spine morphogenesis	1/202	8/32695	0.0484	n.a.	1	1	1	1	Nlgn3
GO:0060732	BP	e	positive regulation of inositol phosphate biosynthetic process	1/202	8/32695	0.0484	n.a.	1	1	1	1	Ntsr1
GO:0015670	BP	e	carbon dioxide transport	1/202	8/32695	0.0484	n.a.	1	1	1	1	Aqp1
GO:0006144	BP	e	purine nucleobase metabolic process	1/202	8/32695	0.0484	n.a.	1	1	1	1	Ttr
GO:0032964	BP	e	collagen biosynthetic process	1/202	8/32695	0.0484	n.a.	1	1	1	1	Adamts3
GO:0036289	BP	e	peptidyl-serine autophosphorylation	1/202	8/32695	0.0484	n.a.	1	1	1	1	Prkg2
GO:0001947	BP	e	heart looping	2/202	57/32695	0.0486	n.a.	2	1	1	1	Folr1, Mef2c
GO:0007608	BP	p	sensory perception of smell	0/202	1114/32695	0.00148	n.a.	0	1	1	1

## Sheet: GO of DR-ameliorate ODEGs
# Generated by GOATOOLS v0.8.4 (2019-06-09)
# min_ratio=None pval=0.05
GO	NS	enrichment	name	ratio_in_study	ratio_in_pop	p_uncorrected	depth	study_count	p_bonferroni	p_sidak	p_holm	study_items
GO:0042590	BP	e	antigen processing and presentation of exogenous peptide antigen via MHC class I	5/769	6/32695	4.18e-08	n.a.	5	0.000496	0.000484	0.000496	Fcer1g, Fcgr1, Fcgr3, H2-K1, Ifi30
GO:0042270	BP	e	protection from natural killer cell mediated cytotoxicity	5/769	6/32695	4.18e-08	n.a.	5	0.000496	0.000484	0.000496	Clec2d, H2-T23, Serpinb9, Tap1, Tap2
GO:2000406	BP	e	positive regulation of T cell migration	7/769	17/32695	6.14e-08	n.a.	7	0.000729	0.00071	0.000729	Aif1, Ccl5, Cxcl10, Cxcl12, Dock8, Lgals9, Pycard
GO:0001516	BP	e	prostaglandin biosynthetic process	7/769	17/32695	6.14e-08	n.a.	7	0.000729	0.00071	0.000729	Cd74, Edn1, Hpgds, Mgst1, Ptgds, Ptges, Ptgs2
GO:0016064	BP	e	immunoglobulin mediated immune response	7/769	17/32695	6.14e-08	n.a.	7	0.000729	0.00071	0.000729	C4b, Cd74, Fcer1g, Fcgr2b, Il4ra, Inpp5d, Irf7
GO:0034341	BP	e	response to interferon-gamma	10/769	25/32695	6.86e-08	n.a.	10	0.000814	0.000793	0.000814	Bst2, Ccl5, Cxcl16, H2-Aa, H2-Eb1, Ifitm1, Ifitm3, Irgm2, Slc11a1, Trim21
GO:0032481	BP	e	positive regulation of type I interferon production	7/769	18/32695	9.84e-08	n.a.	7	0.00117	0.00114	0.00117	Cd14, Dhx58, Irf1, Irf7, Plcg2, Tmem173, Zc3hav1
GO:0045576	BP	e	mast cell activation	6/769	12/32695	1.36e-07	n.a.	6	0.00161	0.00157	0.00161	Cd48, Fcer1g, Fcgr2b, Fcgr3, Fyb, Tlr4
GO:0035458	BP	e	cellular response to interferon-beta	16/769	37/32695	1.45e-07	n.a.	16	0.00172	0.00168	0.00172	Aim2, Gbp2, Gbp3, Gm4951, Ifi203, Ifi204, Ifi47, Ifit1, Ifit3, Igtp, Iigp1, Irf1, Irgm1, Irgm2, Stat1, Tmem173
GO:0051603	BP	e	proteolysis involved in cellular protein catabolic process	11/769	61/32695	1.63e-07	n.a.	11	0.00193	0.00188	0.00193	Casp8, Ctsc, Ctsh, Ctsk, Ctsl, Ctss, Ctsz, Psmb8, Psmb9, Scpep1, Tinagl1
GO:0071347	BP	e	cellular response to interleukin-1	11/769	50/32695	2.15e-07	n.a.	11	0.00255	0.00248	0.00255	Ccl12, Ccl3, Ccl5, Ccl6, Ccl8, Ccl9, Fn1, Irf1, Pycard, Serpine1, Zc3h12a
GO:0032729	BP	e	positive regulation of interferon-gamma production	10/769	50/32695	2.15e-07	n.a.	10	0.00255	0.00248	0.00255	Bcl3, Cd14, H2-M3, Havcr2, Il18, Irf8, Pycard, Runx1, Slc11a1, Tlr4
GO:0050729	BP	e	positive regulation of inflammatory response	14/769	63/32695	2.3e-07	n.a.	14	0.00273	0.00266	0.00272	Ccl3, Ccl6, Ccl9, Ccr5, Ctss, Gpsm3, Il33, Pla2g4a, Serpine1, Stat5a, Tgm2, Tlr2, Tlr4, Tnfrsf1a
GO:0032727	BP	e	positive regulation of interferon-alpha production	6/769	13/32695	2.47e-07	n.a.	6	0.00294	0.00286	0.00293	Ddx58, Ifih1, Irf7, Stat1, Tlr4, Zc3hav1
GO:0031663	BP	e	lipopolysaccharide-mediated signaling pathway	9/769	29/32695	2.5e-07	n.a.	9	0.00297	0.0029	0.00297	Ccl12, Ccl5, Cd14, Il18, Lyn, Nos3, Stat1, Tlr4, Trem2
GO:0002548	BP	e	monocyte chemotaxis	8/769	29/32695	2.5e-07	n.a.	8	0.00297	0.0029	0.00297	Anxa1, Ccl12, Ccl3, Ccl5, Ccl6, Ccl8, Ccl9, Lgals3
GO:0019221	BP	e	cytokine-mediated signaling pathway	16/769	108/32695	2.56e-07	n.a.	16	0.00304	0.00296	0.00304	Ccl12, Crlf2, Csf1r, Csf2rb, Csf2rb2, Cx3cr1, Iigp1, Il10rb, Il1a, Irak3, Pf4, Ptpn6, Stat1, Stat3, Stat5a, Tnfrsf1a
GO:0048661	BP	e	positive regulation of smooth muscle cell proliferation	14/769	78/32695	2.76e-07	n.a.	14	0.00328	0.0032	0.00328	Aif1, C3ar1, Ccl5, Cyba, Edn1, Hmox1, Il18, Ptgs2, Shc1, Stat1, Tgfbr2, Tgm2, Vegfa, Wisp1
GO:0042742	BP	e	defense response to bacterium	20/769	143/32695	2.87e-07	n.a.	20	0.00341	0.00332	0.0034	Anxa3, Bcl3, Cxcl13, Defb1, Fcer1g, Fcgr1, H2-K1, H2-M3, Irf8, Irgm2, Isg15, Lyz2, Naip2, Pglyrp1, Serpinb9, Shc1, Slamf8, Slc11a1, Stab1, Tnfrsf1a
GO:0034154	BP	e	toll-like receptor 7 signaling pathway	4/769	4/32695	3.04e-07	n.a.	4	0.00361	0.00351	0.0036	Havcr2, Pik3ap1, Tlr7, Unc93b1
GO:0048002	BP	e	antigen processing and presentation of peptide antigen	4/769	4/32695	3.04e-07	n.a.	4	0.00361	0.00351	0.0036	Ctss, H2-Aa, H2-Ab1, Slc11a1
GO:0006909	BP	e	phagocytosis	12/769	52/32695	3.17e-07	n.a.	12	0.00376	0.00367	0.00375	Anxa1, Anxa3, Cd302, Hck, Irf8, Itgb2, Ncf2, Ncf4, Pecam1, Pld4, Slc11a1, Vav1
GO:0001503	BP	e	ossification	16/769	94/32695	3.19e-07	n.a.	16	0.00378	0.00369	0.00378	Bmp6, Bmp7, Clec3b, Csf1, Ddr2, Dlk1, Dmp1, Ecm1, Foxc1, Ifitm1, Igf2, Kazald1, Mgp, Rassf2, Rsad2, Spp1
GO:0006952	BP	e	defense response	20/769	110/32695	3.22e-07	n.a.	20	0.00383	0.00373	0.00382	Ccr5, Cd74, Cxcl10, Cxcl12, Cxcl13, Cxcl5, Defb1, Fcgr2b, Gm4951, Ifi47, Igtp, Iigp1, Irgm1, Irgm2, Lsp1, Pf4, Ssc5d, Tap1, Tapbp, Tnfrsf1a
GO:0002224	BP	e	toll-like receptor signaling pathway	7/769	21/32695	3.38e-07	n.a.	7	0.00401	0.00391	0.00401	Cd86, Irak3, Tlr13, Tlr2, Tlr4, Tlr7, Unc93b1
GO:0045766	BP	e	positive regulation of angiogenesis	29/769	145/32695	3.47e-07	n.a.	29	0.00413	0.00402	0.00412	Acvrl1, Adm, Anxa3, C3, C3ar1, C5ar1, Ccl5, Ctsh, Cx3cr1, Cybb, Cyp1b1, Ecm1, Eng, Hk2, Hmox1, Igf2, Il1a, Itgb2, Lgals3, Lrg1, Nfe2l2, Nos3, Runx1, Serpine1, Stat3, Tgfbr2, Tnfrsf1a, Vegfa, Zc3h12a
GO:0045071	BP	e	negative regulation of viral genome replication	11/769	41/32695	3.75e-07	n.a.	11	0.00446	0.00435	0.00445	Apobec3, Bst2, Ccl5, Eif2ak2, Ifitm1, Ifitm3, Isg15, Isg20, Oasl2, Rsad2, Zc3hav1
GO:0001938	BP	e	positive regulation of endothelial cell proliferation	11/769	66/32695	3.76e-07	n.a.	11	0.00446	0.00435	0.00445	Acvrl1, Ang, Bmp6, Cav1, Cxcl12, Cyba, Ecm1, Lrg1, Plxnb3, Stat5a, Vegfa
GO:0008360	BP	e	regulation of cell shape	26/769	147/32695	4.19e-07	n.a.	26	0.00498	0.00485	0.00497	Anxa1, Arap3, Arhgap18, Ccl12, Ccl3, Cdc42ep1, Cdc42ep2, Cdc42ep5, Csf1r, Ermn, Fblim1, Fes, Fn1, Hck, Hexb, Icam1, Msn, Myl12a, Pdpn, Plxnb3, Rhoc, Rhoj, S100b, Syne3, Vegfa, Wipf1
GO:0019886	BP	e	antigen processing and presentation of exogenous peptide antigen via MHC class II	8/769	14/32695	4.24e-07	n.a.	8	0.00504	0.00491	0.00503	Cd74, Fcer1g, Fcgr2b, H2-Aa, H2-Ab1, H2-Eb1, Ifi30, Unc93b1
GO:0006911	BP	e	phagocytosis, engulfment	9/769	31/32695	4.41e-07	n.a.	9	0.00524	0.00511	0.00523	Aif1, Bin2, C3, Fcer1g, Fcgr1, Fcgr2b, Fcgr3, Itgb2, Trem2
GO:0009615	BP	e	response to virus	20/769	54/32695	4.59e-07	n.a.	20	0.00545	0.00532	0.00544	Bcl3, Bst2, Ccl5, Ddx58, Dhx58, Eif2ak2, Ifih1, Ifit1, Ifit2, Ifitm1, Ifitm3, Irak3, Isg20, Lcn2, Mx1, Oas2, Oasl2, Rsad2, Tlr13, Zc3hav1
GO:0051607	BP	e	defense response to virus	38/769	167/32695	4.81e-07	n.a.	38	0.00571	0.00556	0.00569	Apobec1, Apobec3, Bst2, Cd86, Cxcl10, Ddx58, Dhx58, Eif2ak2, Ifih1, Ifit1, Ifit2, Ifit3, Ifit3b, Ifitm1, Ifitm3, Il10rb, Il33, Irf1, Irf7, Isg15, Isg20, Itgax, Mx1, Mx2, Oas2, Oasl2, Ptprc, Pycard, Rsad2, Rtp4, Slfn8, Stat1, Tlr7, Tmem173, Trim30a, Trim34a, Unc93b1, Zc3hav1
GO:0030198	BP	e	extracellular matrix organization	24/769	131/32695	4.98e-07	n.a.	24	0.00591	0.00576	0.00589	Adamtsl4, Bcl3, Col11a2, Col18a1, Col27a1, Col4a6, Col5a2, Col9a2, Crispld2, Dmp1, Eln, Emilin1, Fbln1, Fn1, Gfap, Kazald1, Lgals3, Mpzl3, Reck, Scara3, Tgfbi, Tnfrsf11b, Vtn, Vwa1
GO:0042127	BP	e	regulation of cell proliferation	19/769	207/32695	5.21e-07	n.a.	19	0.00618	0.00603	0.00617	Anxa1, Apobec1, Cxcl10, Fes, Hck, Il4ra, Jag1, Lyn, Pf4, Pla2g4a, Plau, Ptgs2, S100a11, Sat1, Serpine1, Shc1, Tal1, Tgfbr2, Txnip
GO:0032755	BP	e	positive regulation of interleukin-6 production	11/769	55/32695	5.5e-07	n.a.	11	0.00653	0.00636	0.00651	Ccr5, Cyba, Ddx58, Fcer1g, Il1a, Il33, Pycard, Rab7b, Tlr2, Tlr4, Tlr7
GO:0030335	BP	e	positive regulation of cell migration	24/769	208/32695	5.61e-07	n.a.	24	0.00666	0.00649	0.00664	Aif1, C3ar1, Ccl5, Cd151, Cd274, Col18a1, Csf1, Csf1r, Ctsh, Cxcl10, Cxcl12, Cxcl16, Dab2, Edn1, Fermt3, Fn1, Gpnmb, Itga5, Lyn, Myo1f, Myoc, Pdpn, Plau, Vegfa
GO:0042832	BP	e	defense response to protozoan	11/769	32/32695	5.76e-07	n.a.	11	0.00684	0.00667	0.00682	Bcl3, Cd37, Gbp2, Gbp3, Gbp7, Iigp1, Il4ra, Irf8, Irgm2, Pf4, Slc11a1
GO:0016477	BP	e	cell migration	21/769	229/32695	5.83e-07	n.a.	21	0.00692	0.00674	0.0069	Ang, Asap3, Cd151, Cd44, Cd63, Clec14a, Emilin1, Eng, Fes, Foxc1, Gab2, Itgb2, Itgb5, Lcp1, Nckap1l, Podxl, Rhoc, Rhoj, St14, Vegfa, Vtn
GO:0006935	BP	e	chemotaxis	24/769	133/32695	6.06e-07	n.a.	24	0.00719	0.00701	0.00717	C3ar1, C5ar1, Ccl12, Ccl28, Ccl3, Ccl5, Ccl6, Ccl8, Ccl9, Ccr5, Cx3cr1, Cxcl10, Cxcl12, Cxcl13, Cxcl16, Cxcl5, Ecscr, Fes, Lgals9, Lsp1, Nckap1l, Pf4, Rac2, Robo3
GO:0008284	BP	e	positive regulation of cell proliferation	39/769	535/32695	6.23e-07	n.a.	39	0.0074	0.00721	0.00737	Adm, Aldh1a2, Apln, Atf3, Col18a1, Crlf2, Csf1, Csf1r, Ctsh, Cxcl10, Cxcl12, Ddr2, Edn1, Edn3, Efemp1, Fn1, Gab2, Hck, Hcls1, Hlx, Igf2, Lgals3, Lyn, Mlxipl, Osmr, Pla2g4a, Plau, Prl, Ptgfr, Ptgs2, Ptpn6, Rac2, S100b, Shc1, Stat1, Stat3, Stat5a, Tbx1, Vegfa
GO:0032722	BP	e	positive regulation of chemokine production	7/769	23/32695	6.84e-07	n.a.	7	0.00812	0.00792	0.00809	Eif2ak2, Havcr2, Il18, Lgals9, Tlr2, Tlr4, Tlr7
GO:0071222	BP	e	cellular response to lipopolysaccharide	23/769	211/32695	6.98e-07	n.a.	23	0.00829	0.00808	0.00826	Cd14, Cd180, Cd274, Cd86, Cxcl10, Cxcl13, Cxcl16, Cxcl5, Fcgr4, Gbp2, Havcr2, Irf8, Irgm2, Litaf, Mrc1, Nr1h3, Pf4, Pycard, Serpine1, Stat1, Tlr4, Tnfrsf1b, Zc3h12a
GO:0070098	BP	e	chemokine-mediated signaling pathway	12/769	44/32695	7.13e-07	n.a.	12	0.00847	0.00826	0.00844	Ccl12, Ccl3, Ccl5, Ccl6, Ccl8, Ccl9, Cxcl10, Cxcl12, Cxcl13, Cxcl5, Foxc1, Pf4
GO:0019882	BP	e	antigen processing and presentation	9/769	33/32695	7.45e-07	n.a.	9	0.00885	0.00862	0.00881	Cd74, H2-Aa, H2-Ab1, H2-D1, H2-Eb1, H2-K1, Psmb8, Psmb9, Unc93b1
GO:0007166	BP	e	cell surface receptor signaling pathway	24/769	212/32695	7.5e-07	n.a.	24	0.0089	0.00868	0.00887	Adgrl4, Anxa1, Cd151, Cd22, Cd274, Cd37, Cd44, Cd53, Cd63, Cd82, Cd86, Cd9, Cxcl13, Edn1, Edn3, Fcer1g, Fcgr1, Fcgr2b, Fcgr3, Lag3, Osmr, Tnfrsf1a, Tnfrsf1b, Upk1b
GO:0070374	BP	e	positive regulation of ERK1 and ERK2 cascade	24/769	233/32695	7.66e-07	n.a.	24	0.0091	0.00887	0.00906	C3, C5ar1, Ccl12, Ccl3, Ccl5, Ccl6, Ccl8, Ccl9, Cd44, Cd74, Csf1r, Ddr2, Glipr2, Gpnmb, Havcr2, Icam1, Il1a, P2ry6, Pycard, Shc1, Tlr2, Tlr4, Trem2, Vegfa
GO:0006898	BP	e	receptor-mediated endocytosis	10/769	57/32695	7.78e-07	n.a.	10	0.00924	0.009	0.0092	Cd14, Cxcl16, Dab2, Fcgr1, Fcgr2b, Ifitm3, Micall1, Mrc1, Snx9, Tgfbr2
GO:0030593	BP	e	neutrophil chemotaxis	21/769	71/32695	8.05e-07	n.a.	21	0.00956	0.00932	0.00952	C5ar1, Ccl12, Ccl3, Ccl5, Ccl6, Ccl8, Ccl9, Csf3r, Cxcl10, Cxcl13, Cxcl5, Edn3, Fcer1g, Fcgr3, Itgam, Itgb2, Lgals3, Nckap1l, Pf4, Spp1, Vav1
GO:0045730	BP	e	respiratory burst	5/769	9/32695	8.28e-07	n.a.	5	0.00983	0.00958	0.00979	Cyba, Cybb, Ncf2, Ncf4, Slc11a1
GO:0043066	BP	e	negative regulation of apoptotic process	36/769	568/32695	8.33e-07	n.a.	36	0.00989	0.00964	0.00985	Aif1, Bcl2a1b, Bcl3, Btg2, Cd44, Cd74, Clec5a, Cryab, Csf1r, Ctsh, Dab2, Ddr2, Eif2ak2, Fam129b, Flna, Fn1, Hck, Ier3, Lgals3, Naip2, Nckap1l, Pdcd1, Pdpn, Ptgfr, Ptgs2, Serpinb9, Shc1, Smad6, Socs3, Spp1, Stat3, Stat5a, Tnfrsf18, Tnfrsf1a, Ucp2, Vegfa
GO:0006955	BP	e	immune response	43/769	256/32695	8.58e-07	n.a.	43	0.0102	0.00993	0.0101	B2m, Bmp6, Ccl12, Ccl28, Ccl3, Ccl5, Ccl6, Ccl8, Ccl9, Ccr5, Cd274, Cd74, Cd86, Cx3cr1, Cxcl10, Cxcl12, Cxcl13, Cxcl5, Fcgr2b, Fyb, H2-Aa, H2-Ab1, H2-D1, H2-Eb1, H2-K1, H2-M3, H2-T23, Hfe, Il18, Il1a, Irf8, Mr1, Oas2, Oasl2, Pf4, Serpinb9, Smad6, Tinagl1, Tlr7, Tnfrsf1b, Tnfsf10, Vav1, Vtn
GO:0045087	BP	e	innate immune response	68/769	346/32695	8.67e-07	n.a.	68	0.0103	0.01	0.0103	Aim2, Anxa1, Apobec3, Bst2, C1qa, C1qb, C1qc, C1s1, C2, C3, Cd14, Cd180, Cd84, Cfh, Clec5a, Csf1, Csf1r, Cyba, Cybb, Ddx58, Defb1, Dhx58, Eif2ak2, Fcer1g, Fcgr1, Fes, Havcr2, Hck, Ifih1, Ifit1, Ifit2, Ifit3, Ifitm1, Ifitm3, Iigp1, Irf1, Irf7, Irgm1, Irgm2, Isg20, Jchain, Lcn2, Lgals3, Ly86, Ly9, Lyn, Mr1, Mx1, Mx2, Naip2, Oas2, Oasl2, Parp14, Pglyrp1, Pycard, Rsad2, Serping1, Ssc5d, Tlr13, Tlr2, …
GO:0050766	BP	e	positive regulation of phagocytosis	9/769	45/32695	8.73e-07	n.a.	9	0.0104	0.0101	0.0103	C3, Cyba, Fcer1g, Fcgr1, Fcgr2b, Fcgr3, Pros1, Pycard, Slc11a1
GO:0007155	BP	e	cell adhesion	48/769	518/32695	8.9e-07	n.a.	48	0.0106	0.0103	0.0105	Cd22, Cd33, Cd44, Cd63, Cd84, Cd9, Cdh1, Cercam, Col18a1, Col6a1, Csf3r, Ctnnal1, Cx3cr1, Cyp1b1, Emilin1, Eng, F11r, Fblim1, Fermt3, Fes, Fn1, Gpnmb, Hapln2, Icam1, Itga5, Itgam, Itgax, Itgb2, Itgb5, Lgals3bp, Ly9, Mag, Mpzl3, Parvg, Pdpn, Pecam1, Podxl, Scarf2, Siglecf, Spp1, Stab1, Tgfbi, Thbs2, Tinagl1, Vcam1, Vtn, Vwf, Wisp1
GO:0032760	BP	e	positive regulation of tumor necrosis factor production	13/769	58/32695	9.2e-07	n.a.	13	0.0109	0.0107	0.0109	Ccl3, Ccr5, Cd14, Cyba, Fcer1g, H2-T23, Il18, Lgals9, Pf4, Pycard, Tlr2, Tlr4, Tnfrsf1a
GO:0071346	BP	e	cellular response to interferon-gamma	25/769	87/32695	9.3e-07	n.a.	25	0.011	0.0108	0.011	Capg, Ccl12, Ccl3, Ccl5, Ccl6, Ccl8, Ccl9, Cdc42ep2, Flnb, Gbp2, Gbp3, Gbp5, Gbp7, H2-Ab1, Irf8, Irgm1, Mrc1, Rab7b, Stat1, Stxbp2, Stxbp3, Tlr2, Tlr4, Vamp8, Vim
GO:0032496	BP	e	response to lipopolysaccharide	15/769	103/32695	9.33e-07	n.a.	15	0.0111	0.0108	0.011	Adm, Cxcl5, Eif2ak2, Irak3, Lgals9, Litaf, Mgst1, Ncf2, Nos3, Plcg2, Ptgfr, Ptgs2, Slc11a1, Stat1, Tlr4
GO:0007159	BP	e	leukocyte cell-cell adhesion	10/769	24/32695	9.46e-07	n.a.	10	0.0112	0.0109	0.0112	Ccl5, Fermt3, Icam1, Itga5, Itgam, Itgb2, Nt5e, Pecam1, Ptprc, Vcam1
GO:0048247	BP	e	lymphocyte chemotaxis	7/769	24/32695	9.46e-07	n.a.	7	0.0112	0.0109	0.0112	Ccl12, Ccl3, Ccl5, Ccl6, Ccl8, Ccl9, Cxcl16
GO:0002376	BP	e	immune system process	80/769	420/32695	9.76e-07	n.a.	80	0.0116	0.0113	0.0115	Aim2, Anxa1, Apobec3, B2m, Bst2, C1qa, C1qb, C1qc, C1s1, C2, C3, Cd14, Cd180, Cd74, Cd84, Cd86, Cfh, Clec5a, Csf1, Csf1r, Ddx58, Dhx58, Eif2ak2, Fcgr1, Gbp5, H2-Aa, H2-Ab1, H2-D1, H2-Eb1, H2-K1, H2-T23, Havcr2, Hck, Icosl, Ifi30, Ifih1, Ifit1, Ifit2, Ifit3, Ifitm1, Ifitm3, Iigp1, Il4ra, Inpp5d, Irf1, Irf7, Irgm1, Isg20, Lat2, Lcn2, Lgals3, Lgals9, Ly86, Ly9, Lyn, Mr1, Mx1, Naip2, Oas2, Oasl2, Par…
GO:0006954	BP	e	inflammatory response	48/769	303/32695	1.02e-06	n.a.	48	0.0121	0.0118	0.012	Aim2, Anxa1, Bmp6, C3, C3ar1, C5ar1, Ccl12, Ccl3, Ccl5, Ccl6, Ccl8, Ccl9, Ccr5, Cd14, Cd44, Crlf2, Csf1, Csf1r, Cxcl10, Cxcl13, Cxcl5, Cyba, Cybb, Ecm1, Gbp5, Havcr2, Hck, Il18, Il1a, Ly86, Lyn, Naip2, Nfe2l2, Pf4, Ptgfr, Ptgs2, Pycard, Slc11a1, Stab1, Stat3, Themis2, Tlr13, Tlr2, Tlr4, Tlr7, Tnfrsf1a, Tnfrsf1b, Zc3h12a
GO:0016525	BP	e	negative regulation of angiogenesis	14/769	88/32695	1.05e-06	n.a.	14	0.0125	0.0122	0.0125	Adamts1, Cx3cr1, Cxcl10, Dcn, Ecscr, Emilin1, Foxc1, Gpr4, Pf4, Serpinf1, Shc1, Stab1, Stat1, Thbs2
GO:0009617	BP	e	response to bacterium	36/769	177/32695	1.09e-06	n.a.	36	0.013	0.0126	0.0129	C3, Cav1, Cd14, Cd52, Cxcl10, Defb1, Dhx58, Fcgr1, Fcgr2b, Gbp2, Gbp5, Ifi204, Ifi44, Ifit1, Ifit3, Iigp1, Irf8, Irgm1, Irgm2, Isg15, Lcn2, Lrg1, Ly6a, Oas2, Pmp22, Psmb9, Pycard, Serpina3n, Serpinb9, Slc11a1, Slfn2, Stat1, Tlr2, Tlr4, Trim30a, Usp18
GO:0001525	BP	e	angiogenesis	31/769	239/32695	1.14e-06	n.a.	31	0.0136	0.0132	0.0135	Acvrl1, Ang, Anxa2, Apln, Apold1, Casp8, Cav1, Ccl12, Clic4, Col18a1, Cyp1b1, Ecm1, Ecscr, Eng, Flna, Fn1, Foxc1, Hmox1, Il18, Mmrn2, Nos3, Pecam1, Plau, Ptgs2, Ptprb, Rnf213, Shc1, Tal1, Tbx1, Vegfa, Zc3h12a
GO:0043065	BP	e	positive regulation of apoptotic process	30/769	329/32695	1.21e-06	n.a.	30	0.0143	0.014	0.0143	Adamtsl4, Adm, Aldh1a1, Aldh1a2, Anxa1, Anxa5, Bmp7, Casp12, Casp8, Cyp1b1, Eif2ak2, Hmox1, Ifit2, Il18, Inpp5d, Nos3, Nupr1, Pdcd1, Pla2g4a, Ptgs2, Pycard, Rassf2, S100b, Steap3, Tgm2, Tlr4, Tnfsf10, Tspo, Txnip, Uaca
GO:0030199	BP	e	collagen fibril organization	9/769	47/32695	1.29e-06	n.a.	9	0.0153	0.0149	0.0152	Anxa2, Col11a2, Col5a2, Cyp1b1, Ddr2, Foxc1, Lox, Lum, Vps33b
GO:0008285	BP	e	negative regulation of cell proliferation	32/769	379/32695	1.39e-06	n.a.	32	0.0166	0.0161	0.0165	Acvrl1, Adm, Aldh1a2, Bdkrb2, Bmp7, Btg2, Cav1, Cd37, Cd9, Csf1r, Cyp1b1, Eif2ak2, Fam129b, Hmox1, Ifitm3, Il1a, Inpp5d, Irf1, Lyn, Nos3, Pdpn, Pmp22, Ptges, Ptgs2, Runx1, Skap2, Slfn2, Smad6, Stat3, Tgfbr2, Tlr2, Tns2
GO:0010628	BP	e	positive regulation of gene expression	39/769	453/32695	1.42e-06	n.a.	39	0.0169	0.0164	0.0168	Aldh1a2, Atf3, Atoh8, Bmp7, Cav1, Ccl5, Ccr5, Cd44, Csf1, Ctsh, Ddx58, Emilin1, Eng, Fbln1, Fn1, Foxc1, Foxd1, Hfe, Il18, Il1a, Il2rg, Il33, Lcn2, Lgals9, Msn, Nfe2l2, Nos3, Pf4, Ptgfr, Serpinb9, Serpine1, Slc11a1, Stat3, Tlr2, Tlr4, Tnfrsf1a, Vegfa, Vim, Zc3h12a
GO:0045621	BP	e	positive regulation of lymphocyte differentiation	4/769	5/32695	1.49e-06	n.a.	4	0.0177	0.0172	0.0176	Il2rg, Inpp5d, Nckap1l, Stat5a
GO:0019885	BP	e	antigen processing and presentation of endogenous peptide antigen via MHC class I	4/769	5/32695	1.49e-06	n.a.	4	0.0177	0.0172	0.0176	B2m, Tap1, Tap2, Tapbp
GO:0001798	BP	e	positive regulation of type IIa hypersensitivity	4/769	5/32695	1.49e-06	n.a.	4	0.0177	0.0172	0.0176	C3, Fcer1g, Fcgr1, Fcgr3
GO:0007165	BP	e	signal transduction	64/769	1261/32695	1.49e-06	n.a.	64	0.0177	0.0173	0.0176	Acvrl1, Adgrl4, Anxa1, Apbb1ip, Apln, Arap3, Arhgap18, Arhgap29, Arhgap30, Bdkrb2, C3ar1, C5ar1, Ccr5, Cd274, Cd48, Cd74, Cd86, Cx3cr1, Ecm1, Fcer1g, Fyb, Gabra6, Gna15, Gng11, Gpnmb, Gpr160, Gpr182, Gpr34, Gpr4, Gpr84, Hcar1, Hcar2, Icosl, Irak3, Lsp1, Lyn, Nos3, P2rx4, P2ry6, Pdpn, Plce1, Plcg2, Plpp2, Plxnb3, Ptgfr, Rasa4, Rasal3, Rassf2, Rassf4, Rgl2, Rgl3, Rps6kb2, Shc1, Socs3, Stat1, Stat3,…
GO:0032728	BP	e	positive regulation of interferon-beta production	7/769	26/32695	1.73e-06	n.a.	7	0.0205	0.02	0.0204	Ddx58, Ifih1, Irf1, Irf7, Tlr2, Tlr4, Zc3hav1
GO:0007266	BP	e	Rho protein signal transduction	11/769	77/32695	1.85e-06	n.a.	11	0.022	0.0214	0.0218	Arhgdib, Cdc42ep1, Cdc42ep2, Cdc42ep5, Ctnnal1, Eps8l1, Pdpn, Pecam1, Rac2, Rhoc, Rhoj
GO:0010977	BP	e	negative regulation of neuron projection development	11/769	77/32695	1.85e-06	n.a.	11	0.022	0.0214	0.0218	B2m, Ctsz, Dab2, Efemp1, Flna, Gfap, H2-D1, H2-K1, Mag, Pmp22, Vim
GO:0002230	BP	e	positive regulation of defense response to virus by host	7/769	27/32695	2.28e-06	n.a.	7	0.0271	0.0264	0.0269	Aim2, Ccl5, Ddx58, Pycard, Stat1, Tmem173, Zc3h12a
GO:0048245	BP	e	eosinophil chemotaxis	6/769	18/32695	2.42e-06	n.a.	6	0.0287	0.028	0.0286	Ccl12, Ccl5, Ccl6, Ccl8, Ccl9, Lgals3
GO:0043547	BP	e	positive regulation of GTPase activity	15/769	149/32695	2.58e-06	n.a.	15	0.0306	0.0298	0.0304	Adap2, Arap3, Asap3, Ccl12, Ccl3, Ccl5, Ccl6, Ccl8, Ccl9, Dock8, F11r, Icam1, Rgl3, Snx9, Vav1
GO:0045944	BP	e	positive regulation of transcription by RNA polymerase II	54/769	1116/32695	2.72e-06	n.a.	54	0.0323	0.0315	0.0321	Acvrl1, Akna, Atf3, Bcl3, Bmp6, Bmp7, Ccl3, Cdk5rap3, Cebpd, Cytl1, Dcn, Ddx58, Edn1, Eng, Foxc1, Foxd1, Hcls1, Helz2, Hexb, Igf2, Il18, Il1a, Il33, Irf1, Irf7, Irf8, Jag1, Litaf, Lpin3, Lum, Maff, Mlxipl, Nfe2l2, Nkx2-9, Nr1h3, Pf4, Pou2f2, Rreb1, Runx1, Slc11a1, Sox13, Spi1, Stat1, Stat3, Stat5a, Tal1, Tbx1, Tlr2, Tlr4, Tmem173, Tnfrsf1a, Vegfa, Zc3h12a, Zic1
GO:0055072	BP	e	iron ion homeostasis	8/769	39/32695	2.91e-06	n.a.	8	0.0346	0.0337	0.0344	B2m, Bdh2, Hfe, Hmox1, Lcn2, Slc11a1, Steap3, Trf
GO:0006826	BP	e	iron ion transport	5/769	11/32695	2.92e-06	n.a.	5	0.0346	0.0338	0.0344	B2m, Fth1, Slc11a1, Steap3, Trf
GO:0035456	BP	e	response to interferon-beta	5/769	11/32695	2.92e-06	n.a.	5	0.0346	0.0338	0.0344	Bst2, Ifitm1, Ifitm3, Stat1, Xaf1
GO:0010466	BP	e	negative regulation of peptidase activity	13/769	116/32695	3.63e-06	n.a.	13	0.0431	0.042	0.0428	A2m, Cast, Cd109, Cst7, Cstb, Ecm1, Itih2, Reck, Serpina3n, Serpinb1a, Serpine1, Serping1, Tfpi
GO:0071407	BP	e	cellular response to organic cyclic compound	9/769	53/32695	3.69e-06	n.a.	9	0.0438	0.0427	0.0435	Ccl12, Ccl5, Cyp1b1, Il18, P2ry6, Stat1, Stat3, Stat5a, Tmem173
GO:0042531	BP	e	positive regulation of tyrosine phosphorylation of STAT protein	9/769	54/32695	4.34e-06	n.a.	9	0.0515	0.0502	0.0511	Ccl5, Csf1r, Hcls1, Il18, Lyn, Parp14, Pecam1, Tnfrsf18, Tnfrsf1a
GO:0002250	BP	e	adaptive immune response	14/769	137/32695	4.64e-06	n.a.	14	0.0551	0.0537	0.0547	Anxa1, Cd74, Cd84, Cd86, H2-T23, Havcr2, Icosl, Jchain, Lat2, Ly9, Lyn, Tap1, Tap2, Unc93b1
GO:0032088	BP	e	negative regulation of NF-kappaB transcription factor activity	10/769	69/32695	4.75e-06	n.a.	10	0.0564	0.055	0.056	Aim2, Anxa4, Cdk5rap3, Cyp1b1, Dap, Havcr2, Irak3, Pycard, Trim21, Zc3h12a
GO:0002237	BP	e	response to molecule of bacterial origin	5/769	12/32695	4.91e-06	n.a.	5	0.0582	0.0568	0.0578	B2m, Cd14, H2-M3, Tap2, Tlr2
GO:0032715	BP	e	negative regulation of interleukin-6 production	7/769	30/32695	4.92e-06	n.a.	7	0.0584	0.057	0.058	Havcr2, Irak3, Nckap1l, Tlr4, Tnfrsf1a, Trim30a, Zc3h12a
GO:2000379	BP	e	positive regulation of reactive oxygen species metabolic process	7/769	30/32695	4.92e-06	n.a.	7	0.0584	0.057	0.058	Cyp1b1, Nfe2l2, Plau, Tgfbr2, Tspo, Xdh, Zc3h12a
GO:0001974	BP	e	blood vessel remodeling	8/769	42/32695	5.25e-06	n.a.	8	0.0624	0.0608	0.0619	Acvrl1, Flna, Foxc1, Jag1, Nos3, Tbx1, Tgm2, Vegfa
GO:0007229	BP	e	integrin-mediated signaling pathway	10/769	70/32695	5.43e-06	n.a.	10	0.0645	0.0628	0.0639	Fcer1g, Fermt3, Gab2, Itga5, Itgax, Itgb2, Itgb5, Plek, Tyrobp, Vav1
GO:0050830	BP	e	defense response to Gram-positive bacterium	12/769	103/32695	5.69e-06	n.a.	12	0.0676	0.0659	0.0671	C5ar1, Gbp2, Gbp3, Gbp7, H2-T23, Havcr2, Hck, Lyz2, Myo1f, Pglyrp1, Ssc5d, Tlr2
GO:0001937	BP	e	negative regulation of endothelial cell proliferation	7/769	31/32695	6.23e-06	n.a.	7	0.0739	0.0721	0.0733	Acvrl1, Atoh8, Cav1, Eng, Prl, Stat1, Xdh
GO:0007264	BP	e	small GTPase mediated signal transduction	11/769	87/32695	6.27e-06	n.a.	11	0.0744	0.0725	0.0738	Arhgap18, Arhgap30, Dock8, Hmox1, Plce1, Rac2, Rgl2, Rgl3, Rhoc, Rhoj, Vav1
GO:0042130	BP	e	negative regulation of T cell proliferation	8/769	43/32695	6.32e-06	n.a.	8	0.0751	0.0732	0.0745	Cd274, Cd86, Gpnmb, H2-Aa, H2-Ab1, H2-M3, Havcr2, Ptpn6
GO:0006879	BP	e	cellular iron ion homeostasis	8/769	43/32695	6.32e-06	n.a.	8	0.0751	0.0732	0.0745	Alas2, Bmp6, Cp, Fth1, Hfe, Hmox1, Slc11a1, Trf
GO:0006693	BP	e	prostaglandin metabolic process	6/769	21/32695	6.66e-06	n.a.	6	0.0791	0.0771	0.0784	Hpgds, Pdpn, Ptgds, Ptges, Ptgs2, Tnfrsf1a
GO:0045785	BP	e	positive regulation of cell adhesion	9/769	57/32695	6.89e-06	n.a.	9	0.0818	0.0798	0.0811	Apbb1ip, Ccl5, Cd63, Cxcl12, Dab2, Tgm2, Tnfrsf18, Vav1, Vegfa
GO:0090023	BP	e	positive regulation of neutrophil chemotaxis	6/769	22/32695	8.98e-06	n.a.	6	0.107	0.104	0.106	C3ar1, C5ar1, Cd74, Edn1, Nckap1l, Rac2
GO:0050731	BP	e	positive regulation of peptidyl-tyrosine phosphorylation	12/769	108/32695	9.33e-06	n.a.	12	0.111	0.108	0.11	Cd44, Cd74, Ehd4, Hcls1, Icam1, Igf2, Itga5, Lyn, Tlr4, Trem2, Vegfa, Vtn
GO:0035556	BP	e	intracellular signal transduction	25/769	397/32695	9.86e-06	n.a.	25	0.117	0.114	0.116	Adcy7, Arhgap29, Asb11, Dmpk, Edn1, Gab2, Hmox1, Inpp5d, Irak3, Lat2, Lyn, Myzap, Nrbp2, Oxsr1, Plce1, Plcg2, Plek, Ptpn6, Rasa4, Rps6kb2, Shc1, Socs3, Srpk3, Tns2, Vav1
GO:0071281	BP	e	cellular response to iron ion	4/769	7/32695	1e-05	n.a.	4	0.119	0.116	0.118	B2m, Bmp6, Hfe, Trf
GO:0001501	BP	e	skeletal system development	12/769	109/32695	1.03e-05	n.a.	12	0.122	0.119	0.121	Clec3b, Col11a2, Col5a2, Edn1, Foxc1, Hapln2, Hexa, Hexb, Lgals3, Rassf2, Runx1, Zic1
GO:0034097	BP	e	response to cytokine	9/769	60/32695	1.06e-05	n.a.	9	0.126	0.123	0.125	Aldh1a2, Ccl5, Cd274, Cxcl16, Osmr, Ptgs2, Serpina3n, Stat1, Stat3
GO:0098609	BP	e	cell-cell adhesion	12/769	110/32695	1.13e-05	n.a.	12	0.134	0.131	0.133	Cd53, Cdc42ep1, Cdh1, Cxcl12, Fblim1, Icam1, Itgam, Itgb2, Pdpn, Plxnb3, Shc1, Vcam1
GO:0030316	BP	e	osteoclast differentiation	7/769	34/32695	1.2e-05	n.a.	7	0.142	0.139	0.141	Csf1, Csf1r, Fcer1g, Gab2, Trem2, Trf, Tyrobp
GO:0006958	BP	e	complement activation, classical pathway	7/769	34/32695	1.2e-05	n.a.	7	0.142	0.139	0.141	C1qa, C1qb, C1qc, C1s1, C2, C3, Serping1
GO:0050728	BP	e	negative regulation of inflammatory response	11/769	93/32695	1.2e-05	n.a.	11	0.143	0.139	0.141	Cd44, Ier3, Lgals9, Nr1h3, Nt5e, Pglyrp1, Serpinf1, Socs3, Tnfrsf1a, Tnfrsf1b, Uaca
GO:0030855	BP	e	epithelial cell differentiation	8/769	47/32695	1.26e-05	n.a.	8	0.15	0.146	0.148	Bdh2, Bmp7, Cd63, F11r, Tagln2, Tbx1, Upk1b, Vegfa
GO:1900390	BP	e	regulation of iron ion import	3/769	3/32695	1.3e-05	n.a.	3	0.154	0.15	0.152	B2m, Hfe, Trf
GO:0002485	BP	e	antigen processing and presentation of endogenous peptide antigen via MHC class I via ER pathway, TAP-dependent	3/769	3/32695	1.3e-05	n.a.	3	0.154	0.15	0.152	H2-D1, H2-K1, Tap2
GO:0002481	BP	e	antigen processing and presentation of exogenous protein antigen via MHC class Ib, TAP-dependent	3/769	3/32695	1.3e-05	n.a.	3	0.154	0.15	0.152	B2m, H2-M3, Tap2
GO:0006915	BP	e	apoptotic process	31/769	559/32695	1.31e-05	n.a.	31	0.156	0.152	0.154	Adamtsl4, Aim2, C5ar1, Casp12, Casp8, Dab2, Dap, Dnase2a, Ecscr, Hcar2, Hmox1, Ifit2, Inpp5d, Irak3, Irf1, Lcn2, Lsp1, Naip2, Pdcd1, Pglyrp1, Pycard, Srgn, Steap3, Tgfbr2, Tmem173, Tnfrsf11b, Tnfrsf18, Tnfrsf1a, Tnfsf10, Xaf1, Zc3h12a
GO:0030336	BP	e	negative regulation of cell migration	12/769	112/32695	1.36e-05	n.a.	12	0.161	0.157	0.16	Acvrl1, Arap3, Arhgap4, Ccr5, Clic4, Cx3cr1, Cyp1b1, Eng, Jag1, Plxnb3, Reck, Serpine1
GO:0042327	BP	e	positive regulation of phosphorylation	7/769	35/32695	1.47e-05	n.a.	7	0.174	0.17	0.173	Ang, Apln, Ccl5, Lyn, Nckap1l, Trf, Vegfa
GO:0045648	BP	e	positive regulation of erythrocyte differentiation	6/769	24/32695	1.56e-05	n.a.	6	0.185	0.18	0.183	Inpp5d, Isg15, Nckap1l, Stat1, Stat3, Tal1
GO:0010575	BP	e	positive regulation of vascular endothelial growth factor production	6/769	24/32695	1.56e-05	n.a.	6	0.185	0.18	0.183	C3, C3ar1, C5ar1, Cyp1b1, Il1a, Ptgs2
GO:1904469	BP	e	positive regulation of tumor necrosis factor secretion	5/769	15/32695	1.75e-05	n.a.	5	0.208	0.203	0.206	Cd84, Ddx58, Havcr2, Ifih1, Tlr2
GO:0002755	BP	e	MyD88-dependent toll-like receptor signaling pathway	5/769	15/32695	1.75e-05	n.a.	5	0.208	0.203	0.206	Irak3, Tlr13, Tlr2, Tlr4, Tlr7
GO:0071360	BP	e	cellular response to exogenous dsRNA	5/769	15/32695	1.75e-05	n.a.	5	0.208	0.203	0.206	Cav1, Ddx58, Ifih1, Tmem173, Zc3hav1
GO:0042102	BP	e	positive regulation of T cell proliferation	9/769	64/32695	1.82e-05	n.a.	9	0.216	0.211	0.214	Aif1, Anxa1, Ccl5, Cd274, Cd86, Havcr2, Nckap1l, Ptprc, Vcam1
GO:0060326	BP	e	cell chemotaxis	10/769	80/32695	1.82e-05	n.a.	10	0.217	0.211	0.214	Bin2, Ccl28, Ccl6, Ccr5, Cx3cr1, Cxcl12, Eng, Plxnb3, Vcam1, Vegfa
GO:0006629	BP	e	lipid metabolic process	27/769	465/32695	1.89e-05	n.a.	27	0.225	0.219	0.223	A4galt, Apobr, Apod, Aspg, C3, Ch25h, Crot, Elovl1, Enpp6, Hpgds, Lpcat2, Lpin3, Mboat1, Npc2, Nr1h3, Oma1, Pla1a, Pla2g4a, Plce1, Plcg2, Pld4, Pnpla7, Ptgds, Ptges, Ptgs2, Slc16a11, Thrsp
GO:0001960	BP	e	negative regulation of cytokine-mediated signaling pathway	4/769	8/32695	1.97e-05	n.a.	4	0.234	0.228	0.232	Cav1, Ecm1, Irak3, Ptprc
GO:0042088	BP	e	T-helper 1 type immune response	4/769	8/32695	1.97e-05	n.a.	4	0.234	0.228	0.232	Bcl3, Il18, Il18bp, Vegfa
GO:0043304	BP	e	regulation of mast cell degranulation	4/769	8/32695	1.97e-05	n.a.	4	0.234	0.228	0.232	Fes, Lyn, Rac2, Stxbp2
GO:2000778	BP	e	positive regulation of interleukin-6 secretion	6/769	25/32695	2.01e-05	n.a.	6	0.238	0.232	0.236	Ddx58, Ifih1, Lgals9, Mbp, Pycard, Unc93b1
GO:0030099	BP	e	myeloid cell differentiation	6/769	25/32695	2.01e-05	n.a.	6	0.238	0.232	0.236	Clec5a, Dab2, Irf8, Pir, Runx1, Tal1
GO:0008283	BP	e	cell proliferation	17/769	220/32695	2.03e-05	n.a.	17	0.241	0.234	0.238	Appl2, Cd74, Cdk5rap3, Csf1, Csf1r, Foxc1, Il18, Mvp, Nupr1, Pdpn, Ptpn6, Stat3, Tbx1, Tgfbi, Tnfrsf1b, Vegfa, Vtn
GO:0014068	BP	e	positive regulation of phosphatidylinositol 3-kinase signaling	9/769	65/32695	2.07e-05	n.a.	9	0.246	0.24	0.243	Ccl5, Dcn, Hcls1, Il18, Myoc, Pik3ap1, Prr5l, Ptpn6, Rgl2
GO:0010951	BP	e	negative regulation of endopeptidase activity	10/769	83/32695	2.53e-05	n.a.	10	0.3	0.293	0.297	Reck, Renbp, Serpina3n, Serpinb1a, Serpinb6b, Serpinb9, Serpine1, Serpinf1, Serping1, Vtn
GO:0032757	BP	e	positive regulation of interleukin-8 production	6/769	26/32695	2.56e-05	n.a.	6	0.304	0.296	0.3	Ddx58, Il18, Serpine1, Tlr2, Tlr4, Tlr7
GO:0050718	BP	e	positive regulation of interleukin-1 beta secretion	6/769	26/32695	2.56e-05	n.a.	6	0.304	0.296	0.3	Aim2, Ccl3, Ccr5, Pycard, Tlr2, Tlr4
GO:0042104	BP	e	positive regulation of activated T cell proliferation	6/769	26/32695	2.56e-05	n.a.	6	0.304	0.296	0.3	Cd86, Icosl, Igf2, Il18, Pycard, Stat5a
GO:0050853	BP	e	B cell receptor signaling pathway	7/769	38/32695	2.59e-05	n.a.	7	0.308	0.3	0.304	Klhl6, Lat2, Lyn, Nckap1l, Plcg2, Ptpn6, Ptprc
GO:0032689	BP	e	negative regulation of interferon-gamma production	6/769	27/32695	3.22e-05	n.a.	6	0.383	0.373	0.378	Cd274, Havcr2, Il33, Lgals9, Pglyrp1, Tlr4
GO:0050732	BP	e	negative regulation of peptidyl-tyrosine phosphorylation	5/769	17/32695	3.48e-05	n.a.	5	0.413	0.402	0.408	Il18, Pecam1, Ptpn6, Ptprc, Samsn1
GO:0034138	BP	e	toll-like receptor 3 signaling pathway	4/769	9/32695	3.48e-05	n.a.	4	0.413	0.403	0.409	Cd86, Havcr2, Lgals9, Unc93b1
GO:0090197	BP	e	positive regulation of chemokine secretion	4/769	9/32695	3.48e-05	n.a.	4	0.413	0.403	0.409	Csf1r, Il33, Il4ra, Pycard
GO:0044406	BP	e	adhesion of symbiont to host	4/769	9/32695	3.48e-05	n.a.	4	0.413	0.403	0.409	Gbp2, Gbp3, Gbp7, Icam1
GO:0007204	BP	e	positive regulation of cytosolic calcium ion concentration	14/769	165/32695	3.87e-05	n.a.	14	0.459	0.448	0.454	Adm, Bdkrb2, C3ar1, C5ar1, Ccl28, Ccl3, Ccr5, Cd52, Cx3cr1, Cxcl13, Edn1, Itpr3, Plcg2, Ptgfr
GO:0043032	BP	e	positive regulation of macrophage activation	5/769	18/32695	4.72e-05	n.a.	5	0.56	0.546	0.554	Havcr2, Il33, Il4ra, Lgals9, Tlr4
GO:0008630	BP	e	intrinsic apoptotic signaling pathway in response to DNA damage	8/769	56/32695	4.73e-05	n.a.	8	0.562	0.548	0.555	Bcl2a1b, Hmox1, Ier3, Mlh1, Pycard, Tnfrsf1a, Tnfrsf1b, Uaca
GO:2001199	BP	e	negative regulation of dendritic cell differentiation	3/769	4/32695	5.09e-05	n.a.	3	0.605	0.589	0.597	H2-M3, Tmem176a, Tmem176b
GO:0001805	BP	e	positive regulation of type III hypersensitivity	3/769	4/32695	5.09e-05	n.a.	3	0.605	0.589	0.597	Fcer1g, Fcgr1, Fcgr3
GO:0071223	BP	e	cellular response to lipoteichoic acid	4/769	10/32695	5.7e-05	n.a.	4	0.676	0.659	0.668	Cd14, Tlr2, Tlr4, Trem2
GO:0042119	BP	e	neutrophil activation	4/769	10/32695	5.7e-05	n.a.	4	0.676	0.659	0.668	Ccl5, Cxcl5, Fcgr4, Il18
GO:0045646	BP	e	regulation of erythrocyte differentiation	4/769	10/32695	5.7e-05	n.a.	4	0.676	0.659	0.668	B2m, Hbb-b2, Lyn, Spi1
GO:0006956	BP	e	complement activation	4/769	10/32695	5.7e-05	n.a.	4	0.676	0.659	0.668	C2, C3, C4b, Cfh
GO:0042060	BP	e	wound healing	9/769	74/32695	5.94e-05	n.a.	9	0.705	0.687	0.696	Cav1, Eng, Fn1, Lox, Pecam1, Plau, Ppl, Serpine1, Slc11a1
GO:0001774	BP	e	microglial cell activation	5/769	19/32695	6.28e-05	n.a.	5	0.746	0.727	0.736	Aif1, Cx3cr1, Tlr2, Tlr4, Tlr7
GO:0090026	BP	e	positive regulation of monocyte chemotaxis	5/769	19/32695	6.28e-05	n.a.	5	0.746	0.727	0.736	Aif1, Ccl5, Cxcl10, Cxcl12, Serpine1
GO:0045429	BP	e	positive regulation of nitric oxide biosynthetic process	7/769	44/32695	6.96e-05	n.a.	7	0.826	0.806	0.816	Aif1, H2-M3, Icam1, Itgb2, Ptgs2, Tlr2, Tlr4
GO:0032720	BP	e	negative regulation of tumor necrosis factor production	7/769	45/32695	8.08e-05	n.a.	7	0.959	0.935	0.946	Gpnmb, Havcr2, Irak3, Tlr4, Trim30a, Tspo, Zc3h12a
GO:0090050	BP	e	positive regulation of cell migration involved in sprouting angiogenesis	5/769	20/32695	8.21e-05	n.a.	5	0.975	0.95	0.962	Anxa1, Hmox1, Ptgs2, Rhoj, Vegfa
GO:0045088	BP	e	regulation of innate immune response	4/769	11/32695	8.78e-05	n.a.	4	1	1	1	Dhx58, Irf1, Irf7, Myo1f
GO:0042554	BP	e	superoxide anion generation	4/769	11/32695	8.78e-05	n.a.	4	1	1	1	Cyba, Cybb, Edn1, Ncf2
GO:0035457	BP	e	cellular response to interferon-alpha	4/769	11/32695	8.78e-05	n.a.	4	1	1	1	Ifi204, Ifit1, Ifit2, Ifit3
GO:0050829	BP	e	defense response to Gram-negative bacterium	9/769	78/32695	9.01e-05	n.a.	9	1	1	1	Iigp1, Irgm2, Lyz2, Mr1, Pycard, Serpine1, Slc11a1, Ssc5d, Tlr4
GO:0001916	BP	e	positive regulation of T cell mediated cytotoxicity	7/769	46/32695	9.34e-05	n.a.	7	1	1	1	B2m, H2-D1, H2-K1, H2-M3, H2-T23, Ptprc, Tap2
GO:0007599	BP	e	hemostasis	7/769	46/32695	9.34e-05	n.a.	7	1	1	1	Anxa5, F13a1, Pros1, Serping1, Tfpi, Thbd, Vwf
GO:0051091	BP	e	positive regulation of DNA-binding transcription factor activity	11/769	116/32695	9.51e-05	n.a.	11	1	1	1	Anxa3, Cytl1, Ddr2, Ddx58, Edn1, Fcgr2b, Hcls1, Pycard, Tlr4, Tmem173, Trim21
GO:0071356	BP	e	cellular response to tumor necrosis factor	10/769	97/32695	9.75e-05	n.a.	10	1	1	1	Ccl12, Ccl3, Ccl5, Ccl6, Ccl8, Ccl9, Irf1, Nfe2l2, Pycard, Zc3h12a
GO:0001819	BP	e	positive regulation of cytokine production	6/769	33/32695	0.000107	n.a.	6	1	1	1	Dlk1, Eif2ak2, Havcr2, Il33, Lgals9, Slc11a1
GO:1901224	BP	e	positive regulation of NIK/NF-kappaB signaling	7/769	47/32695	0.000107	n.a.	7	1	1	1	Cd14, Eif2ak2, Havcr2, Il18, Tlr2, Tlr4, Tlr7
GO:0001666	BP	e	response to hypoxia	11/769	119/32695	0.00012	n.a.	11	1	1	1	Alas2, Ang, Cav1, Cryab, Edn1, Eng, Hmox1, Il18, Plau, Ucp2, Vegfa
GO:0010862	BP	e	positive regulation of pathway-restricted SMAD protein phosphorylation	7/769	48/32695	0.000123	n.a.	7	1	1	1	Acvrl1, Bmp6, Bmp7, Dab2, Eng, Hfe, Lgals9
GO:0035633	BP	e	maintenance of permeability of blood-brain barrier	3/769	5/32695	0.000125	n.a.	3	1	1	1	Bdkrb2, Mbp, Ptgs2
GO:0032732	BP	e	positive regulation of interleukin-1 production	3/769	5/32695	0.000125	n.a.	3	1	1	1	Havcr2, Lgals9, Tlr4
GO:2001181	BP	e	positive regulation of interleukin-10 secretion	3/769	5/32695	0.000125	n.a.	3	1	1	1	Cd274, Lgals9, Pycard
GO:0009115	BP	e	xanthine catabolic process	3/769	5/32695	0.000125	n.a.	3	1	1	1	Aox1, Aox3, Xdh
GO:0002138	BP	e	retinoic acid biosynthetic process	3/769	5/32695	0.000125	n.a.	3	1	1	1	Aldh1a1, Aldh1a2, Rbp1
GO:0002504	BP	e	antigen processing and presentation of peptide or polysaccharide antigen via MHC class II	3/769	5/32695	0.000125	n.a.	3	1	1	1	H2-Aa, H2-Ab1, H2-Eb1
GO:0003100	BP	e	regulation of systemic arterial blood pressure by endothelin	3/769	5/32695	0.000125	n.a.	3	1	1	1	Edn1, Edn3, Nos3
GO:0010572	BP	e	positive regulation of platelet activation	3/769	5/32695	0.000125	n.a.	3	1	1	1	Pdpn, Plek, Tlr4
GO:1990869	BP	e	cellular response to chemokine	3/769	5/32695	0.000125	n.a.	3	1	1	1	Dock8, Foxc1, Zc3h12a
GO:0033031	BP	e	positive regulation of neutrophil apoptotic process	3/769	5/32695	0.000125	n.a.	3	1	1	1	Anxa1, Cd44, Hcar2
GO:0048514	BP	e	blood vessel morphogenesis	6/769	34/32695	0.000127	n.a.	6	1	1	1	Acvrl1, Cyp1b1, Edn1, Lox, Tbx1, Vegfa
GO:0002474	BP	e	antigen processing and presentation of peptide antigen via MHC class I	6/769	34/32695	0.000127	n.a.	6	1	1	1	B2m, H2-D1, H2-K1, H2-M3, H2-T23, Mr1
GO:0035455	BP	e	response to interferon-alpha	4/769	12/32695	0.000129	n.a.	4	1	1	1	Bst2, Eif2ak2, Ifitm1, Ifitm3
GO:0044319	BP	e	wound healing, spreading of cells	4/769	12/32695	0.000129	n.a.	4	1	1	1	Cd151, Cd44, Flna, Pdpn
GO:0033627	BP	e	cell adhesion mediated by integrin	5/769	22/32695	0.000134	n.a.	5	1	1	1	Icam1, Itga5, Itgb2, Itgb5, Vtn
GO:0030031	BP	e	cell projection assembly	5/769	22/32695	0.000134	n.a.	5	1	1	1	Capg, Nckap1l, Parvg, Rac2, Rhoj
GO:0051092	BP	e	positive regulation of NF-kappaB transcription factor activity	11/769	121/32695	0.000139	n.a.	11	1	1	1	Aim2, Cd84, Eif2ak2, Icam1, Il18, Irak3, Itgb2, Pycard, Rab7b, Tlr2, Tlr4
GO:0030838	BP	e	positive regulation of actin filament polymerization	7/769	49/32695	0.000141	n.a.	7	1	1	1	Cdc42ep1, Cdc42ep2, Cdc42ep5, Icam1, Nckap1l, Pycard, Vasp
GO:0001934	BP	e	positive regulation of protein phosphorylation	15/769	210/32695	0.000148	n.a.	15	1	1	1	Aif1, Anxa2, C3, Cd74, Csf1r, Dab2, Eng, Fam129a, Gpnmb, Igf2, Irgm2, Lyn, Prr5l, Tbx1, Vegfa
GO:0042307	BP	e	positive regulation of protein import into nucleus	6/769	35/32695	0.000151	n.a.	6	1	1	1	Cdh1, Hcls1, Ptgs2, Uaca, Zc3h12a, Zic1
GO:0048260	BP	e	positive regulation of receptor-mediated endocytosis	5/769	23/32695	0.000168	n.a.	5	1	1	1	B2m, Hfe, Serpine1, Trf, Vtn
GO:0045669	BP	e	positive regulation of osteoblast differentiation	8/769	67/32695	0.000173	n.a.	8	1	1	1	Bmp6, Bmp7, Cebpd, Clic1, Ddr2, Ifi204, Jag1, Vegfa
GO:0045651	BP	e	positive regulation of macrophage differentiation	4/769	13/32695	0.000183	n.a.	4	1	1	1	Casp8, Csf1, Hcls1, Pf4
GO:0042535	BP	e	positive regulation of tumor necrosis factor biosynthetic process	4/769	13/32695	0.000183	n.a.	4	1	1	1	Cybb, Fcgr3, Tlr2, Tlr4
GO:0042532	BP	e	negative regulation of tyrosine phosphorylation of STAT protein	4/769	13/32695	0.000183	n.a.	4	1	1	1	Cav1, Irf1, Parp14, Socs3
GO:0045824	BP	e	negative regulation of innate immune response	4/769	13/32695	0.000183	n.a.	4	1	1	1	Dhx58, Havcr2, Irak3, Nmi
GO:0018108	BP	e	peptidyl-tyrosine phosphorylation	8/769	68/32695	0.000192	n.a.	8	1	1	1	Csf1r, Ddr2, Efemp1, Fes, Hck, Lyn, Ptpn6, Stat5a
GO:0048662	BP	e	negative regulation of smooth muscle cell proliferation	6/769	37/32695	0.000207	n.a.	6	1	1	1	Aif1, Ang, Apod, Cav1, Hmox1, Nos3
GO:0007596	BP	e	blood coagulation	8/769	69/32695	0.000213	n.a.	8	1	1	1	Anxa5, C3, F13a1, Pros1, Serping1, Tfpi, Thbd, Vwf
GO:0043536	BP	e	positive regulation of blood vessel endothelial cell migration	6/769	38/32695	0.000241	n.a.	6	1	1	1	Igf2, Nfe2l2, Nos3, P2rx4, Stat5a, Vegfa
GO:0031623	BP	e	receptor internalization	6/769	38/32695	0.000241	n.a.	6	1	1	1	Adm, Cav1, Cd9, Fcer1g, Itgb2, Snx1
GO:0050819	BP	e	negative regulation of coagulation	3/769	6/32695	0.000246	n.a.	3	1	1	1	Anxa5, Pros1, Thbd
GO:0043615	BP	e	astrocyte cell migration	3/769	6/32695	0.000246	n.a.	3	1	1	1	Ccl12, Ccl3, Hexb
GO:2000483	BP	e	negative regulation of interleukin-8 secretion	3/769	6/32695	0.000246	n.a.	3	1	1	1	Anxa1, Anxa4, Ssc5d
GO:1901098	BP	e	positive regulation of autophagosome maturation	3/769	6/32695	0.000246	n.a.	3	1	1	1	Fyco1, Irgm1, Irgm2
GO:0030203	BP	e	glycosaminoglycan metabolic process	3/769	6/32695	0.000246	n.a.	3	1	1	1	Foxc1, Hexa, Hexb
GO:0045629	BP	e	negative regulation of T-helper 2 cell differentiation	3/769	6/32695	0.000246	n.a.	3	1	1	1	Anxa1, Hlx, Irf1
GO:0034162	BP	e	toll-like receptor 9 signaling pathway	3/769	6/32695	0.000246	n.a.	3	1	1	1	Havcr2, Pik3ap1, Unc93b1
GO:0031394	BP	e	positive regulation of prostaglandin biosynthetic process	3/769	6/32695	0.000246	n.a.	3	1	1	1	Anxa1, Pla2g4a, Ptgs2
GO:1900426	BP	e	positive regulation of defense response to bacterium	3/769	6/32695	0.000246	n.a.	3	1	1	1	Cyba, Havcr2, Lgals9
GO:0060333	BP	e	interferon-gamma-mediated signaling pathway	3/769	6/32695	0.000246	n.a.	3	1	1	1	Irf1, Nmi, Stat1
GO:0045588	BP	e	positive regulation of gamma-delta T cell differentiation	3/769	6/32695	0.000246	n.a.	3	1	1	1	Nckap1l, Ptprc, Stat5a
GO:0030225	BP	e	macrophage differentiation	4/769	14/32695	0.000252	n.a.	4	1	1	1	Casp8, Csf1, Spi1, Vegfa
GO:0060337	BP	e	type I interferon signaling pathway	4/769	14/32695	0.000252	n.a.	4	1	1	1	Ifitm1, Ifitm3, Oas2, Stat1
GO:0048246	BP	e	macrophage chemotaxis	4/769	14/32695	0.000252	n.a.	4	1	1	1	Ccl12, Ccl3, Cx3cr1, Lgals3
GO:0030595	BP	e	leukocyte chemotaxis	5/769	25/32695	0.000255	n.a.	5	1	1	1	Ccl3, Cxcl10, Cxcl13, Cxcl5, Pf4
GO:0019915	BP	e	lipid storage	5/769	26/32695	0.00031	n.a.	5	1	1	1	Cav1, Hexa, Hexb, Plin2, Stat5a
GO:0043542	BP	e	endothelial cell migration	5/769	26/32695	0.00031	n.a.	5	1	1	1	Cyp1b1, Itgb2, Nos3, Pecam1, Vegfa
GO:0045780	BP	e	positive regulation of bone resorption	5/769	26/32695	0.00031	n.a.	5	1	1	1	Car2, Dlk1, Fcgr4, Spp1, Trf
GO:0045672	BP	e	positive regulation of osteoclast differentiation	5/769	26/32695	0.00031	n.a.	5	1	1	1	Car2, Ccl3, Ccl5, Csf1, Csf1r
GO:0014911	BP	e	positive regulation of smooth muscle cell migration	6/769	40/32695	0.000322	n.a.	6	1	1	1	Ccl5, Cyp1b1, Il18, P2ry6, Plau, Vtn
GO:0001569	BP	e	branching involved in blood vessel morphogenesis	6/769	40/32695	0.000322	n.a.	6	1	1	1	Cxcl12, Edn1, Eng, Tbx1, Tgfbr2, Vegfa
GO:0055114	BP	e	oxidation-reduction process	31/769	652/32695	0.000328	n.a.	31	1	1	1	Akr1b8, Aldh1a1, Aldh1a2, Aldh1l2, Aox1, Aox3, Bdh2, Cbr2, Ch25h, Cp, Cyba, Cybb, Cyp1b1, Cyp27a1, Cyp2j12, Dcxr, Ddo, Dnajc24, Fmo5, Fth1, Hmox1, Ifi30, Lox, Mgst1, Nos3, Pir, Ptges, Ptgs2, Qdpr, Steap3, Xdh
GO:0008217	BP	e	regulation of blood pressure	7/769	56/32695	0.00033	n.a.	7	1	1	1	Acvrl1, C3ar1, Cyba, Edn1, Hmox1, P2rx4, Ptgs2
GO:0042730	BP	e	fibrinolysis	4/769	15/32695	0.000337	n.a.	4	1	1	1	Anxa2, Plau, Pros1, Serping1
GO:2000249	BP	e	regulation of actin cytoskeleton reorganization	4/769	15/32695	0.000337	n.a.	4	1	1	1	Arhgdib, Csf1r, Ctsl, F11r
GO:0030195	BP	e	negative regulation of blood coagulation	4/769	15/32695	0.000337	n.a.	4	1	1	1	Anxa5, Pros1, Tfpi, Thbd
GO:0051260	BP	e	protein homooligomerization	15/769	227/32695	0.000343	n.a.	15	1	1	1	Anxa5, Cav1, Cdh1, Cryab, Ehd4, Entpd1, Fcer1g, Hmox1, Itpr3, P2rx4, Rnf213, Slc22a6, Stom, Tgm2, Vwf
GO:0043407	BP	e	negative regulation of MAP kinase activity	6/769	41/32695	0.00037	n.a.	6	1	1	1	Bmp7, Cav1, Cdk5rap3, Irak3, Lyn, Ptpn6
GO:0050679	BP	e	positive regulation of epithelial cell proliferation	8/769	75/32695	0.00038	n.a.	8	1	1	1	Bmp6, C5ar1, Ccl5, Grn, Prl, Tbx1, Tbx18, Vegfa
GO:0031622	BP	e	positive regulation of fever generation	3/769	7/32695	0.000423	n.a.	3	1	1	1	Ccl5, Ccr5, Ptgs2
GO:0032480	BP	e	negative regulation of type I interferon production	3/769	7/32695	0.000423	n.a.	3	1	1	1	Dhx58, Havcr2, Nmi
GO:0002819	BP	e	regulation of adaptive immune response	3/769	7/32695	0.000423	n.a.	3	1	1	1	Cd48, Irf1, Irf7
GO:0002438	BP	e	acute inflammatory response to antigenic stimulus	3/769	7/32695	0.000423	n.a.	3	1	1	1	Bdkrb2, Icam1, Serpinb9
GO:0045639	BP	e	positive regulation of myeloid cell differentiation	3/769	7/32695	0.000423	n.a.	3	1	1	1	Fes, Hbb-b2, Jag1
GO:0010718	BP	e	positive regulation of epithelial to mesenchymal transition	6/769	42/32695	0.000423	n.a.	6	1	1	1	Bmp7, Dab2, Foxc1, Glipr2, Pdpn, Tgfbr2
GO:0010614	BP	e	negative regulation of cardiac muscle hypertrophy	4/769	16/32695	0.000441	n.a.	4	1	1	1	Fbxo32, P2rx4, Tnfrsf1a, Tnfrsf1b
GO:0043306	BP	e	positive regulation of mast cell degranulation	4/769	16/32695	0.000441	n.a.	4	1	1	1	Fcer1g, Gab2, Il4ra, Stxbp2
GO:0060252	BP	e	positive regulation of glial cell proliferation	4/769	16/32695	0.000441	n.a.	4	1	1	1	Gfap, Lyn, Tspo, Vim
GO:0045807	BP	e	positive regulation of endocytosis	5/769	29/32695	0.000528	n.a.	5	1	1	1	Cav1, Cd14, Cd151, Cd63, Dab2
GO:1902895	BP	e	positive regulation of pri-miRNA transcription by RNA polymerase II	5/769	29/32695	0.000528	n.a.	5	1	1	1	Apln, Prl, Smad6, Spi1, Stat3
GO:2001202	BP	e	negative regulation of transforming growth factor-beta secretion	2/769	2/32695	0.000553	n.a.	2	1	1	1	Fbln1, Fn1
GO:2001186	BP	e	negative regulation of CD8-positive, alpha-beta T cell activation	2/769	2/32695	0.000553	n.a.	2	1	1	1	Cd274, Hfe
GO:2000098	BP	e	negative regulation of smooth muscle cell-matrix adhesion	2/769	2/32695	0.000553	n.a.	2	1	1	1	Apod, Serpine1
GO:0001869	BP	e	negative regulation of complement activation, lectin pathway	2/769	2/32695	0.000553	n.a.	2	1	1	1	A2m, Serping1
GO:0002764	BP	e	immune response-regulating signaling pathway	2/769	2/32695	0.000553	n.a.	2	1	1	1	Ctsh, Lat2
GO:0046967	BP	e	cytosol to ER transport	2/769	2/32695	0.000553	n.a.	2	1	1	1	Tap1, Tap2
GO:0002282	BP	e	microglial cell activation involved in immune response	2/769	2/32695	0.000553	n.a.	2	1	1	1	Cx3cr1, Il33
GO:2001189	BP	e	negative regulation of T cell activation via T cell receptor contact with antigen bound to MHC molecule on antigen presenting cell	2/769	2/32695	0.000553	n.a.	2	1	1	1	Havcr2, Lgals3
GO:0002489	BP	e	antigen processing and presentation of endogenous peptide antigen via MHC class Ib via ER pathway, TAP-dependent	2/769	2/32695	0.000553	n.a.	2	1	1	1	H2-T23, Tap2
GO:0034124	BP	e	regulation of MyD88-dependent toll-like receptor signaling pathway	2/769	2/32695	0.000553	n.a.	2	1	1	1	Irf1, Irf7
GO:0010819	BP	e	regulation of T cell chemotaxis	2/769	2/32695	0.000553	n.a.	2	1	1	1	Cxcl10, Lgals9
GO:1904685	BP	e	positive regulation of metalloendopeptidase activity	2/769	2/32695	0.000553	n.a.	2	1	1	1	Mbp, Stat3
GO:0002380	BP	e	immunoglobulin secretion involved in immune response	2/769	2/32695	0.000553	n.a.	2	1	1	1	Crlf2, Pou2f2
GO:1903974	BP	e	positive regulation of cellular response to macrophage colony-stimulating factor stimulus	2/769	2/32695	0.000553	n.a.	2	1	1	1	Tlr2, Tlr4
GO:1904237	BP	e	positive regulation of substrate-dependent cell migration, cell attachment to substrate	2/769	2/32695	0.000553	n.a.	2	1	1	1	Fbln1, Fn1
GO:0002588	BP	e	positive regulation of antigen processing and presentation of peptide antigen via MHC class II	2/769	2/32695	0.000553	n.a.	2	1	1	1	Pycard, Trem2
GO:1904434	BP	e	positive regulation of ferrous iron binding	2/769	2/32695	0.000553	n.a.	2	1	1	1	B2m, Hfe
GO:1904437	BP	e	positive regulation of transferrin receptor binding	2/769	2/32695	0.000553	n.a.	2	1	1	1	B2m, Hfe
GO:2000521	BP	e	negative regulation of immunological synapse formation	2/769	2/32695	0.000553	n.a.	2	1	1	1	Havcr2, Lgals3
GO:0002431	BP	e	Fc receptor mediated stimulatory signaling pathway	2/769	2/32695	0.000553	n.a.	2	1	1	1	Fcer1g, Lyn
GO:0003057	BP	e	regulation of the force of heart contraction by chemical signal	2/769	2/32695	0.000553	n.a.	2	1	1	1	Cav1, Nos3
GO:0002479	BP	e	antigen processing and presentation of exogenous peptide antigen via MHC class I, TAP-dependent	2/769	2/32695	0.000553	n.a.	2	1	1	1	Tap1, Tapbp
GO:0048839	BP	e	inner ear development	7/769	61/32695	0.000561	n.a.	7	1	1	1	C1qb, Cebpd, Cytl1, H2-K1, H2-T23, Ifi204, Jag1
GO:0045579	BP	e	positive regulation of B cell differentiation	4/769	17/32695	0.000566	n.a.	4	1	1	1	Il2rg, Inpp5d, Nckap1l, Stat5a
GO:0046697	BP	e	decidualization	4/769	17/32695	0.000566	n.a.	4	1	1	1	Cdh1, Ctsl, Pla2g4a, Ptgs2
GO:0097190	BP	e	apoptotic signaling pathway	6/769	45/32695	0.000619	n.a.	6	1	1	1	Casp8, Cav1, Dap, Ifi27, P2rx4, Uaca
GO:0050727	BP	e	regulation of inflammatory response	7/769	62/32695	0.00062	n.a.	7	1	1	1	Anxa1, Casp12, Lyn, Pik3ap1, Pycard, Tlr4, Usp18
GO:0060907	BP	e	positive regulation of macrophage cytokine production	3/769	8/32695	0.000664	n.a.	3	1	1	1	Cd74, Tlr2, Tlr4
GO:0031666	BP	e	positive regulation of lipopolysaccharide-mediated signaling pathway	3/769	8/32695	0.000664	n.a.	3	1	1	1	Bmp6, Cd180, Ly86
GO:0002821	BP	e	positive regulation of adaptive immune response	3/769	8/32695	0.000664	n.a.	3	1	1	1	Cd44, Cd74, Pycard
GO:0045627	BP	e	positive regulation of T-helper 1 cell differentiation	3/769	8/32695	0.000664	n.a.	3	1	1	1	Anxa1, Hlx, Irf1
GO:0045602	BP	e	negative regulation of endothelial cell differentiation	3/769	8/32695	0.000664	n.a.	3	1	1	1	Acvrl1, Jag1, Xdh
GO:0006691	BP	e	leukotriene metabolic process	3/769	8/32695	0.000664	n.a.	3	1	1	1	Alox5ap, Tlr2, Tlr4
GO:0050702	BP	e	interleukin-1 beta secretion	3/769	8/32695	0.000664	n.a.	3	1	1	1	Aim2, Gbp5, Tlr4
GO:0032494	BP	e	response to peptidoglycan	3/769	8/32695	0.000664	n.a.	3	1	1	1	C5ar1, Irak3, Tlr2
GO:0007160	BP	e	cell-matrix adhesion	8/769	82/32695	0.000696	n.a.	8	1	1	1	Cd63, Emilin1, Fn1, Itgb2, Itgb5, Sned1, Vcam1, Vtn
GO:0010759	BP	e	positive regulation of macrophage chemotaxis	4/769	18/32695	0.000714	n.a.	4	1	1	1	C3ar1, C5ar1, Ccl5, Csf1
GO:0090280	BP	e	positive regulation of calcium ion import	4/769	18/32695	0.000714	n.a.	4	1	1	1	Ccl12, Cxcl12, Lgals3, Serpine1
GO:0034113	BP	e	heterotypic cell-cell adhesion	4/769	18/32695	0.000714	n.a.	4	1	1	1	Itga5, Itgax, Itgb2, Ptprc
GO:0030218	BP	e	erythrocyte differentiation	6/769	47/32695	0.000784	n.a.	6	1	1	1	Alas2, Dnase2a, Hcls1, Lyn, Spi1, Tal1
GO:0031214	BP	e	biomineral tissue development	5/769	32/32695	0.000845	n.a.	5	1	1	1	Ddr2, Dmp1, Ecm1, Spp1, Srgn
GO:0071345	BP	e	cellular response to cytokine stimulus	5/769	32/32695	0.000845	n.a.	5	1	1	1	Csf1r, Hcls1, Stat1, Stat3, Stat5a
GO:0007595	BP	e	lactation	5/769	32/32695	0.000845	n.a.	5	1	1	1	Cav1, Prl, Stat5a, Vegfa, Xdh
GO:0010811	BP	e	positive regulation of cell-substrate adhesion	6/769	48/32695	0.000879	n.a.	6	1	1	1	Dmp1, Emilin1, Itga5, Mmrn2, Spp1, Vtn
GO:0050880	BP	e	regulation of blood vessel size	4/769	19/32695	0.000888	n.a.	4	1	1	1	Edn1, Edn3, Foxc1, Nos3
GO:0032930	BP	e	positive regulation of superoxide anion generation	4/769	19/32695	0.000888	n.a.	4	1	1	1	Cyba, Il18, Itgam, Itgb2
GO:0042310	BP	e	vasoconstriction	4/769	19/32695	0.000888	n.a.	4	1	1	1	Bdkrb2, Cav1, Edn1, Edn3
GO:0006508	BP	e	proteolysis	26/769	553/32695	0.000927	n.a.	26	1	1	1	Adamts1, C1s1, C2, Casp12, Casp8, Cpq, Cpxm2, Ctsc, Ctsd, Ctsh, Ctsk, Ctsl, Ctss, Ctsz, Htra3, Naalad2, Oma1, Pcolce, Plau, Psmb8, Psmb9, Scpep1, St14, Tinagl1, Tmprss5, Usp18
GO:0030833	BP	e	regulation of actin filament polymerization	5/769	33/32695	0.000977	n.a.	5	1	1	1	Arhgap18, Arpc1b, Eln, Eps8l1, Hcls1
GO:2001238	BP	e	positive regulation of extrinsic apoptotic signaling pathway	5/769	33/32695	0.000977	n.a.	5	1	1	1	Casp8, Cav1, Ptprc, Pycard, Tnfsf10
GO:0030853	BP	e	negative regulation of granulocyte differentiation	3/769	9/32695	0.000979	n.a.	3	1	1	1	C1qc, Inpp5d, Runx1
GO:0019953	BP	e	sexual reproduction	3/769	9/32695	0.000979	n.a.	3	1	1	1	Hexa, Hexb, Stat3
GO:0031274	BP	e	positive regulation of pseudopodium assembly	3/769	9/32695	0.000979	n.a.	3	1	1	1	Cdc42ep1, Cdc42ep2, Cdc42ep5
GO:0033622	BP	e	integrin activation	3/769	9/32695	0.000979	n.a.	3	1	1	1	Cxcl12, Fermt3, Fn1
GO:0050798	BP	e	activated T cell proliferation	3/769	9/32695	0.000979	n.a.	3	1	1	1	Itgam, Itgax, Itgb2
GO:0046598	BP	e	positive regulation of viral entry into host cell	3/769	9/32695	0.000979	n.a.	3	1	1	1	Cd74, Trim21, Trim30a
GO:0002690	BP	e	positive regulation of leukocyte chemotaxis	3/769	9/32695	0.000979	n.a.	3	1	1	1	Cxcl10, Edn3, Gpsm3
GO:2001046	BP	e	positive regulation of integrin-mediated signaling pathway	3/769	9/32695	0.000979	n.a.	3	1	1	1	Cd63, Dab2, Flna
GO:0031340	BP	e	positive regulation of vesicle fusion	3/769	9/32695	0.000979	n.a.	3	1	1	1	Anxa1, Anxa2, Pla2g4a
GO:1901223	BP	e	negative regulation of NIK/NF-kappaB signaling	4/769	20/32695	0.00109	n.a.	4	1	1	1	Litaf, Rassf2, Uaca, Zc3h12a
GO:0006801	BP	e	superoxide metabolic process	4/769	20/32695	0.00109	n.a.	4	1	1	1	Cyba, Cybb, Ncf2, Ncf4
GO:0001913	BP	e	T cell mediated cytotoxicity	4/769	20/32695	0.00109	n.a.	4	1	1	1	Ctsc, Ctsh, Hfe, Serpinb9
GO:1901741	BP	e	positive regulation of myoblast fusion	4/769	20/32695	0.00109	n.a.	4	1	1	1	Ccl8, Cd53, Cxcl12, Il4ra
GO:0022408	BP	e	negative regulation of cell-cell adhesion	4/769	20/32695	0.00109	n.a.	4	1	1	1	Cdh1, Jag1, Podxl, Vegfa
GO:0061025	BP	e	membrane fusion	4/769	20/32695	0.00109	n.a.	4	1	1	1	Mx1, Mx2, Vamp8, Vps33b
GO:0002218	BP	e	activation of innate immune response	4/769	20/32695	0.00109	n.a.	4	1	1	1	Aim2, Pycard, Tlr4, Tmem173
GO:0071560	BP	e	cellular response to transforming growth factor beta stimulus	6/769	50/32695	0.00109	n.a.	6	1	1	1	Acvrl1, Cav1, Dab2, Nos3, Runx1, Serpine1
GO:0030154	BP	e	cell differentiation	38/769	932/32695	0.0013	n.a.	38	1	1	1	Ang, Atoh8, Bhlhe41, Bmp6, Bmp7, Cav1, Csf1r, Dab2, Ddr2, Dlk1, Ecscr, Eya4, Fes, Flnb, Foxc1, Foxd1, Hck, Hlx, Kazald1, Lgals3, Lyn, Mgp, Nr1h3, Pmp22, Psmb8, Ptpn6, Robo3, Slfn5, Spi1, Srpk3, Tal1, Tbx18, Tgfbr2, Tmem176b, Vamp5, Vegfa, Zc3h12a, Zic1
GO:0051899	BP	e	membrane depolarization	4/769	21/32695	0.00132	n.a.	4	1	1	1	Cav1, Edn1, P2rx4, Shtn1
GO:0045954	BP	e	positive regulation of natural killer cell mediated cytotoxicity	4/769	21/32695	0.00132	n.a.	4	1	1	1	H2-M3, Lag3, Stat5a, Vav1
GO:0032753	BP	e	positive regulation of interleukin-4 production	4/769	21/32695	0.00132	n.a.	4	1	1	1	Fcer1g, H2-T23, Havcr2, Il33
GO:0006809	BP	e	nitric oxide biosynthetic process	3/769	10/32695	0.00137	n.a.	3	1	1	1	Cyp1b1, Nos3, P2rx4
GO:0048251	BP	e	elastic fiber assembly	3/769	10/32695	0.00137	n.a.	3	1	1	1	Efemp2, Emilin1, Lox
GO:0050707	BP	e	regulation of cytokine secretion	3/769	10/32695	0.00137	n.a.	3	1	1	1	Lyn, Tlr2, Tlr4
GO:0001542	BP	e	ovulation from ovarian follicle	3/769	10/32695	0.00137	n.a.	3	1	1	1	Adamts1, Nos3, Pla2g4a
GO:0002244	BP	e	hematopoietic progenitor cell differentiation	8/769	92/32695	0.00148	n.a.	8	1	1	1	Anln, Apobec3, Arl11, Cebpd, Pld4, Ptpn6, Ptprc, Samd9l
GO:0001933	BP	e	negative regulation of protein phosphorylation	8/769	92/32695	0.00148	n.a.	8	1	1	1	Cd109, Cdk5rap3, Fam129a, Fbln1, Lyn, Prr5l, Xdh, Zc3h12a
GO:0002687	BP	e	positive regulation of leukocyte migration	4/769	22/32695	0.00158	n.a.	4	1	1	1	Ccl12, Pecam1, Tlr2, Tnfrsf18
GO:0034612	BP	e	response to tumor necrosis factor	4/769	22/32695	0.00158	n.a.	4	1	1	1	Casp8, Ccl5, Cd14, Cxcl16
GO:0043123	BP	e	positive regulation of I-kappaB kinase/NF-kappaB signaling	8/769	93/32695	0.00159	n.a.	8	1	1	1	Casp8, Cd74, Il1a, S100a4, S100b, Tgm2, Tlr4, Zc3hav1
GO:0002291	BP	e	T cell activation via T cell receptor contact with antigen bound to MHC molecule on antigen presenting cell	2/769	3/32695	0.00163	n.a.	2	1	1	1	Apbb1ip, Icam1
GO:0002924	BP	e	negative regulation of humoral immune response mediated by circulating immunoglobulin	2/769	3/32695	0.00163	n.a.	2	1	1	1	Fcgr2b, Ptpn6
GO:0014889	BP	e	muscle atrophy	2/769	3/32695	0.00163	n.a.	2	1	1	1	Fbxo32, Gatm
GO:0045347	BP	e	negative regulation of MHC class II biosynthetic process	2/769	3/32695	0.00163	n.a.	2	1	1	1	Pf4, Spi1
GO:0050855	BP	e	regulation of B cell receptor signaling pathway	2/769	3/32695	0.00163	n.a.	2	1	1	1	Lyn, Ptprc
GO:0010866	BP	e	regulation of triglyceride biosynthetic process	2/769	3/32695	0.00163	n.a.	2	1	1	1	C3, Thrsp
GO:0003177	BP	e	pulmonary valve development	2/769	3/32695	0.00163	n.a.	2	1	1	1	Tnfrsf1a, Tnfrsf1b
GO:2000392	BP	e	regulation of lamellipodium morphogenesis	2/769	3/32695	0.00163	n.a.	2	1	1	1	Cd44, Pdpn
GO:1902339	BP	e	positive regulation of apoptotic process involved in morphogenesis	2/769	3/32695	0.00163	n.a.	2	1	1	1	Tnfrsf1a, Tnfrsf1b
GO:0032349	BP	e	positive regulation of aldosterone biosynthetic process	2/769	3/32695	0.00163	n.a.	2	1	1	1	Bmp6, Dab2
GO:0002826	BP	e	negative regulation of T-helper 1 type immune response	2/769	3/32695	0.00163	n.a.	2	1	1	1	Havcr2, Il33
GO:0003332	BP	e	negative regulation of extracellular matrix constituent secretion	2/769	3/32695	0.00163	n.a.	2	1	1	1	Tnfrsf1a, Tnfrsf1b
GO:2000860	BP	e	positive regulation of aldosterone secretion	2/769	3/32695	0.00163	n.a.	2	1	1	1	Bmp6, Dab2
GO:0045103	BP	e	intermediate filament-based process	2/769	3/32695	0.00163	n.a.	2	1	1	1	Gfap, Vim
GO:0001788	BP	e	antibody-dependent cellular cytotoxicity	2/769	3/32695	0.00163	n.a.	2	1	1	1	Fcgr1, Fcgr3
GO:0070487	BP	e	monocyte aggregation	2/769	3/32695	0.00163	n.a.	2	1	1	1	Bmp7, Cd44
GO:0002246	BP	e	wound healing involved in inflammatory response	2/769	3/32695	0.00163	n.a.	2	1	1	1	Cd44, Hmox1
GO:0032608	BP	e	interferon-beta production	2/769	3/32695	0.00163	n.a.	2	1	1	1	Irf7, Tmem173
GO:0038145	BP	e	macrophage colony-stimulating factor signaling pathway	2/769	3/32695	0.00163	n.a.	2	1	1	1	Csf1, Csf1r
GO:0005997	BP	e	xylulose metabolic process	2/769	3/32695	0.00163	n.a.	2	1	1	1	Cbr2, Dcxr
GO:1903237	BP	e	negative regulation of leukocyte tethering or rolling	2/769	3/32695	0.00163	n.a.	2	1	1	1	Ccl28, Cxcl12
GO:0090500	BP	e	endocardial cushion to mesenchymal transition	2/769	3/32695	0.00163	n.a.	2	1	1	1	Acvrl1, Eng
GO:0071727	BP	e	cellular response to triacyl bacterial lipopeptide	2/769	3/32695	0.00163	n.a.	2	1	1	1	Cd14, Tlr2
GO:0002757	BP	e	immune response-activating signal transduction	2/769	3/32695	0.00163	n.a.	2	1	1	1	Skap2, Zc3h12a
GO:0065003	BP	e	protein-containing complex assembly	7/769	73/32695	0.00165	n.a.	7	1	1	1	Cd74, Mgp, Nckap1l, Nupr1, Pf4, Tap2, Vamp8
GO:0070373	BP	e	negative regulation of ERK1 and ERK2 cascade	7/769	73/32695	0.00165	n.a.	7	1	1	1	Atf3, Cav1, Dab2, Emilin1, Fbln1, Lyn, Tlr4
GO:0010634	BP	e	positive regulation of epithelial cell migration	5/769	37/32695	0.00166	n.a.	5	1	1	1	Ctsh, Gab2, Glipr2, Rreb1, Tgfbr2
GO:0009725	BP	e	response to hormone	5/769	37/32695	0.00166	n.a.	5	1	1	1	Ang, Hcls1, Lox, Lyn, Nos3
GO:0006919	BP	e	activation of cysteine-type endopeptidase activity involved in apoptotic process	7/769	74/32695	0.00178	n.a.	7	1	1	1	Casp12, Casp8, Dap, Ifi27, Pycard, Stat1, Xdh
GO:0010629	BP	e	negative regulation of gene expression	17/769	310/32695	0.00179	n.a.	17	1	1	1	Acvrl1, Aif1, Apln, Atoh8, Cryab, Emilin1, Eng, Havcr2, Lgals9, Mir124a-1hg, Parp14, Serpine1, Serpinf1, Tnfrsf1a, Vegfa, Xdh, Zc3h12a
GO:0007519	BP	e	skeletal muscle tissue development	6/769	55/32695	0.00181	n.a.	6	1	1	1	Cav1, Eln, Flnb, Hlx, Srpk3, Vamp5
GO:0045893	BP	e	positive regulation of transcription, DNA-templated	27/769	613/32695	0.00182	n.a.	27	1	1	1	Acvrl1, Atoh8, Bcl3, Bmp7, Cd74, Cdh1, Dab2, Emilin1, Fam129b, Foxc1, Irf1, Irf7, Irf8, Mlxipl, Nfe2l2, Nr1h3, Pou2f2, Runx1, Shc1, Spi1, Spp1, Stat1, Stat3, Tal1, Tbx1, Trf, Zic1
GO:0051272	BP	e	positive regulation of cellular component movement	3/769	11/32695	0.00186	n.a.	3	1	1	1	Lyn, Pdpn, Vegfa
GO:0007035	BP	e	vacuolar acidification	3/769	11/32695	0.00186	n.a.	3	1	1	1	Clic4, Slc11a1, Tcirg1
GO:0010656	BP	e	negative regulation of muscle cell apoptotic process	3/769	11/32695	0.00186	n.a.	3	1	1	1	Cav1, Hmox1, Zc3h12a
GO:0002281	BP	e	macrophage activation involved in immune response	3/769	11/32695	0.00186	n.a.	3	1	1	1	Havcr2, Il33, Tyrobp
GO:0010744	BP	e	positive regulation of macrophage derived foam cell differentiation	3/769	11/32695	0.00186	n.a.	3	1	1	1	Csf1, Il18, Pf4
GO:0034142	BP	e	toll-like receptor 4 signaling pathway	3/769	11/32695	0.00186	n.a.	3	1	1	1	Cd14, Pik3ap1, Tlr4
GO:0035987	BP	e	endodermal cell differentiation	3/769	11/32695	0.00186	n.a.	3	1	1	1	Fn1, Itga5, Vtn
GO:0051901	BP	e	positive regulation of mitochondrial depolarization	3/769	11/32695	0.00186	n.a.	3	1	1	1	Dcn, Myoc, Tspo
GO:0060586	BP	e	multicellular organismal iron ion homeostasis	3/769	11/32695	0.00186	n.a.	3	1	1	1	Bmp6, Hfe, Slc11a1
GO:0032060	BP	e	bleb assembly	3/769	11/32695	0.00186	n.a.	3	1	1	1	Emp1, Emp3, Pmp22
GO:1901380	BP	e	negative regulation of potassium ion transmembrane transport	3/769	11/32695	0.00186	n.a.	3	1	1	1	Cav1, Kcne1l, Oxsr1
GO:0007259	BP	e	JAK-STAT cascade	4/769	23/32695	0.00188	n.a.	4	1	1	1	Socs3, Stat1, Stat3, Stat5a
GO:0042493	BP	e	response to drug	10/769	141/32695	0.00191	n.a.	10	1	1	1	Aldh1a1, Apobec1, Crot, Cybb, Igf2, Lcn2, Mgst1, Nckap1l, Stat1, Tgfbr2
GO:0030216	BP	e	keratinocyte differentiation	7/769	76/32695	0.00208	n.a.	7	1	1	1	Anxa1, Clic4, Ptgs2, Scel, St14, Tgm1, Txnip
GO:0042098	BP	e	T cell proliferation	4/769	24/32695	0.00222	n.a.	4	1	1	1	Cd151, Cxcl12, Msn, Ptprc
GO:0032733	BP	e	positive regulation of interleukin-10 production	4/769	24/32695	0.00222	n.a.	4	1	1	1	Cd83, Fcer1g, Tlr2, Tlr4
GO:0045089	BP	e	positive regulation of innate immune response	4/769	24/32695	0.00222	n.a.	4	1	1	1	Cd74, Gbp5, Havcr2, Lgals9
GO:0030155	BP	e	regulation of cell adhesion	5/769	40/32695	0.00237	n.a.	5	1	1	1	Fes, Icam1, Il18, Pdpn, Stat5a
GO:0030512	BP	e	negative regulation of transforming growth factor beta receptor signaling pathway	6/769	58/32695	0.00238	n.a.	6	1	1	1	Cav1, Cd109, Emilin1, Htra3, Smad6, Snx1
GO:0071375	BP	e	cellular response to peptide hormone stimulus	3/769	12/32695	0.00243	n.a.	3	1	1	1	Cav1, Il18, Irf1
GO:0071498	BP	e	cellular response to fluid shear stress	3/769	12/32695	0.00243	n.a.	3	1	1	1	Nfe2l2, Ptgs2, Spp1
GO:0031953	BP	e	negative regulation of protein autophosphorylation	3/769	12/32695	0.00243	n.a.	3	1	1	1	Eng, Mvp, Ptprc
GO:0045603	BP	e	positive regulation of endothelial cell differentiation	3/769	12/32695	0.00243	n.a.	3	1	1	1	Acvrl1, Atoh8, Bmp6
GO:0007252	BP	e	I-kappaB phosphorylation	3/769	12/32695	0.00243	n.a.	3	1	1	1	Tlr2, Tlr4, Tlr7
GO:0034101	BP	e	erythrocyte homeostasis	3/769	12/32695	0.00243	n.a.	3	1	1	1	Ampd3, Hmox1, Nckap1l
GO:0051926	BP	e	negative regulation of calcium ion transport	3/769	12/32695	0.00243	n.a.	3	1	1	1	Icam1, Nos3, Ptgs2
GO:0032700	BP	e	negative regulation of interleukin-17 production	3/769	12/32695	0.00243	n.a.	3	1	1	1	Nckap1l, Tlr2, Tlr4
GO:0070233	BP	e	negative regulation of T cell apoptotic process	3/769	12/32695	0.00243	n.a.	3	1	1	1	Ccl5, Dock8, Serpinb9
GO:0032735	BP	e	positive regulation of interleukin-12 production	4/769	25/32695	0.00259	n.a.	4	1	1	1	H2-M3, Irf8, Tlr2, Tlr4
GO:0033137	BP	e	negative regulation of peptidyl-serine phosphorylation	4/769	25/32695	0.00259	n.a.	4	1	1	1	Bdkrb2, Cav1, Mlxipl, Rassf2
GO:0048844	BP	e	artery morphogenesis	4/769	25/32695	0.00259	n.a.	4	1	1	1	Eng, Foxc1, Tbx1, Vegfa
GO:0070527	BP	e	platelet aggregation	4/769	25/32695	0.00259	n.a.	4	1	1	1	Fermt3, Plek, Ptpn6, Stxbp3
GO:0001558	BP	e	regulation of cell growth	6/769	59/32695	0.0026	n.a.	6	1	1	1	Cd44, Csf2rb, Htra3, Igfbp6, Kazald1, Wisp1
GO:0001817	BP	e	regulation of cytokine production	5/769	41/32695	0.00264	n.a.	5	1	1	1	Cd83, F11r, Icosl, Litaf, Lyn
GO:0009636	BP	e	response to toxic substance	6/769	60/32695	0.00283	n.a.	6	1	1	1	Ccl5, Cyp1b1, Eif2ak2, Mbp, Nupr1, Slc22a8
GO:0006006	BP	e	glucose metabolic process	6/769	61/32695	0.00307	n.a.	6	1	1	1	Apod, Cbr2, Dcxr, Hk2, Igf2, Oma1
GO:2000484	BP	e	positive regulation of interleukin-8 secretion	3/769	13/32695	0.00311	n.a.	3	1	1	1	Cd14, Pycard, Tlr2
GO:0070997	BP	e	neuron death	3/769	13/32695	0.00311	n.a.	3	1	1	1	Ccr5, Klk6, Plau
GO:0071404	BP	e	cellular response to low-density lipoprotein particle stimulus	3/769	13/32695	0.00311	n.a.	3	1	1	1	Cd9, Fcer1g, Itgb2
GO:0097320	BP	e	plasma membrane tubulation	3/769	13/32695	0.00311	n.a.	3	1	1	1	Bin2, Micall1, Snx9
GO:0060394	BP	e	negative regulation of pathway-restricted SMAD protein phosphorylation	3/769	13/32695	0.00311	n.a.	3	1	1	1	Emilin1, Eng, Smad6
GO:0042573	BP	e	retinoic acid metabolic process	3/769	13/32695	0.00311	n.a.	3	1	1	1	Aldh1a1, Aldh1a2, Rbp1
GO:0032743	BP	e	positive regulation of interleukin-2 production	3/769	13/32695	0.00311	n.a.	3	1	1	1	Anxa1, Cd83, Runx1
GO:1902219	BP	e	negative regulation of intrinsic apoptotic signaling pathway in response to osmotic stress	2/769	4/32695	0.00321	n.a.	2	1	1	1	Bdkrb2, Ptgs2
GO:0051142	BP	e	positive regulation of NK T cell proliferation	2/769	4/32695	0.00321	n.a.	2	1	1	1	Il18, Rasal3
GO:0003176	BP	e	aortic valve development	2/769	4/32695	0.00321	n.a.	2	1	1	1	Tnfrsf1a, Tnfrsf1b
GO:0002666	BP	e	positive regulation of T cell tolerance induction	2/769	4/32695	0.00321	n.a.	2	1	1	1	H2-M3, Tgfbr2
GO:0014005	BP	e	microglia development	2/769	4/32695	0.00321	n.a.	2	1	1	1	Itgam, Tlr2
GO:0070668	BP	e	positive regulation of mast cell proliferation	2/769	4/32695	0.00321	n.a.	2	1	1	1	Lyn, Stat5a
GO:0045123	BP	e	cellular extravasation	2/769	4/32695	0.00321	n.a.	2	1	1	1	Itgam, Itgb2
GO:0043378	BP	e	positive regulation of CD8-positive, alpha-beta T cell differentiation	2/769	4/32695	0.00321	n.a.	2	1	1	1	Nckap1l, Runx1
GO:0033629	BP	e	negative regulation of cell adhesion mediated by integrin	2/769	4/32695	0.00321	n.a.	2	1	1	1	Cyp1b1, Serpine1
GO:0045590	BP	e	negative regulation of regulatory T cell differentiation	2/769	4/32695	0.00321	n.a.	2	1	1	1	Cd44, Irf1
GO:0033026	BP	e	negative regulation of mast cell apoptotic process	2/769	4/32695	0.00321	n.a.	2	1	1	1	Fcer1g, Stat5a
GO:0003374	BP	e	dynamin family protein polymerization involved in mitochondrial fission	2/769	4/32695	0.00321	n.a.	2	1	1	1	Mx1, Mx2
GO:2000427	BP	e	positive regulation of apoptotic cell clearance	2/769	4/32695	0.00321	n.a.	2	1	1	1	C2, C3
GO:0043315	BP	e	positive regulation of neutrophil degranulation	2/769	4/32695	0.00321	n.a.	2	1	1	1	Itgam, Itgb2
GO:0043312	BP	e	neutrophil degranulation	2/769	4/32695	0.00321	n.a.	2	1	1	1	Anxa3, Myo1f
GO:0007589	BP	e	body fluid secretion	2/769	4/32695	0.00321	n.a.	2	1	1	1	Anxa2, Edn1
GO:0030886	BP	e	negative regulation of myeloid dendritic cell activation	2/769	4/32695	0.00321	n.a.	2	1	1	1	Cd37, Havcr2
GO:0045185	BP	e	maintenance of protein location	2/769	4/32695	0.00321	n.a.	2	1	1	1	Lgals3, Lgals9
GO:0060397	BP	e	JAK-STAT cascade involved in growth hormone signaling pathway	2/769	4/32695	0.00321	n.a.	2	1	1	1	Stat3, Stat5a
GO:0006907	BP	e	pinocytosis	2/769	4/32695	0.00321	n.a.	2	1	1	1	Dab2, Ehd4
GO:0070574	BP	e	cadmium ion transmembrane transport	2/769	4/32695	0.00321	n.a.	2	1	1	1	Slc11a1, Slc39a8
GO:1903278	BP	e	positive regulation of sodium ion export across plasma membrane	2/769	4/32695	0.00321	n.a.	2	1	1	1	Atp1b3, Fxyd1
GO:0032815	BP	e	negative regulation of natural killer cell activation	2/769	4/32695	0.00321	n.a.	2	1	1	1	Havcr2, Lgals9
GO:0010818	BP	e	T cell chemotaxis	2/769	4/32695	0.00321	n.a.	2	1	1	1	Cxcl10, Cxcl16
GO:1901532	BP	e	regulation of hematopoietic progenitor cell differentiation	2/769	4/32695	0.00321	n.a.	2	1	1	1	Eif2ak2, Vegfa
GO:0006549	BP	e	isoleucine metabolic process	2/769	4/32695	0.00321	n.a.	2	1	1	1	Bcat2, Stat5a
GO:2000255	BP	e	negative regulation of male germ cell proliferation	2/769	4/32695	0.00321	n.a.	2	1	1	1	Hpgds, Ptgds
GO:0032275	BP	e	luteinizing hormone secretion	2/769	4/32695	0.00321	n.a.	2	1	1	1	Cga, Foxd1
GO:0033634	BP	e	positive regulation of cell-cell adhesion mediated by integrin	2/769	4/32695	0.00321	n.a.	2	1	1	1	Ccl5, Cxcl13
GO:0071726	BP	e	cellular response to diacyl bacterial lipopeptide	2/769	4/32695	0.00321	n.a.	2	1	1	1	Cd14, Tlr2
GO:0033030	BP	e	negative regulation of neutrophil apoptotic process	2/769	4/32695	0.00321	n.a.	2	1	1	1	Fcgr2b, Il18
GO:0014826	BP	e	vein smooth muscle contraction	2/769	4/32695	0.00321	n.a.	2	1	1	1	Edn1, Edn3
GO:0032497	BP	e	detection of lipopolysaccharide	2/769	4/32695	0.00321	n.a.	2	1	1	1	Tlr4, Trem2
GO:0002730	BP	e	regulation of dendritic cell cytokine production	2/769	4/32695	0.00321	n.a.	2	1	1	1	Tlr2, Tlr4
GO:0006600	BP	e	creatine metabolic process	2/769	4/32695	0.00321	n.a.	2	1	1	1	Gatm, Stat5a
GO:0051482	BP	e	positive regulation of cytosolic calcium ion concentration involved in phospholipase C-activating G-protein coupled signaling pathway	5/769	43/32695	0.00327	n.a.	5	1	1	1	C3ar1, Edn1, Gna15, Gpr4, Tgm2
GO:0006897	BP	e	endocytosis	11/769	179/32695	0.00356	n.a.	11	1	1	1	Asgr1, Cav1, Dab2, Dennd1c, Micall1, Mrc1, Mrc2, Rhoj, Snx1, Snx9, Wipf1
GO:0051930	BP	e	regulation of sensory perception of pain	5/769	44/32695	0.00361	n.a.	5	1	1	1	Ctss, Edn1, Fcgr4, Il1a, Tlr4
GO:0030968	BP	e	endoplasmic reticulum unfolded protein response	5/769	44/32695	0.00361	n.a.	5	1	1	1	Atf3, Casp12, Cdk5rap3, Eif2ak2, Nfe2l2
GO:0045907	BP	e	positive regulation of vasoconstriction	5/769	44/32695	0.00361	n.a.	5	1	1	1	Cav1, Icam1, Ptgs2, Shc1, Smad6
GO:0001946	BP	e	lymphangiogenesis	3/769	14/32695	0.00389	n.a.	3	1	1	1	Acvrl1, Pdpn, Vegfa
GO:0061014	BP	e	positive regulation of mRNA catabolic process	3/769	14/32695	0.00389	n.a.	3	1	1	1	Prr5l, Zc3h12a, Zc3hav1
GO:0043129	BP	e	surfactant homeostasis	3/769	14/32695	0.00389	n.a.	3	1	1	1	Ctsh, Pla2g4a, Vegfa
GO:0048545	BP	e	response to steroid hormone	3/769	14/32695	0.00389	n.a.	3	1	1	1	Dab2, Lox, Spp1
GO:0032461	BP	e	positive regulation of protein oligomerization	3/769	14/32695	0.00389	n.a.	3	1	1	1	Aim2, Jchain, Snx9
GO:0042552	BP	e	myelination	6/769	64/32695	0.00391	n.a.	6	1	1	1	Hexa, Hexb, Lgi4, Mall, Mbp, Pmp22
GO:0002092	BP	e	positive regulation of receptor internalization	4/769	28/32695	0.00397	n.a.	4	1	1	1	Cd63, Dab2, Plcg2, Vegfa
GO:0033209	BP	e	tumor necrosis factor-mediated signaling pathway	4/769	28/32695	0.00397	n.a.	4	1	1	1	Aim2, Pycard, Stat1, Tnfrsf1a
GO:0030324	BP	e	lung development	8/769	108/32695	0.00404	n.a.	8	1	1	1	Aldh1a2, Lox, Mgp, Nkx2-9, Nos3, Pdpn, Tgfbr2, Vegfa
GO:0001822	BP	e	kidney development	8/769	108/32695	0.00404	n.a.	8	1	1	1	Adamts1, Anxa4, Bmp6, Bmp7, Foxc1, Foxd1, Tns2, Vegfa
GO:0072659	BP	e	protein localization to plasma membrane	9/769	133/32695	0.00431	n.a.	9	1	1	1	Anxa2, Atp1b3, Cdh1, F11r, Fcer1g, Flna, Fyb, Myl12a, Tnfrsf1a
GO:0034260	BP	e	negative regulation of GTPase activity	4/769	29/32695	0.00452	n.a.	4	1	1	1	F11r, Pecam1, Plxnb3, Rasa4
GO:0006904	BP	e	vesicle docking involved in exocytosis	4/769	29/32695	0.00452	n.a.	4	1	1	1	Plek, Stxbp2, Stxbp3, Vps33b
GO:1905564	BP	e	positive regulation of vascular endothelial cell proliferation	3/769	15/32695	0.00477	n.a.	3	1	1	1	Apln, Igf2, Stat3
GO:0010469	BP	e	regulation of signaling receptor activity	3/769	15/32695	0.00477	n.a.	3	1	1	1	Cga, Plau, Serpine1
GO:0001886	BP	e	endothelial cell morphogenesis	3/769	15/32695	0.00477	n.a.	3	1	1	1	Clic4, Col18a1, Pecam1
GO:0003184	BP	e	pulmonary valve morphogenesis	3/769	15/32695	0.00477	n.a.	3	1	1	1	Jag1, Nos3, Smad6
GO:0051492	BP	e	regulation of stress fiber assembly	3/769	15/32695	0.00477	n.a.	3	1	1	1	Asap3, Fhod1, Myoc
GO:0050918	BP	e	positive chemotaxis	3/769	15/32695	0.00477	n.a.	3	1	1	1	Lgals3, Plxnb3, Vegfa
GO:0045779	BP	e	negative regulation of bone resorption	3/769	15/32695	0.00477	n.a.	3	1	1	1	Inpp5d, Tnfrsf11b, Vegfa
GO:0046426	BP	e	negative regulation of JAK-STAT cascade	3/769	15/32695	0.00477	n.a.	3	1	1	1	Bcl3, Cav1, Socs3
GO:0007162	BP	e	negative regulation of cell adhesion	5/769	47/32695	0.00482	n.a.	5	1	1	1	Acvrl1, Fbln1, Myo1f, Plxnb3, Podxl
GO:0048146	BP	e	positive regulation of fibroblast proliferation	6/769	67/32695	0.00491	n.a.	6	1	1	1	Anxa2, Cd74, Ddr2, Fbln1, Fn1, Serpine1
GO:0006869	BP	e	lipid transport	8/769	112/32695	0.00504	n.a.	8	1	1	1	Abca8a, Apobr, Apod, Cav1, Esyt1, Gltp, Pctp, Tspo
GO:0006811	BP	e	ion transport	25/769	582/32695	0.00509	n.a.	25	1	1	1	Atp1b3, Clic1, Clic4, Cp, Cybb, Fxyd1, Fxyd5, Gabra6, Hfe, Itpr3, Kcne1l, Lcn2, Nipal4, P2rx4, Slc11a1, Slc13a3, Slc22a8, Slc38a3, Slc39a8, Steap3, Tcn2, Tmem37, Tmem63a, Trf, Tspo
GO:0032456	BP	e	endocytic recycling	4/769	30/32695	0.00512	n.a.	4	1	1	1	Dennd1c, Ehd4, Fcgr2b, Micall1
GO:0042113	BP	e	B cell activation	4/769	30/32695	0.00512	n.a.	4	1	1	1	Cd86, Icosl, Lat2, Skap2
GO:0003148	BP	e	outflow tract septum morphogenesis	4/769	30/32695	0.00512	n.a.	4	1	1	1	Eng, Smad6, Tbx1, Tgfbr2
GO:0032355	BP	e	response to estradiol	4/769	30/32695	0.00512	n.a.	4	1	1	1	Grn, Nos3, Ptgfr, Stat3
GO:0002906	BP	e	negative regulation of mature B cell apoptotic process	2/769	5/32695	0.00527	n.a.	2	1	1	1	Cd44, Cd74
GO:0048550	BP	e	negative regulation of pinocytosis	2/769	5/32695	0.00527	n.a.	2	1	1	1	Cav1, Nr1h3
GO:0072656	BP	e	maintenance of protein location in mitochondrion	2/769	5/32695	0.00527	n.a.	2	1	1	1	Hk2, Tspo
GO:0034134	BP	e	toll-like receptor 2 signaling pathway	2/769	5/32695	0.00527	n.a.	2	1	1	1	Pik3ap1, Tlr2
GO:0097084	BP	e	vascular smooth muscle cell development	2/769	5/32695	0.00527	n.a.	2	1	1	1	Adm, Eng
GO:0060948	BP	e	cardiac vascular smooth muscle cell development	2/769	5/32695	0.00527	n.a.	2	1	1	1	Smad6, Vegfa
GO:0006573	BP	e	valine metabolic process	2/769	5/32695	0.00527	n.a.	2	1	1	1	Bcat2, Stat5a
GO:0035549	BP	e	positive regulation of interferon-beta secretion	2/769	5/32695	0.00527	n.a.	2	1	1	1	Ddx58, Ifih1
GO:0035754	BP	e	B cell chemotaxis	2/769	5/32695	0.00527	n.a.	2	1	1	1	Ch25h, Cxcl13
GO:0060023	BP	e	soft palate development	2/769	5/32695	0.00527	n.a.	2	1	1	1	Col11a2, Tbx1
GO:0002248	BP	e	connective tissue replacement involved in inflammatory response wound healing	2/769	5/32695	0.00527	n.a.	2	1	1	1	Clec10a, Il1a
GO:0097368	BP	e	establishment of Sertoli cell barrier	2/769	5/32695	0.00527	n.a.	2	1	1	1	Flna, Icam1
GO:0002283	BP	e	neutrophil activation involved in immune response	2/769	5/32695	0.00527	n.a.	2	1	1	1	Fcer1g, Tyrobp
GO:1905007	BP	e	positive regulation of epithelial to mesenchymal transition involved in endocardial cushion formation	2/769	5/32695	0.00527	n.a.	2	1	1	1	Eng, Tgfbr2
GO:0090330	BP	e	regulation of platelet aggregation	2/769	5/32695	0.00527	n.a.	2	1	1	1	Lyn, Vps33b
GO:2000110	BP	e	negative regulation of macrophage apoptotic process	2/769	5/32695	0.00527	n.a.	2	1	1	1	Ccl5, Ccr5
GO:0032623	BP	e	interleukin-2 production	2/769	5/32695	0.00527	n.a.	2	1	1	1	Fcer1g, Slc11a1
GO:0002322	BP	e	B cell proliferation involved in immune response	2/769	5/32695	0.00527	n.a.	2	1	1	1	Cd180, Tlr4
GO:0034123	BP	e	positive regulation of toll-like receptor signaling pathway	2/769	5/32695	0.00527	n.a.	2	1	1	1	Pik3ap1, Tlr2
GO:0045351	BP	e	type I interferon biosynthetic process	2/769	5/32695	0.00527	n.a.	2	1	1	1	Irf7, Irf9
GO:0001812	BP	e	positive regulation of type I hypersensitivity	2/769	5/32695	0.00527	n.a.	2	1	1	1	Fcer1g, Fcgr3
GO:0015746	BP	e	citrate transport	2/769	5/32695	0.00527	n.a.	2	1	1	1	Slc13a3, Slc13a4
GO:0030072	BP	e	peptide hormone secretion	2/769	5/32695	0.00527	n.a.	2	1	1	1	Edn1, Edn3
GO:0007044	BP	e	cell-substrate junction assembly	2/769	5/32695	0.00527	n.a.	2	1	1	1	Fn1, Itga5
GO:0071219	BP	e	cellular response to molecule of bacterial origin	2/769	5/32695	0.00527	n.a.	2	1	1	1	Cd14, Fcgr2b
GO:1902714	BP	e	negative regulation of interferon-gamma secretion	2/769	5/32695	0.00527	n.a.	2	1	1	1	Lgals9, Zc3h12a
GO:0010893	BP	e	positive regulation of steroid biosynthetic process	2/769	5/32695	0.00527	n.a.	2	1	1	1	Cga, Il1a
GO:0032020	BP	e	ISG15-protein conjugation	2/769	5/32695	0.00527	n.a.	2	1	1	1	Isg15, Ube2l6
GO:0045637	BP	e	regulation of myeloid cell differentiation	2/769	5/32695	0.00527	n.a.	2	1	1	1	Csf3r, Tal1
GO:0006633	BP	e	fatty acid biosynthetic process	6/769	68/32695	0.00528	n.a.	6	1	1	1	Elovl1, Hpgds, Nr1h3, Ptgds, Ptges, Ptgs2
GO:0042981	BP	e	regulation of apoptotic process	12/769	217/32695	0.00556	n.a.	12	1	1	1	Bcl3, Bmp6, Bmp7, Card10, Casp12, Casp8, Eif2ak2, Irak3, Pycard, Rassf2, Sdf2l1, Tnfrsf1a
GO:0042771	BP	e	intrinsic apoptotic signaling pathway in response to DNA damage by p53 class mediator	4/769	31/32695	0.00577	n.a.	4	1	1	1	Bcl3, Ifi204, Nupr1, Pycard
GO:0032967	BP	e	positive regulation of collagen biosynthetic process	4/769	31/32695	0.00577	n.a.	4	1	1	1	Eng, Il18, Serpine1, Vim
GO:0002476	BP	e	antigen processing and presentation of endogenous peptide antigen via MHC class Ib	4/769	31/32695	0.00577	n.a.	4	1	1	1	H2-D1, H2-K1, H2-M3, H2-T23
GO:0051279	BP	e	regulation of release of sequestered calcium ion into cytosol	3/769	16/32695	0.00577	n.a.	3	1	1	1	Cyba, Lyn, Ptpn6
GO:0045019	BP	e	negative regulation of nitric oxide biosynthetic process	3/769	16/32695	0.00577	n.a.	3	1	1	1	Cav1, Tspo, Zc3h12a
GO:1901381	BP	e	positive regulation of potassium ion transmembrane transport	3/769	16/32695	0.00577	n.a.	3	1	1	1	Edn3, Flna, Kcne1l
GO:0003429	BP	e	growth plate cartilage chondrocyte morphogenesis	3/769	16/32695	0.00577	n.a.	3	1	1	1	Col6a1, Col6a3, Vwa1
GO:0051592	BP	e	response to calcium ion	5/769	50/32695	0.00629	n.a.	5	1	1	1	Anxa5, Apobec1, Cav1, Itpr3, Pla2g4a
GO:0035690	BP	e	cellular response to drug	5/769	50/32695	0.00629	n.a.	5	1	1	1	Aim2, Nfe2l2, Ppp1r14a, Serpine1, Slamf8
GO:1900026	BP	e	positive regulation of substrate adhesion-dependent cell spreading	4/769	32/32695	0.00647	n.a.	4	1	1	1	Dab2, Flna, Myoc, Rreb1
GO:0045840	BP	e	positive regulation of mitotic nuclear division	4/769	32/32695	0.00647	n.a.	4	1	1	1	Edn1, Edn3, Igf2, Il1a
GO:0051216	BP	e	cartilage development	6/769	71/32695	0.00651	n.a.	6	1	1	1	Bmp6, Bmp7, Col11a2, Edn1, Mgp, Tgfbr2
GO:0016042	BP	e	lipid catabolic process	8/769	117/32695	0.00653	n.a.	8	1	1	1	Aspg, Enpp6, Pla1a, Pla2g4a, Plce1, Plcg2, Pld4, Pnpla7
GO:0007200	BP	e	phospholipase C-activating G-protein coupled receptor signaling pathway	5/769	51/32695	0.00684	n.a.	5	1	1	1	C3ar1, C5ar1, Gna15, Plce1, Tgm2
GO:0018149	BP	e	peptide cross-linking	5/769	51/32695	0.00684	n.a.	5	1	1	1	Anxa1, F13a1, Fn1, Tgm1, Tgm2
GO:0014002	BP	e	astrocyte development	3/769	17/32695	0.00689	n.a.	3	1	1	1	Gfap, Tlr4, Vim
GO:0031643	BP	e	positive regulation of myelination	3/769	17/32695	0.00689	n.a.	3	1	1	1	Mag, S100b, Trf
GO:0003180	BP	e	aortic valve morphogenesis	3/769	17/32695	0.00689	n.a.	3	1	1	1	Emilin1, Nos3, Smad6
GO:0034122	BP	e	negative regulation of toll-like receptor signaling pathway	3/769	17/32695	0.00689	n.a.	3	1	1	1	Irak3, Pik3ap1, Trim30a
GO:0002042	BP	e	cell migration involved in sprouting angiogenesis	3/769	17/32695	0.00689	n.a.	3	1	1	1	Clec14a, Mmrn2, Vegfa
GO:0008219	BP	e	cell death	4/769	33/32695	0.00723	n.a.	4	1	1	1	Emp1, Emp3, Hmox1, Pmp22
GO:0050776	BP	e	regulation of immune response	5/769	52/32695	0.00742	n.a.	5	1	1	1	Fcer1g, Fcgr1, Fcgr3, Icosl, Irf1
GO:0010757	BP	e	negative regulation of plasminogen activation	2/769	6/32695	0.00778	n.a.	2	1	1	1	Ctsz, Serpine1
GO:0061419	BP	e	positive regulation of transcription from RNA polymerase II promoter in response to hypoxia	2/769	6/32695	0.00778	n.a.	2	1	1	1	Nfe2l2, Vegfa
GO:0009168	BP	e	purine ribonucleoside monophosphate biosynthetic process	2/769	6/32695	0.00778	n.a.	2	1	1	1	Adssl1, Ampd3
GO:0061304	BP	e	retinal blood vessel morphogenesis	2/769	6/32695	0.00778	n.a.	2	1	1	1	Cyp1b1, Vegfa
GO:1905563	BP	e	negative regulation of vascular endothelial cell proliferation	2/769	6/32695	0.00778	n.a.	2	1	1	1	Ccl12, Dlk1
GO:0070723	BP	e	response to cholesterol	2/769	6/32695	0.00778	n.a.	2	1	1	1	Ccr5, Tgfbr2
GO:0006531	BP	e	aspartate metabolic process	2/769	6/32695	0.00778	n.a.	2	1	1	1	Adssl1, Ddo
GO:0070447	BP	e	positive regulation of oligodendrocyte progenitor proliferation	2/769	6/32695	0.00778	n.a.	2	1	1	1	Lyn, Trf
GO:0060662	BP	e	salivary gland cavitation	2/769	6/32695	0.00778	n.a.	2	1	1	1	Cdh1, Tgm2
GO:0071224	BP	e	cellular response to peptidoglycan	2/769	6/32695	0.00778	n.a.	2	1	1	1	Tlr2, Trem2
GO:0075044	BP	e	autophagy of host cells involved in interaction with symbiont	2/769	6/32695	0.00778	n.a.	2	1	1	1	Irgm1, Irgm2
GO:0002606	BP	e	positive regulation of dendritic cell antigen processing and presentation	2/769	6/32695	0.00778	n.a.	2	1	1	1	Cd74, Slc11a1
GO:1900747	BP	e	negative regulation of vascular endothelial growth factor signaling pathway	2/769	6/32695	0.00778	n.a.	2	1	1	1	Dcn, Xdh
GO:0043372	BP	e	positive regulation of CD4-positive, alpha-beta T cell differentiation	2/769	6/32695	0.00778	n.a.	2	1	1	1	Cd83, Nckap1l
GO:0034144	BP	e	negative regulation of toll-like receptor 4 signaling pathway	2/769	6/32695	0.00778	n.a.	2	1	1	1	Lyn, Rab7b
GO:0016554	BP	e	cytidine to uridine editing	2/769	6/32695	0.00778	n.a.	2	1	1	1	Apobec1, Apobec3
GO:0033625	BP	e	positive regulation of integrin activation	2/769	6/32695	0.00778	n.a.	2	1	1	1	Cxcl13, Plek
GO:0060760	BP	e	positive regulation of response to cytokine stimulus	2/769	6/32695	0.00778	n.a.	2	1	1	1	Ddx58, Ifih1
GO:0003416	BP	e	endochondral bone growth	2/769	6/32695	0.00778	n.a.	2	1	1	1	Ddr2, Evc
GO:0045601	BP	e	regulation of endothelial cell differentiation	2/769	6/32695	0.00778	n.a.	2	1	1	1	Apold1, Vegfa
GO:0060708	BP	e	spongiotrophoblast differentiation	2/769	6/32695	0.00778	n.a.	2	1	1	1	Socs3, Xist
GO:0032400	BP	e	melanosome localization	2/769	6/32695	0.00778	n.a.	2	1	1	1	Mlph, Vps33b
GO:0006527	BP	e	arginine catabolic process	2/769	6/32695	0.00778	n.a.	2	1	1	1	Fah, Nos3
GO:1900227	BP	e	positive regulation of NLRP3 inflammasome complex assembly	2/769	6/32695	0.00778	n.a.	2	1	1	1	Gbp5, Tlr4
GO:0060056	BP	e	mammary gland involution	2/769	6/32695	0.00778	n.a.	2	1	1	1	Cav1, Stat5a
GO:0070234	BP	e	positive regulation of T cell apoptotic process	2/769	6/32695	0.00778	n.a.	2	1	1	1	Ccl5, Pdcd1
GO:0043305	BP	e	negative regulation of mast cell degranulation	2/769	6/32695	0.00778	n.a.	2	1	1	1	Cd84, Hmox1
GO:0060754	BP	e	positive regulation of mast cell chemotaxis	2/769	6/32695	0.00778	n.a.	2	1	1	1	Ccl5, Vegfa
GO:0032956	BP	e	regulation of actin cytoskeleton organization	6/769	74/32695	0.00795	n.a.	6	1	1	1	Arhgap18, Bst2, Il1a, Myo1f, Rhoc, Rhoj
GO:0050715	BP	e	positive regulation of cytokine secretion	4/769	34/32695	0.00804	n.a.	4	1	1	1	Cd14, Clec5a, Il1a, Tlr2
GO:0042267	BP	e	natural killer cell mediated cytotoxicity	3/769	18/32695	0.00813	n.a.	3	1	1	1	Hfe, Il18, Ptpn6
GO:0031589	BP	e	cell-substrate adhesion	3/769	18/32695	0.00813	n.a.	3	1	1	1	Itga5, Smad6, Vwf
GO:0007095	BP	e	mitotic G2 DNA damage checkpoint	3/769	18/32695	0.00813	n.a.	3	1	1	1	Cdk5rap3, D7Ertd443e, Ier3
GO:0003203	BP	e	endocardial cushion morphogenesis	3/769	18/32695	0.00813	n.a.	3	1	1	1	Acvrl1, Eng, Nos3
GO:0030889	BP	e	negative regulation of B cell proliferation	3/769	18/32695	0.00813	n.a.	3	1	1	1	Fcgr2b, Inpp5d, Lyn
GO:0042572	BP	e	retinol metabolic process	3/769	18/32695	0.00813	n.a.	3	1	1	1	Aldh1a1, Cyp1b1, Rbp1
GO:0031954	BP	e	positive regulation of protein autophosphorylation	3/769	18/32695	0.00813	n.a.	3	1	1	1	Gpnmb, Rassf2, Vegfa
GO:0035855	BP	e	megakaryocyte development	3/769	18/32695	0.00813	n.a.	3	1	1	1	Ptpn6, Tal1, Vps33b
GO:0060395	BP	e	SMAD protein signal transduction	6/769	75/32695	0.00847	n.a.	6	1	1	1	Atoh8, Bmp6, Bmp7, Hexa, Trf, Vim
GO:0045776	BP	e	negative regulation of blood pressure	4/769	35/32695	0.00892	n.a.	4	1	1	1	Apln, Bdkrb2, Nos3, Scpep1
GO:0040008	BP	e	regulation of growth	6/769	76/32695	0.00902	n.a.	6	1	1	1	E4f1, Mndal, Shc1, Socs3, Tgfbr2, Vegfa
GO:0007507	BP	e	heart development	13/769	250/32695	0.00918	n.a.	13	1	1	1	Adap2, Adm, Aldh1a2, Bicc1, Casp8, Edn1, Eng, Foxc1, Lox, Shc1, Tbx1, Tgfbr2, Vcam1
GO:0007565	BP	e	female pregnancy	5/769	55/32695	0.00938	n.a.	5	1	1	1	A2m, Lgals9, Prl, Stat5a, Thbd
GO:0030334	BP	e	regulation of cell migration	7/769	100/32695	0.00941	n.a.	7	1	1	1	Cxcl12, Ddx58, Edn3, Flna, Pecam1, Plxnb3, Rhoc
GO:0042789	BP	e	mRNA transcription by RNA polymerase II	3/769	19/32695	0.00948	n.a.	3	1	1	1	C5ar1, Flna, Stat3
GO:0051770	BP	e	positive regulation of nitric-oxide synthase biosynthetic process	3/769	19/32695	0.00948	n.a.	3	1	1	1	Stat1, Tlr2, Tlr4
GO:0002053	BP	e	positive regulation of mesenchymal cell proliferation	4/769	36/32695	0.00985	n.a.	4	1	1	1	Tbx1, Tbx18, Tgfbr2, Vegfa
GO:0048754	BP	e	branching morphogenesis of an epithelial tube	4/769	36/32695	0.00985	n.a.	4	1	1	1	Bmp7, Clic4, Mgp, Vegfa
GO:0030854	BP	e	positive regulation of granulocyte differentiation	2/769	7/32695	0.0107	n.a.	2	1	1	1	Hcls1, Runx1
GO:0002455	BP	e	humoral immune response mediated by circulating immunoglobulin	2/769	7/32695	0.0107	n.a.	2	1	1	1	Bcl3, H2-Ab1
GO:0042541	BP	e	hemoglobin biosynthetic process	2/769	7/32695	0.0107	n.a.	2	1	1	1	Alas2, Lyn
GO:0072655	BP	e	establishment of protein localization to mitochondrion	2/769	7/32695	0.0107	n.a.	2	1	1	1	Hk2, Tspo
GO:0050665	BP	e	hydrogen peroxide biosynthetic process	2/769	7/32695	0.0107	n.a.	2	1	1	1	Cyba, Cybb
GO:0048285	BP	e	organelle fission	2/769	7/32695	0.0107	n.a.	2	1	1	1	Mx1, Mx2
GO:0070542	BP	e	response to fatty acid	2/769	7/32695	0.0107	n.a.	2	1	1	1	Tlr2, Tlr4
GO:0006689	BP	e	ganglioside catabolic process	2/769	7/32695	0.0107	n.a.	2	1	1	1	Hexa, Hexb
GO:0072378	BP	e	blood coagulation, fibrin clot formation	2/769	7/32695	0.0107	n.a.	2	1	1	1	F13a1, Fbln1
GO:2000562	BP	e	negative regulation of CD4-positive, alpha-beta T cell proliferation	2/769	7/32695	0.0107	n.a.	2	1	1	1	Cd44, Lgals9
GO:0006559	BP	e	L-phenylalanine catabolic process	2/769	7/32695	0.0107	n.a.	2	1	1	1	Fah, Qdpr
GO:0060669	BP	e	embryonic placenta morphogenesis	2/769	7/32695	0.0107	n.a.	2	1	1	1	Igf2, Vcam1
GO:0034340	BP	e	response to type I interferon	2/769	7/32695	0.0107	n.a.	2	1	1	1	Isg15, Stat1
GO:0050688	BP	e	regulation of defense response to virus	2/769	7/32695	0.0107	n.a.	2	1	1	1	Apobec3, Cd37
GO:0019730	BP	e	antimicrobial humoral response	2/769	7/32695	0.0107	n.a.	2	1	1	1	Bcl3, Pglyrp1
GO:0090091	BP	e	positive regulation of extracellular matrix disassembly	2/769	7/32695	0.0107	n.a.	2	1	1	1	Ddr2, Pdpn
GO:0042904	BP	e	9-cis-retinoic acid biosynthetic process	2/769	7/32695	0.0107	n.a.	2	1	1	1	Aldh1a1, Aldh1a2
GO:0042118	BP	e	endothelial cell activation	2/769	7/32695	0.0107	n.a.	2	1	1	1	Acvrl1, Cxcl10
GO:1902966	BP	e	positive regulation of protein localization to early endosome	2/769	7/32695	0.0107	n.a.	2	1	1	1	Msn, Vegfa
GO:0070206	BP	e	protein trimerization	2/769	7/32695	0.0107	n.a.	2	1	1	1	Cd74, Trim21
GO:0002467	BP	e	germinal center formation	2/769	7/32695	0.0107	n.a.	2	1	1	1	Bcl3, Klhl6
GO:2000343	BP	e	positive regulation of chemokine (C-X-C motif) ligand 2 production	2/769	7/32695	0.0107	n.a.	2	1	1	1	Ccl5, Cd74
GO:0050869	BP	e	negative regulation of B cell activation	2/769	7/32695	0.0107	n.a.	2	1	1	1	Inpp5d, Samsn1
GO:0060335	BP	e	positive regulation of interferon-gamma-mediated signaling pathway	2/769	7/32695	0.0107	n.a.	2	1	1	1	Irgm1, Irgm2
GO:0010870	BP	e	positive regulation of receptor biosynthetic process	2/769	7/32695	0.0107	n.a.	2	1	1	1	Edn1, Nr1h3
GO:0045359	BP	e	positive regulation of interferon-beta biosynthetic process	2/769	7/32695	0.0107	n.a.	2	1	1	1	Tlr4, Tlr7
GO:0048842	BP	e	positive regulation of axon extension involved in axon guidance	2/769	7/32695	0.0107	n.a.	2	1	1	1	Cxcl12, Vegfa
GO:2000273	BP	e	positive regulation of signaling receptor activity	2/769	7/32695	0.0107	n.a.	2	1	1	1	Hfe, Tal1
GO:0002830	BP	e	positive regulation of type 2 immune response	2/769	7/32695	0.0107	n.a.	2	1	1	1	Cd74, Il33
GO:1900246	BP	e	positive regulation of RIG-I signaling pathway	2/769	7/32695	0.0107	n.a.	2	1	1	1	Dhx58, Zc3hav1
GO:0002693	BP	e	positive regulation of cellular extravasation	2/769	7/32695	0.0107	n.a.	2	1	1	1	Icam1, Pecam1
GO:0045630	BP	e	positive regulation of T-helper 2 cell differentiation	2/769	7/32695	0.0107	n.a.	2	1	1	1	Il18, Il4ra
GO:1900121	BP	e	negative regulation of receptor binding	2/769	7/32695	0.0107	n.a.	2	1	1	1	B2m, Hfe
GO:0043087	BP	e	regulation of GTPase activity	6/769	79/32695	0.0108	n.a.	6	1	1	1	Plxnb3, Pycard, Rasa4, Rasal3, Rasgrp3, Vav1
GO:0007154	BP	e	cell communication	4/769	37/32695	0.0108	n.a.	4	1	1	1	Ctsl, Gjb1, Gjb2, Jag1
GO:0097009	BP	e	energy homeostasis	4/769	37/32695	0.0108	n.a.	4	1	1	1	Ampd3, Mlxipl, Oma1, Stat3
GO:0070207	BP	e	protein homotrimerization	4/769	37/32695	0.0108	n.a.	4	1	1	1	Alox5ap, Emilin1, Lcn2, Mgst1
GO:0032874	BP	e	positive regulation of stress-activated MAPK cascade	3/769	20/32695	0.011	n.a.	3	1	1	1	Eif2ak2, Il1a, Tlr4
GO:2000573	BP	e	positive regulation of DNA biosynthetic process	3/769	20/32695	0.011	n.a.	3	1	1	1	C3ar1, Cyp1b1, Vegfa
GO:1900017	BP	e	positive regulation of cytokine production involved in inflammatory response	3/769	20/32695	0.011	n.a.	3	1	1	1	Gbp5, Gpsm3, Tlr4
GO:2000353	BP	e	positive regulation of endothelial cell apoptotic process	3/769	20/32695	0.011	n.a.	3	1	1	1	Ccl12, Col18a1, Ecscr
GO:0010942	BP	e	positive regulation of cell death	5/769	58/32695	0.0117	n.a.	5	1	1	1	Bmp7, Irf1, Ptgs2, Ucp2, Zc3h12a
GO:0045595	BP	e	regulation of cell differentiation	4/769	38/32695	0.0119	n.a.	4	1	1	1	Fes, Plekhb1, Runx1, Socs3
GO:0031532	BP	e	actin cytoskeleton reorganization	5/769	59/32695	0.0125	n.a.	5	1	1	1	Anxa1, Flna, Parvg, Plek, Shc1
GO:0035162	BP	e	embryonic hemopoiesis	3/769	21/32695	0.0126	n.a.	3	1	1	1	Runx1, Tal1, Tgfbr2
GO:0016601	BP	e	Rac protein signal transduction	3/769	21/32695	0.0126	n.a.	3	1	1	1	Aif1, Eps8l1, Rac2
GO:0030101	BP	e	natural killer cell activation	3/769	21/32695	0.0126	n.a.	3	1	1	1	Hfe, Il18, Itgb2
GO:0048255	BP	e	mRNA stabilization	3/769	21/32695	0.0126	n.a.	3	1	1	1	Apobec1, Slc11a1, Vegfa
GO:0030500	BP	e	regulation of bone mineralization	3/769	21/32695	0.0126	n.a.	3	1	1	1	Ddr2, Ecm1, Mgp
GO:0010596	BP	e	negative regulation of endothelial cell migration	3/769	21/32695	0.0126	n.a.	3	1	1	1	Acvrl1, Dcn, Serpinf1
GO:0030278	BP	e	regulation of ossification	3/769	21/32695	0.0126	n.a.	3	1	1	1	Csf1, Prl, Rsad2
GO:0048266	BP	e	behavioral response to pain	3/769	21/32695	0.0126	n.a.	3	1	1	1	Runx1, Tspo, Vwa1
GO:0006749	BP	e	glutathione metabolic process	4/769	39/32695	0.013	n.a.	4	1	1	1	Gstt2, Gstt3, Mgst1, Ptges
GO:0007169	BP	e	transmembrane receptor protein tyrosine kinase signaling pathway	7/769	107/32695	0.0133	n.a.	7	1	1	1	Csf1, Csf1r, Ddr2, Fes, Hck, Lyn, Shc1
GO:0007517	BP	e	muscle organ development	5/769	60/32695	0.0134	n.a.	5	1	1	1	Cryab, Srpk3, Tbx1, Vamp5, Zbtb42
GO:0006590	BP	e	thyroid hormone generation	2/769	8/32695	0.0141	n.a.	2	1	1	1	Cga, Cpq
GO:0045657	BP	e	positive regulation of monocyte differentiation	2/769	8/32695	0.0141	n.a.	2	1	1	1	Cd74, Csf1
GO:2000643	BP	e	positive regulation of early endosome to late endosome transport	2/769	8/32695	0.0141	n.a.	2	1	1	1	Dab2, Msn
GO:0015833	BP	e	peptide transport	2/769	8/32695	0.0141	n.a.	2	1	1	1	Tap1, Tap2
GO:1900027	BP	e	regulation of ruffle assembly	2/769	8/32695	0.0141	n.a.	2	1	1	1	Cav1, Icam1
GO:0035148	BP	e	tube formation	2/769	8/32695	0.0141	n.a.	2	1	1	1	Atoh8, Vegfa
GO:0042116	BP	e	macrophage activation	2/769	8/32695	0.0141	n.a.	2	1	1	1	Slc11a1, Tlr4
GO:0032488	BP	e	Cdc42 protein signal transduction	2/769	8/32695	0.0141	n.a.	2	1	1	1	Rhoj, Shtn1
GO:0043297	BP	e	apical junction assembly	2/769	8/32695	0.0141	n.a.	2	1	1	1	Cldn19, Rhoc
GO:0035988	BP	e	chondrocyte proliferation	2/769	8/32695	0.0141	n.a.	2	1	1	1	Ddr2, Grn
GO:1903589	BP	e	positive regulation of blood vessel endothelial cell proliferation involved in sprouting angiogenesis	2/769	8/32695	0.0141	n.a.	2	1	1	1	Hmox1, Vegfa
GO:0035239	BP	e	tube morphogenesis	2/769	8/32695	0.0141	n.a.	2	1	1	1	Bmp7, Pdpn
GO:0061299	BP	e	retina vasculature morphogenesis in camera-type eye	2/769	8/32695	0.0141	n.a.	2	1	1	1	Clic4, Rhoj
GO:0045084	BP	e	positive regulation of interleukin-12 biosynthetic process	2/769	8/32695	0.0141	n.a.	2	1	1	1	Irf1, Tlr4
GO:0031346	BP	e	positive regulation of cell projection organization	2/769	8/32695	0.0141	n.a.	2	1	1	1	Efemp1, Lcn2
GO:0071394	BP	e	cellular response to testosterone stimulus	2/769	8/32695	0.0141	n.a.	2	1	1	1	Msn, Spp1
GO:0072540	BP	e	T-helper 17 cell lineage commitment	2/769	8/32695	0.0141	n.a.	2	1	1	1	Ly9, Stat3
GO:0035912	BP	e	dorsal aorta morphogenesis	2/769	8/32695	0.0141	n.a.	2	1	1	1	Acvrl1, Eng
GO:1900122	BP	e	positive regulation of receptor binding	2/769	8/32695	0.0141	n.a.	2	1	1	1	B2m, Hfe
GO:0061635	BP	e	regulation of protein complex stability	2/769	8/32695	0.0141	n.a.	2	1	1	1	Irgm2, Tapbp
GO:0032611	BP	e	interleukin-1 beta production	2/769	8/32695	0.0141	n.a.	2	1	1	1	Mr1, Pycard
GO:0048016	BP	e	inositol phosphate-mediated signaling	2/769	8/32695	0.0141	n.a.	2	1	1	1	Edn1, Edn3
GO:0030574	BP	e	collagen catabolic process	3/769	22/32695	0.0143	n.a.	3	1	1	1	Ctsk, Ctss, Mrc2
GO:1900745	BP	e	positive regulation of p38MAPK cascade	3/769	22/32695	0.0143	n.a.	3	1	1	1	Vegfa, Xdh, Zc3h12a
GO:0031295	BP	e	T cell costimulation	3/769	22/32695	0.0143	n.a.	3	1	1	1	Cav1, Cd274, Cd86
GO:0050966	BP	e	detection of mechanical stimulus involved in sensory perception of pain	3/769	22/32695	0.0143	n.a.	3	1	1	1	Cxcl12, Il18, Tlr4
GO:0014032	BP	e	neural crest cell development	3/769	22/32695	0.0143	n.a.	3	1	1	1	Aldh1a2, Edn1, Foxc1
GO:0098586	BP	e	cellular response to virus	3/769	22/32695	0.0143	n.a.	3	1	1	1	Irgm2, Lgals9, Zc3h12a
GO:0022409	BP	e	positive regulation of cell-cell adhesion	3/769	22/32695	0.0143	n.a.	3	1	1	1	Ccr5, Cdh1, Tbx18
GO:0002028	BP	e	regulation of sodium ion transport	3/769	22/32695	0.0143	n.a.	3	1	1	1	Dmpk, Nos3, P2rx4
GO:0006471	BP	e	protein ADP-ribosylation	3/769	22/32695	0.0143	n.a.	3	1	1	1	Parp14, Parp3, Sirt4
GO:0006164	BP	e	purine nucleotide biosynthetic process	3/769	22/32695	0.0143	n.a.	3	1	1	1	Adssl1, Nt5e, Oasl2
GO:0007605	BP	e	sensory perception of sound	12/769	240/32695	0.0151	n.a.	12	1	1	1	Cdh1, Col11a2, Eya4, Gjb2, Hexa, Hexb, Icam1, Mbp, Mir124a-1hg, Slc52a3, Tbx1, Tbx18
GO:0000165	BP	e	MAPK cascade	6/769	86/32695	0.016	n.a.	6	1	1	1	Ccl12, Ccl5, Il18, Mbp, Shc1, Slc11a1
GO:0010460	BP	e	positive regulation of heart rate	3/769	23/32695	0.0162	n.a.	3	1	1	1	Adm, Edn1, Edn3
GO:0045453	BP	e	bone resorption	3/769	23/32695	0.0162	n.a.	3	1	1	1	Ctsk, Ctss, Rac2
GO:0002026	BP	e	regulation of the force of heart contraction	3/769	23/32695	0.0162	n.a.	3	1	1	1	Adm, Apln, Cav1
GO:0060441	BP	e	epithelial tube branching involved in lung morphogenesis	3/769	23/32695	0.0162	n.a.	3	1	1	1	Ctsd, Ctsl, Ctsz
GO:0050482	BP	e	arachidonic acid secretion	3/769	23/32695	0.0162	n.a.	3	1	1	1	Anxa1, Bdkrb2, Pla2g4a
GO:0045582	BP	e	positive regulation of T cell differentiation	3/769	23/32695	0.0162	n.a.	3	1	1	1	Cd74, H2-Aa, Ptprc
GO:1901215	BP	e	negative regulation of neuron death	5/769	63/32695	0.0163	n.a.	5	1	1	1	Ccl5, Gpnmb, Serpinf1, Stat3, Vegfa
GO:0040018	BP	e	positive regulation of multicellular organism growth	4/769	42/32695	0.0168	n.a.	4	1	1	1	Csf1, Igf2, Pls1, Stat5a
GO:0043124	BP	e	negative regulation of I-kappaB kinase/NF-kappaB signaling	4/769	42/32695	0.0168	n.a.	4	1	1	1	Casp8, Pycard, Stat1, Zc3h12a
GO:0043408	BP	e	regulation of MAPK cascade	5/769	64/32695	0.0173	n.a.	5	1	1	1	Bmp6, Bmp7, Myoc, Pik3ap1, Tlr13
GO:0061844	BP	e	antimicrobial humoral immune response mediated by antimicrobial peptide	5/769	64/32695	0.0173	n.a.	5	1	1	1	Cxcl10, Cxcl13, Cxcl5, Pf4, Pglyrp1
GO:0033138	BP	e	positive regulation of peptidyl-serine phosphorylation	6/769	88/32695	0.0177	n.a.	6	1	1	1	Cav1, Cd44, Hcls1, Irgm2, Ptgs2, Vegfa
GO:0006631	BP	e	fatty acid metabolic process	9/769	167/32695	0.0177	n.a.	9	1	1	1	C3, Crot, Elovl1, Hpgds, Lpin3, Ptgds, Ptges, Ptgs2, Stat5a
GO:0030856	BP	e	regulation of epithelial cell differentiation	2/769	9/32695	0.0178	n.a.	2	1	1	1	Stat5a, Xdh
GO:0031102	BP	e	neuron projection regeneration	2/769	9/32695	0.0178	n.a.	2	1	1	1	Adm, Gfap
GO:1900165	BP	e	negative regulation of interleukin-6 secretion	2/769	9/32695	0.0178	n.a.	2	1	1	1	Cd84, Zc3h12a
GO:2001056	BP	e	positive regulation of cysteine-type endopeptidase activity	2/769	9/32695	0.0178	n.a.	2	1	1	1	Aim2, Pycard
GO:0032308	BP	e	positive regulation of prostaglandin secretion	2/769	9/32695	0.0178	n.a.	2	1	1	1	Edn1, Il1a
GO:0008354	BP	e	germ cell migration	2/769	9/32695	0.0178	n.a.	2	1	1	1	Cxcl12, Foxc1
GO:0032736	BP	e	positive regulation of interleukin-13 production	2/769	9/32695	0.0178	n.a.	2	1	1	1	H2-T23, Il33
GO:0071901	BP	e	negative regulation of protein serine/threonine kinase activity	2/769	9/32695	0.0178	n.a.	2	1	1	1	Cdk5rap3, Pycard
GO:0061032	BP	e	visceral serous pericardium development	2/769	9/32695	0.0178	n.a.	2	1	1	1	Pdpn, Vcam1
GO:0010447	BP	e	response to acidic pH	2/769	9/32695	0.0178	n.a.	2	1	1	1	Ctss, Gpr4
GO:0045416	BP	e	positive regulation of interleukin-8 biosynthetic process	2/769	9/32695	0.0178	n.a.	2	1	1	1	Tlr4, Tlr7
GO:1902741	BP	e	positive regulation of interferon-alpha secretion	2/769	9/32695	0.0178	n.a.	2	1	1	1	Ddx58, Ifih1
GO:0051639	BP	e	actin filament network formation	2/769	9/32695	0.0178	n.a.	2	1	1	1	Lcp1, Pls1
GO:0048762	BP	e	mesenchymal cell differentiation	2/769	9/32695	0.0178	n.a.	2	1	1	1	Bmp7, Foxc1
GO:0032463	BP	e	negative regulation of protein homooligomerization	2/769	9/32695	0.0178	n.a.	2	1	1	1	Cryab, Lamp2
GO:0019941	BP	e	modification-dependent protein catabolic process	2/769	9/32695	0.0178	n.a.	2	1	1	1	Isg15, Ube2l6
GO:0032725	BP	e	positive regulation of granulocyte macrophage colony-stimulating factor production	2/769	9/32695	0.0178	n.a.	2	1	1	1	Ddx58, Il18
GO:2000008	BP	e	regulation of protein localization to cell surface	2/769	9/32695	0.0178	n.a.	2	1	1	1	Cdh1, Hfe
GO:0009404	BP	e	toxin metabolic process	2/769	9/32695	0.0178	n.a.	2	1	1	1	As3mt, Cyp1b1
GO:2000145	BP	e	regulation of cell motility	2/769	9/32695	0.0178	n.a.	2	1	1	1	Arhgap18, Fes
GO:0051781	BP	e	positive regulation of cell division	4/769	43/32695	0.0181	n.a.	4	1	1	1	Igf2, Il1a, Tal1, Vegfa
GO:0042474	BP	e	middle ear morphogenesis	3/769	24/32695	0.0182	n.a.	3	1	1	1	Edn1, Eya4, Tbx1
GO:0010499	BP	e	proteasomal ubiquitin-independent protein catabolic process	3/769	24/32695	0.0182	n.a.	3	1	1	1	Nfe2l2, Psmb8, Psmb9
GO:0016485	BP	e	protein processing	5/769	65/32695	0.0184	n.a.	5	1	1	1	Cpxm2, Ctsl, Ctss, Pcsk6, Srgn
GO:0003007	BP	e	heart morphogenesis	5/769	65/32695	0.0184	n.a.	5	1	1	1	Aldh1a2, Flna, Foxc1, Tbx1, Vegfa
GO:0001649	BP	e	osteoblast differentiation	5/769	65/32695	0.0184	n.a.	5	1	1	1	Bmp6, Dlk1, Igf2, Myoc, Spp1
GO:0007275	BP	e	multicellular organism development	38/769	1095/32695	0.019	n.a.	38	1	1	1	Ang, Apln, Atoh8, Bicc1, Bmp6, Bmp7, Cdh1, Cdh19, Csf1r, Dab2, Ddr2, Dnase2a, Ecscr, Eya4, Foxc1, Foxd1, Gatm, Ifi204, Jag1, Kazald1, Mgp, Nkx2-9, Nr1h3, Pdpn, Plekhb1, Prickle3, Robo3, Rreb1, Shtn1, Srpk3, Ssc5d, Tal1, Tbx1, Tbx18, Vamp5, Vegfa, Zc3h12a, Zic1
GO:0043154	BP	e	negative regulation of cysteine-type endopeptidase activity involved in apoptotic process	5/769	66/32695	0.0195	n.a.	5	1	1	1	Cd44, Cryab, Naip2, Ptgs2, Vegfa
GO:0043434	BP	e	response to peptide hormone	4/769	44/32695	0.0196	n.a.	4	1	1	1	Gatm, Serpina3n, Stat1, Stat5a
GO:0007157	BP	e	heterophilic cell-cell adhesion via plasma membrane cell adhesion molecules	4/769	44/32695	0.0196	n.a.	4	1	1	1	Itga5, Lgals9, Scarf2, Vcam1
GO:0032781	BP	e	positive regulation of ATPase activity	3/769	25/32695	0.0203	n.a.	3	1	1	1	Atp1b3, Dnajc24, Zc3hav1
GO:0010033	BP	e	response to organic substance	5/769	67/32695	0.0207	n.a.	5	1	1	1	Anxa5, Ctsc, Gatm, Pla2g4a, Spp1
GO:0010508	BP	e	positive regulation of autophagy	4/769	45/32695	0.0211	n.a.	4	1	1	1	Dcn, Irgm2, Trim21, Zc3h12a
GO:0010595	BP	e	positive regulation of endothelial cell migration	4/769	45/32695	0.0211	n.a.	4	1	1	1	Anxa3, Atoh8, Vegfa, Zc3h12a
GO:0030890	BP	e	positive regulation of B cell proliferation	4/769	45/32695	0.0211	n.a.	4	1	1	1	Cd74, Nckap1l, Ptprc, Tlr4
GO:0031529	BP	e	ruffle organization	2/769	10/32695	0.0219	n.a.	2	1	1	1	Csf1r, Plek
GO:0001775	BP	e	cell activation	2/769	10/32695	0.0219	n.a.	2	1	1	1	Fn1, Tlr2
GO:0001771	BP	e	immunological synapse formation	2/769	10/32695	0.0219	n.a.	2	1	1	1	Dock8, Msn
GO:0071639	BP	e	positive regulation of monocyte chemotactic protein-1 production	2/769	10/32695	0.0219	n.a.	2	1	1	1	Cd84, Il1a
GO:0006880	BP	e	intracellular sequestering of iron ion	2/769	10/32695	0.0219	n.a.	2	1	1	1	Fth1, Ftl1
GO:0008015	BP	e	blood circulation	2/769	10/32695	0.0219	n.a.	2	1	1	1	Acvrl1, Stat1
GO:0097028	BP	e	dendritic cell differentiation	2/769	10/32695	0.0219	n.a.	2	1	1	1	Lyn, Trem2
GO:0060020	BP	e	Bergmann glial cell differentiation	2/769	10/32695	0.0219	n.a.	2	1	1	1	Gfap, Vim
GO:0033628	BP	e	regulation of cell adhesion mediated by integrin	2/769	10/32695	0.0219	n.a.	2	1	1	1	Lyn, Plau
GO:0045591	BP	e	positive regulation of regulatory T cell differentiation	2/769	10/32695	0.0219	n.a.	2	1	1	1	H2-M3, Lgals9
GO:0030948	BP	e	negative regulation of vascular endothelial growth factor receptor signaling pathway	2/769	10/32695	0.0219	n.a.	2	1	1	1	Emilin1, Mmrn2
GO:0061099	BP	e	negative regulation of protein tyrosine kinase activity	2/769	10/32695	0.0219	n.a.	2	1	1	1	Cav1, Mvp
GO:0045906	BP	e	negative regulation of vasoconstriction	2/769	10/32695	0.0219	n.a.	2	1	1	1	Adm, Apln
GO:0097421	BP	e	liver regeneration	2/769	10/32695	0.0219	n.a.	2	1	1	1	Hmox1, Vtn
GO:0038084	BP	e	vascular endothelial growth factor signaling pathway	2/769	10/32695	0.0219	n.a.	2	1	1	1	Foxc1, Vegfa
GO:1902166	BP	e	negative regulation of intrinsic apoptotic signaling pathway in response to DNA damage by p53 class mediator	2/769	10/32695	0.0219	n.a.	2	1	1	1	Cd44, Cd74
GO:0060670	BP	e	branching involved in labyrinthine layer morphogenesis	2/769	10/32695	0.0219	n.a.	2	1	1	1	Adm, Socs3
GO:1900016	BP	e	negative regulation of cytokine production involved in inflammatory response	2/769	10/32695	0.0219	n.a.	2	1	1	1	Apod, Zc3h12a
GO:0008406	BP	e	gonad development	2/769	10/32695	0.0219	n.a.	2	1	1	1	Cga, Serpinb6b
GO:0002639	BP	e	positive regulation of immunoglobulin production	2/769	10/32695	0.0219	n.a.	2	1	1	1	Cd37, Il4ra
GO:0097242	BP	e	amyloid-beta clearance	2/769	10/32695	0.0219	n.a.	2	1	1	1	C3, Itgb2
GO:0060982	BP	e	coronary artery morphogenesis	2/769	10/32695	0.0219	n.a.	2	1	1	1	Tbx1, Vegfa
GO:0098742	BP	e	cell-cell adhesion via plasma-membrane adhesion molecules	2/769	10/32695	0.0219	n.a.	2	1	1	1	Mag, Pecam1
GO:0060710	BP	e	chorio-allantoic fusion	2/769	10/32695	0.0219	n.a.	2	1	1	1	Bmp7, Vcam1
GO:0006957	BP	e	complement activation, alternative pathway	2/769	10/32695	0.0219	n.a.	2	1	1	1	C3, Cfh
GO:0051001	BP	e	negative regulation of nitric-oxide synthase activity	2/769	10/32695	0.0219	n.a.	2	1	1	1	Cav1, Eng
GO:0007389	BP	e	pattern specification process	5/769	68/32695	0.022	n.a.	5	1	1	1	Acvrl1, Bmp7, Tbx1, Tgfbr2, Zic1
GO:0048738	BP	e	cardiac muscle tissue development	3/769	26/32695	0.0225	n.a.	3	1	1	1	Aldh1a2, Bmp7, Casp8
GO:0007613	BP	e	memory	6/769	93/32695	0.0226	n.a.	6	1	1	1	Cx3cr1, Igf2, Itga5, Itpr3, Ptgs2, S100b
GO:0071336	BP	e	regulation of hair follicle cell proliferation	1/769	1/32695	0.0235	n.a.	1	1	1	1	Runx1
GO:0033860	BP	e	regulation of NAD(P)H oxidase activity	1/769	1/32695	0.0235	n.a.	1	1	1	1	Slamf8
GO:0090341	BP	e	negative regulation of secretion of lysosomal enzymes	1/769	1/32695	0.0235	n.a.	1	1	1	1	Nr1h3
GO:0060262	BP	e	negative regulation of N-terminal protein palmitoylation	1/769	1/32695	0.0235	n.a.	1	1	1	1	Hhatl
GO:0072010	BP	e	glomerular epithelium development	1/769	1/32695	0.0235	n.a.	1	1	1	1	Foxc1
GO:0002335	BP	e	mature B cell differentiation	1/769	1/32695	0.0235	n.a.	1	1	1	1	Pou2f2
GO:0032431	BP	e	activation of phospholipase A2 activity	1/769	1/32695	0.0235	n.a.	1	1	1	1	Ang
GO:0032652	BP	e	regulation of interleukin-1 production	1/769	1/32695	0.0235	n.a.	1	1	1	1	Anxa1
GO:1901585	BP	e	regulation of acid-sensing ion channel activity	1/769	1/32695	0.0235	n.a.	1	1	1	1	Stom
GO:0033382	BP	e	maintenance of granzyme B location in T cell secretory granule	1/769	1/32695	0.0235	n.a.	1	1	1	1	Srgn
GO:0034178	BP	e	toll-like receptor 13 signaling pathway	1/769	1/32695	0.0235	n.a.	1	1	1	1	Tlr13
GO:1904141	BP	e	positive regulation of microglial cell migration	1/769	1/32695	0.0235	n.a.	1	1	1	1	Csf1
GO:0010925	BP	e	positive regulation of inositol-polyphosphate 5-phosphatase activity	1/769	1/32695	0.0235	n.a.	1	1	1	1	Plek
GO:1902278	BP	e	positive regulation of pancreatic amylase secretion	1/769	1/32695	0.0235	n.a.	1	1	1	1	Vamp8
GO:1905581	BP	e	positive regulation of low-density lipoprotein particle clearance	1/769	1/32695	0.0235	n.a.	1	1	1	1	Anxa2
GO:0002923	BP	e	regulation of humoral immune response mediated by circulating immunoglobulin	1/769	1/32695	0.0235	n.a.	1	1	1	1	Ptprc
GO:0014722	BP	e	regulation of skeletal muscle contraction by calcium ion signaling	1/769	1/32695	0.0235	n.a.	1	1	1	1	Dmpk
GO:0072076	BP	e	nephrogenic mesenchyme development	1/769	1/32695	0.0235	n.a.	1	1	1	1	Foxd1
GO:0002316	BP	e	follicular B cell differentiation	1/769	1/32695	0.0235	n.a.	1	1	1	1	Plcg2
GO:0038133	BP	e	ERBB2-ERBB3 signaling pathway	1/769	1/32695	0.0235	n.a.	1	1	1	1	Myoc
GO:1900085	BP	e	negative regulation of peptidyl-tyrosine autophosphorylation	1/769	1/32695	0.0235	n.a.	1	1	1	1	Cav1
GO:0090242	BP	e	retinoic acid receptor signaling pathway involved in somitogenesis	1/769	1/32695	0.0235	n.a.	1	1	1	1	Aldh1a2
GO:0001300	BP	e	chronological cell aging	1/769	1/32695	0.0235	n.a.	1	1	1	1	Eng
GO:1902624	BP	e	positive regulation of neutrophil migration	1/769	1/32695	0.0235	n.a.	1	1	1	1	Il1a
GO:1902623	BP	e	negative regulation of neutrophil migration	1/769	1/32695	0.0235	n.a.	1	1	1	1	Slamf8
GO:0045342	BP	e	MHC class II biosynthetic process	1/769	1/32695	0.0235	n.a.	1	1	1	1	Slc11a1
GO:0072616	BP	e	interleukin-18 secretion	1/769	1/32695	0.0235	n.a.	1	1	1	1	Gbp5
GO:2000509	BP	e	negative regulation of dendritic cell chemotaxis	1/769	1/32695	0.0235	n.a.	1	1	1	1	Slamf8
GO:2000502	BP	e	negative regulation of natural killer cell chemotaxis	1/769	1/32695	0.0235	n.a.	1	1	1	1	Ccl12
GO:0002575	BP	e	basophil chemotaxis	1/769	1/32695	0.0235	n.a.	1	1	1	1	Vegfa
GO:0050857	BP	e	positive regulation of antigen receptor-mediated signaling pathway	1/769	1/32695	0.0235	n.a.	1	1	1	1	Ptprc
GO:0046635	BP	e	positive regulation of alpha-beta T cell activation	1/769	1/32695	0.0235	n.a.	1	1	1	1	H2-Ab1
GO:1905898	BP	e	positive regulation of response to endoplasmic reticulum stress	1/769	1/32695	0.0235	n.a.	1	1	1	1	Fcgr2b
GO:0060305	BP	e	regulation of cell diameter	1/769	1/32695	0.0235	n.a.	1	1	1	1	Plek
GO:0045362	BP	e	positive regulation of interleukin-1 biosynthetic process	1/769	1/32695	0.0235	n.a.	1	1	1	1	Tlr4
GO:0032458	BP	e	slow endocytic recycling	1/769	1/32695	0.0235	n.a.	1	1	1	1	Micall1
GO:0002519	BP	e	natural killer cell tolerance induction	1/769	1/32695	0.0235	n.a.	1	1	1	1	Havcr2
GO:0035795	BP	e	negative regulation of mitochondrial membrane permeability	1/769	1/32695	0.0235	n.a.	1	1	1	1	Hk2
GO:0038178	BP	e	complement component C5a signaling pathway	1/769	1/32695	0.0235	n.a.	1	1	1	1	C5ar1
GO:0043322	BP	e	negative regulation of natural killer cell degranulation	1/769	1/32695	0.0235	n.a.	1	1	1	1	Lgals9
GO:0060183	BP	e	apelin receptor signaling pathway	1/769	1/32695	0.0235	n.a.	1	1	1	1	Apln
GO:2000097	BP	e	regulation of smooth muscle cell-matrix adhesion	1/769	1/32695	0.0235	n.a.	1	1	1	1	Plau
GO:2000545	BP	e	negative regulation of endothelial cell chemotaxis to fibroblast growth factor	1/769	1/32695	0.0235	n.a.	1	1	1	1	Cxcl13
GO:0015794	BP	e	glycerol-3-phosphate transmembrane transport	1/769	1/32695	0.0235	n.a.	1	1	1	1	Slc37a2
GO:0072213	BP	e	metanephric capsule development	1/769	1/32695	0.0235	n.a.	1	1	1	1	Foxd1
GO:0006530	BP	e	asparagine catabolic process	1/769	1/32695	0.0235	n.a.	1	1	1	1	Aspg
GO:0072376	BP	e	protein activation cascade	1/769	1/32695	0.0235	n.a.	1	1	1	1	Mvp
GO:1903769	BP	e	negative regulation of cell proliferation in bone marrow	1/769	1/32695	0.0235	n.a.	1	1	1	1	Lgals3
GO:0043244	BP	e	regulation of protein complex disassembly	1/769	1/32695	0.0235	n.a.	1	1	1	1	Irak3
GO:0002644	BP	e	negative regulation of tolerance induction	1/769	1/32695	0.0235	n.a.	1	1	1	1	Pdcd1
GO:0002645	BP	e	positive regulation of tolerance induction	1/769	1/32695	0.0235	n.a.	1	1	1	1	H2-M3
GO:0031664	BP	e	regulation of lipopolysaccharide-mediated signaling pathway	1/769	1/32695	0.0235	n.a.	1	1	1	1	Cd84
GO:0002881	BP	e	negative regulation of chronic inflammatory response to non-antigenic stimulus	1/769	1/32695	0.0235	n.a.	1	1	1	1	Cx3cr1
GO:0071471	BP	e	cellular response to non-ionic osmotic stress	1/769	1/32695	0.0235	n.a.	1	1	1	1	Ptgs2
GO:1904467	BP	e	regulation of tumor necrosis factor secretion	1/769	1/32695	0.0235	n.a.	1	1	1	1	Tlr4
GO:0070304	BP	e	positive regulation of stress-activated protein kinase signaling cascade	1/769	1/32695	0.0235	n.a.	1	1	1	1	Lyn
GO:0071656	BP	e	negative regulation of granulocyte colony-stimulating factor production	1/769	1/32695	0.0235	n.a.	1	1	1	1	Havcr2
GO:0060668	BP	e	regulation of branching involved in salivary gland morphogenesis by extracellular matrix-epithelial cell signaling	1/769	1/32695	0.0235	n.a.	1	1	1	1	Ntn4
GO:1905522	BP	e	negative regulation of macrophage migration	1/769	1/32695	0.0235	n.a.	1	1	1	1	Emilin1
GO:0071228	BP	e	cellular response to tumor cell	1/769	1/32695	0.0235	n.a.	1	1	1	1	Txnip
GO:0002663	BP	e	positive regulation of B cell tolerance induction	1/769	1/32695	0.0235	n.a.	1	1	1	1	Tgfbr2
GO:0002668	BP	e	negative regulation of T cell anergy	1/769	1/32695	0.0235	n.a.	1	1	1	1	Cd86
GO:1905317	BP	e	inferior endocardial cushion morphogenesis	1/769	1/32695	0.0235	n.a.	1	1	1	1	Tgfbr2
GO:1905316	BP	e	superior endocardial cushion morphogenesis	1/769	1/32695	0.0235	n.a.	1	1	1	1	Tgfbr2
GO:1905315	BP	e	cell proliferation involved in endocardial cushion morphogenesis	1/769	1/32695	0.0235	n.a.	1	1	1	1	Tgfbr2
GO:0010585	BP	e	glutamine secretion	1/769	1/32695	0.0235	n.a.	1	1	1	1	Slc1a5
GO:1904445	BP	e	negative regulation of establishment of Sertoli cell barrier	1/769	1/32695	0.0235	n.a.	1	1	1	1	Il1a
GO:0032759	BP	e	positive regulation of TRAIL production	1/769	1/32695	0.0235	n.a.	1	1	1	1	H2-T23
GO:0033668	BP	e	negative regulation by symbiont of host apoptotic process	1/769	1/32695	0.0235	n.a.	1	1	1	1	Serpinb9
GO:1903082	BP	e	positive regulation of C-C chemokine receptor CCR7 signaling pathway	1/769	1/32695	0.0235	n.a.	1	1	1	1	Trem2
GO:1990079	BP	e	cartilage homeostasis	1/769	1/32695	0.0235	n.a.	1	1	1	1	Cytl1
GO:1905662	BP	e	negative regulation of telomerase RNA reverse transcriptase activity	1/769	1/32695	0.0235	n.a.	1	1	1	1	Parp3
GO:0002845	BP	e	positive regulation of tolerance induction to tumor cell	1/769	1/32695	0.0235	n.a.	1	1	1	1	Cd274
GO:0002591	BP	e	positive regulation of antigen processing and presentation of peptide antigen via MHC class I	1/769	1/32695	0.0235	n.a.	1	1	1	1	Tap2
GO:1901565	BP	e	organonitrogen compound catabolic process	1/769	1/32695	0.0235	n.a.	1	1	1	1	Rida
GO:0043545	BP	e	molybdopterin cofactor metabolic process	1/769	1/32695	0.0235	n.a.	1	1	1	1	Mocos
GO:1903431	BP	e	positive regulation of cell maturation	1/769	1/32695	0.0235	n.a.	1	1	1	1	Runx1
GO:2000487	BP	e	positive regulation of glutamine transport	1/769	1/32695	0.0235	n.a.	1	1	1	1	Slc38a3
GO:0015868	BP	e	purine ribonucleotide transport	1/769	1/32695	0.0235	n.a.	1	1	1	1	Gjb1
GO:0060838	BP	e	lymphatic endothelial cell fate commitment	1/769	1/32695	0.0235	n.a.	1	1	1	1	Pdpn
GO:0002626	BP	e	negative regulation of T cell antigen processing and presentation	1/769	1/32695	0.0235	n.a.	1	1	1	1	Hfe
GO:0039528	BP	e	cytoplasmic pattern recognition receptor signaling pathway in response to virus	1/769	1/32695	0.0235	n.a.	1	1	1	1	Tmem173
GO:0002828	BP	e	regulation of type 2 immune response	1/769	1/32695	0.0235	n.a.	1	1	1	1	Ecm1
GO:0042905	BP	e	9-cis-retinoic acid metabolic process	1/769	1/32695	0.0235	n.a.	1	1	1	1	Aldh1a1
GO:0032712	BP	e	negative regulation of interleukin-3 production	1/769	1/32695	0.0235	n.a.	1	1	1	1	Havcr2
GO:0007039	BP	e	protein catabolic process in the vacuole	1/769	1/32695	0.0235	n.a.	1	1	1	1	Tcirg1
GO:1901624	BP	e	negative regulation of lymphocyte chemotaxis	1/769	1/32695	0.0235	n.a.	1	1	1	1	Padi2
GO:0010657	BP	e	muscle cell apoptotic process	1/769	1/32695	0.0235	n.a.	1	1	1	1	Dmpk
GO:0001576	BP	e	globoside biosynthetic process	1/769	1/32695	0.0235	n.a.	1	1	1	1	A4galt
GO:1904283	BP	e	negative regulation of antigen processing and presentation of endogenous peptide antigen via MHC class I	1/769	1/32695	0.0235	n.a.	1	1	1	1	Hfe
GO:0006867	BP	e	asparagine transport	1/769	1/32695	0.0235	n.a.	1	1	1	1	Slc38a3
GO:0006051	BP	e	N-acetylmannosamine metabolic process	1/769	1/32695	0.0235	n.a.	1	1	1	1	Renbp
GO:0002767	BP	e	immune response-inhibiting cell surface receptor signaling pathway	1/769	1/32695	0.0235	n.a.	1	1	1	1	H2-M3
GO:0061485	BP	e	memory T cell proliferation	1/769	1/32695	0.0235	n.a.	1	1	1	1	Dock8
GO:0070839	BP	e	divalent metal ion export	1/769	1/32695	0.0235	n.a.	1	1	1	1	Slc11a1
GO:1902721	BP	e	negative regulation of prolactin secretion	1/769	1/32695	0.0235	n.a.	1	1	1	1	Anxa5
GO:0070951	BP	e	regulation of neutrophil mediated killing of gram-negative bacterium	1/769	1/32695	0.0235	n.a.	1	1	1	1	Cxcl5
GO:0070489	BP	e	T cell aggregation	1/769	1/32695	0.0235	n.a.	1	1	1	1	Msn
GO:1904328	BP	e	regulation of myofibroblast contraction	1/769	1/32695	0.0235	n.a.	1	1	1	1	Pdpn
GO:1903803	BP	e	L-glutamine import across plasma membrane	1/769	1/32695	0.0235	n.a.	1	1	1	1	Slc1a5
GO:1900138	BP	e	negative regulation of phospholipase A2 activity	1/769	1/32695	0.0235	n.a.	1	1	1	1	Anxa1
GO:0060217	BP	e	hemangioblast cell differentiation	1/769	1/32695	0.0235	n.a.	1	1	1	1	Tal1
GO:1905404	BP	e	positive regulation of activated CD8-positive, alpha-beta T cell apoptotic process	1/769	1/32695	0.0235	n.a.	1	1	1	1	Cd274
GO:0035688	BP	e	T-helper 1 cell diapedesis	1/769	1/32695	0.0235	n.a.	1	1	1	1	Ccl5
GO:0051580	BP	e	regulation of neurotransmitter uptake	1/769	1/32695	0.0235	n.a.	1	1	1	1	Gfap
GO:0010952	BP	e	positive regulation of peptidase activity	1/769	1/32695	0.0235	n.a.	1	1	1	1	Ctsh
GO:1902228	BP	e	positive regulation of macrophage colony-stimulating factor signaling pathway	1/769	1/32695	0.0235	n.a.	1	1	1	1	Csf1
GO:1905310	BP	e	regulation of cardiac neural crest cell migration involved in outflow tract morphogenesis	1/769	1/32695	0.0235	n.a.	1	1	1	1	Eng
GO:0046968	BP	e	peptide antigen transport	1/769	1/32695	0.0235	n.a.	1	1	1	1	Tap2
GO:0018153	BP	e	isopeptide cross-linking via N6-(L-isoglutamyl)-L-lysine	1/769	1/32695	0.0235	n.a.	1	1	1	1	Tgm2
GO:0002462	BP	e	tolerance induction to nonself antigen	1/769	1/32695	0.0235	n.a.	1	1	1	1	C3ar1
GO:0015682	BP	e	ferric iron transport	1/769	1/32695	0.0235	n.a.	1	1	1	1	Trf
GO:1901331	BP	e	positive regulation of odontoblast differentiation	1/769	1/32695	0.0235	n.a.	1	1	1	1	Serpine1
GO:0072683	BP	e	T cell extravasation	1/769	1/32695	0.0235	n.a.	1	1	1	1	Icam1
GO:0002287	BP	e	alpha-beta T cell activation involved in immune response	1/769	1/32695	0.0235	n.a.	1	1	1	1	H2-M3
GO:1905000	BP	e	regulation of membrane repolarization during atrial cardiac muscle cell action potential	1/769	1/32695	0.0235	n.a.	1	1	1	1	Flna
GO:0061642	BP	e	chemoattraction of axon	1/769	1/32695	0.0235	n.a.	1	1	1	1	Robo3
GO:2000116	BP	e	regulation of cysteine-type endopeptidase activity	1/769	1/32695	0.0235	n.a.	1	1	1	1	Psmb9
GO:0014853	BP	e	regulation of excitatory postsynaptic membrane potential involved in skeletal muscle contraction	1/769	1/32695	0.0235	n.a.	1	1	1	1	Dmpk
GO:0030845	BP	e	phospholipase C-inhibiting G-protein coupled receptor signaling pathway	1/769	1/32695	0.0235	n.a.	1	1	1	1	Plek
GO:0050823	BP	e	peptide antigen stabilization	1/769	1/32695	0.0235	n.a.	1	1	1	1	Tapbp
GO:0046086	BP	e	adenosine biosynthetic process	1/769	1/32695	0.0235	n.a.	1	1	1	1	Nt5e
GO:2000325	BP	e	regulation of ligand-dependent nuclear receptor transcription coactivator activity	1/769	1/32695	0.0235	n.a.	1	1	1	1	Nr1h3
GO:2000136	BP	e	regulation of cell proliferation involved in heart morphogenesis	1/769	1/32695	0.0235	n.a.	1	1	1	1	Eng
GO:0015707	BP	e	nitrite transport	1/769	1/32695	0.0235	n.a.	1	1	1	1	Slc11a1
GO:0010933	BP	e	positive regulation of macrophage tolerance induction	1/769	1/32695	0.0235	n.a.	1	1	1	1	Irak3
GO:2001213	BP	e	negative regulation of vasculogenesis	1/769	1/32695	0.0235	n.a.	1	1	1	1	Xdh
GO:1905597	BP	e	positive regulation of low-density lipoprotein particle receptor binding	1/769	1/32695	0.0235	n.a.	1	1	1	1	Anxa2
GO:1905599	BP	e	positive regulation of low-density lipoprotein receptor activity	1/769	1/32695	0.0235	n.a.	1	1	1	1	Anxa2
GO:0021534	BP	e	cell proliferation in hindbrain	1/769	1/32695	0.0235	n.a.	1	1	1	1	C5ar1
GO:0032892	BP	e	positive regulation of organic acid transport	1/769	1/32695	0.0235	n.a.	1	1	1	1	Fxyd1
GO:1904714	BP	e	regulation of chaperone-mediated autophagy	1/769	1/32695	0.0235	n.a.	1	1	1	1	Gfap
GO:0014739	BP	e	positive regulation of muscle hyperplasia	1/769	1/32695	0.0235	n.a.	1	1	1	1	Aif1
GO:0014895	BP	e	smooth muscle hypertrophy	1/769	1/32695	0.0235	n.a.	1	1	1	1	Cyba
GO:0034127	BP	e	regulation of MyD88-independent toll-like receptor signaling pathway	1/769	1/32695	0.0235	n.a.	1	1	1	1	Irf7
GO:0050866	BP	e	negative regulation of cell activation	1/769	1/32695	0.0235	n.a.	1	1	1	1	Emilin1
GO:0061444	BP	e	endocardial cushion cell development	1/769	1/32695	0.0235	n.a.	1	1	1	1	Jag1
GO:0046456	BP	e	icosanoid biosynthetic process	1/769	1/32695	0.0235	n.a.	1	1	1	1	Pla2g4a
GO:0052362	BP	e	catabolism by host of symbiont protein	1/769	1/32695	0.0235	n.a.	1	1	1	1	Anxa2
GO:0072040	BP	e	negative regulation of mesenchymal cell apoptotic process involved in nephron morphogenesis	1/769	1/32695	0.0235	n.a.	1	1	1	1	Bmp7
GO:0045355	BP	e	negative regulation of interferon-alpha biosynthetic process	1/769	1/32695	0.0235	n.a.	1	1	1	1	Nmi
GO:0019478	BP	e	D-amino acid catabolic process	1/769	1/32695	0.0235	n.a.	1	1	1	1	Ddo
GO:0019290	BP	e	siderophore biosynthetic process	1/769	1/32695	0.0235	n.a.	1	1	1	1	Bdh2
GO:0032685	BP	e	negative regulation of granulocyte macrophage colony-stimulating factor production	1/769	1/32695	0.0235	n.a.	1	1	1	1	Cd84
GO:0015742	BP	e	alpha-ketoglutarate transport	1/769	1/32695	0.0235	n.a.	1	1	1	1	Slc22a6
GO:0061163	BP	e	endoplasmic reticulum polarization	1/769	1/32695	0.0235	n.a.	1	1	1	1	Shtn1
GO:1903487	BP	e	regulation of lactation	1/769	1/32695	0.0235	n.a.	1	1	1	1	Oas2
GO:0006150	BP	e	hypoxanthine oxidation	1/769	1/32695	0.0235	n.a.	1	1	1	1	Xdh
GO:1901706	BP	e	mesenchymal cell differentiation involved in bone development	1/769	1/32695	0.0235	n.a.	1	1	1	1	Ranbp3l
GO:0038168	BP	e	epidermal growth factor receptor signaling pathway via I-kappaB kinase/NF-kappaB cascade	1/769	1/32695	0.0235	n.a.	1	1	1	1	Rassf2
GO:0003163	BP	e	sinoatrial node development	1/769	1/32695	0.0235	n.a.	1	1	1	1	Tbx18
GO:1904022	BP	e	positive regulation of G-protein coupled receptor internalization	1/769	1/32695	0.0235	n.a.	1	1	1	1	Apln
GO:0006196	BP	e	AMP catabolic process	1/769	1/32695	0.0235	n.a.	1	1	1	1	Nt5e
GO:0060376	BP	e	positive regulation of mast cell differentiation	1/769	1/32695	0.0235	n.a.	1	1	1	1	Stat5a
GO:0060375	BP	e	regulation of mast cell differentiation	1/769	1/32695	0.0235	n.a.	1	1	1	1	Tal1
GO:0052547	BP	e	regulation of peptidase activity	1/769	1/32695	0.0235	n.a.	1	1	1	1	Cav1
GO:0071449	BP	e	cellular response to lipid hydroperoxide	1/769	1/32695	0.0235	n.a.	1	1	1	1	Mgst1
GO:0090025	BP	e	regulation of monocyte chemotaxis	1/769	1/32695	0.0235	n.a.	1	1	1	1	Lyn
GO:0003106	BP	e	negative regulation of glomerular filtration by angiotensin	1/769	1/32695	0.0235	n.a.	1	1	1	1	Cyba
GO:0033373	BP	e	maintenance of protease location in mast cell secretory granule	1/769	1/32695	0.0235	n.a.	1	1	1	1	Srgn
GO:0033371	BP	e	T cell secretory granule organization	1/769	1/32695	0.0235	n.a.	1	1	1	1	Srgn
GO:0043060	BP	e	meiotic metaphase I plate congression	1/769	1/32695	0.0235	n.a.	1	1	1	1	Mlh1
GO:0031269	BP	e	pseudopodium assembly	1/769	1/32695	0.0235	n.a.	1	1	1	1	Ccl5
GO:0010813	BP	e	neuropeptide catabolic process	1/769	1/32695	0.0235	n.a.	1	1	1	1	Ctsh
GO:0002651	BP	e	positive regulation of tolerance induction to self antigen	1/769	1/32695	0.0235	n.a.	1	1	1	1	Tgfbr2
GO:0002652	BP	e	regulation of tolerance induction dependent upon immune response	1/769	1/32695	0.0235	n.a.	1	1	1	1	Havcr2
GO:1903217	BP	e	negative regulation of protein processing involved in protein targeting to mitochondrion	1/769	1/32695	0.0235	n.a.	1	1	1	1	Sirt4
GO:0001811	BP	e	negative regulation of type I hypersensitivity	1/769	1/32695	0.0235	n.a.	1	1	1	1	Fcgr2b
GO:1903975	BP	e	regulation of glial cell migration	1/769	1/32695	0.0235	n.a.	1	1	1	1	Efemp1
GO:0042231	BP	e	interleukin-13 biosynthetic process	1/769	1/32695	0.0235	n.a.	1	1	1	1	Il18
GO:1903797	BP	e	positive regulation of inorganic anion transmembrane transport	1/769	1/32695	0.0235	n.a.	1	1	1	1	Fxyd1
GO:0060678	BP	e	dichotomous subdivision of terminal units involved in ureteric bud branching	1/769	1/32695	0.0235	n.a.	1	1	1	1	Foxd1
GO:0000820	BP	e	regulation of glutamine family amino acid metabolic process	1/769	1/32695	0.0235	n.a.	1	1	1	1	Sirt4
GO:0042892	BP	e	chloramphenicol transport	1/769	1/32695	0.0235	n.a.	1	1	1	1	Tlr2
GO:2000027	BP	e	regulation of organ morphogenesis	1/769	1/32695	0.0235	n.a.	1	1	1	1	Tbx1
GO:1904182	BP	e	regulation of pyruvate dehydrogenase activity	1/769	1/32695	0.0235	n.a.	1	1	1	1	Sirt4
GO:1904188	BP	e	negative regulation of transformation of host cell by virus	1/769	1/32695	0.0235	n.a.	1	1	1	1	Fbln1
GO:0035769	BP	e	B cell chemotaxis across high endothelial venule	1/769	1/32695	0.0235	n.a.	1	1	1	1	Cxcl13
GO:0035768	BP	e	endothelial cell chemotaxis to fibroblast growth factor	1/769	1/32695	0.0235	n.a.	1	1	1	1	Cxcl13
GO:0035491	BP	e	positive regulation of leukotriene production involved in inflammatory response	1/769	1/32695	0.0235	n.a.	1	1	1	1	Serpine1
GO:0060611	BP	e	mammary gland fat development	1/769	1/32695	0.0235	n.a.	1	1	1	1	Csf1
GO:0034240	BP	e	negative regulation of macrophage fusion	1/769	1/32695	0.0235	n.a.	1	1	1	1	Stat1
GO:0070430	BP	e	positive regulation of nucleotide-binding oligomerization domain containing 1 signaling pathway	1/769	1/32695	0.0235	n.a.	1	1	1	1	Tlr4
GO:0060829	BP	e	negative regulation of canonical Wnt signaling pathway involved in neural plate anterior/posterior pattern formation	1/769	1/32695	0.0235	n.a.	1	1	1	1	Tbx18
GO:0060448	BP	e	dichotomous subdivision of terminal units involved in lung branching	1/769	1/32695	0.0235	n.a.	1	1	1	1	Ctsh
GO:0039530	BP	e	MDA-5 signaling pathway	1/769	1/32695	0.0235	n.a.	1	1	1	1	Ifih1
GO:0072267	BP	e	metanephric capsule specification	1/769	1/32695	0.0235	n.a.	1	1	1	1	Foxd1
GO:1900225	BP	e	regulation of NLRP3 inflammasome complex assembly	1/769	1/32695	0.0235	n.a.	1	1	1	1	Eif2ak2
GO:0060588	BP	e	negative regulation of lipoprotein lipid oxidation	1/769	1/32695	0.0235	n.a.	1	1	1	1	Apod
GO:1905863	BP	e	invadopodium organization	1/769	1/32695	0.0235	n.a.	1	1	1	1	Pdpn
GO:0090366	BP	e	positive regulation of mRNA modification	1/769	1/32695	0.0235	n.a.	1	1	1	1	Apobec1
GO:0006835	BP	e	dicarboxylic acid transport	1/769	1/32695	0.0235	n.a.	1	1	1	1	Slc13a3
GO:0061044	BP	e	negative regulation of vascular wound healing	1/769	1/32695	0.0235	n.a.	1	1	1	1	Serpine1
GO:0002838	BP	e	negative regulation of immune response to tumor cell	1/769	1/32695	0.0235	n.a.	1	1	1	1	Havcr2
GO:0010625	BP	e	positive regulation of Schwann cell proliferation	1/769	1/32695	0.0235	n.a.	1	1	1	1	Gfap
GO:0034238	BP	e	macrophage fusion	1/769	1/32695	0.0235	n.a.	1	1	1	1	Cd44
GO:0032274	BP	e	gonadotropin secretion	1/769	1/32695	0.0235	n.a.	1	1	1	1	Fam129b
GO:0033580	BP	e	protein galactosylation at cell surface	1/769	1/32695	0.0235	n.a.	1	1	1	1	Ggta1
GO:0009794	BP	e	regulation of mitotic cell cycle, embryonic	1/769	1/32695	0.0235	n.a.	1	1	1	1	E4f1
GO:0070392	BP	e	detection of lipoteichoic acid	1/769	1/32695	0.0235	n.a.	1	1	1	1	Trem2
GO:0050931	BP	e	pigment cell differentiation	1/769	1/32695	0.0235	n.a.	1	1	1	1	Cd63
GO:0002774	BP	e	Fc receptor mediated inhibitory signaling pathway	1/769	1/32695	0.0235	n.a.	1	1	1	1	Lyn
GO:0006876	BP	e	cellular cadmium ion homeostasis	1/769	1/32695	0.0235	n.a.	1	1	1	1	Slc11a1
GO:0009635	BP	e	response to herbicide	1/769	1/32695	0.0235	n.a.	1	1	1	1	Lcn2
GO:0042313	BP	e	protein kinase C deactivation	1/769	1/32695	0.0235	n.a.	1	1	1	1	Edn1
GO:0090322	BP	e	regulation of superoxide metabolic process	1/769	1/32695	0.0235	n.a.	1	1	1	1	Shc1
GO:0060753	BP	e	regulation of mast cell chemotaxis	1/769	1/32695	0.0235	n.a.	1	1	1	1	Rac2
GO:1902038	BP	e	positive regulation of hematopoietic stem cell differentiation	1/769	1/32695	0.0235	n.a.	1	1	1	1	Foxc1
GO:0018872	BP	e	arsonoacetate metabolic process	1/769	1/32695	0.0235	n.a.	1	1	1	1	As3mt
GO:0045799	BP	e	positive regulation of chromatin assembly or disassembly	1/769	1/32695	0.0235	n.a.	1	1	1	1	Tal1
GO:0002434	BP	e	immune complex clearance	1/769	1/32695	0.0235	n.a.	1	1	1	1	Fcgr2b
GO:0002758	BP	e	innate immune response-activating signal transduction	1/769	1/32695	0.0235	n.a.	1	1	1	1	Tlr4
GO:0048757	BP	e	pigment granule maturation	1/769	1/32695	0.0235	n.a.	1	1	1	1	Cd63
GO:0044147	BP	e	negative regulation of development of symbiont involved in interaction with host	1/769	1/32695	0.0235	n.a.	1	1	1	1	Anxa2
GO:0032499	BP	e	detection of peptidoglycan	1/769	1/32695	0.0235	n.a.	1	1	1	1	Trem2
GO:0061573	BP	e	actin filament bundle retrograde transport	1/769	1/32695	0.0235	n.a.	1	1	1	1	Shtn1
GO:0031323	BP	e	regulation of cellular metabolic process	1/769	1/32695	0.0235	n.a.	1	1	1	1	Hexb
GO:1905031	BP	e	regulation of membrane repolarization during cardiac muscle cell action potential	1/769	1/32695	0.0235	n.a.	1	1	1	1	Flna
GO:0035691	BP	e	macrophage migration inhibitory factor signaling pathway	1/769	1/32695	0.0235	n.a.	1	1	1	1	Cd74
GO:0009855	BP	e	determination of bilateral symmetry	1/769	1/32695	0.0235	n.a.	1	1	1	1	Aldh1a2
GO:1903579	BP	e	negative regulation of ATP metabolic process	1/769	1/32695	0.0235	n.a.	1	1	1	1	Tspo
GO:1903572	BP	e	positive regulation of protein kinase D signaling	1/769	1/32695	0.0235	n.a.	1	1	1	1	Vegfa
GO:0014806	BP	e	smooth muscle hyperplasia	1/769	1/32695	0.0235	n.a.	1	1	1	1	Nos3
GO:0052047	BP	e	interaction with other organism via secreted substance involved in symbiotic interaction	1/769	1/32695	0.0235	n.a.	1	1	1	1	Fn1
GO:1900147	BP	e	regulation of Schwann cell migration	1/769	1/32695	0.0235	n.a.	1	1	1	1	Vim
GO:1902239	BP	e	negative regulation of intrinsic apoptotic signaling pathway in response to osmotic stress by p53 class mediator	1/769	1/32695	0.0235	n.a.	1	1	1	1	Bdkrb2
GO:2000350	BP	e	positive regulation of CD40 signaling pathway	1/769	1/32695	0.0235	n.a.	1	1	1	1	Trem2
GO:0051257	BP	e	meiotic spindle midzone assembly	1/769	1/32695	0.0235	n.a.	1	1	1	1	Mlh1
GO:0002477	BP	e	antigen processing and presentation of exogenous peptide antigen via MHC class Ib	1/769	1/32695	0.0235	n.a.	1	1	1	1	H2-M3
GO:0002715	BP	e	regulation of natural killer cell mediated immunity	1/769	1/32695	0.0235	n.a.	1	1	1	1	H2-T23
GO:0051641	BP	e	cellular localization	1/769	1/32695	0.0235	n.a.	1	1	1	1	Myo1d
GO:1903556	BP	e	negative regulation of tumor necrosis factor superfamily cytokine production	1/769	1/32695	0.0235	n.a.	1	1	1	1	Cd274
GO:1905222	BP	e	atrioventricular canal morphogenesis	1/769	1/32695	0.0235	n.a.	1	1	1	1	Eng
GO:0032632	BP	e	interleukin-3 production	1/769	1/32695	0.0235	n.a.	1	1	1	1	Slc11a1
GO:0052063	BP	e	induction by symbiont of defense-related host nitric oxide production	1/769	1/32695	0.0235	n.a.	1	1	1	1	Tlr2
GO:0051897	BP	e	positive regulation of protein kinase B signaling	6/769	94/32695	0.0237	n.a.	6	1	1	1	Eng, Hcls1, Igf2, Il18, Myoc, Vegfa
GO:0045471	BP	e	response to ethanol	4/769	47/32695	0.0244	n.a.	4	1	1	1	Aldh1a1, Apobec1, Casp8, Tlr4
GO:0030517	BP	e	negative regulation of axon extension	3/769	27/32695	0.0249	n.a.	3	1	1	1	Arhgap4, Ccr5, Mag
GO:1902042	BP	e	negative regulation of extrinsic apoptotic signaling pathway via death domain receptors	3/769	27/32695	0.0249	n.a.	3	1	1	1	Hmox1, Icam1, Serpine1
GO:0032870	BP	e	cellular response to hormone stimulus	3/769	27/32695	0.0249	n.a.	3	1	1	1	Cga, Ncf2, Stat3
GO:2000378	BP	e	negative regulation of reactive oxygen species metabolic process	3/769	27/32695	0.0249	n.a.	3	1	1	1	Cryab, Hk2, Trim30a
GO:0010976	BP	e	positive regulation of neuron projection development	8/769	150/32695	0.0259	n.a.	8	1	1	1	Adamts1, Cxcl5, Fes, Grn, Lyn, Nfe2l2, Plxnb3, Serpinf1
GO:0070301	BP	e	cellular response to hydrogen peroxide	4/769	48/32695	0.0261	n.a.	4	1	1	1	Anxa1, Cyp1b1, Lcn2, Nfe2l2
GO:0000289	BP	e	nuclear-transcribed mRNA poly(A) tail shortening	2/769	11/32695	0.0264	n.a.	2	1	1	1	Mlh1, Pan2
GO:0060100	BP	e	positive regulation of phagocytosis, engulfment	2/769	11/32695	0.0264	n.a.	2	1	1	1	Fcgr1, Nckap1l
GO:0034116	BP	e	positive regulation of heterotypic cell-cell adhesion	2/769	11/32695	0.0264	n.a.	2	1	1	1	Bmp7, Cd44
GO:0010820	BP	e	positive regulation of T cell chemotaxis	2/769	11/32695	0.0264	n.a.	2	1	1	1	Ccl5, Cxcl13
GO:1901222	BP	e	regulation of NIK/NF-kappaB signaling	2/769	11/32695	0.0264	n.a.	2	1	1	1	Rassf2, Uaca
GO:0002827	BP	e	positive regulation of T-helper 1 type immune response	2/769	11/32695	0.0264	n.a.	2	1	1	1	H2-Ab1, Slc11a1
GO:0010884	BP	e	positive regulation of lipid storage	2/769	11/32695	0.0264	n.a.	2	1	1	1	C3, Zc3h12a
GO:0050777	BP	e	negative regulation of immune response	2/769	11/32695	0.0264	n.a.	2	1	1	1	Fcgr2b, Inpp5d
GO:0090557	BP	e	establishment of endothelial intestinal barrier	2/769	11/32695	0.0264	n.a.	2	1	1	1	F11r, Icam1
GO:0080111	BP	e	DNA demethylation	2/769	11/32695	0.0264	n.a.	2	1	1	1	Apobec1, Apobec3
GO:0045086	BP	e	positive regulation of interleukin-2 biosynthetic process	2/769	11/32695	0.0264	n.a.	2	1	1	1	Il1a, Stat5a
GO:0030193	BP	e	regulation of blood coagulation	2/769	11/32695	0.0264	n.a.	2	1	1	1	Cav1, Serping1
GO:0038063	BP	e	collagen-activated tyrosine kinase receptor signaling pathway	2/769	11/32695	0.0264	n.a.	2	1	1	1	Col4a6, Ddr2
GO:0042129	BP	e	regulation of T cell proliferation	2/769	11/32695	0.0264	n.a.	2	1	1	1	Lgals3, Rac2
GO:0046785	BP	e	microtubule polymerization	2/769	11/32695	0.0264	n.a.	2	1	1	1	Cav1, Tppp3
GO:0043281	BP	e	regulation of cysteine-type endopeptidase activity involved in apoptotic process	2/769	11/32695	0.0264	n.a.	2	1	1	1	Cdh1, Pycard
GO:0030001	BP	e	metal ion transport	3/769	28/32695	0.0274	n.a.	3	1	1	1	Atp1b3, Slc11a1, Slc39a8
GO:0051017	BP	e	actin filament bundle assembly	4/769	49/32695	0.0279	n.a.	4	1	1	1	Aif1, Lcp1, Pls1, Rhoc
GO:0043525	BP	e	positive regulation of neuron apoptotic process	5/769	73/32695	0.0288	n.a.	5	1	1	1	Ccl3, Ctsz, Il18, Ncf2, Tnfrsf1a
GO:0006874	BP	e	cellular calcium ion homeostasis	6/769	99/32695	0.0296	n.a.	6	1	1	1	Cav1, Ccl5, Dmpk, Edn3, Hexb, S100b
GO:0050770	BP	e	regulation of axonogenesis	3/769	29/32695	0.0301	n.a.	3	1	1	1	Kif13b, Ssh3, Vim
GO:0006953	BP	e	acute-phase response	3/769	29/32695	0.0301	n.a.	3	1	1	1	Fn1, Serpina3n, Stat3
GO:0008152	BP	e	metabolic process	17/769	412/32695	0.0308	n.a.	17	1	1	1	Alas2, Aldh1a1, Aldh1a2, Aldh1l2, Aspa, Bcat2, Enpp6, Fah, Hexa, Hexb, Hk2, Lpcat2, Lyz2, Man2b1, Naalad2, Pla2g4a, Pnpla7
GO:0045577	BP	e	regulation of B cell differentiation	2/769	12/32695	0.0312	n.a.	2	1	1	1	Ptpn6, Ptprc
GO:0032825	BP	e	positive regulation of natural killer cell differentiation	2/769	12/32695	0.0312	n.a.	2	1	1	1	Irf1, Stat5a
GO:0045744	BP	e	negative regulation of G-protein coupled receptor protein signaling pathway	2/769	12/32695	0.0312	n.a.	2	1	1	1	Ccl5, Plek
GO:0008154	BP	e	actin polymerization or depolymerization	2/769	12/32695	0.0312	n.a.	2	1	1	1	Vasp, Wipf1
GO:0009607	BP	e	response to biotic stimulus	2/769	12/32695	0.0312	n.a.	2	1	1	1	Ifitm1, Ifitm3
GO:0060700	BP	e	regulation of ribonuclease activity	2/769	12/32695	0.0312	n.a.	2	1	1	1	Oas2, Oasl2
GO:0006940	BP	e	regulation of smooth muscle contraction	2/769	12/32695	0.0312	n.a.	2	1	1	1	Cav1, Shc1
GO:0032897	BP	e	negative regulation of viral transcription	2/769	12/32695	0.0312	n.a.	2	1	1	1	Ifitm3, Trim21
GO:0016045	BP	e	detection of bacterium	2/769	12/32695	0.0312	n.a.	2	1	1	1	Naip2, Pglyrp1
GO:0046688	BP	e	response to copper ion	2/769	12/32695	0.0312	n.a.	2	1	1	1	Cp, Il1a
GO:0097756	BP	e	negative regulation of blood vessel diameter	2/769	12/32695	0.0312	n.a.	2	1	1	1	Ptgs2, Smad6
GO:0032740	BP	e	positive regulation of interleukin-17 production	2/769	12/32695	0.0312	n.a.	2	1	1	1	Il18, Ly9
GO:0008347	BP	e	glial cell migration	2/769	12/32695	0.0312	n.a.	2	1	1	1	Fn1, Tspo
GO:0019538	BP	e	protein metabolic process	2/769	12/32695	0.0312	n.a.	2	1	1	1	Cdh1, Tgm1
GO:0060546	BP	e	negative regulation of necroptotic process	2/769	12/32695	0.0312	n.a.	2	1	1	1	Casp8, Cav1
GO:0045820	BP	e	negative regulation of glycolytic process	2/769	12/32695	0.0312	n.a.	2	1	1	1	Ier3, Stat3
GO:0001523	BP	e	retinoid metabolic process	2/769	12/32695	0.0312	n.a.	2	1	1	1	Aldh1a1, Aldh1a2
GO:0002430	BP	e	complement receptor mediated signaling pathway	2/769	12/32695	0.0312	n.a.	2	1	1	1	C3ar1, C5ar1
GO:0051024	BP	e	positive regulation of immunoglobulin secretion	2/769	12/32695	0.0312	n.a.	2	1	1	1	H2-T23, Il33
GO:0050821	BP	e	protein stabilization	8/769	156/32695	0.0317	n.a.	8	1	1	1	Atp1b3, Cryab, D7Ertd443e, Flna, Ifi30, Irgm2, Lamp2, Rassf2
GO:0007566	BP	e	embryo implantation	4/769	51/32695	0.0318	n.a.	4	1	1	1	Cdh1, Grn, Ptgs2, Reck
GO:1900087	BP	e	positive regulation of G1/S transition of mitotic cell cycle	3/769	30/32695	0.0329	n.a.	3	1	1	1	Adamts1, Aif1, Anxa1
GO:0045662	BP	e	negative regulation of myoblast differentiation	3/769	30/32695	0.0329	n.a.	3	1	1	1	Ccl9, Cxcl10, Il18
GO:0010667	BP	e	negative regulation of cardiac muscle cell apoptotic process	3/769	30/32695	0.0329	n.a.	3	1	1	1	Nfe2l2, Rgl2, Sirt4
GO:0001568	BP	e	blood vessel development	5/769	76/32695	0.0335	n.a.	5	1	1	1	Aldh1a2, Foxc1, Lox, Tbx1, Vegfa
GO:0043280	BP	e	positive regulation of cysteine-type endopeptidase activity involved in apoptotic process	4/769	52/32695	0.0338	n.a.	4	1	1	1	Casp12, Pycard, Tnfsf10, Uaca
GO:0030036	BP	e	actin cytoskeleton organization	8/769	159/32695	0.0349	n.a.	8	1	1	1	Cdc42ep2, Flna, Flnb, Rac2, Rhoj, Shc1, Vasp, Wipf1
GO:0046330	BP	e	positive regulation of JNK cascade	5/769	77/32695	0.0351	n.a.	5	1	1	1	Fcgr2b, Il1a, Pycard, Rassf2, Tlr4
GO:0002040	BP	e	sprouting angiogenesis	3/769	31/32695	0.0358	n.a.	3	1	1	1	Eng, Rnf213, Vegfa
GO:0031424	BP	e	keratinization	3/769	31/32695	0.0358	n.a.	3	1	1	1	Il1a, Ppl, Tgm1
GO:2000352	BP	e	negative regulation of endothelial cell apoptotic process	3/769	31/32695	0.0358	n.a.	3	1	1	1	Icam1, Nfe2l2, Serpine1
GO:0001945	BP	e	lymph vessel development	2/769	13/32695	0.0363	n.a.	2	1	1	1	Foxc1, Tbx1
GO:0048304	BP	e	positive regulation of isotype switching to IgG isotypes	2/769	13/32695	0.0363	n.a.	2	1	1	1	Mlh1, Ptprc
GO:0071679	BP	e	commissural neuron axon guidance	2/769	13/32695	0.0363	n.a.	2	1	1	1	Robo3, Vegfa
GO:0016331	BP	e	morphogenesis of embryonic epithelium	2/769	13/32695	0.0363	n.a.	2	1	1	1	Aldh1a2, Tbx18
GO:0060391	BP	e	positive regulation of SMAD protein signal transduction	2/769	13/32695	0.0363	n.a.	2	1	1	1	Bmp6, Dab2
GO:0032609	BP	e	interferon-gamma production	2/769	13/32695	0.0363	n.a.	2	1	1	1	Il18, Tlr4
GO:0042574	BP	e	retinal metabolic process	2/769	13/32695	0.0363	n.a.	2	1	1	1	Aldh1a2, Cyp1b1
GO:0002523	BP	e	leukocyte migration involved in inflammatory response	2/769	13/32695	0.0363	n.a.	2	1	1	1	Itgam, Itgb2
GO:0097202	BP	e	activation of cysteine-type endopeptidase activity	2/769	13/32695	0.0363	n.a.	2	1	1	1	Casp8, Pycard
GO:0097011	BP	e	cellular response to granulocyte macrophage colony-stimulating factor stimulus	2/769	13/32695	0.0363	n.a.	2	1	1	1	Csf2ra, Stat5a
GO:1903428	BP	e	positive regulation of reactive oxygen species biosynthetic process	2/769	13/32695	0.0363	n.a.	2	1	1	1	Cyba, Tlr4
GO:0033630	BP	e	positive regulation of cell adhesion mediated by integrin	2/769	13/32695	0.0363	n.a.	2	1	1	1	Nckap1l, Ptpn6
GO:0050930	BP	e	induction of positive chemotaxis	2/769	13/32695	0.0363	n.a.	2	1	1	1	Cxcl12, Vegfa
GO:0032233	BP	e	positive regulation of actin filament bundle assembly	2/769	13/32695	0.0363	n.a.	2	1	1	1	Flna, Plek
GO:0043117	BP	e	positive regulation of vascular permeability	2/769	13/32695	0.0363	n.a.	2	1	1	1	Il18, Vegfa
GO:0000902	BP	e	cell morphogenesis	6/769	104/32695	0.0364	n.a.	6	1	1	1	Cdh1, Cdh19, Nckap1l, Pdpn, Tfcp2l1, Unc93b1
GO:0007179	BP	e	transforming growth factor beta receptor signaling pathway	5/769	78/32695	0.0368	n.a.	5	1	1	1	Acvrl1, Eng, Itgb5, Smad6, Tgfbr2
GO:0035914	BP	e	skeletal muscle cell differentiation	4/769	54/32695	0.0381	n.a.	4	1	1	1	Atf3, Btg2, Maff, Nupr1
GO:0032092	BP	e	positive regulation of protein binding	5/769	79/32695	0.0386	n.a.	5	1	1	1	B2m, Cav1, Hfe, Tmem173, Vtn
GO:0070372	BP	e	regulation of ERK1 and ERK2 cascade	3/769	32/32695	0.0388	n.a.	3	1	1	1	Fn1, Lyn, Ptpn6
GO:0009968	BP	e	negative regulation of signal transduction	6/769	106/32695	0.0393	n.a.	6	1	1	1	Cav1, Csf1r, Ddr2, Inpp5d, Prr5l, Socs3
GO:0043406	BP	e	positive regulation of MAP kinase activity	4/769	55/32695	0.0403	n.a.	4	1	1	1	Edn1, Edn3, Pik3r5, Vegfa
GO:0031100	BP	e	animal organ regeneration	2/769	14/32695	0.0417	n.a.	2	1	1	1	Cxcl12, Cxcl5
GO:0071803	BP	e	positive regulation of podosome assembly	2/769	14/32695	0.0417	n.a.	2	1	1	1	Lcp1, Msn
GO:0032693	BP	e	negative regulation of interleukin-10 production	2/769	14/32695	0.0417	n.a.	2	1	1	1	Cd274, Fcgr2b
GO:0051895	BP	e	negative regulation of focal adhesion assembly	2/769	14/32695	0.0417	n.a.	2	1	1	1	Acvrl1, Apod
GO:0045723	BP	e	positive regulation of fatty acid biosynthetic process	2/769	14/32695	0.0417	n.a.	2	1	1	1	Mlxipl, Nr1h3
GO:0061051	BP	e	positive regulation of cell growth involved in cardiac muscle cell development	2/769	14/32695	0.0417	n.a.	2	1	1	1	Edn1, Wisp1
GO:0045745	BP	e	positive regulation of G-protein coupled receptor protein signaling pathway	2/769	14/32695	0.0417	n.a.	2	1	1	1	C3, Klk6
GO:0009967	BP	e	positive regulation of signal transduction	2/769	14/32695	0.0417	n.a.	2	1	1	1	Cav1, Vegfa
GO:0030224	BP	e	monocyte differentiation	2/769	14/32695	0.0417	n.a.	2	1	1	1	Pir, Vegfa
GO:2000178	BP	e	negative regulation of neural precursor cell proliferation	2/769	14/32695	0.0417	n.a.	2	1	1	1	Btg2, Ccr5
GO:0045060	BP	e	negative thymic T cell selection	2/769	14/32695	0.0417	n.a.	2	1	1	1	Cd74, Ptprc
GO:0006968	BP	e	cellular defense response	2/769	14/32695	0.0417	n.a.	2	1	1	1	B2m, Clec2d
GO:0045647	BP	e	negative regulation of erythrocyte differentiation	2/769	14/32695	0.0417	n.a.	2	1	1	1	Stat5a, Tal1
GO:0010839	BP	e	negative regulation of keratinocyte proliferation	2/769	14/32695	0.0417	n.a.	2	1	1	1	Cd109, Ctsl
GO:0001818	BP	e	negative regulation of cytokine production	2/769	14/32695	0.0417	n.a.	2	1	1	1	Gpnmb, Slc11a1
GO:0030194	BP	e	positive regulation of blood coagulation	2/769	14/32695	0.0417	n.a.	2	1	1	1	Nfe2l2, Serpine1
GO:0022617	BP	e	extracellular matrix disassembly	2/769	14/32695	0.0417	n.a.	2	1	1	1	Eng, Lcp1
GO:0016540	BP	e	protein autoprocessing	2/769	14/32695	0.0417	n.a.	2	1	1	1	Casp12, Ctsl
GO:2000279	BP	e	negative regulation of DNA biosynthetic process	2/769	14/32695	0.0417	n.a.	2	1	1	1	Acvrl1, Fam129b
GO:0050709	BP	e	negative regulation of protein secretion	2/769	14/32695	0.0417	n.a.	2	1	1	1	Anxa1, Rsad2
GO:0043518	BP	e	negative regulation of DNA damage response, signal transduction by p53 class mediator	2/769	14/32695	0.0417	n.a.	2	1	1	1	Cd44, Cd74
GO:0045059	BP	e	positive thymic T cell selection	2/769	14/32695	0.0417	n.a.	2	1	1	1	Cd74, Ptprc
GO:0032570	BP	e	response to progesterone	2/769	14/32695	0.0417	n.a.	2	1	1	1	Cav1, Nr1h3
GO:2001240	BP	e	negative regulation of extrinsic apoptotic signaling pathway in absence of ligand	3/769	33/32695	0.0419	n.a.	3	1	1	1	Cx3cr1, Eya4, Pf4
GO:0071773	BP	e	cellular response to BMP stimulus	3/769	33/32695	0.0419	n.a.	3	1	1	1	Acvrl1, Bmp6, Bmp7
GO:0051209	BP	e	release of sequestered calcium ion into cytosol	3/769	33/32695	0.0419	n.a.	3	1	1	1	Itpr3, Plcg2, Ptprc
GO:0048015	BP	e	phosphatidylinositol-mediated signaling	3/769	33/32695	0.0419	n.a.	3	1	1	1	Car8, Csf1r, Gab2
GO:0030182	BP	e	neuron differentiation	7/769	136/32695	0.0422	n.a.	7	1	1	1	Aldh1a2, Btg2, Edn3, Nrbp2, Runx1, Shc1, Tal1
GO:0000187	BP	e	activation of MAPK activity	5/769	81/32695	0.0423	n.a.	5	1	1	1	Cd74, Plce1, Ptprc, Shc1, Tlr4
GO:0001701	BP	e	in utero embryonic development	12/769	280/32695	0.044	n.a.	12	1	1	1	Acvrl1, Cdh1, Dab2, Edn1, Foxc1, Hba-a2, Igf2, Maff, Nos3, Runx1, Tgfbr2, Vegfa
GO:0017148	BP	e	negative regulation of translation	5/769	82/32695	0.0442	n.a.	5	1	1	1	Ang, Btg2, Eif2ak2, Eif4ebp1, Rida
GO:0030168	BP	e	platelet activation	3/769	34/32695	0.0452	n.a.	3	1	1	1	Entpd1, Pf4, Vwf
GO:0050900	BP	e	leukocyte migration	3/769	34/32695	0.0452	n.a.	3	1	1	1	C3ar1, C5ar1, Podxl
GO:0097755	BP	e	positive regulation of blood vessel diameter	3/769	34/32695	0.0452	n.a.	3	1	1	1	Adm, Apln, Scpep1
GO:0048147	BP	e	negative regulation of fibroblast proliferation	3/769	34/32695	0.0452	n.a.	3	1	1	1	Fth1, Ifi30, Nupr1
GO:0050852	BP	e	T cell receptor signaling pathway	5/769	83/32695	0.0461	n.a.	5	1	1	1	Icosl, Plcg2, Ptprc, Themis2, Zc3h12a
GO:0030852	BP	e	regulation of granulocyte differentiation	1/769	2/32695	0.0465	n.a.	1	1	1	1	Rbp1
GO:0031109	BP	e	microtubule polymerization or depolymerization	1/769	2/32695	0.0465	n.a.	1	1	1	1	Cryab
GO:1902216	BP	e	positive regulation of interleukin-4-mediated signaling pathway	1/769	2/32695	0.0465	n.a.	1	1	1	1	Parp14
GO:2000627	BP	e	positive regulation of miRNA catabolic process	1/769	2/32695	0.0465	n.a.	1	1	1	1	Zc3h12a
GO:0002902	BP	e	regulation of B cell apoptotic process	1/769	2/32695	0.0465	n.a.	1	1	1	1	Lyn
GO:0001909	BP	e	leukocyte mediated cytotoxicity	1/769	2/32695	0.0465	n.a.	1	1	1	1	Stxbp2
GO:0042095	BP	e	interferon-gamma biosynthetic process	1/769	2/32695	0.0465	n.a.	1	1	1	1	Il18
GO:1903531	BP	e	negative regulation of secretion by cell	1/769	2/32695	0.0465	n.a.	1	1	1	1	Vamp8
GO:0045659	BP	e	negative regulation of neutrophil differentiation	1/769	2/32695	0.0465	n.a.	1	1	1	1	Inpp5d
GO:0097152	BP	e	mesenchymal cell apoptotic process	1/769	2/32695	0.0465	n.a.	1	1	1	1	Tbx1
GO:0010920	BP	e	negative regulation of inositol phosphate biosynthetic process	1/769	2/32695	0.0465	n.a.	1	1	1	1	Plek
GO:0002920	BP	e	regulation of humoral immune response	1/769	2/32695	0.0465	n.a.	1	1	1	1	Cd37
GO:2000316	BP	e	regulation of T-helper 17 type immune response	1/769	2/32695	0.0465	n.a.	1	1	1	1	Lgals9
GO:0043179	BP	e	rhythmic excitation	1/769	2/32695	0.0465	n.a.	1	1	1	1	Edn1
GO:0006127	BP	e	glycerophosphate shuttle	1/769	2/32695	0.0465	n.a.	1	1	1	1	Slc37a2
GO:0072070	BP	e	loop of Henle development	1/769	2/32695	0.0465	n.a.	1	1	1	1	Jag1
GO:0015891	BP	e	siderophore transport	1/769	2/32695	0.0465	n.a.	1	1	1	1	Lcn2
GO:2001037	BP	e	positive regulation of tongue muscle cell differentiation	1/769	2/32695	0.0465	n.a.	1	1	1	1	Tbx1
GO:0070560	BP	e	protein secretion by platelet	1/769	2/32695	0.0465	n.a.	1	1	1	1	Plek
GO:2000872	BP	e	positive regulation of progesterone secretion	1/769	2/32695	0.0465	n.a.	1	1	1	1	Runx1
GO:0021644	BP	e	vagus nerve morphogenesis	1/769	2/32695	0.0465	n.a.	1	1	1	1	Tbx1
GO:1902396	BP	e	protein localization to bicellular tight junction	1/769	2/32695	0.0465	n.a.	1	1	1	1	Flna
GO:1902257	BP	e	negative regulation of apoptotic process involved in outflow tract morphogenesis	1/769	2/32695	0.0465	n.a.	1	1	1	1	Foxc1
GO:0070173	BP	e	regulation of enamel mineralization	1/769	2/32695	0.0465	n.a.	1	1	1	1	Dmp1
GO:0007320	BP	e	insemination	1/769	2/32695	0.0465	n.a.	1	1	1	1	Ddo
GO:0061326	BP	e	renal tubule development	1/769	2/32695	0.0465	n.a.	1	1	1	1	Stat1
GO:0090241	BP	e	negative regulation of histone H4 acetylation	1/769	2/32695	0.0465	n.a.	1	1	1	1	Spi1
GO:0060327	BP	e	cytoplasmic actin-based contraction involved in cell motility	1/769	2/32695	0.0465	n.a.	1	1	1	1	Shtn1
GO:0002204	BP	e	somatic recombination of immunoglobulin genes involved in immune response	1/769	2/32695	0.0465	n.a.	1	1	1	1	Mlh1
GO:0002378	BP	e	immunoglobulin biosynthetic process	1/769	2/32695	0.0465	n.a.	1	1	1	1	Ptprc
GO:1902622	BP	e	regulation of neutrophil migration	1/769	2/32695	0.0465	n.a.	1	1	1	1	Rac2
GO:1902532	BP	e	negative regulation of intracellular signal transduction	1/769	2/32695	0.0465	n.a.	1	1	1	1	Lyn
GO:0016488	BP	e	farnesol catabolic process	1/769	2/32695	0.0465	n.a.	1	1	1	1	Akr1b8
GO:0002579	BP	e	positive regulation of antigen processing and presentation	1/769	2/32695	0.0465	n.a.	1	1	1	1	H2-Ab1
GO:0002576	BP	e	platelet degranulation	1/769	2/32695	0.0465	n.a.	1	1	1	1	Lyn
GO:0036037	BP	e	CD8-positive, alpha-beta T cell activation	1/769	2/32695	0.0465	n.a.	1	1	1	1	H2-T23
GO:1901731	BP	e	positive regulation of platelet aggregation	1/769	2/32695	0.0465	n.a.	1	1	1	1	Pdpn
GO:0061302	BP	e	smooth muscle cell-matrix adhesion	1/769	2/32695	0.0465	n.a.	1	1	1	1	Vtn
GO:0045368	BP	e	positive regulation of interleukin-13 biosynthetic process	1/769	2/32695	0.0465	n.a.	1	1	1	1	Tlr4
GO:0002518	BP	e	lymphocyte chemotaxis across high endothelial venule	1/769	2/32695	0.0465	n.a.	1	1	1	1	Cxcl13
GO:0046031	BP	e	ADP metabolic process	1/769	2/32695	0.0465	n.a.	1	1	1	1	Ampd3
GO:0000294	BP	e	nuclear-transcribed mRNA catabolic process, endonucleolytic cleavage-dependent decay	1/769	2/32695	0.0465	n.a.	1	1	1	1	Zc3h12a
GO:0014740	BP	e	negative regulation of muscle hyperplasia	1/769	2/32695	0.0465	n.a.	1	1	1	1	Nos3
GO:0006188	BP	e	IMP biosynthetic process	1/769	2/32695	0.0465	n.a.	1	1	1	1	Ampd3
GO:0097254	BP	e	renal tubular secretion	1/769	2/32695	0.0465	n.a.	1	1	1	1	Slc22a6
GO:0010848	BP	e	regulation of chromatin disassembly	1/769	2/32695	0.0465	n.a.	1	1	1	1	Padi2
GO:0009181	BP	e	purine ribonucleoside diphosphate catabolic process	1/769	2/32695	0.0465	n.a.	1	1	1	1	Entpd1
GO:0002537	BP	e	nitric oxide production involved in inflammatory response	1/769	2/32695	0.0465	n.a.	1	1	1	1	Tlr4
GO:0038096	BP	e	Fc-gamma receptor signaling pathway involved in phagocytosis	1/769	2/32695	0.0465	n.a.	1	1	1	1	Fcgr2b
GO:1903905	BP	e	positive regulation of establishment of T cell polarity	1/769	2/32695	0.0465	n.a.	1	1	1	1	Dock8
GO:1903900	BP	e	regulation of viral life cycle	1/769	2/32695	0.0465	n.a.	1	1	1	1	Apobec3
GO:0010044	BP	e	response to aluminum ion	1/769	2/32695	0.0465	n.a.	1	1	1	1	Xdh
GO:0032823	BP	e	regulation of natural killer cell differentiation	1/769	2/32695	0.0465	n.a.	1	1	1	1	Lgals9
GO:0016078	BP	e	tRNA catabolic process	1/769	2/32695	0.0465	n.a.	1	1	1	1	Slfn8
GO:0034635	BP	e	glutathione transport	1/769	2/32695	0.0465	n.a.	1	1	1	1	Slc22a8
GO:0060433	BP	e	bronchus development	1/769	2/32695	0.0465	n.a.	1	1	1	1	Tgfbr2
GO:0060434	BP	e	bronchus morphogenesis	1/769	2/32695	0.0465	n.a.	1	1	1	1	Tgfbr2
GO:0015817	BP	e	histidine transport	1/769	2/32695	0.0465	n.a.	1	1	1	1	Slc38a3
GO:0010823	BP	e	negative regulation of mitochondrion organization	1/769	2/32695	0.0465	n.a.	1	1	1	1	Tspo
GO:1903225	BP	e	negative regulation of endodermal cell differentiation	1/769	2/32695	0.0465	n.a.	1	1	1	1	Col5a2
GO:0032366	BP	e	intracellular sterol transport	1/769	2/32695	0.0465	n.a.	1	1	1	1	Npc2
GO:0033364	BP	e	mast cell secretory granule organization	1/769	2/32695	0.0465	n.a.	1	1	1	1	Srgn
GO:2000564	BP	e	regulation of CD8-positive, alpha-beta T cell proliferation	1/769	2/32695	0.0465	n.a.	1	1	1	1	Irf1
GO:1904209	BP	e	positive regulation of chemokine (C-C motif) ligand 2 secretion	1/769	2/32695	0.0465	n.a.	1	1	1	1	Mbp
GO:0033189	BP	e	response to vitamin A	1/769	2/32695	0.0465	n.a.	1	1	1	1	Rbp1
GO:0030185	BP	e	nitric oxide transport	1/769	2/32695	0.0465	n.a.	1	1	1	1	Edn1
GO:0006550	BP	e	isoleucine catabolic process	1/769	2/32695	0.0465	n.a.	1	1	1	1	Bcat2
GO:0006551	BP	e	leucine metabolic process	1/769	2/32695	0.0465	n.a.	1	1	1	1	Bcat2
GO:0072350	BP	e	tricarboxylic acid metabolic process	1/769	2/32695	0.0465	n.a.	1	1	1	1	Sirt4
GO:0031583	BP	e	phospholipase D-activating G-protein coupled receptor signaling pathway	1/769	2/32695	0.0465	n.a.	1	1	1	1	Edn1
GO:1903788	BP	e	positive regulation of glutathione biosynthetic process	1/769	2/32695	0.0465	n.a.	1	1	1	1	Nfe2l2
GO:0032804	BP	e	negative regulation of low-density lipoprotein particle receptor catabolic process	1/769	2/32695	0.0465	n.a.	1	1	1	1	Anxa2
GO:1990839	BP	e	response to endothelin	1/769	2/32695	0.0465	n.a.	1	1	1	1	Shc1
GO:0046223	BP	e	aflatoxin catabolic process	1/769	2/32695	0.0465	n.a.	1	1	1	1	Nfe2l2
GO:0042732	BP	e	D-xylose metabolic process	1/769	2/32695	0.0465	n.a.	1	1	1	1	Dcxr
GO:0044818	BP	e	mitotic G2/M transition checkpoint	1/769	2/32695	0.0465	n.a.	1	1	1	1	Cdk5rap3
GO:0070664	BP	e	negative regulation of leukocyte proliferation	1/769	2/32695	0.0465	n.a.	1	1	1	1	Ccl12
GO:0070667	BP	e	negative regulation of mast cell proliferation	1/769	2/32695	0.0465	n.a.	1	1	1	1	Lyn
GO:0060857	BP	e	establishment of glial blood-brain barrier	1/769	2/32695	0.0465	n.a.	1	1	1	1	Mxra8
GO:0035847	BP	e	uterine epithelium development	1/769	2/32695	0.0465	n.a.	1	1	1	1	Cdh1
GO:0035710	BP	e	CD4-positive, alpha-beta T cell activation	1/769	2/32695	0.0465	n.a.	1	1	1	1	Rsad2
GO:0097533	BP	e	cellular stress response to acid chemical	1/769	2/32695	0.0465	n.a.	1	1	1	1	Vegfa
GO:0071593	BP	e	lymphocyte aggregation	1/769	2/32695	0.0465	n.a.	1	1	1	1	Rac2
GO:1903609	BP	e	negative regulation of inward rectifier potassium channel activity	1/769	2/32695	0.0465	n.a.	1	1	1	1	Cav1
GO:1905602	BP	e	positive regulation of receptor-mediated endocytosis involved in cholesterol transport	1/769	2/32695	0.0465	n.a.	1	1	1	1	Anxa2
GO:0097187	BP	e	dentinogenesis	1/769	2/32695	0.0465	n.a.	1	1	1	1	Serpine1
GO:0006788	BP	e	heme oxidation	1/769	2/32695	0.0465	n.a.	1	1	1	1	Hmox1
GO:1904172	BP	e	positive regulation of bleb assembly	1/769	2/32695	0.0465	n.a.	1	1	1	1	Anln
GO:2000194	BP	e	regulation of female gonad development	1/769	2/32695	0.0465	n.a.	1	1	1	1	Nupr1
GO:0002192	BP	e	IRES-dependent translational initiation of linear mRNA	1/769	2/32695	0.0465	n.a.	1	1	1	1	Eif4ebp1
GO:0042496	BP	e	detection of diacyl bacterial lipopeptide	1/769	2/32695	0.0465	n.a.	1	1	1	1	Tlr2
GO:0042494	BP	e	detection of bacterial lipoprotein	1/769	2/32695	0.0465	n.a.	1	1	1	1	Ssc5d
GO:1902728	BP	e	positive regulation of growth factor dependent skeletal muscle satellite cell proliferation	1/769	2/32695	0.0465	n.a.	1	1	1	1	Stat3
GO:0009081	BP	e	branched-chain amino acid metabolic process	1/769	2/32695	0.0465	n.a.	1	1	1	1	Bcat2
GO:0009082	BP	e	branched-chain amino acid biosynthetic process	1/769	2/32695	0.0465	n.a.	1	1	1	1	Bcat2
GO:0070483	BP	e	detection of hypoxia	1/769	2/32695	0.0465	n.a.	1	1	1	1	Eng
GO:0014839	BP	e	myoblast migration involved in skeletal muscle regeneration	1/769	2/32695	0.0465	n.a.	1	1	1	1	Anxa1
GO:0071283	BP	e	cellular response to iron(III) ion	1/769	2/32695	0.0465	n.a.	1	1	1	1	B2m
GO:0042495	BP	e	detection of triacyl bacterial lipopeptide	1/769	2/32695	0.0465	n.a.	1	1	1	1	Tlr2
GO:0016479	BP	e	negative regulation of transcription by RNA polymerase I	1/769	2/32695	0.0465	n.a.	1	1	1	1	Flna
GO:0007354	BP	e	zygotic determination of anterior/posterior axis, embryo	1/769	2/32695	0.0465	n.a.	1	1	1	1	Pcsk6
GO:0036303	BP	e	lymph vessel morphogenesis	1/769	2/32695	0.0465	n.a.	1	1	1	1	Vegfa
GO:0001970	BP	e	positive regulation of activation of membrane attack complex	1/769	2/32695	0.0465	n.a.	1	1	1	1	C3
GO:0003430	BP	e	growth plate cartilage chondrocyte growth	1/769	2/32695	0.0465	n.a.	1	1	1	1	Tgfbr2
GO:0003431	BP	e	growth plate cartilage chondrocyte development	1/769	2/32695	0.0465	n.a.	1	1	1	1	Col27a1
GO:2000405	BP	e	negative regulation of T cell migration	1/769	2/32695	0.0465	n.a.	1	1	1	1	Apod
GO:0097340	BP	e	inhibition of cysteine-type endopeptidase activity	1/769	2/32695	0.0465	n.a.	1	1	1	1	Cast
GO:0002268	BP	e	follicular dendritic cell differentiation	1/769	2/32695	0.0465	n.a.	1	1	1	1	Bcl3
GO:0036413	BP	e	histone H3-R26 citrullination	1/769	2/32695	0.0465	n.a.	1	1	1	1	Padi2
GO:0033216	BP	e	ferric iron import	1/769	2/32695	0.0465	n.a.	1	1	1	1	B2m
GO:0060537	BP	e	muscle tissue development	1/769	2/32695	0.0465	n.a.	1	1	1	1	Srpk3
GO:0042537	BP	e	benzene-containing compound metabolic process	1/769	2/32695	0.0465	n.a.	1	1	1	1	Cyp1b1
GO:0032607	BP	e	interferon-alpha production	1/769	2/32695	0.0465	n.a.	1	1	1	1	Irf7
GO:0045048	BP	e	protein insertion into ER membrane	1/769	2/32695	0.0465	n.a.	1	1	1	1	Tram2
GO:0017004	BP	e	cytochrome complex assembly	1/769	2/32695	0.0465	n.a.	1	1	1	1	Cyba
GO:0061643	BP	e	chemorepulsion of axon	1/769	2/32695	0.0465	n.a.	1	1	1	1	Robo3
GO:0034164	BP	e	negative regulation of toll-like receptor 9 signaling pathway	1/769	2/32695	0.0465	n.a.	1	1	1	1	Rab7b
GO:1905065	BP	e	positive regulation of vascular smooth muscle cell differentiation	1/769	2/32695	0.0465	n.a.	1	1	1	1	Eng
GO:1905069	BP	e	allantois development	1/769	2/32695	0.0465	n.a.	1	1	1	1	Bmp7
GO:0061402	BP	e	positive regulation of transcription from RNA polymerase II promoter in response to acidic pH	1/769	2/32695	0.0465	n.a.	1	1	1	1	Slc38a3
GO:0046416	BP	e	D-amino acid metabolic process	1/769	2/32695	0.0465	n.a.	1	1	1	1	Ddo
GO:0098711	BP	e	iron ion import across plasma membrane	1/769	2/32695	0.0465	n.a.	1	1	1	1	Hfe
GO:0046884	BP	e	follicle-stimulating hormone secretion	1/769	2/32695	0.0465	n.a.	1	1	1	1	Cga
GO:0070165	BP	e	positive regulation of adiponectin secretion	1/769	2/32695	0.0465	n.a.	1	1	1	1	Hcar2
GO:0007352	BP	e	zygotic specification of dorsal/ventral axis	1/769	2/32695	0.0465	n.a.	1	1	1	1	Smad6
GO:0033277	BP	e	abortive mitotic cell cycle	1/769	2/32695	0.0465	n.a.	1	1	1	1	Ptpn6
GO:0014734	BP	e	skeletal muscle hypertrophy	1/769	2/32695	0.0465	n.a.	1	1	1	1	Myoc
GO:0061684	BP	e	chaperone-mediated autophagy	1/769	2/32695	0.0465	n.a.	1	1	1	1	Lamp2
GO:0002540	BP	e	leukotriene production involved in inflammatory response	1/769	2/32695	0.0465	n.a.	1	1	1	1	Alox5ap
GO:2001233	BP	e	regulation of apoptotic signaling pathway	1/769	2/32695	0.0465	n.a.	1	1	1	1	Casp8
GO:0002367	BP	e	cytokine production involved in immune response	1/769	2/32695	0.0465	n.a.	1	1	1	1	Mr1
GO:0033484	BP	e	nitric oxide homeostasis	1/769	2/32695	0.0465	n.a.	1	1	1	1	Cav1
GO:0071600	BP	e	otic vesicle morphogenesis	1/769	2/32695	0.0465	n.a.	1	1	1	1	Tbx1
GO:1902023	BP	e	L-arginine transport	1/769	2/32695	0.0465	n.a.	1	1	1	1	Slc11a1
GO:1901253	BP	e	negative regulation of intracellular transport of viral material	1/769	2/32695	0.0465	n.a.	1	1	1	1	Bst2
GO:0003169	BP	e	coronary vein morphogenesis	1/769	2/32695	0.0465	n.a.	1	1	1	1	Vegfa
GO:1904027	BP	e	negative regulation of collagen fibril organization	1/769	2/32695	0.0465	n.a.	1	1	1	1	Emilin1
GO:1990428	BP	e	miRNA transport	1/769	2/32695	0.0465	n.a.	1	1	1	1	Tgfbr2
GO:0015825	BP	e	L-serine transport	1/769	2/32695	0.0465	n.a.	1	1	1	1	Slc1a5
GO:0002344	BP	e	B cell affinity maturation	1/769	2/32695	0.0465	n.a.	1	1	1	1	H2-Ab1
GO:0008049	BP	e	male courtship behavior	1/769	2/32695	0.0465	n.a.	1	1	1	1	Hexb
GO:0032831	BP	e	positive regulation of CD4-positive, CD25-positive, alpha-beta regulatory T cell differentiation	1/769	2/32695	0.0465	n.a.	1	1	1	1	Il2rg
GO:0061740	BP	e	protein targeting to lysosome involved in chaperone-mediated autophagy	1/769	2/32695	0.0465	n.a.	1	1	1	1	Lamp2
GO:0033197	BP	e	response to vitamin E	1/769	2/32695	0.0465	n.a.	1	1	1	1	Eif2ak2
GO:0006528	BP	e	asparagine metabolic process	1/769	2/32695	0.0465	n.a.	1	1	1	1	Aspg
GO:0045082	BP	e	positive regulation of interleukin-10 biosynthetic process	1/769	2/32695	0.0465	n.a.	1	1	1	1	Bcl3
GO:0032764	BP	e	negative regulation of mast cell cytokine production	1/769	2/32695	0.0465	n.a.	1	1	1	1	Hmox1
GO:0032765	BP	e	positive regulation of mast cell cytokine production	1/769	2/32695	0.0465	n.a.	1	1	1	1	Fcer1g
GO:0010810	BP	e	regulation of cell-substrate adhesion	1/769	2/32695	0.0465	n.a.	1	1	1	1	Rac2
GO:1904684	BP	e	negative regulation of metalloendopeptidase activity	1/769	2/32695	0.0465	n.a.	1	1	1	1	Reck
GO:1901534	BP	e	positive regulation of hematopoietic progenitor cell differentiation	1/769	2/32695	0.0465	n.a.	1	1	1	1	Foxc1
GO:0046725	BP	e	negative regulation by virus of viral protein levels in host cell	1/769	2/32695	0.0465	n.a.	1	1	1	1	Stat1
GO:0009258	BP	e	10-formyltetrahydrofolate catabolic process	1/769	2/32695	0.0465	n.a.	1	1	1	1	Aldh1l2
GO:0070434	BP	e	positive regulation of nucleotide-binding oligomerization domain containing 2 signaling pathway	1/769	2/32695	0.0465	n.a.	1	1	1	1	Tlr4
GO:2000256	BP	e	positive regulation of male germ cell proliferation	1/769	2/32695	0.0465	n.a.	1	1	1	1	Il18
GO:0035026	BP	e	leading edge cell differentiation	1/769	2/32695	0.0465	n.a.	1	1	1	1	Dab2
GO:0071918	BP	e	urea transmembrane transport	1/769	2/32695	0.0465	n.a.	1	1	1	1	Slc14a1
GO:0072268	BP	e	pattern specification involved in metanephros development	1/769	2/32695	0.0465	n.a.	1	1	1	1	Foxd1
GO:0090362	BP	e	positive regulation of platelet-derived growth factor production	1/769	2/32695	0.0465	n.a.	1	1	1	1	Ptgs2
GO:0032701	BP	e	negative regulation of interleukin-18 production	1/769	2/32695	0.0465	n.a.	1	1	1	1	Cd84
GO:0032707	BP	e	negative regulation of interleukin-23 production	1/769	2/32695	0.0465	n.a.	1	1	1	1	Tlr4
GO:0061518	BP	e	microglial cell proliferation	1/769	2/32695	0.0465	n.a.	1	1	1	1	Il33
GO:0010255	BP	e	glucose mediated signaling pathway	1/769	2/32695	0.0465	n.a.	1	1	1	1	Mlxipl
GO:0090673	BP	e	endothelial cell-matrix adhesion	1/769	2/32695	0.0465	n.a.	1	1	1	1	Pecam1
GO:0002792	BP	e	negative regulation of peptide secretion	1/769	2/32695	0.0465	n.a.	1	1	1	1	Cd74
GO:0090086	BP	e	negative regulation of protein deubiquitination	1/769	2/32695	0.0465	n.a.	1	1	1	1	Trim21
GO:2000473	BP	e	positive regulation of hematopoietic stem cell migration	1/769	2/32695	0.0465	n.a.	1	1	1	1	Ptprc
GO:0044090	BP	e	positive regulation of vacuole organization	1/769	2/32695	0.0465	n.a.	1	1	1	1	Anxa2
GO:0072136	BP	e	metanephric mesenchymal cell proliferation involved in metanephros development	1/769	2/32695	0.0465	n.a.	1	1	1	1	Bmp7
GO:0072134	BP	e	nephrogenic mesenchyme morphogenesis	1/769	2/32695	0.0465	n.a.	1	1	1	1	Bmp7
GO:1902524	BP	e	positive regulation of protein K48-linked ubiquitination	1/769	2/32695	0.0465	n.a.	1	1	1	1	Nmi
GO:0042488	BP	e	positive regulation of odontogenesis of dentin-containing tooth	1/769	2/32695	0.0465	n.a.	1	1	1	1	Csf1
GO:0042489	BP	e	negative regulation of odontogenesis of dentin-containing tooth	1/769	2/32695	0.0465	n.a.	1	1	1	1	Tnfrsf11b
GO:0009098	BP	e	leucine biosynthetic process	1/769	2/32695	0.0465	n.a.	1	1	1	1	Bcat2
GO:0009099	BP	e	valine biosynthetic process	1/769	2/32695	0.0465	n.a.	1	1	1	1	Bcat2
GO:0032218	BP	e	riboflavin transport	1/769	2/32695	0.0465	n.a.	1	1	1	1	Slc52a3
GO:0010665	BP	e	regulation of cardiac muscle cell apoptotic process	1/769	2/32695	0.0465	n.a.	1	1	1	1	Eng
GO:1990166	BP	e	protein localization to site of double-strand break	1/769	2/32695	0.0465	n.a.	1	1	1	1	Parp3
GO:0086098	BP	e	angiotensin-activated signaling pathway involved in heart process	1/769	2/32695	0.0465	n.a.	1	1	1	1	Cav1
GO:0032231	BP	e	regulation of actin filament bundle assembly	1/769	2/32695	0.0465	n.a.	1	1	1	1	Flna
GO:0006083	BP	e	acetate metabolic process	1/769	2/32695	0.0465	n.a.	1	1	1	1	Aspa
GO:1903691	BP	e	positive regulation of wound healing, spreading of epidermal cells	1/769	2/32695	0.0465	n.a.	1	1	1	1	Rreb1
GO:0042693	BP	e	muscle cell fate commitment	1/769	2/32695	0.0465	n.a.	1	1	1	1	Tbx1
GO:0023057	BP	e	negative regulation of signaling	1/769	2/32695	0.0465	n.a.	1	1	1	1	Mvp
GO:0060242	BP	e	contact inhibition	1/769	2/32695	0.0465	n.a.	1	1	1	1	Tspo
GO:0006601	BP	e	creatine biosynthetic process	1/769	2/32695	0.0465	n.a.	1	1	1	1	Gatm
GO:1903147	BP	e	negative regulation of autophagy of mitochondrion	1/769	2/32695	0.0465	n.a.	1	1	1	1	Tspo
GO:2001150	BP	e	positive regulation of dipeptide transmembrane transport	1/769	2/32695	0.0465	n.a.	1	1	1	1	Car2
GO:0002711	BP	e	positive regulation of T cell mediated immunity	1/769	2/32695	0.0465	n.a.	1	1	1	1	Ptprc
GO:0002717	BP	e	positive regulation of natural killer cell mediated immunity	1/769	2/32695	0.0465	n.a.	1	1	1	1	H2-T23
GO:0038190	BP	e	VEGF-activated neuropilin signaling pathway	1/769	2/32695	0.0465	n.a.	1	1	1	1	Vegfa
GO:0060369	BP	e	positive regulation of Fc receptor mediated stimulatory signaling pathway	1/769	2/32695	0.0465	n.a.	1	1	1	1	Lyn
GO:0032902	BP	e	nerve growth factor production	1/769	2/32695	0.0465	n.a.	1	1	1	1	Pcsk6
GO:0070625	BP	e	zymogen granule exocytosis	1/769	2/32695	0.0465	n.a.	1	1	1	1	Vamp8
GO:0070254	BP	e	mucus secretion	1/769	2/32695	0.0465	n.a.	1	1	1	1	Vamp8
GO:2000811	BP	e	negative regulation of anoikis	2/769	15/32695	0.0474	n.a.	2	1	1	1	Cav1, Itga5
GO:0007342	BP	e	fusion of sperm to egg plasma membrane involved in single fertilization	2/769	15/32695	0.0474	n.a.	2	1	1	1	Cd9, Spaca6
GO:0051044	BP	e	positive regulation of membrane protein ectodomain proteolysis	2/769	15/32695	0.0474	n.a.	2	1	1	1	Snx9, Tnfrsf1b
GO:0032695	BP	e	negative regulation of interleukin-12 production	2/769	15/32695	0.0474	n.a.	2	1	1	1	Irak3, Tlr2
GO:0010524	BP	e	positive regulation of calcium ion transport into cytosol	2/769	15/32695	0.0474	n.a.	2	1	1	1	Cav1, P2rx4
GO:0060411	BP	e	cardiac septum morphogenesis	2/769	15/32695	0.0474	n.a.	2	1	1	1	Bmp7, Jag1
GO:0046888	BP	e	negative regulation of hormone secretion	2/769	15/32695	0.0474	n.a.	2	1	1	1	Edn1, Edn3
GO:0030502	BP	e	negative regulation of bone mineralization	2/769	15/32695	0.0474	n.a.	2	1	1	1	Ecm1, Srgn
GO:0043149	BP	e	stress fiber assembly	2/769	15/32695	0.0474	n.a.	2	1	1	1	Eln, Itgb5
GO:0043069	BP	e	negative regulation of programmed cell death	2/769	15/32695	0.0474	n.a.	2	1	1	1	Plcg2, Vegfa
GO:0050995	BP	e	negative regulation of lipid catabolic process	2/769	15/32695	0.0474	n.a.	2	1	1	1	Hcar1, Hcar2
GO:0032963	BP	e	collagen metabolic process	2/769	15/32695	0.0474	n.a.	2	1	1	1	Tns2, Vps33b
GO:0060445	BP	e	branching involved in salivary gland morphogenesis	2/769	15/32695	0.0474	n.a.	2	1	1	1	Bmp7, Tgm2
GO:0061028	BP	e	establishment of endothelial barrier	2/769	15/32695	0.0474	n.a.	2	1	1	1	Icam1, Msn
GO:0015693	BP	e	magnesium ion transport	2/769	15/32695	0.0474	n.a.	2	1	1	1	Magt1, Nipal4
GO:0050765	BP	e	negative regulation of phagocytosis	2/769	15/32695	0.0474	n.a.	2	1	1	1	Fcgr2b, Tlr2
GO:0048699	BP	e	generation of neurons	2/769	15/32695	0.0474	n.a.	2	1	1	1	Cdh1, Tal1
GO:2000147	BP	e	positive regulation of cell motility	2/769	15/32695	0.0474	n.a.	2	1	1	1	Csf1r, Trf
GO:0030501	BP	e	positive regulation of bone mineralization	3/769	35/32695	0.0486	n.a.	3	1	1	1	Bmp6, Bmp7, Isg15
GO:0043410	BP	e	positive regulation of MAPK cascade	7/769	141/32695	0.0495	n.a.	7	1	1	1	Cd74, Cd84, Csf1r, Igf2, Ptprc, Shc1, Tbx1
GO:0007608	BP	p	sensory perception of smell	0/769	1114/32695	1.53e-06	n.a.	0	0.0181	0.0177	0.018
GO:0008150	BP	p	biological_process	67/769	4370/32695	6.87e-05	n.a.	67	0.816	0.795	0.805	1600023N17Rik, AB124611, AW112010, Adamtsl3, Apold1, Asb11, Bcas1, Cbln3, Cdh19, Clasrp, Cped1, Epsti1, Etnppl, Fam183b, Fbxw15, Firre, Ginm1, Gm14005, Gpr108, Hrct1, Hs3st3a1, Hspa12b, I830077J02Rik, Itpripl2, Lca5l, Leng8, Lhfp, Lipo1, Lrrc25, Lrrc36, Ly6g6f, Mboat1, Ms4a6d, Ms4a7, Mxra8, Olfml1, Olfml3, Parp12, Parvg, Pla1a, Plekha4, Plekhn1, Plekho2, Pnisr, Prickle3, Prr18, Prrg1, Rcn3, Sec14…
GO:0007283	BP	p	spermatogenesis	2/769	413/32695	0.00769	n.a.	2	1	1	1	Mlh1, S100a11
GO:0050896	BP	p	response to stimulus	0/769	208/32695	0.0176	n.a.	0	1	1	1
GO:0006281	BP	p	DNA repair	2/769	326/32695	0.0397	n.a.	2	1	1	1	Eya4, Mlh1
GO:0006412	BP	p	translation	1/769	230/32695	0.048	n.a.	1	1	1	1	Eif2ak2
