# Supplementary material for: Dietary Restriction and Rapamycin Affect Brain Aging in Mice by Attenuating Age-Related DNA Methylation Changes
Source: Genes (Basel). 2022 Apr 15;13(4):699. doi: 10.3390/genes13040699 (PMC9030181; doi:10.3390/genes13040699)
Supplement: Supplementary file 1 [file genes-13-00699-s001.zip › Table S3 - GO Enrichement of RALL-DEGs.xlsx]

## Sheet: GO of RALL-ameliorate UDEGs
# Generated by GOATOOLS v0.8.4 (2021-06-09)
# min_ratio=None pval=0.05
GO	NS	enrichment	name	ratio_in_study	ratio_in_pop	p_uncorrected	depth	study_count	p_bonferroni	p_sidak	p_holm	study_items
GO:0007399	BP	e	nervous system development	17/179	381/32695	2.08e-07	n.a.	17	0.00247	0.00241	0.00247	Chl1, Dcc, Dcx, Dpysl3, Dpysl5, Epha5, Gap43, L1cam, Lmtk2, Mef2c, Nav3, Nr4a2, Pcdh18, Plppr1, Sema6a, Sox11, Tnik
GO:0001764	BP	e	neuron migration	10/179	131/32695	6.73e-07	n.a.	10	0.00799	0.00779	0.00799	Adgrl3, Chl1, Dcc, Dcx, Mef2c, Ndn, Nr4a2, Reln, Satb2, Sema6a
GO:0007275	BP	e	multicellular organism development	23/179	1095/32695	6.84e-07	n.a.	23	0.00812	0.00792	0.00812	Bmp3, Cdh3, Cdh6, Chl1, Dcc, Dcx, Epha5, Epha6, Gap43, Gpr161, L1cam, Lmtk2, Mef2c, Meis2, Mn1, Nog, Reln, Satb2, Sema6a, Six3, Sox11, Tshz2, Vwc2l
GO:0007156	BP	e	homophilic cell adhesion via plasma membrane adhesion molecules	7/179	91/32695	7.2e-07	n.a.	7	0.00855	0.00833	0.00855	Cdh3, Cdh6, Chl1, Igsf21, L1cam, Pcdh18, Tenm3
GO:0007411	BP	e	axon guidance	13/179	134/32695	7.99e-07	n.a.	13	0.00949	0.00925	0.00949	Chl1, Dcc, Dpysl5, Epha5, Gap43, L1cam, Lmtk2, Nog, Nr4a3, Ptpro, Reln, Sema3f, Sema6a
GO:0003211	BP	e	cardiac ventricle formation	3/179	5/32695	1.6e-06	n.a.	3	0.019	0.0185	0.019	Mef2c, Sox11, Sox4
GO:0032098	BP	e	regulation of appetite	3/179	5/32695	1.6e-06	n.a.	3	0.019	0.0185	0.019	Htr2c, Htr4, Pomc
GO:0006811	BP	e	ion transport	14/179	582/32695	4.42e-06	n.a.	14	0.0524	0.0511	0.0524	Cacna2d3, Cacnb2, Clic6, Glra2, Grik3, Grin2b, Kcne2, Kcnf1, Kcnh7, Scn5a, Slc39a10, Slc4a5, Slc4a8, Steap2
GO:0034765	BP	e	regulation of ion transmembrane transport	7/179	136/32695	1.06e-05	n.a.	7	0.125	0.122	0.125	Cacna2d3, Cacnb2, Clic6, Kcne2, Kcnf1, Kcnh7, Scn5a
GO:0045944	BP	e	positive regulation of transcription by RNA polymerase II	19/179	1116/32695	1.3e-05	n.a.	19	0.155	0.151	0.155	Bmp3, Fosb, Foxo6, Klf10, Mef2c, Meis2, Ndn, Nog, Nr4a2, Nr4a3, Nrip1, Per1, Pomc, Satb2, Six3, Sox11, Sox4, Tbl1xr1, Tbr1
GO:0051966	BP	e	regulation of synaptic transmission, glutamatergic	4/179	27/32695	1.38e-05	n.a.	4	0.164	0.16	0.164	Grm2, Homer1, Mef2c, Nlgn3
GO:0048675	BP	e	axon extension	4/179	30/32695	2.13e-05	n.a.	4	0.253	0.246	0.253	Dcx, Ndn, Nlgn3, Raph1
GO:0007612	BP	e	learning	5/179	64/32695	2.73e-05	n.a.	5	0.324	0.316	0.324	Cntnap2, Grin2b, Nlgn3, Prkar2b, Reln
GO:0014728	BP	e	regulation of the force of skeletal muscle contraction	2/179	2/32695	2.98e-05	n.a.	2	0.354	0.345	0.353	Actn3, Myh7
GO:0007155	BP	e	cell adhesion	12/179	518/32695	3.13e-05	n.a.	12	0.372	0.362	0.371	Cdh3, Cdh6, Chl1, Cntnap2, L1cam, Ncan, Negr1, Nlgn3, Pcdh18, Reln, Tenm3, Tnc
GO:0030534	BP	e	adult behavior	4/179	35/32695	3.98e-05	n.a.	4	0.473	0.461	0.472	Cntnap2, Fgfbp3, Nlgn3, Nr4a3
GO:0048011	BP	e	neurotrophin TRK receptor signaling pathway	3/179	15/32695	7e-05	n.a.	3	0.83	0.81	0.829	Casp3, Lmtk2, Ndn
GO:0006355	BP	e	regulation of transcription, DNA-templated	25/179	1934/32695	7.53e-05	n.a.	25	0.894	0.871	0.892	Cbx2, Cux2, Dmrta2, Fosb, Foxo6, Kdm5b, Klf10, Mef2c, Meis2, Mn1, Ndn, Nr4a2, Nr4a3, Nrip1, Per1, Rcor2, Satb2, Six3, Sox11, Sox4, Tbl1xr1, Tbr1, Tenm1, Tox3, Tshz2
GO:2000310	BP	e	regulation of NMDA receptor activity	3/179	16/32695	8.57e-05	n.a.	3	1	0.992	1	Mef2c, Nlgn3, Reln
GO:0007216	BP	e	G-protein coupled glutamate receptor signaling pathway	3/179	16/32695	8.57e-05	n.a.	3	1	0.992	1	Grik3, Grm2, Homer1
GO:0098912	BP	e	membrane depolarization during atrial cardiac muscle cell action potential	2/179	3/32695	8.91e-05	n.a.	2	1	1	1	Cacnb2, Scn5a
GO:0007157	BP	e	heterophilic cell-cell adhesion via plasma membrane cell adhesion molecules	4/179	44/32695	9.94e-05	n.a.	4	1	1	1	Igsf21, L1cam, Tenm1, Tenm3
GO:0006351	BP	e	transcription, DNA-templated	24/179	1841/32695	0.000102	n.a.	24	1	1	1	Cbx2, Cux2, Foxo6, Kdm5b, Klf10, Mef2c, Meis2, Mn1, Ndn, Nr4a2, Nr4a3, Nrip1, Per1, Rcor2, Satb2, Six3, Sox11, Sox4, Tbl1xr1, Tbr1, Tenm1, Tox3, Tshz2, Zfp184
GO:0021510	BP	e	spinal cord development	3/179	18/32695	0.000124	n.a.	3	1	1	1	Nog, Sox11, Sox4
GO:0000122	BP	e	negative regulation of transcription by RNA polymerase II	14/179	807/32695	0.000155	n.a.	14	1	1	1	Cbx2, Cux2, Foxo6, Mef2c, Nog, Nr4a2, Nr4a3, Nrip1, Per1, Satb2, Sox11, Sox4, Tbl1xr1, Wfs1
GO:0071376	BP	e	cellular response to corticotropin-releasing hormone stimulus	2/179	4/32695	0.000178	n.a.	2	1	1	1	Nr4a2, Nr4a3
GO:0003357	BP	e	noradrenergic neuron differentiation	2/179	4/32695	0.000178	n.a.	2	1	1	1	Sox11, Sox4
GO:0030154	BP	e	cell differentiation	15/179	932/32695	0.000203	n.a.	15	1	1	1	Bmp3, Chl1, Cpne5, Dcx, Epha5, Epha6, Gap43, L1cam, Lmtk2, Mef2c, Nog, Sema6a, Sox11, Sox4, Tenm3
GO:0007420	BP	e	brain development	6/179	160/32695	0.000262	n.a.	6	1	1	1	Adgrl3, Dcx, Nog, Pcdh18, Reln, Six3
GO:0007626	BP	e	locomotory behavior	5/179	105/32695	0.000289	n.a.	5	1	1	1	Gpr88, Htr2c, Negr1, Olfm2, Reln
GO:0043524	BP	e	negative regulation of neuron apoptotic process	6/179	163/32695	0.000289	n.a.	6	1	1	1	Chl1, Mef2c, Nr4a2, Nr4a3, Tox3, Wfs1
GO:0021766	BP	e	hippocampus development	4/179	58/32695	0.000293	n.a.	4	1	1	1	Dcx, Epha5, Nr4a3, Reln
GO:0014009	BP	e	glial cell proliferation	2/179	5/32695	0.000295	n.a.	2	1	1	1	Sox11, Sox4
GO:0086045	BP	e	membrane depolarization during AV node cell action potential	2/179	5/32695	0.000295	n.a.	2	1	1	1	Cacnb2, Scn5a
GO:0071277	BP	e	cellular response to calcium ion	4/179	61/32695	0.000355	n.a.	4	1	1	1	Cpne5, Fosb, Mef2c, Scn5a
GO:0008542	BP	e	visual learning	4/179	64/32695	0.000427	n.a.	4	1	1	1	Meis2, Nlgn3, Nog, Nts
GO:0021782	BP	e	glial cell development	2/179	6/32695	0.000441	n.a.	2	1	1	1	Sox11, Sox4
GO:0014894	BP	e	response to denervation involved in regulation of muscle adaptation	2/179	6/32695	0.000441	n.a.	2	1	1	1	Actn3, Scn5a
GO:0001649	BP	e	osteoblast differentiation	4/179	65/32695	0.000453	n.a.	4	1	1	1	Actn3, Bmp3, Mef2c, Nog
GO:0055085	BP	e	transmembrane transport	9/179	410/32695	0.000458	n.a.	9	1	1	1	Abcg4, Aqp1, Kcnf1, Kcnh7, Scn5a, Slc25a30, Slc29a4, Slc35f1, Slc39a10
GO:0048666	BP	e	neuron development	4/179	66/32695	0.00048	n.a.	4	1	1	1	Mef2c, Ndn, Tenm1, Tenm3
GO:0007268	BP	e	chemical synaptic transmission	6/179	184/32695	0.00055	n.a.	6	1	1	1	Cacnb2, Glra2, Grin2b, Grm2, Htr2c, Htr4
GO:0051928	BP	e	positive regulation of calcium ion transport	3/179	30/32695	0.000588	n.a.	3	1	1	1	Cacnb2, Homer1, Wfs1
GO:0021902	BP	e	commitment of neuronal cell to specific neuron type in forebrain	2/179	7/32695	0.000615	n.a.	2	1	1	1	Satb2, Tbr1
GO:0016338	BP	e	calcium-independent cell-cell adhesion via plasma membrane cell-adhesion molecules	2/179	7/32695	0.000615	n.a.	2	1	1	1	Cldn1, Cldn2
GO:0055074	BP	e	calcium ion homeostasis	3/179	31/32695	0.000648	n.a.	3	1	1	1	Kl, Scn5a, Wfs1
GO:0048511	BP	e	rhythmic process	5/179	126/32695	0.000666	n.a.	5	1	1	1	Grin2b, Kdm5b, Klf10, Nrip1, Per1
GO:2000463	BP	e	positive regulation of excitatory postsynaptic potential	3/179	33/32695	0.00078	n.a.	3	1	1	1	Cux2, Nlgn3, Reln
GO:0086091	BP	e	regulation of heart rate by cardiac conduction	3/179	33/32695	0.00078	n.a.	3	1	1	1	Cacnb2, Kcne2, Scn5a
GO:0042593	BP	e	glucose homeostasis	5/179	131/32695	0.000793	n.a.	5	1	1	1	Foxo6, Pomc, Ppp1r3g, Sox4, Wfs1
GO:1902667	BP	e	regulation of axon guidance	2/179	8/32695	0.000817	n.a.	2	1	1	1	Tbr1, Zswim6
GO:0007623	BP	e	circadian rhythm	4/179	76/32695	0.00082	n.a.	4	1	1	1	Klf10, Per1, Prkg2, Prokr2
GO:0048812	BP	e	neuron projection morphogenesis	4/179	76/32695	0.00082	n.a.	4	1	1	1	Cntnap2, Myo16, Tnik, Zswim6
GO:0030182	BP	e	neuron differentiation	5/179	136/32695	0.000939	n.a.	5	1	1	1	Casp3, Mef2c, Nr4a2, Sox11, Tbr1
GO:0007218	BP	e	neuropeptide signaling pathway	4/179	80/32695	0.000994	n.a.	4	1	1	1	Glra2, Pomc, Sstr4, Tenm1
GO:0010035	BP	e	response to inorganic substance	2/179	9/32695	0.00105	n.a.	2	1	1	1	Nr4a2, Pgam2
GO:2000969	BP	e	positive regulation of AMPA receptor activity	2/179	9/32695	0.00105	n.a.	2	1	1	1	Nlgn3, Reln
GO:0042421	BP	e	norepinephrine biosynthetic process	2/179	9/32695	0.00105	n.a.	2	1	1	1	Kl, Moxd1
GO:0016339	BP	e	calcium-dependent cell-cell adhesion via plasma membrane cell adhesion molecules	3/179	37/32695	0.00109	n.a.	3	1	1	1	Cdh3, Cdh6, Pcdh18
GO:0060079	BP	e	excitatory postsynaptic potential	3/179	37/32695	0.00109	n.a.	3	1	1	1	Grin2b, Mef2c, Nlgn3
GO:0008306	BP	e	associative learning	3/179	37/32695	0.00109	n.a.	3	1	1	1	Grin2b, Nptx2, Reln
GO:0001654	BP	e	eye development	3/179	39/32695	0.00128	n.a.	3	1	1	1	Meis2, Six3, Sox11
GO:0045786	BP	e	negative regulation of cell cycle	3/179	39/32695	0.00128	n.a.	3	1	1	1	Brinp2, Casp3, Rps6ka2
GO:0014883	BP	e	transition between fast and slow fiber	2/179	10/32695	0.0013	n.a.	2	1	1	1	Actn3, Myh7
GO:0051764	BP	e	actin crosslink formation	2/179	10/32695	0.0013	n.a.	2	1	1	1	Dpysl3, Marcks
GO:0061626	BP	e	pharyngeal arch artery morphogenesis	2/179	10/32695	0.0013	n.a.	2	1	1	1	Folr1, Nog
GO:0060563	BP	e	neuroepithelial cell differentiation	2/179	10/32695	0.0013	n.a.	2	1	1	1	Sox11, Sox4
GO:0010976	BP	e	positive regulation of neuron projection development	5/179	150/32695	0.00145	n.a.	5	1	1	1	Dcc, Dpysl3, Negr1, Reln, Tenm3
GO:0007417	BP	e	central nervous system development	4/179	89/32695	0.00148	n.a.	4	1	1	1	Ncan, Ndn, Nog, Reln
GO:0060412	BP	e	ventricular septum morphogenesis	3/179	42/32695	0.00158	n.a.	3	1	1	1	Nog, Sox11, Sox4
GO:0071310	BP	e	cellular response to organic substance	3/179	42/32695	0.00158	n.a.	3	1	1	1	Casp3, Cux2, Satb2
GO:0031103	BP	e	axon regeneration	2/179	11/32695	0.00159	n.a.	2	1	1	1	Folr1, Nrep
GO:0060174	BP	e	limb bud formation	2/179	11/32695	0.00159	n.a.	2	1	1	1	Sox11, Sox4
GO:0006357	BP	e	regulation of transcription by RNA polymerase II	9/179	492/32695	0.00164	n.a.	9	1	1	1	Brwd3, Fosb, Foxo6, Klf10, Nrip1, Rcor2, Satb2, Tbl1xr1, Tshz2
GO:0001662	BP	e	behavioral fear response	3/179	43/32695	0.0017	n.a.	3	1	1	1	Grin2b, Htr2c, Lypd1
GO:0070374	BP	e	positive regulation of ERK1 and ERK2 cascade	6/179	233/32695	0.00185	n.a.	6	1	1	1	Dcc, Epha5, Epha6, Fgfbp3, Htr2c, Lmtk2
GO:0010468	BP	e	regulation of gene expression	7/179	316/32695	0.00186	n.a.	7	1	1	1	Nr4a2, Reln, Satb2, Slc4a5, Tbl1xr1, Tbr1, Tshz2
GO:0006182	BP	e	cGMP biosynthetic process	2/179	12/32695	0.0019	n.a.	2	1	1	1	Aqp1, Htr2c
GO:0071625	BP	e	vocalization behavior	2/179	12/32695	0.0019	n.a.	2	1	1	1	Cntnap2, Nlgn3
GO:0021952	BP	e	central nervous system projection neuron axonogenesis	2/179	12/32695	0.0019	n.a.	2	1	1	1	Dcx, Nr4a2
GO:0035019	BP	e	somatic stem cell population maintenance	3/179	45/32695	0.00193	n.a.	3	1	1	1	Klf10, Nog, Sox4
GO:0071300	BP	e	cellular response to retinoic acid	3/179	45/32695	0.00193	n.a.	3	1	1	1	Aqp1, Brinp2, Mef2c
GO:0031175	BP	e	neuron projection development	5/179	161/32695	0.00198	n.a.	5	1	1	1	Chl1, Cntnap2, L1cam, Nptx2, Tnc
GO:0086005	BP	e	ventricular cardiac muscle cell action potential	2/179	13/32695	0.00223	n.a.	2	1	1	1	Kcne2, Scn5a
GO:0086002	BP	e	cardiac muscle cell action potential involved in contraction	2/179	13/32695	0.00223	n.a.	2	1	1	1	Kcne2, Scn5a
GO:0042752	BP	e	regulation of circadian rhythm	3/179	49/32695	0.00247	n.a.	3	1	1	1	Kdm5b, Klf10, Per1
GO:0007165	BP	e	signal transduction	16/179	1261/32695	0.00247	n.a.	16	1	1	1	Adgrl3, Arhgap36, Glra2, Gpr161, Gpr17, Gpr88, Grm2, Htr2c, Htr4, Plppr1, Pomc, Prokr2, Rrad, Sstr4, Tenm1, Tenm3
GO:0021819	BP	e	layer formation in cerebral cortex	2/179	14/32695	0.0026	n.a.	2	1	1	1	Dcx, Reln
GO:0060307	BP	e	regulation of ventricular cardiac muscle cell membrane repolarization	2/179	14/32695	0.0026	n.a.	2	1	1	1	Kcne2, Scn5a
GO:0042417	BP	e	dopamine metabolic process	2/179	14/32695	0.0026	n.a.	2	1	1	1	Nr4a2, Sncaip
GO:0030514	BP	e	negative regulation of BMP signaling pathway	3/179	51/32695	0.00277	n.a.	3	1	1	1	Nog, Sostdc1, Vwc2l
GO:0043171	BP	e	peptide catabolic process	2/179	15/32695	0.00299	n.a.	2	1	1	1	Ide, Lnpep
GO:0032793	BP	e	positive regulation of CREB transcription factor activity	2/179	15/32695	0.00299	n.a.	2	1	1	1	Epha5, Reln
GO:0043069	BP	e	negative regulation of programmed cell death	2/179	15/32695	0.00299	n.a.	2	1	1	1	Tmem132a, Wfs1
GO:0048678	BP	e	response to axon injury	2/179	15/32695	0.00299	n.a.	2	1	1	1	Dpysl3, Folr1
GO:0045666	BP	e	positive regulation of neuron differentiation	4/179	108/32695	0.00299	n.a.	4	1	1	1	Brinp2, Mef2c, Sox11, Vwc2l
GO:0001501	BP	e	skeletal system development	4/179	109/32695	0.00309	n.a.	4	1	1	1	Ncan, Nog, Sox11, Sox4
GO:0035914	BP	e	skeletal muscle cell differentiation	3/179	54/32695	0.00326	n.a.	3	1	1	1	Dmrta2, Mef2c, Sox11
GO:0061053	BP	e	somite development	2/179	16/32695	0.0034	n.a.	2	1	1	1	Nog, Sox11
GO:0003151	BP	e	outflow tract morphogenesis	3/179	55/32695	0.00344	n.a.	3	1	1	1	Mef2c, Nog, Sox11
GO:0048704	BP	e	embryonic skeletal system morphogenesis	3/179	56/32695	0.00362	n.a.	3	1	1	1	Mef2c, Satb2, Sox11
GO:0050804	BP	e	modulation of chemical synaptic transmission	3/179	56/32695	0.00362	n.a.	3	1	1	1	Grik3, Nlgn3, Reln
GO:0010628	BP	e	positive regulation of gene expression	8/179	453/32695	0.00365	n.a.	8	1	1	1	Cdh3, Cux2, Kdm5b, Mef2c, Nog, Rps6ka2, Sox11, Tnc
GO:0048485	BP	e	sympathetic nervous system development	2/179	17/32695	0.00384	n.a.	2	1	1	1	Sox11, Sox4
GO:0035418	BP	e	protein localization to synapse	2/179	17/32695	0.00384	n.a.	2	1	1	1	Homer1, Reln
GO:0007187	BP	e	G-protein coupled receptor signaling pathway, coupled to cyclic nucleotide second messenger	3/179	58/32695	0.00399	n.a.	3	1	1	1	Htr2c, Htr4, Sstr4
GO:0032922	BP	e	circadian regulation of gene expression	3/179	59/32695	0.00419	n.a.	3	1	1	1	Nrip1, Per1, Prkg2
GO:0007611	BP	e	learning or memory	3/179	59/32695	0.00419	n.a.	3	1	1	1	Casp3, Grin2b, Mef2c
GO:0017015	BP	e	regulation of transforming growth factor beta receptor signaling pathway	2/179	18/32695	0.0043	n.a.	2	1	1	1	Folr1, Nrep
GO:0001841	BP	e	neural tube formation	2/179	18/32695	0.0043	n.a.	2	1	1	1	Sox11, Sox4
GO:0014898	BP	e	cardiac muscle hypertrophy in response to stress	2/179	18/32695	0.0043	n.a.	2	1	1	1	Mef2c, Myh7
GO:0007413	BP	e	axonal fasciculation	2/179	19/32695	0.00479	n.a.	2	1	1	1	L1cam, Ndn
GO:0003009	BP	e	skeletal muscle contraction	2/179	20/32695	0.00531	n.a.	2	1	1	1	Homer1, Myh7
GO:1902910	BP	e	positive regulation of melanosome transport	1/179	1/32695	0.00547	n.a.	1	1	1	1	Cdh3
GO:2000108	BP	e	positive regulation of leukocyte apoptotic process	1/179	1/32695	0.00547	n.a.	1	1	1	1	Nr4a3
GO:0060901	BP	e	regulation of hair cycle by canonical Wnt signaling pathway	1/179	1/32695	0.00547	n.a.	1	1	1	1	Cdh3
GO:2000313	BP	e	regulation of fibroblast growth factor receptor signaling pathway involved in neural plate anterior/posterior pattern formation	1/179	1/32695	0.00547	n.a.	1	1	1	1	Nog
GO:1902078	BP	e	positive regulation of lateral motor column neuron migration	1/179	1/32695	0.00547	n.a.	1	1	1	1	Reln
GO:2001226	BP	e	negative regulation of chloride transport	1/179	1/32695	0.00547	n.a.	1	1	1	1	Prkg2
GO:0090193	BP	e	positive regulation of glomerulus development	1/179	1/32695	0.00547	n.a.	1	1	1	1	Nog
GO:0038097	BP	e	positive regulation of mast cell activation by Fc-epsilon receptor signaling pathway	1/179	1/32695	0.00547	n.a.	1	1	1	1	Nr4a3
GO:0061772	BP	e	drug transport across blood-nerve barrier	1/179	1/32695	0.00547	n.a.	1	1	1	1	Cldn1
GO:0060648	BP	e	mammary gland bud morphogenesis	1/179	1/32695	0.00547	n.a.	1	1	1	1	Sostdc1
GO:0072230	BP	e	metanephric proximal straight tubule development	1/179	1/32695	0.00547	n.a.	1	1	1	1	Aqp1
GO:0072232	BP	e	metanephric proximal convoluted tubule segment 2 development	1/179	1/32695	0.00547	n.a.	1	1	1	1	Aqp1
GO:0032773	BP	e	positive regulation of monophenol monooxygenase activity	1/179	1/32695	0.00547	n.a.	1	1	1	1	Cdh3
GO:0008627	BP	e	intrinsic apoptotic signaling pathway in response to osmotic stress	1/179	1/32695	0.00547	n.a.	1	1	1	1	Casp3
GO:0003138	BP	e	primary heart field specification	1/179	1/32695	0.00547	n.a.	1	1	1	1	Mef2c
GO:0003185	BP	e	sinoatrial valve morphogenesis	1/179	1/32695	0.00547	n.a.	1	1	1	1	Mef2c
GO:0106089	BP	e	negative regulation of cell adhesion involved in sprouting angiogenesis	1/179	1/32695	0.00547	n.a.	1	1	1	1	Sema6a
GO:1902159	BP	e	regulation of cyclic nucleotide-gated ion channel activity	1/179	1/32695	0.00547	n.a.	1	1	1	1	Kcne2
GO:0031644	BP	e	regulation of neurological system process	1/179	1/32695	0.00547	n.a.	1	1	1	1	Htr2c
GO:0031646	BP	e	positive regulation of neurological system process	1/179	1/32695	0.00547	n.a.	1	1	1	1	Fgfbp3
GO:2000761	BP	e	positive regulation of N-terminal peptidyl-lysine acetylation	1/179	1/32695	0.00547	n.a.	1	1	1	1	Sox4
GO:0061713	BP	e	anterior neural tube closure	1/179	1/32695	0.00547	n.a.	1	1	1	1	Folr1
GO:1901979	BP	e	regulation of inward rectifier potassium channel activity	1/179	1/32695	0.00547	n.a.	1	1	1	1	Kcne2
GO:0009946	BP	e	proximal/distal axis specification	1/179	1/32695	0.00547	n.a.	1	1	1	1	Six3
GO:0035378	BP	e	carbon dioxide transmembrane transport	1/179	1/32695	0.00547	n.a.	1	1	1	1	Aqp1
GO:0051796	BP	e	negative regulation of timing of catagen	1/179	1/32695	0.00547	n.a.	1	1	1	1	Cdh3
GO:0051866	BP	e	general adaptation syndrome	1/179	1/32695	0.00547	n.a.	1	1	1	1	Nr4a2
GO:0021511	BP	e	spinal cord patterning	1/179	1/32695	0.00547	n.a.	1	1	1	1	Reln
GO:0043397	BP	e	regulation of corticotropin-releasing hormone secretion	1/179	1/32695	0.00547	n.a.	1	1	1	1	Htr2c
GO:2000864	BP	e	regulation of estradiol secretion	1/179	1/32695	0.00547	n.a.	1	1	1	1	Kdm5b
GO:0090257	BP	e	regulation of muscle system process	1/179	1/32695	0.00547	n.a.	1	1	1	1	Actn3
GO:1905929	BP	e	positive regulation of invadopodium disassembly	1/179	1/32695	0.00547	n.a.	1	1	1	1	Nav3
GO:0010092	BP	e	specification of animal organ identity	1/179	1/32695	0.00547	n.a.	1	1	1	1	Tbr1
GO:0003147	BP	e	neural crest cell migration involved in heart formation	1/179	1/32695	0.00547	n.a.	1	1	1	1	Folr1
GO:1904025	BP	e	positive regulation of glucose catabolic process to lactate via pyruvate	1/179	1/32695	0.00547	n.a.	1	1	1	1	Actn3
GO:0017085	BP	e	response to insecticide	1/179	1/32695	0.00547	n.a.	1	1	1	1	Nr4a2
GO:1901987	BP	e	regulation of cell cycle phase transition	1/179	1/32695	0.00547	n.a.	1	1	1	1	Six3
GO:0036060	BP	e	slit diaphragm assembly	1/179	1/32695	0.00547	n.a.	1	1	1	1	Ptpro
GO:0072220	BP	e	metanephric descending thin limb development	1/179	1/32695	0.00547	n.a.	1	1	1	1	Aqp1
GO:0060825	BP	e	fibroblast growth factor receptor signaling pathway involved in neural plate anterior/posterior pattern formation	1/179	1/32695	0.00547	n.a.	1	1	1	1	Nog
GO:1903615	BP	e	positive regulation of protein tyrosine phosphatase activity	1/179	1/32695	0.00547	n.a.	1	1	1	1	Slc39a10
GO:0045137	BP	e	development of primary sexual characteristics	1/179	1/32695	0.00547	n.a.	1	1	1	1	Cbx2
GO:0033059	BP	e	cellular pigmentation	1/179	1/32695	0.00547	n.a.	1	1	1	1	Pomc
GO:1903385	BP	e	regulation of homophilic cell adhesion	1/179	1/32695	0.00547	n.a.	1	1	1	1	Tenm3
GO:1905174	BP	e	regulation of vascular smooth muscle cell dedifferentiation	1/179	1/32695	0.00547	n.a.	1	1	1	1	Olfm2
GO:0033036	BP	e	macromolecule localization	1/179	1/32695	0.00547	n.a.	1	1	1	1	Lbp
GO:0031449	BP	e	regulation of slow-twitch skeletal muscle fiber contraction	1/179	1/32695	0.00547	n.a.	1	1	1	1	Myh7
GO:0085018	BP	e	maintenance of symbiont-containing vacuole by host	1/179	1/32695	0.00547	n.a.	1	1	1	1	Aqp1
GO:0060739	BP	e	mesenchymal-epithelial cell signaling involved in prostate gland development	1/179	1/32695	0.00547	n.a.	1	1	1	1	Tnc
GO:0009444	BP	e	pyruvate oxidation	1/179	1/32695	0.00547	n.a.	1	1	1	1	Nr4a3
GO:0010001	BP	e	glial cell differentiation	2/179	21/32695	0.00585	n.a.	2	1	1	1	Gap43, Reln
GO:0006941	BP	e	striated muscle contraction	2/179	21/32695	0.00585	n.a.	2	1	1	1	Myh7, Pgam2
GO:0006813	BP	e	potassium ion transport	4/179	131/32695	0.00594	n.a.	4	1	1	1	Aqp1, Kcne2, Kcnf1, Kcnh7
GO:0033674	BP	e	positive regulation of kinase activity	3/179	69/32695	0.00649	n.a.	3	1	1	1	Epha5, Epha6, Lmtk2
GO:2000311	BP	e	regulation of AMPA receptor activity	2/179	23/32695	0.00699	n.a.	2	1	1	1	Mef2c, Nlgn3
GO:0015701	BP	e	bicarbonate transport	2/179	23/32695	0.00699	n.a.	2	1	1	1	Slc4a5, Slc4a8
GO:0051216	BP	e	cartilage development	3/179	71/32695	0.00702	n.a.	3	1	1	1	Bmp3, Nog, Satb2
GO:0051965	BP	e	positive regulation of synapse assembly	3/179	73/32695	0.00758	n.a.	3	1	1	1	Adgrl3, Cux2, Nlgn3
GO:0046928	BP	e	regulation of neurotransmitter secretion	2/179	24/32695	0.0076	n.a.	2	1	1	1	Mef2c, Sncaip
GO:1900273	BP	e	positive regulation of long-term synaptic potentiation	2/179	24/32695	0.0076	n.a.	2	1	1	1	Grin2b, Reln
GO:0044331	BP	e	cell-cell adhesion mediated by cadherin	2/179	24/32695	0.0076	n.a.	2	1	1	1	Cdh3, Cdh6
GO:0060425	BP	e	lung morphogenesis	2/179	24/32695	0.0076	n.a.	2	1	1	1	Nog, Sox11
GO:0061003	BP	e	positive regulation of dendritic spine morphogenesis	2/179	24/32695	0.0076	n.a.	2	1	1	1	Cux2, Reln
GO:0048593	BP	e	camera-type eye morphogenesis	2/179	24/32695	0.0076	n.a.	2	1	1	1	Aqp1, Tenm3
GO:0050679	BP	e	positive regulation of epithelial cell proliferation	3/179	75/32695	0.00816	n.a.	3	1	1	1	Nog, Nr4a3, Scn5a
GO:0021983	BP	e	pituitary gland development	2/179	25/32695	0.00823	n.a.	2	1	1	1	Nog, Six3
GO:0010613	BP	e	positive regulation of cardiac muscle hypertrophy	2/179	25/32695	0.00823	n.a.	2	1	1	1	Mef2c, Nr4a3
GO:0051260	BP	e	protein homooligomerization	5/179	227/32695	0.00843	n.a.	5	1	1	1	Cldn1, Dpysl3, Ide, Kcnf1, Marcks
GO:0040008	BP	e	regulation of growth	3/179	76/32695	0.00847	n.a.	3	1	1	1	Gap43, Ndn, Zmat3
GO:0045165	BP	e	cell fate commitment	3/179	78/32695	0.00909	n.a.	3	1	1	1	Casp3, Gap43, Mef2c
GO:0048843	BP	e	negative regulation of axon extension involved in axon guidance	2/179	27/32695	0.00956	n.a.	2	1	1	1	Sema3f, Sema6a
GO:0001782	BP	e	B cell homeostasis	2/179	28/32695	0.0103	n.a.	2	1	1	1	Casp3, Mef2c
GO:0071542	BP	e	dopaminergic neuron differentiation	2/179	28/32695	0.0103	n.a.	2	1	1	1	Dmrta2, Nr4a2
GO:0060265	BP	e	positive regulation of respiratory burst involved in inflammatory response	1/179	2/32695	0.0109	n.a.	1	1	1	1	Lbp
GO:0016198	BP	e	axon choice point recognition	1/179	2/32695	0.0109	n.a.	1	1	1	1	Gap43
GO:2000852	BP	e	regulation of corticosterone secretion	1/179	2/32695	0.0109	n.a.	1	1	1	1	Pomc
GO:0060302	BP	e	negative regulation of cytokine activity	1/179	2/32695	0.0109	n.a.	1	1	1	1	Nog
GO:0099566	BP	e	regulation of postsynaptic cytosolic calcium ion concentration	1/179	2/32695	0.0109	n.a.	1	1	1	1	Grin2b
GO:0030185	BP	e	nitric oxide transport	1/179	2/32695	0.0109	n.a.	1	1	1	1	Aqp1
GO:0072239	BP	e	metanephric glomerulus vasculature development	1/179	2/32695	0.0109	n.a.	1	1	1	1	Aqp1
GO:0031583	BP	e	phospholipase D-activating G-protein coupled receptor signaling pathway	1/179	2/32695	0.0109	n.a.	1	1	1	1	Htr2c
GO:0034349	BP	e	glial cell apoptotic process	1/179	2/32695	0.0109	n.a.	1	1	1	1	Casp3
GO:0003097	BP	e	renal water transport	1/179	2/32695	0.0109	n.a.	1	1	1	1	Aqp1
GO:0008038	BP	e	neuron recognition	1/179	2/32695	0.0109	n.a.	1	1	1	1	Cntnap2
GO:0007521	BP	e	muscle cell fate determination	1/179	2/32695	0.0109	n.a.	1	1	1	1	Mef2c
GO:0048875	BP	e	chemical homeostasis within a tissue	1/179	2/32695	0.0109	n.a.	1	1	1	1	Homer1
GO:0035332	BP	e	positive regulation of hippo signaling	1/179	2/32695	0.0109	n.a.	1	1	1	1	Sox11
GO:0072160	BP	e	nephron tubule epithelial cell differentiation	1/179	2/32695	0.0109	n.a.	1	1	1	1	Mef2c
GO:1900159	BP	e	positive regulation of bone mineralization involved in bone maturation	1/179	2/32695	0.0109	n.a.	1	1	1	1	Actn3
GO:1901143	BP	e	insulin catabolic process	1/179	2/32695	0.0109	n.a.	1	1	1	1	Ide
GO:0035377	BP	e	transepithelial water transport	1/179	2/32695	0.0109	n.a.	1	1	1	1	Aqp1
GO:1905006	BP	e	negative regulation of epithelial to mesenchymal transition involved in endocardial cushion formation	1/179	2/32695	0.0109	n.a.	1	1	1	1	Nog
GO:0032912	BP	e	negative regulation of transforming growth factor beta2 production	1/179	2/32695	0.0109	n.a.	1	1	1	1	Cdh3
GO:0014732	BP	e	skeletal muscle atrophy	1/179	2/32695	0.0109	n.a.	1	1	1	1	Actn3
GO:0086043	BP	e	bundle of His cell action potential	1/179	2/32695	0.0109	n.a.	1	1	1	1	Scn5a
GO:0032765	BP	e	positive regulation of mast cell cytokine production	1/179	2/32695	0.0109	n.a.	1	1	1	1	Nr4a3
GO:0014016	BP	e	neuroblast differentiation	1/179	2/32695	0.0109	n.a.	1	1	1	1	Six3
GO:0071231	BP	e	cellular response to folic acid	1/179	2/32695	0.0109	n.a.	1	1	1	1	Folr1
GO:1903892	BP	e	negative regulation of ATF6-mediated unfolded protein response	1/179	2/32695	0.0109	n.a.	1	1	1	1	Wfs1
GO:1902692	BP	e	regulation of neuroblast proliferation	1/179	2/32695	0.0109	n.a.	1	1	1	1	Six3
GO:0051458	BP	e	corticotropin secretion	1/179	2/32695	0.0109	n.a.	1	1	1	1	Aqp1
GO:0090083	BP	e	regulation of inclusion body assembly	1/179	2/32695	0.0109	n.a.	1	1	1	1	Sncaip
GO:2001111	BP	e	positive regulation of lens epithelial cell proliferation	1/179	2/32695	0.0109	n.a.	1	1	1	1	Sox11
GO:0032490	BP	e	detection of molecule of bacterial origin	1/179	2/32695	0.0109	n.a.	1	1	1	1	Lbp
GO:0021761	BP	e	limbic system development	1/179	2/32695	0.0109	n.a.	1	1	1	1	Cntnap2
GO:0015920	BP	e	lipopolysaccharide transport	1/179	2/32695	0.0109	n.a.	1	1	1	1	Lbp
GO:1904879	BP	e	positive regulation of calcium ion transmembrane transport via high voltage-gated calcium channel	1/179	2/32695	0.0109	n.a.	1	1	1	1	Cacnb2
GO:0061386	BP	e	closure of optic fissure	1/179	2/32695	0.0109	n.a.	1	1	1	1	Sox11
GO:0003404	BP	e	optic vesicle morphogenesis	1/179	2/32695	0.0109	n.a.	1	1	1	1	Six3
GO:0044241	BP	e	lipid digestion	1/179	2/32695	0.0109	n.a.	1	1	1	1	Aqp1
GO:0034332	BP	e	adherens junction organization	2/179	29/32695	0.011	n.a.	2	1	1	1	Cdh3, Cdh6
GO:0007631	BP	e	feeding behavior	2/179	30/32695	0.0117	n.a.	2	1	1	1	Htr2c, Negr1
GO:2001234	BP	e	negative regulation of apoptotic signaling pathway	2/179	30/32695	0.0117	n.a.	2	1	1	1	Nog, Nr4a2
GO:0050919	BP	e	negative chemotaxis	2/179	30/32695	0.0117	n.a.	2	1	1	1	Sema3f, Sema6a
GO:0019228	BP	e	neuronal action potential	2/179	31/32695	0.0125	n.a.	2	1	1	1	Gpr88, Scn5a
GO:0051968	BP	e	positive regulation of synaptic transmission, glutamatergic	2/179	32/32695	0.0133	n.a.	2	1	1	1	Nlgn3, Reln
GO:0002027	BP	e	regulation of heart rate	2/179	32/32695	0.0133	n.a.	2	1	1	1	Myh7, Scn5a
GO:0007613	BP	e	memory	3/179	93/32695	0.0146	n.a.	3	1	1	1	Foxo6, Grin2b, Nog
GO:0051291	BP	e	protein heterooligomerization	3/179	94/32695	0.015	n.a.	3	1	1	1	Cldn1, Ide, Kcnh7
GO:0010975	BP	e	regulation of neuron projection development	2/179	35/32695	0.0158	n.a.	2	1	1	1	Dpysl3, Tbr1
GO:0030501	BP	e	positive regulation of bone mineralization	2/179	35/32695	0.0158	n.a.	2	1	1	1	Kl, Mef2c
GO:0007208	BP	e	phospholipase C-activating serotonin receptor signaling pathway	1/179	3/32695	0.0163	n.a.	1	1	1	1	Htr2c
GO:0097477	BP	e	lateral motor column neuron migration	1/179	3/32695	0.0163	n.a.	1	1	1	1	Reln
GO:1901078	BP	e	negative regulation of relaxation of muscle	1/179	3/32695	0.0163	n.a.	1	1	1	1	Actn3
GO:1900625	BP	e	positive regulation of monocyte aggregation	1/179	3/32695	0.0163	n.a.	1	1	1	1	Nr4a3
GO:0071472	BP	e	cellular response to salt stress	1/179	3/32695	0.0163	n.a.	1	1	1	1	Aqp1
GO:0021986	BP	e	habenula development	1/179	3/32695	0.0163	n.a.	1	1	1	1	Nr4a2
GO:0003093	BP	e	regulation of glomerular filtration	1/179	3/32695	0.0163	n.a.	1	1	1	1	Ptpro
GO:0061074	BP	e	regulation of neural retina development	1/179	3/32695	0.0163	n.a.	1	1	1	1	Six3
GO:2000016	BP	e	negative regulation of determination of dorsal identity	1/179	3/32695	0.0163	n.a.	1	1	1	1	Sostdc1
GO:0060025	BP	e	regulation of synaptic activity	1/179	3/32695	0.0163	n.a.	1	1	1	1	Mef2c
GO:0035194	BP	e	posttranscriptional gene silencing by RNA	1/179	3/32695	0.0163	n.a.	1	1	1	1	Helz
GO:0048871	BP	e	multicellular organismal homeostasis	1/179	3/32695	0.0163	n.a.	1	1	1	1	Ndn
GO:0045163	BP	e	clustering of voltage-gated potassium channels	1/179	3/32695	0.0163	n.a.	1	1	1	1	Cntnap2
GO:0071288	BP	e	cellular response to mercury ion	1/179	3/32695	0.0163	n.a.	1	1	1	1	Aqp1
GO:0110024	BP	e	positive regulation of cardiac muscle myoblast proliferation	1/179	3/32695	0.0163	n.a.	1	1	1	1	Meis2
GO:0021965	BP	e	spinal cord ventral commissure morphogenesis	1/179	3/32695	0.0163	n.a.	1	1	1	1	Dcc
GO:2000111	BP	e	positive regulation of macrophage apoptotic process	1/179	3/32695	0.0163	n.a.	1	1	1	1	Mef2c
GO:0015729	BP	e	oxaloacetate transport	1/179	3/32695	0.0163	n.a.	1	1	1	1	Slc25a30
GO:0006589	BP	e	octopamine biosynthetic process	1/179	3/32695	0.0163	n.a.	1	1	1	1	Moxd1
GO:0015709	BP	e	thiosulfate transport	1/179	3/32695	0.0163	n.a.	1	1	1	1	Slc25a30
GO:0021536	BP	e	diencephalon development	1/179	3/32695	0.0163	n.a.	1	1	1	1	Six3
GO:0086067	BP	e	AV node cell to bundle of His cell communication	1/179	3/32695	0.0163	n.a.	1	1	1	1	Scn5a
GO:0086047	BP	e	membrane depolarization during Purkinje myocyte cell action potential	1/179	3/32695	0.0163	n.a.	1	1	1	1	Scn5a
GO:0086048	BP	e	membrane depolarization during bundle of His cell action potential	1/179	3/32695	0.0163	n.a.	1	1	1	1	Scn5a
GO:0097402	BP	e	neuroblast migration	1/179	3/32695	0.0163	n.a.	1	1	1	1	Six3
GO:2001257	BP	e	regulation of cation channel activity	1/179	3/32695	0.0163	n.a.	1	1	1	1	Homer1
GO:0045963	BP	e	negative regulation of dopamine metabolic process	1/179	3/32695	0.0163	n.a.	1	1	1	1	Htr2c
GO:0010992	BP	e	ubiquitin recycling	1/179	3/32695	0.0163	n.a.	1	1	1	1	Ide
GO:0014012	BP	e	peripheral nervous system axon regeneration	1/179	3/32695	0.0163	n.a.	1	1	1	1	Tnc
GO:0046960	BP	e	sensitization	1/179	3/32695	0.0163	n.a.	1	1	1	1	Grin2b
GO:0070673	BP	e	response to interleukin-18	1/179	3/32695	0.0163	n.a.	1	1	1	1	Cldn1
GO:0071422	BP	e	succinate transmembrane transport	1/179	3/32695	0.0163	n.a.	1	1	1	1	Slc25a30
GO:0071423	BP	e	malate transmembrane transport	1/179	3/32695	0.0163	n.a.	1	1	1	1	Slc25a30
GO:0014057	BP	e	positive regulation of acetylcholine secretion, neurotransmission	1/179	3/32695	0.0163	n.a.	1	1	1	1	Htr2c
GO:0033631	BP	e	cell-cell adhesion mediated by integrin	1/179	3/32695	0.0163	n.a.	1	1	1	1	L1cam
GO:0001543	BP	e	ovarian follicle rupture	1/179	3/32695	0.0163	n.a.	1	1	1	1	Nrip1
GO:0072734	BP	e	cellular response to staurosporine	1/179	3/32695	0.0163	n.a.	1	1	1	1	Casp3
GO:0031448	BP	e	positive regulation of fast-twitch skeletal muscle fiber contraction	1/179	3/32695	0.0163	n.a.	1	1	1	1	Actn3
GO:1903348	BP	e	positive regulation of bicellular tight junction assembly	1/179	3/32695	0.0163	n.a.	1	1	1	1	Cldn1
GO:0042447	BP	e	hormone catabolic process	1/179	3/32695	0.0163	n.a.	1	1	1	1	Ide
GO:0007043	BP	e	cell-cell junction assembly	2/179	36/32695	0.0166	n.a.	2	1	1	1	Cdh3, Cdh6
GO:0007528	BP	e	neuromuscular junction development	2/179	37/32695	0.0175	n.a.	2	1	1	1	Cacnb2, Tnc
GO:0010634	BP	e	positive regulation of epithelial cell migration	2/179	37/32695	0.0175	n.a.	2	1	1	1	Aqp1, Enpp2
GO:0060999	BP	e	positive regulation of dendritic spine development	2/179	37/32695	0.0175	n.a.	2	1	1	1	Foxo6, Nlgn3
GO:0001707	BP	e	mesoderm formation	2/179	37/32695	0.0175	n.a.	2	1	1	1	Nog, Nr4a3
GO:0051453	BP	e	regulation of intracellular pH	2/179	37/32695	0.0175	n.a.	2	1	1	1	Slc4a5, Slc4a8
GO:0071526	BP	e	semaphorin-plexin signaling pathway	2/179	37/32695	0.0175	n.a.	2	1	1	1	Sema3f, Sema6a
GO:0071805	BP	e	potassium ion transmembrane transport	3/179	101/32695	0.0182	n.a.	3	1	1	1	Kcne2, Kcnf1, Kcnh7
GO:0042542	BP	e	response to hydrogen peroxide	2/179	38/32695	0.0184	n.a.	2	1	1	1	Casp3, Nr4a3
GO:0050890	BP	e	cognition	2/179	39/32695	0.0193	n.a.	2	1	1	1	Chl1, Cux2
GO:0000902	BP	e	cell morphogenesis	3/179	104/32695	0.0196	n.a.	3	1	1	1	Cdh3, Cdh6, Ptpro
GO:0009968	BP	e	negative regulation of signal transduction	3/179	106/32695	0.0206	n.a.	3	1	1	1	Epha5, Epha6, Lmtk2
GO:2000331	BP	e	regulation of terminal button organization	1/179	4/32695	0.0217	n.a.	1	1	1	1	Nlgn3
GO:0086016	BP	e	AV node cell action potential	1/179	4/32695	0.0217	n.a.	1	1	1	1	Scn5a
GO:0070295	BP	e	renal water absorption	1/179	4/32695	0.0217	n.a.	1	1	1	1	Aqp1
GO:0030104	BP	e	water homeostasis	1/179	4/32695	0.0217	n.a.	1	1	1	1	Aqp1
GO:0071374	BP	e	cellular response to parathyroid hormone stimulus	1/179	4/32695	0.0217	n.a.	1	1	1	1	Mef2c
GO:2001016	BP	e	positive regulation of skeletal muscle cell differentiation	1/179	4/32695	0.0217	n.a.	1	1	1	1	Mef2c
GO:2001013	BP	e	epithelial cell proliferation involved in renal tubule morphogenesis	1/179	4/32695	0.0217	n.a.	1	1	1	1	Mef2c
GO:0033326	BP	e	cerebrospinal fluid secretion	1/179	4/32695	0.0217	n.a.	1	1	1	1	Slc4a5
GO:0015793	BP	e	glycerol transport	1/179	4/32695	0.0217	n.a.	1	1	1	1	Aqp1
GO:0034638	BP	e	phosphatidylcholine catabolic process	1/179	4/32695	0.0217	n.a.	1	1	1	1	Enpp2
GO:0003289	BP	e	atrial septum primum morphogenesis	1/179	4/32695	0.0217	n.a.	1	1	1	1	Sox4
GO:0071474	BP	e	cellular hyperosmotic response	1/179	4/32695	0.0217	n.a.	1	1	1	1	Aqp1
GO:1904447	BP	e	folate import across plasma membrane	1/179	4/32695	0.0217	n.a.	1	1	1	1	Folr1
GO:0003091	BP	e	renal water homeostasis	1/179	4/32695	0.0217	n.a.	1	1	1	1	Wfs1
GO:0040013	BP	e	negative regulation of locomotion	1/179	4/32695	0.0217	n.a.	1	1	1	1	Htr2c
GO:0097491	BP	e	sympathetic neuron projection guidance	1/179	4/32695	0.0217	n.a.	1	1	1	1	Sema3f
GO:0060297	BP	e	regulation of sarcomere organization	1/179	4/32695	0.0217	n.a.	1	1	1	1	Mef2c
GO:0060024	BP	e	rhythmic synaptic transmission	1/179	4/32695	0.0217	n.a.	1	1	1	1	Nlgn3
GO:0098989	BP	e	NMDA selective glutamate receptor signaling pathway	1/179	4/32695	0.0217	n.a.	1	1	1	1	Grin2b
GO:0060005	BP	e	vestibular reflex	1/179	4/32695	0.0217	n.a.	1	1	1	1	Nr4a3
GO:1902742	BP	e	apoptotic process involved in development	1/179	4/32695	0.0217	n.a.	1	1	1	1	Six3
GO:0036486	BP	e	ventral trunk neural crest cell migration	1/179	4/32695	0.0217	n.a.	1	1	1	1	Sema3f
GO:0070873	BP	e	regulation of glycogen metabolic process	1/179	4/32695	0.0217	n.a.	1	1	1	1	Pomc
GO:0007423	BP	e	sensory organ development	1/179	4/32695	0.0217	n.a.	1	1	1	1	Grin2b
GO:0097167	BP	e	circadian regulation of translation	1/179	4/32695	0.0217	n.a.	1	1	1	1	Per1
GO:0071322	BP	e	cellular response to carbohydrate stimulus	1/179	4/32695	0.0217	n.a.	1	1	1	1	Rps6ka2
GO:0021533	BP	e	cell differentiation in hindbrain	1/179	4/32695	0.0217	n.a.	1	1	1	1	Nog
GO:0021797	BP	e	forebrain anterior/posterior pattern specification	1/179	4/32695	0.0217	n.a.	1	1	1	1	Six3
GO:0035984	BP	e	cellular response to trichostatin A	1/179	4/32695	0.0217	n.a.	1	1	1	1	Mef2c
GO:0021800	BP	e	cerebral cortex tangential migration	1/179	4/32695	0.0217	n.a.	1	1	1	1	Reln
GO:0086046	BP	e	membrane depolarization during SA node cell action potential	1/179	4/32695	0.0217	n.a.	1	1	1	1	Scn5a
GO:0097490	BP	e	sympathetic neuron projection extension	1/179	4/32695	0.0217	n.a.	1	1	1	1	Sema3f
GO:0010513	BP	e	positive regulation of phosphatidylinositol biosynthetic process	1/179	4/32695	0.0217	n.a.	1	1	1	1	Htr2c
GO:1902285	BP	e	semaphorin-plexin signaling pathway involved in neuron projection guidance	1/179	4/32695	0.0217	n.a.	1	1	1	1	Sema3f
GO:0051365	BP	e	cellular response to potassium ion starvation	1/179	4/32695	0.0217	n.a.	1	1	1	1	Hrk
GO:0008065	BP	e	establishment of blood-nerve barrier	1/179	4/32695	0.0217	n.a.	1	1	1	1	Cldn1
GO:0098915	BP	e	membrane repolarization during ventricular cardiac muscle cell action potential	1/179	4/32695	0.0217	n.a.	1	1	1	1	Kcne2
GO:0070314	BP	e	G1 to G0 transition	1/179	4/32695	0.0217	n.a.	1	1	1	1	1500015O10Rik
GO:0001839	BP	e	neural plate morphogenesis	1/179	4/32695	0.0217	n.a.	1	1	1	1	Nog
GO:0060447	BP	e	bud outgrowth involved in lung branching	1/179	4/32695	0.0217	n.a.	1	1	1	1	Tnc
GO:0002634	BP	e	regulation of germinal center formation	1/179	4/32695	0.0217	n.a.	1	1	1	1	Mef2c
GO:1990086	BP	e	lens fiber cell apoptotic process	1/179	4/32695	0.0217	n.a.	1	1	1	1	Six3
GO:1901657	BP	e	glycosyl compound metabolic process	1/179	4/32695	0.0217	n.a.	1	1	1	1	Kl
GO:0038026	BP	e	reelin-mediated signaling pathway	1/179	4/32695	0.0217	n.a.	1	1	1	1	Reln
GO:0010454	BP	e	negative regulation of cell fate commitment	1/179	4/32695	0.0217	n.a.	1	1	1	1	Sostdc1
GO:0002232	BP	e	leukocyte chemotaxis involved in inflammatory response	1/179	4/32695	0.0217	n.a.	1	1	1	1	Lbp
GO:0035910	BP	e	ascending aorta morphogenesis	1/179	4/32695	0.0217	n.a.	1	1	1	1	Sox4
GO:1902950	BP	e	regulation of dendritic spine maintenance	1/179	4/32695	0.0217	n.a.	1	1	1	1	Homer1
GO:1902951	BP	e	negative regulation of dendritic spine maintenance	1/179	4/32695	0.0217	n.a.	1	1	1	1	Grin2b
GO:0033563	BP	e	dorsal/ventral axon guidance	1/179	4/32695	0.0217	n.a.	1	1	1	1	Dcc
GO:1901843	BP	e	positive regulation of high voltage-gated calcium channel activity	1/179	4/32695	0.0217	n.a.	1	1	1	1	Cacnb2
GO:1901842	BP	e	negative regulation of high voltage-gated calcium channel activity	1/179	4/32695	0.0217	n.a.	1	1	1	1	Rrad
GO:0098609	BP	e	cell-cell adhesion	3/179	110/32695	0.0227	n.a.	3	1	1	1	Cdh3, Kirrel2, Negr1
GO:0051482	BP	e	positive regulation of cytosolic calcium ion concentration involved in phospholipase C-activating G-protein coupled signaling pathway	2/179	43/32695	0.0232	n.a.	2	1	1	1	Gpr17, Htr2c
GO:0090090	BP	e	negative regulation of canonical Wnt signaling pathway	3/179	111/32695	0.0233	n.a.	3	1	1	1	Nog, Ptpro, Sostdc1
GO:0030336	BP	e	negative regulation of cell migration	3/179	112/32695	0.0238	n.a.	3	1	1	1	Dpysl3, Nav3, Nog
GO:0009791	BP	e	post-embryonic development	3/179	113/32695	0.0244	n.a.	3	1	1	1	Kdm5b, Ndn, Nr4a2
GO:0006644	BP	e	phospholipid metabolic process	2/179	45/32695	0.0253	n.a.	2	1	1	1	Enpp2, Plppr1
GO:0032720	BP	e	negative regulation of tumor necrosis factor production	2/179	45/32695	0.0253	n.a.	2	1	1	1	Lbp, Pomc
GO:0030890	BP	e	positive regulation of B cell proliferation	2/179	45/32695	0.0253	n.a.	2	1	1	1	Mef2c, Slc39a10
GO:0007416	BP	e	synapse assembly	2/179	45/32695	0.0253	n.a.	2	1	1	1	Adgrl3, Nlgn3
GO:0009411	BP	e	response to UV	2/179	46/32695	0.0264	n.a.	2	1	1	1	Casp3, Dtl
GO:0045892	BP	e	negative regulation of transcription, DNA-templated	7/179	529/32695	0.027	n.a.	7	1	1	1	Cux2, Kdm5b, Klf10, Per1, Rcor2, Six3, Tbl1xr1
GO:0046655	BP	e	folic acid metabolic process	1/179	5/32695	0.0271	n.a.	1	1	1	1	Folr1
GO:0098706	BP	e	ferric iron import across plasma membrane	1/179	5/32695	0.0271	n.a.	1	1	1	1	Steap2
GO:0086011	BP	e	membrane repolarization during action potential	1/179	5/32695	0.0271	n.a.	1	1	1	1	Kcne2
GO:0045919	BP	e	positive regulation of cytolysis	1/179	5/32695	0.0271	n.a.	1	1	1	1	Lbp
GO:0010694	BP	e	positive regulation of alkaline phosphatase activity	1/179	5/32695	0.0271	n.a.	1	1	1	1	Mef2c
GO:0033363	BP	e	secretory granule organization	1/179	5/32695	0.0271	n.a.	1	1	1	1	Aqp1
GO:0070327	BP	e	thyroid hormone transport	1/179	5/32695	0.0271	n.a.	1	1	1	1	Ttr
GO:0071205	BP	e	protein localization to juxtaparanode region of axon	1/179	5/32695	0.0271	n.a.	1	1	1	1	Cntnap2
GO:0008037	BP	e	cell recognition	1/179	5/32695	0.0271	n.a.	1	1	1	1	Igsf21
GO:1902474	BP	e	positive regulation of protein localization to synapse	1/179	5/32695	0.0271	n.a.	1	1	1	1	Nlgn3
GO:0072102	BP	e	glomerulus morphogenesis	1/179	5/32695	0.0271	n.a.	1	1	1	1	Mef2c
GO:0060023	BP	e	soft palate development	1/179	5/32695	0.0271	n.a.	1	1	1	1	Sox11
GO:2000467	BP	e	positive regulation of glycogen (starch) synthase activity	1/179	5/32695	0.0271	n.a.	1	1	1	1	Ppp1r3g
GO:0060513	BP	e	prostatic bud formation	1/179	5/32695	0.0271	n.a.	1	1	1	1	Nog
GO:0003253	BP	e	cardiac neural crest cell migration involved in outflow tract morphogenesis	1/179	5/32695	0.0271	n.a.	1	1	1	1	Folr1
GO:0097107	BP	e	postsynaptic density assembly	1/179	5/32695	0.0271	n.a.	1	1	1	1	Reln
GO:0048023	BP	e	positive regulation of melanin biosynthetic process	1/179	5/32695	0.0271	n.a.	1	1	1	1	Cdh3
GO:0046878	BP	e	positive regulation of saliva secretion	1/179	5/32695	0.0271	n.a.	1	1	1	1	Aqp1
GO:0050672	BP	e	negative regulation of lymphocyte proliferation	1/179	5/32695	0.0271	n.a.	1	1	1	1	Sox11
GO:0002328	BP	e	pro-B cell differentiation	1/179	5/32695	0.0271	n.a.	1	1	1	1	Sox4
GO:0007256	BP	e	activation of JNKK activity	1/179	5/32695	0.0271	n.a.	1	1	1	1	Tnik
GO:0001957	BP	e	intramembranous ossification	1/179	5/32695	0.0271	n.a.	1	1	1	1	Mn1
GO:0061333	BP	e	renal tubule morphogenesis	1/179	5/32695	0.0271	n.a.	1	1	1	1	Mef2c
GO:0021637	BP	e	trigeminal nerve structural organization	1/179	5/32695	0.0271	n.a.	1	1	1	1	Sema3f
GO:0015015	BP	e	heparan sulfate proteoglycan biosynthetic process, enzymatic modification	1/179	5/32695	0.0271	n.a.	1	1	1	1	Hs6st2
GO:0003105	BP	e	negative regulation of glomerular filtration	1/179	5/32695	0.0271	n.a.	1	1	1	1	Ptpro
GO:1904491	BP	e	protein localization to ciliary transition zone	1/179	5/32695	0.0271	n.a.	1	1	1	1	Tctn2
GO:0061743	BP	e	motor learning	1/179	5/32695	0.0271	n.a.	1	1	1	1	Gpr88
GO:0046689	BP	e	response to mercury ion	1/179	5/32695	0.0271	n.a.	1	1	1	1	Pgam2
GO:0060676	BP	e	ureteric bud formation	1/179	5/32695	0.0271	n.a.	1	1	1	1	Nog
GO:0001661	BP	e	conditioned taste aversion	1/179	5/32695	0.0271	n.a.	1	1	1	1	Tbr1
GO:1900015	BP	e	regulation of cytokine production involved in inflammatory response	1/179	5/32695	0.0271	n.a.	1	1	1	1	Per1
GO:0071704	BP	e	organic substance metabolic process	1/179	5/32695	0.0271	n.a.	1	1	1	1	Pgm2l1
GO:2000987	BP	e	positive regulation of behavioral fear response	1/179	5/32695	0.0271	n.a.	1	1	1	1	Mef2c
GO:1903817	BP	e	negative regulation of voltage-gated potassium channel activity	1/179	5/32695	0.0271	n.a.	1	1	1	1	Kcne2
GO:0042461	BP	e	photoreceptor cell development	1/179	5/32695	0.0271	n.a.	1	1	1	1	Dcx
GO:0021764	BP	e	amygdala development	1/179	5/32695	0.0271	n.a.	1	1	1	1	Tbr1
GO:0033564	BP	e	anterior/posterior axon guidance	1/179	5/32695	0.0271	n.a.	1	1	1	1	Dcc
GO:0097119	BP	e	postsynaptic density protein 95 clustering	1/179	5/32695	0.0271	n.a.	1	1	1	1	Reln
GO:1901841	BP	e	regulation of high voltage-gated calcium channel activity	1/179	5/32695	0.0271	n.a.	1	1	1	1	Rrad
GO:0007162	BP	e	negative regulation of cell adhesion	2/179	47/32695	0.0274	n.a.	2	1	1	1	Epha5, Tnc
GO:0001666	BP	e	response to hypoxia	3/179	119/32695	0.0278	n.a.	3	1	1	1	Grin2b, Nr4a2, Sox4
GO:0060048	BP	e	cardiac muscle contraction	2/179	48/32695	0.0285	n.a.	2	1	1	1	Myh7, Scn5a
GO:0050808	BP	e	synapse organization	2/179	48/32695	0.0285	n.a.	2	1	1	1	L1cam, Nlgn3
GO:0007166	BP	e	cell surface receptor signaling pathway	4/179	212/32695	0.0296	n.a.	4	1	1	1	Adgrl3, L1cam, Prokr2, Sema6a
GO:0001755	BP	e	neural crest cell migration	2/179	49/32695	0.0296	n.a.	2	1	1	1	Sema3f, Sema6a
GO:0051017	BP	e	actin filament bundle assembly	2/179	49/32695	0.0296	n.a.	2	1	1	1	Dpysl3, Marcks
GO:0048167	BP	e	regulation of synaptic plasticity	2/179	49/32695	0.0296	n.a.	2	1	1	1	Grin2b, Mef2c
GO:0006936	BP	e	muscle contraction	2/179	50/32695	0.0308	n.a.	2	1	1	1	Actn3, Myh7
GO:0035176	BP	e	social behavior	2/179	50/32695	0.0308	n.a.	2	1	1	1	Cntnap2, Nlgn3
GO:0035690	BP	e	cellular response to drug	2/179	50/32695	0.0308	n.a.	2	1	1	1	Kcne2, Mef2c
GO:0042391	BP	e	regulation of membrane potential	3/179	124/32695	0.0309	n.a.	3	1	1	1	Glra2, Grik3, Kcnh7
GO:0045652	BP	e	regulation of megakaryocyte differentiation	1/179	6/32695	0.0324	n.a.	1	1	1	1	Mef2c
GO:0021785	BP	e	branchiomotor neuron axon guidance	1/179	6/32695	0.0324	n.a.	1	1	1	1	Sema3f
GO:0086012	BP	e	membrane depolarization during cardiac muscle cell action potential	1/179	6/32695	0.0324	n.a.	1	1	1	1	Scn5a
GO:0086015	BP	e	SA node cell action potential	1/179	6/32695	0.0324	n.a.	1	1	1	1	Scn5a
GO:1902259	BP	e	regulation of delayed rectifier potassium channel activity	1/179	6/32695	0.0324	n.a.	1	1	1	1	Kcne2
GO:1905563	BP	e	negative regulation of vascular endothelial cell proliferation	1/179	6/32695	0.0324	n.a.	1	1	1	1	Mef2c
GO:2000394	BP	e	positive regulation of lamellipodium morphogenesis	1/179	6/32695	0.0324	n.a.	1	1	1	1	Enpp2
GO:0070447	BP	e	positive regulation of oligodendrocyte progenitor proliferation	1/179	6/32695	0.0324	n.a.	1	1	1	1	Nog
GO:0071476	BP	e	cellular hypotonic response	1/179	6/32695	0.0324	n.a.	1	1	1	1	Prkg2
GO:1903208	BP	e	negative regulation of hydrogen peroxide-induced neuron death	1/179	6/32695	0.0324	n.a.	1	1	1	1	Nr4a3
GO:1900747	BP	e	negative regulation of vascular endothelial growth factor signaling pathway	1/179	6/32695	0.0324	n.a.	1	1	1	1	Sema6a
GO:0060022	BP	e	hard palate development	1/179	6/32695	0.0324	n.a.	1	1	1	1	Sox11
GO:1901621	BP	e	negative regulation of smoothened signaling pathway involved in dorsal/ventral neural tube patterning	1/179	6/32695	0.0324	n.a.	1	1	1	1	Gpr161
GO:0061038	BP	e	uterus morphogenesis	1/179	6/32695	0.0324	n.a.	1	1	1	1	Kdm5b
GO:0010659	BP	e	cardiac muscle cell apoptotic process	1/179	6/32695	0.0324	n.a.	1	1	1	1	Rps6ka2
GO:0051823	BP	e	regulation of synapse structural plasticity	1/179	6/32695	0.0324	n.a.	1	1	1	1	Ncan
GO:1901142	BP	e	insulin metabolic process	1/179	6/32695	0.0324	n.a.	1	1	1	1	Ide
GO:0097104	BP	e	postsynaptic membrane assembly	1/179	6/32695	0.0324	n.a.	1	1	1	1	Nlgn3
GO:0055012	BP	e	ventricular cardiac muscle cell differentiation	1/179	6/32695	0.0324	n.a.	1	1	1	1	Mef2c
GO:2000323	BP	e	negative regulation of glucocorticoid receptor signaling pathway	1/179	6/32695	0.0324	n.a.	1	1	1	1	Per1
GO:0007210	BP	e	serotonin receptor signaling pathway	1/179	6/32695	0.0324	n.a.	1	1	1	1	Htr2c
GO:0015884	BP	e	folic acid transport	1/179	6/32695	0.0324	n.a.	1	1	1	1	Folr1
GO:0034720	BP	e	histone H3-K4 demethylation	1/179	6/32695	0.0324	n.a.	1	1	1	1	Kdm5b
GO:0061469	BP	e	regulation of type B pancreatic cell proliferation	1/179	6/32695	0.0324	n.a.	1	1	1	1	Nr4a3
GO:0003231	BP	e	cardiac ventricle development	1/179	6/32695	0.0324	n.a.	1	1	1	1	Scn5a
GO:1903715	BP	e	regulation of aerobic respiration	1/179	6/32695	0.0324	n.a.	1	1	1	1	Actn3
GO:2000675	BP	e	negative regulation of type B pancreatic cell apoptotic process	1/179	6/32695	0.0324	n.a.	1	1	1	1	Wfs1
GO:0048318	BP	e	axial mesoderm development	1/179	6/32695	0.0324	n.a.	1	1	1	1	Nog
GO:1904753	BP	e	negative regulation of vascular associated smooth muscle cell migration	1/179	6/32695	0.0324	n.a.	1	1	1	1	Mef2c
GO:0061312	BP	e	BMP signaling pathway involved in heart development	1/179	6/32695	0.0324	n.a.	1	1	1	1	Nog
GO:0060372	BP	e	regulation of atrial cardiac muscle cell membrane repolarization	1/179	6/32695	0.0324	n.a.	1	1	1	1	Scn5a
GO:0014033	BP	e	neural crest cell differentiation	1/179	6/32695	0.0324	n.a.	1	1	1	1	Mef2c
GO:0071870	BP	e	cellular response to catecholamine stimulus	1/179	6/32695	0.0324	n.a.	1	1	1	1	Nr4a3
GO:0010815	BP	e	bradykinin catabolic process	1/179	6/32695	0.0324	n.a.	1	1	1	1	Ide
GO:0048633	BP	e	positive regulation of skeletal muscle tissue growth	1/179	6/32695	0.0324	n.a.	1	1	1	1	Actn3
GO:0072112	BP	e	glomerular visceral epithelial cell differentiation	1/179	6/32695	0.0324	n.a.	1	1	1	1	Ptpro
GO:0090080	BP	e	positive regulation of MAPKKK cascade by fibroblast growth factor receptor signaling pathway	1/179	6/32695	0.0324	n.a.	1	1	1	1	Kl
GO:0060012	BP	e	synaptic transmission, glycinergic	1/179	6/32695	0.0324	n.a.	1	1	1	1	Glra2
GO:0097114	BP	e	NMDA glutamate receptor clustering	1/179	6/32695	0.0324	n.a.	1	1	1	1	Reln
GO:0048570	BP	e	notochord morphogenesis	1/179	6/32695	0.0324	n.a.	1	1	1	1	Nog
GO:0042420	BP	e	dopamine catabolic process	1/179	6/32695	0.0324	n.a.	1	1	1	1	Moxd1
GO:0006508	BP	e	proteolysis	7/179	553/32695	0.0332	n.a.	7	1	1	1	Casp3, Ide, Lnpep, Pgpep1, Prss12, Reln, Usp43
GO:0007601	BP	e	visual perception	3/179	129/32695	0.0342	n.a.	3	1	1	1	Cacnb2, Olfm2, Wfs1
GO:0006915	BP	e	apoptotic process	7/179	559/32695	0.0349	n.a.	7	1	1	1	Casp3, Dcc, Hrk, Mef2c, Sema6a, Tox3, Zmat3
GO:0043065	BP	e	positive regulation of apoptotic process	5/179	329/32695	0.0353	n.a.	5	1	1	1	Casp3, Hrk, Rps6ka2, Sox4, Zmat3
GO:0008286	BP	e	insulin receptor signaling pathway	2/179	54/32695	0.0354	n.a.	2	1	1	1	Foxo6, Kl
GO:0006468	BP	e	protein phosphorylation	7/179	565/32695	0.0366	n.a.	7	1	1	1	Cdkl4, Epha5, Epha6, Lmtk2, Prkg2, Rps6ka2, Tnik
GO:0050877	BP	e	nervous system process	2/179	55/32695	0.0366	n.a.	2	1	1	1	Glra2, Wfs1
GO:0072659	BP	e	protein localization to plasma membrane	3/179	133/32695	0.0369	n.a.	3	1	1	1	Cacnb2, Prkg2, Tnik
GO:0086014	BP	e	atrial cardiac muscle cell action potential	1/179	7/32695	0.0377	n.a.	1	1	1	1	Scn5a
GO:0042634	BP	e	regulation of hair cycle	1/179	7/32695	0.0377	n.a.	1	1	1	1	Per1
GO:0030049	BP	e	muscle filament sliding	1/179	7/32695	0.0377	n.a.	1	1	1	1	Myh7
GO:0097553	BP	e	calcium ion transmembrane import into cytosol	1/179	7/32695	0.0377	n.a.	1	1	1	1	Grin2b
GO:0002035	BP	e	brain renin-angiotensin system	1/179	7/32695	0.0377	n.a.	1	1	1	1	Rps6ka2
GO:0014047	BP	e	glutamate secretion	1/179	7/32695	0.0377	n.a.	1	1	1	1	Grm2
GO:0045743	BP	e	positive regulation of fibroblast growth factor receptor signaling pathway	1/179	7/32695	0.0377	n.a.	1	1	1	1	Fgfbp3
GO:0071578	BP	e	zinc ion import across plasma membrane	1/179	7/32695	0.0377	n.a.	1	1	1	1	Slc39a10
GO:0045835	BP	e	negative regulation of meiotic nuclear division	1/179	7/32695	0.0377	n.a.	1	1	1	1	Rps6ka2
GO:0060763	BP	e	mammary duct terminal end bud growth	1/179	7/32695	0.0377	n.a.	1	1	1	1	Kdm5b
GO:0090559	BP	e	regulation of membrane permeability	1/179	7/32695	0.0377	n.a.	1	1	1	1	Lbp
GO:0060235	BP	e	lens induction in camera-type eye	1/179	7/32695	0.0377	n.a.	1	1	1	1	Six3
GO:0002467	BP	e	germinal center formation	1/179	7/32695	0.0377	n.a.	1	1	1	1	Mef2c
GO:0060536	BP	e	cartilage morphogenesis	1/179	7/32695	0.0377	n.a.	1	1	1	1	Mef2c
GO:1901166	BP	e	neural crest cell migration involved in autonomic nervous system development	1/179	7/32695	0.0377	n.a.	1	1	1	1	Sema3f
GO:0007215	BP	e	glutamate receptor signaling pathway	1/179	7/32695	0.0377	n.a.	1	1	1	1	Grik3
GO:0021798	BP	e	forebrain dorsal/ventral pattern formation	1/179	7/32695	0.0377	n.a.	1	1	1	1	Six3
GO:0050861	BP	e	positive regulation of B cell receptor signaling pathway	1/179	7/32695	0.0377	n.a.	1	1	1	1	Slc39a10
GO:0090279	BP	e	regulation of calcium ion import	1/179	7/32695	0.0377	n.a.	1	1	1	1	Homer1
GO:0060373	BP	e	regulation of ventricular cardiac muscle cell membrane depolarization	1/179	7/32695	0.0377	n.a.	1	1	1	1	Scn5a
GO:0051963	BP	e	regulation of synapse assembly	1/179	7/32695	0.0377	n.a.	1	1	1	1	Mef2c
GO:1902305	BP	e	regulation of sodium ion transmembrane transport	1/179	7/32695	0.0377	n.a.	1	1	1	1	Scn5a
GO:0022405	BP	e	hair cycle process	1/179	7/32695	0.0377	n.a.	1	1	1	1	Cdh3
GO:0060613	BP	e	fat pad development	1/179	7/32695	0.0377	n.a.	1	1	1	1	Tbl1xr1
GO:0014054	BP	e	positive regulation of gamma-aminobutyric acid secretion	1/179	7/32695	0.0377	n.a.	1	1	1	1	Htr2c
GO:0042769	BP	e	DNA damage response, detection of DNA damage	1/179	7/32695	0.0377	n.a.	1	1	1	1	Sox4
GO:0042297	BP	e	vocal learning	1/179	7/32695	0.0377	n.a.	1	1	1	1	Cntnap2
GO:0090324	BP	e	negative regulation of oxidative phosphorylation	1/179	7/32695	0.0377	n.a.	1	1	1	1	Actn3
GO:0006999	BP	e	nuclear pore organization	1/179	7/32695	0.0377	n.a.	1	1	1	1	Pom121
GO:0045794	BP	e	negative regulation of cell volume	1/179	7/32695	0.0377	n.a.	1	1	1	1	Prkg2
GO:0048752	BP	e	semicircular canal morphogenesis	1/179	7/32695	0.0377	n.a.	1	1	1	1	Nr4a3
GO:0015677	BP	e	copper ion import	1/179	7/32695	0.0377	n.a.	1	1	1	1	Steap2
GO:0015696	BP	e	ammonium transport	1/179	7/32695	0.0377	n.a.	1	1	1	1	Aqp1
GO:0030422	BP	e	production of siRNA involved in RNA interference	1/179	7/32695	0.0377	n.a.	1	1	1	1	Henmt1
GO:0001947	BP	e	heart looping	2/179	57/32695	0.0391	n.a.	2	1	1	1	Folr1, Mef2c
GO:0030178	BP	e	negative regulation of Wnt signaling pathway	2/179	57/32695	0.0391	n.a.	2	1	1	1	Six3, Sostdc1
GO:0006816	BP	e	calcium ion transport	3/179	140/32695	0.0419	n.a.	3	1	1	1	Cacna2d3, Cacnb2, Grin2b
GO:0043410	BP	e	positive regulation of MAPK cascade	3/179	141/32695	0.0426	n.a.	3	1	1	1	Epha5, Epha6, Sstr4
GO:0050885	BP	e	neuromuscular process controlling balance	2/179	60/32695	0.0429	n.a.	2	1	1	1	Gpr88, Nr4a3
GO:0055009	BP	e	atrial cardiac muscle tissue morphogenesis	1/179	8/32695	0.043	n.a.	1	1	1	1	Nog
GO:0097151	BP	e	positive regulation of inhibitory postsynaptic potential	1/179	8/32695	0.043	n.a.	1	1	1	1	Nlgn3
GO:0048512	BP	e	circadian behavior	1/179	8/32695	0.043	n.a.	1	1	1	1	Six3
GO:0061303	BP	e	cornea development in camera-type eye	1/179	8/32695	0.043	n.a.	1	1	1	1	Sox11
GO:0044320	BP	e	cellular response to leptin stimulus	1/179	8/32695	0.043	n.a.	1	1	1	1	Nr4a3
GO:0002070	BP	e	epithelial cell maturation	1/179	8/32695	0.043	n.a.	1	1	1	1	Six3
GO:0060290	BP	e	transdifferentiation	1/179	8/32695	0.043	n.a.	1	1	1	1	Mef2c
GO:1900744	BP	e	regulation of p38MAPK cascade	1/179	8/32695	0.043	n.a.	1	1	1	1	Per1
GO:0030728	BP	e	ovulation	1/179	8/32695	0.043	n.a.	1	1	1	1	Nrip1
GO:2000480	BP	e	negative regulation of cAMP-dependent protein kinase activity	1/179	8/32695	0.043	n.a.	1	1	1	1	Prkar2b
GO:0061037	BP	e	negative regulation of cartilage development	1/179	8/32695	0.043	n.a.	1	1	1	1	Nog
GO:1901642	BP	e	nucleoside transmembrane transport	1/179	8/32695	0.043	n.a.	1	1	1	1	Slc29a4
GO:0060998	BP	e	regulation of dendritic spine development	1/179	8/32695	0.043	n.a.	1	1	1	1	Mef2c
GO:0046321	BP	e	positive regulation of fatty acid oxidation	1/179	8/32695	0.043	n.a.	1	1	1	1	Nr4a3
GO:0048743	BP	e	positive regulation of skeletal muscle fiber development	1/179	8/32695	0.043	n.a.	1	1	1	1	Actn3
GO:0071514	BP	e	genetic imprinting	1/179	8/32695	0.043	n.a.	1	1	1	1	Ndn
GO:2000809	BP	e	positive regulation of synaptic vesicle clustering	1/179	8/32695	0.043	n.a.	1	1	1	1	Nlgn3
GO:0003183	BP	e	mitral valve morphogenesis	1/179	8/32695	0.043	n.a.	1	1	1	1	Sox4
GO:0042596	BP	e	fear response	1/179	8/32695	0.043	n.a.	1	1	1	1	Grin2b
GO:0051057	BP	e	positive regulation of small GTPase mediated signal transduction	1/179	8/32695	0.043	n.a.	1	1	1	1	Reln
GO:0003223	BP	e	ventricular compact myocardium morphogenesis	1/179	8/32695	0.043	n.a.	1	1	1	1	Nog
GO:0048311	BP	e	mitochondrion distribution	1/179	8/32695	0.043	n.a.	1	1	1	1	Slc4a5
GO:0051152	BP	e	positive regulation of smooth muscle cell differentiation	1/179	8/32695	0.043	n.a.	1	1	1	1	Olfm2
GO:0060371	BP	e	regulation of atrial cardiac muscle cell membrane depolarization	1/179	8/32695	0.043	n.a.	1	1	1	1	Scn5a
GO:0015844	BP	e	monoamine transport	1/179	8/32695	0.043	n.a.	1	1	1	1	Slc29a4
GO:0019725	BP	e	cellular homeostasis	1/179	8/32695	0.043	n.a.	1	1	1	1	Aqp1
GO:0048846	BP	e	axon extension involved in axon guidance	1/179	8/32695	0.043	n.a.	1	1	1	1	Sema3f
GO:0043576	BP	e	regulation of respiratory gaseous exchange	1/179	8/32695	0.043	n.a.	1	1	1	1	Nr4a2
GO:0031987	BP	e	locomotion involved in locomotory behavior	1/179	8/32695	0.043	n.a.	1	1	1	1	Adgrl3
GO:0061002	BP	e	negative regulation of dendritic spine morphogenesis	1/179	8/32695	0.043	n.a.	1	1	1	1	Nlgn3
GO:0015670	BP	e	carbon dioxide transport	1/179	8/32695	0.043	n.a.	1	1	1	1	Aqp1
GO:0006144	BP	e	purine nucleobase metabolic process	1/179	8/32695	0.043	n.a.	1	1	1	1	Ttr
GO:0048016	BP	e	inositol phosphate-mediated signaling	1/179	8/32695	0.043	n.a.	1	1	1	1	Htr2c
GO:0036289	BP	e	peptidyl-serine autophosphorylation	1/179	8/32695	0.043	n.a.	1	1	1	1	Prkg2
GO:0021978	BP	e	telencephalon regionalization	1/179	8/32695	0.043	n.a.	1	1	1	1	Six3
GO:0009653	BP	e	anatomical structure morphogenesis	2/179	61/32695	0.0442	n.a.	2	1	1	1	Sox11, Sox4
GO:0043408	BP	e	regulation of MAPK cascade	2/179	64/32695	0.0482	n.a.	2	1	1	1	Bmp3, Grin2b
GO:0071372	BP	e	cellular response to follicle-stimulating hormone stimulus	1/179	9/32695	0.0482	n.a.	1	1	1	1	Epha5
GO:0035095	BP	e	behavioral response to nicotine	1/179	9/32695	0.0482	n.a.	1	1	1	1	Htr2c
GO:0090207	BP	e	regulation of triglyceride metabolic process	1/179	9/32695	0.0482	n.a.	1	1	1	1	Tbl1xr1
GO:2001056	BP	e	positive regulation of cysteine-type endopeptidase activity	1/179	9/32695	0.0482	n.a.	1	1	1	1	Grin2b
GO:0095500	BP	e	acetylcholine receptor signaling pathway	1/179	9/32695	0.0482	n.a.	1	1	1	1	Lypd1
GO:0042053	BP	e	regulation of dopamine metabolic process	1/179	9/32695	0.0482	n.a.	1	1	1	1	Nr4a2
GO:0003139	BP	e	secondary heart field specification	1/179	9/32695	0.0482	n.a.	1	1	1	1	Mef2c
GO:0035562	BP	e	negative regulation of chromatin binding	1/179	9/32695	0.0482	n.a.	1	1	1	1	Btaf1
GO:0030510	BP	e	regulation of BMP signaling pathway	1/179	9/32695	0.0482	n.a.	1	1	1	1	Nog
GO:0002862	BP	e	negative regulation of inflammatory response to antigenic stimulus	1/179	9/32695	0.0482	n.a.	1	1	1	1	Gpr17
GO:0007158	BP	e	neuron cell-cell adhesion	1/179	9/32695	0.0482	n.a.	1	1	1	1	Nlgn3
GO:0003094	BP	e	glomerular filtration	1/179	9/32695	0.0482	n.a.	1	1	1	1	Aqp1
GO:0033601	BP	e	positive regulation of mammary gland epithelial cell proliferation	1/179	9/32695	0.0482	n.a.	1	1	1	1	Kdm5b
GO:0090394	BP	e	negative regulation of excitatory postsynaptic potential	1/179	9/32695	0.0482	n.a.	1	1	1	1	Nlgn3
GO:0061549	BP	e	sympathetic ganglion development	1/179	9/32695	0.0482	n.a.	1	1	1	1	Sema3f
GO:0001881	BP	e	receptor recycling	1/179	9/32695	0.0482	n.a.	1	1	1	1	Lmtk2
GO:0048762	BP	e	mesenchymal cell differentiation	1/179	9/32695	0.0482	n.a.	1	1	1	1	Nog
GO:0097105	BP	e	presynaptic membrane assembly	1/179	9/32695	0.0482	n.a.	1	1	1	1	Nlgn3
GO:0019985	BP	e	translesion synthesis	1/179	9/32695	0.0482	n.a.	1	1	1	1	Dtl
GO:0050795	BP	e	regulation of behavior	1/179	9/32695	0.0482	n.a.	1	1	1	1	Reln
GO:1902260	BP	e	negative regulation of delayed rectifier potassium channel activity	1/179	9/32695	0.0482	n.a.	1	1	1	1	Kcne2
GO:0021517	BP	e	ventral spinal cord development	1/179	9/32695	0.0482	n.a.	1	1	1	1	Reln
GO:0086009	BP	e	membrane repolarization	1/179	9/32695	0.0482	n.a.	1	1	1	1	Kcne2
GO:0021796	BP	e	cerebral cortex regionalization	1/179	9/32695	0.0482	n.a.	1	1	1	1	Dmrta2
GO:0045927	BP	e	positive regulation of growth	1/179	9/32695	0.0482	n.a.	1	1	1	1	Wfs1
GO:0003149	BP	e	membranous septum morphogenesis	1/179	9/32695	0.0482	n.a.	1	1	1	1	Nog
GO:0034109	BP	e	homotypic cell-cell adhesion	1/179	9/32695	0.0482	n.a.	1	1	1	1	L1cam
GO:0021860	BP	e	pyramidal neuron development	1/179	9/32695	0.0482	n.a.	1	1	1	1	Dcx
GO:0032835	BP	e	glomerulus development	1/179	9/32695	0.0482	n.a.	1	1	1	1	Ptpro
GO:0072425	BP	e	signal transduction involved in G2 DNA damage checkpoint	1/179	9/32695	0.0482	n.a.	1	1	1	1	Dtl
GO:2000253	BP	e	positive regulation of feeding behavior	1/179	9/32695	0.0482	n.a.	1	1	1	1	Nr4a3
GO:1901385	BP	e	regulation of voltage-gated calcium channel activity	1/179	9/32695	0.0482	n.a.	1	1	1	1	Cacnb2
GO:0061384	BP	e	heart trabecula morphogenesis	1/179	9/32695	0.0482	n.a.	1	1	1	1	Nog
GO:0016310	BP	e	phosphorylation	7/179	602/32695	0.0486	n.a.	7	1	1	1	Cdkl4, Epha5, Epha6, Lmtk2, Prkg2, Rps6ka2, Tnik
GO:0007507	BP	e	heart development	4/179	250/32695	0.0491	n.a.	4	1	1	1	Casp3, Mef2c, Rps6ka2, Sox4
GO:0007608	BP	p	sensory perception of smell	0/179	1114/32695	0.00325	n.a.	0	1	1	1

## Sheet: GO of RALL-ameliorate ODEGs
# Generated by GOATOOLS v0.8.4 (2019-06-09)
# min_ratio=None pval=0.05
GO	NS	enrichment	name	ratio_in_study	ratio_in_pop	p_uncorrected	depth	study_count	p_bonferroni	p_sidak	p_holm	study_items
GO:0002224	BP	e	toll-like receptor signaling pathway	7/598	21/32695	6.15e-08	n.a.	7	0.000731	0.000712	0.000731	Cd86, Irak3, Tlr13, Tlr2, Tlr4, Tlr7, Unc93b1
GO:0006955	BP	e	immune response	27/598	256/32695	3.09e-07	n.a.	27	0.00367	0.00358	0.00367	Ccl28, Ccl3, Ccl6, Ccr5, Cd86, Colec12, Cx3cr1, Cxcl10, Cxcl12, Cxcl13, Cxcl5, Fyb, H2-M3, Hfe, Il18, Il1a, Irf8, Mr1, Oas2, Oasl2, Pf4, Serpinb9, Tlr7, Tnfrsf1b, Tnfsf10, Vav1, Vtn
GO:0030335	BP	e	positive regulation of cell migration	18/598	208/32695	3.34e-07	n.a.	18	0.00396	0.00386	0.00396	Aif1, C3ar1, Cd151, Csf1, Csf1r, Ctsh, Cxcl10, Cxcl12, Edn1, Fermt3, Gpnmb, Kdr, Myo1f, Myoc, Plau, Sphk1, Synpo2, Vegfa
GO:2000406	BP	e	positive regulation of T cell migration	6/598	17/32695	3.81e-07	n.a.	6	0.00452	0.00441	0.00452	Aif1, Cxcl10, Cxcl12, Dock8, Lgals9, Pycard
GO:0006909	BP	e	phagocytosis	10/598	52/32695	3.94e-07	n.a.	10	0.00468	0.00456	0.00468	Anxa1, Anxa3, Cd302, Hck, Irf8, Itgb2, Ncf2, Pld4, Slc11a1, Vav1
GO:0032496	BP	e	response to lipopolysaccharide	12/598	103/32695	4.23e-07	n.a.	12	0.00502	0.0049	0.00502	Cxcl5, Eif2ak2, Irak3, Lgals9, Litaf, Ncf2, Nos3, Plcg2, Ptgfr, Ptgs2, Slc11a1, Tlr4
GO:0007166	BP	e	cell surface receptor signaling pathway	17/598	212/32695	4.37e-07	n.a.	17	0.00519	0.00506	0.00519	Adgrg6, Anxa1, Cd151, Cd22, Cd37, Cd44, Cd86, Cd9, Cxcl13, Edn1, Edn3, Fcer1g, Lag3, Osmr, Tnfrsf1a, Tnfrsf1b, Upk1b
GO:0045766	BP	e	positive regulation of angiogenesis	21/598	145/32695	4.89e-07	n.a.	21	0.00581	0.00566	0.0058	Acvrl1, Anxa3, C3ar1, C5ar1, Ctsh, Cx3cr1, Cybb, Eng, Hk2, Il1a, Itgb2, Kdr, Nfe2l2, Nos3, Runx1, Sphk1, Stat3, Tgfbr2, Tnfrsf1a, Vegfa, Zc3h12a
GO:0051607	BP	e	defense response to virus	29/598	167/32695	4.91e-07	n.a.	29	0.00583	0.00568	0.00583	Apobec1, Cd86, Cxcl10, Dhx58, Eif2ak2, Ifih1, Ifit1, Ifit2, Ifit3, Ifit3b, Il10rb, Il33, Irf7, Isg15, Isg20, Itgax, Mx1, Mx2, Oas2, Oasl2, Ptprc, Pycard, Rsad2, Slfn8, Tlr7, Tmem173, Trim34a, Unc93b1, Zc3hav1
GO:0001525	BP	e	angiogenesis	20/598	239/32695	5.09e-07	n.a.	20	0.00604	0.00589	0.00603	Acvrl1, Ang, Anxa2, Apln, Apold1, Casp8, Cav1, Clic4, Eng, Foxc1, Il18, Kdr, Nos3, Plau, Ptgs2, Rnf213, Tal1, Tbx1, Vegfa, Zc3h12a
GO:0045087	BP	e	innate immune response	47/598	346/32695	5.31e-07	n.a.	47	0.00631	0.00615	0.0063	Aim2, Anxa1, C1qa, C1qb, C1qc, C2, Cd14, Cd180, Cd84, Cfh, Csf1, Csf1r, Cyba, Cybb, Defb1, Dhx58, Eif2ak2, Fcer1g, Fes, Hck, Ifih1, Ifit1, Ifit2, Ifit3, Irf7, Isg20, Lcn2, Ly86, Ly9, Mr1, Mx1, Mx2, Oas2, Oasl2, Pglyrp1, Pycard, Rsad2, Smpdl3b, Ssc5d, Tlr13, Tlr2, Tlr4, Tlr7, Tmem173, Trem2, Unc93b1, Zc3hav1
GO:0009615	BP	e	response to virus	14/598	54/32695	5.51e-07	n.a.	14	0.00655	0.00638	0.00654	Dhx58, Eif2ak2, Ifih1, Ifit1, Ifit2, Irak3, Isg20, Lcn2, Mx1, Oas2, Oasl2, Rsad2, Tlr13, Zc3hav1
GO:0071346	BP	e	cellular response to interferon-gamma	13/598	87/32695	5.58e-07	n.a.	13	0.00662	0.00645	0.00661	Capg, Ccl3, Ccl6, Cdc42ep2, Flnb, Irf8, Mrc1, Rab7b, Stxbp2, Stxbp3, Tlr2, Tlr4, Vim
GO:0032481	BP	e	positive regulation of type I interferon production	6/598	18/32695	5.62e-07	n.a.	6	0.00667	0.00651	0.00667	Cd14, Dhx58, Irf7, Plcg2, Tmem173, Zc3hav1
GO:0008360	BP	e	regulation of cell shape	21/598	147/32695	5.78e-07	n.a.	21	0.00687	0.00669	0.00686	Anxa1, Arap3, Arhgap18, Ccl3, Cdc42ep1, Cdc42ep2, Cdc42ep5, Csf1r, Ermn, Fblim1, Fes, Hck, Hexb, Kdr, Msn, Myl12a, Plxnb3, Rhoj, S100b, Vegfa, Wipf1
GO:0016525	BP	e	negative regulation of angiogenesis	12/598	88/32695	6.27e-07	n.a.	12	0.00744	0.00725	0.00743	Adamts1, Cx3cr1, Cxcl10, Dcn, Foxc1, Gpr4, Hhex, Klf4, Pf4, Serpinf1, Stab1, Thbs2
GO:0032755	BP	e	positive regulation of interleukin-6 production	10/598	55/32695	6.49e-07	n.a.	10	0.0077	0.00751	0.00769	Ccr5, Cyba, Fcer1g, Il1a, Il33, Pycard, Rab7b, Tlr2, Tlr4, Tlr7
GO:0030593	BP	e	neutrophil chemotaxis	15/598	71/32695	6.59e-07	n.a.	15	0.00783	0.00763	0.00782	C5ar1, Ccl3, Ccl6, Csf3r, Cxcl10, Cxcl13, Cxcl5, Edn3, Fcer1g, Itgam, Itgb2, Nckap1l, Pf4, Spp1, Vav1
GO:0008285	BP	e	negative regulation of cell proliferation	23/598	379/32695	6.63e-07	n.a.	23	0.00788	0.00768	0.00786	Acvrl1, Aldh1a2, Bdkrb2, Btg2, Cav1, Cd37, Cd9, Csf1r, Eif2ak2, Fam129b, Il1a, Inpp5d, Klf4, Nos3, Pmp22, Ptges, Ptgs2, Runx1, Skap2, Stat3, Tgfbr2, Tlr2, Tns2
GO:0008284	BP	e	positive regulation of cell proliferation	28/598	535/32695	8.33e-07	n.a.	28	0.00989	0.00964	0.00988	Aldh1a2, Apln, Atf3, Crlf2, Csf1, Csf1r, Ctsh, Cxcl10, Cxcl12, Edn1, Edn3, Efemp1, Gab2, Hck, Hcls1, Hlx, Kdr, Mlxipl, Osmr, Plau, Prl, Ptgfr, Ptgs2, S100b, Sphk1, Stat3, Tbx1, Vegfa
GO:0030198	BP	e	extracellular matrix organization	16/598	131/32695	9.13e-07	n.a.	16	0.0108	0.0106	0.0108	Adamtsl4, Col11a2, Col27a1, Col5a2, Col9a2, Dmp1, Fbln1, Gfap, Kazald1, Mpzl3, Reck, Scara3, Smoc1, Tnfrsf11b, Vtn, Vwa1
GO:0006954	BP	e	inflammatory response	39/598	303/32695	9.74e-07	n.a.	39	0.0116	0.0113	0.0115	Aim2, Anxa1, C3ar1, C5ar1, Ccl3, Ccl6, Ccr5, Cd14, Cd44, Crlf2, Csf1, Csf1r, Cxcl10, Cxcl13, Cxcl5, Cyba, Cybb, Hck, Il18, Il1a, Ly86, Nfe2l2, Pf4, Ptgfr, Ptgs2, Pycard, Slc11a1, Smpdl3b, Sphk1, Stab1, Stat3, Themis2, Tlr13, Tlr2, Tlr4, Tlr7, Tnfrsf1a, Tnfrsf1b, Zc3h12a
GO:0045944	BP	e	positive regulation of transcription by RNA polymerase II	47/598	1116/32695	9.95e-07	n.a.	47	0.0118	0.0115	0.0118	Acvrl1, Atf3, Ccl3, Cdk5rap3, Dcn, Edn1, Eng, Foxc1, Foxd1, Hcls1, Helz2, Hexb, Hhex, Il18, Il1a, Il33, Irf7, Irf8, Jag1, Klf2, Klf4, Litaf, Lpin3, Lum, Maff, Mlxipl, Nfe2l2, Nkx2-9, Nr1h3, Osr1, Pf4, Pou2f2, Rreb1, Runx1, Slc11a1, Sox13, Spi1, Stat3, Tal1, Tbx1, Tlr2, Tlr4, Tmem173, Tnfrsf1a, Vegfa, Zc3h12a, Zic1
GO:0009617	BP	e	response to bacterium	21/598	177/32695	1.03e-06	n.a.	21	0.0123	0.0119	0.0122	Cav1, Cd14, Cxcl10, Cyp2e1, Defb1, Dhx58, Ifi44, Ifit1, Ifit3, Irf8, Isg15, Lcn2, Oas2, Pmp22, Pycard, Serpina3n, Serpinb9, Slc11a1, Tlr2, Tlr4, Usp18
GO:0032760	BP	e	positive regulation of tumor necrosis factor production	12/598	58/32695	1.03e-06	n.a.	12	0.0123	0.012	0.0123	Ccl3, Ccr5, Cd14, Cyba, Fcer1g, Il18, Lgals9, Pf4, Pycard, Tlr2, Tlr4, Tnfrsf1a
GO:0006935	BP	e	chemotaxis	17/598	133/32695	1.09e-06	n.a.	17	0.0129	0.0126	0.0129	C3ar1, C5ar1, Ccl28, Ccl3, Ccl6, Ccr5, Cx3cr1, Cxcl10, Cxcl12, Cxcl13, Cxcl5, Fes, Lgals9, Lsp1, Nckap1l, Pf4, Robo3
GO:0002376	BP	e	immune system process	47/598	420/32695	1.11e-06	n.a.	47	0.0132	0.0128	0.0131	Aim2, Anxa1, C1qa, C1qb, C1qc, C2, Cd14, Cd180, Cd84, Cd86, Cfh, Csf1, Csf1r, Dhx58, Eif2ak2, Hck, Ifih1, Ifit1, Ifit2, Ifit3, Il4ra, Inpp5d, Irf7, Isg20, Lat2, Lcn2, Lgals9, Ly86, Ly9, Mr1, Mx1, Oas2, Oasl2, Pglyrp1, Pycard, Rsad2, Smpdl3b, Ssc5d, Themis2, Tlr13, Tlr2, Tlr4, Tlr7, Tmem173, Unc93b1, Zc3h12a, Zc3hav1
GO:0070098	BP	e	chemokine-mediated signaling pathway	8/598	44/32695	1.19e-06	n.a.	8	0.0141	0.0137	0.0141	Ccl3, Ccl6, Cxcl10, Cxcl12, Cxcl13, Cxcl5, Foxc1, Pf4
GO:0045429	BP	e	positive regulation of nitric oxide biosynthetic process	8/598	44/32695	1.19e-06	n.a.	8	0.0141	0.0137	0.0141	Aif1, H2-M3, Itgb2, Klf2, Klf4, Ptgs2, Tlr2, Tlr4
GO:0010628	BP	e	positive regulation of gene expression	34/598	453/32695	1.25e-06	n.a.	34	0.0148	0.0145	0.0148	Aldh1a2, Atf3, Atoh8, Cav1, Ccr5, Cd44, Csf1, Ctsh, Eng, Fbln1, Foxc1, Foxd1, Hfe, Il18, Il1a, Il33, Klf4, Lcn2, Lgals9, Msn, Nfe2l2, Nos3, Osr1, Pf4, Ptgfr, Serpinb9, Slc11a1, Stat3, Tlr2, Tlr4, Tnfrsf1a, Vegfa, Vim, Zc3h12a
GO:0016477	BP	e	cell migration	18/598	229/32695	1.28e-06	n.a.	18	0.0152	0.0148	0.0152	Ang, Asap3, Cd151, Cd44, Clec14a, Eng, Fes, Foxc1, Gab2, Itgb2, Itgb5, Kdr, Nckap1l, Podxl, Rhoj, St14, Vegfa, Vtn
GO:0007155	BP	e	cell adhesion	33/598	518/32695	1.41e-06	n.a.	33	0.0168	0.0163	0.0167	Cd22, Cd33, Cd44, Cd84, Cd9, Cdh1, Cercam, Col6a1, Col6a2, Csf3r, Ctnnal1, Cx3cr1, Eng, Fblim1, Fermt3, Fes, Gpnmb, Hapln2, Itgam, Itgax, Itgb2, Itgb5, Ly9, Mag, Mpzl3, Parvg, Podxl, Scarf2, Spp1, Stab1, Thbs2, Vtn, Wisp1
GO:0050729	BP	e	positive regulation of inflammatory response	9/598	63/32695	2.12e-06	n.a.	9	0.0252	0.0245	0.0251	Ccl3, Ccl6, Ccr5, Ctss, Gpsm3, Il33, Tlr2, Tlr4, Tnfrsf1a
GO:0030316	BP	e	osteoclast differentiation	7/598	34/32695	2.32e-06	n.a.	7	0.0275	0.0268	0.0274	Csf1, Csf1r, Fcer1g, Gab2, Trem2, Trf, Tyrobp
GO:0042742	BP	e	defense response to bacterium	13/598	143/32695	2.46e-06	n.a.	13	0.0293	0.0285	0.0292	Anxa3, Cxcl13, Defb1, Fcer1g, H2-M3, Irf8, Isg15, Lyz2, Pglyrp1, Serpinb9, Slc11a1, Stab1, Tnfrsf1a
GO:0007165	BP	e	signal transduction	56/598	1261/32695	2.55e-06	n.a.	56	0.0303	0.0296	0.0302	Acvrl1, Adgrg6, Anxa1, Apbb1ip, Apln, Arap3, Arhgap18, Arhgap29, Arhgap30, Bdkrb2, C3ar1, C5ar1, Ccr5, Cd48, Cd86, Cx3cr1, Dcdc2a, Fcer1g, Fyb, Gabra6, Gna15, Gng11, Gpnmb, Gpr160, Gpr182, Gpr34, Gpr4, Gpr84, Hcar1, Hhex, Irak3, Lsp1, Nos3, P2rx4, P2ry6, Plce1, Plcg2, Plpp2, Plxnb3, Ptgfr, Rasa4, Rasal3, Rassf2, Rassf4, Rgl2, Rgl3, Rps6kb2, Socs3, Stat3, Tlr13, Tlr2, Tlr4, Tlr7, Tnfrsf11b, Tnfrsf…
GO:0032722	BP	e	positive regulation of chemokine production	6/598	23/32695	2.83e-06	n.a.	6	0.0336	0.0327	0.0335	Eif2ak2, Il18, Lgals9, Tlr2, Tlr4, Tlr7
GO:0032729	BP	e	positive regulation of interferon-gamma production	8/598	50/32695	3.26e-06	n.a.	8	0.0387	0.0378	0.0386	Cd14, H2-M3, Il18, Irf8, Pycard, Runx1, Slc11a1, Tlr4
GO:0035556	BP	e	intracellular signal transduction	22/598	397/32695	5.05e-06	n.a.	22	0.0599	0.0584	0.0597	Adcy7, Arhgap29, Asb11, Dcdc2a, Dmpk, Edn1, Gab2, Inpp5d, Irak3, Lat2, Myzap, Nrbp2, Oxsr1, Plce1, Plcg2, Plek, Rasa4, Rps6kb2, Socs3, Srpk3, Tns2, Vav1
GO:0002755	BP	e	MyD88-dependent toll-like receptor signaling pathway	5/598	15/32695	5.19e-06	n.a.	5	0.0617	0.0601	0.0615	Irak3, Tlr13, Tlr2, Tlr4, Tlr7
GO:0007229	BP	e	integrin-mediated signaling pathway	9/598	70/32695	5.2e-06	n.a.	9	0.0617	0.0602	0.0615	Fcer1g, Fermt3, Gab2, Itgax, Itgb2, Itgb5, Plek, Tyrobp, Vav1
GO:0050718	BP	e	positive regulation of interleukin-1 beta secretion	6/598	26/32695	6.16e-06	n.a.	6	0.0731	0.0712	0.0728	Aim2, Ccl3, Ccr5, Pycard, Tlr2, Tlr4
GO:0006629	BP	e	lipid metabolic process	24/598	465/32695	6.36e-06	n.a.	24	0.0755	0.0736	0.0752	A4galt, Apobr, Apod, Aspg, Ch25h, Crot, Elovl1, Enpp6, Hpgds, Lpcat2, Lpin3, Mboat1, Nr1h3, Oma1, Plce1, Plcg2, Pld4, Pnpla7, Ptgds, Ptges, Ptgs2, Slc16a11, Smpdl3b, Thrsp
GO:0030336	BP	e	negative regulation of cell migration	11/598	112/32695	6.92e-06	n.a.	11	0.0822	0.0801	0.0819	Acvrl1, Arap3, Arhgap4, Ccr5, Clic4, Cx3cr1, Eng, Jag1, Klf4, Plxnb3, Reck
GO:0042127	BP	e	regulation of cell proliferation	15/598	207/32695	7.17e-06	n.a.	15	0.0851	0.0829	0.0847	Anxa1, Apobec1, Cxcl10, Fes, Hck, Hhex, Il4ra, Jag1, Klf4, Pf4, Plau, Ptgs2, Sat1, Tal1, Tgfbr2
GO:0050728	BP	e	negative regulation of inflammatory response	10/598	93/32695	8.05e-06	n.a.	10	0.0956	0.0932	0.0952	Cd44, Lgals9, Nr1h3, Nt5e, Pglyrp1, Serpinf1, Smpdl3b, Socs3, Tnfrsf1a, Tnfrsf1b
GO:0071222	BP	e	cellular response to lipopolysaccharide	15/598	211/32695	9.02e-06	n.a.	15	0.107	0.104	0.107	Cd14, Cd180, Cd86, Cxcl10, Cxcl13, Cxcl5, Irf8, Litaf, Mrc1, Nr1h3, Pf4, Pycard, Tlr4, Tnfrsf1b, Zc3h12a
GO:0001516	BP	e	prostaglandin biosynthetic process	5/598	17/32695	1.04e-05	n.a.	5	0.123	0.12	0.123	Edn1, Hpgds, Ptgds, Ptges, Ptgs2
GO:0016064	BP	e	immunoglobulin mediated immune response	5/598	17/32695	1.04e-05	n.a.	5	0.123	0.12	0.123	C4b, Fcer1g, Il4ra, Inpp5d, Irf7
GO:0007204	BP	e	positive regulation of cytosolic calcium ion concentration	13/598	165/32695	1.19e-05	n.a.	13	0.141	0.137	0.14	Bdkrb2, C3ar1, C5ar1, Ccl28, Ccl3, Ccr5, Cx3cr1, Cxcl13, Edn1, Itpr3, Kdr, Plcg2, Ptgfr
GO:0043065	BP	e	positive regulation of apoptotic process	19/598	329/32695	1.24e-05	n.a.	19	0.147	0.143	0.146	Adamtsl4, Aldh1a1, Aldh1a2, Anxa1, Anxa5, Casp8, Eif2ak2, Ifit2, Il18, Inpp5d, Nos3, Nupr1, Ptgs2, Pycard, Rassf2, S100b, Steap3, Tlr4, Tnfsf10
GO:0048661	BP	e	positive regulation of smooth muscle cell proliferation	9/598	78/32695	1.28e-05	n.a.	9	0.152	0.148	0.151	Aif1, C3ar1, Cyba, Edn1, Il18, Ptgs2, Tgfbr2, Vegfa, Wisp1
GO:0034138	BP	e	toll-like receptor 3 signaling pathway	4/598	9/32695	1.3e-05	n.a.	4	0.154	0.15	0.153	Cd86, Colec12, Lgals9, Unc93b1
GO:0090197	BP	e	positive regulation of chemokine secretion	4/598	9/32695	1.3e-05	n.a.	4	0.154	0.15	0.153	Csf1r, Il33, Il4ra, Pycard
GO:0045730	BP	e	respiratory burst	4/598	9/32695	1.3e-05	n.a.	4	0.154	0.15	0.153	Cyba, Cybb, Ncf2, Slc11a1
GO:0051092	BP	e	positive regulation of NF-kappaB transcription factor activity	11/598	121/32695	1.45e-05	n.a.	11	0.173	0.168	0.172	Aim2, Cd84, Eif2ak2, Il18, Irak3, Itgb2, Pycard, Rab7b, Sphk1, Tlr2, Tlr4
GO:0032715	BP	e	negative regulation of interleukin-6 production	6/598	30/32695	1.49e-05	n.a.	6	0.177	0.173	0.176	Irak3, Klf2, Nckap1l, Tlr4, Tnfrsf1a, Zc3h12a
GO:0001774	BP	e	microglial cell activation	5/598	19/32695	1.89e-05	n.a.	5	0.225	0.219	0.224	Aif1, Cx3cr1, Tlr2, Tlr4, Tlr7
GO:0071223	BP	e	cellular response to lipoteichoic acid	4/598	10/32695	2.13e-05	n.a.	4	0.253	0.247	0.252	Cd14, Tlr2, Tlr4, Trem2
GO:1901224	BP	e	positive regulation of NIK/NF-kappaB signaling	7/598	47/32695	2.2e-05	n.a.	7	0.262	0.255	0.26	Cd14, Eif2ak2, Il18, Sphk1, Tlr2, Tlr4, Tlr7
GO:0030199	BP	e	collagen fibril organization	7/598	47/32695	2.2e-05	n.a.	7	0.262	0.255	0.26	Anxa2, Col11a2, Col5a2, Foxc1, Lox, Lum, Vps33b
GO:2001199	BP	e	negative regulation of dendritic cell differentiation	3/598	4/32695	2.4e-05	n.a.	3	0.285	0.278	0.284	H2-M3, Tmem176a, Tmem176b
GO:0034154	BP	e	toll-like receptor 7 signaling pathway	3/598	4/32695	2.4e-05	n.a.	3	0.285	0.278	0.284	Pik3ap1, Tlr7, Unc93b1
GO:1901532	BP	e	regulation of hematopoietic progenitor cell differentiation	3/598	4/32695	2.4e-05	n.a.	3	0.285	0.278	0.284	Eif2ak2, Kdr, Vegfa
GO:0014068	BP	e	positive regulation of phosphatidylinositol 3-kinase signaling	8/598	65/32695	2.41e-05	n.a.	8	0.286	0.279	0.285	Dcn, Hcls1, Il18, Kdr, Myoc, Pik3ap1, Prr5l, Rgl2
GO:0090050	BP	e	positive regulation of cell migration involved in sprouting angiogenesis	5/598	20/32695	2.49e-05	n.a.	5	0.295	0.288	0.293	Anxa1, Kdr, Ptgs2, Rhoj, Vegfa
GO:0001938	BP	e	positive regulation of endothelial cell proliferation	8/598	66/32695	2.7e-05	n.a.	8	0.321	0.313	0.319	Acvrl1, Ang, Cav1, Cxcl12, Cyba, Kdr, Plxnb3, Vegfa
GO:0070374	BP	e	positive regulation of ERK1 and ERK2 cascade	15/598	233/32695	2.91e-05	n.a.	15	0.345	0.336	0.343	C5ar1, Ccl3, Ccl6, Cd44, Csf1r, Glipr2, Gpnmb, Il1a, Kdr, P2ry6, Pycard, Tlr2, Tlr4, Trem2, Vegfa
GO:0006693	BP	e	prostaglandin metabolic process	5/598	21/32695	3.21e-05	n.a.	5	0.382	0.372	0.379	Hpgds, Ptgds, Ptges, Ptgs2, Tnfrsf1a
GO:0001501	BP	e	skeletal system development	10/598	109/32695	3.27e-05	n.a.	10	0.389	0.379	0.386	Col11a2, Col5a2, Edn1, Foxc1, Hapln2, Hexa, Hexb, Rassf2, Runx1, Zic1
GO:0006826	BP	e	iron ion transport	4/598	11/32695	3.3e-05	n.a.	4	0.392	0.382	0.39	Fth1, Slc11a1, Steap3, Trf
GO:0042554	BP	e	superoxide anion generation	4/598	11/32695	3.3e-05	n.a.	4	0.392	0.382	0.39	Cyba, Cybb, Edn1, Ncf2
GO:0006952	BP	e	defense response	10/598	110/32695	3.54e-05	n.a.	10	0.421	0.41	0.418	Ccr5, Cxcl10, Cxcl12, Cxcl13, Cxcl5, Defb1, Lsp1, Pf4, Ssc5d, Tnfrsf1a
GO:0032088	BP	e	negative regulation of NF-kappaB transcription factor activity	8/598	69/32695	3.75e-05	n.a.	8	0.445	0.434	0.442	Aim2, Anxa4, Cdk5rap3, Dap, Irak3, Klf4, Pycard, Zc3h12a
GO:0071498	BP	e	cellular response to fluid shear stress	4/598	12/32695	4.88e-05	n.a.	4	0.579	0.565	0.576	Klf2, Nfe2l2, Ptgs2, Spp1
GO:0045576	BP	e	mast cell activation	4/598	12/32695	4.88e-05	n.a.	4	0.579	0.565	0.576	Cd48, Fcer1g, Fyb, Tlr4
GO:0048662	BP	e	negative regulation of smooth muscle cell proliferation	6/598	37/32695	5.24e-05	n.a.	6	0.622	0.606	0.618	Aif1, Ang, Apod, Cav1, Klf4, Nos3
GO:0001503	BP	e	ossification	9/598	94/32695	5.77e-05	n.a.	9	0.685	0.668	0.681	Csf1, Dlk1, Dmp1, Foxc1, Kazald1, Mgp, Rassf2, Rsad2, Spp1
GO:0035633	BP	e	maintenance of permeability of blood-brain barrier	3/598	5/32695	5.92e-05	n.a.	3	0.703	0.686	0.699	Bdkrb2, Mbp, Ptgs2
GO:0003100	BP	e	regulation of systemic arterial blood pressure by endothelin	3/598	5/32695	5.92e-05	n.a.	3	0.703	0.686	0.699	Edn1, Edn3, Nos3
GO:1990869	BP	e	cellular response to chemokine	3/598	5/32695	5.92e-05	n.a.	3	0.703	0.686	0.699	Dock8, Foxc1, Zc3h12a
GO:0008283	BP	e	cell proliferation	14/598	220/32695	6.03e-05	n.a.	14	0.716	0.698	0.711	Appl2, Cdk5rap3, Csf1, Csf1r, Foxc1, Hhex, Il18, Mvp, Nupr1, Stat3, Tbx1, Tnfrsf1b, Vegfa, Vtn
GO:0007159	BP	e	leukocyte cell-cell adhesion	5/598	24/32695	6.41e-05	n.a.	5	0.762	0.742	0.756	Fermt3, Itgam, Itgb2, Nt5e, Ptprc
GO:0045648	BP	e	positive regulation of erythrocyte differentiation	5/598	24/32695	6.41e-05	n.a.	5	0.762	0.742	0.756	Inpp5d, Isg15, Nckap1l, Stat3, Tal1
GO:0050679	BP	e	positive regulation of epithelial cell proliferation	8/598	75/32695	6.87e-05	n.a.	8	0.816	0.795	0.81	C5ar1, Grn, Kdr, Osr1, Prl, Tbx1, Tbx18, Vegfa
GO:0001666	BP	e	response to hypoxia	10/598	119/32695	6.94e-05	n.a.	10	0.824	0.803	0.818	Alas2, Ang, Cav1, Cryab, Edn1, Eng, Il18, Kdr, Plau, Vegfa
GO:0045651	BP	e	positive regulation of macrophage differentiation	4/598	13/32695	6.95e-05	n.a.	4	0.825	0.804	0.819	Casp8, Csf1, Hcls1, Pf4
GO:0032727	BP	e	positive regulation of interferon-alpha production	4/598	13/32695	6.95e-05	n.a.	4	0.825	0.804	0.819	Ifih1, Irf7, Tlr4, Zc3hav1
GO:0045824	BP	e	negative regulation of innate immune response	4/598	13/32695	6.95e-05	n.a.	4	0.825	0.804	0.819	Dhx58, Irak3, Nmi, Smpdl3b
GO:0030595	BP	e	leukocyte chemotaxis	5/598	25/32695	7.9e-05	n.a.	5	0.938	0.914	0.931	Ccl3, Cxcl10, Cxcl13, Cxcl5, Pf4
GO:2000778	BP	e	positive regulation of interleukin-6 secretion	5/598	25/32695	7.9e-05	n.a.	5	0.938	0.914	0.931	Ifih1, Lgals9, Mbp, Pycard, Unc93b1
GO:0001569	BP	e	branching involved in blood vessel morphogenesis	6/598	40/32695	8.26e-05	n.a.	6	0.981	0.956	0.973	Cxcl12, Edn1, Eng, Tbx1, Tgfbr2, Vegfa
GO:0030154	BP	e	cell differentiation	35/598	932/32695	8.72e-05	n.a.	35	1	1	1	Ang, Atoh8, Bhlhe41, Cav1, Csf1r, Dlk1, Eya2, Eya4, Fes, Flnb, Foxc1, Foxd1, Hck, Hhex, Hlx, Kazald1, Kdr, Klf4, Mgp, Nr1h3, Osr1, Pmp22, Robo3, Slfn5, Smoc1, Spi1, Srpk3, Tal1, Tbx18, Tgfbr2, Tmem176b, Vamp5, Vegfa, Zc3h12a, Zic1
GO:0045071	BP	e	negative regulation of viral genome replication	6/598	41/32695	9.53e-05	n.a.	6	1	1	1	Eif2ak2, Isg15, Isg20, Oasl2, Rsad2, Zc3hav1
GO:0030225	BP	e	macrophage differentiation	4/598	14/32695	9.59e-05	n.a.	4	1	1	1	Casp8, Csf1, Spi1, Vegfa
GO:0032728	BP	e	positive regulation of interferon-beta production	5/598	26/32695	9.63e-05	n.a.	5	1	1	1	Ifih1, Irf7, Tlr2, Tlr4, Zc3hav1
GO:0060326	BP	e	cell chemotaxis	8/598	80/32695	0.000109	n.a.	8	1	1	1	Ccl28, Ccl6, Ccr5, Cx3cr1, Cxcl12, Eng, Plxnb3, Vegfa
GO:0001974	BP	e	blood vessel remodeling	6/598	42/32695	0.000109	n.a.	6	1	1	1	Acvrl1, Foxc1, Jag1, Nos3, Tbx1, Vegfa
GO:0071499	BP	e	cellular response to laminar fluid shear stress	3/598	6/32695	0.000117	n.a.	3	1	1	1	Klf2, Klf4, Nfe2l2
GO:2000483	BP	e	negative regulation of interleukin-8 secretion	3/598	6/32695	0.000117	n.a.	3	1	1	1	Anxa1, Anxa4, Ssc5d
GO:0030203	BP	e	glycosaminoglycan metabolic process	3/598	6/32695	0.000117	n.a.	3	1	1	1	Foxc1, Hexa, Hexb
GO:0045601	BP	e	regulation of endothelial cell differentiation	3/598	6/32695	0.000117	n.a.	3	1	1	1	Apold1, Kdr, Vegfa
GO:0071360	BP	e	cellular response to exogenous dsRNA	4/598	15/32695	0.000129	n.a.	4	1	1	1	Cav1, Ifih1, Tmem173, Zc3hav1
GO:0031663	BP	e	lipopolysaccharide-mediated signaling pathway	5/598	29/32695	0.000166	n.a.	5	1	1	1	Cd14, Il18, Nos3, Tlr4, Trem2
GO:0010614	BP	e	negative regulation of cardiac muscle hypertrophy	4/598	16/32695	0.000169	n.a.	4	1	1	1	Fbxo32, P2rx4, Tnfrsf1a, Tnfrsf1b
GO:0043306	BP	e	positive regulation of mast cell degranulation	4/598	16/32695	0.000169	n.a.	4	1	1	1	Fcer1g, Gab2, Il4ra, Stxbp2
GO:0003429	BP	e	growth plate cartilage chondrocyte morphogenesis	4/598	16/32695	0.000169	n.a.	4	1	1	1	Col6a1, Col6a2, Col6a3, Vwa1
GO:0019221	BP	e	cytokine-mediated signaling pathway	9/598	108/32695	0.000169	n.a.	9	1	1	1	Crlf2, Csf1r, Cx3cr1, Il10rb, Il1a, Irak3, Pf4, Stat3, Tnfrsf1a
GO:0007264	BP	e	small GTPase mediated signal transduction	8/598	87/32695	0.000197	n.a.	8	1	1	1	Arhgap18, Arhgap30, Dock8, Plce1, Rgl2, Rgl3, Rhoj, Vav1
GO:0045639	BP	e	positive regulation of myeloid cell differentiation	3/598	7/32695	0.000202	n.a.	3	1	1	1	Fes, Hbb-b2, Jag1
GO:0001937	BP	e	negative regulation of endothelial cell proliferation	5/598	31/32695	0.000231	n.a.	5	1	1	1	Acvrl1, Atoh8, Cav1, Eng, Prl
GO:0042832	BP	e	defense response to protozoan	5/598	32/32695	0.000269	n.a.	5	1	1	1	Cd37, Il4ra, Irf8, Pf4, Slc11a1
GO:0043032	BP	e	positive regulation of macrophage activation	4/598	18/32695	0.000276	n.a.	4	1	1	1	Il33, Il4ra, Lgals9, Tlr4
GO:0010466	BP	e	negative regulation of peptidase activity	9/598	116/32695	0.00029	n.a.	9	1	1	1	Cast, Cd109, Cst7, Cstb, Itih2, Reck, Serpina3n, Serpinb1a, Tfpi
GO:2001238	BP	e	positive regulation of extrinsic apoptotic signaling pathway	5/598	33/32695	0.000313	n.a.	5	1	1	1	Casp8, Cav1, Ptprc, Pycard, Tnfsf10
GO:0001819	BP	e	positive regulation of cytokine production	5/598	33/32695	0.000313	n.a.	5	1	1	1	Dlk1, Eif2ak2, Il33, Lgals9, Slc11a1
GO:0001960	BP	e	negative regulation of cytokine-mediated signaling pathway	3/598	8/32695	0.000318	n.a.	3	1	1	1	Cav1, Irak3, Ptprc
GO:0032494	BP	e	response to peptidoglycan	3/598	8/32695	0.000318	n.a.	3	1	1	1	C5ar1, Irak3, Tlr2
GO:0014740	BP	e	negative regulation of muscle hyperplasia	2/598	2/32695	0.000334	n.a.	2	1	1	1	Klf4, Nos3
GO:0097533	BP	e	cellular stress response to acid chemical	2/598	2/32695	0.000334	n.a.	2	1	1	1	Klf2, Vegfa
GO:0002764	BP	e	immune response-regulating signaling pathway	2/598	2/32695	0.000334	n.a.	2	1	1	1	Ctsh, Lat2
GO:0002282	BP	e	microglial cell activation involved in immune response	2/598	2/32695	0.000334	n.a.	2	1	1	1	Cx3cr1, Il33
GO:0010819	BP	e	regulation of T cell chemotaxis	2/598	2/32695	0.000334	n.a.	2	1	1	1	Cxcl10, Lgals9
GO:1904685	BP	e	positive regulation of metalloendopeptidase activity	2/598	2/32695	0.000334	n.a.	2	1	1	1	Mbp, Stat3
GO:0002380	BP	e	immunoglobulin secretion involved in immune response	2/598	2/32695	0.000334	n.a.	2	1	1	1	Crlf2, Pou2f2
GO:1903974	BP	e	positive regulation of cellular response to macrophage colony-stimulating factor stimulus	2/598	2/32695	0.000334	n.a.	2	1	1	1	Tlr2, Tlr4
GO:0002588	BP	e	positive regulation of antigen processing and presentation of peptide antigen via MHC class II	2/598	2/32695	0.000334	n.a.	2	1	1	1	Pycard, Trem2
GO:0072268	BP	e	pattern specification involved in metanephros development	2/598	2/32695	0.000334	n.a.	2	1	1	1	Foxd1, Osr1
GO:0003057	BP	e	regulation of the force of heart contraction by chemical signal	2/598	2/32695	0.000334	n.a.	2	1	1	1	Cav1, Nos3
GO:0050880	BP	e	regulation of blood vessel size	4/598	19/32695	0.000345	n.a.	4	1	1	1	Edn1, Edn3, Foxc1, Nos3
GO:0032930	BP	e	positive regulation of superoxide anion generation	4/598	19/32695	0.000345	n.a.	4	1	1	1	Cyba, Il18, Itgam, Itgb2
GO:0042310	BP	e	vasoconstriction	4/598	19/32695	0.000345	n.a.	4	1	1	1	Bdkrb2, Cav1, Edn1, Edn3
GO:0048514	BP	e	blood vessel morphogenesis	5/598	34/32695	0.000361	n.a.	5	1	1	1	Acvrl1, Edn1, Lox, Tbx1, Vegfa
GO:0042327	BP	e	positive regulation of phosphorylation	5/598	35/32695	0.000415	n.a.	5	1	1	1	Ang, Apln, Nckap1l, Trf, Vegfa
GO:0042307	BP	e	positive regulation of protein import into nucleus	5/598	35/32695	0.000415	n.a.	5	1	1	1	Cdh1, Hcls1, Ptgs2, Zc3h12a, Zic1
GO:0022408	BP	e	negative regulation of cell-cell adhesion	4/598	20/32695	0.000425	n.a.	4	1	1	1	Cdh1, Jag1, Podxl, Vegfa
GO:0002218	BP	e	activation of innate immune response	4/598	20/32695	0.000425	n.a.	4	1	1	1	Aim2, Pycard, Tlr4, Tmem173
GO:0030853	BP	e	negative regulation of granulocyte differentiation	3/598	9/32695	0.000471	n.a.	3	1	1	1	C1qc, Inpp5d, Runx1
GO:0019953	BP	e	sexual reproduction	3/598	9/32695	0.000471	n.a.	3	1	1	1	Hexa, Hexb, Stat3
GO:0031274	BP	e	positive regulation of pseudopodium assembly	3/598	9/32695	0.000471	n.a.	3	1	1	1	Cdc42ep1, Cdc42ep2, Cdc42ep5
GO:0050798	BP	e	activated T cell proliferation	3/598	9/32695	0.000471	n.a.	3	1	1	1	Itgam, Itgax, Itgb2
GO:0002690	BP	e	positive regulation of leukocyte chemotaxis	3/598	9/32695	0.000471	n.a.	3	1	1	1	Cxcl10, Edn3, Gpsm3
GO:0002053	BP	e	positive regulation of mesenchymal cell proliferation	5/598	36/32695	0.000475	n.a.	5	1	1	1	Kdr, Tbx1, Tbx18, Tgfbr2, Vegfa
GO:0007275	BP	e	multicellular organism development	37/598	1095/32695	0.000485	n.a.	37	1	1	1	Ang, Apln, Atoh8, Bicc1, Cdh1, Cdh19, Csf1r, Dnase2a, Eya2, Eya4, Foxc1, Foxd1, Gatm, Hhex, Jag1, Kazald1, Kdr, Mgp, Nes, Nkx2-9, Nr1h3, Plekhb1, Prickle3, Robo3, Rreb1, Shtn1, Smoc1, Srpk3, Ssc5d, Tal1, Tbx1, Tbx18, Vamp5, Vegfa, Zc3h12a, Zfp36l2, Zic1
GO:0035162	BP	e	embryonic hemopoiesis	4/598	21/32695	0.000518	n.a.	4	1	1	1	Kdr, Runx1, Tal1, Tgfbr2
GO:0051899	BP	e	membrane depolarization	4/598	21/32695	0.000518	n.a.	4	1	1	1	Cav1, Edn1, P2rx4, Shtn1
GO:0010634	BP	e	positive regulation of epithelial cell migration	5/598	37/32695	0.000541	n.a.	5	1	1	1	Ctsh, Gab2, Glipr2, Rreb1, Tgfbr2
GO:0035458	BP	e	cellular response to interferon-beta	5/598	37/32695	0.000541	n.a.	5	1	1	1	Aim2, Ifi203, Ifit1, Ifit3, Tmem173
GO:0008217	BP	e	regulation of blood pressure	6/598	56/32695	0.000546	n.a.	6	1	1	1	Acvrl1, C3ar1, Cyba, Edn1, P2rx4, Ptgs2
GO:0055114	BP	e	oxidation-reduction process	25/598	652/32695	0.000547	n.a.	25	1	1	1	Akr1b8, Aldh1a1, Aldh1a2, Aldh1l2, Aox3, Cbr2, Ch25h, Cyba, Cybb, Cyp27a1, Cyp2e1, Cyp2j12, Dcxr, Ddo, Dnajc24, Fmo2, Fmo5, Fth1, Lox, Nos3, Pir, Ptges, Ptgs2, Qdpr, Steap3
GO:0050853	BP	e	B cell receptor signaling pathway	5/598	38/32695	0.000613	n.a.	5	1	1	1	Klhl6, Lat2, Nckap1l, Plcg2, Ptprc
GO:0045595	BP	e	regulation of cell differentiation	5/598	38/32695	0.000613	n.a.	5	1	1	1	Fes, Klf4, Plekhb1, Runx1, Socs3
GO:0043536	BP	e	positive regulation of blood vessel endothelial cell migration	5/598	38/32695	0.000613	n.a.	5	1	1	1	Kdr, Nfe2l2, Nos3, P2rx4, Vegfa
GO:0031623	BP	e	receptor internalization	5/598	38/32695	0.000613	n.a.	5	1	1	1	Cav1, Cd9, Fcer1g, Itgb2, Snx1
GO:0090023	BP	e	positive regulation of neutrophil chemotaxis	4/598	22/32695	0.000624	n.a.	4	1	1	1	C3ar1, C5ar1, Edn1, Nckap1l
GO:0030031	BP	e	cell projection assembly	4/598	22/32695	0.000624	n.a.	4	1	1	1	Capg, Nckap1l, Parvg, Rhoj
GO:0006956	BP	e	complement activation	3/598	10/32695	0.000664	n.a.	3	1	1	1	C2, C4b, Cfh
GO:0008152	BP	e	metabolic process	18/598	412/32695	0.000667	n.a.	18	1	1	1	Alas2, Aldh1a1, Aldh1a2, Aldh1l2, Aspa, Bcat2, Enpp6, Fah, Hexa, Hexb, Hk2, Lpcat2, Lyz2, Man2b1, Naalad2, Pnpla7, Smpdl3b, Sphk1
GO:0055072	BP	e	iron ion homeostasis	5/598	39/32695	0.000693	n.a.	5	1	1	1	Hfe, Lcn2, Slc11a1, Steap3, Trf
GO:0010951	BP	e	negative regulation of endopeptidase activity	7/598	83/32695	0.000827	n.a.	7	1	1	1	Reck, Renbp, Serpina3n, Serpinb1a, Serpinb9, Serpinf1, Vtn
GO:0030324	BP	e	lung development	8/598	108/32695	0.000849	n.a.	8	1	1	1	Aldh1a2, Kdr, Lox, Mgp, Nkx2-9, Nos3, Tgfbr2, Vegfa
GO:0042098	BP	e	T cell proliferation	4/598	24/32695	0.00088	n.a.	4	1	1	1	Cd151, Cxcl12, Msn, Ptprc
GO:0032733	BP	e	positive regulation of interleukin-10 production	4/598	24/32695	0.00088	n.a.	4	1	1	1	Cd83, Fcer1g, Tlr2, Tlr4
GO:0042474	BP	e	middle ear morphogenesis	4/598	24/32695	0.00088	n.a.	4	1	1	1	Edn1, Eya4, Osr1, Tbx1
GO:0010575	BP	e	positive regulation of vascular endothelial growth factor production	4/598	24/32695	0.00088	n.a.	4	1	1	1	C3ar1, C5ar1, Il1a, Ptgs2
GO:0045088	BP	e	regulation of innate immune response	3/598	11/32695	0.0009	n.a.	3	1	1	1	Dhx58, Irf7, Myo1f
GO:0007035	BP	e	vacuolar acidification	3/598	11/32695	0.0009	n.a.	3	1	1	1	Clic4, Slc11a1, Tcirg1
GO:0010744	BP	e	positive regulation of macrophage derived foam cell differentiation	3/598	11/32695	0.0009	n.a.	3	1	1	1	Csf1, Il18, Pf4
GO:0034142	BP	e	toll-like receptor 4 signaling pathway	3/598	11/32695	0.0009	n.a.	3	1	1	1	Cd14, Pik3ap1, Tlr4
GO:0035457	BP	e	cellular response to interferon-alpha	3/598	11/32695	0.0009	n.a.	3	1	1	1	Ifit1, Ifit2, Ifit3
GO:0051901	BP	e	positive regulation of mitochondrial depolarization	3/598	11/32695	0.0009	n.a.	3	1	1	1	Dcn, Kdr, Myoc
GO:1901380	BP	e	negative regulation of potassium ion transmembrane transport	3/598	11/32695	0.0009	n.a.	3	1	1	1	Cav1, Kcne1l, Oxsr1
GO:0014889	BP	e	muscle atrophy	2/598	3/32695	0.00099	n.a.	2	1	1	1	Fbxo32, Gatm
GO:0045347	BP	e	negative regulation of MHC class II biosynthetic process	2/598	3/32695	0.00099	n.a.	2	1	1	1	Pf4, Spi1
GO:0003177	BP	e	pulmonary valve development	2/598	3/32695	0.00099	n.a.	2	1	1	1	Tnfrsf1a, Tnfrsf1b
GO:1902339	BP	e	positive regulation of apoptotic process involved in morphogenesis	2/598	3/32695	0.00099	n.a.	2	1	1	1	Tnfrsf1a, Tnfrsf1b
GO:0003332	BP	e	negative regulation of extracellular matrix constituent secretion	2/598	3/32695	0.00099	n.a.	2	1	1	1	Tnfrsf1a, Tnfrsf1b
GO:0045103	BP	e	intermediate filament-based process	2/598	3/32695	0.00099	n.a.	2	1	1	1	Gfap, Vim
GO:1900390	BP	e	regulation of iron ion import	2/598	3/32695	0.00099	n.a.	2	1	1	1	Hfe, Trf
GO:0002757	BP	e	immune response-activating signal transduction	2/598	3/32695	0.00099	n.a.	2	1	1	1	Skap2, Zc3h12a
GO:0032608	BP	e	interferon-beta production	2/598	3/32695	0.00099	n.a.	2	1	1	1	Irf7, Tmem173
GO:0038145	BP	e	macrophage colony-stimulating factor signaling pathway	2/598	3/32695	0.00099	n.a.	2	1	1	1	Csf1, Csf1r
GO:0005997	BP	e	xylulose metabolic process	2/598	3/32695	0.00099	n.a.	2	1	1	1	Cbr2, Dcxr
GO:1903237	BP	e	negative regulation of leukocyte tethering or rolling	2/598	3/32695	0.00099	n.a.	2	1	1	1	Ccl28, Cxcl12
GO:0090500	BP	e	endocardial cushion to mesenchymal transition	2/598	3/32695	0.00099	n.a.	2	1	1	1	Acvrl1, Eng
GO:0071727	BP	e	cellular response to triacyl bacterial lipopeptide	2/598	3/32695	0.00099	n.a.	2	1	1	1	Cd14, Tlr2
GO:0019371	BP	e	cyclooxygenase pathway	2/598	3/32695	0.00099	n.a.	2	1	1	1	Ptgs2, Sphk1
GO:0032735	BP	e	positive regulation of interleukin-12 production	4/598	25/32695	0.00103	n.a.	4	1	1	1	H2-M3, Irf8, Tlr2, Tlr4
GO:0033137	BP	e	negative regulation of peptidyl-serine phosphorylation	4/598	25/32695	0.00103	n.a.	4	1	1	1	Bdkrb2, Cav1, Mlxipl, Rassf2
GO:0048844	BP	e	artery morphogenesis	4/598	25/32695	0.00103	n.a.	4	1	1	1	Eng, Foxc1, Tbx1, Vegfa
GO:0030099	BP	e	myeloid cell differentiation	4/598	25/32695	0.00103	n.a.	4	1	1	1	Irf8, Pir, Runx1, Tal1
GO:0070527	BP	e	platelet aggregation	4/598	25/32695	0.00103	n.a.	4	1	1	1	Fermt3, Plek, Slc7a11, Stxbp3
GO:0006869	BP	e	lipid transport	8/598	112/32695	0.00108	n.a.	8	1	1	1	Abca8a, Abca9, Apobr, Apod, Cav1, Esyt1, Gltp, Pctp
GO:0006879	BP	e	cellular iron ion homeostasis	5/598	43/32695	0.00109	n.a.	5	1	1	1	Alas2, Fth1, Hfe, Slc11a1, Trf
GO:0042552	BP	e	myelination	6/598	64/32695	0.00111	n.a.	6	1	1	1	Adgrg6, Hexa, Hexb, Lgi4, Mbp, Pmp22
GO:0031953	BP	e	negative regulation of protein autophosphorylation	3/598	12/32695	0.00118	n.a.	3	1	1	1	Eng, Mvp, Ptprc
GO:0007252	BP	e	I-kappaB phosphorylation	3/598	12/32695	0.00118	n.a.	3	1	1	1	Tlr2, Tlr4, Tlr7
GO:0034101	BP	e	erythrocyte homeostasis	3/598	12/32695	0.00118	n.a.	3	1	1	1	Ampd3, Klf2, Nckap1l
GO:0032700	BP	e	negative regulation of interleukin-17 production	3/598	12/32695	0.00118	n.a.	3	1	1	1	Nckap1l, Tlr2, Tlr4
GO:0002237	BP	e	response to molecule of bacterial origin	3/598	12/32695	0.00118	n.a.	3	1	1	1	Cd14, H2-M3, Tlr2
GO:0043066	BP	e	negative regulation of apoptotic process	22/598	568/32695	0.00119	n.a.	22	1	1	1	Aif1, Btg2, Cd44, Cryab, Csf1r, Ctsh, Eif2ak2, Fam129b, Hck, Kdr, Nckap1l, Osr1, Ptgfr, Ptgs2, Serpinb9, Socs3, Sphk1, Spp1, Stat3, Tnfrsf18, Tnfrsf1a, Vegfa
GO:0032757	BP	e	positive regulation of interleukin-8 production	4/598	26/32695	0.0012	n.a.	4	1	1	1	Il18, Tlr2, Tlr4, Tlr7
GO:0045780	BP	e	positive regulation of bone resorption	4/598	26/32695	0.0012	n.a.	4	1	1	1	Car2, Dlk1, Spp1, Trf
GO:0045672	BP	e	positive regulation of osteoclast differentiation	4/598	26/32695	0.0012	n.a.	4	1	1	1	Car2, Ccl3, Csf1, Csf1r
GO:0010595	BP	e	positive regulation of endothelial cell migration	5/598	45/32695	0.00134	n.a.	5	1	1	1	Anxa3, Atoh8, Kdr, Vegfa, Zc3h12a
GO:0050766	BP	e	positive regulation of phagocytosis	5/598	45/32695	0.00134	n.a.	5	1	1	1	Cyba, Fcer1g, Pros1, Pycard, Slc11a1
GO:0032689	BP	e	negative regulation of interferon-gamma production	4/598	27/32695	0.00139	n.a.	4	1	1	1	Il33, Lgals9, Pglyrp1, Tlr4
GO:0002230	BP	e	positive regulation of defense response to virus by host	4/598	27/32695	0.00139	n.a.	4	1	1	1	Aim2, Pycard, Tmem173, Zc3h12a
GO:0001945	BP	e	lymph vessel development	3/598	13/32695	0.00152	n.a.	3	1	1	1	Foxc1, Kdr, Tbx1
GO:2000484	BP	e	positive regulation of interleukin-8 secretion	3/598	13/32695	0.00152	n.a.	3	1	1	1	Cd14, Pycard, Tlr2
GO:0070997	BP	e	neuron death	3/598	13/32695	0.00152	n.a.	3	1	1	1	Ccr5, Klk6, Plau
GO:0071404	BP	e	cellular response to low-density lipoprotein particle stimulus	3/598	13/32695	0.00152	n.a.	3	1	1	1	Cd9, Fcer1g, Itgb2
GO:0042535	BP	e	positive regulation of tumor necrosis factor biosynthetic process	3/598	13/32695	0.00152	n.a.	3	1	1	1	Cybb, Tlr2, Tlr4
GO:0032743	BP	e	positive regulation of interleukin-2 production	3/598	13/32695	0.00152	n.a.	3	1	1	1	Anxa1, Cd83, Runx1
GO:0006633	BP	e	fatty acid biosynthetic process	6/598	68/32695	0.00153	n.a.	6	1	1	1	Elovl1, Hpgds, Nr1h3, Ptgds, Ptges, Ptgs2
GO:0007162	BP	e	negative regulation of cell adhesion	5/598	47/32695	0.00164	n.a.	5	1	1	1	Acvrl1, Fbln1, Myo1f, Plxnb3, Podxl
GO:0030218	BP	e	erythrocyte differentiation	5/598	47/32695	0.00164	n.a.	5	1	1	1	Alas2, Dnase2a, Hcls1, Spi1, Tal1
GO:0043547	BP	e	positive regulation of GTPase activity	9/598	149/32695	0.00175	n.a.	9	1	1	1	Adap2, Arap3, Asap3, Ccl3, Ccl6, Dock8, Rgl3, Snx9, Vav1
GO:0006897	BP	e	endocytosis	10/598	179/32695	0.00178	n.a.	10	1	1	1	Asgr1, Cav1, Dennd1c, Micall1, Mrc1, Mrc2, Rhoj, Snx1, Snx9, Wipf1
GO:0006904	BP	e	vesicle docking involved in exocytosis	4/598	29/32695	0.00183	n.a.	4	1	1	1	Plek, Stxbp2, Stxbp3, Vps33b
GO:0070371	BP	e	ERK1 and ERK2 cascade	4/598	29/32695	0.00183	n.a.	4	1	1	1	Ctsh, Kdr, Trf, Zfp36l2
GO:1902895	BP	e	positive regulation of pri-miRNA transcription by RNA polymerase II	4/598	29/32695	0.00183	n.a.	4	1	1	1	Apln, Prl, Spi1, Stat3
GO:0010629	BP	e	negative regulation of gene expression	14/598	310/32695	0.00188	n.a.	14	1	1	1	Acvrl1, Aif1, Apln, Atoh8, Cryab, Eng, Kdr, Klf4, Lgals9, Mir124a-1hg, Serpinf1, Tnfrsf1a, Vegfa, Zc3h12a
GO:0061014	BP	e	positive regulation of mRNA catabolic process	3/598	14/32695	0.00191	n.a.	3	1	1	1	Prr5l, Zc3h12a, Zc3hav1
GO:0043129	BP	e	surfactant homeostasis	3/598	14/32695	0.00191	n.a.	3	1	1	1	Ctsh, Kdr, Vegfa
GO:1902219	BP	e	negative regulation of intrinsic apoptotic signaling pathway in response to osmotic stress	2/598	4/32695	0.00196	n.a.	2	1	1	1	Bdkrb2, Ptgs2
GO:0051142	BP	e	positive regulation of NK T cell proliferation	2/598	4/32695	0.00196	n.a.	2	1	1	1	Il18, Rasal3
GO:0003176	BP	e	aortic valve development	2/598	4/32695	0.00196	n.a.	2	1	1	1	Tnfrsf1a, Tnfrsf1b
GO:0002666	BP	e	positive regulation of T cell tolerance induction	2/598	4/32695	0.00196	n.a.	2	1	1	1	H2-M3, Tgfbr2
GO:0014005	BP	e	microglia development	2/598	4/32695	0.00196	n.a.	2	1	1	1	Itgam, Tlr2
GO:0045123	BP	e	cellular extravasation	2/598	4/32695	0.00196	n.a.	2	1	1	1	Itgam, Itgb2
GO:0043378	BP	e	positive regulation of CD8-positive, alpha-beta T cell differentiation	2/598	4/32695	0.00196	n.a.	2	1	1	1	Nckap1l, Runx1
GO:0003374	BP	e	dynamin family protein polymerization involved in mitochondrial fission	2/598	4/32695	0.00196	n.a.	2	1	1	1	Mx1, Mx2
GO:0043315	BP	e	positive regulation of neutrophil degranulation	2/598	4/32695	0.00196	n.a.	2	1	1	1	Itgam, Itgb2
GO:0043312	BP	e	neutrophil degranulation	2/598	4/32695	0.00196	n.a.	2	1	1	1	Anxa3, Myo1f
GO:0007589	BP	e	body fluid secretion	2/598	4/32695	0.00196	n.a.	2	1	1	1	Anxa2, Edn1
GO:0048002	BP	e	antigen processing and presentation of peptide antigen	2/598	4/32695	0.00196	n.a.	2	1	1	1	Ctss, Slc11a1
GO:0070574	BP	e	cadmium ion transmembrane transport	2/598	4/32695	0.00196	n.a.	2	1	1	1	Slc11a1, Slc39a8
GO:2000255	BP	e	negative regulation of male germ cell proliferation	2/598	4/32695	0.00196	n.a.	2	1	1	1	Hpgds, Ptgds
GO:0032275	BP	e	luteinizing hormone secretion	2/598	4/32695	0.00196	n.a.	2	1	1	1	Cga, Foxd1
GO:0071726	BP	e	cellular response to diacyl bacterial lipopeptide	2/598	4/32695	0.00196	n.a.	2	1	1	1	Cd14, Tlr2
GO:0014826	BP	e	vein smooth muscle contraction	2/598	4/32695	0.00196	n.a.	2	1	1	1	Edn1, Edn3
GO:0032497	BP	e	detection of lipopolysaccharide	2/598	4/32695	0.00196	n.a.	2	1	1	1	Tlr4, Trem2
GO:0002730	BP	e	regulation of dendritic cell cytokine production	2/598	4/32695	0.00196	n.a.	2	1	1	1	Tlr2, Tlr4
GO:0030838	BP	e	positive regulation of actin filament polymerization	5/598	49/32695	0.00198	n.a.	5	1	1	1	Cdc42ep1, Cdc42ep2, Cdc42ep5, Nckap1l, Pycard
GO:0006915	BP	e	apoptotic process	21/598	559/32695	0.00203	n.a.	21	1	1	1	Adamtsl4, Aim2, C5ar1, Casp8, Dap, Dnase2a, Ifit2, Inpp5d, Irak3, Lcn2, Lsp1, Pglyrp1, Pycard, Steap3, Tgfbr2, Tmem173, Tnfrsf11b, Tnfrsf18, Tnfrsf1a, Tnfsf10, Zc3h12a
GO:0032355	BP	e	response to estradiol	4/598	30/32695	0.00208	n.a.	4	1	1	1	Grn, Nos3, Ptgfr, Stat3
GO:2000379	BP	e	positive regulation of reactive oxygen species metabolic process	4/598	30/32695	0.00208	n.a.	4	1	1	1	Nfe2l2, Plau, Tgfbr2, Zc3h12a
GO:0071560	BP	e	cellular response to transforming growth factor beta stimulus	5/598	50/32695	0.00216	n.a.	5	1	1	1	Acvrl1, Cav1, Nos3, Runx1, Zfp36l2
GO:1904469	BP	e	positive regulation of tumor necrosis factor secretion	3/598	15/32695	0.00235	n.a.	3	1	1	1	Cd84, Ifih1, Tlr2
GO:0042730	BP	e	fibrinolysis	3/598	15/32695	0.00235	n.a.	3	1	1	1	Anxa2, Plau, Pros1
GO:0030195	BP	e	negative regulation of blood coagulation	3/598	15/32695	0.00235	n.a.	3	1	1	1	Anxa5, Pros1, Tfpi
GO:0051492	BP	e	regulation of stress fiber assembly	3/598	15/32695	0.00235	n.a.	3	1	1	1	Asap3, Fhod1, Myoc
GO:0045779	BP	e	negative regulation of bone resorption	3/598	15/32695	0.00235	n.a.	3	1	1	1	Inpp5d, Tnfrsf11b, Vegfa
GO:0006911	BP	e	phagocytosis, engulfment	4/598	31/32695	0.00236	n.a.	4	1	1	1	Aif1, Fcer1g, Itgb2, Trem2
GO:0042060	BP	e	wound healing	6/598	74/32695	0.00236	n.a.	6	1	1	1	Cav1, Eng, Lox, Plau, Ppl, Slc11a1
GO:0001568	BP	e	blood vessel development	6/598	76/32695	0.0027	n.a.	6	1	1	1	Aldh1a2, Foxc1, Lox, Sphk1, Tbx1, Vegfa
GO:0030216	BP	e	keratinocyte differentiation	6/598	76/32695	0.0027	n.a.	6	1	1	1	Anxa1, Clic4, Ptgs2, Scel, St14, Tgm1
GO:0022011	BP	e	myelination in peripheral nervous system	3/598	16/32695	0.00285	n.a.	3	1	1	1	Adgrg6, Lgi4, Myoc
GO:0010977	BP	e	negative regulation of neuron projection development	6/598	77/32695	0.00289	n.a.	6	1	1	1	Ctsz, Efemp1, Gfap, Mag, Pmp22, Vim
GO:0050830	BP	e	defense response to Gram-positive bacterium	7/598	103/32695	0.00289	n.a.	7	1	1	1	C5ar1, Hck, Lyz2, Myo1f, Pglyrp1, Ssc5d, Tlr2
GO:2001240	BP	e	negative regulation of extrinsic apoptotic signaling pathway in absence of ligand	4/598	33/32695	0.00298	n.a.	4	1	1	1	Cx3cr1, Eya2, Eya4, Pf4
GO:0042531	BP	e	positive regulation of tyrosine phosphorylation of STAT protein	5/598	54/32695	0.00304	n.a.	5	1	1	1	Csf1r, Hcls1, Il18, Tnfrsf18, Tnfrsf1a
GO:0050829	BP	e	defense response to Gram-negative bacterium	6/598	78/32695	0.00308	n.a.	6	1	1	1	Lyz2, Mr1, Pycard, Slc11a1, Ssc5d, Tlr4
GO:0048550	BP	e	negative regulation of pinocytosis	2/598	5/32695	0.00322	n.a.	2	1	1	1	Cav1, Nr1h3
GO:0034134	BP	e	toll-like receptor 2 signaling pathway	2/598	5/32695	0.00322	n.a.	2	1	1	1	Pik3ap1, Tlr2
GO:0002573	BP	e	myeloid leukocyte differentiation	2/598	5/32695	0.00322	n.a.	2	1	1	1	Hhex, Spi1
GO:0031077	BP	e	post-embryonic camera-type eye development	2/598	5/32695	0.00322	n.a.	2	1	1	1	Klf4, Vegfa
GO:0035754	BP	e	B cell chemotaxis	2/598	5/32695	0.00322	n.a.	2	1	1	1	Ch25h, Cxcl13
GO:0032732	BP	e	positive regulation of interleukin-1 production	2/598	5/32695	0.00322	n.a.	2	1	1	1	Lgals9, Tlr4
GO:0060023	BP	e	soft palate development	2/598	5/32695	0.00322	n.a.	2	1	1	1	Col11a2, Tbx1
GO:0045621	BP	e	positive regulation of lymphocyte differentiation	2/598	5/32695	0.00322	n.a.	2	1	1	1	Inpp5d, Nckap1l
GO:0002283	BP	e	neutrophil activation involved in immune response	2/598	5/32695	0.00322	n.a.	2	1	1	1	Fcer1g, Tyrobp
GO:1905007	BP	e	positive regulation of epithelial to mesenchymal transition involved in endocardial cushion formation	2/598	5/32695	0.00322	n.a.	2	1	1	1	Eng, Tgfbr2
GO:0032623	BP	e	interleukin-2 production	2/598	5/32695	0.00322	n.a.	2	1	1	1	Fcer1g, Slc11a1
GO:2001181	BP	e	positive regulation of interleukin-10 secretion	2/598	5/32695	0.00322	n.a.	2	1	1	1	Lgals9, Pycard
GO:0002322	BP	e	B cell proliferation involved in immune response	2/598	5/32695	0.00322	n.a.	2	1	1	1	Cd180, Tlr4
GO:0002138	BP	e	retinoic acid biosynthetic process	2/598	5/32695	0.00322	n.a.	2	1	1	1	Aldh1a1, Aldh1a2
GO:0034123	BP	e	positive regulation of toll-like receptor signaling pathway	2/598	5/32695	0.00322	n.a.	2	1	1	1	Pik3ap1, Tlr2
GO:0045351	BP	e	type I interferon biosynthetic process	2/598	5/32695	0.00322	n.a.	2	1	1	1	Irf7, Irf9
GO:0036003	BP	e	positive regulation of transcription from RNA polymerase II promoter in response to stress	2/598	5/32695	0.00322	n.a.	2	1	1	1	Klf2, Nfe2l2
GO:0060355	BP	e	positive regulation of cell adhesion molecule production	2/598	5/32695	0.00322	n.a.	2	1	1	1	Cav1, Colec12
GO:0010572	BP	e	positive regulation of platelet activation	2/598	5/32695	0.00322	n.a.	2	1	1	1	Plek, Tlr4
GO:0030072	BP	e	peptide hormone secretion	2/598	5/32695	0.00322	n.a.	2	1	1	1	Edn1, Edn3
GO:1902714	BP	e	negative regulation of interferon-gamma secretion	2/598	5/32695	0.00322	n.a.	2	1	1	1	Lgals9, Zc3h12a
GO:0010893	BP	e	positive regulation of steroid biosynthetic process	2/598	5/32695	0.00322	n.a.	2	1	1	1	Cga, Il1a
GO:0033031	BP	e	positive regulation of neutrophil apoptotic process	2/598	5/32695	0.00322	n.a.	2	1	1	1	Anxa1, Cd44
GO:0032020	BP	e	ISG15-protein conjugation	2/598	5/32695	0.00322	n.a.	2	1	1	1	Isg15, Ube2l6
GO:0045637	BP	e	regulation of myeloid cell differentiation	2/598	5/32695	0.00322	n.a.	2	1	1	1	Csf3r, Tal1
GO:0051260	BP	e	protein homooligomerization	11/598	227/32695	0.00327	n.a.	11	1	1	1	Anxa5, Cav1, Cdh1, Cryab, Ehd4, Fcer1g, Itpr3, P2rx4, Rnf213, Slc22a6, Stom
GO:0043087	BP	e	regulation of GTPase activity	6/598	79/32695	0.00328	n.a.	6	1	1	1	Plxnb3, Pycard, Rasa4, Rasal3, Rasgrp3, Vav1
GO:0007519	BP	e	skeletal muscle tissue development	5/598	55/32695	0.0033	n.a.	5	1	1	1	Cav1, Flnb, Hlx, Srpk3, Vamp5
GO:0006958	BP	e	complement activation, classical pathway	4/598	34/32695	0.00333	n.a.	4	1	1	1	C1qa, C1qb, C1qc, C2
GO:0044344	BP	e	cellular response to fibroblast growth factor stimulus	3/598	17/32695	0.00342	n.a.	3	1	1	1	Cd44, Tbx1, Zfp36l2
GO:0014002	BP	e	astrocyte development	3/598	17/32695	0.00342	n.a.	3	1	1	1	Gfap, Tlr4, Vim
GO:0031643	BP	e	positive regulation of myelination	3/598	17/32695	0.00342	n.a.	3	1	1	1	Mag, S100b, Trf
GO:0050732	BP	e	negative regulation of peptidyl-tyrosine phosphorylation	3/598	17/32695	0.00342	n.a.	3	1	1	1	Il18, Ptprc, Samsn1
GO:0034122	BP	e	negative regulation of toll-like receptor signaling pathway	3/598	17/32695	0.00342	n.a.	3	1	1	1	Irak3, Pik3ap1, Smpdl3b
GO:2000737	BP	e	negative regulation of stem cell differentiation	3/598	17/32695	0.00342	n.a.	3	1	1	1	Jag1, Stat3, Zfp36l2
GO:0002042	BP	e	cell migration involved in sprouting angiogenesis	3/598	17/32695	0.00342	n.a.	3	1	1	1	Clec14a, Kdr, Vegfa
GO:0032270	BP	e	positive regulation of cellular protein metabolic process	3/598	17/32695	0.00342	n.a.	3	1	1	1	Csf1, Klf4, Nr1h3
GO:0030097	BP	e	hemopoiesis	6/598	80/32695	0.0035	n.a.	6	1	1	1	Csf1r, Hhex, Kdr, Runx1, Tal1, Zfp36l2
GO:0050731	BP	e	positive regulation of peptidyl-tyrosine phosphorylation	7/598	108/32695	0.00376	n.a.	7	1	1	1	Cd44, Ehd4, Hcls1, Tlr4, Trem2, Vegfa, Vtn
GO:0045785	BP	e	positive regulation of cell adhesion	5/598	57/32695	0.00385	n.a.	5	1	1	1	Apbb1ip, Cxcl12, Tnfrsf18, Vav1, Vegfa
GO:0006898	BP	e	receptor-mediated endocytosis	5/598	57/32695	0.00385	n.a.	5	1	1	1	Cd14, Micall1, Mrc1, Snx9, Tgfbr2
GO:0010759	BP	e	positive regulation of macrophage chemotaxis	3/598	18/32695	0.00405	n.a.	3	1	1	1	C3ar1, C5ar1, Csf1
GO:0034113	BP	e	heterotypic cell-cell adhesion	3/598	18/32695	0.00405	n.a.	3	1	1	1	Itgax, Itgb2, Ptprc
GO:0003203	BP	e	endocardial cushion morphogenesis	3/598	18/32695	0.00405	n.a.	3	1	1	1	Acvrl1, Eng, Nos3
GO:0060216	BP	e	definitive hemopoiesis	3/598	18/32695	0.00405	n.a.	3	1	1	1	Runx1, Tal1, Zfp36l2
GO:0031954	BP	e	positive regulation of protein autophosphorylation	3/598	18/32695	0.00405	n.a.	3	1	1	1	Gpnmb, Rassf2, Vegfa
GO:0048754	BP	e	branching morphogenesis of an epithelial tube	4/598	36/32695	0.0041	n.a.	4	1	1	1	Clic4, Kdr, Mgp, Vegfa
GO:0098609	BP	e	cell-cell adhesion	7/598	110/32695	0.00416	n.a.	7	1	1	1	Cdc42ep1, Cdh1, Cxcl12, Fblim1, Itgam, Itgb2, Plxnb3
GO:0001558	BP	e	regulation of cell growth	5/598	59/32695	0.00447	n.a.	5	1	1	1	Cd44, Htra3, Igfbp6, Kazald1, Wisp1
GO:0042493	BP	e	response to drug	8/598	141/32695	0.00453	n.a.	8	1	1	1	Aldh1a1, Apobec1, Crot, Cybb, Kdr, Lcn2, Nckap1l, Tgfbr2
GO:0030513	BP	e	positive regulation of BMP signaling pathway	4/598	37/32695	0.00454	n.a.	4	1	1	1	Acvrl1, Eng, Foxd1, Kdr
GO:0009725	BP	e	response to hormone	4/598	37/32695	0.00454	n.a.	4	1	1	1	Ang, Hcls1, Lox, Nos3
GO:0097009	BP	e	energy homeostasis	4/598	37/32695	0.00454	n.a.	4	1	1	1	Ampd3, Mlxipl, Oma1, Stat3
GO:0051770	BP	e	positive regulation of nitric-oxide synthase biosynthetic process	3/598	19/32695	0.00474	n.a.	3	1	1	1	Kdr, Tlr2, Tlr4
GO:0090026	BP	e	positive regulation of monocyte chemotaxis	3/598	19/32695	0.00474	n.a.	3	1	1	1	Aif1, Cxcl10, Cxcl12
GO:0061419	BP	e	positive regulation of transcription from RNA polymerase II promoter in response to hypoxia	2/598	6/32695	0.00477	n.a.	2	1	1	1	Nfe2l2, Vegfa
GO:0050819	BP	e	negative regulation of coagulation	2/598	6/32695	0.00477	n.a.	2	1	1	1	Anxa5, Pros1
GO:0009168	BP	e	purine ribonucleoside monophosphate biosynthetic process	2/598	6/32695	0.00477	n.a.	2	1	1	1	Adssl1, Ampd3
GO:0070723	BP	e	response to cholesterol	2/598	6/32695	0.00477	n.a.	2	1	1	1	Ccr5, Tgfbr2
GO:0006531	BP	e	aspartate metabolic process	2/598	6/32695	0.00477	n.a.	2	1	1	1	Adssl1, Ddo
GO:0043615	BP	e	astrocyte cell migration	2/598	6/32695	0.00477	n.a.	2	1	1	1	Ccl3, Hexb
GO:0071224	BP	e	cellular response to peptidoglycan	2/598	6/32695	0.00477	n.a.	2	1	1	1	Tlr2, Trem2
GO:0016576	BP	e	histone dephosphorylation	2/598	6/32695	0.00477	n.a.	2	1	1	1	Eya2, Eya4
GO:0043372	BP	e	positive regulation of CD4-positive, alpha-beta T cell differentiation	2/598	6/32695	0.00477	n.a.	2	1	1	1	Cd83, Nckap1l
GO:0033625	BP	e	positive regulation of integrin activation	2/598	6/32695	0.00477	n.a.	2	1	1	1	Cxcl13, Plek
GO:0038033	BP	e	positive regulation of endothelial cell chemotaxis by VEGF-activated vascular endothelial growth factor receptor signaling pathway	2/598	6/32695	0.00477	n.a.	2	1	1	1	Kdr, Vegfa
GO:1904798	BP	e	positive regulation of core promoter binding	2/598	6/32695	0.00477	n.a.	2	1	1	1	Foxc1, Klf4
GO:0045629	BP	e	negative regulation of T-helper 2 cell differentiation	2/598	6/32695	0.00477	n.a.	2	1	1	1	Anxa1, Hlx
GO:0003416	BP	e	endochondral bone growth	2/598	6/32695	0.00477	n.a.	2	1	1	1	Evc, Kdr
GO:0060708	BP	e	spongiotrophoblast differentiation	2/598	6/32695	0.00477	n.a.	2	1	1	1	Socs3, Xist
GO:0001936	BP	e	regulation of endothelial cell proliferation	2/598	6/32695	0.00477	n.a.	2	1	1	1	Aldh1a2, Kdr
GO:0034162	BP	e	toll-like receptor 9 signaling pathway	2/598	6/32695	0.00477	n.a.	2	1	1	1	Pik3ap1, Unc93b1
GO:0031394	BP	e	positive regulation of prostaglandin biosynthetic process	2/598	6/32695	0.00477	n.a.	2	1	1	1	Anxa1, Ptgs2
GO:1900426	BP	e	positive regulation of defense response to bacterium	2/598	6/32695	0.00477	n.a.	2	1	1	1	Cyba, Lgals9
GO:0032400	BP	e	melanosome localization	2/598	6/32695	0.00477	n.a.	2	1	1	1	Mlph, Vps33b
GO:0042270	BP	e	protection from natural killer cell mediated cytotoxicity	2/598	6/32695	0.00477	n.a.	2	1	1	1	Clec2d, Serpinb9
GO:0006527	BP	e	arginine catabolic process	2/598	6/32695	0.00477	n.a.	2	1	1	1	Fah, Nos3
GO:0045588	BP	e	positive regulation of gamma-delta T cell differentiation	2/598	6/32695	0.00477	n.a.	2	1	1	1	Nckap1l, Ptprc
GO:0034097	BP	e	response to cytokine	5/598	60/32695	0.00481	n.a.	5	1	1	1	Aldh1a2, Osmr, Ptgs2, Serpina3n, Stat3
GO:0007517	BP	e	muscle organ development	5/598	60/32695	0.00481	n.a.	5	1	1	1	Cryab, Srpk3, Tbx1, Vamp5, Zbtb42
GO:0007605	BP	e	sensory perception of sound	11/598	240/32695	0.00496	n.a.	11	1	1	1	Cdh1, Col11a2, Dcdc2a, Eya4, Gjb2, Hexa, Hexb, Mbp, Mir124a-1hg, Tbx1, Tbx18
GO:0006641	BP	e	triglyceride metabolic process	4/598	38/32695	0.005	n.a.	4	1	1	1	Apobec1, Apobr, Cav1, Cyp2e1
GO:0051603	BP	e	proteolysis involved in cellular protein catabolic process	5/598	61/32695	0.00516	n.a.	5	1	1	1	Casp8, Ctsh, Ctsk, Ctss, Ctsz
GO:0006006	BP	e	glucose metabolic process	5/598	61/32695	0.00516	n.a.	5	1	1	1	Apod, Cbr2, Dcxr, Hk2, Oma1
GO:1901223	BP	e	negative regulation of NIK/NF-kappaB signaling	3/598	20/32695	0.0055	n.a.	3	1	1	1	Litaf, Rassf2, Zc3h12a
GO:0006801	BP	e	superoxide metabolic process	3/598	20/32695	0.0055	n.a.	3	1	1	1	Cyba, Cybb, Ncf2
GO:0001913	BP	e	T cell mediated cytotoxicity	3/598	20/32695	0.0055	n.a.	3	1	1	1	Ctsh, Hfe, Serpinb9
GO:0032874	BP	e	positive regulation of stress-activated MAPK cascade	3/598	20/32695	0.0055	n.a.	3	1	1	1	Eif2ak2, Il1a, Tlr4
GO:0061025	BP	e	membrane fusion	3/598	20/32695	0.0055	n.a.	3	1	1	1	Mx1, Mx2, Vps33b
GO:0048010	BP	e	vascular endothelial growth factor receptor signaling pathway	3/598	20/32695	0.0055	n.a.	3	1	1	1	Foxc1, Kdr, Vegfa
GO:0050727	BP	e	regulation of inflammatory response	5/598	62/32695	0.00553	n.a.	5	1	1	1	Anxa1, Pik3ap1, Pycard, Tlr4, Usp18
GO:0001934	BP	e	positive regulation of protein phosphorylation	10/598	210/32695	0.00556	n.a.	10	1	1	1	Aif1, Anxa2, Csf1r, Eng, Gpnmb, Kdr, Prr5l, Sphk1, Tbx1, Vegfa
GO:0045893	BP	e	positive regulation of transcription, DNA-templated	21/598	613/32695	0.00577	n.a.	21	1	1	1	Acvrl1, Atoh8, Cdh1, Fam129b, Foxc1, Irf7, Irf8, Klf2, Klf4, Mlxipl, Nfe2l2, Nr1h3, Pou2f2, Runx1, Spi1, Spp1, Stat3, Tal1, Tbx1, Trf, Zic1
GO:0001701	BP	e	in utero embryonic development	12/598	280/32695	0.0058	n.a.	12	1	1	1	Acvrl1, Cdh1, Edn1, Foxc1, Hba-a2, Hhex, Klf2, Maff, Nos3, Runx1, Tgfbr2, Vegfa
GO:0016042	BP	e	lipid catabolic process	7/598	117/32695	0.00582	n.a.	7	1	1	1	Aspg, Enpp6, Plce1, Plcg2, Pld4, Pnpla7, Smpdl3b
GO:0014911	BP	e	positive regulation of smooth muscle cell migration	4/598	40/32695	0.00601	n.a.	4	1	1	1	Il18, P2ry6, Plau, Vtn
GO:0061844	BP	e	antimicrobial humoral immune response mediated by antimicrobial peptide	5/598	64/32695	0.00632	n.a.	5	1	1	1	Cxcl10, Cxcl13, Cxcl5, Pf4, Pglyrp1
GO:0042102	BP	e	positive regulation of T cell proliferation	5/598	64/32695	0.00632	n.a.	5	1	1	1	Aif1, Anxa1, Cd86, Nckap1l, Ptprc
GO:0030101	BP	e	natural killer cell activation	3/598	21/32695	0.00634	n.a.	3	1	1	1	Hfe, Il18, Itgb2
GO:0045954	BP	e	positive regulation of natural killer cell mediated cytotoxicity	3/598	21/32695	0.00634	n.a.	3	1	1	1	H2-M3, Lag3, Vav1
GO:0048255	BP	e	mRNA stabilization	3/598	21/32695	0.00634	n.a.	3	1	1	1	Apobec1, Slc11a1, Vegfa
GO:0045987	BP	e	positive regulation of smooth muscle contraction	3/598	21/32695	0.00634	n.a.	3	1	1	1	Edn1, Ptgs2, Sphk1
GO:0010596	BP	e	negative regulation of endothelial cell migration	3/598	21/32695	0.00634	n.a.	3	1	1	1	Acvrl1, Dcn, Serpinf1
GO:0030278	BP	e	regulation of ossification	3/598	21/32695	0.00634	n.a.	3	1	1	1	Csf1, Prl, Rsad2
GO:0010976	BP	e	positive regulation of neuron projection development	8/598	150/32695	0.00654	n.a.	8	1	1	1	Adamts1, Cxcl5, Fes, Grn, Nfe2l2, Plxnb3, Serpinf1, Sphk1
GO:0030854	BP	e	positive regulation of granulocyte differentiation	2/598	7/32695	0.0066	n.a.	2	1	1	1	Hcls1, Runx1
GO:0050665	BP	e	hydrogen peroxide biosynthetic process	2/598	7/32695	0.0066	n.a.	2	1	1	1	Cyba, Cybb
GO:0048285	BP	e	organelle fission	2/598	7/32695	0.0066	n.a.	2	1	1	1	Mx1, Mx2
GO:0070542	BP	e	response to fatty acid	2/598	7/32695	0.0066	n.a.	2	1	1	1	Tlr2, Tlr4
GO:0006689	BP	e	ganglioside catabolic process	2/598	7/32695	0.0066	n.a.	2	1	1	1	Hexa, Hexb
GO:2000562	BP	e	negative regulation of CD4-positive, alpha-beta T cell proliferation	2/598	7/32695	0.0066	n.a.	2	1	1	1	Cd44, Lgals9
GO:0006559	BP	e	L-phenylalanine catabolic process	2/598	7/32695	0.0066	n.a.	2	1	1	1	Fah, Qdpr
GO:0010803	BP	e	regulation of tumor necrosis factor-mediated signaling pathway	2/598	7/32695	0.0066	n.a.	2	1	1	1	Pycard, Sphk1
GO:0031622	BP	e	positive regulation of fever generation	2/598	7/32695	0.0066	n.a.	2	1	1	1	Ccr5, Ptgs2
GO:0042904	BP	e	9-cis-retinoic acid biosynthetic process	2/598	7/32695	0.0066	n.a.	2	1	1	1	Aldh1a1, Aldh1a2
GO:0042118	BP	e	endothelial cell activation	2/598	7/32695	0.0066	n.a.	2	1	1	1	Acvrl1, Cxcl10
GO:0071281	BP	e	cellular response to iron ion	2/598	7/32695	0.0066	n.a.	2	1	1	1	Hfe, Trf
GO:1902966	BP	e	positive regulation of protein localization to early endosome	2/598	7/32695	0.0066	n.a.	2	1	1	1	Msn, Vegfa
GO:0032480	BP	e	negative regulation of type I interferon production	2/598	7/32695	0.0066	n.a.	2	1	1	1	Dhx58, Nmi
GO:0050869	BP	e	negative regulation of B cell activation	2/598	7/32695	0.0066	n.a.	2	1	1	1	Inpp5d, Samsn1
GO:0010870	BP	e	positive regulation of receptor biosynthetic process	2/598	7/32695	0.0066	n.a.	2	1	1	1	Edn1, Nr1h3
GO:0045359	BP	e	positive regulation of interferon-beta biosynthetic process	2/598	7/32695	0.0066	n.a.	2	1	1	1	Tlr4, Tlr7
GO:0006739	BP	e	NADP metabolic process	2/598	7/32695	0.0066	n.a.	2	1	1	1	Dcxr, Fmo2
GO:0048842	BP	e	positive regulation of axon extension involved in axon guidance	2/598	7/32695	0.0066	n.a.	2	1	1	1	Cxcl12, Vegfa
GO:2000273	BP	e	positive regulation of signaling receptor activity	2/598	7/32695	0.0066	n.a.	2	1	1	1	Hfe, Tal1
GO:1900246	BP	e	positive regulation of RIG-I signaling pathway	2/598	7/32695	0.0066	n.a.	2	1	1	1	Dhx58, Zc3hav1
GO:0002819	BP	e	regulation of adaptive immune response	2/598	7/32695	0.0066	n.a.	2	1	1	1	Cd48, Irf7
GO:0002438	BP	e	acute inflammatory response to antigenic stimulus	2/598	7/32695	0.0066	n.a.	2	1	1	1	Bdkrb2, Serpinb9
GO:0045630	BP	e	positive regulation of T-helper 2 cell differentiation	2/598	7/32695	0.0066	n.a.	2	1	1	1	Il18, Il4ra
GO:0007507	BP	e	heart development	11/598	250/32695	0.00668	n.a.	11	1	1	1	Adap2, Aldh1a2, Bicc1, Casp8, Edn1, Eng, Foxc1, Lox, Osr1, Tbx1, Tgfbr2
GO:0043154	BP	e	negative regulation of cysteine-type endopeptidase activity involved in apoptotic process	5/598	66/32695	0.00719	n.a.	5	1	1	1	Cd44, Cryab, Klf4, Ptgs2, Vegfa
GO:0050850	BP	e	positive regulation of calcium-mediated signaling	3/598	22/32695	0.00724	n.a.	3	1	1	1	Kdr, P2rx4, Trem2
GO:0033627	BP	e	cell adhesion mediated by integrin	3/598	22/32695	0.00724	n.a.	3	1	1	1	Itgb2, Itgb5, Vtn
GO:0050966	BP	e	detection of mechanical stimulus involved in sensory perception of pain	3/598	22/32695	0.00724	n.a.	3	1	1	1	Cxcl12, Il18, Tlr4
GO:0014032	BP	e	neural crest cell development	3/598	22/32695	0.00724	n.a.	3	1	1	1	Aldh1a2, Edn1, Foxc1
GO:0022409	BP	e	positive regulation of cell-cell adhesion	3/598	22/32695	0.00724	n.a.	3	1	1	1	Ccr5, Cdh1, Tbx18
GO:0002028	BP	e	regulation of sodium ion transport	3/598	22/32695	0.00724	n.a.	3	1	1	1	Dmpk, Nos3, P2rx4
GO:0030574	BP	e	collagen catabolic process	3/598	22/32695	0.00724	n.a.	3	1	1	1	Ctsk, Ctss, Mrc2
GO:0006164	BP	e	purine nucleotide biosynthetic process	3/598	22/32695	0.00724	n.a.	3	1	1	1	Adssl1, Nt5e, Oasl2
GO:0051482	BP	e	positive regulation of cytosolic calcium ion concentration involved in phospholipase C-activating G-protein coupled signaling pathway	4/598	43/32695	0.00778	n.a.	4	1	1	1	C3ar1, Edn1, Gna15, Gpr4
GO:0018108	BP	e	peptidyl-tyrosine phosphorylation	5/598	68/32695	0.00815	n.a.	5	1	1	1	Csf1r, Efemp1, Fes, Hck, Kdr
GO:0048260	BP	e	positive regulation of receptor-mediated endocytosis	3/598	23/32695	0.00821	n.a.	3	1	1	1	Hfe, Trf, Vtn
GO:0051930	BP	e	regulation of sensory perception of pain	4/598	44/32695	0.00843	n.a.	4	1	1	1	Ctss, Edn1, Il1a, Tlr4
GO:0030968	BP	e	endoplasmic reticulum unfolded protein response	4/598	44/32695	0.00843	n.a.	4	1	1	1	Atf3, Cdk5rap3, Eif2ak2, Nfe2l2
GO:0060907	BP	e	positive regulation of macrophage cytokine production	2/598	8/32695	0.00869	n.a.	2	1	1	1	Tlr2, Tlr4
GO:0035148	BP	e	tube formation	2/598	8/32695	0.00869	n.a.	2	1	1	1	Atoh8, Vegfa
GO:0031666	BP	e	positive regulation of lipopolysaccharide-mediated signaling pathway	2/598	8/32695	0.00869	n.a.	2	1	1	1	Cd180, Ly86
GO:0002821	BP	e	positive regulation of adaptive immune response	2/598	8/32695	0.00869	n.a.	2	1	1	1	Cd44, Pycard
GO:0042116	BP	e	macrophage activation	2/598	8/32695	0.00869	n.a.	2	1	1	1	Slc11a1, Tlr4
GO:0032488	BP	e	Cdc42 protein signal transduction	2/598	8/32695	0.00869	n.a.	2	1	1	1	Rhoj, Shtn1
GO:0045627	BP	e	positive regulation of T-helper 1 cell differentiation	2/598	8/32695	0.00869	n.a.	2	1	1	1	Anxa1, Hlx
GO:0045602	BP	e	negative regulation of endothelial cell differentiation	2/598	8/32695	0.00869	n.a.	2	1	1	1	Acvrl1, Jag1
GO:0042088	BP	e	T-helper 1 type immune response	2/598	8/32695	0.00869	n.a.	2	1	1	1	Il18, Vegfa
GO:0006691	BP	e	leukotriene metabolic process	2/598	8/32695	0.00869	n.a.	2	1	1	1	Tlr2, Tlr4
GO:0061299	BP	e	retina vasculature morphogenesis in camera-type eye	2/598	8/32695	0.00869	n.a.	2	1	1	1	Clic4, Rhoj
GO:0031346	BP	e	positive regulation of cell projection organization	2/598	8/32695	0.00869	n.a.	2	1	1	1	Efemp1, Lcn2
GO:0071394	BP	e	cellular response to testosterone stimulus	2/598	8/32695	0.00869	n.a.	2	1	1	1	Msn, Spp1
GO:0072540	BP	e	T-helper 17 cell lineage commitment	2/598	8/32695	0.00869	n.a.	2	1	1	1	Ly9, Stat3
GO:0050702	BP	e	interleukin-1 beta secretion	2/598	8/32695	0.00869	n.a.	2	1	1	1	Aim2, Tlr4
GO:0043304	BP	e	regulation of mast cell degranulation	2/598	8/32695	0.00869	n.a.	2	1	1	1	Fes, Stxbp2
GO:0035912	BP	e	dorsal aorta morphogenesis	2/598	8/32695	0.00869	n.a.	2	1	1	1	Acvrl1, Eng
GO:0032611	BP	e	interleukin-1 beta production	2/598	8/32695	0.00869	n.a.	2	1	1	1	Mr1, Pycard
GO:0048016	BP	e	inositol phosphate-mediated signaling	2/598	8/32695	0.00869	n.a.	2	1	1	1	Edn1, Edn3
GO:0071356	BP	e	cellular response to tumor necrosis factor	6/598	97/32695	0.00888	n.a.	6	1	1	1	Ccl3, Ccl6, Nfe2l2, Pycard, Zc3h12a, Zfp36l2
GO:0032720	BP	e	negative regulation of tumor necrosis factor production	4/598	45/32695	0.00913	n.a.	4	1	1	1	Gpnmb, Irak3, Tlr4, Zc3h12a
GO:0097190	BP	e	apoptotic signaling pathway	4/598	45/32695	0.00913	n.a.	4	1	1	1	Casp8, Cav1, Dap, P2rx4
GO:0051894	BP	e	positive regulation of focal adhesion assembly	3/598	24/32695	0.00926	n.a.	3	1	1	1	Kdr, Myoc, Vegfa
GO:0001570	BP	e	vasculogenesis	5/598	71/32695	0.00973	n.a.	5	1	1	1	Cav1, Eng, Hhex, Kdr, Tgfbr2
GO:0032781	BP	e	positive regulation of ATPase activity	3/598	25/32695	0.0104	n.a.	3	1	1	1	Atp1b3, Dnajc24, Zc3hav1
GO:0045471	BP	e	response to ethanol	4/598	47/32695	0.0106	n.a.	4	1	1	1	Aldh1a1, Apobec1, Casp8, Tlr4
GO:0000122	BP	e	negative regulation of transcription by RNA polymerase II	25/598	807/32695	0.0108	n.a.	25	1	1	1	Atf3, Bhlhe41, Btg2, Cav1, E4f1, Edn1, Eng, Foxc1, Hcls1, Hhex, Irf8, Klf2, Klf4, Mlxipl, Nr1h3, Osr1, Rreb1, Runx1, Spi1, Tal1, Tbx1, Tbx18, Tfcp2l1, Vegfa, Zbtb42
GO:0043525	BP	e	positive regulation of neuron apoptotic process	5/598	73/32695	0.0109	n.a.	5	1	1	1	Ccl3, Ctsz, Il18, Ncf2, Tnfrsf1a
GO:0070373	BP	e	negative regulation of ERK1 and ERK2 cascade	5/598	73/32695	0.0109	n.a.	5	1	1	1	Atf3, Cav1, Fbln1, Klf4, Tlr4
GO:1900165	BP	e	negative regulation of interleukin-6 secretion	2/598	9/32695	0.011	n.a.	2	1	1	1	Cd84, Zc3h12a
GO:2001056	BP	e	positive regulation of cysteine-type endopeptidase activity	2/598	9/32695	0.011	n.a.	2	1	1	1	Aim2, Pycard
GO:0032308	BP	e	positive regulation of prostaglandin secretion	2/598	9/32695	0.011	n.a.	2	1	1	1	Edn1, Il1a
GO:0015816	BP	e	glycine transport	2/598	9/32695	0.011	n.a.	2	1	1	1	Slc38a5, Slc6a20a
GO:0008354	BP	e	germ cell migration	2/598	9/32695	0.011	n.a.	2	1	1	1	Cxcl12, Foxc1
GO:0071901	BP	e	negative regulation of protein serine/threonine kinase activity	2/598	9/32695	0.011	n.a.	2	1	1	1	Cdk5rap3, Pycard
GO:0033622	BP	e	integrin activation	2/598	9/32695	0.011	n.a.	2	1	1	1	Cxcl12, Fermt3
GO:0010447	BP	e	response to acidic pH	2/598	9/32695	0.011	n.a.	2	1	1	1	Ctss, Gpr4
GO:0045416	BP	e	positive regulation of interleukin-8 biosynthetic process	2/598	9/32695	0.011	n.a.	2	1	1	1	Tlr4, Tlr7
GO:0019941	BP	e	modification-dependent protein catabolic process	2/598	9/32695	0.011	n.a.	2	1	1	1	Isg15, Ube2l6
GO:2000008	BP	e	regulation of protein localization to cell surface	2/598	9/32695	0.011	n.a.	2	1	1	1	Cdh1, Hfe
GO:0031340	BP	e	positive regulation of vesicle fusion	2/598	9/32695	0.011	n.a.	2	1	1	1	Anxa1, Anxa2
GO:0009404	BP	e	toxin metabolic process	2/598	9/32695	0.011	n.a.	2	1	1	1	As3mt, Fmo2
GO:2000145	BP	e	regulation of cell motility	2/598	9/32695	0.011	n.a.	2	1	1	1	Arhgap18, Fes
GO:0072659	BP	e	protein localization to plasma membrane	7/598	133/32695	0.0114	n.a.	7	1	1	1	Anxa2, Atp1b3, Cdh1, Fcer1g, Fyb, Myl12a, Tnfrsf1a
GO:0010862	BP	e	positive regulation of pathway-restricted SMAD protein phosphorylation	4/598	48/32695	0.0114	n.a.	4	1	1	1	Acvrl1, Eng, Hfe, Lgals9
GO:0010811	BP	e	positive regulation of cell-substrate adhesion	4/598	48/32695	0.0114	n.a.	4	1	1	1	Dmp1, Smoc1, Spp1, Vtn
GO:0030878	BP	e	thyroid gland development	3/598	26/32695	0.0116	n.a.	3	1	1	1	Cga, Hhex, Tbx1
GO:0019915	BP	e	lipid storage	3/598	26/32695	0.0116	n.a.	3	1	1	1	Cav1, Hexa, Hexb
GO:0043542	BP	e	endothelial cell migration	3/598	26/32695	0.0116	n.a.	3	1	1	1	Itgb2, Nos3, Vegfa
GO:0035924	BP	e	cellular response to vascular endothelial growth factor stimulus	3/598	26/32695	0.0116	n.a.	3	1	1	1	Anxa1, Kdr, Vegfa
GO:0042104	BP	e	positive regulation of activated T cell proliferation	3/598	26/32695	0.0116	n.a.	3	1	1	1	Cd86, Il18, Pycard
GO:0000902	BP	e	cell morphogenesis	6/598	104/32695	0.0123	n.a.	6	1	1	1	Cdh1, Cdh19, Klf2, Nckap1l, Tfcp2l1, Unc93b1
GO:0019722	BP	e	calcium-mediated signaling	5/598	76/32695	0.0128	n.a.	5	1	1	1	Ccr5, Cx3cr1, Edn1, Lat2, Sphk1
GO:0030517	BP	e	negative regulation of axon extension	3/598	27/32695	0.0129	n.a.	3	1	1	1	Arhgap4, Ccr5, Mag
GO:0032870	BP	e	cellular response to hormone stimulus	3/598	27/32695	0.0129	n.a.	3	1	1	1	Cga, Ncf2, Stat3
GO:0071347	BP	e	cellular response to interleukin-1	4/598	50/32695	0.0131	n.a.	4	1	1	1	Ccl3, Ccl6, Pycard, Zc3h12a
GO:0051592	BP	e	response to calcium ion	4/598	50/32695	0.0131	n.a.	4	1	1	1	Anxa5, Apobec1, Cav1, Itpr3
GO:0009968	BP	e	negative regulation of signal transduction	6/598	106/32695	0.0134	n.a.	6	1	1	1	Cav1, Csf1r, Inpp5d, Kdr, Prr5l, Socs3
GO:0007266	BP	e	Rho protein signal transduction	5/598	77/32695	0.0135	n.a.	5	1	1	1	Cdc42ep1, Cdc42ep2, Cdc42ep5, Ctnnal1, Rhoj
GO:0031529	BP	e	ruffle organization	2/598	10/32695	0.0136	n.a.	2	1	1	1	Csf1r, Plek
GO:0001771	BP	e	immunological synapse formation	2/598	10/32695	0.0136	n.a.	2	1	1	1	Dock8, Msn
GO:0071639	BP	e	positive regulation of monocyte chemotactic protein-1 production	2/598	10/32695	0.0136	n.a.	2	1	1	1	Cd84, Il1a
GO:0034115	BP	e	negative regulation of heterotypic cell-cell adhesion	2/598	10/32695	0.0136	n.a.	2	1	1	1	Klf4, Mbp
GO:0006880	BP	e	intracellular sequestering of iron ion	2/598	10/32695	0.0136	n.a.	2	1	1	1	Fth1, Ftl1
GO:0060020	BP	e	Bergmann glial cell differentiation	2/598	10/32695	0.0136	n.a.	2	1	1	1	Gfap, Vim
GO:0006809	BP	e	nitric oxide biosynthetic process	2/598	10/32695	0.0136	n.a.	2	1	1	1	Nos3, P2rx4
GO:0042119	BP	e	neutrophil activation	2/598	10/32695	0.0136	n.a.	2	1	1	1	Cxcl5, Il18
GO:0045591	BP	e	positive regulation of regulatory T cell differentiation	2/598	10/32695	0.0136	n.a.	2	1	1	1	H2-M3, Lgals9
GO:0051247	BP	e	positive regulation of protein metabolic process	2/598	10/32695	0.0136	n.a.	2	1	1	1	Klf2, Klf4
GO:0061099	BP	e	negative regulation of protein tyrosine kinase activity	2/598	10/32695	0.0136	n.a.	2	1	1	1	Cav1, Mvp
GO:0045646	BP	e	regulation of erythrocyte differentiation	2/598	10/32695	0.0136	n.a.	2	1	1	1	Hbb-b2, Spi1
GO:0038084	BP	e	vascular endothelial growth factor signaling pathway	2/598	10/32695	0.0136	n.a.	2	1	1	1	Foxc1, Vegfa
GO:1900016	BP	e	negative regulation of cytokine production involved in inflammatory response	2/598	10/32695	0.0136	n.a.	2	1	1	1	Apod, Zc3h12a
GO:0008406	BP	e	gonad development	2/598	10/32695	0.0136	n.a.	2	1	1	1	Cga, Osr1
GO:0002639	BP	e	positive regulation of immunoglobulin production	2/598	10/32695	0.0136	n.a.	2	1	1	1	Cd37, Il4ra
GO:0050707	BP	e	regulation of cytokine secretion	2/598	10/32695	0.0136	n.a.	2	1	1	1	Tlr2, Tlr4
GO:0001542	BP	e	ovulation from ovarian follicle	2/598	10/32695	0.0136	n.a.	2	1	1	1	Adamts1, Nos3
GO:0060982	BP	e	coronary artery morphogenesis	2/598	10/32695	0.0136	n.a.	2	1	1	1	Tbx1, Vegfa
GO:0061614	BP	e	pri-miRNA transcription by RNA polymerase II	2/598	10/32695	0.0136	n.a.	2	1	1	1	Klf4, Spi1
GO:0051001	BP	e	negative regulation of nitric-oxide synthase activity	2/598	10/32695	0.0136	n.a.	2	1	1	1	Cav1, Eng
GO:0007200	BP	e	phospholipase C-activating G-protein coupled receptor signaling pathway	4/598	51/32695	0.0141	n.a.	4	1	1	1	C3ar1, C5ar1, Gna15, Plce1
GO:0007566	BP	e	embryo implantation	4/598	51/32695	0.0141	n.a.	4	1	1	1	Cdh1, Grn, Ptgs2, Reck
GO:0045599	BP	e	negative regulation of fat cell differentiation	4/598	51/32695	0.0141	n.a.	4	1	1	1	Dlk1, Jag1, Vegfa, Zfp36l2
GO:0030001	BP	e	metal ion transport	3/598	28/32695	0.0142	n.a.	3	1	1	1	Atp1b3, Slc11a1, Slc39a8
GO:0033209	BP	e	tumor necrosis factor-mediated signaling pathway	3/598	28/32695	0.0142	n.a.	3	1	1	1	Aim2, Pycard, Tnfrsf1a
GO:0001822	BP	e	kidney development	6/598	108/32695	0.0146	n.a.	6	1	1	1	Adamts1, Anxa4, Foxc1, Foxd1, Tns2, Vegfa
GO:0050770	BP	e	regulation of axonogenesis	3/598	29/32695	0.0156	n.a.	3	1	1	1	Kif13b, Ssh3, Vim
GO:0002548	BP	e	monocyte chemotaxis	3/598	29/32695	0.0156	n.a.	3	1	1	1	Anxa1, Ccl3, Ccl6
GO:0045807	BP	e	positive regulation of endocytosis	3/598	29/32695	0.0156	n.a.	3	1	1	1	Cav1, Cd14, Cd151
GO:0071407	BP	e	cellular response to organic cyclic compound	4/598	53/32695	0.016	n.a.	4	1	1	1	Il18, P2ry6, Stat3, Tmem173
GO:0035725	BP	e	sodium ion transmembrane transport	4/598	53/32695	0.016	n.a.	4	1	1	1	Scn7a, Slc6a12, Slc6a13, Slc6a20a
GO:0000289	BP	e	nuclear-transcribed mRNA poly(A) tail shortening	2/598	11/32695	0.0165	n.a.	2	1	1	1	Mlh1, Pan2
GO:0010656	BP	e	negative regulation of muscle cell apoptotic process	2/598	11/32695	0.0165	n.a.	2	1	1	1	Cav1, Zc3h12a
GO:0002281	BP	e	macrophage activation involved in immune response	2/598	11/32695	0.0165	n.a.	2	1	1	1	Il33, Tyrobp
GO:0060586	BP	e	multicellular organismal iron ion homeostasis	2/598	11/32695	0.0165	n.a.	2	1	1	1	Hfe, Slc11a1
GO:0032060	BP	e	bleb assembly	2/598	11/32695	0.0165	n.a.	2	1	1	1	Emp1, Pmp22
GO:0046785	BP	e	microtubule polymerization	2/598	11/32695	0.0165	n.a.	2	1	1	1	Cav1, Tppp3
GO:0043281	BP	e	regulation of cysteine-type endopeptidase activity involved in apoptotic process	2/598	11/32695	0.0165	n.a.	2	1	1	1	Cdh1, Pycard
GO:0035914	BP	e	skeletal muscle cell differentiation	4/598	54/32695	0.017	n.a.	4	1	1	1	Atf3, Btg2, Maff, Nupr1
GO:1900087	BP	e	positive regulation of G1/S transition of mitotic cell cycle	3/598	30/32695	0.0171	n.a.	3	1	1	1	Adamts1, Aif1, Anxa1
GO:0032456	BP	e	endocytic recycling	3/598	30/32695	0.0171	n.a.	3	1	1	1	Dennd1c, Ehd4, Micall1
GO:0042113	BP	e	B cell activation	3/598	30/32695	0.0171	n.a.	3	1	1	1	Cd86, Lat2, Skap2
GO:0003148	BP	e	outflow tract septum morphogenesis	3/598	30/32695	0.0171	n.a.	3	1	1	1	Eng, Tbx1, Tgfbr2
GO:0010667	BP	e	negative regulation of cardiac muscle cell apoptotic process	3/598	30/32695	0.0171	n.a.	3	1	1	1	Nfe2l2, Rgl2, Sirt4
GO:0017148	BP	e	negative regulation of translation	5/598	82/32695	0.0173	n.a.	5	1	1	1	Ang, Btg2, Eif2ak2, Eif4ebp1, Rida
GO:0048389	BP	e	intermediate mesoderm development	1/598	1/32695	0.0183	n.a.	1	1	1	1	Osr1
GO:0071336	BP	e	regulation of hair follicle cell proliferation	1/598	1/32695	0.0183	n.a.	1	1	1	1	Runx1
GO:0090341	BP	e	negative regulation of secretion of lysosomal enzymes	1/598	1/32695	0.0183	n.a.	1	1	1	1	Nr1h3
GO:0060262	BP	e	negative regulation of N-terminal protein palmitoylation	1/598	1/32695	0.0183	n.a.	1	1	1	1	Hhatl
GO:0072010	BP	e	glomerular epithelium development	1/598	1/32695	0.0183	n.a.	1	1	1	1	Foxc1
GO:0002335	BP	e	mature B cell differentiation	1/598	1/32695	0.0183	n.a.	1	1	1	1	Pou2f2
GO:0032431	BP	e	activation of phospholipase A2 activity	1/598	1/32695	0.0183	n.a.	1	1	1	1	Ang
GO:0032652	BP	e	regulation of interleukin-1 production	1/598	1/32695	0.0183	n.a.	1	1	1	1	Anxa1
GO:0071103	BP	e	DNA conformation change	1/598	1/32695	0.0183	n.a.	1	1	1	1	Hhex
GO:1901585	BP	e	regulation of acid-sensing ion channel activity	1/598	1/32695	0.0183	n.a.	1	1	1	1	Stom
GO:0034178	BP	e	toll-like receptor 13 signaling pathway	1/598	1/32695	0.0183	n.a.	1	1	1	1	Tlr13
GO:1904141	BP	e	positive regulation of microglial cell migration	1/598	1/32695	0.0183	n.a.	1	1	1	1	Csf1
GO:0010925	BP	e	positive regulation of inositol-polyphosphate 5-phosphatase activity	1/598	1/32695	0.0183	n.a.	1	1	1	1	Plek
GO:1905581	BP	e	positive regulation of low-density lipoprotein particle clearance	1/598	1/32695	0.0183	n.a.	1	1	1	1	Anxa2
GO:0002923	BP	e	regulation of humoral immune response mediated by circulating immunoglobulin	1/598	1/32695	0.0183	n.a.	1	1	1	1	Ptprc
GO:0014722	BP	e	regulation of skeletal muscle contraction by calcium ion signaling	1/598	1/32695	0.0183	n.a.	1	1	1	1	Dmpk
GO:0072076	BP	e	nephrogenic mesenchyme development	1/598	1/32695	0.0183	n.a.	1	1	1	1	Foxd1
GO:0002316	BP	e	follicular B cell differentiation	1/598	1/32695	0.0183	n.a.	1	1	1	1	Plcg2
GO:0038133	BP	e	ERBB2-ERBB3 signaling pathway	1/598	1/32695	0.0183	n.a.	1	1	1	1	Myoc
GO:1900085	BP	e	negative regulation of peptidyl-tyrosine autophosphorylation	1/598	1/32695	0.0183	n.a.	1	1	1	1	Cav1
GO:0090242	BP	e	retinoic acid receptor signaling pathway involved in somitogenesis	1/598	1/32695	0.0183	n.a.	1	1	1	1	Aldh1a2
GO:0001300	BP	e	chronological cell aging	1/598	1/32695	0.0183	n.a.	1	1	1	1	Eng
GO:1902624	BP	e	positive regulation of neutrophil migration	1/598	1/32695	0.0183	n.a.	1	1	1	1	Il1a
GO:0045342	BP	e	MHC class II biosynthetic process	1/598	1/32695	0.0183	n.a.	1	1	1	1	Slc11a1
GO:0002575	BP	e	basophil chemotaxis	1/598	1/32695	0.0183	n.a.	1	1	1	1	Vegfa
GO:0050857	BP	e	positive regulation of antigen receptor-mediated signaling pathway	1/598	1/32695	0.0183	n.a.	1	1	1	1	Ptprc
GO:0060305	BP	e	regulation of cell diameter	1/598	1/32695	0.0183	n.a.	1	1	1	1	Plek
GO:0045362	BP	e	positive regulation of interleukin-1 biosynthetic process	1/598	1/32695	0.0183	n.a.	1	1	1	1	Tlr4
GO:0032458	BP	e	slow endocytic recycling	1/598	1/32695	0.0183	n.a.	1	1	1	1	Micall1
GO:0035795	BP	e	negative regulation of mitochondrial membrane permeability	1/598	1/32695	0.0183	n.a.	1	1	1	1	Hk2
GO:0038178	BP	e	complement component C5a signaling pathway	1/598	1/32695	0.0183	n.a.	1	1	1	1	C5ar1
GO:0015838	BP	e	amino-acid betaine transport	1/598	1/32695	0.0183	n.a.	1	1	1	1	Slc6a20a
GO:0043322	BP	e	negative regulation of natural killer cell degranulation	1/598	1/32695	0.0183	n.a.	1	1	1	1	Lgals9
GO:0060183	BP	e	apelin receptor signaling pathway	1/598	1/32695	0.0183	n.a.	1	1	1	1	Apln
GO:0072183	BP	e	negative regulation of nephron tubule epithelial cell differentiation	1/598	1/32695	0.0183	n.a.	1	1	1	1	Osr1
GO:0072184	BP	e	renal vesicle progenitor cell differentiation	1/598	1/32695	0.0183	n.a.	1	1	1	1	Osr1
GO:2000097	BP	e	regulation of smooth muscle cell-matrix adhesion	1/598	1/32695	0.0183	n.a.	1	1	1	1	Plau
GO:2000545	BP	e	negative regulation of endothelial cell chemotaxis to fibroblast growth factor	1/598	1/32695	0.0183	n.a.	1	1	1	1	Cxcl13
GO:0072213	BP	e	metanephric capsule development	1/598	1/32695	0.0183	n.a.	1	1	1	1	Foxd1
GO:0006530	BP	e	asparagine catabolic process	1/598	1/32695	0.0183	n.a.	1	1	1	1	Aspg
GO:0072376	BP	e	protein activation cascade	1/598	1/32695	0.0183	n.a.	1	1	1	1	Mvp
GO:0043244	BP	e	regulation of protein complex disassembly	1/598	1/32695	0.0183	n.a.	1	1	1	1	Irak3
GO:0002645	BP	e	positive regulation of tolerance induction	1/598	1/32695	0.0183	n.a.	1	1	1	1	H2-M3
GO:0031664	BP	e	regulation of lipopolysaccharide-mediated signaling pathway	1/598	1/32695	0.0183	n.a.	1	1	1	1	Cd84
GO:0002881	BP	e	negative regulation of chronic inflammatory response to non-antigenic stimulus	1/598	1/32695	0.0183	n.a.	1	1	1	1	Cx3cr1
GO:0071471	BP	e	cellular response to non-ionic osmotic stress	1/598	1/32695	0.0183	n.a.	1	1	1	1	Ptgs2
GO:1904467	BP	e	regulation of tumor necrosis factor secretion	1/598	1/32695	0.0183	n.a.	1	1	1	1	Tlr4
GO:0072234	BP	e	metanephric nephron tubule development	1/598	1/32695	0.0183	n.a.	1	1	1	1	Osr1
GO:0002663	BP	e	positive regulation of B cell tolerance induction	1/598	1/32695	0.0183	n.a.	1	1	1	1	Tgfbr2
GO:0002668	BP	e	negative regulation of T cell anergy	1/598	1/32695	0.0183	n.a.	1	1	1	1	Cd86
GO:1905317	BP	e	inferior endocardial cushion morphogenesis	1/598	1/32695	0.0183	n.a.	1	1	1	1	Tgfbr2
GO:1905316	BP	e	superior endocardial cushion morphogenesis	1/598	1/32695	0.0183	n.a.	1	1	1	1	Tgfbr2
GO:1905315	BP	e	cell proliferation involved in endocardial cushion morphogenesis	1/598	1/32695	0.0183	n.a.	1	1	1	1	Tgfbr2
GO:1905310	BP	e	regulation of cardiac neural crest cell migration involved in outflow tract morphogenesis	1/598	1/32695	0.0183	n.a.	1	1	1	1	Eng
GO:0010585	BP	e	glutamine secretion	1/598	1/32695	0.0183	n.a.	1	1	1	1	Slc1a5
GO:1904445	BP	e	negative regulation of establishment of Sertoli cell barrier	1/598	1/32695	0.0183	n.a.	1	1	1	1	Il1a
GO:0072259	BP	e	metanephric interstitial fibroblast development	1/598	1/32695	0.0183	n.a.	1	1	1	1	Osr1
GO:1904998	BP	e	negative regulation of leukocyte adhesion to arterial endothelial cell	1/598	1/32695	0.0183	n.a.	1	1	1	1	Klf4
GO:0033668	BP	e	negative regulation by symbiont of host apoptotic process	1/598	1/32695	0.0183	n.a.	1	1	1	1	Serpinb9
GO:1903082	BP	e	positive regulation of C-C chemokine receptor CCR7 signaling pathway	1/598	1/32695	0.0183	n.a.	1	1	1	1	Trem2
GO:1905662	BP	e	negative regulation of telomerase RNA reverse transcriptase activity	1/598	1/32695	0.0183	n.a.	1	1	1	1	Parp3
GO:1901565	BP	e	organonitrogen compound catabolic process	1/598	1/32695	0.0183	n.a.	1	1	1	1	Rida
GO:0043545	BP	e	molybdopterin cofactor metabolic process	1/598	1/32695	0.0183	n.a.	1	1	1	1	Mocos
GO:1903431	BP	e	positive regulation of cell maturation	1/598	1/32695	0.0183	n.a.	1	1	1	1	Runx1
GO:0002626	BP	e	negative regulation of T cell antigen processing and presentation	1/598	1/32695	0.0183	n.a.	1	1	1	1	Hfe
GO:0039528	BP	e	cytoplasmic pattern recognition receptor signaling pathway in response to virus	1/598	1/32695	0.0183	n.a.	1	1	1	1	Tmem173
GO:0090094	BP	e	metanephric cap mesenchymal cell proliferation involved in metanephros development	1/598	1/32695	0.0183	n.a.	1	1	1	1	Osr1
GO:0042905	BP	e	9-cis-retinoic acid metabolic process	1/598	1/32695	0.0183	n.a.	1	1	1	1	Aldh1a1
GO:0007039	BP	e	protein catabolic process in the vacuole	1/598	1/32695	0.0183	n.a.	1	1	1	1	Tcirg1
GO:1901624	BP	e	negative regulation of lymphocyte chemotaxis	1/598	1/32695	0.0183	n.a.	1	1	1	1	Padi2
GO:0010657	BP	e	muscle cell apoptotic process	1/598	1/32695	0.0183	n.a.	1	1	1	1	Dmpk
GO:0001576	BP	e	globoside biosynthetic process	1/598	1/32695	0.0183	n.a.	1	1	1	1	A4galt
GO:1904283	BP	e	negative regulation of antigen processing and presentation of endogenous peptide antigen via MHC class I	1/598	1/32695	0.0183	n.a.	1	1	1	1	Hfe
GO:0061011	BP	e	hepatic duct development	1/598	1/32695	0.0183	n.a.	1	1	1	1	Hhex
GO:0006051	BP	e	N-acetylmannosamine metabolic process	1/598	1/32695	0.0183	n.a.	1	1	1	1	Renbp
GO:0072143	BP	e	mesangial cell development	1/598	1/32695	0.0183	n.a.	1	1	1	1	Osr1
GO:0002767	BP	e	immune response-inhibiting cell surface receptor signaling pathway	1/598	1/32695	0.0183	n.a.	1	1	1	1	H2-M3
GO:0061485	BP	e	memory T cell proliferation	1/598	1/32695	0.0183	n.a.	1	1	1	1	Dock8
GO:0070839	BP	e	divalent metal ion export	1/598	1/32695	0.0183	n.a.	1	1	1	1	Slc11a1
GO:1902721	BP	e	negative regulation of prolactin secretion	1/598	1/32695	0.0183	n.a.	1	1	1	1	Anxa5
GO:0070951	BP	e	regulation of neutrophil mediated killing of gram-negative bacterium	1/598	1/32695	0.0183	n.a.	1	1	1	1	Cxcl5
GO:0070489	BP	e	T cell aggregation	1/598	1/32695	0.0183	n.a.	1	1	1	1	Msn
GO:1903803	BP	e	L-glutamine import across plasma membrane	1/598	1/32695	0.0183	n.a.	1	1	1	1	Slc1a5
GO:1900138	BP	e	negative regulation of phospholipase A2 activity	1/598	1/32695	0.0183	n.a.	1	1	1	1	Anxa1
GO:0072168	BP	e	specification of anterior mesonephric tubule identity	1/598	1/32695	0.0183	n.a.	1	1	1	1	Osr1
GO:0051580	BP	e	regulation of neurotransmitter uptake	1/598	1/32695	0.0183	n.a.	1	1	1	1	Gfap
GO:0010952	BP	e	positive regulation of peptidase activity	1/598	1/32695	0.0183	n.a.	1	1	1	1	Ctsh
GO:1902228	BP	e	positive regulation of macrophage colony-stimulating factor signaling pathway	1/598	1/32695	0.0183	n.a.	1	1	1	1	Csf1
GO:0002462	BP	e	tolerance induction to nonself antigen	1/598	1/32695	0.0183	n.a.	1	1	1	1	C3ar1
GO:0015682	BP	e	ferric iron transport	1/598	1/32695	0.0183	n.a.	1	1	1	1	Trf
GO:0002287	BP	e	alpha-beta T cell activation involved in immune response	1/598	1/32695	0.0183	n.a.	1	1	1	1	H2-M3
GO:0060217	BP	e	hemangioblast cell differentiation	1/598	1/32695	0.0183	n.a.	1	1	1	1	Tal1
GO:0072169	BP	e	specification of posterior mesonephric tubule identity	1/598	1/32695	0.0183	n.a.	1	1	1	1	Osr1
GO:0061642	BP	e	chemoattraction of axon	1/598	1/32695	0.0183	n.a.	1	1	1	1	Robo3
GO:0014853	BP	e	regulation of excitatory postsynaptic membrane potential involved in skeletal muscle contraction	1/598	1/32695	0.0183	n.a.	1	1	1	1	Dmpk
GO:0030845	BP	e	phospholipase C-inhibiting G-protein coupled receptor signaling pathway	1/598	1/32695	0.0183	n.a.	1	1	1	1	Plek
GO:0046086	BP	e	adenosine biosynthetic process	1/598	1/32695	0.0183	n.a.	1	1	1	1	Nt5e
GO:2000325	BP	e	regulation of ligand-dependent nuclear receptor transcription coactivator activity	1/598	1/32695	0.0183	n.a.	1	1	1	1	Nr1h3
GO:2000136	BP	e	regulation of cell proliferation involved in heart morphogenesis	1/598	1/32695	0.0183	n.a.	1	1	1	1	Eng
GO:0015707	BP	e	nitrite transport	1/598	1/32695	0.0183	n.a.	1	1	1	1	Slc11a1
GO:0010933	BP	e	positive regulation of macrophage tolerance induction	1/598	1/32695	0.0183	n.a.	1	1	1	1	Irak3
GO:1905597	BP	e	positive regulation of low-density lipoprotein particle receptor binding	1/598	1/32695	0.0183	n.a.	1	1	1	1	Anxa2
GO:1905599	BP	e	positive regulation of low-density lipoprotein receptor activity	1/598	1/32695	0.0183	n.a.	1	1	1	1	Anxa2
GO:0021534	BP	e	cell proliferation in hindbrain	1/598	1/32695	0.0183	n.a.	1	1	1	1	C5ar1
GO:1904714	BP	e	regulation of chaperone-mediated autophagy	1/598	1/32695	0.0183	n.a.	1	1	1	1	Gfap
GO:0014739	BP	e	positive regulation of muscle hyperplasia	1/598	1/32695	0.0183	n.a.	1	1	1	1	Aif1
GO:0014895	BP	e	smooth muscle hypertrophy	1/598	1/32695	0.0183	n.a.	1	1	1	1	Cyba
GO:0034127	BP	e	regulation of MyD88-independent toll-like receptor signaling pathway	1/598	1/32695	0.0183	n.a.	1	1	1	1	Irf7
GO:0061444	BP	e	endocardial cushion cell development	1/598	1/32695	0.0183	n.a.	1	1	1	1	Jag1
GO:0052362	BP	e	catabolism by host of symbiont protein	1/598	1/32695	0.0183	n.a.	1	1	1	1	Anxa2
GO:0045355	BP	e	negative regulation of interferon-alpha biosynthetic process	1/598	1/32695	0.0183	n.a.	1	1	1	1	Nmi
GO:0019478	BP	e	D-amino acid catabolic process	1/598	1/32695	0.0183	n.a.	1	1	1	1	Ddo
GO:0032685	BP	e	negative regulation of granulocyte macrophage colony-stimulating factor production	1/598	1/32695	0.0183	n.a.	1	1	1	1	Cd84
GO:0015742	BP	e	alpha-ketoglutarate transport	1/598	1/32695	0.0183	n.a.	1	1	1	1	Slc22a6
GO:0061163	BP	e	endoplasmic reticulum polarization	1/598	1/32695	0.0183	n.a.	1	1	1	1	Shtn1
GO:1903487	BP	e	regulation of lactation	1/598	1/32695	0.0183	n.a.	1	1	1	1	Oas2
GO:1901706	BP	e	mesenchymal cell differentiation involved in bone development	1/598	1/32695	0.0183	n.a.	1	1	1	1	Ranbp3l
GO:0038168	BP	e	epidermal growth factor receptor signaling pathway via I-kappaB kinase/NF-kappaB cascade	1/598	1/32695	0.0183	n.a.	1	1	1	1	Rassf2
GO:0003163	BP	e	sinoatrial node development	1/598	1/32695	0.0183	n.a.	1	1	1	1	Tbx18
GO:1904022	BP	e	positive regulation of G-protein coupled receptor internalization	1/598	1/32695	0.0183	n.a.	1	1	1	1	Apln
GO:0006196	BP	e	AMP catabolic process	1/598	1/32695	0.0183	n.a.	1	1	1	1	Nt5e
GO:0060375	BP	e	regulation of mast cell differentiation	1/598	1/32695	0.0183	n.a.	1	1	1	1	Tal1
GO:0052547	BP	e	regulation of peptidase activity	1/598	1/32695	0.0183	n.a.	1	1	1	1	Cav1
GO:0003106	BP	e	negative regulation of glomerular filtration by angiotensin	1/598	1/32695	0.0183	n.a.	1	1	1	1	Cyba
GO:0072208	BP	e	metanephric smooth muscle tissue development	1/598	1/32695	0.0183	n.a.	1	1	1	1	Osr1
GO:0043060	BP	e	meiotic metaphase I plate congression	1/598	1/32695	0.0183	n.a.	1	1	1	1	Mlh1
GO:0015868	BP	e	purine ribonucleotide transport	1/598	1/32695	0.0183	n.a.	1	1	1	1	Gjb1
GO:0010813	BP	e	neuropeptide catabolic process	1/598	1/32695	0.0183	n.a.	1	1	1	1	Ctsh
GO:0002651	BP	e	positive regulation of tolerance induction to self antigen	1/598	1/32695	0.0183	n.a.	1	1	1	1	Tgfbr2
GO:1903217	BP	e	negative regulation of protein processing involved in protein targeting to mitochondrion	1/598	1/32695	0.0183	n.a.	1	1	1	1	Sirt4
GO:1903975	BP	e	regulation of glial cell migration	1/598	1/32695	0.0183	n.a.	1	1	1	1	Efemp1
GO:0042231	BP	e	interleukin-13 biosynthetic process	1/598	1/32695	0.0183	n.a.	1	1	1	1	Il18
GO:0060678	BP	e	dichotomous subdivision of terminal units involved in ureteric bud branching	1/598	1/32695	0.0183	n.a.	1	1	1	1	Foxd1
GO:0000820	BP	e	regulation of glutamine family amino acid metabolic process	1/598	1/32695	0.0183	n.a.	1	1	1	1	Sirt4
GO:0042892	BP	e	chloramphenicol transport	1/598	1/32695	0.0183	n.a.	1	1	1	1	Tlr2
GO:2000027	BP	e	regulation of organ morphogenesis	1/598	1/32695	0.0183	n.a.	1	1	1	1	Tbx1
GO:1904182	BP	e	regulation of pyruvate dehydrogenase activity	1/598	1/32695	0.0183	n.a.	1	1	1	1	Sirt4
GO:1904188	BP	e	negative regulation of transformation of host cell by virus	1/598	1/32695	0.0183	n.a.	1	1	1	1	Fbln1
GO:0035769	BP	e	B cell chemotaxis across high endothelial venule	1/598	1/32695	0.0183	n.a.	1	1	1	1	Cxcl13
GO:0035768	BP	e	endothelial cell chemotaxis to fibroblast growth factor	1/598	1/32695	0.0183	n.a.	1	1	1	1	Cxcl13
GO:0060611	BP	e	mammary gland fat development	1/598	1/32695	0.0183	n.a.	1	1	1	1	Csf1
GO:0070430	BP	e	positive regulation of nucleotide-binding oligomerization domain containing 1 signaling pathway	1/598	1/32695	0.0183	n.a.	1	1	1	1	Tlr4
GO:0060829	BP	e	negative regulation of canonical Wnt signaling pathway involved in neural plate anterior/posterior pattern formation	1/598	1/32695	0.0183	n.a.	1	1	1	1	Tbx18
GO:0060448	BP	e	dichotomous subdivision of terminal units involved in lung branching	1/598	1/32695	0.0183	n.a.	1	1	1	1	Ctsh
GO:0039530	BP	e	MDA-5 signaling pathway	1/598	1/32695	0.0183	n.a.	1	1	1	1	Ifih1
GO:0072267	BP	e	metanephric capsule specification	1/598	1/32695	0.0183	n.a.	1	1	1	1	Foxd1
GO:1900225	BP	e	regulation of NLRP3 inflammasome complex assembly	1/598	1/32695	0.0183	n.a.	1	1	1	1	Eif2ak2
GO:0060588	BP	e	negative regulation of lipoprotein lipid oxidation	1/598	1/32695	0.0183	n.a.	1	1	1	1	Apod
GO:0006835	BP	e	dicarboxylic acid transport	1/598	1/32695	0.0183	n.a.	1	1	1	1	Slc13a3
GO:0010625	BP	e	positive regulation of Schwann cell proliferation	1/598	1/32695	0.0183	n.a.	1	1	1	1	Gfap
GO:0034238	BP	e	macrophage fusion	1/598	1/32695	0.0183	n.a.	1	1	1	1	Cd44
GO:0032274	BP	e	gonadotropin secretion	1/598	1/32695	0.0183	n.a.	1	1	1	1	Fam129b
GO:0033580	BP	e	protein galactosylation at cell surface	1/598	1/32695	0.0183	n.a.	1	1	1	1	Ggta1
GO:0009794	BP	e	regulation of mitotic cell cycle, embryonic	1/598	1/32695	0.0183	n.a.	1	1	1	1	E4f1
GO:0070392	BP	e	detection of lipoteichoic acid	1/598	1/32695	0.0183	n.a.	1	1	1	1	Trem2
GO:0006876	BP	e	cellular cadmium ion homeostasis	1/598	1/32695	0.0183	n.a.	1	1	1	1	Slc11a1
GO:0009635	BP	e	response to herbicide	1/598	1/32695	0.0183	n.a.	1	1	1	1	Lcn2
GO:0042313	BP	e	protein kinase C deactivation	1/598	1/32695	0.0183	n.a.	1	1	1	1	Edn1
GO:1902038	BP	e	positive regulation of hematopoietic stem cell differentiation	1/598	1/32695	0.0183	n.a.	1	1	1	1	Foxc1
GO:0018872	BP	e	arsonoacetate metabolic process	1/598	1/32695	0.0183	n.a.	1	1	1	1	As3mt
GO:0045799	BP	e	positive regulation of chromatin assembly or disassembly	1/598	1/32695	0.0183	n.a.	1	1	1	1	Tal1
GO:0002758	BP	e	innate immune response-activating signal transduction	1/598	1/32695	0.0183	n.a.	1	1	1	1	Tlr4
GO:0044147	BP	e	negative regulation of development of symbiont involved in interaction with host	1/598	1/32695	0.0183	n.a.	1	1	1	1	Anxa2
GO:0032499	BP	e	detection of peptidoglycan	1/598	1/32695	0.0183	n.a.	1	1	1	1	Trem2
GO:0061573	BP	e	actin filament bundle retrograde transport	1/598	1/32695	0.0183	n.a.	1	1	1	1	Shtn1
GO:0031323	BP	e	regulation of cellular metabolic process	1/598	1/32695	0.0183	n.a.	1	1	1	1	Hexb
GO:0009855	BP	e	determination of bilateral symmetry	1/598	1/32695	0.0183	n.a.	1	1	1	1	Aldh1a2
GO:1903572	BP	e	positive regulation of protein kinase D signaling	1/598	1/32695	0.0183	n.a.	1	1	1	1	Vegfa
GO:0014806	BP	e	smooth muscle hyperplasia	1/598	1/32695	0.0183	n.a.	1	1	1	1	Nos3
GO:1900147	BP	e	regulation of Schwann cell migration	1/598	1/32695	0.0183	n.a.	1	1	1	1	Vim
GO:0090366	BP	e	positive regulation of mRNA modification	1/598	1/32695	0.0183	n.a.	1	1	1	1	Apobec1
GO:1902239	BP	e	negative regulation of intrinsic apoptotic signaling pathway in response to osmotic stress by p53 class mediator	1/598	1/32695	0.0183	n.a.	1	1	1	1	Bdkrb2
GO:2000350	BP	e	positive regulation of CD40 signaling pathway	1/598	1/32695	0.0183	n.a.	1	1	1	1	Trem2
GO:0051257	BP	e	meiotic spindle midzone assembly	1/598	1/32695	0.0183	n.a.	1	1	1	1	Mlh1
GO:0002477	BP	e	antigen processing and presentation of exogenous peptide antigen via MHC class Ib	1/598	1/32695	0.0183	n.a.	1	1	1	1	H2-M3
GO:0051641	BP	e	cellular localization	1/598	1/32695	0.0183	n.a.	1	1	1	1	Myo1d
GO:1905222	BP	e	atrioventricular canal morphogenesis	1/598	1/32695	0.0183	n.a.	1	1	1	1	Eng
GO:0032632	BP	e	interleukin-3 production	1/598	1/32695	0.0183	n.a.	1	1	1	1	Slc11a1
GO:0052063	BP	e	induction by symbiont of defense-related host nitric oxide production	1/598	1/32695	0.0183	n.a.	1	1	1	1	Tlr2
GO:0002040	BP	e	sprouting angiogenesis	3/598	31/32695	0.0187	n.a.	3	1	1	1	Eng, Rnf213, Vegfa
GO:0031424	BP	e	keratinization	3/598	31/32695	0.0187	n.a.	3	1	1	1	Il1a, Ppl, Tgm1
GO:0032967	BP	e	positive regulation of collagen biosynthetic process	3/598	31/32695	0.0187	n.a.	3	1	1	1	Eng, Il18, Vim
GO:0008630	BP	e	intrinsic apoptotic signaling pathway in response to DNA damage	4/598	56/32695	0.0192	n.a.	4	1	1	1	Mlh1, Pycard, Tnfrsf1a, Tnfrsf1b
GO:0030857	BP	e	negative regulation of epithelial cell differentiation	2/598	12/32695	0.0195	n.a.	2	1	1	1	Cav1, Osr1
GO:0071375	BP	e	cellular response to peptide hormone stimulus	2/598	12/32695	0.0195	n.a.	2	1	1	1	Cav1, Il18
GO:0045577	BP	e	regulation of B cell differentiation	2/598	12/32695	0.0195	n.a.	2	1	1	1	Ptprc, Zfp36l2
GO:0050927	BP	e	positive regulation of positive chemotaxis	2/598	12/32695	0.0195	n.a.	2	1	1	1	Kdr, Vegfa
GO:0045603	BP	e	positive regulation of endothelial cell differentiation	2/598	12/32695	0.0195	n.a.	2	1	1	1	Acvrl1, Atoh8
GO:0060700	BP	e	regulation of ribonuclease activity	2/598	12/32695	0.0195	n.a.	2	1	1	1	Oas2, Oasl2
GO:0044319	BP	e	wound healing, spreading of cells	2/598	12/32695	0.0195	n.a.	2	1	1	1	Cd151, Cd44
GO:0051926	BP	e	negative regulation of calcium ion transport	2/598	12/32695	0.0195	n.a.	2	1	1	1	Nos3, Ptgs2
GO:0032740	BP	e	positive regulation of interleukin-17 production	2/598	12/32695	0.0195	n.a.	2	1	1	1	Il18, Ly9
GO:0019538	BP	e	protein metabolic process	2/598	12/32695	0.0195	n.a.	2	1	1	1	Cdh1, Tgm1
GO:0060546	BP	e	negative regulation of necroptotic process	2/598	12/32695	0.0195	n.a.	2	1	1	1	Casp8, Cav1
GO:0070233	BP	e	negative regulation of T cell apoptotic process	2/598	12/32695	0.0195	n.a.	2	1	1	1	Dock8, Serpinb9
GO:0001523	BP	e	retinoid metabolic process	2/598	12/32695	0.0195	n.a.	2	1	1	1	Aldh1a1, Aldh1a2
GO:0002430	BP	e	complement receptor mediated signaling pathway	2/598	12/32695	0.0195	n.a.	2	1	1	1	C3ar1, C5ar1
GO:0051091	BP	e	positive regulation of DNA-binding transcription factor activity	6/598	116/32695	0.02	n.a.	6	1	1	1	Anxa3, Edn1, Hcls1, Pycard, Tlr4, Tmem173
GO:0071345	BP	e	cellular response to cytokine stimulus	3/598	32/32695	0.0204	n.a.	3	1	1	1	Csf1r, Hcls1, Stat3
GO:0045840	BP	e	positive regulation of mitotic nuclear division	3/598	32/32695	0.0204	n.a.	3	1	1	1	Edn1, Edn3, Il1a
GO:0007595	BP	e	lactation	3/598	32/32695	0.0204	n.a.	3	1	1	1	Cav1, Prl, Vegfa
GO:0030512	BP	e	negative regulation of transforming growth factor beta receptor signaling pathway	4/598	58/32695	0.0216	n.a.	4	1	1	1	Cav1, Cd109, Htra3, Snx1
GO:0030833	BP	e	regulation of actin filament polymerization	3/598	33/32695	0.0221	n.a.	3	1	1	1	Arhgap18, Arpc1b, Hcls1
GO:0051209	BP	e	release of sequestered calcium ion into cytosol	3/598	33/32695	0.0221	n.a.	3	1	1	1	Itpr3, Plcg2, Ptprc
GO:0048015	BP	e	phosphatidylinositol-mediated signaling	3/598	33/32695	0.0221	n.a.	3	1	1	1	Car8, Csf1r, Gab2
GO:0007219	BP	e	Notch signaling pathway	6/598	119/32695	0.0224	n.a.	6	1	1	1	Anxa4, Bhlhe41, Foxc1, Hhex, Jag1, Tgfbr2
GO:0048304	BP	e	positive regulation of isotype switching to IgG isotypes	2/598	13/32695	0.0228	n.a.	2	1	1	1	Mlh1, Ptprc
GO:0071679	BP	e	commissural neuron axon guidance	2/598	13/32695	0.0228	n.a.	2	1	1	1	Robo3, Vegfa
GO:0090141	BP	e	positive regulation of mitochondrial fission	2/598	13/32695	0.0228	n.a.	2	1	1	1	Dcn, Kdr
GO:0097320	BP	e	plasma membrane tubulation	2/598	13/32695	0.0228	n.a.	2	1	1	1	Micall1, Snx9
GO:0016331	BP	e	morphogenesis of embryonic epithelium	2/598	13/32695	0.0228	n.a.	2	1	1	1	Aldh1a2, Tbx18
GO:0042532	BP	e	negative regulation of tyrosine phosphorylation of STAT protein	2/598	13/32695	0.0228	n.a.	2	1	1	1	Cav1, Socs3
GO:0032609	BP	e	interferon-gamma production	2/598	13/32695	0.0228	n.a.	2	1	1	1	Il18, Tlr4
GO:0042573	BP	e	retinoic acid metabolic process	2/598	13/32695	0.0228	n.a.	2	1	1	1	Aldh1a1, Aldh1a2
GO:0002523	BP	e	leukocyte migration involved in inflammatory response	2/598	13/32695	0.0228	n.a.	2	1	1	1	Itgam, Itgb2
GO:0097202	BP	e	activation of cysteine-type endopeptidase activity	2/598	13/32695	0.0228	n.a.	2	1	1	1	Casp8, Pycard
GO:0097011	BP	e	cellular response to granulocyte macrophage colony-stimulating factor stimulus	2/598	13/32695	0.0228	n.a.	2	1	1	1	Csf2ra, Zfp36l2
GO:1903428	BP	e	positive regulation of reactive oxygen species biosynthetic process	2/598	13/32695	0.0228	n.a.	2	1	1	1	Cyba, Tlr4
GO:0050930	BP	e	induction of positive chemotaxis	2/598	13/32695	0.0228	n.a.	2	1	1	1	Cxcl12, Vegfa
GO:0032233	BP	e	positive regulation of actin filament bundle assembly	2/598	13/32695	0.0228	n.a.	2	1	1	1	Plek, Synpo2
GO:0043117	BP	e	positive regulation of vascular permeability	2/598	13/32695	0.0228	n.a.	2	1	1	1	Il18, Vegfa
GO:0033138	BP	e	positive regulation of peptidyl-serine phosphorylation	5/598	88/32695	0.0228	n.a.	5	1	1	1	Cav1, Cd44, Hcls1, Ptgs2, Vegfa
GO:0050900	BP	e	leukocyte migration	3/598	34/32695	0.0239	n.a.	3	1	1	1	C3ar1, C5ar1, Podxl
GO:0050715	BP	e	positive regulation of cytokine secretion	3/598	34/32695	0.0239	n.a.	3	1	1	1	Cd14, Il1a, Tlr2
GO:0009636	BP	e	response to toxic substance	4/598	60/32695	0.0241	n.a.	4	1	1	1	Eif2ak2, Mbp, Nupr1, Slc7a11
GO:0035115	BP	e	embryonic forelimb morphogenesis	3/598	35/32695	0.0258	n.a.	3	1	1	1	Aldh1a2, Osr1, Reck
GO:0045776	BP	e	negative regulation of blood pressure	3/598	35/32695	0.0258	n.a.	3	1	1	1	Apln, Bdkrb2, Nos3
GO:0031100	BP	e	animal organ regeneration	2/598	14/32695	0.0263	n.a.	2	1	1	1	Cxcl12, Cxcl5
GO:0001946	BP	e	lymphangiogenesis	2/598	14/32695	0.0263	n.a.	2	1	1	1	Acvrl1, Vegfa
GO:0051895	BP	e	negative regulation of focal adhesion assembly	2/598	14/32695	0.0263	n.a.	2	1	1	1	Acvrl1, Apod
GO:0061158	BP	e	3'-UTR-mediated mRNA destabilization	2/598	14/32695	0.0263	n.a.	2	1	1	1	Zc3h12a, Zfp36l2
GO:0043249	BP	e	erythrocyte maturation	2/598	14/32695	0.0263	n.a.	2	1	1	1	Klf2, Tal1
GO:0045723	BP	e	positive regulation of fatty acid biosynthetic process	2/598	14/32695	0.0263	n.a.	2	1	1	1	Mlxipl, Nr1h3
GO:0061051	BP	e	positive regulation of cell growth involved in cardiac muscle cell development	2/598	14/32695	0.0263	n.a.	2	1	1	1	Edn1, Wisp1
GO:0009967	BP	e	positive regulation of signal transduction	2/598	14/32695	0.0263	n.a.	2	1	1	1	Cav1, Vegfa
GO:0071385	BP	e	cellular response to glucocorticoid stimulus	2/598	14/32695	0.0263	n.a.	2	1	1	1	Anxa1, Zfp36l2
GO:0030224	BP	e	monocyte differentiation	2/598	14/32695	0.0263	n.a.	2	1	1	1	Pir, Vegfa
GO:0030949	BP	e	positive regulation of vascular endothelial growth factor receptor signaling pathway	2/598	14/32695	0.0263	n.a.	2	1	1	1	Kdr, Vegfa
GO:2000178	BP	e	negative regulation of neural precursor cell proliferation	2/598	14/32695	0.0263	n.a.	2	1	1	1	Btg2, Ccr5
GO:0048545	BP	e	response to steroid hormone	2/598	14/32695	0.0263	n.a.	2	1	1	1	Lox, Spp1
GO:0019886	BP	e	antigen processing and presentation of exogenous peptide antigen via MHC class II	2/598	14/32695	0.0263	n.a.	2	1	1	1	Fcer1g, Unc93b1
GO:0032461	BP	e	positive regulation of protein oligomerization	2/598	14/32695	0.0263	n.a.	2	1	1	1	Aim2, Snx9
GO:0001818	BP	e	negative regulation of cytokine production	2/598	14/32695	0.0263	n.a.	2	1	1	1	Gpnmb, Slc11a1
GO:2000279	BP	e	negative regulation of DNA biosynthetic process	2/598	14/32695	0.0263	n.a.	2	1	1	1	Acvrl1, Fam129b
GO:0048246	BP	e	macrophage chemotaxis	2/598	14/32695	0.0263	n.a.	2	1	1	1	Ccl3, Cx3cr1
GO:0050709	BP	e	negative regulation of protein secretion	2/598	14/32695	0.0263	n.a.	2	1	1	1	Anxa1, Rsad2
GO:0032570	BP	e	response to progesterone	2/598	14/32695	0.0263	n.a.	2	1	1	1	Cav1, Nr1h3
GO:0002244	BP	e	hematopoietic progenitor cell differentiation	5/598	92/32695	0.027	n.a.	5	1	1	1	Anln, Arl11, Pld4, Ptprc, Samd9l
GO:0001933	BP	e	negative regulation of protein phosphorylation	5/598	92/32695	0.027	n.a.	5	1	1	1	Cd109, Cdk5rap3, Fbln1, Prr5l, Zc3h12a
GO:0043123	BP	e	positive regulation of I-kappaB kinase/NF-kappaB signaling	5/598	93/32695	0.0281	n.a.	5	1	1	1	Casp8, Il1a, S100b, Tlr4, Zc3hav1
GO:0006811	BP	e	ion transport	18/598	582/32695	0.0281	n.a.	18	1	1	1	Atp1b3, Clic4, Cybb, Fxyd5, Gabra6, Hfe, Itpr3, Kcne1l, Lcn2, Nipal4, P2rx4, Slc11a1, Slc13a3, Slc39a8, Steap3, Tmem37, Tmem63a, Trf
GO:1901215	BP	e	negative regulation of neuron death	4/598	63/32695	0.0283	n.a.	4	1	1	1	Gpnmb, Serpinf1, Stat3, Vegfa
GO:0051897	BP	e	positive regulation of protein kinase B signaling	5/598	94/32695	0.0293	n.a.	5	1	1	1	Eng, Hcls1, Il18, Myoc, Vegfa
GO:0051291	BP	e	protein heterooligomerization	5/598	94/32695	0.0293	n.a.	5	1	1	1	Gabra6, Hbb-b2, Itpr3, Stxbp3, Tnfrsf1a
GO:0007154	BP	e	cell communication	3/598	37/32695	0.0299	n.a.	3	1	1	1	Gjb1, Gjb2, Jag1
GO:0007342	BP	e	fusion of sperm to egg plasma membrane involved in single fertilization	2/598	15/32695	0.03	n.a.	2	1	1	1	Cd9, Spaca6
GO:0051044	BP	e	positive regulation of membrane protein ectodomain proteolysis	2/598	15/32695	0.03	n.a.	2	1	1	1	Snx9, Tnfrsf1b
GO:0032695	BP	e	negative regulation of interleukin-12 production	2/598	15/32695	0.03	n.a.	2	1	1	1	Irak3, Tlr2
GO:0010524	BP	e	positive regulation of calcium ion transport into cytosol	2/598	15/32695	0.03	n.a.	2	1	1	1	Cav1, P2rx4
GO:1905564	BP	e	positive regulation of vascular endothelial cell proliferation	2/598	15/32695	0.03	n.a.	2	1	1	1	Apln, Stat3
GO:0060347	BP	e	heart trabecula formation	2/598	15/32695	0.03	n.a.	2	1	1	1	Adamts1, Adgrg6
GO:0046888	BP	e	negative regulation of hormone secretion	2/598	15/32695	0.03	n.a.	2	1	1	1	Edn1, Edn3
GO:0010469	BP	e	regulation of signaling receptor activity	2/598	15/32695	0.03	n.a.	2	1	1	1	Cga, Plau
GO:0003184	BP	e	pulmonary valve morphogenesis	2/598	15/32695	0.03	n.a.	2	1	1	1	Jag1, Nos3
GO:0043069	BP	e	negative regulation of programmed cell death	2/598	15/32695	0.03	n.a.	2	1	1	1	Plcg2, Vegfa
GO:0032963	BP	e	collagen metabolic process	2/598	15/32695	0.03	n.a.	2	1	1	1	Tns2, Vps33b
GO:0050918	BP	e	positive chemotaxis	2/598	15/32695	0.03	n.a.	2	1	1	1	Plxnb3, Vegfa
GO:0015693	BP	e	magnesium ion transport	2/598	15/32695	0.03	n.a.	2	1	1	1	Magt1, Nipal4
GO:0048699	BP	e	generation of neurons	2/598	15/32695	0.03	n.a.	2	1	1	1	Cdh1, Tal1
GO:2000147	BP	e	positive regulation of cell motility	2/598	15/32695	0.03	n.a.	2	1	1	1	Csf1r, Trf
GO:0046426	BP	e	negative regulation of JAK-STAT cascade	2/598	15/32695	0.03	n.a.	2	1	1	1	Cav1, Socs3
GO:0043524	BP	e	negative regulation of neuron apoptotic process	7/598	163/32695	0.0308	n.a.	7	1	1	1	Btg2, C5ar1, Kdr, Mag, Nes, Nrbp2, Vegfa
GO:0003007	BP	e	heart morphogenesis	4/598	65/32695	0.0312	n.a.	4	1	1	1	Aldh1a2, Foxc1, Tbx1, Vegfa
GO:0097192	BP	e	extrinsic apoptotic signaling pathway in absence of ligand	3/598	38/32695	0.032	n.a.	3	1	1	1	Eya2, Il1a, Lcn2
GO:0048384	BP	e	retinoic acid receptor signaling pathway	2/598	16/32695	0.0338	n.a.	2	1	1	1	Aldh1a2, Tbx1
GO:0045019	BP	e	negative regulation of nitric oxide biosynthetic process	2/598	16/32695	0.0338	n.a.	2	1	1	1	Cav1, Zc3h12a
GO:0090051	BP	e	negative regulation of cell migration involved in sprouting angiogenesis	2/598	16/32695	0.0338	n.a.	2	1	1	1	Card10, Klf4
GO:0046887	BP	e	positive regulation of hormone secretion	2/598	16/32695	0.0338	n.a.	2	1	1	1	Edn1, Edn3
GO:0035909	BP	e	aorta morphogenesis	2/598	16/32695	0.0338	n.a.	2	1	1	1	Jag1, Tbx1
GO:0045667	BP	e	regulation of osteoblast differentiation	2/598	16/32695	0.0338	n.a.	2	1	1	1	Rassf2, Smoc1
GO:0030865	BP	e	cortical cytoskeleton organization	2/598	16/32695	0.0338	n.a.	2	1	1	1	Anln, Rhoj
GO:2000679	BP	e	positive regulation of transcription regulatory region DNA binding	2/598	16/32695	0.0338	n.a.	2	1	1	1	Fam129b, Lgals9
GO:1903672	BP	e	positive regulation of sprouting angiogenesis	2/598	16/32695	0.0338	n.a.	2	1	1	1	Klf4, Vegfa
GO:0017144	BP	e	drug metabolic process	2/598	16/32695	0.0338	n.a.	2	1	1	1	Cyp2e1, Fmo2
GO:1901381	BP	e	positive regulation of potassium ion transmembrane transport	2/598	16/32695	0.0338	n.a.	2	1	1	1	Edn3, Kcne1l
GO:0006044	BP	e	N-acetylglucosamine metabolic process	2/598	16/32695	0.0338	n.a.	2	1	1	1	Hexb, Renbp
GO:0070498	BP	e	interleukin-1-mediated signaling pathway	2/598	16/32695	0.0338	n.a.	2	1	1	1	Il1a, Irak3
GO:0060252	BP	e	positive regulation of glial cell proliferation	2/598	16/32695	0.0338	n.a.	2	1	1	1	Gfap, Vim
GO:0045747	BP	e	positive regulation of Notch signaling pathway	3/598	39/32695	0.0342	n.a.	3	1	1	1	Jag1, Reck, Stat3
GO:0038083	BP	e	peptidyl-tyrosine autophosphorylation	3/598	39/32695	0.0342	n.a.	3	1	1	1	Fes, Hck, Kdr
GO:0010033	BP	e	response to organic substance	4/598	67/32695	0.0344	n.a.	4	1	1	1	Anxa5, Gatm, Klf4, Spp1
GO:0006631	BP	e	fatty acid metabolic process	7/598	167/32695	0.0345	n.a.	7	1	1	1	Crot, Elovl1, Hpgds, Lpin3, Ptgds, Ptges, Ptgs2
GO:0006874	BP	e	cellular calcium ion homeostasis	5/598	99/32695	0.0355	n.a.	5	1	1	1	Cav1, Dmpk, Edn3, Hexb, S100b
GO:0007389	BP	e	pattern specification process	4/598	68/32695	0.036	n.a.	4	1	1	1	Acvrl1, Tbx1, Tgfbr2, Zic1
GO:0031109	BP	e	microtubule polymerization or depolymerization	1/598	2/32695	0.0362	n.a.	1	1	1	1	Cryab
GO:2000627	BP	e	positive regulation of miRNA catabolic process	1/598	2/32695	0.0362	n.a.	1	1	1	1	Zc3h12a
GO:0001909	BP	e	leukocyte mediated cytotoxicity	1/598	2/32695	0.0362	n.a.	1	1	1	1	Stxbp2
GO:0042095	BP	e	interferon-gamma biosynthetic process	1/598	2/32695	0.0362	n.a.	1	1	1	1	Il18
GO:0045659	BP	e	negative regulation of neutrophil differentiation	1/598	2/32695	0.0362	n.a.	1	1	1	1	Inpp5d
GO:0097152	BP	e	mesenchymal cell apoptotic process	1/598	2/32695	0.0362	n.a.	1	1	1	1	Tbx1
GO:0010920	BP	e	negative regulation of inositol phosphate biosynthetic process	1/598	2/32695	0.0362	n.a.	1	1	1	1	Plek
GO:0002920	BP	e	regulation of humoral immune response	1/598	2/32695	0.0362	n.a.	1	1	1	1	Cd37
GO:2000316	BP	e	regulation of T-helper 17 type immune response	1/598	2/32695	0.0362	n.a.	1	1	1	1	Lgals9
GO:0043179	BP	e	rhythmic excitation	1/598	2/32695	0.0362	n.a.	1	1	1	1	Edn1
GO:0072070	BP	e	loop of Henle development	1/598	2/32695	0.0362	n.a.	1	1	1	1	Jag1
GO:0015891	BP	e	siderophore transport	1/598	2/32695	0.0362	n.a.	1	1	1	1	Lcn2
GO:2001037	BP	e	positive regulation of tongue muscle cell differentiation	1/598	2/32695	0.0362	n.a.	1	1	1	1	Tbx1
GO:0070560	BP	e	protein secretion by platelet	1/598	2/32695	0.0362	n.a.	1	1	1	1	Plek
GO:2000872	BP	e	positive regulation of progesterone secretion	1/598	2/32695	0.0362	n.a.	1	1	1	1	Runx1
GO:0021644	BP	e	vagus nerve morphogenesis	1/598	2/32695	0.0362	n.a.	1	1	1	1	Tbx1
GO:2001202	BP	e	negative regulation of transforming growth factor-beta secretion	1/598	2/32695	0.0362	n.a.	1	1	1	1	Fbln1
GO:1902257	BP	e	negative regulation of apoptotic process involved in outflow tract morphogenesis	1/598	2/32695	0.0362	n.a.	1	1	1	1	Foxc1
GO:0070173	BP	e	regulation of enamel mineralization	1/598	2/32695	0.0362	n.a.	1	1	1	1	Dmp1
GO:0007320	BP	e	insemination	1/598	2/32695	0.0362	n.a.	1	1	1	1	Ddo
GO:0090241	BP	e	negative regulation of histone H4 acetylation	1/598	2/32695	0.0362	n.a.	1	1	1	1	Spi1
GO:0060327	BP	e	cytoplasmic actin-based contraction involved in cell motility	1/598	2/32695	0.0362	n.a.	1	1	1	1	Shtn1
GO:0002204	BP	e	somatic recombination of immunoglobulin genes involved in immune response	1/598	2/32695	0.0362	n.a.	1	1	1	1	Mlh1
GO:0002378	BP	e	immunoglobulin biosynthetic process	1/598	2/32695	0.0362	n.a.	1	1	1	1	Ptprc
GO:0016488	BP	e	farnesol catabolic process	1/598	2/32695	0.0362	n.a.	1	1	1	1	Akr1b8
GO:0061302	BP	e	smooth muscle cell-matrix adhesion	1/598	2/32695	0.0362	n.a.	1	1	1	1	Vtn
GO:0003158	BP	e	endothelium development	1/598	2/32695	0.0362	n.a.	1	1	1	1	Kdr
GO:0045368	BP	e	positive regulation of interleukin-13 biosynthetic process	1/598	2/32695	0.0362	n.a.	1	1	1	1	Tlr4
GO:0002518	BP	e	lymphocyte chemotaxis across high endothelial venule	1/598	2/32695	0.0362	n.a.	1	1	1	1	Cxcl13
GO:0044090	BP	e	positive regulation of vacuole organization	1/598	2/32695	0.0362	n.a.	1	1	1	1	Anxa2
GO:0046031	BP	e	ADP metabolic process	1/598	2/32695	0.0362	n.a.	1	1	1	1	Ampd3
GO:0006188	BP	e	IMP biosynthetic process	1/598	2/32695	0.0362	n.a.	1	1	1	1	Ampd3
GO:0097254	BP	e	renal tubular secretion	1/598	2/32695	0.0362	n.a.	1	1	1	1	Slc22a6
GO:0010848	BP	e	regulation of chromatin disassembly	1/598	2/32695	0.0362	n.a.	1	1	1	1	Padi2
GO:0072180	BP	e	mesonephric duct morphogenesis	1/598	2/32695	0.0362	n.a.	1	1	1	1	Osr1
GO:2000098	BP	e	negative regulation of smooth muscle cell-matrix adhesion	1/598	2/32695	0.0362	n.a.	1	1	1	1	Apod
GO:0002537	BP	e	nitric oxide production involved in inflammatory response	1/598	2/32695	0.0362	n.a.	1	1	1	1	Tlr4
GO:1903905	BP	e	positive regulation of establishment of T cell polarity	1/598	2/32695	0.0362	n.a.	1	1	1	1	Dock8
GO:0032823	BP	e	regulation of natural killer cell differentiation	1/598	2/32695	0.0362	n.a.	1	1	1	1	Lgals9
GO:0016078	BP	e	tRNA catabolic process	1/598	2/32695	0.0362	n.a.	1	1	1	1	Slfn8
GO:0060431	BP	e	primary lung bud formation	1/598	2/32695	0.0362	n.a.	1	1	1	1	Hhex
GO:0060433	BP	e	bronchus development	1/598	2/32695	0.0362	n.a.	1	1	1	1	Tgfbr2
GO:0060434	BP	e	bronchus morphogenesis	1/598	2/32695	0.0362	n.a.	1	1	1	1	Tgfbr2
GO:1903225	BP	e	negative regulation of endodermal cell differentiation	1/598	2/32695	0.0362	n.a.	1	1	1	1	Col5a2
GO:1904209	BP	e	positive regulation of chemokine (C-C motif) ligand 2 secretion	1/598	2/32695	0.0362	n.a.	1	1	1	1	Mbp
GO:0030185	BP	e	nitric oxide transport	1/598	2/32695	0.0362	n.a.	1	1	1	1	Edn1
GO:0072239	BP	e	metanephric glomerulus vasculature development	1/598	2/32695	0.0362	n.a.	1	1	1	1	Osr1
GO:0006550	BP	e	isoleucine catabolic process	1/598	2/32695	0.0362	n.a.	1	1	1	1	Bcat2
GO:0006551	BP	e	leucine metabolic process	1/598	2/32695	0.0362	n.a.	1	1	1	1	Bcat2
GO:0072350	BP	e	tricarboxylic acid metabolic process	1/598	2/32695	0.0362	n.a.	1	1	1	1	Sirt4
GO:0031583	BP	e	phospholipase D-activating G-protein coupled receptor signaling pathway	1/598	2/32695	0.0362	n.a.	1	1	1	1	Edn1
GO:1903788	BP	e	positive regulation of glutathione biosynthetic process	1/598	2/32695	0.0362	n.a.	1	1	1	1	Nfe2l2
GO:1904881	BP	e	cellular response to hydrogen sulfide	1/598	2/32695	0.0362	n.a.	1	1	1	1	Kdr
GO:0032804	BP	e	negative regulation of low-density lipoprotein particle receptor catabolic process	1/598	2/32695	0.0362	n.a.	1	1	1	1	Anxa2
GO:0046223	BP	e	aflatoxin catabolic process	1/598	2/32695	0.0362	n.a.	1	1	1	1	Nfe2l2
GO:0042732	BP	e	D-xylose metabolic process	1/598	2/32695	0.0362	n.a.	1	1	1	1	Dcxr
GO:0035772	BP	e	interleukin-13-mediated signaling pathway	1/598	2/32695	0.0362	n.a.	1	1	1	1	Il13ra1
GO:0044818	BP	e	mitotic G2/M transition checkpoint	1/598	2/32695	0.0362	n.a.	1	1	1	1	Cdk5rap3
GO:0035847	BP	e	uterine epithelium development	1/598	2/32695	0.0362	n.a.	1	1	1	1	Cdh1
GO:0035710	BP	e	CD4-positive, alpha-beta T cell activation	1/598	2/32695	0.0362	n.a.	1	1	1	1	Rsad2
GO:0060837	BP	e	blood vessel endothelial cell differentiation	1/598	2/32695	0.0362	n.a.	1	1	1	1	Kdr
GO:1903609	BP	e	negative regulation of inward rectifier potassium channel activity	1/598	2/32695	0.0362	n.a.	1	1	1	1	Cav1
GO:1905602	BP	e	positive regulation of receptor-mediated endocytosis involved in cholesterol transport	1/598	2/32695	0.0362	n.a.	1	1	1	1	Anxa2
GO:0003430	BP	e	growth plate cartilage chondrocyte growth	1/598	2/32695	0.0362	n.a.	1	1	1	1	Tgfbr2
GO:1904172	BP	e	positive regulation of bleb assembly	1/598	2/32695	0.0362	n.a.	1	1	1	1	Anln
GO:2000194	BP	e	regulation of female gonad development	1/598	2/32695	0.0362	n.a.	1	1	1	1	Nupr1
GO:0061017	BP	e	hepatoblast differentiation	1/598	2/32695	0.0362	n.a.	1	1	1	1	Hhex
GO:0002192	BP	e	IRES-dependent translational initiation of linear mRNA	1/598	2/32695	0.0362	n.a.	1	1	1	1	Eif4ebp1
GO:0042496	BP	e	detection of diacyl bacterial lipopeptide	1/598	2/32695	0.0362	n.a.	1	1	1	1	Tlr2
GO:0042494	BP	e	detection of bacterial lipoprotein	1/598	2/32695	0.0362	n.a.	1	1	1	1	Ssc5d
GO:1902728	BP	e	positive regulation of growth factor dependent skeletal muscle satellite cell proliferation	1/598	2/32695	0.0362	n.a.	1	1	1	1	Stat3
GO:0009081	BP	e	branched-chain amino acid metabolic process	1/598	2/32695	0.0362	n.a.	1	1	1	1	Bcat2
GO:0009082	BP	e	branched-chain amino acid biosynthetic process	1/598	2/32695	0.0362	n.a.	1	1	1	1	Bcat2
GO:0070483	BP	e	detection of hypoxia	1/598	2/32695	0.0362	n.a.	1	1	1	1	Eng
GO:0014839	BP	e	myoblast migration involved in skeletal muscle regeneration	1/598	2/32695	0.0362	n.a.	1	1	1	1	Anxa1
GO:0042495	BP	e	detection of triacyl bacterial lipopeptide	1/598	2/32695	0.0362	n.a.	1	1	1	1	Tlr2
GO:0072166	BP	e	posterior mesonephric tubule development	1/598	2/32695	0.0362	n.a.	1	1	1	1	Osr1
GO:0036303	BP	e	lymph vessel morphogenesis	1/598	2/32695	0.0362	n.a.	1	1	1	1	Vegfa
GO:1905408	BP	e	negative regulation of creatine transmembrane transporter activity	1/598	2/32695	0.0362	n.a.	1	1	1	1	Osr1
GO:0003431	BP	e	growth plate cartilage chondrocyte development	1/598	2/32695	0.0362	n.a.	1	1	1	1	Col27a1
GO:2000405	BP	e	negative regulation of T cell migration	1/598	2/32695	0.0362	n.a.	1	1	1	1	Apod
GO:0097340	BP	e	inhibition of cysteine-type endopeptidase activity	1/598	2/32695	0.0362	n.a.	1	1	1	1	Cast
GO:0036413	BP	e	histone H3-R26 citrullination	1/598	2/32695	0.0362	n.a.	1	1	1	1	Padi2
GO:0060537	BP	e	muscle tissue development	1/598	2/32695	0.0362	n.a.	1	1	1	1	Srpk3
GO:0032607	BP	e	interferon-alpha production	1/598	2/32695	0.0362	n.a.	1	1	1	1	Irf7
GO:0045048	BP	e	protein insertion into ER membrane	1/598	2/32695	0.0362	n.a.	1	1	1	1	Tram2
GO:2000342	BP	e	negative regulation of chemokine (C-X-C motif) ligand 2 production	1/598	2/32695	0.0362	n.a.	1	1	1	1	Klf4
GO:0017004	BP	e	cytochrome complex assembly	1/598	2/32695	0.0362	n.a.	1	1	1	1	Cyba
GO:0061643	BP	e	chemorepulsion of axon	1/598	2/32695	0.0362	n.a.	1	1	1	1	Robo3
GO:0034164	BP	e	negative regulation of toll-like receptor 9 signaling pathway	1/598	2/32695	0.0362	n.a.	1	1	1	1	Rab7b
GO:2001186	BP	e	negative regulation of CD8-positive, alpha-beta T cell activation	1/598	2/32695	0.0362	n.a.	1	1	1	1	Hfe
GO:0000294	BP	e	nuclear-transcribed mRNA catabolic process, endonucleolytic cleavage-dependent decay	1/598	2/32695	0.0362	n.a.	1	1	1	1	Zc3h12a
GO:1905065	BP	e	positive regulation of vascular smooth muscle cell differentiation	1/598	2/32695	0.0362	n.a.	1	1	1	1	Eng
GO:0046416	BP	e	D-amino acid metabolic process	1/598	2/32695	0.0362	n.a.	1	1	1	1	Ddo
GO:0098711	BP	e	iron ion import across plasma membrane	1/598	2/32695	0.0362	n.a.	1	1	1	1	Hfe
GO:0046884	BP	e	follicle-stimulating hormone secretion	1/598	2/32695	0.0362	n.a.	1	1	1	1	Cga
GO:0007231	BP	e	osmosensory signaling pathway	1/598	2/32695	0.0362	n.a.	1	1	1	1	Osr1
GO:0007354	BP	e	zygotic determination of anterior/posterior axis, embryo	1/598	2/32695	0.0362	n.a.	1	1	1	1	Pcsk6
GO:0014734	BP	e	skeletal muscle hypertrophy	1/598	2/32695	0.0362	n.a.	1	1	1	1	Myoc
GO:0034124	BP	e	regulation of MyD88-dependent toll-like receptor signaling pathway	1/598	2/32695	0.0362	n.a.	1	1	1	1	Irf7
GO:0072592	BP	e	oxygen metabolic process	1/598	2/32695	0.0362	n.a.	1	1	1	1	Fmo2
GO:2001233	BP	e	regulation of apoptotic signaling pathway	1/598	2/32695	0.0362	n.a.	1	1	1	1	Casp8
GO:1903010	BP	e	regulation of bone development	1/598	2/32695	0.0362	n.a.	1	1	1	1	Kdr
GO:0002367	BP	e	cytokine production involved in immune response	1/598	2/32695	0.0362	n.a.	1	1	1	1	Mr1
GO:0033484	BP	e	nitric oxide homeostasis	1/598	2/32695	0.0362	n.a.	1	1	1	1	Cav1
GO:0071600	BP	e	otic vesicle morphogenesis	1/598	2/32695	0.0362	n.a.	1	1	1	1	Tbx1
GO:1902023	BP	e	L-arginine transport	1/598	2/32695	0.0362	n.a.	1	1	1	1	Slc11a1
GO:0003169	BP	e	coronary vein morphogenesis	1/598	2/32695	0.0362	n.a.	1	1	1	1	Vegfa
GO:1990428	BP	e	miRNA transport	1/598	2/32695	0.0362	n.a.	1	1	1	1	Tgfbr2
GO:0015825	BP	e	L-serine transport	1/598	2/32695	0.0362	n.a.	1	1	1	1	Slc1a5
GO:0008049	BP	e	male courtship behavior	1/598	2/32695	0.0362	n.a.	1	1	1	1	Hexb
GO:0072190	BP	e	ureter urothelium development	1/598	2/32695	0.0362	n.a.	1	1	1	1	Osr1
GO:0033197	BP	e	response to vitamin E	1/598	2/32695	0.0362	n.a.	1	1	1	1	Eif2ak2
GO:0006528	BP	e	asparagine metabolic process	1/598	2/32695	0.0362	n.a.	1	1	1	1	Aspg
GO:0032765	BP	e	positive regulation of mast cell cytokine production	1/598	2/32695	0.0362	n.a.	1	1	1	1	Fcer1g
GO:1904684	BP	e	negative regulation of metalloendopeptidase activity	1/598	2/32695	0.0362	n.a.	1	1	1	1	Reck
GO:1901534	BP	e	positive regulation of hematopoietic progenitor cell differentiation	1/598	2/32695	0.0362	n.a.	1	1	1	1	Foxc1
GO:1904237	BP	e	positive regulation of substrate-dependent cell migration, cell attachment to substrate	1/598	2/32695	0.0362	n.a.	1	1	1	1	Fbln1
GO:0009258	BP	e	10-formyltetrahydrofolate catabolic process	1/598	2/32695	0.0362	n.a.	1	1	1	1	Aldh1l2
GO:0070434	BP	e	positive regulation of nucleotide-binding oligomerization domain containing 2 signaling pathway	1/598	2/32695	0.0362	n.a.	1	1	1	1	Tlr4
GO:2000256	BP	e	positive regulation of male germ cell proliferation	1/598	2/32695	0.0362	n.a.	1	1	1	1	Il18
GO:0071918	BP	e	urea transmembrane transport	1/598	2/32695	0.0362	n.a.	1	1	1	1	Slc14a1
GO:1904434	BP	e	positive regulation of ferrous iron binding	1/598	2/32695	0.0362	n.a.	1	1	1	1	Hfe
GO:0032701	BP	e	negative regulation of interleukin-18 production	1/598	2/32695	0.0362	n.a.	1	1	1	1	Cd84
GO:0032707	BP	e	negative regulation of interleukin-23 production	1/598	2/32695	0.0362	n.a.	1	1	1	1	Tlr4
GO:0061518	BP	e	microglial cell proliferation	1/598	2/32695	0.0362	n.a.	1	1	1	1	Il33
GO:1904437	BP	e	positive regulation of transferrin receptor binding	1/598	2/32695	0.0362	n.a.	1	1	1	1	Hfe
GO:0072111	BP	e	cell proliferation involved in kidney development	1/598	2/32695	0.0362	n.a.	1	1	1	1	Osr1
GO:0010255	BP	e	glucose mediated signaling pathway	1/598	2/32695	0.0362	n.a.	1	1	1	1	Mlxipl
GO:2000473	BP	e	positive regulation of hematopoietic stem cell migration	1/598	2/32695	0.0362	n.a.	1	1	1	1	Ptprc
GO:1902524	BP	e	positive regulation of protein K48-linked ubiquitination	1/598	2/32695	0.0362	n.a.	1	1	1	1	Nmi
GO:0042488	BP	e	positive regulation of odontogenesis of dentin-containing tooth	1/598	2/32695	0.0362	n.a.	1	1	1	1	Csf1
GO:0042489	BP	e	negative regulation of odontogenesis of dentin-containing tooth	1/598	2/32695	0.0362	n.a.	1	1	1	1	Tnfrsf11b
GO:0009098	BP	e	leucine biosynthetic process	1/598	2/32695	0.0362	n.a.	1	1	1	1	Bcat2
GO:0009099	BP	e	valine biosynthetic process	1/598	2/32695	0.0362	n.a.	1	1	1	1	Bcat2
GO:0010665	BP	e	regulation of cardiac muscle cell apoptotic process	1/598	2/32695	0.0362	n.a.	1	1	1	1	Eng
GO:0002431	BP	e	Fc receptor mediated stimulatory signaling pathway	1/598	2/32695	0.0362	n.a.	1	1	1	1	Fcer1g
GO:1990166	BP	e	protein localization to site of double-strand break	1/598	2/32695	0.0362	n.a.	1	1	1	1	Parp3
GO:0086098	BP	e	angiotensin-activated signaling pathway involved in heart process	1/598	2/32695	0.0362	n.a.	1	1	1	1	Cav1
GO:0006083	BP	e	acetate metabolic process	1/598	2/32695	0.0362	n.a.	1	1	1	1	Aspa
GO:1903691	BP	e	positive regulation of wound healing, spreading of epidermal cells	1/598	2/32695	0.0362	n.a.	1	1	1	1	Rreb1
GO:0042693	BP	e	muscle cell fate commitment	1/598	2/32695	0.0362	n.a.	1	1	1	1	Tbx1
GO:0016098	BP	e	monoterpenoid metabolic process	1/598	2/32695	0.0362	n.a.	1	1	1	1	Cyp2e1
GO:0023057	BP	e	negative regulation of signaling	1/598	2/32695	0.0362	n.a.	1	1	1	1	Mvp
GO:0090362	BP	e	positive regulation of platelet-derived growth factor production	1/598	2/32695	0.0362	n.a.	1	1	1	1	Ptgs2
GO:0006601	BP	e	creatine biosynthetic process	1/598	2/32695	0.0362	n.a.	1	1	1	1	Gatm
GO:2001150	BP	e	positive regulation of dipeptide transmembrane transport	1/598	2/32695	0.0362	n.a.	1	1	1	1	Car2
GO:0002711	BP	e	positive regulation of T cell mediated immunity	1/598	2/32695	0.0362	n.a.	1	1	1	1	Ptprc
GO:0038190	BP	e	VEGF-activated neuropilin signaling pathway	1/598	2/32695	0.0362	n.a.	1	1	1	1	Vegfa
GO:0032902	BP	e	nerve growth factor production	1/598	2/32695	0.0362	n.a.	1	1	1	1	Pcsk6
GO:0034198	BP	e	cellular response to amino acid starvation	3/598	40/32695	0.0365	n.a.	3	1	1	1	Atf3, Dap, Eif2ak2
GO:0045931	BP	e	positive regulation of mitotic cell cycle	3/598	40/32695	0.0365	n.a.	3	1	1	1	Eif4ebp1, Sphk1, Tal1
GO:0048469	BP	e	cell maturation	3/598	40/32695	0.0365	n.a.	3	1	1	1	Kdr, Pou2f2, Vegfa
GO:0032526	BP	e	response to retinoic acid	3/598	40/32695	0.0365	n.a.	3	1	1	1	Ctsh, Klf4, Runx1
GO:2001222	BP	e	regulation of neuron migration	2/598	17/32695	0.0379	n.a.	2	1	1	1	Cdh1, Shtn1
GO:0045579	BP	e	positive regulation of B cell differentiation	2/598	17/32695	0.0379	n.a.	2	1	1	1	Inpp5d, Nckap1l
GO:0046697	BP	e	decidualization	2/598	17/32695	0.0379	n.a.	2	1	1	1	Cdh1, Ptgs2
GO:0035584	BP	e	calcium-mediated signaling using intracellular calcium source	2/598	17/32695	0.0379	n.a.	2	1	1	1	Kdr, Ptgfr
GO:0046889	BP	e	positive regulation of lipid biosynthetic process	2/598	17/32695	0.0379	n.a.	2	1	1	1	Mlxipl, Sirt4
GO:0007250	BP	e	activation of NF-kappaB-inducing kinase activity	2/598	17/32695	0.0379	n.a.	2	1	1	1	Card10, Tlr4
GO:0048873	BP	e	homeostasis of number of cells within a tissue	3/598	41/32695	0.0389	n.a.	3	1	1	1	Csf1, Nos3, Vegfa
GO:0043407	BP	e	negative regulation of MAP kinase activity	3/598	41/32695	0.0389	n.a.	3	1	1	1	Cav1, Cdk5rap3, Irak3
GO:0030182	BP	e	neuron differentiation	6/598	136/32695	0.0393	n.a.	6	1	1	1	Aldh1a2, Btg2, Edn3, Nrbp2, Runx1, Tal1
GO:0002250	BP	e	adaptive immune response	6/598	137/32695	0.0405	n.a.	6	1	1	1	Anxa1, Cd84, Cd86, Lat2, Ly9, Unc93b1
GO:0051216	BP	e	cartilage development	4/598	71/32695	0.0412	n.a.	4	1	1	1	Col11a2, Edn1, Mgp, Tgfbr2
GO:0010718	BP	e	positive regulation of epithelial to mesenchymal transition	3/598	42/32695	0.0413	n.a.	3	1	1	1	Foxc1, Glipr2, Tgfbr2
GO:0043124	BP	e	negative regulation of I-kappaB kinase/NF-kappaB signaling	3/598	42/32695	0.0413	n.a.	3	1	1	1	Casp8, Pycard, Zc3h12a
GO:0042267	BP	e	natural killer cell mediated cytotoxicity	2/598	18/32695	0.0421	n.a.	2	1	1	1	Hfe, Il18
GO:0033160	BP	e	positive regulation of protein import into nucleus, translocation	2/598	18/32695	0.0421	n.a.	2	1	1	1	Tmem173, Tnfrsf1a
GO:0000266	BP	e	mitochondrial fission	2/598	18/32695	0.0421	n.a.	2	1	1	1	Mx1, Mx2
GO:0007095	BP	e	mitotic G2 DNA damage checkpoint	2/598	18/32695	0.0421	n.a.	2	1	1	1	Cdk5rap3, D7Ertd443e
GO:0042176	BP	e	regulation of protein catabolic process	2/598	18/32695	0.0421	n.a.	2	1	1	1	Samd9l, Serpinb1a
GO:0050965	BP	e	detection of temperature stimulus involved in sensory perception of pain	2/598	18/32695	0.0421	n.a.	2	1	1	1	Cxcl12, Tlr4
GO:0050868	BP	e	negative regulation of T cell activation	2/598	18/32695	0.0421	n.a.	2	1	1	1	Gpnmb, Lag3
GO:0001953	BP	e	negative regulation of cell-matrix adhesion	2/598	18/32695	0.0421	n.a.	2	1	1	1	Jag1, Myoc
GO:0033198	BP	e	response to ATP	2/598	18/32695	0.0421	n.a.	2	1	1	1	P2rx4, Plcg2
GO:0035855	BP	e	megakaryocyte development	2/598	18/32695	0.0421	n.a.	2	1	1	1	Tal1, Vps33b
GO:0051781	BP	e	positive regulation of cell division	3/598	43/32695	0.0438	n.a.	3	1	1	1	Il1a, Tal1, Vegfa
GO:0042130	BP	e	negative regulation of T cell proliferation	3/598	43/32695	0.0438	n.a.	3	1	1	1	Cd86, Gpnmb, H2-M3
GO:0006836	BP	e	neurotransmitter transport	3/598	43/32695	0.0438	n.a.	3	1	1	1	Slc6a12, Slc6a13, Slc6a20a
GO:0097191	BP	e	extrinsic apoptotic signaling pathway	3/598	43/32695	0.0438	n.a.	3	1	1	1	Casp8, Il33, Tnfrsf1b
GO:0043010	BP	e	camera-type eye development	4/598	73/32695	0.0449	n.a.	4	1	1	1	Aldh1a2, Cryab, Foxc1, Jag1
GO:0065003	BP	e	protein-containing complex assembly	4/598	73/32695	0.0449	n.a.	4	1	1	1	Mgp, Nckap1l, Nupr1, Pf4
GO:0006401	BP	e	RNA catabolic process	2/598	19/32695	0.0465	n.a.	2	1	1	1	Isg20, Oas2
GO:0070208	BP	e	protein heterotrimerization	2/598	19/32695	0.0465	n.a.	2	1	1	1	Col6a1, Col6a2
GO:0042789	BP	e	mRNA transcription by RNA polymerase II	2/598	19/32695	0.0465	n.a.	2	1	1	1	C5ar1, Stat3
GO:2000251	BP	e	positive regulation of actin cytoskeleton reorganization	2/598	19/32695	0.0465	n.a.	2	1	1	1	Fes, Hck
GO:0032956	BP	e	regulation of actin cytoskeleton organization	4/598	74/32695	0.0468	n.a.	4	1	1	1	Arhgap18, Il1a, Myo1f, Rhoj
GO:0007169	BP	e	transmembrane receptor protein tyrosine kinase signaling pathway	5/598	107/32695	0.0469	n.a.	5	1	1	1	Csf1, Csf1r, Fes, Hck, Kdr
GO:0060395	BP	e	SMAD protein signal transduction	4/598	75/32695	0.0487	n.a.	4	1	1	1	Atoh8, Hexa, Trf, Vim
GO:0032147	BP	e	activation of protein kinase activity	4/598	75/32695	0.0487	n.a.	4	1	1	1	Oxsr1, Slc11a1, Tgfbr2, Vegfa
GO:0007265	BP	e	Ras protein signal transduction	3/598	45/32695	0.0491	n.a.	3	1	1	1	Plce1, Rasgrp3, Shtn1
GO:0030890	BP	e	positive regulation of B cell proliferation	3/598	45/32695	0.0491	n.a.	3	1	1	1	Nckap1l, Ptprc, Tlr4
GO:0071300	BP	e	cellular response to retinoic acid	3/598	45/32695	0.0491	n.a.	3	1	1	1	Aldh1a2, Osr1, Tbx1
GO:0007608	BP	p	sensory perception of smell	0/598	1114/32695	9.64e-07	n.a.	0	0.0114	0.0112	0.0114
GO:0007283	BP	p	spermatogenesis	1/598	413/32695	0.00836	n.a.	1	1	1	1	Mlh1
GO:0008150	BP	p	biological_process	61/598	4370/32695	0.0211	n.a.	61	1	1	1	1600023N17Rik, AB124611, Adamtsl3, Apold1, Asb11, Bcas1, Cbln3, Cdh19, Clasrp, Cped1, Etnppl, Fam183b, Fbxw15, Firre, Gm14005, Gm5086, Gpr108, Hrct1, Hs3st3a1, Hspa12b, I830077J02Rik, Itpripl2, Lca5l, Leng8, Lhfp, Lipo1, Lrrc25, Lrrc36, Ly6g6f, Mboat1, Mdrl, Ms4a6d, Ms4a7, Olfml1, Olfml3, Parp12, Parvg, Plekha4, Plekhn1, Plekho2, Pnisr, Prickle3, Prr18, Prrg1, Rcn3, Sec14l5, Slamf9, Slc46a3, Slfn…
GO:0050896	BP	p	response to stimulus	0/598	208/32695	0.0361	n.a.	0	1	1	1
