# Supplementary material for: Dietary Restriction and Rapamycin Affect Brain Aging in Mice by Attenuating Age-Related DNA Methylation Changes
Source: Genes (Basel). 2022 Apr 15;13(4):699. doi: 10.3390/genes13040699 (PMC9030181; doi:10.3390/genes13040699)
Supplement: Supplementary file 1 [file genes-13-00699-s001.zip › Table S4 - Expression of DR-RALL-ameliorated-DEGs.xlsx]

## Sheet: overlap_amelior_ODEGs
GeneSymbol	young_avg	old_avg	DR_avg	RALL_avg	RDRL_avg
Olfml1	6.927	8.57	7.55	8.23	7.48
Cd109	1.179	1.501	1.307	1.328	1.19
Olfml3	14.8	18.76	16.12	17.02	16.13
Serpinf1	7.35	10.07	8.823	9.657	7.527
Ssh3	4.797	6.383	4.17	4.863	5.807
Clasrp	8.45	11.08	7.923	7.843	9.967
Mir124a-1hg	11.18	13.47	9.203	9.6	12.64
Irf8	1.707	3.377	2.315	3.025	3.863
H2-M3	1.157	1.921	1.261	1.796	2.133
Hs3st3a1	0.242	0.4163	0.381	0.3212	0.3044
Slc39a8	0.9877	1.415	1.262	1.227	1.095
Dap	3.933	5.237	4.393	4.92	4.587
Slamf9	0.6923	1.785	0.9727	1.426	1.391
Plekhn1	1.454	2.211	1.319	1.433	1.591
Cyth4	5.79	8.197	6.873	7.37	7.967
Rnf213	0.6053	1.508	1.001	0.9127	0.6367
Xist	21.12	29.91	20.3	22.78	21.4
Snx1	29.75	35.37	30.77	31	34.33
Arap3	2.38	3.245	2.606	2.843	2.741
Cx3cr1	15.32	21.32	20.17	16.92	17.96
Snx9	4.227	5.55	4.787	5.38	4.737
Dlk1	3.387	4.323	3.84	3.21	4.413
Lrrc25	0.4507	0.8487	0.5197	0.7923	1.042
Mlph	0.5677	0.926	0.8357	0.6953	0.8443
Nipal4	1.282	1.779	1.48	1.214	1.418
C3ar1	1.24	2.144	1.376	1.852	1.823
Mx2	0.1411	0.4063	0.1649	0.3056	0.1888
Mx1	0.1163	0.3723	0.1491	0.2024	0.2029
AK148054	18.77	38.73	22.42	25.77	29.07
Apln	6.867	8.84	6.92	8.633	8.003
Rasa4	0.6857	1.168	0.9057	0.8247	1.314
Thrsp	32.23	44.4	38.07	41.97	39.63
Hexa	26.65	32.18	27.49	30.21	31.11
Ftx	2.277	3.228	2.088	2.359	2.944
Hexb	64.5	85.47	79.57	74.8	78.5
Ly6g6f	0.448	0.827	0.361	0.2874	0.3957
Firre	9.61	13.96	9.57	9.45	11.23
Slc22a6	1.034	2.121	2.022	1.825	1.279
C5ar1	0.3977	0.6913	0.566	0.61	0.605
C4b	22.1	54.27	40.23	37.23	39.7
Grn	26.53	31.76	28.92	30.46	30.76
Hck	0.822	1.356	0.9833	1.293	1.764
Wipf1	3.773	4.953	4.493	4.297	4.633
Foxd1	0.3733	0.605	0.6043	0.551	0.4687
Rab7b	0.3249	0.565	0.2589	0.3993	0.3477
Btg2	5.743	7.413	6.217	5.7	6.06
Skap2	6.973	9.07	7.55	7.287	8.14
Ube2l6	2.452	3.767	2.795	3.723	3.73
Lyz2	16.03	45.43	19.72	34.53	38.4
Pik3ap1	0.9887	1.65	1.258	1.548	1.605
Capg	2.247	5.057	3.196	4.02	4.323
Mvp	3.059	4.197	3.49	4.083	3.917
Adcy7	0.696	0.9663	0.7237	0.8757	0.8323
Stat3	12.7	15.47	14.2	15.08	15.42
Cxcl13	0.05243	1.105	0.1194	1.104	5.58
Pan2	3.148	4.067	2.96	3.383	3.347
Elovl1	6.213	8.053	6.83	7.09	7.717
Lag3	3.933	7.663	6.217	6.617	7.83
Tmem88b	24.38	29.9	22.89	25.21	23.41
Osmr	1.682	2.807	2.63	2.557	2.363
Klk6	4.063	10.54	4.877	4.957	5.203
Apold1	1.494	3.211	2.859	2.386	2.492
Gng11	10.39	13.57	11.73	12.28	13.2
Parp3	1.73	5.79	4.06	2.863	3.185
Jag1	1.342	1.687	1.421	1.444	1.317
Renbp	1.497	2.436	1.778	2.136	2.137
Il18	12.17	15.71	13.2	13.87	15.02
Ptgfr	0.2072	0.372	0.3363	0.2851	0.2615
Cxcl5	0.5283	1.193	0.8563	1.1	1.06
Dmpk	2.487	3.433	2.927	3.312	2.905
Lipo1	1.942	2.805	2.359	2.563	2.348
Prr5l	2.948	4.057	3.072	3.323	3.001
P2rx4	3.713	5.323	3.693	4.07	5.393
Sepp1	135.6	162	140.6	142.9	141.9
Pmp22	11.82	17.42	14.56	13.13	16.07
Mlxipl	0.471	0.8417	0.5723	0.5833	0.6073
AK181808	11.02	23.49	14.26	14.68	16.61
Plcg2	1.104	1.832	1.408	1.533	1.972
Tns2	4.4	5.847	5.207	5.49	4.74
Aif1	5.5	11.31	7.82	10.54	11.19
Tnfsf10	0.422	0.7593	0.6053	0.7087	0.9413
Itpripl2	1.385	1.793	1.668	1.692	1.462
Prrg1	2.014	2.615	2.14	2.229	2.352
Lcn2	0.6517	4.083	1.234	3.757	1.392
Vwa5a	4.947	6.353	5.82	5.69	5.827
Evc	2.059	2.839	2.326	2.434	2.456
Csf1r	28.74	34.73	33.97	32.09	33.27
Bicc1	1.217	1.852	1.755	1.581	1.294
Lgi4	12.22	14.95	13.28	12.8	13.39
Lca5l	0.3049	0.4873	0.2963	0.3617	0.343
Fxyd5	6.077	9.093	7.637	8.957	9.617
Hba-a2	107.9	184.2	149	165.4	132.7
Serpinb1a	3.953	5.677	5.003	4.517	5.397
Phldb1	22.82	27.76	21.19	23.4	22.91
Adssl1	7.17	9.5	8.503	7.23	8.84
S100a6	14.15	24.54	19.04	22.3	24.46
Trim34a	0.5287	1.106	0.769	0.9443	0.9117
Hlx	0.3252	0.611	0.363	0.3927	0.4943
Gpr182	1.124	2.741	2.321	2.708	2.025
Anln	10.07	13.92	11.27	10.95	11.19
Slfn8	0.2945	0.5687	0.4033	0.5437	0.7213
Gm16551	0.2218	0.444	0.3383	0.3963	0.615
Zc3hav1	1.609	2.87	2.585	2.438	2.363
Igfbp6	8.983	11.57	10.59	9.933	11.11
Ifit3	3.185	9.3	5.03	7.923	7.423
Ifit2	2.262	3.265	2.469	2.953	2.949
Ifit1	1.076	2.865	1.443	2.511	2.177
Shtn1	10.51	13.55	9.743	11.76	11
Mr1	2.215	3.075	2.595	2.766	2.545
Catip	0.6237	0.9197	0.5663	0.6897	0.6437
Tmem176a	10.88	14.81	11.91	13.47	13.73
Tmem176b	26.88	36.17	32.21	35.07	35.7
Glipr2	1.424	2.288	1.959	2.252	2.23
Acvrl1	3.36	4.36	3.733	4.18	3.993
Slfn5	1.496	2.201	1.498	2.164	1.699
Ctnnal1	3.35	4.24	3.143	4.05	3.006
C1qc	42.8	68.73	54.33	65.93	65.03
C1qb	49.57	86.77	61.37	79.87	77.23
C1qa	50.23	86.3	64.43	85.8	81.7
Klhl6	0.646	1.112	0.7793	1.007	0.861
Appl2	19.18	25.02	20.74	21.63	22.4
Emp1	0.912	1.678	1.341	1.645	1.369
Dennd1c	0.2509	0.6047	0.2958	0.499	0.5543
Rps10	199.7	217.1	206.6	211.3	227.3
Tmem37	0.8947	1.58	1.048	1.479	1.194
Cbln3	0.1559	0.5613	0.0918	0.1346	0.1083
Nkx2-9	0.2427	0.57	0.3215	0.3238	0.522
Slc47a1	0.1988	0.5923	0.4477	0.4067	0.3787
Gpr34	6.683	10.98	10.61	8.52	10.15
Scn7a	0.6723	0.9307	0.8563	0.6943	0.8347
Spi1	2.075	3.48	2.386	3.373	3.181
Apbb1ip	2.448	3.57	2.979	2.782	3.02
Il4ra	1.009	1.348	1.156	1.325	1.859
Unc93b1	7.04	10.39	8.107	9.65	11.05
Rsad2	0.433	1.108	0.5047	0.881	0.699
Ubxn11	2.182	2.983	2.337	2.89	2.55
Apod	87.2	161.5	137.9	138.2	137
Cdh19	2.434	3.194	2.516	2.641	2.314
Csf1	7.2	9.577	8.76	8.06	8.787
Oma1	2.446	3.222	2.701	2.78	3.009
Samsn1	0.533	1.079	0.4887	0.9627	0.9593
Asap3	0.7043	0.996	0.6773	0.8193	0.6553
Anxa1	0.5567	1.399	1.158	1.314	1.202
E4f1	4.29	5.593	3.9	4.373	5.303
Anxa3	6.917	11.56	8.88	9.423	11.02
Anxa2	6.95	13.42	10.13	12.06	10.67
Anxa5	25.54	33.47	31.21	31.21	30.34
Anxa4	2.228	3.423	2.758	3.238	2.893
Cldn14	0.2912	0.5247	0.2107	0.3292	0.3413
Cstb	28.33	35.43	33.1	34.27	35.77
Sfi1	9.063	14.55	10.21	9.947	11.67
Irf9	3.407	5.087	3.69	5.07	4.553
Cldn19	0.2015	0.4227	0.2885	0.2887	0.284
Pisd-ps2	14.79	23.7	17.47	15.01	20.2
Klhl4	3.93	4.927	4.093	4.21	4.097
Pisd-ps1	31.81	53.47	38.47	34.53	45.6
Mgp	26.92	60.67	49.67	60.2	36.53
Spp1	7.627	18.43	13.57	15.01	11.02
Car13	0.3288	0.6847	0.5787	0.565	0.4883
Atf3	0.8	1.532	1.154	1.199	1.19
Bcas1	61.1	90.5	62.77	78.93	72.17
Sult1c1	0.2378	0.8163	0.3637	0.537	0.1682
Gstt3	1.468	2.201	2.152	1.687	2.177
Slc11a1	0.9737	1.939	1.289	1.566	1.878
Thbs2	0.9113	1.229	1.201	1.146	0.9963
Cdk5rap3	8.043	12.41	10.15	12.1	11.96
Slc46a3	2.317	3.194	2.749	2.94	2.833
Ptgs2	4.997	6.38	5.863	5.863	5.68
Dock8	0.7253	1.075	0.9557	1.032	1.023
Inpp5d	2.728	3.667	3.313	3.503	3.34
Cfh	5.433	9.143	8.003	8.927	8.067
Enpp6	2.313	3.159	2.134	2.542	2.15
Prl	2.68	27.38	0.04433	21.14	0.03248
Gpnmb	2.224	4.457	2.882	3.096	2.79
Cd9	39.63	54.67	42.97	50.93	43.3
Lpcat2	3.49	4.91	4.28	4.783	4.707
Il33	26.33	38.6	31.05	28.07	30.03
Cd22	0.181	0.3963	0.302	0.3463	1.328
Plekho2	2.51	3.377	2.689	2.784	2.889
Clec14a	0.741	1.112	0.9227	1.111	0.939
Cd180	0.961	2.06	1.371	1.458	1.479
Cst7	1.713	4.38	1.944	3.268	2.538
Asb11	0.457	0.9253	0.5957	0.653	0.7517
Aspg	0.7823	2.614	1.585	2.048	2.027
Aspa	8.363	12.75	9.44	9.837	10.97
Eng	7.37	9.353	9.007	9.053	8.063
Wisp1	0.1718	0.721	0.1756	0.2809	0.3235
Dmp1	2.263	3.18	2.672	2.886	2.727
Plekha4	0.414	0.9167	0.3198	0.5537	0.7787
Cd14	1.233	2.465	1.646	2.103	2.163
Tlr13	0.7223	1.177	0.9547	1.166	0.9607
Flnb	4.903	6.353	5.473	5.69	5.43
Flnc	0.6387	1.21	0.86	0.905	0.723
Lum	1.827	2.827	2.55	2.776	2.127
Eif2ak2	1.222	1.932	1.588	1.925	1.771
Gm10863	0.7417	1.477	0.591	0.9863	0.7617
Ptprc	0.7773	1.527	0.9627	1.453	2.148
Prr18	16.12	19.95	16.6	17.09	16.98
Tgm1	0.1316	0.3723	0.1846	0.2617	0.203
Kazald1	1.259	1.825	1.683	1.344	1.942
Oasl2	1.444	3.727	1.939	3.703	3.129
Cercam	1.346	1.957	1.323	1.265	1.515
Tbx1	0.3683	0.6023	0.5143	0.339	0.454
Tnfrsf11b	0.2083	0.5133	0.4507	0.4557	0.464
I830077J02Rik	0.3266	0.6083	0.2193	0.4473	0.3573
Fblim1	0.2987	0.8453	0.5493	0.742	0.5813
Ptges	0.7307	1.062	0.9887	0.9727	0.9527
Tor4a	1.203	1.71	1.303	1.662	1.456
Reep4	0.7303	1.155	0.8863	0.8303	0.8923
Ggta1	1.531	2.604	2.117	2.505	2.224
Samd9l	0.747	1.622	1.253	1.337	1.328
Plpp2	1.91	3.088	2.455	2.447	2.602
Dhx58	0.386	0.7547	0.462	0.631	0.6963
Sirt4	3.697	4.943	3.208	3.723	4.66
Sox13	1.718	2.347	1.97	2.087	1.998
Hspb8	10.06	12.41	11.82	12.22	11.11
Vim	33.57	60.93	47.23	55.9	52.27
Adap2	1.682	2.318	1.807	1.918	1.756
Gltp	25.64	32.13	28.61	27.87	28.02
Myoc	11.53	15.69	14.29	12.58	13.33
Gpr84	0.6573	1.742	1.147	1.129	1.09
Dnase2a	1.87	2.718	1.999	2.635	2.053
Snhg11	56.93	72.2	47.43	46.6	65.6
Vtn	38.03	54.03	53.87	52.3	44.23
Vps33b	4.347	6.763	4.637	5.48	4.953
Fam129b	8.207	10.83	9.39	10.61	9.42
Hcls1	2.279	4.003	2.787	3.58	3.94
Gfap	218.7	381.7	295.5	315.7	314.7
Clic4	26	31.52	26.64	28.63	26.11
Bdkrb2	0.2698	0.515	0.2741	0.2588	0.3633
Arpc1b	8.207	11.75	9	11.6	11.99
Litaf	9.48	12.42	9.637	11.02	11.08
Pros1	4.597	6.67	5.923	6.237	6.313
Gpsm3	1.327	1.939	1.732	1.909	2.285
Pnisr	19.08	23.71	16.45	18.39	21.29
Itpr3	0.4977	0.724	0.6207	0.6633	0.5767
Dusp12	6.667	8.647	6.763	7.59	7.58
Vamp5	0.9593	1.558	1.31	1.418	1.708
Crlf2	6.387	8.813	7.137	7.507	9.737
Usp18	0.7613	1.819	0.812	1.432	1.352
P2ry6	1.69	2.86	2.227	2.454	2.277
Leng8	15.56	19.3	12.86	13.99	15.89
Fcer1g	15.29	23.1	17.87	21.24	22.78
AK019375	0.1087	0.3647	0.2074	0.312	0.1487
Clec7a	1.185	2.896	1.362	2.295	1.869
Il21r	0.6713	1.081	0.8633	1.018	1.194
Sec14l5	2.168	3.453	2.282	2.246	2.152
Magt1	4.903	6.66	5.083	5.26	4.85
AK141565	0.2762	0.474	0.3331	0.431	0.3937
Myl12a	20.31	22.95	21.8	22.69	24.23
Fmo5	0.885	1.167	1.051	1.072	0.9917
Tfcp2l1	0.7427	1.194	1.06	1.052	0.9833
Etnppl	4.903	6.33	6.03	5.55	5.407
Cyp27a1	1.156	2.166	1.351	1.658	1.918
Mboat1	0.76	1.285	0.7093	0.8097	1.03
Ptgds	567	1160	1020	1062	716.7
Rasal3	0.7217	1.26	0.9	1.059	1.144
Fyco1	5.58	7.173	5.86	6.083	5.793
Arhgap18	1.347	1.775	1.601	1.577	1.532
Adamtsl3	0.2362	0.448	0.3597	0.3363	0.3623
Adamtsl4	2.262	3.84	2.754	2.703	2.703
Ssc5d	0.2822	0.4777	0.3152	0.3827	0.36
Cd151	10.96	13.51	12.86	13.45	12.81
Lhfp	6.767	8.84	8.537	8.677	8.457
Akr1b8	0.5913	1.158	0.8833	0.9253	1.021
Cdh1	0.3301	0.8163	0.5587	0.5943	0.4703
Itgax	0.4467	1.212	0.691	0.8067	0.7753
Ranbp3l	1.325	2.053	1.773	1.94	1.53
Lat2	0.8873	1.821	1.143	1.428	1.865
Cdc42ep2	6.06	8.02	6.38	6.323	6.797
Cdc42ep1	8.07	9.757	7.92	8.193	8.003
Cdc42ep5	0.532	0.949	0.8553	0.6573	0.739
Col6a1	2.541	4.023	3.303	2.502	4.297
Slc1a5	0.4877	0.8537	0.6683	0.8093	0.9493
Col6a3	0.2616	0.4537	0.3733	0.3817	0.3219
Sp100	0.9077	1.635	1.003	1.627	1.521
Nckap1l	2.619	3.837	3.263	3.37	3.56
Cd48	0.783	1.48	1.203	1.257	1.51
Man2b1	10.77	13.7	12.98	12.32	12.57
Gjb1	9.493	14.13	11.09	10.75	11.05
Cd44	1.396	2.115	1.745	1.653	2.026
Crot	10.38	12.45	11.22	12.43	11.82
Gjb2	3.937	7.523	6.667	6.783	5.84
AK038603	0.5103	0.8357	0.4493	0.624	0.5007
Neurl3	0.5047	0.8693	0.526	0.8297	0.8703
Pnpla7	4.737	5.953	4.303	5.403	5.33
Gpr160	0.3623	0.6857	0.4757	0.5293	0.4717
Hapln2	7.57	12.51	8.537	7.987	8.693
C030029H02Rik	1.341	1.838	1.363	1.496	1.61
Pdlim2	8.723	10.91	8.073	9.26	9
Gatm	50.87	64.2	55.6	56.93	61.57
Slc6a13	3.907	7.417	6.83	7.247	5.03
Slc6a12	0.457	1.074	0.6923	0.8317	0.5553
Cped1	0.7243	1.187	1.15	1.061	0.741
Fyb	3.963	5.037	4.327	4.93	5.067
Reck	1.869	2.645	2.5	2.585	1.933
Spaca6	2.731	4.407	4.327	3.09	4.423
Aldh1l2	1.058	1.599	1.201	1.215	1.254
Card10	1.422	2.071	1.954	1.878	1.873
Pcsk6	6.863	8.53	7.987	7.213	7.313
AF251705	2.45	3.74	2.705	3.613	4.067
Rhoj	1.815	2.641	1.887	2.562	1.648
Lair1	1.606	2.416	1.897	2.15	2.351
Aldh1a2	2.728	6.903	5.677	5.55	4.793
Steap3	2.354	3.255	2.793	2.924	2.644
Plek	3.331	5.483	4.043	4.75	4.837
Csf2ra	4.24	5.66	3.73	3.903	4.957
Efemp1	4.36	8.807	8.103	8.013	7.377
Col27a1	0.5007	0.728	0.4447	0.6473	0.626
Slc16a11	2.99	4.07	3.078	3.208	3.843
AB124611	0.2052	0.4427	0.2601	0.4267	1.019
Pou2f2	0.877	1.273	0.8557	1.093	1.262
Ifi44	0.1754	0.5763	0.2362	0.5103	0.3867
Fbxw15	0.5157	1.145	0.4437	0.8337	0.5337
Myzap	0.171	0.459	0.3543	0.321	0.3003
Tbx18	0.4027	0.6773	0.6413	0.6147	0.4567
Fth1	1158	1467	1354	1328	1356
Maff	0.7617	1.437	1.334	1.383	1.239
Ly86	10.72	17.23	14.82	16.02	18.32
Lsp1	0.8717	2.198	1.847	2.162	3.306
Lpin3	0.2458	0.451	0.2517	0.3447	0.2445
Ccl3	0.622	2.063	1.056	1.17	1.344
AK089125	1.548	2.715	1.901	2.143	1.607
Parp12	2.459	3.76	2.82	3.643	3.547
Lgals9	4	6.067	4.543	5.76	5.263
Themis2	0.3913	0.6803	0.4997	0.5807	0.9763
Ddo	3.2	4.337	3.059	3.88	3.683
Irak3	0.3893	0.6917	0.3081	0.431	0.382
Foxc1	1.267	1.763	1.597	1.623	1.335
Lgals4	0.3717	0.7263	0.403	0.5487	0.6223
Dcn	27.47	34.13	29.92	30.21	36.27
Mrc1	0.494	0.9867	0.74	0.9723	0.7357
Mrc2	1.051	1.728	1.631	1.574	1.442
Qdpr	136.4	163.6	137.7	148.8	149.7
Hspa12b	1.911	2.64	1.966	2.582	2.332
Oas2	0.188	0.562	0.2755	0.4107	0.3697
Plce1	1.724	2.119	2.063	2.05	1.853
Itgam	5.98	8.05	7.453	7.123	7.7
Sned1	0.68	1.264	1.013	1.089	0.6533
Srpk3	0.6913	1.117	0.589	0.7587	0.8497
Nmi	1.73	2.811	1.896	2.572	2.554
Ncf2	0.783	1.181	1.083	1.099	1.111
Ccl6	1.143	2.297	1.545	2.012	2.384
Nfe2l2	7.327	10.36	8.82	9.493	9.457
Ifit3b	2.347	6.76	3.763	5.6	5.227
Plekhb1	183.1	230.7	199.2	205.5	206
Stxbp3	5.557	7.153	5.877	6.71	6.883
Stxbp2	3.977	5.297	3.903	4.293	4.993
Irf7	1.224	2.847	1.212	2.48	2.439
Fam183b	5.06	7.447	5.773	7.13	5.99
Rasgrp3	3.25	3.99	3.693	3.417	3.347
Defb1	0.247	0.5567	0.3987	0.3215	0.3933
Col9a2	0.9877	1.601	1.585	1.343	1.27
Tlr2	0.835	1.794	1.213	1.479	1.413
St14	0.1384	0.427	0.2368	0.3457	0.2521
Tlr7	1.179	1.971	1.516	1.693	1.556
Tlr4	0.3477	0.5647	0.52	0.5187	0.5053
Gm14005	0.05633	0.4817	0.1579	0.1278	0.2561
Eya4	0.8663	1.268	1.115	1.031	1.013
AK006651	0.5253	1.077	0.6263	0.6737	0.849
Rgl3	0.6137	1.02	0.7407	0.8123	0.9027
Ch25h	0.493	1.08	0.5723	0.959	1.027
Rgl2	5.843	7.387	5.743	5.833	7.56
Adamts1	4.713	5.717	5.347	5.56	4.373
Tmem106a	0.391	0.7907	0.459	0.7267	0.806
Dnajc24	4.167	5.463	4.123	4.597	4.737
Cryab	103.5	127.5	106.2	120.4	114.8
Clec2d	1.616	2.978	1.739	2.858	3.363
Miat	16.82	21.74	14.11	14.69	18.31
Apobec1	0.6593	1.168	0.5893	1.088	0.983
Pctp	0.51	0.782	0.7807	0.724	0.7597
Pld4	4.147	7.163	5.753	6.427	8.07
Lox	0.1937	0.4683	0.384	0.4053	0.2292
A230001M10Rik	1.655	2.285	1.552	1.704	1.592
Dcxr	3.997	5.74	4.39	4.703	5.263
Ctsz	26.03	38.3	29.48	36.33	33.04
Plau	1.027	1.651	1.004	1.344	1.459
C2	0.5397	1.249	1.021	1.179	1.793
Parvg	4.26	5.38	4.85	5.053	5.34
Ppp1r14a	22.09	30.21	23.56	24.93	26.09
Ctsk	0.7073	1.153	1.01	1.042	1.011
Rcn3	4.853	7.093	6.223	6.633	5.547
Esyt1	2.579	3.427	2.997	3.003	3.503
Lrrc36	0.2359	0.5277	0.2833	0.2569	0.3847
Hpgds	1.343	1.958	1.453	1.657	1.605
Car8	1.012	1.462	0.681	0.7727	0.8327
Ang	1.953	5.137	4.033	4.507	3.42
Scarf2	0.782	1.1	0.8527	0.977	0.8953
Il10rb	4.533	5.91	5.127	5.567	6.007
Car2	104.2	126.4	117.4	115.8	128.8
Bcat2	4.307	5.593	4.14	5.227	4.463
Ftl1	106	133.5	120.2	129.9	132.8
Cybb	0.3677	1.055	0.419	0.884	1.504
Cyba	8.793	14.58	11.56	14.2	15.28
Gm20257	0.4267	0.9647	0.7107	0.9437	0.9227
Htra3	1.541	2.34	2.018	1.611	1.842
Pls1	3.493	4.56	4	3.567	3.88
Nt5e	0.8053	1.124	0.8913	1.025	1.024
Casp8	0.7843	1.139	0.874	1.061	1.048
Aim2	0.8393	1.613	0.9973	1.094	1.474
Naalad2	0.6317	0.9187	0.68	0.7597	0.732
Rps6kb2	4.59	6.357	4.457	4.097	5.637
Gpr4	0.9803	2.016	1.46	1.693	1.556
Stom	5.257	7.06	6.713	6.513	6.453
Cd302	5.9	7.897	6.32	6.653	7.207
Csf3r	1.237	2.253	1.368	1.737	1.611
Arhgap4	0.6577	1.099	0.642	0.922	0.976
Zc3h12a	0.2365	0.574	0.2633	0.4863	0.4687
Plin3	8.747	10.89	8.713	9.863	9.757
S100b	63.33	86.7	76.4	73.4	83.7
Tgfbr2	4.7	6.417	5.423	6.173	5.58
H2-K2	0.7007	1.454	0.8303	1.416	1.378
Rassf2	13.96	17.68	15.98	15.8	15.66
Rassf4	1.678	2.522	1.773	1.892	1.864
Rida	27.09	35.87	31.94	35.43	37
Fermt3	1.398	2.081	1.571	1.9	2.118
Alas2	1.123	2.108	1.435	1.694	1.447
Fbxo32	2.821	3.69	3.171	3.282	3.125
Il1a	0.2151	0.4553	0.2887	0.357	0.428
Tmem63a	10.07	13.2	10.71	11.09	11.29
Mpeg1	9.557	16.99	12.93	13.78	14.9
Erbb2ip	16.99	22.36	20.01	19.37	17.19
Col11a2	2.125	2.885	2.198	2.259	2.441
Scel	0.2532	0.4313	0.3477	0.3316	0.3573
Ppl	0.534	0.719	0.631	0.648	0.6757
Hcar1	0.3291	0.764	0.653	0.713	0.4477
D7Ertd443e	1.415	1.904	1.588	1.52	1.68
Tmem8c	0.2675	0.502	0.3877	0.4553	0.411
Mbp	1077	1391	1158	1241	1274
Tal1	0.3797	0.598	0.365	0.474	0.4183
Kif13b	6.47	8.813	7.58	7.23	6.37
Gab2	4.15	5.013	4.543	4.307	4.307
Arl11	0.3763	1.118	0.4487	0.667	0.832
Kcne1l	2.428	3.373	2.896	2.77	3.219
Arhgap29	4.423	5.943	5.09	4.967	4.473
Nrbp2	40.13	48.83	38.93	38.07	43.43
Ctsh	5.453	9.787	7.18	9.667	10.38
Itgb2	2.625	5.073	3.713	4.573	4.54
Itgb5	18.21	24.33	21.49	22.99	21.23
Mtus1	9.293	11.63	9.613	10.42	9.773
Vav1	0.8363	1.292	0.875	1.266	1.304
Cd33	1.454	2.317	1.765	1.987	1.714
Ctsd	209	272.6	227.3	255.8	229.3
Ly9	0.2405	0.8783	0.4233	0.8133	0.8573
Mlh1	1.956	2.581	2.197	2.28	2.338
Cd37	2.618	4.283	3.587	3.8	5.643
Tcirg1	3.316	4.82	3.192	4.037	4.48
Fah	9.137	12.2	10.32	10.07	11.99
Helz2	0.4977	0.683	0.5057	0.6433	0.632
Isg20	0.3293	0.867	0.6513	0.8393	0.7233
Ctss	54.73	94.3	74.7	93.93	94.23
Sat1	18.92	24.19	20.98	23.1	24.21
Ehd4	3.35	4.183	3.63	3.93	3.617
Mpzl3	0.804	1.34	0.9573	1.082	0.878
Micall1	9.87	12.07	10.68	11.31	10.76
Ifih1	0.8923	1.365	1.029	1.239	1.262
Trf	199.1	308.5	239.5	233.7	240.9
Tram2	0.2206	0.4303	0.2946	0.1938	0.191
Gm7120	16.45	34.13	21.99	26.77	18.23
Cyp2j12	1.653	2.297	1.419	2.044	1.638
Gabra6	0.06927	0.3847	0.05943	0.0523	0.0409
Hrct1	0.6603	1.213	0.9713	1.193	0.9907
Cav1	5.783	7.753	6.827	6.947	5.983
Sspn	3.05	3.79	3.533	3.357	3.337
Serpina3n	37.33	62.87	44.23	52.7	43.53
Trmt13	0.9957	1.604	0.9413	1.251	1.121
Tppp3	27.94	39.6	28.22	33.7	33.63
Oxsr1	10.93	13.43	11.75	13.14	11.98
Apobr	0.2807	0.4517	0.3493	0.3843	0.4253
A4galt	1.057	1.848	1.355	1.627	1.437
Pir	2.167	3.027	2.966	2.906	2.927
Cxcl12	19.19	25.48	23.27	24.97	24.01
Slc26a10	1.103	1.581	1.167	1.465	1.594
Socs3	0.7193	1.496	1.122	1.228	1.208
Tyrobp	29.64	53.93	37.83	42.9	45.07
Robo3	1.206	1.726	0.9863	1.294	1.255
Txlnb	0.5413	0.9577	0.8387	0.623	0.7107
Ifi203	0.6587	1.161	0.77	0.9927	0.9373
Laptm5	22.5	29.19	27.81	26.29	29.6
Runx1	0.2187	0.3763	0.2295	0.3333	0.2718
Atoh8	0.8267	1.221	1.175	1.152	1.171
Tnfrsf1b	1.12	1.647	1.422	1.527	1.821
Tnfrsf1a	4.907	7.15	6.273	7.01	6.547
Mocos	0.4177	0.7367	0.566	0.6773	0.7097
Col5a2	0.369	0.53	0.4257	0.48	0.4287
Pglyrp1	7.537	11.62	9.52	11.35	9.707
Gna15	0.8623	1.411	1.196	1.149	1.443
Tgfbr3l	0.7753	1.309	0.588	0.9743	1.14
Tmem173	1.651	2.221	2.048	2.17	2.683
Rreb1	3.138	3.87	3.173	2.965	4.143
Cd83	6.213	7.947	6.863	7.527	8.083
Trem2	12.03	21.86	16.24	16.81	17.11
Cd84	0.9347	1.704	1.308	1.337	1.419
Cd86	0.7517	1.362	0.7687	1.188	1.239
Cxcl10	0.5743	3.347	0.856	3.091	4.407
Fbln1	5.143	7.38	7.28	6.597	5.993
Slc14a1	6.113	8.297	7.763	7.647	7.567
Hk2	1.295	1.729	1.53	1.582	1.475
Bhlhe41	6.02	7.3	7.253	6.633	7.633
Tatdn3	3.843	5.323	3.867	4.697	5.783
Wdsub1	11.33	20.02	15.72	15.28	18.03
Tnfrsf18	0.7253	1.243	0.565	0.777	1.189
Aox3	0.2928	0.5083	0.425	0.4453	0.4827
Serpinb9	2.686	3.447	2.704	3.309	3.237
Msn	9.897	14.42	11.78	13.23	12.7
Zbtb42	0.2791	0.4667	0.3697	0.3543	0.4627
Vegfa	19.58	27.17	20.12	24.2	22.44
Fes	0.8933	1.331	0.9557	1.26	1.439
Pycard	0.877	1.361	0.971	1.267	1.568
Hhatl	4.023	5.747	4.767	5.01	5.147
1600023N17Rik	0.1919	0.4313	0.2582	0.2334	0.337
Nupr1	6.607	12.17	7.62	10.96	8.2
Tmprss5	0.3687	0.5923	0.4813	0.4083	0.5557
Cbr2	0.5707	1.233	1.205	1.004	0.6297
Ms4a6d	0.749	1.494	1.225	1.414	1.703
Abca8a	3.005	5.017	4.18	3.573	3.607
Nr1h3	1.237	1.976	1.331	1.7	1.732
Rpp38	4.22	5.937	4.897	5.483	5.553
Sdpr	3.387	4.673	3.39	4.523	3.443
Tm4sf1	5.78	7.773	7.22	7.23	7.577
Eif4ebp1	1.697	3.208	1.856	2.348	2.261
Ccr5	1.831	2.64	2.162	2.354	2.782
Tfpi	1.214	1.715	1.562	1.616	1.359
Ms4a7	0.2016	0.748	0.3091	0.5413	0.7397
Mobp	353.3	498.7	346.7	459.7	368
Aldh1a1	21.26	26.89	18.77	25.2	19
Arhgap30	0.7217	1.185	0.8407	1.045	1.321
Prickle3	0.3136	0.5713	0.375	0.5287	0.4283
Ampd3	5.017	6.297	5.753	5.6	5.673
Slc13a3	4.987	8.043	7.053	6.843	5.733
Cd68	7.88	13.09	10.1	10.06	10.24
Ccl28	0.7703	1.42	1.306	1.147	0.783
Isg15	2.064	4.697	2.5	4.597	3.63
Pf4	0.5513	1.225	1.112	1.056	0.6803
Gpr108	7.523	9.363	7.33	8.767	8.093
Itih2	0.7063	1.882	1.541	1.508	1.175
7630403G23Rik	0.1799	0.556	0.462	0.415	0.3917
As3mt	4.95	6.403	5.157	6.073	6.1
Nos3	2.196	3.072	2.641	3.042	2.565
Upk1b	0.639	1.124	0.9583	0.8297	1.183
Galnt6	3.78	5.067	3.803	3.767	3.807
Hbb-b2	70.87	125.9	95.37	110.8	90.63
Slc38a5	1.011	1.686	0.9577	1.362	1.42
Plxnb3	3.99	4.96	3.713	3.797	3.957
Stab1	2.599	3.62	3.363	3.59	3.232
Cga	0.09217	0.98	0	0.4653	0
Zic4	0.5957	0.9387	0.6793	0.8587	0.629
Asgr1	0.518	1.29	0.769	1.016	0.7057
Padi2	10.26	12.86	11.34	10.9	10.98
Mag	76.8	93.23	73.07	78.77	80.43
Edn1	0.608	1.074	1.03	1.024	0.7553
Edn3	1.572	2.206	1.659	1.729	1.48
Fhod1	0.7207	1.014	0.8617	0.9193	0.8007
Ermn	20.57	28.57	24.27	23.46	24.82
Tmem140	0.6017	1.388	0.778	1.281	1.031
Vwa1	7.047	10.4	9.36	9.033	10.18
Podxl	7.037	8.71	7.037	8.65	6.773
Cast	1.65	2.259	1.865	2.032	1.928
Hfe	2.427	3.577	2.797	3.213	3.017
Hbb-bs	100.1	177	135.7	160.3	128.6
AK021325	2.526	4.033	3.913	3.55	3.373
Myo1f	0.85	1.393	1.055	1.241	1.337
Myo1d	4.18	5.117	4.623	4.537	4.373
Atp1b3	38.4	45.73	44.6	43.13	41.73
Islr	5.96	10.16	8.527	10.08	7.52
Wdfy4	0.2339	0.3787	0.2989	0.3533	0.4137
Zic1	2.683	3.987	3.08	3.61	2.49
Scara3	9.56	11.63	10.11	10.75	10.18
Mean Expression	14.545	20.9868	17.3384	18.5798	17.797

## Sheet: overlap_amelior_UDEGs
GeneSymbol	young_avg	old_avg	DR_avg	RALL_avg	RDRL_avg
Kcnh7	3.533	2.545	3.17	2.698	2.384
Dbpht2	9.087	7.747	8.36	8.08	8.883
Nrip1	8.233	7.05	8.033	7.11	6.263
Cpne5	6.287	5.14	5.727	5.387	5.93
Cux2	7.683	6.247	6.487	6.41	6.777
Hrk	11.05	9.33	10.34	10.06	10.61
D430041D05Rik	20.32	16.97	19.38	18.74	16.88
Ppp1r3g	4.807	3.747	4.407	4.667	4.51
Nova2	15.22	12.9	14.5	13.88	13.56
Nog	2.978	2.268	2.791	2.495	2.932
Syt5	71.5	61.33	65.87	63.97	70.2
Usp43	0.3633	0.1944	0.2495	0.2406	0.2906
Folr1	10.5	6.923	7.593	18.12	5.707
Cntnap2	17.35	14.73	15.87	15.23	14.59
Igsf21	13.63	11.18	12.49	12.04	13.15
Homer1	30.83	25.64	30.52	30.54	30.7
Fgfbp3	3.325	2.329	2.506	2.544	2.053
Steap2	1.81	1.406	1.43	1.887	1.137
4931408D14Rik	0.396	0.1094	0.1531	0.2572	0.03507
Marcksl1	36.4	28.98	36.2	31.05	35.9
Abcg4	18.46	16	16.98	16.7	17.36
Lmtk2	20.45	17.1	19.8	18.88	18.16
Nr4a2	26.28	20.73	25.79	22.49	26.54
Nr4a3	21.91	18.91	25.69	19.94	22.39
Tbr1	13.17	10.42	10.66	11.43	11.93
Henmt1	0.622	0.4033	0.4567	0.6097	0.544
Adgrl3	25.03	21.62	22.59	22.36	20.3
Cldn1	2.014	1.234	1.486	2.655	1.222
Cldn2	3.433	2.402	2.534	5.257	1.424
Sox4	4.723	3.653	4.25	4.3	4.127
F5	2.663	1.667	1.814	3.837	1.05
Zdhhc2	17.95	14.87	17.03	15.88	17.11
Helz	5.687	4.52	5.687	4.963	4.21
Negr1	33.7	28.89	32.13	29.32	30.69
Rcor2	4.41	3.443	4.107	3.46	4.037
Prokr2	0.948	0.6973	0.914	0.8	0.7737
Actn3	0.4767	0.25	0.3256	0.3653	0.3567
Tbc1d9	21.79	18.08	19.17	21.81	18.4
Dpysl5	6.69	5.47	5.953	6.14	6.093
Dpysl3	11.6	9.153	9.3	9.993	8.67
Sostdc1	6.31	4.333	5.42	9.297	3.993
Meis2	4.837	4.187	4.343	4.207	4.73
Raph1	6.083	5.117	5.95	5.197	5.253
Marcks	33.9	29.62	30.91	31.85	31.75
Reln	13.9	10.33	13.11	10.72	11.96
Prkg2	1.114	0.794	1.067	0.876	1.077
Scn5a	0.4327	0.2019	0.3254	0.379	0.4023
2022-03-09	8.81	7.117	8.89	7.28	8.567
Rps6ka2	11.08	9.22	10.02	9.26	9.88
Mn1	5.56	4.73	5.553	4.843	5.22
Lypd1	13.86	10.54	11.13	10.73	11.29
Dcc	3.847	3.271	3.89	3.427	3.267
Grin2b	14.04	10.96	13.4	11.98	7.207
Nav3	7.687	6.447	7.673	6.893	6.16
Pgam2	8.853	6.407	7.543	7.3	8.677
Kdm5b	13.71	11.95	13.97	13.01	12.79
Cdkl4	6.833	5.747	6.02	5.92	6.303
Lnpep	11.29	9.6	10.53	10.28	7.917
Cacna2d3	27.01	23.53	24.21	23.99	24.51
Wfs1	43.6	33.87	37.57	35.7	35.57
Mex3a	0.6333	0.4617	0.584	0.555	0.572
Mir8114	27.81	6.18e-05	17.88	12.22	3.258e-05
Tctn2	7.05	5.56	6.023	6.397	6.43
Tekt5	4.877	3.78	3.88	4.07	4.26
L1cam	25.14	20.85	21.72	21.14	21.59
Per1	19.7	17.2	18.95	17.35	18.09
Pitpnm3	8.857	7.44	8.103	7.777	8.46
Tmem132a	43.27	35.57	38.83	39.5	41.33
Osbpl10	8.17	6.423	7.78	6.56	8.507
Pgm2l1	62.13	53.17	57.77	56.7	52.7
Zfp184	0.8947	0.6147	0.6643	0.7423	0.726
Zswim6	6.57	5.58	6.783	5.683	6.95
Ttr	973.3	673	753.3	1891	587.3
Fosb	6.527	5.07	7.01	5.387	6.583
Gpr88	3.128	1.755	1.851	1.776	2.426
1500015O10Rik	16.31	11.76	12.98	30.17	9.98
Ttc9b	48.53	41.2	42.23	43.4	42.77
Hs6st2	7.967	6.777	7.32	7.017	7.383
Cfap52	1.047	0.6973	0.708	1.339	0.6927
Arhgap36	0.6433	0.34	0.343	0.3547	0.498
Pom121	15.98	13.4	15.01	14.22	14.18
Klf10	11.88	9.51	12.24	9.97	11.74
4930539E08Rik	1.276	0.8613	1.09	0.9787	1.153
Gap43	117	97.87	100.1	98.7	114
Epha6	15.29	12.09	13.58	13.67	9.92
Prss12	5.627	4.693	5.443	5.003	5.523
Chsy3	1.973	1.457	1.834	1.608	1.877
Prkar2b	11.26	9.277	9.333	9.907	10.1
Nptx2	11.29	9.447	11.07	11.33	12.39
Moxd1	3.261	2.439	2.729	2.913	2.602
Vwc2l	2.949	2.218	2.314	2.464	2.423
Slc25a30	3.917	3.082	3.304	3.288	3.117
Plppr1	2.957	2.077	2.243	2.28	2.306
Dtl	0.8667	0.5617	0.598	0.6517	0.762
Kl	13.23	9.797	10.11	19.11	7.293
Kirrel2	2.427	1.793	2.385	1.958	2.356
Ptchd4	0.9713	0.7733	0.8263	0.813	0.676
Tnc	0.9997	0.6677	0.841	0.8563	0.6527
Brinp2	20.24	17.67	20.53	19.64	21.02
Paqr9	14.83	12.47	14.17	13.39	11.2
Tbl1xr1	11.03	9.553	10.33	10.83	10.22
Pgpep1	3.39	2.85	3.51	3.28	3.137
Zmat3	11.75	10.12	10.94	11.51	11.24
Tox3	3.191	2.539	2.993	2.573	2.613
Sox11	2.205	1.467	1.894	1.892	1.974
Slc4a8	11.55	9.897	11.03	11.02	9.257
Sstr4	16.22	13.21	15.32	13.73	12.98
Gpr17	11.78	7.927	8.7	9.147	7.867
Slc35f1	11.36	9.513	10.12	10.01	10.15
Casp3	3.35	2.568	2.709	2.838	2.884
Fstl5	6.12	5.267	5.617	5.597	5.46
Mef2c	28.48	22.59	23.5	23.31	24.79
Tmem215	5.487	3.887	5.273	4.957	4.84
Ncan	33.77	28.33	31.15	29.66	28.86
Pcdh18	0.997	0.703	0.7683	0.7513	0.8417
Gm11627	1.895	1.157	1.304	1.342	1.639
Kcne2	8.68	5.253	6.467	13.11	2.58
Klhl11	17.38	14.1	16.4	14.34	12.61
Nlgn3	24.95	20.75	22.84	23.12	21.49
Cacnb2	18.51	14.17	17.01	15.45	14.73
Nwd2	4.877	3.75	4.303	4.047	3.763
Tenm3	13.28	10.65	12.82	11.12	10.77
Olfm2	24.08	20.13	21.47	20.23	21.9
Tenm1	3.667	2.893	3.907	3.004	2.521
Foxo6	10.26	8.577	13.22	9.053	11.73
Myo16	3.91	3.169	3.77	3.219	3.47
Zdbf2	3.34	2.556	3.143	2.99	2.986
Btaf1	5.99	4.197	4.217	4.977	3.967
Rasgef1c	1.502	0.8677	1.003	1	1.159
Aqp1	3.127	1.928	2.333	5.52	1.68
Rprm	20.57	15.79	16.3	16.49	19.63
Grik3	7.03	5.86	6.68	6.367	6.667
Ndst4	5.723	4.753	5.037	4.807	3.963
Pvrl1	12.59	10.51	12.47	11.6	12.06
Htr4	4.237	3.258	3.96	3.547	3.38
Chl1	34.73	29.52	30.5	30.85	29.95
Brwd3	1.309	0.9877	1.137	1.196	0.9043
Ide	17.52	10.74	11.55	14.28	9.407
Slc39a10	34.8	29.71	33.73	30.79	31.79
Bmp3	1.467	0.9423	1.164	1.016	1.249
Rrad	0.889	0.558	0.6083	0.6677	0.6987
Dmrta2	0.8847	0.613	0.8087	0.7807	0.613
Ccdc42	0.8717	0.359	0.404	0.3837	0.5947
Kcnf1	19.59	16.12	18.35	16.97	18.99
Slc29a4	11.47	9.653	10.18	13.04	9.8
Satb2	4.01	3.054	3.397	3.367	3.573
AK013627	5.667	3.224	3.44	10.09	4.533
Gpr161	12.09	10.3	11.66	11.99	10.85
Grm2	18.92	15.68	18.37	16.37	18.82
Tnik	19.61	16.99	18.6	17.13	16.59
Mean Expression	18.873	14.4456	16.2342	23.7799	14.6341

## Sheet: only_DR_amelior_ODEGs
GeneSymbol	young_avg	old_avg	DR_avg	RALL_avg	RDRL_avg
Igf2	26.2	37.3	36.37	54.87	27.04
Clec10a	0.1612	0.4687	0.2704	0.723	0.574
Slc52a3	0.7853	1.187	0.7487	1.206	0.9767
Cyp1b1	1.109	1.963	1.708	2.147	1.995
Wfdc17	0.3717	1.178	0.8893	1.259	1.444
Gbp5	0.855	1.579	0.8733	1.925	1.967
Sncg	3.813	5.457	4.773	5.823	6.103
Ptrf	6.923	9.413	9.217	10.54	8.21
Trim30a	0.9273	1.697	1.264	1.762	1.493
Irf1	2.73	4.04	3.112	4.73	5.27
Trim30d	0.449	1.005	0.729	1.047	0.913
Ddr2	1.537	1.977	1.877	2.061	1.536
Ctsc	2.124	3.059	2.421	3.292	3.231
Tmem252	0.7877	1.412	0.9733	1.452	1.014
B2m	112.1	191.8	139.3	232.3	212.7
Slamf8	0.107	0.3887	0.1911	0.5547	0.5923
Rhoc	9.983	12.85	10.51	12.95	11.47
F13a1	0.353	0.789	0.678	0.801	0.5243
2022-09-01	0.2102	0.575	0.4527	0.6517	0.9303
Bcl3	0.4427	1.217	0.4977	1.223	1.233
Csf2rb	0.2684	0.5337	0.473	0.6007	0.8697
H2-D1	24.51	45.63	30.38	59.53	56.33
Gstt2	0.7013	1.09	0.8977	1.163	1.108
Efemp2	5.02	6.493	5.66	6.83	6.093
S100a11	4.777	7.65	5.32	9.05	8.32
Rtp4	1.27	2.091	1.279	2.631	2.048
Pdpn	6.43	8.497	7.28	8.73	7.19
Sdf2l1	9.467	11.83	10.93	12.98	12.17
Ddx58	1.195	1.89	1.674	1.945	1.409
C1s1	0.2495	0.4933	0.472	0.7973	1.953
Csf2rb2	0.2885	0.549	0.3653	0.5817	0.6853
Clec3b	1.528	2.816	2.516	3.136	2.098
H2-Ab1	1.648	5.723	3.597	24.87	41
Ifi204	0.2698	0.7417	0.472	0.9373	1.099
Cebpd	3.993	5.52	4.26	5.533	4.883
Npc2	17.92	21.77	19.32	22.22	20.9
Stat5a	0.804	1.02	0.7777	1.133	0.8103
Alox5ap	3.273	4.643	4.463	5.307	5.417
Ly6c1	28.19	36.53	26.37	37.3	31.25
Ptprb	3.917	4.927	4.62	4.937	3.44
Ccl9	0.4853	0.7447	0.441	0.8083	0.4483
Lyn	2.657	3.56	3.209	3.627	3.897
Jchain	0.0876	2.776	0.3132	5.77	4.143
Rac2	0.652	1.162	0.822	1.258	1.792
Fn1	8.363	10.52	10.07	10.71	8.17
Mmrn2	1.23	1.92	1.311	1.925	1.511
Parp14	0.5707	1.067	0.8707	1.124	1.154
Fcgr2b	2.361	4.877	3.46	5.097	6.313
Naip2	0.3249	0.5527	0.5143	0.5573	0.5477
Epsti1	0.2712	0.614	0.4513	0.8033	1.085
Psmb9	1.517	3.212	2.121	5.56	6.927
Psmb8	2.088	4.767	3.417	7.07	8.623
Pcolce	6.37	8.783	7.357	11.28	5.713
Flna	5.997	7.547	7.267	8.237	6.383
Ucp2	17.25	21.14	16.26	25.13	17.34
Slc22a8	3.977	5.17	4.777	5.237	3.453
Iigp1	0.8557	1.813	0.6857	2.54	4.703
Gbp2	1.558	3.79	1.999	4.947	7.257
Adm	0.9463	1.567	1.145	1.61	1.49
Ly6a	18.81	29.37	17.71	31.94	27.49
H2-T23	4.43	8.717	6.443	11.15	12.14
Ccl5	0.3302	1.982	1.107	3.407	10.36
Scpep1	6.03	7.773	6.787	7.787	7.623
H2-Eb1	0.9313	2.89	1.648	14.4	21.36
Ifi47	0.5457	1.126	0.9923	1.693	2.962
Vasp	4.753	6	5.9	6.143	6.57
Syne3	0.4313	0.666	0.595	0.7	0.512
Ccl8	0	1.067	0.9393	5.57	12.83
Fgd2	1.42	2.05	1.883	2.17	2.343
Tap1	1.37	2.315	1.568	3.181	3.85
Tgm2	4.367	7.71	5.157	8.127	5.86
Tap2	4.4	6.333	5.477	6.84	7.387
Shc1	2.197	2.938	2.577	2.994	2.83
Stat1	6.69	11.14	7.117	13.15	13.26
Il2rg	0.429	1.106	0.6353	1.503	1.937
Ifi27	33.83	45.47	36.87	47	40.73
AW112010	1.098	2.802	1.369	3.8	5.587
Ccl12	0.8833	2.994	1.529	3.014	2.514
Ifi30	2.566	4.633	2.751	5.543	6.747
Rbp1	3.803	5.167	4.427	5.577	3.927
Mall	0.361	0.6373	0.5903	0.749	0.698
Tgfbi	1.373	2.114	1.874	2.51	2.5
Txnip	11	13.5	11.63	15.52	13.39
Cpq	6.21	8.667	7.477	9.46	7.313
Thbd	4.837	6.497	6.1	6.637	4.973
Pdcd1	0.08683	0.3607	0.1844	0.371	0.4493
Fxyd1	72.77	93.77	81.47	99.77	82.23
Itga5	0.509	0.7667	0.6187	0.7953	0.5697
Fgl2	0.8637	1.813	1.532	1.993	2.62
Mgst1	8.173	11.76	10.6	12.46	11.61
Lamp2	33.93	41.07	38.33	41.87	36.43
Cxcl16	1.24	2.225	1.616	2.345	2.341
Fcgr3	8.987	12.98	11.53	14.39	14.64
F11r	3.212	4.327	3.497	4.897	3.75
Ifitm3	15.21	31.65	21.16	35.57	31.63
Aox1	1.064	1.44	1.234	1.512	1.167
Ifitm1	1.759	3.593	2.409	4.21	4.403
Eln	1.151	2.491	1.68	2.658	1.552
Entpd1	3.137	4.073	3.723	4.453	3.823
Gbp3	1.5	3.321	1.656	3.48	3.298
Cd274	0.6433	1.079	0.8097	1.426	1.46
Gbp7	0.9143	1.534	1.036	1.811	1.642
Ecm1	1.889	3.254	2.928	3.58	3.232
Apobec3	0.971	1.589	1.227	1.699	2.313
Fam129a	0.6223	0.8923	0.7537	0.9147	0.7643
Xdh	1.82	2.681	2.306	2.839	2.503
Bdh2	0.95	1.498	1.214	1.57	1.491
Bin2	2.037	2.825	2.656	3.154	3.261
Cd74	4.03	14.23	7.703	70.93	81.3
Pecam1	6.233	7.617	6.947	7.827	5.93
Bcl2a1b	0.943	2.211	1.175	2.504	2.298
Clic1	7.383	10.25	8.96	10.97	11.32
M34473	0.439	33.93	5.84	55.27	61.53
Smad6	0.5453	0.9093	0.7093	0.9367	0.7903
Ntn4	1.956	2.669	2.229	2.765	1.985
Ms4a6c	0.4153	1.252	0.6233	1.317	1.425
Ier3	2.601	4.31	3.463	4.517	4.153
Col4a6	0.2231	0.3607	0.337	0.3687	0.3035
Casp12	0.2371	0.6003	0.4457	0.623	0.841
M13680	8.643	146.2	29.53	330.5	244.2
Cytl1	0.427	1.672	1.006	1.766	0.8357
Vcam1	9.32	11.3	10.53	12.93	10.72
C3	1.43	3.317	1.766	4.04	6.703
Tagln2	6.373	8.917	7.957	9.693	9.067
Il18bp	0.8483	1.338	1.163	1.592	1.875
A2m	3.307	6.217	2.408	6.88	2.8
Slc37a2	0.795	1.155	1.097	1.432	0.872
Crispld2	0.7423	1.272	1.036	1.286	0.8067
Clec5a	0.4287	0.703	0.6067	0.707	0.6563
Vamp8	11.56	15.11	12.07	16.15	13.87
H2-Aa	1.347	4.863	3.144	24.46	34.3
Pik3r5	0.537	0.7863	0.653	0.803	0.846
Cox8b	5.42	9.97	6.213	12.9	4.863
Gimap4	0.1847	0.4023	0.3827	1.005	1.733
S100a4	3.101	7.063	5.423	7.4	7.647
Irgm2	1.537	2.504	1.796	3.817	4.36
Serpine1	0.3033	0.6833	0.3677	0.7123	0.4517
Irgm1	3.877	6.24	4.537	8.32	7.973
Gm4951	0.1687	0.5597	0.2499	0.811	1.072
Cd63	31.32	39.73	36.07	41.7	37.83
Ecscr	1.788	2.712	1.966	2.838	2.591
Akna	0.825	1.085	0.8837	1.125	1.197
mKIAA1554	0.8673	1.629	1.148	1.849	1.473
Slc13a4	4.56	6.883	5.95	8.477	4.543
Trim21	0.8553	1.285	0.9947	1.384	1.208
Serpinb6b	0.564	0.8423	0.5717	1.105	0.9197
Emilin1	0.7777	1.073	0.8637	1.143	0.8883
V00821	4.157	14.06	6.95	23.35	31.54
Cpxm2	0.9777	1.39	0.8397	1.585	0.8223
Eps8l1	1.489	2.3	1.442	2.612	2.042
Vwf	3.211	7.04	5.04	9.29	7.267
Cp	3.883	6.467	5.857	6.477	5.69
Ptpn6	1.431	3.032	2.235	3.243	3.877
Siglecf	0.2317	0.398	0.36	0.4337	0.4817
Hmox1	3.328	4.627	4.05	5.027	5.013
Lgals3	0.9873	1.835	1.256	2.393	1.789
Tor3a	2.297	3.067	2.493	3.198	2.613
Icam1	1.176	2.268	1.426	2.456	2.417
Slfn2	0.995	2.017	1.489	2.452	2.832
Dab2	2.35	3.094	2.963	3.45	2.139
Lrg1	0.553	2.069	0.6983	2.445	2.155
Icosl	4.607	5.857	5.643	6.053	6.363
Lcp1	2.935	4.387	3.543	4.603	5.103
Cd52	4.083	13.49	8.86	14.84	18.59
Cd53	2.566	3.443	3.187	3.723	4.253
Xaf1	3.717	6.61	3.7	6.77	5.167
Slc38a3	24.95	29.71	27.69	29.95	27.83
Ahnak	2.738	3.723	3.433	4.147	2.921
Tpm4	10.35	12.83	11.44	13.53	12.46
Pla1a	0.2963	0.681	0.6117	0.8363	1.204
Tcn2	11.84	15.11	12.7	16.51	11.87
Arhgdib	6.66	9.263	8.027	10.01	11.01
Emp3	1.256	3.131	2.515	3.312	2.465
Srgn	5.777	8.757	7.307	9.723	11.05
Mxra8	2.293	3.377	2.831	3.697	3.08
Plin2	2.576	3.66	3.053	3.733	3.77
Havcr2	0.965	1.372	1.082	1.534	1.474
Cd82	14.82	18.01	15.1	18.1	16.71
H2-K1	16.82	33.1	22.21	47.9	51.6
Uaca	1.848	2.946	2.508	3.016	2.268
Lgals3bp	11.34	20.86	14.02	22.59	16.4
Serping1	4.263	8.873	7.087	9.577	11.58
Pla2g4a	0.9843	1.528	1.12	1.65	1.426
Bmp7	2.046	3.467	3.299	3.503	2.615
Bmp6	3.673	6.09	5.47	6.437	4.3
AI506816	1.71	1.987	1.929	2.282	2.045
Fcgr4	0.1456	0.452	0.243	0.9403	2.034
Col18a1	1.121	1.876	1.747	2.314	1.738
Ncf4	0.438	0.8067	0.389	0.8857	1.008
Tinagl1	3.87	5.123	4.717	6.227	4.847
Adgrl4	5.58	6.963	6.713	7.15	6.22
Ctsl	17.25	20.6	18.26	20.6	19.99
Tapbp	9.447	12.67	10.22	13.06	13.46
Hcar2	0.09367	0.3647	0.1551	0.366	0.2914
AI662270	0.1197	0.371	0.1776	0.4713	0.5923
Igtp	1.896	3.503	2.349	6.41	7.717
Fcgr1	1.208	1.966	1.534	2.115	2.263
Ginm1	7.2	9.163	8.903	9.827	9.683
Bst2	6.007	11.75	8.287	18.13	12.7
Vstm4	1.527	2.044	2.033	2.306	1.778
Tspo	4.86	7.423	6.08	9.04	7.84
Mndal	0.874	1.52	0.8647	1.722	1.591
Mean Expression	4.91345	8.30894	6.02352	10.9208	9.97165

## Sheet: only_RALL_amelior_ODEGs
GeneSymbol	young_avg	old_avg	DR_avg	RALL_avg	RDRL_avg
Fmo2	0.386	0.873	0.945	0.6523	0.6743
Smpdl3b	0.7563	1.113	1.157	0.746	1.367
Osr1	0.938	1.377	1.565	1.279	1.186
Tmco5	0.2387	0.5367	0.7557	0.3893	0.4213
Gm5086	0.458	0.835	0.8837	0.6093	0.663
AK134520	0.2997	0.4707	0.482	0.4037	0.3603
Nes	2.353	2.944	3.309	2.632	2.887
Smagp	0.6787	1.288	1.289	1.135	1.398
Klf4	1.765	2.769	3.54	2.677	2.661
Klf2	4.907	6.207	7.183	6.193	6.12
Il13ra1	1.569	2.457	2.607	2.378	2.38
Dcdc2a	1.498	2.084	2.135	1.949	1.952
Slc7a11	10.43	11.71	13.5	11.48	11.96
Cyp2e1	0.1711	0.525	0.627	0.3917	0.3567
Exoc3l4	0.5163	0.7957	0.816	0.6673	0.8147
Mdrl	0.2308	0.481	0.5207	0.1835	0.3527
Col6a2	1.348	1.981	2.045	1.602	2.135
AK202301	7.983	9.73	10.07	9.717	10.22
Abca9	1.667	2.206	2.273	2.128	1.797
Sphk1	0.579	1.107	1.135	0.9853	0.7853
Hhex	0.697	1.156	1.21	0.821	1.126
Slc6a20a	4.587	8.527	9.633	7.903	6.28
Spag6l	1.088	2.233	2.368	1.619	2.497
Zfp36l2	5.683	7.113	7.187	5.793	7.073
Adgrg6	0.2602	0.392	0.407	0.3607	0.2892
Colec12	2.129	3.319	3.55	3.221	2.932
Synpo2	0.7863	1.041	1.098	0.9877	0.86
Smoc1	5.06	6.49	6.547	5.553	6.137
Kdr	2.763	3.61	3.637	3.207	2.797
Eya2	0.8147	1.2	1.26	0.9517	0.9387
Mean Expression	2.08803	2.8857	3.1245	2.62052	2.71404

## Sheet: only_DR_amelior_UDEGs
GeneSymbol	young_avg	old_avg	DR_avg	RALL_avg	RDRL_avg
Cdh13	14.6	12.48	13.54	11.46	12.51
Chrm4	10.23	8.237	10.06	8.057	10.55
Adamts3	2.259	1.905	2.014	1.872	1.949
Zcchc12	25.39	20.87	23.11	19.99	25.1
Cdh4	2.632	2.022	2.077	1.936	2.125
Dpp10	13.73	11.17	11.27	10.45	12.55
Plcxd2	7.803	6.29	6.33	6.26	6.49
Cartpt	3.185	2.079	2.199	1.902	3.169
Arhgap32	21.27	17.73	19.42	17.09	16.92
Hecw1	6.367	5.24	5.73	5.23	5.253
Usp29	5.843	4.71	4.853	4.563	4.803
Ankrd63	5.46	4.34	5.493	4.303	4.97
Ecel1	1.9	1.051	1.507	0.969	2.15
Mycn	2.643	1.89	2.205	1.83	2.128
Ntsr1	1.836	1.278	1.486	1.24	1.689
Gpr26	12.98	10.71	12.83	10.28	9.007
Lzts1	14.78	11.72	12.69	11.22	12.23
Pgap1	3.45	2.833	3.111	2.713	2.949
Tmem130	67.8	57.17	61.07	55.6	61.07
Gpr6	0.8247	0.5437	0.5497	0.388	0.545
Hdac9	9.46	8.13	9.2	7.743	8.38
Penk	23.9	18.56	23.54	17.35	22.94
Plcxd3	5.08	3.943	4.437	3.311	3.56
Cntnap3	1.624	1.211	1.222	1.039	1.337
Xylt1	8.417	7.167	8.053	6.847	5.843
Gng4	11.23	9.57	9.61	9.213	10.1
Rab3b	16.27	13.82	15.69	13.36	15.83
Plxnd1	5.433	4.427	5.237	4.173	4.98
Hes5	6.053	3.803	5.61	3.75	6.447
Necab1	20.49	17.38	18.22	15.12	18.83
Cntnap4	6.483	5.437	5.87	5.177	5.667
Stx1a	46.5	40.2	40.73	40.07	44.6
Map3k9	5.977	5.163	5.823	5.013	5.08
AK135172	7.557	6.153	7.123	6.073	5.16
Gpr165	2.059	1.379	1.592	1.366	1.525
Cbln4	5.5	3.877	5.253	3.56	4.377
Hs6st3	9.457	7.84	9.407	7.427	6.49
Tmem132e	2.731	2.232	2.739	1.951	2.445
Pcdh7	11.75	9.923	10.9	9.657	9.6
Arpp21	43.7	37.93	39.43	35.17	43
Gabra3	21.18	18.48	18.9	17.57	20.27
Arntl	11.96	10.07	10.78	9.06	10.89
Klf5	2.716	1.988	2.42	1.751	2.273
Sec14l3	0.7887	0.5817	0.589	0.452	0.588
Cckbr	4.857	3.79	3.803	3.723	4.63
Aff2	2.849	2.332	2.424	2.142	1.719
AK187054	1841	1630	1642	1595	1596
Grin3a	7.06	5.693	5.9	5.53	5.68
Hcn1	14.44	12.49	13.62	12.42	12.42
Bcl9l	8.96	7.75	9.51	7.567	7.72
Dner	46.43	40.27	44.3	39.2	41.97
Atp2b4	21.35	15.09	17.66	14.8	17.31
Peg3	30.7	26.61	28.2	26.31	24.36
Mean Expression	46.9612	40.8973	42.1007	39.816	40.9468

## Sheet: only_RALL_amelior_UDEGs
GeneSymbol	young_avg	old_avg	DR_avg	RALL_avg	RDRL_avg
AK138476	0.4407	0.2508	0.1752	0.3158	0.2606
Htr2c	12.75	10.95	10.95	12.48	11
Vat1l	12.34	8.68	8.36	12.52	8.65
Cbx2	0.605	0.4277	0.4247	0.4733	0.428
Fnbp1l	7.017	5.867	5.36	6.6	5.787
Clic6	8.007	5.237	5.103	12.5	3.71
Cdr1	27.3	23.34	21.89	36.13	31.05
Six3	0.3693	0.2005	0.1813	0.3241	0.2009
Nrep	24.2	20.67	17.56	21.38	20.74
Dcx	1.879	1.291	1.217	1.333	1.147
Pomc	2.18	1.515	0.7317	1.746	0.875
Cdh3	0.352	0.188	0.1753	0.4753	0.1396
Nxph4	1.268	0.6723	0.5957	0.801	0.91
Cdh6	1.608	1.339	1.331	1.418	1.379
Nts	5.617	4.35	3.963	4.693	5.39
Sncaip	1.364	1.037	1.032	1.206	0.855
Ndn	133.3	76.43	66.97	98.57	77.5
Glra2	2.976	2.292	2.064	2.326	2.476
Tmem72	1.799	1.142	1.092	2.847	0.666
Sema6a	3.863	3.309	3.29	3.373	3.211
Lbp	4.143	3.37	2.776	6.917	2.52
Myh7	1.855	1.446	1.36	1.579	1.73
Sema3f	1.311	0.981	0.953	1.233	0.965
Tshz2	22.38	19.16	18.33	19.43	20.51
Enpp2	239.2	185.1	179.6	351.7	136.4
Igfbpl1	0.5043	0.1621	0.1276	0.464	0.1731
Slc4a5	2.192	1.378	1.378	3.473	0.8537
AI414108	3.527	2.888	2.661	3.061	3.174
Ptpro	5.833	4.487	4.477	4.747	4.41
Epha5	24.91	21.04	20.75	22.57	20.48
Mean Expression	18.503	13.64	12.8293	21.2229	12.253
