# Supplementary material for: Dietary Restriction and Rapamycin Affect Brain Aging in Mice by Attenuating Age-Related DNA Methylation Changes
Source: Genes (Basel). 2022 Apr 15;13(4):699. doi: 10.3390/genes13040699 (PMC9030181; doi:10.3390/genes13040699)
Supplement: Supplementary file 1 [file genes-13-00699-s001.zip › Table S5 - Different Methylation Region and Genes.xlsx]

## Sheet: aging-related DMR
Bin_ID	logFC	AveExpr	t	P.Value	adj.P.Val	B
chr3@bin_3111_w	-0.573333	0.483333	-5.03357	0.00364993	0.490833	-1.36234
chr19@bin_2023_w	-0.53	0.481667	-5.0188	0.00385675	0.514482	-1.43113
chr1@bin_3842_w	-0.506667	0.47	-2.80476	0.0366898	0.755205	-3.75788
chr8@bin_3687_w	-0.456667	0.633333	-5.23059	0.00309703	0.459509	-1.18379
chr1@bin_344_w	-0.426667	0.466667	-5.62895	0.00225115	0.529501	-0.852257
chr5@bin_939_c	-0.423333	0.691667	-4.71841	0.00489582	0.61433	-1.65606
chr11@bin_1533_w	-0.416667	0.681667	-2.57073	0.0493472	0.821532	-4.12896
chr4@bin_1529_c	-0.406667	0.333333	-15.5964	1.61176e-05	0.0645757	3.24337
chr4@bin_3629_w	-0.393333	0.546667	-3.61227	0.0146801	0.646625	-2.80759
chr2@bin_2611_c	-0.383333	0.718333	-3.51068	0.0164805	0.663887	-2.94631
chr5@bin_793_w	-0.383333	0.62	-4.2498	0.00761995	0.647846	-2.11815
chr11@bin_3139_w	-0.38	0.755	-3.58575	0.0154108	0.734989	-2.89526
chr11@bin_107_c	-0.38	0.81	-3.23536	0.0226147	0.759358	-3.30405
chr16@bin_2199_c	-0.38	0.58	-3.01179	0.0291651	0.793564	-3.57284
chr6@bin_238_w	-0.378333	0.575833	-3.20848	0.0228591	0.739724	-3.31047
chr4@bin_4466_w	-0.376667	0.471667	-10.5376	0.000114157	0.160277	1.88574
chr19@bin_2095_c	-0.376667	0.378333	-4.13182	0.00875463	0.572577	-2.29758
chr3@bin_4408_w	-0.373333	0.813333	-3.31081	0.0202429	0.642004	-3.16226
chr10@bin_3555_c	-0.366667	0.793333	-4.93247	0.00396969	0.578956	-1.43678
chr2@bin_6129_c	-0.363333	0.695	-2.57302	0.0488357	0.745151	-4.09146
chr15@bin_2399_c	-0.363333	0.413333	-4.82119	0.00447048	0.546027	-1.56124
chr18@bin_2381_c	-0.355	0.3425	-5.32932	0.00290306	0.394723	-1.10918
chr2@bin_3745_w	-0.353333	0.763333	-2.58889	0.0478931	0.745151	-4.07115
chr11@bin_252_w	-0.353333	0.74	-2.77105	0.0387319	0.797727	-3.87448
chr2@bin_2708_w	-0.346667	0.423333	-6.99949	0.000837925	0.312838	0.122476
chr17@bin_2940_c	-0.343333	0.681667	-5.40963	0.00269201	0.410446	-1.0459
chr11@bin_905_w	-0.341667	0.524167	-2.58526	0.0484787	0.821532	-4.11037
chr18@bin_805_c	-0.34	0.58	-5.14201	0.0034008	0.409553	-1.27092
chr1@bin_4914_w	-0.336667	0.355	-3.42266	0.0180147	0.652389	-3.01097
chr8@bin_260_c	-0.336667	0.595	-6.76972	0.000949996	0.392795	-0.00381956
chr2@bin_4795_c	-0.333333	0.566667	-4.13562	0.00862197	0.55897	-2.26015
chr3@bin_944_c	-0.333333	0.723333	-3.5197	0.0160612	0.642004	-2.91767
chr9@bin_3440_c	-0.333333	0.546667	-6.5866	0.00112595	0.604483	-0.169538
chr7@bin_4559_w	-0.328333	0.8025	-2.66052	0.0436006	0.786789	-4.00171
chr9@bin_3143_w	-0.326667	0.646667	-2.78221	0.0380041	0.813382	-3.85765
chr17@bin_1061_w	-0.326667	0.733333	-2.87498	0.0337427	0.746128	-3.70028
chr4@bin_1071_c	-0.323333	0.688333	-3.17435	0.0238324	0.713906	-3.31901
chr18@bin_1728_w	-0.323333	0.41	-8.93521	0.000258994	0.146518	1.1932
chrX@bin_756_c	-0.321667	0.839167	-13.0609	1.12669e-05	0.0381835	2.57451
chr7@bin_1664_w	-0.32	0.393333	-2.66005	0.0436256	0.786789	-4.00231
chr2@bin_5919_w	-0.316667	0.718333	-9.56334	0.000187635	0.173882	1.49454
chr5@bin_1435_w	-0.316667	0.505	-2.91572	0.0321233	0.818606	-3.63404
chr7@bin_3657_w	-0.316667	0.745	-4.68425	0.00503537	0.543993	-1.71575
chr11@bin_6263_c	-0.313333	0.686667	-2.72462	0.0409474	0.805417	-3.93308
chr15@bin_237_w	-0.313333	0.426667	-3.97554	0.0100326	0.704197	-2.40694
chr15@bin_3847_c	-0.313333	0.456667	-2.82344	0.035884	0.817362	-3.74998
chr1@bin_6081_w	-0.31	0.411667	-3.98889	0.00989452	0.604702	-2.38061
chr7@bin_1860_c	-0.31	0.645	-4.74533	0.00476213	0.543993	-1.6571
chr7@bin_2528_w	-0.31	0.345	-2.69607	0.0417515	0.785952	-3.9563
chr4@bin_3979_c	-0.306667	0.64	-3.06761	0.0269438	0.718773	-3.44826
chr5@bin_4113_w	-0.306667	0.366667	-2.99431	0.0292861	0.818606	-3.53692
chr17@bin_3222_w	-0.306667	0.456667	-3.3846	0.018791	0.683689	-3.08254
chr19@bin_1555_c	-0.305	0.799167	-3.18702	0.0237888	0.716371	-3.36304
chr1@bin_2528_c	-0.303333	0.455	-2.98525	0.0296235	0.735738	-3.53393
chr2@bin_1426_w	-0.298333	0.760833	-3.65937	0.0140494	0.653288	-2.77708
chr15@bin_141_w	-0.298333	0.6475	-2.75798	0.0388185	0.822885	-3.83224
chr12@bin_2503_w	-0.2975	0.474583	-3.41696	0.0182881	0.672392	-3.04735
chr1@bin_5775_c	-0.296667	0.851667	-3.19383	0.0232805	0.696075	-3.28085
chr5@bin_3506_w	-0.295833	0.33875	-4.05397	0.00925218	0.680241	-2.32206
chr12@bin_3355_w	-0.294433	0.496117	-3.45317	0.0175765	0.672392	-3.00533
chr17@bin_3175_c	-0.291667	0.600833	-2.96595	0.0303044	0.733019	-3.58724
chr11@bin_1797_w	-0.29	0.748333	-5.61472	0.00237175	0.478319	-0.92141
chr15@bin_638_c	-0.29	0.461667	-3.00953	0.0287994	0.777417	-3.51914
chr15@bin_2280_w	-0.288333	0.5925	-3.90647	0.0107663	0.714745	-2.48129
chr13@bin_1160_c	-0.286667	0.856667	-4.62748	0.00529362	0.488013	-1.73881
chr14@bin_2784_c	-0.286667	0.856667	-11.9582	6.28522e-05	0.137711	2.37853
chr18@bin_2122_w	-0.286667	0.68	-4.64031	0.00530784	0.53268	-1.7304
chr3@bin_2866_c	-0.283333	0.831667	-2.82388	0.0356531	0.710201	-3.75833
chr14@bin_2790_c	-0.283333	0.768333	-4.07649	0.00916171	0.711953	-2.32614
chr17@bin_3662_c	-0.283333	0.858333	-16.6915	1.13705e-05	0.0358284	3.48405
chr15@bin_2454_c	-0.283333	0.5961	-3.53407	0.015952	0.76659	-2.89616
chr17@bin_46_c	-0.283333	0.508333	-3.23952	0.0221063	0.706996	-3.25439
chr17@bin_19_c	-0.283333	0.725	-2.65218	0.0441333	0.807462	-3.98145
chr5@bin_4602_w	-0.281667	0.375833	-2.76392	0.0385077	0.85177	-3.82393
chr11@bin_6201_c	-0.28	0.763333	-2.84541	0.0354546	0.77705	-3.78116
chr17@bin_2624_c	-0.28	0.613333	-3.92018	0.0106144	0.600939	-2.47817
chr17@bin_1229_w	-0.28	0.393333	-3.23511	0.022217	0.706996	-3.25967
chr18@bin_720_c	-0.278333	0.480833	-3.92117	0.0106641	0.651437	-2.4602
chr13@bin_3868_w	-0.278333	0.780833	-6.56353	0.00109993	0.326328	-0.146288
chr2@bin_4583_c	-0.276667	0.771667	-2.74281	0.039719	0.740508	-3.87547
chr11@bin_5245_w	-0.276667	0.381667	-4.88725	0.00435896	0.608359	-1.55505
chr11@bin_156_w	-0.276667	0.815	-4.31677	0.00735923	0.618449	-2.10819
chr3@bin_3239_w	-0.275	0.559167	-5.47966	0.00249996	0.436075	-0.973289
chr8@bin_4377_w	-0.275	0.6675	-2.65922	0.043613	0.762349	-3.95201
chr9@bin_1110_w	-0.275	0.680833	-5.23495	0.00318447	0.687846	-1.2313
chr13@bin_3979_w	-0.273333	0.793333	-4.10516	0.00875014	0.578305	-2.26474
chr17@bin_2583_c	-0.273333	0.783333	-5.67425	0.0021716	0.410446	-0.826646
chr7@bin_2275_c	-0.273333	0.753333	-5.62863	0.00223795	0.543993	-0.871789
chr7@bin_1161_c	-0.273333	0.496667	-4.15471	0.00834515	0.585499	-2.24948
chr8@bin_2509_c	-0.273333	0.653333	-3.22666	0.0223261	0.688651	-3.24995
chr10@bin_2312_c	-0.273333	0.486667	-4.22514	0.00769742	0.611241	-2.12432
chr1@bin_5142_c	-0.27	0.865	-6.38284	0.00126607	0.441493	-0.280338
chr2@bin_6572_c	-0.27	0.815	-3.02347	0.028492	0.697109	-3.52587
chr3@bin_504_w	-0.27	0.758333	-5.35264	0.00277777	0.456138	-1.08111
chr5@bin_4436_c	-0.27	0.648333	-3.87055	0.0111544	0.704926	-2.51895
chr5@bin_4728_w	-0.27	0.751667	-3.63575	0.0142772	0.716582	-2.77933
chr3@bin_2037_w	-0.268333	0.454167	-6.70989	0.00098282	0.436075	-0.0390966
chr9@bin_1153_c	-0.268333	0.3525	-2.71998	0.0409546	0.813382	-3.93637
chr2@bin_5790_w	-0.266667	0.458333	-2.86313	0.0343962	0.720429	-3.72435
chr5@bin_3311_w	-0.266667	0.133333	-21.0741	3.4625e-06	0.0305012	4.01265
chr8@bin_2202_c	-0.266667	0.543333	-2.90637	0.0323841	0.72493	-3.64094
chr9@bin_2764_w	-0.266667	0.643333	-3.40887	0.0185064	0.793306	-3.0943
chr13@bin_4002_c	-0.266667	0.79	-7.30036	0.000665896	0.310866	0.336865
chr13@bin_4002_w	-0.266667	0.77	-5.75103	0.00202379	0.37969	-0.752074
chr14@bin_2031_w	-0.266667	0.711667	-3.7133	0.013293	0.722148	-2.72053
chr15@bin_2838_c	-0.266667	0.303333	-6.58383	0.00109665	0.393526	-0.141325
chr2@bin_1254_w	-0.263333	0.491667	-3.49169	0.0168242	0.663887	-2.9682
chr10@bin_1418_w	-0.263333	0.728333	-3.1141	0.0252671	0.695299	-3.3731
chr1@bin_247_c	-0.263333	0.615	-3.74323	0.012754	0.606372	-2.64741
chr4@bin_1312_c	-0.263333	0.801667	-4.44287	0.00635026	0.570518	-1.926
chr15@bin_1307_c	-0.261667	0.769167	-2.98471	0.0296474	0.779268	-3.54965
chr2@bin_4646_w	-0.26	0.838333	-2.77354	0.0382781	0.737521	-3.83671
chr3@bin_1363_c	-0.26	0.313333	-4.78066	0.00457256	0.555212	-1.59619
chr10@bin_1792_w	-0.26	0.526667	-3.06182	0.0268479	0.704852	-3.4368
chr11@bin_4095_c	-0.26	0.743333	-5.52562	0.00254694	0.500553	-0.994967
chr12@bin_3877_w	-0.26	0.706667	-5.78322	0.00202911	0.644532	-0.752258
chr12@bin_2074_w	-0.26	0.223333	-5.00353	0.00386128	0.644532	-1.41159
chr15@bin_1595_w	-0.26	0.533333	-3.21057	0.0228462	0.76659	-3.27527
chr2@bin_503_w	-0.258333	0.5175	-5.11279	0.00350258	0.503624	-1.31663
chr4@bin_5141_w	-0.256667	0.665	-2.84792	0.0348791	0.750503	-3.71944
chr5@bin_5061_w	-0.256667	0.431667	-2.65478	0.0439609	0.860074	-3.96215
chr7@bin_439_c	-0.256667	0.755	-3.33644	0.0197659	0.680092	-3.16592
chr8@bin_1119_w	-0.256667	0.615	-4.73432	0.00479382	0.476488	-1.63438
chr12@bin_2986_c	-0.256667	0.7	-5.59286	0.00235932	0.644532	-0.905335
chr14@bin_1686_w	-0.256667	0.711667	-6.77233	0.000981541	0.465161	-0.0312954
chr14@bin_2220_c	-0.256667	0.608333	-4.12867	0.00869877	0.687071	-2.27131
chr2@bin_6814_w	-0.255	0.540833	-3.45046	0.0175984	0.663887	-3.0159
chr3@bin_2619_c	-0.255	0.5425	-3.39728	0.0183784	0.642004	-3.06015
chr10@bin_3760_w	-0.255	0.470833	-2.75955	0.0384489	0.749546	-3.81253
chr2@bin_3287_w	-0.253333	0.605	-5.52428	0.00248496	0.482552	-0.963125
chr3@bin_4192_c	-0.253333	0.793333	-6.4263	0.00120317	0.436075	-0.237883
chr3@bin_1695_c	-0.253333	0.576667	-3.63351	0.0142	0.642004	-2.78744
chr6@bin_1999_c	-0.253333	0.813333	-3.95693	0.0101983	0.739724	-2.45375
chr9@bin_1245_c	-0.253333	0.346667	-4.26434	0.00765044	0.691504	-2.15378
chr12@bin_1659_c	-0.253333	0.616667	-5.62887	0.00229228	0.644532	-0.875994
chr14@bin_2109_w	-0.253333	0.36	-3.21127	0.0229997	0.758007	-3.302
chr13@bin_3162_w	-0.253333	0.79	-3.35992	0.019228	0.704213	-3.09468
chr17@bin_2326_c	-0.253333	0.813333	-2.84128	0.0351244	0.754418	-3.74243
chrX@bin_106_c	-0.251667	0.274167	-4.07701	0.00635269	0.78893	-1.8784
chr9@bin_1623_c	-0.25	0.141667	-4.14222	0.00862028	0.691504	-2.28054
chr11@bin_3618_w	-0.25	0.738333	-2.69916	0.0422215	0.805417	-3.96533
chr15@bin_1463_c	-0.25	0.811667	-3.98544	0.00993216	0.704197	-2.39634
chr16@bin_396_w	-0.248333	0.529167	-2.89775	0.0333162	0.800337	-3.71379
chr19@bin_1124_w	-0.247333	0.623667	-2.96438	0.0307283	0.721675	-3.63487
chr1@bin_1750_c	-0.246667	0.793333	-5.85965	0.00187614	0.501878	-0.669421
chr3@bin_4016_c	-0.246667	0.84	-2.61464	0.0459757	0.720549	-4.02398
chr4@bin_2262_w	-0.246667	0.373333	-6.7645	0.000969079	0.3986	-0.0203915
chr8@bin_3888_c	-0.246667	0.46	-4.88391	0.00418863	0.476263	-1.49457
chr8@bin_2523_w	-0.246667	0.68	-3.00355	0.0288795	0.723708	-3.52074
chr10@bin_4028_c	-0.246667	0.273333	-3.08888	0.0260164	0.697673	-3.40378
chr12@bin_468_w	-0.246667	0.683333	-4.75461	0.00481495	0.644532	-1.64101
chr14@bin_743_c	-0.246667	0.671667	-7.88187	0.000479555	0.31249	0.654879
chr14@bin_3572_c	-0.246667	0.565533	-5.03485	0.00375615	0.675201	-1.39016
chr19@bin_2095_w	-0.246667	0.376667	-4.89397	0.00430117	0.514482	-1.54556
chr8@bin_3600_c	-0.245	0.610833	-3.47031	0.0170076	0.633233	-2.96308
chr2@bin_5379_c	-0.243333	0.855	-4.57665	0.00565097	0.53318	-1.81535
chr2@bin_2241_c	-0.243333	0.475	-2.77682	0.0381277	0.736627	-3.83258
chr7@bin_4122_c	-0.243333	0.655	-5.08594	0.00351958	0.543993	-1.34062
chr2@bin_608_w	-0.243333	0.568333	-3.3111	0.02053	0.683802	-3.1792
chr4@bin_1910_c	-0.243333	0.818333	-8.0496	0.000424368	0.278046	0.758279
chr5@bin_5319_w	-0.243333	0.598333	-3.3677	0.0191248	0.750238	-3.08792
chr9@bin_384_w	-0.243333	0.545	-3.58359	0.0153105	0.776978	-2.89228
chr14@bin_2294_c	-0.243333	0.291667	-3.34217	0.0198596	0.75379	-3.14643
chr15@bin_1682_w	-0.243333	0.585	-2.79176	0.0372727	0.817362	-3.78973
chr19@bin_1773_c	-0.243333	0.855	-5.47946	0.00262107	0.514482	-1.0287
chr2@bin_6208_c	-0.24	0.88	-9.86316	0.00016137	0.173882	1.62271
chr6@bin_1001_w	-0.24	0.463333	-3.11156	0.0255419	0.752628	-3.428
chr13@bin_1598_c	-0.24	0.656667	-2.92752	0.0315978	0.765968	-3.61759
chr14@bin_1710_w	-0.24	0.803333	-2.56862	0.0491432	0.840737	-4.10097
chr17@bin_4019_c	-0.24	0.526667	-2.6391	0.0448448	0.807462	-3.99814
chr18@bin_1864_w	-0.24	0.603333	-8.8051	0.000278089	0.146518	1.13133
chr7@bin_10_c	-0.2378	0.343333	-2.91638	0.0320519	0.747452	-3.6781
chr1@bin_2603_c	-0.236667	0.798333	-3.549	0.015692	0.623794	-2.86561
chr2@bin_4022_w	-0.236667	0.118333	-3.82139	0.0118532	0.639233	-2.59691
chr3@bin_2139_c	-0.236667	0.131667	-4.26556	0.00742882	0.555212	-2.10397
chr11@bin_1812_w	-0.236667	0.728333	-3.54098	0.0161673	0.734989	-2.94638
chr18@bin_436_c	-0.236667	0.118333	-3.58637	0.015148	0.691227	-2.82982
chr15@bin_3040_c	-0.235	0.660833	-3.30423	0.0205546	0.76659	-3.16378
chr3@bin_4472_w	-0.233333	0.806667	-3.04583	0.0274192	0.677108	-3.48239
chr9@bin_978_w	-0.233333	0.501667	-3.88121	0.0112077	0.750089	-2.55985
chr10@bin_1052_w	-0.233333	0.86	-3.09346	0.0258784	0.697673	-3.3982
chr12@bin_862_c	-0.233333	0.71	-3.01466	0.0288243	0.689126	-3.52822
chr1@bin_1956_w	-0.233333	0.71	-2.65765	0.0438366	0.771571	-3.94339
chr12@bin_1382_c	-0.233333	0.75	-5.29368	0.00301439	0.644532	-1.15605
chr14@bin_548_w	-0.233333	0.366667	-3.9011	0.0109383	0.722148	-2.51381
chr17@bin_81_w	-0.233333	0.443333	-2.59169	0.0475289	0.815073	-4.05872
chr3@bin_367_w	-0.231667	0.345833	-3.13101	0.0248411	0.67198	-3.37833
chr10@bin_3162_c	-0.231667	0.725833	-3.78478	0.0120513	0.628747	-2.59445
chr12@bin_3257_w	-0.231067	0.844433	-12.0464	6.06589e-05	0.349153	2.38576
chr1@bin_591_w	-0.23	0.708333	-3.75368	0.0126147	0.606372	-2.63585
chr1@bin_2514_c	-0.23	0.585	-3.31912	0.0202101	0.676402	-3.13204
chr2@bin_2690_c	-0.23	0.195	-3.46707	0.0172818	0.663887	-2.99665
chr5@bin_5344_c	-0.23	0.171667	-3.99834	0.00978675	0.700906	-2.38117
chr8@bin_986_w	-0.23	0.709167	-6.10371	0.00153882	0.423542	-0.477278
chr9@bin_3700_c	-0.23	0.266667	-5.14194	0.00344555	0.687846	-1.31344
chr15@bin_3965_c	-0.23	0.731667	-3.47672	0.0169803	0.76659	-2.96212
chr18@bin_2071_c	-0.23	0.868333	-2.71995	0.0407638	0.804586	-3.87025
chr3@bin_4354_c	-0.226667	0.853333	-11.8549	6.12142e-05	0.197538	2.38644
chr9@bin_3085_c	-0.226667	0.493333	-3.15808	0.0245003	0.807292	-3.39285
chr10@bin_4210_w	-0.226667	0.71	-4.06834	0.00899961	0.611241	-2.28793
chr13@bin_2290_c	-0.226667	0.342233	-3.09899	0.0258575	0.743211	-3.40688
chr5@bin_372_w	-0.225	0.6975	-8.90734	0.000258026	0.415218	1.20284
chr13@bin_2448_w	-0.225	0.580833	-3.08223	0.0263639	0.744744	-3.42729
chr18@bin_1339_w	-0.225	0.695833	-3.80461	0.0120264	0.67124	-2.58671
chr1@bin_4395_w	-0.223333	0.761667	-3.21136	0.0228211	0.692454	-3.25989
chr9@bin_3388_c	-0.223333	0.635	-4.14006	0.00863871	0.691504	-2.28281
chr1@bin_2618_w	-0.223333	0.815	-2.62105	0.0458431	0.771571	-3.98991
chr5@bin_87_w	-0.223333	0.868333	-5.56002	0.00237465	0.56986	-0.912239
chr7@bin_3755_c	-0.223333	0.558333	-3.04175	0.0276657	0.727028	-3.52255
chr8@bin_2092_w	-0.223333	0.435	-3.91765	0.0105736	0.562768	-2.46206
chr12@bin_2527_w	-0.223333	0.198333	-3.44359	0.0177617	0.672392	-3.01643
chr12@bin_3442_w	-0.221667	0.551667	-3.15362	0.0245615	0.686479	-3.35931
chr15@bin_3358_w	-0.221667	0.430833	-3.77627	0.0123226	0.749968	-2.62366
chr1@bin_4964_c	-0.22	0.226667	-2.66929	0.0432184	0.771571	-3.92862
chr2@bin_6497_c	-0.22	0.77	-2.92607	0.0319303	0.712083	-3.64603
chr4@bin_5400_c	-0.22	0.361667	-6.18096	0.00147356	0.456422	-0.431786
chr8@bin_168_c	-0.22	0.713333	-7.35745	0.000640563	0.38026	0.372911
chr9@bin_3161_w	-0.22	0.773333	-4.43094	0.00652331	0.691504	-1.98483
chr11@bin_4641_w	-0.22	0.146667	-3.66262	0.0142039	0.71968	-2.80828
chr11@bin_5440_w	-0.22	0.616667	-3.62322	0.0148086	0.734989	-2.85275
chr12@bin_1432_w	-0.22	0.89	-3.35423	0.0195997	0.672392	-3.12066
chr14@bin_2165_w	-0.218333	0.480833	-4.27254	0.00755564	0.677541	-2.1225
chrX@bin_2506_w	-0.218333	0.689167	-4.92965	0.00253927	0.78893	-1.05482
chr2@bin_6312_c	-0.2178	0.2989	-3.23356	0.0223976	0.697109	-3.27141
chr2@bin_4822_w	-0.216667	0.615	-4.51277	0.00599746	0.53318	-1.8778
chr2@bin_6233_c	-0.216667	0.351667	-3.14418	0.0247912	0.697109	-3.37885
chr3@bin_3370_c	-0.216667	0.775	-3.07243	0.0265836	0.674106	-3.44979
chr5@bin_696_c	-0.216667	0.605	-2.64528	0.0444741	0.862934	-3.97423
chr11@bin_5354_w	-0.216667	0.675	-8.97028	0.000267288	0.367712	1.20347
chr11@bin_4658_c	-0.216667	0.241667	-6.45416	0.00126132	0.405364	-0.278921
chr15@bin_279_c	-0.216667	0.161667	-5.77674	0.00200279	0.436573	-0.739458
chr16@bin_106_w	-0.216667	0.825	-7.0241	0.000851007	0.572479	0.111402
chr19@bin_1689_c	-0.216667	0.891667	-2.89298	0.0334118	0.721675	-3.72352
chr4@bin_4928_w	-0.215833	0.59625	-4.59717	0.00549481	0.54003	-1.77493
chr14@bin_103_c	-0.215	0.8325	-10.0078	0.000151079	0.137711	1.68097
chr17@bin_3961_w	-0.215	0.830833	-2.60674	0.0466585	0.815073	-4.03947
chr4@bin_4372_w	-0.213333	0.766667	-5.90841	0.00181198	0.456422	-0.638105
chr4@bin_2210_w	-0.213333	0.816667	-2.8796	0.0335891	0.750503	-3.67993
chr7@bin_2035_c	-0.213333	0.616667	-3.19522	0.0231821	0.695108	-3.33518
chr8@bin_1948_c	-0.213333	0.84	-4.76167	0.00467597	0.476488	-1.60855
chr10@bin_1957_c	-0.213333	0.56	-3.33557	0.0196325	0.688772	-3.10788
chr13@bin_1733_w	-0.213333	0.516667	-5.5434	0.00239061	0.398239	-0.920603
chr13@bin_2515_c	-0.213333	0.856667	-3.30192	0.0205176	0.727625	-3.16315
chr19@bin_2358_w	-0.213333	0.843333	-3.38032	0.0191696	0.665272	-3.13312
chr1@bin_2009_w	-0.213333	0.35	-3.06482	0.027	0.72564	-3.43662
chr2@bin_5315_w	-0.213333	0.448333	-12.4362	5.14195e-05	0.108759	2.52248
chr2@bin_2755_w	-0.213333	0.836667	-3.16617	0.0241769	0.697109	-3.35231
chr12@bin_2255_w	-0.213333	0.766667	-3.77853	0.0124182	0.649906	-2.63756
chr12@bin_1834_w	-0.213333	0.68	-2.60203	0.0471761	0.723599	-4.04501
chr18@bin_2796_c	-0.213333	0.783333	-3.0152	0.0287112	0.736972	-3.50323
chr5@bin_1989_w	-0.212	0.402	-4.26608	0.00749982	0.647846	-2.10148
chr1@bin_4854_w	-0.21	0.161667	-4.77207	0.00467105	0.561387	-1.59794
chr1@bin_3781_c	-0.21	0.633333	-2.60329	0.0468531	0.774566	-4.01253
chr3@bin_2085_w	-0.21	0.838333	-4.04186	0.00927943	0.555212	-2.33814
chr10@bin_4090_c	-0.21	0.501667	-2.73497	0.0396122	0.753984	-3.84359
chr19@bin_2478_c	-0.21	0.585	-3.09505	0.0264169	0.721675	-3.47445
chr18@bin_1975_w	-0.208333	0.295833	-2.62846	0.0455599	0.815577	-3.98611
chr1@bin_6031_c	-0.206667	0.838333	-3.01242	0.0286971	0.734063	-3.50061
chr2@bin_3596_w	-0.206667	0.783333	-7.89303	0.000474259	0.271171	0.663961
chr2@bin_614_c	-0.206667	0.306667	-2.74031	0.0398387	0.740508	-3.87862
chr4@bin_861_c	-0.206667	0.306667	-3.71353	0.0131806	0.633835	-2.69384
chr5@bin_2102_w	-0.206667	0.47	-2.75074	0.0391249	0.85177	-3.84055
chr10@bin_414_w	-0.206667	0.523333	-5.0757	0.00349948	0.578956	-1.30724
chr11@bin_5113_w	-0.206667	0.238333	-6.63858	0.00110777	0.405364	-0.149183
chr14@bin_1434_w	-0.206667	0.656667	-5.13604	0.00344274	0.658847	-1.29976
chr17@bin_173_c	-0.206667	0.62	-4.88453	0.00422356	0.439045	-1.51092
chr17@bin_2718_c	-0.206667	0.633333	-3.65511	0.0140034	0.637438	-2.77127
chr9@bin_1022_c	-0.205	0.2025	-3.16786	0.0242293	0.807292	-3.38103
chr4@bin_4093_c	-0.204433	0.400017	-4.34474	0.00697427	0.581353	-2.0241
chr4@bin_5695_c	-0.203333	0.741667	-4.5113	0.00595315	0.565718	-1.85852
chr7@bin_4782_c	-0.203333	0.58	-2.95788	0.0305198	0.737284	-3.62637
chr8@bin_457_c	-0.203333	0.795	-4.9746	0.00386496	0.471163	-1.4115
chr15@bin_682_w	-0.203333	0.853333	-4.8866	0.00421657	0.546027	-1.50066
chr19@bin_726_w	-0.203333	0.725	-3.88966	0.0111638	0.572577	-2.55649
chr19@bin_619_w	-0.203333	0.765	-3.62151	0.0147649	0.648711	-2.85468
chr2@bin_4641_w	-0.203333	0.43	-3.01487	0.0287784	0.697109	-3.53643
chr3@bin_2733_c	-0.203333	0.706667	-3.36709	0.0190066	0.642004	-3.09567
chr4@bin_2038_c	-0.203333	0.668333	-4.29675	0.00730502	0.581353	-2.07265
chr5@bin_5011_c	-0.203333	0.465	-4.78762	0.00459775	0.61433	-1.59082
chr6@bin_3833_c	-0.203333	0.291667	-4.38814	0.00665869	0.672703	-2.0027
chr10@bin_4108_w	-0.203333	0.148333	-3.0417	0.0274856	0.706829	-3.46143
chr11@bin_5200_c	-0.203333	0.248333	-2.79764	0.037523	0.785536	-3.84103
chr13@bin_1447_c	-0.203333	0.655	-3.23532	0.02212	0.732792	-3.24243
chr17@bin_2502_w	-0.203333	0.301667	-9.13073	0.000229593	0.131536	1.31468
chr18@bin_2250_c	-0.203333	0.365	-2.96527	0.0304359	0.740791	-3.56448
chr18@bin_888_c	-0.203333	0.661667	-2.60344	0.0469772	0.818699	-4.01795
chr4@bin_4607_c	-0.2022	0.776667	-9.71339	0.000170406	0.167475	1.55814
chr1@bin_4100_w	-0.201667	0.325833	-2.87294	0.0338217	0.749045	-3.67278
chr3@bin_1633_c	-0.201667	0.634167	-2.65596	0.0437024	0.720549	-3.97116
chr4@bin_5223_w	-0.201667	0.894167	-2.64496	0.0445596	0.797689	-3.9754
chr11@bin_4007_c	-0.2011	0.457217	-4.81744	0.0046367	0.618449	-1.61998
chr11@bin_1770_w	-0.200833	0.61125	-3.24105	0.0224709	0.759358	-3.29726
chr3@bin_2433_w	-0.2	0.873333	-4.01623	0.00952353	0.555212	-2.36552
chr5@bin_811_c	-0.2	0.45	-2.56736	0.0489402	0.866364	-4.07374
chr7@bin_1662_c	-0.2	0.563333	-4.58799	0.00550379	0.546733	-1.80939
chr8@bin_2595_w	-0.2	0.376667	-2.59456	0.0472147	0.762349	-4.03452
chr10@bin_3882_w	-0.2	0.7	-6.31015	0.00130079	0.496491	-0.312188
chr10@bin_492_c	-0.2	0.873333	-4.89929	0.00408886	0.578956	-1.46724
chr11@bin_1801_c	-0.2	0.456667	-4.52791	0.0060315	0.618449	-1.8974
chr16@bin_222_c	-0.2	0.646667	-3.17229	0.0242676	0.793564	-3.37762
chr18@bin_2118_c	-0.2	0.663333	-2.817	0.0362752	0.780102	-3.74839
chr19@bin_947_c	-0.2	0.446667	-5.56812	0.00244012	0.514482	-0.954704
chr4@bin_3427_w	-0.198333	0.519167	-4.9146	0.00412123	0.495785	-1.47618
chr4@bin_3590_w	-0.198333	0.6725	-4.02336	0.00957241	0.59922	-2.35666
chr10@bin_2260_c	-0.198333	0.855833	-2.79479	0.036846	0.749546	-3.76812
chr12@bin_178_w	-0.198333	0.645833	-3.20582	0.0231465	0.686479	-3.2966
chr3@bin_3971_w	-0.196667	0.901667	-3.47251	0.016913	0.642004	-2.9723
chr4@bin_3180_c	-0.196667	0.515	-5.7833	0.00199736	0.456422	-0.736024
chr4@bin_695_c	-0.196667	0.521667	-3.28187	0.0210999	0.686852	-3.19058
chr8@bin_1292_c	-0.196667	0.835	-4.57004	0.00557863	0.476488	-1.79203
chr9@bin_4019_c	-0.196667	0.626667	-6.03138	0.00168768	0.604483	-0.57741
chr9@bin_2111_c	-0.196667	0.531667	-2.65587	0.0442597	0.813382	-4.0179
chr12@bin_2219_w	-0.196667	0.835	-3.64629	0.0142728	0.672392	-2.78489
chr12@bin_848_c	-0.196667	0.835	-2.86532	0.0343494	0.696	-3.71283
chr13@bin_3491_w	-0.196667	0.525	-5.28246	0.00296742	0.398618	-1.14095
chr15@bin_3089_c	-0.196667	0.625	-2.63486	0.0450809	0.843472	-3.98828
chr19@bin_217_c	-0.196667	0.768333	-2.97286	0.0304258	0.721675	-3.62438
chr13@bin_1223_w	-0.193333	0.79	-11.1917	8.28141e-05	0.160549	2.13795
chr14@bin_446_w	-0.193333	0.87	-3.25218	0.0219619	0.758007	-3.25308
chr2@bin_5015_w	-0.193333	0.506667	-3.21026	0.0229956	0.697109	-3.29931
chr2@bin_6586_c	-0.193333	0.893333	-2.75314	0.0392278	0.739437	-3.86242
chr3@bin_3464_c	-0.193333	0.866667	-3.64067	0.0140914	0.642004	-2.77933
chr10@bin_4677_w	-0.193333	0.7125	-3.33272	0.0196953	0.688772	-3.11124
chr11@bin_1723_w	-0.193333	0.64	-3.84395	0.011761	0.674093	-2.60702
chr12@bin_2419_w	-0.193333	0.766667	-4.76405	0.00477414	0.644532	-1.63214
chr12@bin_3960_w	-0.193333	0.693333	-4.39605	0.00671283	0.647364	-1.98874
chr15@bin_930_w	-0.193333	0.853333	-2.88281	0.033433	0.81452	-3.67583
chr16@bin_152_c	-0.193333	0.31	-4.29168	0.00753154	0.609002	-2.13171
chr17@bin_456_w	-0.193333	0.82	-4.23013	0.00778089	0.548347	-2.15054
chr19@bin_2555_c	-0.192267	0.7161	-4.66854	0.00526403	0.514482	-1.75831
chr7@bin_4808_w	-0.191667	0.825833	-5.00939	0.00376225	0.543993	-1.4102
chr10@bin_1121_c	-0.191667	0.1725	-2.69511	0.041582	0.759803	-3.89411
chr13@bin_285_c	-0.191667	0.315833	-4.91634	0.00407374	0.44753	-1.46699
chr15@bin_1233_c	-0.191133	0.603333	-2.65213	0.044139	0.843472	-3.96629
chr11@bin_1974_c	-0.190667	0.674	-2.77466	0.0385655	0.797727	-3.86994
chr4@bin_3329_w	-0.190033	0.723883	-2.76097	0.0387091	0.777462	-3.8285
chr1@bin_4425_w	-0.19	0.838333	-2.82998	0.0355984	0.750783	-3.72633
chr2@bin_5621_w	-0.19	0.521667	-3.38022	0.0190123	0.67242	-3.09781
chr3@bin_4586_c	-0.19	0.545	-7.21835	0.000695628	0.436075	0.295076
chr5@bin_1759_w	-0.19	0.398333	-4.75574	0.00473234	0.61433	-1.62078
chr5@bin_410_w	-0.19	0.410833	-3.23701	0.0221454	0.784674	-3.24262
chr7@bin_2999_c	-0.19	0.598333	-3.4905	0.0166709	0.671328	-2.98489
chr11@bin_3935_c	-0.19	0.705	-5.89368	0.00190784	0.427268	-0.697992
chr11@bin_6022_c	-0.19	0.675	-4.38098	0.00692262	0.618449	-2.04332
chr15@bin_588_c	-0.19	0.595	-3.06627	0.02696	0.769036	-3.44971
chr17@bin_2479_c	-0.19	0.905	-2.90453	0.0325806	0.741264	-3.66344
chr18@bin_1691_w	-0.19	0.165	-2.72347	0.0405909	0.804586	-3.86581
chr19@bin_2112_c	-0.19	0.281667	-3.95057	0.0104929	0.572577	-2.49044
chr8@bin_2181_w	-0.188667	0.570333	-4.0506	0.0092352	0.538893	-2.3197
chrX@bin_2516_w	-0.188667	0.195667	-3.20543	0.0181534	0.807883	-2.85771
chr3@bin_191_c	-0.188333	0.3425	-4.74469	0.00472468	0.555212	-1.63026
chr10@bin_1675_c	-0.188333	0.780833	-2.6745	0.042642	0.759803	-3.92029
chr6@bin_3209_w	-0.187767	0.523883	-3.73231	0.0128749	0.739724	-2.7011
chr1@bin_1478_w	-0.186667	0.253333	-4.30981	0.00719895	0.561387	-2.04757
chr2@bin_3914_w	-0.186667	0.38	-2.86821	0.0341896	0.720429	-3.71801
chr2@bin_907_c	-0.186667	0.486667	-2.73144	0.0402672	0.741407	-3.88984
chr3@bin_3852_w	-0.186667	0.706667	-2.98709	0.0293709	0.689593	-3.55477
chr4@bin_3744_w	-0.186667	0.246667	-3.6769	0.0137019	0.633835	-2.73479
chr10@bin_1821_c	-0.186667	0.366667	-3.59949	0.0146821	0.670707	-2.80213
chr13@bin_2023_w	-0.186667	0.87	-8.52287	0.000316292	0.306592	1.02212
chr13@bin_2615_w	-0.186667	0.736667	-4.14828	0.00838213	0.576915	-2.2196
chr14@bin_1417_w	-0.186667	0.731667	-2.62774	0.0457109	0.828246	-4.02542
chr17@bin_75_w	-0.186667	0.745	-2.89186	0.0330735	0.742228	-3.67922
chr19@bin_2622_w	-0.186667	0.655	-3.51641	0.0165252	0.662613	-2.97483
chrY@bin_22_w	-0.186667	0.796667	-3.05691	0.0223073	0.117438	-3.33387
chr5@bin_3452_w	-0.185533	0.780567	-2.67095	0.043102	0.859341	-3.94159
chr3@bin_344_w	-0.185	0.9075	-7.97725	0.000430766	0.436075	0.74575
chr4@bin_1411_c	-0.185	0.764167	-3.67509	0.0137283	0.633835	-2.73682
chr15@bin_1741_c	-0.185	0.6975	-3.2044	0.0230071	0.76659	-3.28267
chr13@bin_3334_c	-0.184467	0.69	-5.59568	0.0022914	0.398239	-0.877611
chr3@bin_447_w	-0.183333	0.751667	-3.62227	0.0143724	0.642004	-2.8002
chr4@bin_6266_c	-0.183333	0.8839	-3.51179	0.0163626	0.660278	-2.92215
chr11@bin_2737_w	-0.183333	0.908333	-6.77414	0.00100885	0.405364	-0.0562539
chr11@bin_3741_w	-0.183333	0.778333	-3.75059	0.012953	0.681623	-2.70995
chr11@bin_1715_w	-0.183333	0.661667	-2.8728	0.0343258	0.77705	-3.74696
chr14@bin_1988_w	-0.183333	0.161667	-2.79301	0.0374332	0.773328	-3.81609
chr19@bin_2154_c	-0.183333	0.4275	-5.34001	0.00293847	0.514482	-1.14729
chr1@bin_1905_w	-0.183333	0.558333	-7.80687	0.000489511	0.329403	0.62196
chr2@bin_5029_w	-0.183333	0.438333	-2.68266	0.0427152	0.741407	-3.95164
chr4@bin_4795_c	-0.183333	0.871667	-6.44232	0.00121673	0.3986	-0.242587
chr8@bin_1345_c	-0.183333	0.605	-3.19066	0.0232603	0.688651	-3.29313
chr10@bin_2025_w	-0.183333	0.778333	-5.04108	0.00360691	0.578956	-1.33827
chr11@bin_3320_c	-0.183333	0.655	-3.45301	0.01778	0.741219	-3.04778
chr11@bin_5767_c	-0.183333	0.368333	-3.19939	0.0235489	0.759358	-3.34713
chr11@bin_980_c	-0.183333	0.598333	-3.1222	0.0257036	0.759358	-3.44024
chr12@bin_1457_c	-0.183333	0.701667	-4.25575	0.007682	0.647364	-2.13052
chr12@bin_2012_c	-0.183333	0.358333	-4.022	0.00967824	0.647364	-2.37406
chr15@bin_3846_c	-0.183333	0.363333	-3.63083	0.0143729	0.76659	-2.7861
chr16@bin_1455_c	-0.183333	0.408333	-6.51629	0.00120506	0.572479	-0.233139
chr2@bin_5828_c	-0.1825	0.457083	-4.26536	0.00759246	0.553862	-2.12595
chr15@bin_2189_c	-0.1822	0.387767	-2.97994	0.0298135	0.779268	-3.55553
chr5@bin_228_w	-0.181667	0.610833	-4.72668	0.00485901	0.61433	-1.64822
chr9@bin_3965_c	-0.181667	0.544167	-9.89351	0.000161656	0.471685	1.64483
chr15@bin_296_c	-0.181667	0.799167	-3.07463	0.0267003	0.76659	-3.43952
chr18@bin_486_c	-0.181667	0.624167	-3.11668	0.0255314	0.732877	-3.37985
chr1@bin_5624_c	-0.18	0.56	-3.90293	0.0108023	0.604702	-2.47279
chr2@bin_169_w	-0.18	0.78	-4.91339	0.00416664	0.517002	-1.49691
chr2@bin_5033_c	-0.18	0.65	-3.38027	0.0190111	0.67242	-3.09775
chr4@bin_5879_w	-0.18	0.866667	-8.21072	0.000385774	0.278046	0.845073
chr4@bin_5680_c	-0.18	0.606667	-3.35882	0.0193604	0.686852	-3.09977
chr4@bin_6480_w	-0.18	0.546667	-3.06731	0.0269532	0.718773	-3.44863
chr7@bin_1344_c	-0.18	0.586667	-3.32135	0.0201027	0.684865	-3.18386
chr8@bin_3888_w	-0.18	0.45	-3.55792	0.0154578	0.627439	-2.8623
chr10@bin_1007_c	-0.18	0.773333	-6.40545	0.00121296	0.488689	-0.243652
chr10@bin_1588_w	-0.18	0.89	-2.62055	0.0455602	0.773929	-3.98905
chr12@bin_1948_c	-0.18	0.133333	-4.6493	0.00529905	0.646009	-1.74099
chr14@bin_3621_w	-0.18	0.608333	-3.81308	0.0119769	0.722148	-2.60996
chr16@bin_2772_c	-0.18	0.44	-4.12225	0.00888163	0.609002	-2.30685
chr8@bin_3504_c	-0.178333	0.755833	-3.44185	0.0175482	0.633233	-2.99608
chr17@bin_3653_c	-0.178333	0.579167	-3.20654	0.0229489	0.706996	-3.29393
chr2@bin_5855_c	-0.178333	0.640833	-3.78646	0.0122914	0.643674	-2.63538
chr2@bin_5768_c	-0.178333	0.620833	-2.59684	0.0474288	0.745151	-4.06099
chr4@bin_4227_c	-0.178333	0.729167	-15.4038	1.71587e-05	0.0645757	3.20662
chr13@bin_555_w	-0.178333	0.3325	-4.88211	0.00419978	0.452332	-1.49851
chr2@bin_5237_c	-0.176667	0.785	-3.50996	0.0164934	0.663887	-2.94714
chr2@bin_1173_w	-0.176667	0.721667	-2.58511	0.0481158	0.745151	-4.07599
chr3@bin_1371_w	-0.176667	0.721667	-3.76659	0.0123268	0.639335	-2.63792
chr3@bin_1362_c	-0.176667	0.668333	-3.08235	0.0262789	0.674106	-3.43765
chr3@bin_735_c	-0.176667	0.581667	-3.01778	0.0283328	0.679777	-3.51691
chr3@bin_800_w	-0.176667	0.845	-2.61631	0.0458816	0.720549	-4.02185
chr4@bin_6011_c	-0.176667	0.446667	-5.33701	0.00286636	0.49422	-1.10268
chr4@bin_654_c	-0.176667	0.471667	-2.94812	0.0309766	0.737155	-3.59493
chr8@bin_1345_w	-0.176667	0.554167	-4.62127	0.00531895	0.476488	-1.7424
chr9@bin_649_c	-0.176667	0.885	-7.16751	0.000758893	0.604483	0.219861
chr9@bin_200_c	-0.176667	0.458333	-5.93314	0.00181854	0.604483	-0.653498
chr10@bin_1362_w	-0.176667	0.911667	-3.13318	0.0247162	0.695299	-3.34995
chr12@bin_3644_c	-0.176667	0.605	-4.52396	0.00595051	0.647364	-1.86231
chr12@bin_3046_w	-0.176667	0.445	-2.88696	0.0334801	0.696	-3.68588
chr16@bin_2774_w	-0.176667	0.701667	-2.8336	0.0359375	0.809241	-3.79384
chr18@bin_499_c	-0.176667	0.878333	-7.18832	0.000734459	0.249621	0.246235
chr19@bin_612_c	-0.176667	0.355	-5.24905	0.00316976	0.514482	-1.22615
chr19@bin_1944_w	-0.176667	0.691667	-2.80859	0.0369249	0.721675	-3.82917
chr2@bin_714_c	-0.175567	0.672217	-3.01113	0.0289038	0.697109	-3.54102
chr4@bin_6269_c	-0.175533	0.597767	-4.09324	0.00892407	0.581353	-2.28287
chr2@bin_6800_w	-0.175	0.7075	-3.71205	0.013288	0.643674	-2.71802
chr17@bin_118_w	-0.174433	0.912783	-3.63797	0.014262	0.637438	-2.79063
chr1@bin_4206_c	-0.174433	0.80945	-2.74208	0.0395647	0.771571	-3.83662
chr19@bin_754_w	-0.174433	0.56275	-3.14053	0.0250787	0.721675	-3.4192
chr9@bin_2897_c	-0.1744	0.690567	-2.7328	0.0403267	0.813382	-3.92011
chr11@bin_2150_w	-0.173333	0.641667	-3.87446	0.0113991	0.674093	-2.5737
chr14@bin_1928_c	-0.173333	0.913333	-3.94299	0.0104806	0.722148	-2.46852
chr18@bin_2769_c	-0.173333	0.828333	-5.94015	0.00178095	0.383204	-0.616221
chr1@bin_912_c	-0.173333	0.83	-2.82886	0.0356464	0.750783	-3.72773
chr2@bin_1628_c	-0.173333	0.323333	-3.13705	0.0249944	0.697109	-3.38749
chr3@bin_809_c	-0.173333	0.433333	-2.59905	0.0468669	0.720549	-4.04396
chr5@bin_4122_w	-0.173333	0.131667	-3.20547	0.0229526	0.784674	-3.28037
chr8@bin_2557_w	-0.173333	0.593333	-3.56724	0.0153026	0.627439	-2.85166
chr9@bin_2892_c	-0.173333	0.595	-4.15637	0.00850101	0.691504	-2.26574
chr12@bin_475_w	-0.173333	0.843333	-4.3406	0.00707796	0.647364	-2.04439
chr13@bin_658_w	-0.173333	0.781667	-2.63423	0.0449853	0.802191	-3.98684
chr16@bin_2759_c	-0.173333	0.83	-3.12277	0.0256727	0.793564	-3.43745
chr16@bin_826_w	-0.173333	0.313333	-2.9552	0.031148	0.793564	-3.64256
chr18@bin_2711_c	-0.173333	0.741667	-4.09787	0.00892196	0.616342	-2.27282
chr2@bin_1214_w	-0.172233	0.393883	-2.73773	0.039963	0.741079	-3.88189
chr2@bin_1676_w	-0.171667	0.390833	-2.66732	0.0435186	0.741407	-3.97113
chr12@bin_1603_c	-0.171667	0.8475	-2.96171	0.0306612	0.689126	-3.59332
chr3@bin_1307_w	-0.171067	0.7689	-2.70143	0.041342	0.720549	-3.91322
chr1@bin_1994_c	-0.17	0.901667	-7.54108	0.000577641	0.337723	0.469132
chr1@bin_593_w	-0.17	0.578333	-3.76348	0.0124855	0.606372	-2.62502
chr1@bin_4366_c	-0.17	0.868333	-3.31005	0.0204164	0.676414	-3.14272
chr1@bin_2206_w	-0.17	0.868333	-3.08976	0.0262322	0.72564	-3.40632
chr2@bin_5354_c	-0.17	0.665	-3.61662	0.0147039	0.653613	-2.82536
chr4@bin_250_w	-0.17	0.818333	-2.80903	0.036538	0.762555	-3.76811
chr5@bin_5314_w	-0.17	0.675	-4.68031	0.00506944	0.61433	-1.6923
chr5@bin_3829_w	-0.17	0.538333	-3.39696	0.0185138	0.750238	-3.05365
chr5@bin_1268_c	-0.17	0.68	-2.68613	0.0423123	0.859341	-3.92231
chr6@bin_3880_c	-0.17	0.843333	-4.41731	0.00647564	0.672703	-1.97329
chr8@bin_409_w	-0.17	0.584333	-5.48269	0.00250908	0.454855	-0.968984
chr8@bin_3562_c	-0.17	0.635	-2.78562	0.0374119	0.74986	-3.79202
chr9@bin_3341_w	-0.17	0.111667	-4.83649	0.00449643	0.691504	-1.59225
chr9@bin_3731_w	-0.17	0.795	-4.27095	0.00760167	0.691504	-2.147
chr9@bin_871_c	-0.17	0.788333	-3.64317	0.0143678	0.752103	-2.82454
chr9@bin_4054_w	-0.17	0.465	-2.60673	0.0469912	0.82135	-4.08068
chr10@bin_653_w	-0.17	0.323333	-2.86406	0.0339062	0.74495	-3.68128
chr11@bin_1357_w	-0.17	0.776667	-5.11909	0.00356608	0.55897	-1.34475
chr11@bin_3643_c	-0.17	0.0916667	-4.04426	0.00960349	0.646725	-2.39112
chr11@bin_5612_w	-0.17	0.861667	-2.77027	0.038768	0.797727	-3.87546
chr12@bin_2070_c	-0.17	0.621667	-4.08257	0.00910892	0.647364	-2.31007
chr14@bin_3080_w	-0.17	0.258333	-2.59513	0.0475705	0.840737	-4.06705
chr17@bin_3707_c	-0.17	0.461667	-3.81569	0.0118242	0.600939	-2.59229
chr17@bin_989_c	-0.17	0.875	-3.78284	0.0122367	0.6035	-2.62856
chr18@bin_2068_c	-0.17	0.441667	-9.41266	0.00020104	0.146518	1.40988
chr18@bin_694_w	-0.17	0.578333	-3.24263	0.0221203	0.723784	-3.22888
chr3@bin_2738_c	-0.1689	0.902217	-2.77225	0.0379391	0.720173	-3.82342
chr11@bin_4868_c	-0.168867	0.425567	-12.0675	6.30072e-05	0.197088	2.40921
chr3@bin_2721_c	-0.168667	0.801	-2.92701	0.0315283	0.692267	-3.6293
chr1@bin_3142_c	-0.168333	0.6325	-2.93902	0.0312771	0.735738	-3.59088
chr17@bin_3921_w	-0.168333	0.8925	-7.44616	0.000613773	0.24175	0.417811
chr3@bin_2133_c	-0.168333	0.6425	-6.28862	0.00133082	0.436075	-0.33778
chr7@bin_984_c	-0.168333	0.205833	-2.62228	0.0456897	0.804783	-4.05069
chr18@bin_2085_w	-0.168333	0.5125	-3.4619	0.0173365	0.715458	-2.97208
chr2@bin_3972_w	-0.167767	0.893883	-9.78201	0.000168023	0.173882	1.58858
chr11@bin_2883_w	-0.1675	0.49875	-3.08598	0.02679	0.759358	-3.48422
chr13@bin_3069_w	-0.1675	0.582917	-2.88241	0.0333342	0.771884	-3.6737
chr17@bin_766_w	-0.1675	0.570417	-3.2163	0.0226958	0.706996	-3.28221
chr1@bin_3384_w	-0.166667	0.916667	-6.93573	0.000858709	0.441493	0.0953414
chr1@bin_3609_c	-0.166667	0.423333	-5.58955	0.00232364	0.529501	-0.884207
chr1@bin_4709_w	-0.166667	0.883333	-3.79585	0.0120696	0.604702	-2.58939
chr2@bin_581_w	-0.166667	0.35	-6.90028	0.000895938	0.312838	0.057429
chr2@bin_2937_w	-0.166667	0.786667	-2.90669	0.0326678	0.715693	-3.67008
chr4@bin_663_w	-0.166667	0.59	-5.26928	0.00303382	0.495785	-1.16078
chr4@bin_2963_c	-0.166667	0.878333	-4.40176	0.0066035	0.570518	-1.9669
chr6@bin_3748_w	-0.166667	0.806667	-4.12237	0.0086318	0.683063	-2.27703
chr6@bin_874_c	-0.166667	0.896667	-2.67176	0.0430396	0.79829	-3.9776
chr7@bin_1525_c	-0.166667	0.603333	-3.16504	0.0239951	0.695108	-3.37174
chr8@bin_2092_c	-0.166667	0.223333	-3.68071	0.0135479	0.606551	-2.72322
chr8@bin_4015_w	-0.166667	0.19	-3.20384	0.0229134	0.688651	-3.2773
chr10@bin_545_w	-0.166667	0.876667	-2.85352	0.0343364	0.74495	-3.69446
chr16@bin_1451_w	-0.166667	0.884467	-3.41705	0.0184792	0.765392	-3.08751
chr18@bin_1194_w	-0.166667	0.85	-4.06549	0.00921515	0.616342	-2.30675
chr19@bin_2010_w	-0.166667	0.183333	-3.31531	0.0205995	0.665272	-3.20978
chr17@bin_1751_w	-0.165567	0.505017	-2.85206	0.0346757	0.751404	-3.72893
chr1@bin_233_w	-0.165	0.819167	-2.57938	0.0482509	0.774566	-4.04303
chr2@bin_4590_w	-0.165	0.7675	-9.25013	0.000220674	0.174706	1.35441
chr3@bin_2540_w	-0.165	0.754167	-2.83366	0.0352374	0.708959	-3.74604
chr4@bin_4522_w	-0.165	0.420833	-3.85475	0.0113718	0.633835	-2.53813
chr7@bin_1197_w	-0.165	0.899167	-7.3749	0.000636987	0.439125	0.383329
chr16@bin_2940_w	-0.165	0.259167	-4.25522	0.00780079	0.609002	-2.16899
chr7@bin_4663_c	-0.164433	0.568883	-3.16745	0.0239291	0.695108	-3.36882
chr1@bin_812_c	-0.163333	0.738333	-6.51052	0.00115474	0.441493	-0.190476
chr3@bin_4123_c	-0.163333	0.735	-3.69858	0.0132464	0.642004	-2.71396
chr8@bin_3390_c	-0.163333	0.886667	-4.47526	0.00609869	0.476488	-1.88497
chr9@bin_3703_c	-0.163333	0.688333	-5.18772	0.00331405	0.687846	-1.27285
chr11@bin_6077_w	-0.163333	0.618333	-3.14046	0.0251745	0.759358	-3.41813
chr13@bin_394_w	-0.163333	0.718333	-4.77454	0.00462644	0.46246	-1.59878
chr13@bin_1512_w	-0.163333	0.918333	-4.72257	0.00485043	0.46246	-1.64787
chr16@bin_1707_c	-0.163333	0.918333	-6.14663	0.00157464	0.572479	-0.502372
chr1@bin_1056_c	-0.163333	0.385	-3.98869	0.00989658	0.604702	-2.38083
chr1@bin_5732_c	-0.163333	0.358333	-3.60065	0.0148418	0.623794	-2.80696
chr2@bin_5436_c	-0.163333	0.531667	-3.18154	0.0237576	0.697109	-3.3338
chr3@bin_2063_c	-0.163333	0.833333	-2.88395	0.0331827	0.692267	-3.68301
chr5@bin_5477_c	-0.163333	0.365	-3.4878	0.0167535	0.74481	-2.94818
chr7@bin_3402_c	-0.163333	0.875	-4.20123	0.00797021	0.585499	-2.20075
chr7@bin_3674_c	-0.163333	0.531667	-3.56508	0.0153722	0.668356	-2.89864
chr8@bin_4158_w	-0.163333	0.898333	-6.39418	0.00124069	0.423542	-0.264323
chr9@bin_2525_c	-0.163333	0.811667	-3.08857	0.0265285	0.807292	-3.47732
chr11@bin_2691_w	-0.163333	0.471667	-3.23628	0.0225915	0.759358	-3.30296
chr12@bin_937_w	-0.163333	0.661667	-3.59455	0.0150829	0.672392	-2.84334
chr12@bin_2353_w	-0.163333	0.525833	-3.14072	0.024926	0.686479	-3.37487
chr15@bin_2671_w	-0.163333	0.661667	-4.0649	0.00916675	0.702745	-2.31194
chr18@bin_1031_w	-0.163333	0.688333	-2.9192	0.0321304	0.751563	-3.62131
chr4@bin_4261_c	-0.161667	0.246667	-2.67968	0.0427127	0.796194	-3.93128
chr6@bin_993_c	-0.161667	0.445833	-4.14961	0.00840123	0.683026	-2.24837
chr7@bin_4431_w	-0.161667	0.489167	-4.74798	0.00475064	0.543993	-1.65457
chr8@bin_149_c	-0.161667	0.629167	-3.5535	0.015532	0.627439	-2.86735
chr9@bin_1935_w	-0.161667	0.825833	-5.95839	0.0017838	0.604483	-0.633825
chr12@bin_913_w	-0.161667	0.465833	-5.32367	0.00293989	0.644532	-1.13034
chr14@bin_1581_c	-0.161667	0.5675	-5.30309	0.00298957	0.629219	-1.15385
chr1@bin_2771_c	-0.161133	0.607233	-3.86459	0.0112378	0.604702	-2.51432
chr16@bin_680_w	-0.1611	0.553917	-2.82182	0.0364431	0.809241	-3.80859
chr2@bin_5357_c	-0.160033	0.66445	-2.64957	0.0444692	0.741407	-3.99372
chr2@bin_788_c	-0.16	0.853333	-3.06643	0.0271084	0.697109	-3.47331
chr2@bin_1361_w	-0.16	0.793333	-3.03747	0.0280329	0.697109	-3.50872
chr2@bin_6032_w	-0.16	0.748333	-2.76226	0.0388001	0.737521	-3.85092
chr4@bin_925_c	-0.16	0.236667	-3.04118	0.0277827	0.724267	-3.48053
chr4@bin_323_c	-0.16	0.408333	-2.57109	0.0487859	0.820095	-4.06965
chr6@bin_2771_w	-0.16	0.653333	-3.06801	0.0268609	0.752628	-3.48127
chr6@bin_1017_c	-0.16	0.84	-2.93352	0.0314375	0.770998	-3.64745
chr7@bin_3951_w	-0.16	0.778333	-7.44647	0.000608346	0.439125	0.427658
chr7@bin_3281_c	-0.16	0.543333	-3.03372	0.0279256	0.727028	-3.53244
chr7@bin_3300_w	-0.16	0.43	-2.58636	0.0477525	0.804783	-4.09684
chr8@bin_2334_c	-0.16	0.386667	-4.51372	0.00588118	0.476488	-1.84708
chr8@bin_346_w	-0.16	0.28	-2.66854	0.0431195	0.762349	-3.94017
chr10@bin_4142_w	-0.16	0.533333	-4.78419	0.00453554	0.595307	-1.57423
chr11@bin_4669_w	-0.16	0.306667	-2.60732	0.0471919	0.821532	-4.08219
chr13@bin_180_c	-0.16	0.81	-2.84821	0.0347211	0.771884	-3.71641
chr16@bin_2983_c	-0.16	0.515	-5.57986	0.00243536	0.572479	-0.948212
chr18@bin_982_w	-0.16	0.746667	-5.41464	0.00270485	0.394723	-1.03721
chr18@bin_1613_w	-0.16	0.655	-2.70718	0.0413985	0.804586	-3.88636
chr19@bin_1442_c	-0.16	0.893333	-4.1312	0.00875991	0.572577	-2.29823
chr2@bin_5440_c	-0.1589	0.657217	-2.60154	0.0471563	0.745151	-4.05498
chr14@bin_890_w	-0.158333	0.7925	-3.74812	0.0128159	0.722148	-2.68176
chrX@bin_1427_w	-0.158333	0.445833	-2.94311	0.025463	0.833766	-3.17758
chr1@bin_1712_c	-0.158333	0.299167	-4.11582	0.00870919	0.577182	-2.2468
chr1@bin_984_w	-0.158333	0.665833	-3.83943	0.0115345	0.604702	-2.54171
chr2@bin_597_w	-0.158333	0.1475	-4.13604	0.00861838	0.55897	-2.25971
chr6@bin_2872_w	-0.158333	0.314167	-3.1242	0.0251727	0.752628	-3.41259
chr14@bin_1472_c	-0.158333	0.330833	-2.59332	0.0476763	0.840737	-4.06937
chr19@bin_180_c	-0.158333	0.494167	-3.17435	0.0241327	0.717037	-3.37831
chr2@bin_935_c	-0.157767	0.448883	-6.85991	0.000920888	0.312838	0.0306624
chr2@bin_4849_c	-0.157767	0.50555	-2.80568	0.0368323	0.734215	-3.79628
chr15@bin_1120_c	-0.1567	0.856117	-2.70917	0.0411793	0.837937	-3.89391
chr1@bin_1828_c	-0.156667	0.87	-9.68846	0.000171723	0.272725	1.53803
chr1@bin_6022_w	-0.156667	0.291667	-3.77744	0.0123042	0.604702	-2.60963
chr1@bin_3596_w	-0.156667	0.866667	-3.25442	0.0217346	0.686406	-3.20857
chr1@bin_204_w	-0.156667	0.798333	-2.6836	0.0424721	0.771571	-3.9105
chr2@bin_6002_c	-0.156667	0.695	-4.60523	0.00550349	0.53318	-1.78762
chr3@bin_76_w	-0.156667	0.831667	-2.87231	0.0336463	0.692267	-3.69757
chr4@bin_5171_w	-0.156667	0.885	-4.6597	0.00518664	0.525508	-1.71481
chr5@bin_1590_c	-0.156667	0.875	-3.68882	0.0134924	0.71448	-2.71966
chr7@bin_3616_c	-0.156667	0.855	-3.43373	0.0177427	0.673548	-3.05115
chr7@bin_1355_w	-0.156667	0.921667	-2.97266	0.0299939	0.734627	-3.608
chr7@bin_339_w	-0.156667	0.488333	-2.77486	0.0379534	0.782761	-3.85615
chr7@bin_4612_w	-0.156667	0.601667	-2.55566	0.0495958	0.804783	-4.13636
chr8@bin_393_w	-0.156667	0.903333	-6.93648	0.00084709	0.38163	0.106779
chr8@bin_3542_w	-0.156667	0.435	-2.56121	0.0491977	0.767548	-4.07722
chr9@bin_3522_c	-0.156667	0.732333	-4.74604	0.00487628	0.691504	-1.67755
chr9@bin_988_w	-0.156667	0.5261	-4.22506	0.00794799	0.691504	-2.19429
chr9@bin_495_w	-0.156667	0.678333	-2.92179	0.0322052	0.813382	-3.68282
chr9@bin_3863_w	-0.156667	0.381667	-2.75175	0.039418	0.813382	-3.89612
chr9@bin_1901_c	-0.156667	0.278333	-2.66698	0.0436661	0.813382	-4.00373
chr10@bin_656_w	-0.156667	0.718333	-4.9858	0.00378652	0.578956	-1.38818
chr11@bin_69_w	-0.156667	0.118333	-3.50768	0.0167574	0.737665	-2.98462
chr11@bin_5447_c	-0.156667	0.598333	-3.042	0.0281794	0.759358	-3.53791
chr12@bin_423_c	-0.156667	0.905	-4.1567	0.00846371	0.647364	-2.2326
chr13@bin_3854_c	-0.156667	0.881667	-2.85607	0.0343968	0.771884	-3.70658
chr14@bin_2543_c	-0.156667	0.358333	-2.87139	0.0340976	0.773328	-3.71793
chr19@bin_611_w	-0.156667	0.448333	-2.55942	0.0499081	0.754209	-4.14584
chr9@bin_1952_c	-0.155833	0.20875	-3.64533	0.0143348	0.752103	-2.82209
chr1@bin_5653_w	-0.155533	0.7278	-4.84915	0.00435814	0.561387	-1.52633
chr2@bin_5260_w	-0.155	0.339167	-2.66817	0.0434738	0.741407	-3.97005
chr2@bin_3507_c	-0.155	0.5975	-2.62212	0.0459835	0.745077	-4.0287
chr6@bin_3510_w	-0.155	0.1725	-3.81368	0.011822	0.739724	-2.61051
chr14@bin_443_c	-0.155	0.8725	-5.56824	0.0024054	0.629219	-0.930454
chr17@bin_2418_c	-0.155	0.5475	-3.49428	0.0166557	0.678771	-2.95487
chr18@bin_623_w	-0.155	0.8675	-4.91988	0.00412542	0.445863	-1.46953
chr17@bin_3623_w	-0.154467	0.4539	-3.20937	0.0228752	0.706996	-3.29053
chr16@bin_2201_c	-0.154167	0.612917	-3.94224	0.0106311	0.618119	-2.49819
chr2@bin_3189_w	-0.153333	0.896667	-3.07959	0.0266997	0.697109	-3.45725
chr4@bin_5146_w	-0.153333	0.623333	-5.3454	0.00284636	0.49422	-1.09552
chr12@bin_3186_c	-0.153333	0.646667	-2.8344	0.0356343	0.696	-3.75141
chr13@bin_295_w	-0.153333	0.75	-2.64752	0.0442589	0.802191	-3.96989
chr18@bin_1266_c	-0.153333	0.9	-5.35111	0.00285088	0.394723	-1.0907
chr19@bin_1828_c	-0.153333	0.775567	-3.06599	0.0273137	0.721675	-3.50991
chr2@bin_271_w	-0.153333	0.416667	-4.04691	0.00941841	0.576875	-2.35353
chr2@bin_2507_w	-0.153333	0.876667	-2.69563	0.0420487	0.741407	-3.93518
chr5@bin_3476_w	-0.153333	0.291667	-3.15227	0.0243896	0.799085	-3.34437
chr6@bin_3510_c	-0.153333	0.191667	-5.49535	0.00249937	0.494458	-0.980284
chr6@bin_2266_c	-0.153333	0.83	-2.63694	0.0449099	0.79829	-4.0221
chr7@bin_4594_w	-0.153333	0.45	-3.62073	0.0144779	0.65953	-2.83489
chr7@bin_3360_w	-0.153333	0.573333	-2.85888	0.0343175	0.762058	-3.75013
chr8@bin_870_c	-0.153333	0.403333	-3.52229	0.0160679	0.633233	-2.90313
chr8@bin_3594_c	-0.153333	0.434467	-3.09968	0.0258235	0.703539	-3.40316
chr9@bin_3382_w	-0.153333	0.663333	-2.87272	0.0341237	0.813382	-3.74399
chr9@bin_3584_w	-0.153333	0.436667	-2.6004	0.047356	0.82135	-4.08877
chr10@bin_2768_c	-0.153333	0.686667	-5.23338	0.00305489	0.568054	-1.16825
chr10@bin_873_w	-0.153333	0.856667	-4.43805	0.00626099	0.611241	-1.90876
chr12@bin_3012_c	-0.153333	0.646667	-3.58467	0.0152436	0.672392	-2.85456
chr12@bin_2744_w	-0.153333	0.803333	-2.79721	0.0372513	0.696	-3.79799
chr12@bin_3686_w	-0.153333	0.24	-2.56916	0.049117	0.723599	-4.087
chr14@bin_2508_c	-0.153333	0.656667	-3.29351	0.0209667	0.75379	-3.20394
chr18@bin_1472_c	-0.153333	0.166667	-3.01666	0.0286627	0.736972	-3.50145
chrX@bin_2004_w	-0.153333	0.55	-4.61874	0.00350501	0.78893	-1.33989
chr16@bin_2645_c	-0.152667	0.497	-4.15339	0.00861382	0.609002	-2.2743
chr9@bin_3086_c	-0.152167	0.563883	-2.6761	0.043186	0.813382	-3.99212
chr1@bin_2740_w	-0.151667	0.3875	-4.21658	0.0078836	0.561387	-2.14253
chr2@bin_6710_w	-0.151667	0.515833	-2.99915	0.0293102	0.697109	-3.55576
chr13@bin_249_w	-0.151667	0.7325	-3.38494	0.0187001	0.704213	-3.0653
chr14@bin_2132_c	-0.151667	0.6325	-3.83682	0.0116861	0.722148	-2.58389
chr16@bin_397_c	-0.151667	0.624167	-4.46651	0.00638049	0.609002	-1.95595
chr17@bin_214_c	-0.151667	0.719167	-5.02367	0.00373619	0.418212	-1.38368
chr1@bin_2004_w	-0.151333	0.413667	-2.79463	0.0371384	0.757311	-3.77057
chr4@bin_4078_c	-0.151133	0.7011	-5.05314	0.00364976	0.495785	-1.35072
chr19@bin_1768_w	-0.151133	0.727767	-4.4153	0.00665849	0.528838	-2.0069
chr1@bin_2618_c	-0.15	0.733333	-3.72116	0.0130541	0.607323	-2.67187
chr2@bin_725_c	-0.15	0.408333	-2.66584	0.0435968	0.741407	-3.97301
chr2@bin_3587_w	-0.15	0.901667	-2.59214	0.0477028	0.745151	-4.067
chr4@bin_1804_c	-0.15	0.925	-9.90497	0.000154836	0.167475	1.63789
chr4@bin_6184_c	-0.15	0.345	-3.6828	0.0136165	0.633835	-2.72818
chr4@bin_5400_w	-0.15	0.475	-3.27265	0.0213199	0.686852	-3.20152
chr5@bin_1462_w	-0.15	0.881667	-3.72437	0.012994	0.71448	-2.67995
chr5@bin_636_w	-0.15	0.885	-2.82239	0.0358962	0.832131	-3.75045
chr6@bin_3835_c	-0.15	0.595	-2.83816	0.0352072	0.777653	-3.76677
chr8@bin_4193_c	-0.15	0.831667	-3.85327	0.0113007	0.573481	-2.53208
chr9@bin_1210_w	-0.15	0.248333	-2.56978	0.049166	0.822748	-4.12802
chr10@bin_4546_c	-0.15	0.825	-5.94278	0.00171708	0.541402	-0.586913
chr11@bin_1230_w	-0.15	0.831667	-5.07757	0.00369483	0.55897	-1.38182
chr11@bin_954_w	-0.15	0.835	-2.82081	0.0365037	0.77705	-3.81196
chr11@bin_3478_w	-0.15	0.385	-2.69812	0.0422742	0.805417	-3.96664
chr12@bin_4003_w	-0.15	0.821667	-3.42618	0.0181038	0.672392	-3.03663
chr12@bin_3352_c	-0.15	0.305	-3.00002	0.0293198	0.689126	-3.54619
chr13@bin_1950_w	-0.15	0.241667	-3.23984	0.022007	0.732792	-3.23703
chr14@bin_1762_w	-0.15	0.495	-3.0827	0.026637	0.764042	-3.45737
chr15@bin_3141_w	-0.15	0.0916667	-3.12873	0.0250854	0.76659	-3.37382
chr15@bin_661_c	-0.15	0.5939	-3.09232	0.0261596	0.76659	-3.41798
chr16@bin_818_w	-0.15	0.91	-5.47747	0.00264453	0.572479	-1.03331
chr17@bin_2109_c	-0.15	0.655	-3.80743	0.0119264	0.601283	-2.60139
chr17@bin_213_w	-0.15	0.208333	-3.34497	0.0196373	0.683689	-3.12915
chr17@bin_3574_w	-0.15	0.753333	-2.64131	0.0447237	0.807462	-3.99532
chr19@bin_1844_c	-0.15	0.718333	-3.37775	0.0192239	0.665272	-3.13613
chr5@bin_5320_c	-0.149967	0.724983	-4.42345	0.00644484	0.647846	-1.94271
chr19@bin_2473_c	-0.1489	0.50665	-2.66799	0.0437196	0.734805	-4.00705
chr9@bin_3500_c	-0.148867	0.5028	-2.78069	0.0380734	0.813382	-3.85957
chr9@bin_2430_w	-0.148333	0.830833	-8.41113	0.000354757	0.471685	0.943045
chr11@bin_4148_c	-0.148333	0.7925	-2.73083	0.0406432	0.805417	-3.92523
chr6@bin_2751_w	-0.148333	0.284167	-3.48067	0.016872	0.739724	-2.98824
chr15@bin_2081_c	-0.148333	0.719167	-4.02033	0.0095874	0.70297	-2.35915
chr2@bin_1803_w	-0.1475	0.67875	-2.68775	0.0424525	0.741407	-3.94518
chr1@bin_3825_w	-0.146667	0.708333	-2.83602	0.0353425	0.750783	-3.71878
chr2@bin_3346_w	-0.146667	0.233333	-3.31513	0.0204378	0.683802	-3.17443
chr2@bin_315_w	-0.146667	0.913333	-3.20991	0.0230048	0.697109	-3.29973
chr2@bin_1197_c	-0.146667	0.35	-2.79752	0.0371933	0.736071	-3.80653
chr3@bin_1248_c	-0.146667	0.676667	-4.07457	0.00897835	0.555212	-2.30338
chr3@bin_2870_c	-0.146667	0.378867	-2.6014	0.0467313	0.720549	-4.04095
chr5@bin_4290_w	-0.146667	0.795	-4.34013	0.00698043	0.647846	-2.02626
chr5@bin_5430_w	-0.146667	0.816667	-3.95763	0.0102004	0.701347	-2.42476
chr5@bin_2035_c	-0.146667	0.66	-3.06031	0.0271181	0.799085	-3.45603
chr6@bin_1903_c	-0.146667	0.55	-3.36244	0.0192232	0.739724	-3.12674
chr7@bin_514_c	-0.146667	0.76	-3.17317	0.0237732	0.695108	-3.36189
chr7@bin_165_c	-0.146667	0.926667	-2.89561	0.0328505	0.748055	-3.70407
chr7@bin_2711_w	-0.146667	0.61	-2.79396	0.0370911	0.780087	-3.83198
chr8@bin_2914_w	-0.146667	0.55	-8.1406	0.000394249	0.346397	0.822397
chr8@bin_1628_c	-0.146667	0.673333	-6.89955	0.000868699	0.38163	0.0825487
chr9@bin_2032_c	-0.146667	0.92	-4.52121	0.00599325	0.691504	-1.89517
chr11@bin_605_w	-0.146667	0.71	-3.17409	0.0242319	0.759358	-3.37755
chr12@bin_2298_c	-0.146667	0.326667	-5.0686	0.00364949	0.644532	-1.3532
chr12@bin_3362_c	-0.146667	0.813333	-3.27469	0.0214177	0.672392	-3.21452
chr13@bin_195_c	-0.146667	0.823333	-2.72102	0.0404672	0.784524	-3.87653
chr13@bin_2608_w	-0.146667	0.413333	-2.63991	0.0446735	0.802191	-3.9796
chr15@bin_1725_c	-0.146667	0.56	-3.47727	0.01697	0.76659	-2.96148
chr16@bin_1078_c	-0.146667	0.583333	-3.80186	0.0122727	0.656185	-2.65118
chr17@bin_1407_c	-0.146667	0.72	-3.47908	0.0169345	0.678771	-2.97244
chr17@bin_2214_c	-0.146667	0.823333	-2.80732	0.0365806	0.758326	-3.78505
chr17@bin_3557_w	-0.146667	0.3	-2.58002	0.0482166	0.815073	-4.07367
chr2@bin_1863_c	-0.145533	0.8861	-5.97935	0.0017376	0.388452	-0.599547
chr2@bin_900_c	-0.145	0.395833	-12.2583	5.52352e-05	0.108759	2.47014
chr2@bin_2005_c	-0.145	0.664167	-2.946	0.0311906	0.709666	-3.62133
chr4@bin_5000_w	-0.145	0.7525	-2.76473	0.0385342	0.777462	-3.82377
chr6@bin_3605_w	-0.145	0.910833	-5.68298	0.00214801	0.455301	-0.824879
chr7@bin_803_w	-0.145	0.880833	-15.6512	1.5492e-05	0.0825797	3.38505
chr10@bin_3517_w	-0.145	0.760833	-3.15088	0.0242174	0.695299	-3.32854
chr19@bin_697_w	-0.145	0.9075	-4.27938	0.00758132	0.569288	-2.14462
chr17@bin_879_w	-0.144457	0.130005	-3.17656	0.0237459	0.706996	-3.33
chr17@bin_3929_w	-0.144433	0.61445	-3.47615	0.016989	0.678771	-2.97584
chr1@bin_2463_w	-0.143333	0.781667	-3.71776	0.0131011	0.607323	-2.67566
chr4@bin_2447_w	-0.143333	0.701667	-4.18372	0.00815803	0.581353	-2.18855
chr4@bin_709_w	-0.143333	0.885	-3.25742	0.0216887	0.687601	-3.21961
chr8@bin_2182_w	-0.143333	0.714333	-2.91177	0.0321775	0.72493	-3.63423
chr10@bin_602_w	-0.143333	0.928333	-8.79962	0.000264936	0.239366	1.16984
chr11@bin_703_w	-0.143333	0.825	-2.97629	0.0304076	0.77705	-3.61863
chr11@bin_2173_w	-0.143333	0.755	-2.97629	0.0304076	0.77705	-3.61863
chr13@bin_3116_c	-0.143333	0.658333	-7.47714	0.000594132	0.310866	0.444411
chr13@bin_2213_w	-0.143333	0.621667	-3.57161	0.0152405	0.681835	-2.84942
chr15@bin_1570_c	-0.143333	0.695	-6.9249	0.000865562	0.393526	0.0882965
chr17@bin_2323_c	-0.143333	0.6139	-4.8776	0.00424972	0.439045	-1.51734
chr1@bin_2589_w	-0.143333	0.805	-4.3109	0.00719134	0.561387	-2.04646
chr1@bin_3730_w	-0.143333	0.361667	-2.89739	0.0328545	0.738845	-3.64241
chr4@bin_1576_c	-0.143333	0.818333	-2.64	0.0448304	0.798402	-3.98171
chr8@bin_183_w	-0.143333	0.675	-2.7553	0.0388055	0.751416	-3.83023
chr9@bin_2569_c	-0.143333	0.891667	-3.71524	0.0133146	0.750089	-2.7434
chr10@bin_1717_c	-0.143333	0.408333	-2.65771	0.0435279	0.76406	-3.94166
chr10@bin_2735_c	-0.143333	0.161667	-2.55239	0.0495628	0.773929	-4.07631
chr12@bin_2319_c	-0.143333	0.268333	-2.61478	0.0464462	0.723599	-4.02875
chr12@bin_3737_w	-0.143333	0.705	-2.58867	0.0479551	0.723599	-4.06207
chr13@bin_685_c	-0.143333	0.4	-3.94312	0.0103089	0.632536	-2.43719
chr15@bin_3751_w	-0.143333	0.643333	-9.69742	0.000171085	0.393526	1.55513
chr18@bin_1883_w	-0.143333	0.0983333	-5.83203	0.00193621	0.383204	-0.699792
chr18@bin_2313_c	-0.143333	0.311667	-4.17781	0.00824283	0.609536	-2.18979
chrX@bin_1365_w	-0.143333	0.405	-2.75919	0.0324638	0.833766	-3.40749
chrX@bin_1373_c	-0.143333	0.565	-2.51746	0.0449563	0.833766	-3.71513
chr6@bin_1344_c	-0.142833	0.440017	-3.59952	0.014831	0.739724	-2.85131
chr3@bin_1447_c	-0.142233	0.837783	-7.15971	0.000723149	0.436075	0.257923
chr1@bin_4952_w	-0.141667	0.4825	-3.32102	0.0201672	0.676402	-3.1298
chr2@bin_3819_w	-0.141667	0.651667	-4.80798	0.00457636	0.53318	-1.59467
chr2@bin_753_w	-0.141667	0.734167	-3.54863	0.0158175	0.656966	-2.90277
chr3@bin_4206_c	-0.141667	0.904167	-4.13643	0.00843905	0.555212	-2.23812
chr3@bin_151_c	-0.141667	0.8525	-3.31979	0.0200396	0.642004	-3.15159
chr5@bin_928_c	-0.141667	0.379167	-3.02662	0.0282014	0.810137	-3.49724
chr6@bin_1025_w	-0.141667	0.564167	-3.01231	0.0286595	0.752628	-3.54978
chr10@bin_3279_c	-0.141667	0.2275	-2.97179	0.0298355	0.719214	-3.54743
chr11@bin_4331_w	-0.141667	0.580833	-3.00778	0.0293161	0.767297	-3.57987
chr15@bin_1172_c	-0.141667	0.5125	-2.91004	0.0323714	0.808897	-3.64198
chr16@bin_827_w	-0.141667	0.7975	-2.97175	0.0305532	0.793564	-3.62213
chr17@bin_348_c	-0.141667	0.7825	-2.57903	0.0482754	0.815073	-4.07494
chr19@bin_1361_w	-0.141667	0.409167	-2.63919	0.0452752	0.744966	-4.04376
chr2@bin_6531_w	-0.141333	0.51	-2.85708	0.034644	0.720429	-3.7319
chr12@bin_1713_w	-0.141133	0.725	-3.11856	0.0255662	0.689126	-3.40166
chr13@bin_9_c	-0.140667	0.521	-6.00866	0.00165637	0.370516	-0.550998
chr1@bin_1880_w	-0.14	0.843333	-2.63659	0.0449793	0.771571	-3.97015
chr2@bin_1032_c	-0.14	0.733333	-4.42544	0.00651168	0.53318	-1.96424
chr3@bin_152_w	-0.14	0.561667	-4.31558	0.00707538	0.555212	-2.05275
chr3@bin_3508_c	-0.14	0.3	-4.11429	0.00862774	0.555212	-2.26141
chr3@bin_255_w	-0.14	0.553333	-3.28073	0.0209405	0.642004	-3.19805
chr4@bin_1081_c	-0.14	0.813333	-3.36764	0.0191715	0.686852	-3.08943
chr4@bin_2123_w	-0.14	0.381667	-2.63336	0.0451962	0.798899	-3.99017
chr6@bin_2294_w	-0.14	0.766667	-2.89995	0.0327111	0.774119	-3.68932
chr8@bin_2687_c	-0.14	0.256667	-4.68201	0.00502895	0.476488	-1.6841
chr8@bin_4337_c	-0.14	0.533333	-2.67844	0.0426013	0.762349	-3.92757
chr9@bin_1569_w	-0.14	0.283333	-3.09466	0.0263433	0.807292	-3.46989
chr10@bin_1254_c	-0.14	0.583333	-6.42867	0.00119263	0.488689	-0.227115
chr10@bin_887_c	-0.14	0.61	-3.46772	0.0169509	0.68566	-2.95334
chr10@bin_4339_c	-0.14	0.667767	-2.85643	0.0342167	0.74495	-3.69081
chr10@bin_2916_w	-0.14	0.703333	-2.68252	0.0422258	0.759803	-3.9101
chr12@bin_1818_w	-0.14	0.906667	-4.09927	0.0089588	0.647364	-2.29254
chr16@bin_1958_w	-0.14	0.843333	-4.30689	0.00742236	0.609002	-2.11622
chr17@bin_2230_w	-0.14	0.836667	-2.82701	0.0357282	0.758326	-3.76031
chr18@bin_265_w	-0.14	0.84	-3.03196	0.0281568	0.736972	-3.48275
chr16@bin_107_w	-0.139167	0.637917	-2.61043	0.0469948	0.831598	-4.07611
chr17@bin_2702_w	-0.138867	0.888333	-5.08406	0.0035452	0.417172	-1.32937
chr1@bin_6103_c	-0.138333	0.474167	-2.79631	0.0370633	0.757311	-3.76846
chr4@bin_2840_w	-0.138333	0.8675	-8.37755	0.000350107	0.278046	0.932656
chr6@bin_3110_w	-0.138333	0.8125	-3.50361	0.0164544	0.739724	-2.96163
chr8@bin_2275_c	-0.138333	0.464167	-7.7037	0.000514144	0.374624	0.578602
chr6@bin_2031_c	-0.138333	0.7475	-2.60335	0.0467986	0.79829	-4.06513
chr9@bin_2076_c	-0.138333	0.340833	-3.65872	0.0141327	0.751635	-2.80696
chr10@bin_274_c	-0.138333	0.104167	-3.23201	0.0220697	0.695299	-3.23095
chr11@bin_188_c	-0.138333	0.9075	-4.36529	0.00702645	0.618449	-2.05911
chr15@bin_2998_w	-0.138333	0.213333	-2.66596	0.0434006	0.843472	-3.94871
chr16@bin_1123_w	-0.138133	0.3962	-4.17997	0.00839252	0.609002	-2.24664
chr11@bin_1725_w	-0.137833	0.831117	-3.16929	0.024364	0.759358	-3.38333
chr4@bin_4532_c	-0.137133	0.523333	-2.84827	0.0348647	0.750503	-3.719
chr10@bin_2896_w	-0.1367	0.69945	-2.76411	0.0382375	0.749546	-3.80679
chr1@bin_5274_w	-0.136667	0.581667	-2.82319	0.0358887	0.752463	-3.73482
chr2@bin_581_c	-0.136667	0.458333	-4.28302	0.00746363	0.552299	-2.10791
chr2@bin_1646_c	-0.136667	0.678333	-3.48268	0.01699	0.663887	-2.9786
chr2@bin_2613_c	-0.136667	0.368333	-3.17489	0.0239379	0.697109	-3.3418
chr3@bin_2909_c	-0.136667	0.615	-3.24905	0.0217049	0.642004	-3.23591
chr3@bin_2008_w	-0.136667	0.278333	-2.75641	0.0386726	0.720549	-3.84346
chr4@bin_6366_w	-0.136667	0.581667	-4.28387	0.00739687	0.581353	-2.08575
chr4@bin_1376_w	-0.136667	0.865	-4.21274	0.00792853	0.581353	-2.15858
chr4@bin_5506_c	-0.136667	0.811667	-3.98913	0.00990968	0.61283	-2.39311
chr4@bin_6516_c	-0.136667	0.201667	-2.56575	0.0491083	0.82103	-4.07649
chr5@bin_4814_w	-0.136667	0.33	-2.98999	0.0294348	0.818606	-3.54224
chr5@bin_3661_c	-0.136667	0.375	-2.95352	0.0307223	0.818606	-3.58722
chr5@bin_2749_c	-0.136667	0.625	-2.61182	0.0463351	0.866364	-4.0169
chr6@bin_478_c	-0.136667	0.518333	-2.73849	0.0396894	0.790954	-3.89268
chr6@bin_522_c	-0.136667	0.651667	-2.68316	0.0424456	0.79829	-3.96305
chr7@bin_3615_c	-0.136667	0.588367	-3.23211	0.0222298	0.692601	-3.29067
chr8@bin_4332_c	-0.136667	0.445	-3.15382	0.0242621	0.697225	-3.33753
chr10@bin_1981_w	-0.136667	0.828333	-3.38293	0.01862	0.688772	-3.05217
chr10@bin_1059_w	-0.136667	0.595	-3.34785	0.0193642	0.688772	-3.0934
chr10@bin_340_w	-0.136667	0.521667	-3.08124	0.0262482	0.697673	-3.41309
chr11@bin_4810_c	-0.136667	0.165	-4.3127	0.00738798	0.618449	-2.11233
chr11@bin_4282_w	-0.136667	0.198333	-4.0244	0.00979585	0.650579	-2.41223
chr12@bin_1489_w	-0.136667	0.79	-4.01372	0.00975926	0.647364	-2.38286
chr12@bin_2295_w	-0.136667	0.365	-3.35882	0.0195	0.672392	-3.11527
chr12@bin_1869_w	-0.136667	0.545	-2.86303	0.0344426	0.696	-3.71567
chr14@bin_2173_c	-0.136667	0.658333	-3.00891	0.0290128	0.764042	-3.54765
chr14@bin_551_c	-0.136667	0.828333	-2.71545	0.0410921	0.793382	-3.91395
chr17@bin_3202_w	-0.136667	0.905	-9.83977	0.000159215	0.120569	1.62835
chr17@bin_275_c	-0.136667	0.33	-5.07451	0.00357463	0.417172	-1.33792
chr17@bin_967_w	-0.136667	0.786667	-3.02494	0.0282838	0.728821	-3.51455
chr17@bin_2734_w	-0.136667	0.931667	-2.94189	0.0311744	0.733019	-3.61703
chr3@bin_3516_c	-0.135833	0.32625	-2.63335	0.0449307	0.720549	-4.00004
chr15@bin_3865_c	-0.135833	0.42625	-7.50277	0.000592215	0.393526	0.449263
chr8@bin_4354_c	-0.135567	0.600017	-3.0199	0.0283326	0.723708	-3.50065
chr3@bin_852_w	-0.135	0.6375	-2.88389	0.0331848	0.692267	-3.68308
chr7@bin_1403_w	-0.135	0.775833	-6.37304	0.00126611	0.439125	-0.293159
chr9@bin_3566_c	-0.135	0.7625	-3.39866	0.0187154	0.793306	-3.10626
chr10@bin_2002_w	-0.135	0.915833	-3.89342	0.0107602	0.617764	-2.47539
chr12@bin_1511_c	-0.135	0.285833	-3.54936	0.0158334	0.672392	-2.89475
chr17@bin_3157_c	-0.135	0.870833	-14.3081	2.47206e-05	0.0519297	3.01786
chr17@bin_4038_w	-0.135	0.894167	-3.42192	0.0180316	0.680449	-3.03888
chr19@bin_2134_w	-0.135	0.7025	-3.97292	0.0102585	0.572577	-2.46636
chr4@bin_2556_c	-0.134433	0.701683	-3.84625	0.0114723	0.633835	-2.54741
chr11@bin_6278_c	-0.1344	0.8061	-3.09861	0.0264054	0.759358	-3.46886
chr1@bin_5264_c	-0.133333	0.933333	-4.47164	0.00616671	0.561387	-1.88618
chr2@bin_5860_w	-0.133333	0.9	-3.20451	0.0231459	0.697109	-3.3062
chr2@bin_5013_w	-0.133333	0.596667	-2.8145	0.0364463	0.734215	-3.78521
chr3@bin_977_w	-0.133333	0.67	-4.00106	0.00967139	0.555212	-2.38177
chr5@bin_1510_c	-0.133333	0.93	-2.7821	0.0376742	0.844457	-3.80104
chr6@bin_1237_w	-0.133333	0.83	-2.99611	0.0292077	0.758983	-3.5698
chr7@bin_1148_c	-0.133333	0.801667	-5.13824	0.00336425	0.543993	-1.29359
chr10@bin_1929_c	-0.133333	0.581667	-3.37455	0.0187948	0.688772	-3.062
chr14@bin_3397_c	-0.133333	0.903333	-5.98477	0.00173608	0.629219	-0.598938
chr15@bin_1311_w	-0.133333	0.703333	-3.05867	0.0271983	0.769115	-3.45897
chr1@bin_4813_c	-0.133333	0.583333	-2.9029	0.0326405	0.738845	-3.63557
chr3@bin_3245_w	-0.133333	0.933333	-4.19237	0.00798323	0.555212	-2.17967
chr3@bin_4392_w	-0.133333	0.49	-3.34539	0.0194729	0.642004	-3.12128
chr4@bin_6051_w	-0.133333	0.728333	-2.90752	0.0324962	0.750503	-3.64522
chr5@bin_2792_c	-0.133333	0.601667	-5.02122	0.00373632	0.608482	-1.37617
chr5@bin_2466_c	-0.133333	0.293333	-3.37413	0.0189885	0.750238	-3.08037
chr6@bin_1416_w	-0.133333	0.933333	-4.19129	0.00806209	0.683026	-2.20476
chr8@bin_2478_c	-0.133333	0.813333	-4.48074	0.00606718	0.476488	-1.87956
chr8@bin_4162_w	-0.133333	0.245	-4.01795	0.0095449	0.538893	-2.35438
chr8@bin_968_c	-0.133333	0.356667	-3.06286	0.0269492	0.709461	-3.44804
chr9@bin_571_w	-0.133333	0.61	-3.17932	0.0239159	0.807292	-3.3672
chr9@bin_742_c	-0.133333	0.281667	-2.60487	0.0470977	0.82135	-4.08305
chr11@bin_3665_w	-0.133333	0.648333	-6.11123	0.00161893	0.415099	-0.530751
chr12@bin_2080_w	-0.133333	0.183333	-3.39499	0.0187359	0.672392	-3.07296
chr13@bin_2123_c	-0.133333	0.31	-2.78475	0.0374667	0.778631	-3.79605
chr14@bin_1866_c	-0.133333	0.613333	-2.58348	0.0482549	0.840737	-4.08196
chr16@bin_343_c	-0.133333	0.376667	-3.15676	0.0246985	0.793564	-3.39634
chr17@bin_2388_w	-0.133333	0.0666667	-18.0785	7.59234e-06	0.0358284	3.69916
chr18@bin_1639_w	-0.133333	0.893333	-3.72498	0.0130718	0.680217	-2.67448
chr15@bin_1036_w	-0.132367	0.394283	-4.67828	0.00508951	0.546027	-1.69596
chr9@bin_2885_w	-0.131667	0.340833	-10.6093	0.000114856	0.471685	1.93319
chr16@bin_1152_c	-0.131667	0.435833	-3.92249	0.010846	0.618119	-2.51951
chr17@bin_1975_w	-0.131667	0.880833	-9.37518	0.000201801	0.127175	1.4266
chr1@bin_4999_c	-0.131133	0.511133	-2.73591	0.039861	0.771571	-3.8444
chr18@bin_1744_w	-0.131133	0.885533	-4.03466	0.00950469	0.616342	-2.33924
chr14@bin_3644_c	-0.1311	0.527783	-3.32306	0.0202864	0.75379	-3.16897
chr5@bin_5015_w	-0.130833	0.717083	-6.12049	0.00153325	0.527503	-0.47244
chr4@bin_353_c	-0.130033	0.897217	-5.3951	0.00273125	0.48868	-1.05337
chr1@bin_1647_c	-0.13	0.871667	-4.47001	0.00617621	0.561387	-1.88778
chr2@bin_6407_c	-0.13	0.838333	-3.86517	0.0113289	0.635549	-2.54899
chr2@bin_5443_c	-0.13	0.445	-2.95432	0.0308878	0.706517	-3.61105
chr2@bin_2348_c	-0.13	0.465	-2.88755	0.0334151	0.718672	-3.6939
chr2@bin_6429_c	-0.13	0.588333	-2.80455	0.036882	0.734215	-3.7977
chr3@bin_3757_w	-0.13	0.881667	-3.37333	0.0188747	0.642004	-3.08831
chr4@bin_5415_c	-0.13	0.726667	-3.54492	0.0157847	0.65659	-2.88419
chr4@bin_1281_w	-0.13	0.825	-3.54207	0.0158335	0.65659	-2.88745
chr4@bin_1538_w	-0.13	0.846667	-3.11541	0.0254976	0.716723	-3.39017
chr4@bin_5639_c	-0.13	0.868333	-2.91553	0.03219	0.750503	-3.63528
chr6@bin_2864_c	-0.13	0.608333	-3.59727	0.014867	0.739724	-2.85388
chr7@bin_4665_c	-0.13	0.78	-3.14555	0.0245374	0.701693	-3.39544
chr8@bin_139_c	-0.13	0.755	-6.04381	0.00161033	0.423542	-0.522499
chr8@bin_392_w	-0.13	0.68	-4.45643	0.00620855	0.476488	-1.90361
chr8@bin_202_c	-0.13	0.905	-2.93334	0.0313664	0.72493	-3.60745
chr8@bin_1242_c	-0.13	0.135	-2.89543	0.0328075	0.72517	-3.65455
chr8@bin_2719_w	-0.13	0.761667	-2.84709	0.0347523	0.740014	-3.71488
chr9@bin_3170_w	-0.13	0.4539	-3.38043	0.019095	0.793399	-3.12765
chr9@bin_894_c	-0.13	0.581667	-2.93036	0.0318824	0.813382	-3.67216
chr10@bin_4218_c	-0.13	0.138333	-3.47175	0.0168758	0.68566	-2.94867
chr10@bin_1868_c	-0.13	0.888333	-3.18454	0.0232991	0.695299	-3.28793
chr10@bin_2068_w	-0.13	0.901667	-2.98354	0.0294253	0.717263	-3.53292
chr13@bin_3725_w	-0.13	0.868333	-3.24372	0.0219104	0.732792	-3.2324
chr13@bin_1948_c	-0.13	0.821667	-3.10881	0.0255659	0.743211	-3.39494
chr14@bin_2445_w	-0.13	0.821667	-3.03334	0.0282012	0.764042	-3.51768
chr15@bin_3422_c	-0.13	0.935	-5.58929	0.00232521	0.453925	-0.890368
chr17@bin_2481_c	-0.13	0.748333	-5.32737	0.00288255	0.410446	-1.11607
chr17@bin_749_w	-0.13	0.221667	-4.41204	0.0065268	0.497696	-1.96574
chr18@bin_2706_w	-0.13	0.535	-2.92462	0.0319257	0.751563	-3.61461
chr19@bin_2106_c	-0.13	0.353333	-3.27529	0.0215396	0.684296	-3.25732
chr6@bin_2839_c	-0.128933	0.333333	-2.85403	0.0345468	0.777653	-3.74684
chr2@bin_6624_w	-0.1289	0.347783	-2.8603	0.0345118	0.720429	-3.72788
chr12@bin_40_c	-0.1289	0.87335	-3.5501	0.0158208	0.672392	-2.89391
chr2@bin_4807_c	-0.128867	0.6278	-2.98199	0.0299032	0.697109	-3.57689
chr13@bin_447_c	-0.128867	0.526667	-5.85243	0.00186881	0.37969	-0.671892
chr2@bin_3913_w	-0.128333	0.454167	-2.60855	0.0467531	0.745077	-4.04602
chr3@bin_4437_w	-0.128333	0.524167	-4.56048	0.00560167	0.555212	-1.80796
chr4@bin_6013_c	-0.128333	0.785833	-3.4205	0.0180825	0.675723	-3.02769
chr10@bin_674_w	-0.128333	0.415	-4.1478	0.00831062	0.611241	-2.20451
chr10@bin_1728_w	-0.128333	0.755833	-3.50324	0.0163025	0.68566	-2.9123
chr10@bin_4103_c	-0.128333	0.216667	-2.81271	0.0360594	0.749546	-3.7456
chr12@bin_3001_c	-0.128333	0.755833	-5.1735	0.00333586	0.644532	-1.26039
chr12@bin_3099_c	-0.128333	0.849167	-3.54926	0.0158351	0.672392	-2.89487
chr8@bin_3907_c	-0.1278	0.8539	-2.99352	0.0292211	0.723708	-3.53309
chr11@bin_3596_c	-0.1278	0.625	-3.14695	0.0249893	0.759358	-3.41028
chr4@bin_6420_c	-0.1275	0.407083	-3.11415	0.0255343	0.716723	-3.39169
chr6@bin_377_w	-0.1275	0.60125	-3.52955	0.0159963	0.739724	-2.93164
chr13@bin_2710_c	-0.1267	0.540017	-2.88198	0.0333514	0.771884	-3.67424
chr1@bin_4145_w	-0.126667	0.895567	-4.6016	0.00546035	0.561387	-1.7597
chr1@bin_3606_c	-0.126667	0.88	-3.80963	0.0118974	0.604702	-2.57427
chr1@bin_1801_w	-0.126667	0.936667	-3.78015	0.0122694	0.604702	-2.60665
chr1@bin_5241_c	-0.126667	0.378333	-2.71223	0.0410203	0.771571	-3.87428
chr2@bin_5048_w	-0.126667	0.47	-3.2744	0.0213911	0.696882	-3.22272
chr3@bin_354_c	-0.126667	0.843333	-3.48438	0.016694	0.642004	-2.95852
chr4@bin_826_c	-0.126667	0.183333	-2.66127	0.0436817	0.797689	-3.95467
chr5@bin_1272_w	-0.126667	0.786667	-4.13431	0.00853828	0.669613	-2.23763
chr6@bin_420_c	-0.126667	0.47	-4.67119	0.00510605	0.651357	-1.72326
chr6@bin_3574_c	-0.126667	0.706667	-3.21035	0.0228105	0.739724	-3.30821
chr6@bin_3473_w	-0.126667	0.928333	-2.88111	0.033451	0.774119	-3.71289
chr6@bin_790_w	-0.126667	0.616667	-2.63602	0.0449605	0.79829	-4.02328
chr7@bin_599_w	-0.126667	0.75	-3.75759	0.0125191	0.645015	-2.68028
chr7@bin_1299_c	-0.126667	0.526667	-3.08644	0.0262673	0.718309	-3.46763
chr7@bin_2904_c	-0.126667	0.7275	-2.70355	0.041374	0.785952	-3.94677
chr8@bin_3985_c	-0.126667	0.716667	-5.5384	0.00239738	0.454855	-0.922742
chr8@bin_4144_w	-0.126667	0.37	-4.39827	0.00656262	0.481227	-1.96155
chr8@bin_913_c	-0.126667	0.83	-2.79587	0.0369532	0.74986	-3.77912
chr9@bin_2448_w	-0.126667	0.896667	-3.19994	0.0233633	0.807292	-3.34235
chr11@bin_2623_c	-0.126667	0.756667	-6.63698	0.00110901	0.405364	-0.150299
chr11@bin_4520_c	-0.126667	0.88	-3.53993	0.0161856	0.734989	-2.94758
chr11@bin_920_c	-0.126667	0.716667	-3.19266	0.0237285	0.759358	-3.35522
chr13@bin_563_w	-0.126667	0.673333	-4.15194	0.00835174	0.576915	-2.21578
chr13@bin_1295_w	-0.126667	0.363333	-2.55455	0.0496223	0.802191	-4.08876
chr15@bin_83_w	-0.126667	0.832233	-3.47235	0.0170616	0.76659	-2.96716
chr17@bin_1355_c	-0.126667	0.27	-3.86159	0.0112743	0.600939	-2.54193
chr19@bin_438_w	-0.126667	0.21	-2.99515	0.0296465	0.721675	-3.59688
chrX@bin_1403_w	-0.126667	0.74	-3.49889	0.012583	0.807883	-2.51287
chr15@bin_2266_w	-0.126633	0.558883	-4.29404	0.00731217	0.643851	-2.07452
chr16@bin_335_c	-0.126633	0.47555	-4.75791	0.0048847	0.609002	-1.67397
chr4@bin_6352_w	-0.1256	0.448333	-5.61902	0.00227561	0.456422	-0.867784
chr15@bin_1611_c	-0.125567	0.907217	-4.94087	0.00401856	0.546027	-1.45089
chr17@bin_1873_w	-0.125167	0.441883	-2.95119	0.0308347	0.733019	-3.6055
chr1@bin_4907_c	-0.125	0.589167	-2.82166	0.0359544	0.752463	-3.73673
chr2@bin_3567_w	-0.125	0.870833	-15.1386	1.9259e-05	0.108759	3.18281
chr4@bin_2363_w	-0.125	0.8525	-3.03356	0.02803	0.725227	-3.48985
chr4@bin_179_w	-0.125	0.859167	-2.86004	0.0343792	0.750503	-3.70431
chr8@bin_3512_c	-0.125	0.9375	-7.20641	0.000706994	0.38163	0.279519
chr13@bin_3453_c	-0.125	0.644167	-3.44722	0.0174556	0.704213	-2.99263
chr13@bin_2483_w	-0.125	0.884167	-2.84062	0.0350374	0.771884	-3.72591
chr14@bin_422_c	-0.125	0.170833	-2.67155	0.0433362	0.810162	-3.96964
chr17@bin_314_c	-0.125	0.5775	-12.6475	4.58734e-05	0.0722736	2.5977
chr19@bin_793_w	-0.125	0.890833	-5.80319	0.00202688	0.514482	-0.763686
chr19@bin_146_w	-0.125	0.475833	-2.61018	0.046903	0.754209	-4.08081
chr16@bin_1473_c	-0.124433	0.20665	-4.11191	0.00897267	0.609002	-2.31769
chr16@bin_2737_c	-0.124433	0.33445	-3.22159	0.0229539	0.793564	-3.31843
chr11@bin_2164_w	-0.124	0.570667	-2.65492	0.0445398	0.818262	-4.0215
chr15@bin_4064_w	-0.123767	0.305617	-2.85552	0.0345357	0.814935	-3.70986
chr1@bin_4609_w	-0.123333	0.938333	-3.55926	0.0155189	0.623794	-2.85393
chr1@bin_726_w	-0.123333	0.648333	-3.44912	0.0174977	0.652389	-2.98031
chr2@bin_6339_c	-0.123333	0.938333	-5.14469	0.00340818	0.503624	-1.28834
chr3@bin_135_w	-0.123333	0.828333	-2.72305	0.0402687	0.720549	-3.88574
chr5@bin_3445_c	-0.123333	0.7261	-4.14263	0.008468	0.669613	-2.22894
chr7@bin_1943_w	-0.123333	0.771667	-3.10222	0.0257925	0.714376	-3.44831
chr8@bin_824_c	-0.123333	0.671667	-3.12408	0.0251063	0.699005	-3.37353
chr9@bin_1355_w	-0.123333	0.918333	-6.47034	0.00122265	0.604483	-0.251929
chr10@bin_4535_w	-0.123333	0.818333	-2.72323	0.0401816	0.758846	-3.85846
chr11@bin_3511_w	-0.123333	0.828333	-4.07383	0.00932521	0.642964	-2.35982
chr11@bin_5300_c	-0.123333	0.478333	-2.67462	0.0434909	0.806706	-3.99647
chr13@bin_1271_w	-0.123333	0.848333	-3.87142	0.0110984	0.633161	-2.51493
chr14@bin_1002_c	-0.123333	0.638333	-4.48127	0.00619122	0.677541	-1.9127
chr16@bin_2428_w	-0.123333	0.921667	-3.51391	0.0166339	0.729548	-2.97536
chr16@bin_2514_c	-0.123333	0.911667	-2.96401	0.0308297	0.793564	-3.63168
chr17@bin_3175_w	-0.123333	0.638333	-3.17514	0.0237845	0.706996	-3.33172
chr19@bin_378_c	-0.123333	0.828333	-2.90218	0.0330521	0.721675	-3.71207
chr2@bin_4948_c	-0.123333	0.258333	-5.53537	0.00246275	0.482552	-0.953934
chr2@bin_1108_c	-0.123333	0.26	-2.61356	0.0464676	0.745077	-4.03963
chr3@bin_3357_w	-0.123333	0.885	-3.34931	0.0193875	0.642004	-3.11664
chr4@bin_5066_w	-0.123333	0.32	-3.68955	0.0135193	0.633835	-2.72063
chr4@bin_5936_w	-0.123333	0.808333	-3.52278	0.0161683	0.660278	-2.90954
chr4@bin_4994_w	-0.123333	0.5961	-2.63005	0.0453791	0.799506	-3.99438
chr5@bin_5179_w	-0.123333	0.425	-3.9533	0.0102456	0.701347	-2.42941
chr6@bin_1843_w	-0.123333	0.371667	-3.00326	0.0289643	0.757282	-3.56096
chr8@bin_2877_w	-0.123333	0.587233	-3.88915	0.0108887	0.562768	-2.49297
chr9@bin_654_w	-0.123333	0.355	-3.47225	0.0172668	0.793306	-3.02043
chr9@bin_589_c	-0.123333	0.813333	-3.29226	0.0210591	0.807292	-3.23189
chr10@bin_3250_c	-0.123333	0.868333	-4.44988	0.00619071	0.611241	-1.897
chr10@bin_1038_c	-0.123333	0.471667	-3.00576	0.0286668	0.714405	-3.50555
chr10@bin_1531_c	-0.123333	0.888333	-2.59953	0.0467558	0.773929	-4.01592
chr11@bin_4965_c	-0.123333	0.901667	-6.46232	0.00125402	0.405364	-0.273101
chr11@bin_1688_c	-0.123333	0.558333	-4.19602	0.00826949	0.631594	-2.23204
chr12@bin_2400_w	-0.123333	0.513333	-2.77182	0.0384015	0.696	-3.82988
chr14@bin_3088_w	-0.123333	0.873333	-3.14201	0.0248847	0.763081	-3.38539
chr14@bin_855_w	-0.123333	0.708333	-2.58752	0.0480163	0.840737	-4.07679
chr15@bin_2130_w	-0.123333	0.465	-8.30326	0.000364183	0.393526	0.897036
chr15@bin_603_c	-0.123333	0.711667	-4.40648	0.00656258	0.602888	-1.96123
chr15@bin_4009_c	-0.123333	0.506333	-3.38864	0.0187091	0.76659	-3.06448
chr15@bin_4189_w	-0.123333	0.581667	-2.79138	0.0372896	0.817362	-3.79021
chr18@bin_1144_w	-0.123333	0.761667	-3.86025	0.0113527	0.663497	-2.52602
chr19@bin_1350_w	-0.123333	0.871667	-2.70764	0.041674	0.731929	-3.95667
chr7@bin_1184_w	-0.122667	0.790667	-2.56233	0.0491892	0.804783	-4.12778
chr3@bin_3721_w	-0.1222	0.421133	-4.12489	0.00853681	0.555212	-2.25025
chr2@bin_2499_w	-0.121667	0.455833	-2.63412	0.0453148	0.742897	-4.0134
chr3@bin_3498_c	-0.121667	0.600833	-3.48592	0.0166659	0.642004	-2.95674
chr7@bin_3090_w	-0.121667	0.894167	-2.80703	0.0365135	0.779781	-3.81546
chr9@bin_4116_w	-0.121667	0.650833	-3.08006	0.0267894	0.807292	-3.48771
chr10@bin_3786_c	-0.121667	0.845833	-2.77507	0.0377339	0.749546	-3.79296
chr11@bin_1948_w	-0.121667	0.695833	-8.09029	0.00043805	0.377096	0.749315
chr11@bin_6113_c	-0.121667	0.694167	-2.71957	0.0411968	0.805417	-3.93947
chr13@bin_851_w	-0.121667	0.8975	-2.84193	0.0349826	0.771884	-3.72427
chr16@bin_1162_c	-0.121667	0.3375	-2.62938	0.0459233	0.831598	-4.05192
chr18@bin_321_w	-0.121667	0.204167	-3.11181	0.025675	0.732877	-3.38574
chr18@bin_1429_w	-0.121667	0.859167	-2.99896	0.0292601	0.736972	-3.52312
chr3@bin_3940_c	-0.121133	0.882767	-3.55826	0.0154012	0.642004	-2.8733
chr6@bin_3182_c	-0.1211	0.625017	-6.19334	0.00144946	0.455301	-0.425779
chr6@bin_2008_c	-0.1211	0.177217	-5.08751	0.00352246	0.53215	-1.33525
chr14@bin_733_w	-0.1211	0.45055	-4.31036	0.00728449	0.677541	-2.08395
chr3@bin_4009_w	-0.121067	0.510567	-2.75701	0.0386445	0.720549	-3.8427
chr15@bin_3793_w	-0.120833	0.577083	-2.94423	0.0310913	0.79119	-3.59962
chr1@bin_4420_w	-0.12	0.81	-3.92995	0.0105071	0.604702	-2.44368
chr1@bin_793_c	-0.12	0.88	-3.68192	0.0136078	0.610671	-2.71559
chr1@bin_3942_w	-0.12	0.83	-3.27146	0.0213211	0.686406	-3.18836
chr1@bin_3385_c	-0.12	0.416667	-3.2173	0.0226676	0.692454	-3.25279
chr1@bin_5977_c	-0.12	0.803333	-2.59143	0.0475407	0.774566	-4.02765
chr2@bin_3031_c	-0.12	0.476667	-10.1448	0.000140584	0.173882	1.73808
chr2@bin_1337_c	-0.12	0.94	-7.18358	0.000741585	0.312838	0.240454
chr2@bin_4981_c	-0.12	0.398333	-5.94592	0.00178257	0.388452	-0.62533
chr2@bin_5605_w	-0.12	0.725	-3.8015	0.0121005	0.641948	-2.61879
chr2@bin_4630_w	-0.12	0.493333	-3.45049	0.0175978	0.663887	-3.01586
chr2@bin_2387_w	-0.12	0.19	-2.56811	0.049131	0.746907	-4.09774
chr3@bin_2681_w	-0.12	0.841667	-4.04981	0.00920524	0.555212	-2.32968
chr3@bin_3482_w	-0.12	0.803333	-3.06105	0.0269377	0.674106	-3.46373
chr3@bin_3496_c	-0.12	0.736667	-2.66489	0.0432277	0.720549	-3.95977
chr4@bin_206_c	-0.12	0.406667	-4.48922	0.00607808	0.568908	-1.88021
chr4@bin_2211_w	-0.12	0.541667	-3.09756	0.0260273	0.718773	-3.41183
chr5@bin_212_w	-0.12	0.67	-3.64181	0.014185	0.716582	-2.7725
chr6@bin_362_c	-0.12	0.225	-5.24491	0.00307843	0.53215	-1.1954
chr6@bin_3209_c	-0.12	0.438333	-3.84257	0.0114721	0.739724	-2.57862
chr6@bin_2385_w	-0.12	0.12	-3.64949	0.0140577	0.739724	-2.79443
chr6@bin_2986_w	-0.12	0.806667	-3.08452	0.026352	0.752628	-3.46104
chr6@bin_727_w	-0.12	0.911667	-2.79921	0.0368887	0.786885	-3.81583
chr7@bin_2432_c	-0.12	0.27	-3.52756	0.0160106	0.671151	-2.94191
chr7@bin_3670_w	-0.12	0.3011	-2.96772	0.0301684	0.734627	-3.61413
chr8@bin_3192_c	-0.12	0.896667	-2.71367	0.0408134	0.762349	-3.88288
chr8@bin_4_c	-0.12	0.726667	-2.59605	0.0471281	0.762349	-4.03262
chr9@bin_3599_c	-0.12	0.94	-3.06584	0.0272318	0.807292	-3.50509
chr10@bin_4158_w	-0.12	0.726667	-5.47599	0.00249284	0.567206	-0.96151
chr11@bin_3724_c	-0.12	0.893333	-3.30312	0.0209663	0.759358	-3.22346
chr11@bin_591_c	-0.12	0.27	-3.26009	0.0219967	0.759358	-3.27456
chr11@bin_5830_w	-0.12	0.0933333	-3.2392	0.0225175	0.759358	-3.29947
chr12@bin_2629_c	-0.12	0.486667	-2.97275	0.0302678	0.689126	-3.57972
chr12@bin_3948_w	-0.12	0.908333	-2.79874	0.037183	0.696	-3.79606
chr13@bin_3319_c	-0.12	0.785	-3.21321	0.0226827	0.732792	-3.26891
chr13@bin_3850_c	-0.12	0.270833	-3.04368	0.0275712	0.748424	-3.47439
chr13@bin_1096_c	-0.12	0.726667	-2.82809	0.0355669	0.772678	-3.74161
chr14@bin_1932_c	-0.12	0.828333	-2.88863	0.0334091	0.773328	-3.69645
chr15@bin_1845_w	-0.12	0.71	-3.36963	0.0191077	0.76659	-3.08674
chr15@bin_3662_c	-0.12	0.876667	-3.18963	0.023397	0.76659	-3.30039
chr15@bin_3084_c	-0.12	0.848333	-3.14661	0.0245758	0.76659	-3.35219
chr15@bin_3628_w	-0.12	0.92	-2.65202	0.0441453	0.843472	-3.96644
chr16@bin_2748_w	-0.12	0.673333	-3.69162	0.0137669	0.70783	-2.77366
chr16@bin_2359_c	-0.12	0.92	-2.89123	0.0335727	0.801993	-3.7219
chr17@bin_861_c	-0.12	0.486667	-4.76419	0.00470542	0.44259	-1.62338
chr17@bin_3193_w	-0.12	0.64	-3.27287	0.0212895	0.706996	-3.21459
chr17@bin_284_c	-0.12	0.385	-3.0849	0.0263824	0.726034	-3.44116
chr18@bin_90_c	-0.12	0.773333	-5.61689	0.00229489	0.394723	-0.870714
chr18@bin_2328_w	-0.12	0.4	-2.83355	0.0355654	0.777859	-3.72771
chr19@bin_682_c	-0.12	0.83	-7.9109	0.000481099	0.514482	0.659998
chr13@bin_4014_w	-0.119333	0.818333	-3.71564	0.0130638	0.633161	-2.68682
chr2@bin_1003_c	-0.119333	0.436333	-2.86229	0.0344304	0.720429	-3.72539
chr11@bin_3474_c	-0.119167	0.625417	-5.29109	0.00308553	0.55897	-1.19386
chr18@bin_1105_w	-0.119167	0.709583	-2.80203	0.0369304	0.78388	-3.7671
chr5@bin_357_w	-0.118933	0.262767	-2.57228	0.0486439	0.866364	-4.06743
chr1@bin_6066_c	-0.118867	0.861667	-2.65994	0.0437141	0.771571	-3.94048
chr19@bin_1641_w	-0.118867	0.7139	-3.07142	0.0271437	0.721675	-3.50328
chr10@bin_359_w	-0.118333	0.916667	-5.27174	0.00295689	0.567206	-1.13499
chr14@bin_1175_w	-0.118333	0.724167	-3.43749	0.0178768	0.75379	-3.03487
chr1@bin_4059_c	-0.118333	0.680833	-3.40577	0.0183537	0.652389	-3.0306
chr4@bin_2048_w	-0.118333	0.845833	-3.7211	0.0130757	0.633835	-2.68541
chr11@bin_3087_w	-0.118333	0.479167	-2.958	0.031062	0.77705	-3.6412
chr13@bin_3770_w	-0.118333	0.3475	-2.96459	0.0302459	0.765968	-3.57169
chr17@bin_2168_c	-0.118333	0.504167	-3.27251	0.0212982	0.706996	-3.21502
chr19@bin_1934_c	-0.118333	0.554167	-3.32274	0.0204302	0.665272	-3.20099
chr12@bin_3568_w	-0.118	0.438333	-2.95463	0.0309169	0.689126	-3.60207
chr2@bin_4708_c	-0.1178	0.4389	-2.93976	0.0314202	0.711518	-3.62906
chrX@bin_54_c	-0.117767	0.240017	-3.74174	0.00938382	0.807883	-2.23889
chr18@bin_1669_w	-0.1175	0.682917	-5.77411	0.00202588	0.383204	-0.745194
chr10@bin_1898_w	-0.117333	0.573333	-4.12541	0.00849842	0.611241	-2.2279
chr19@bin_2600_w	-0.117133	0.875233	-5.61119	0.00235752	0.514482	-0.919154
chr17@bin_268_c	-0.1167	0.312783	-3.29561	0.0207522	0.704574	-3.18756
chr1@bin_430_w	-0.116667	0.915	-7.82085	0.000485335	0.329403	0.629816
chr1@bin_2947_w	-0.116667	0.640833	-3.09973	0.0259319	0.724768	-3.39423
chr1@bin_126_c	-0.116667	0.783333	-2.90198	0.0326762	0.738845	-3.63672
chr1@bin_3395_c	-0.116667	0.868333	-2.6571	0.043866	0.771571	-3.94409
chr2@bin_987_w	-0.116667	0.691667	-5.10378	0.00352978	0.503624	-1.32464
chr2@bin_2206_c	-0.116667	0.941667	-3.91564	0.0107572	0.618715	-2.49416
chr2@bin_5879_w	-0.116667	0.631667	-3.1667	0.0241622	0.697109	-3.35167
chr2@bin_124_c	-0.116667	0.298333	-2.87713	0.0338297	0.71937	-3.70688
chr2@bin_522_w	-0.116667	0.825	-2.76263	0.0387829	0.737521	-3.85046
chr3@bin_2608_c	-0.116667	0.835	-6.49634	0.00114377	0.436075	-0.187918
chr3@bin_2330_w	-0.116667	0.271667	-4.67062	0.00505669	0.555212	-1.70106
chr3@bin_2526_c	-0.116667	0.845	-3.23042	0.0221689	0.642004	-3.25824
chr3@bin_4444_c	-0.116667	0.893333	-2.95948	0.0303414	0.689593	-3.58897
chr4@bin_3042_w	-0.116667	0.713333	-3.97409	0.0100621	0.61283	-2.40919
chr4@bin_2600_w	-0.116667	0.798333	-3.48337	0.0168773	0.671424	-2.95486
chr4@bin_3358_w	-0.116667	0.913333	-3.1839	0.0235742	0.712883	-3.30752
chr5@bin_5435_w	-0.116667	0.941667	-5.6952	0.00213044	0.56986	-0.802338
chr5@bin_2699_c	-0.116667	0.773333	-3.65918	0.0139244	0.716582	-2.75292
chr6@bin_2911_w	-0.116667	0.63	-2.74579	0.0393407	0.788811	-3.88342
chr7@bin_173_c	-0.116667	0.148333	-4.41185	0.00649785	0.573514	-1.9846
chr7@bin_4947_w	-0.116667	0.931667	-2.98387	0.0296016	0.734627	-3.59409
chr8@bin_3354_w	-0.116667	0.446667	-4.17217	0.008179	0.521978	-2.19216
chr8@bin_2216_w	-0.116667	0.631667	-3.14361	0.0245485	0.699005	-3.34988
chr8@bin_2403_w	-0.116667	0.831667	-2.81812	0.0359786	0.746671	-3.75117
chr8@bin_3866_w	-0.116667	0.201667	-2.71738	0.0406298	0.762349	-3.87818
chr8@bin_2117_w	-0.116667	0.768333	-2.56038	0.049248	0.767548	-4.07828
chr9@bin_2676_w	-0.116667	0.941667	-3.70551	0.0134515	0.750089	-2.7543
chr10@bin_4192_w	-0.116667	0.7761	-8.59585	0.000297062	0.239366	1.06947
chr10@bin_2785_w	-0.116667	0.487667	-3.50481	0.0162745	0.68566	-2.91049
chr11@bin_59_w	-0.116667	0.581667	-7.64744	0.000571983	0.377096	0.496597
chr11@bin_4086_c	-0.116667	0.731667	-5.90358	0.00189345	0.427268	-0.690256
chr12@bin_3088_w	-0.116667	0.138333	-3.70044	0.0134776	0.672392	-2.7242
chr12@bin_1344_c	-0.116667	0.621667	-3.5627	0.0156076	0.672392	-2.87954
chr12@bin_1222_c	-0.116667	0.755	-2.93764	0.0315392	0.690505	-3.62305
chr13@bin_3122_c	-0.116667	0.941667	-5.23345	0.0030931	0.398618	-1.18344
chr15@bin_258_c	-0.116667	0.781667	-3.08223	0.0264664	0.76659	-3.43026
chr16@bin_2557_w	-0.116667	0.321667	-3.39726	0.0188843	0.765578	-3.11061
chr17@bin_3310_c	-0.116667	0.828333	-3.0297	0.0281273	0.728821	-3.5087
chr18@bin_2924_w	-0.116667	0.671667	-3.85354	0.0114316	0.663497	-2.53332
chr18@bin_1671_w	-0.116667	0.273333	-2.77337	0.0382221	0.784894	-3.80304
chr18@bin_1314_c	-0.116667	0.128333	-2.70932	0.0412916	0.804586	-3.88367
chr19@bin_1055_w	-0.116667	0.738333	-3.56396	0.0157008	0.660403	-2.92025
chrX@bin_499_w	-0.116667	0.941667	-6.29743	0.000711473	0.78893	0.0110976
chrX@bin_1963_w	-0.116667	0.508333	-2.90222	0.0268657	0.833766	-3.22834
chrX@bin_1014_w	-0.116667	0.778333	-2.57713	0.0414595	0.833766	-3.63873
chr19@bin_355_c	-0.116633	0.828317	-2.69132	0.0425028	0.731929	-3.97738
chr8@bin_2480_c	-0.116633	0.826117	-3.89447	0.010829	0.562768	-2.48718
chr10@bin_3630_w	-0.116133	0.859733	-2.98214	0.0294739	0.717263	-3.53465
chr12@bin_3023_w	-0.1161	0.75305	-2.78037	0.0380099	0.696	-3.81913
chr7@bin_2442_c	-0.115833	0.782083	-3.87472	0.0110801	0.609176	-2.55046
chr5@bin_2340_w	-0.115833	0.344583	-5.60065	0.00229796	0.56986	-0.878941
chr1@bin_4896_c	-0.115567	0.59225	-5.14936	0.00335062	0.561387	-1.25616
chr1@bin_2076_w	-0.115333	0.706333	-2.67771	0.0427773	0.771571	-3.91795
chr2@bin_5034_c	-0.115	0.6275	-3.17007	0.0240697	0.697109	-3.34761
chr3@bin_1713_w	-0.115	0.480833	-5.41094	0.00264602	0.449405	-1.03134
chr3@bin_2051_w	-0.115	0.9125	-4.12612	0.00852633	0.555212	-2.24895
chr4@bin_6391_w	-0.115	0.1225	-3.45705	0.0173705	0.671424	-2.98527
chr4@bin_1020_w	-0.115	0.565833	-3.19031	0.0234028	0.712305	-3.29983
chr4@bin_654_w	-0.115	0.2675	-2.8746	0.0337891	0.750503	-3.68615
chr7@bin_1086_c	-0.115	0.305833	-3.19246	0.0232552	0.695108	-3.33852
chr8@bin_2166_c	-0.115	0.8925	-3.24982	0.0217472	0.682414	-3.22227
chr8@bin_1434_c	-0.115	0.8975	-2.88517	0.0332097	0.731759	-3.66732
chr9@bin_2140_w	-0.115	0.2225	-2.89515	0.0332313	0.813382	-3.71599
chr9@bin_4056_w	-0.115	0.4775	-2.64401	0.0449024	0.813382	-4.03302
chr11@bin_3380_w	-0.115	0.455833	-3.29973	0.0210455	0.759358	-3.22748
chr13@bin_965_w	-0.115	0.9425	-6.85851	0.000894895	0.326328	0.0541692
chr18@bin_1038_w	-0.115	0.7975	-3.47253	0.0171362	0.715458	-2.95983
chr17@bin_1571_w	-0.114467	0.658333	-3.05046	0.0274565	0.728821	-3.48325
chr1@bin_841_w	-0.114433	0.792783	-4.17484	0.00821417	0.561387	-2.18551
chr7@bin_4339_w	-0.114433	0.636117	-2.91601	0.0320658	0.747452	-3.67855
chrX@bin_171_c	-0.114433	0.432783	-3.42386	0.013802	0.807883	-2.59964
chr16@bin_2902_c	-0.114167	0.50375	-4.03974	0.00963877	0.615155	-2.39387
chr4@bin_166_c	-0.113367	0.832217	-4.50537	0.00598643	0.565718	-1.86434
chr13@bin_3163_w	-0.113367	0.91665	-2.79509	0.0370036	0.778631	-3.78305
chr2@bin_851_w	-0.113333	0.643333	-2.94477	0.0312358	0.709666	-3.62286
chr3@bin_2313_c	-0.113333	0.913333	-5.77633	0.00196828	0.436075	-0.730212
chr4@bin_2554_w	-0.113333	0.923333	-3.69692	0.0134142	0.633835	-2.71239
chr5@bin_3588_w	-0.113333	0.83	-3.96364	0.0101381	0.701347	-2.41831
chr6@bin_652_c	-0.113333	0.873333	-3.05618	0.0272319	0.752628	-3.49577
chr7@bin_1484_c	-0.113333	0.835	-4.68655	0.00502475	0.543993	-1.71353
chr7@bin_1067_w	-0.113333	0.4062	-2.9527	0.0307063	0.73732	-3.63281
chr8@bin_535_c	-0.113333	0.85	-2.84529	0.034827	0.740014	-3.71713
chr11@bin_1039_w	-0.113333	0.69	-2.87263	0.0343327	0.77705	-3.74717
chr12@bin_2754_c	-0.113333	0.79	-4.16184	0.00842095	0.647364	-2.22726
chr13@bin_3899_w	-0.113333	0.91	-4.59184	0.0054717	0.488013	-1.77327
chr17@bin_172_w	-0.113333	0.88	-3.45511	0.0173851	0.678771	-3.00024
chr18@bin_2795_w	-0.113333	0.876667	-3.61716	0.0146562	0.691227	-2.79503
chrX@bin_2403_w	-0.113333	0.766667	-5.23105	0.00188115	0.78893	-0.794453
chr1@bin_3346_w	-0.113333	0.366667	-2.81906	0.0360664	0.753004	-3.73998
chr2@bin_6410_w	-0.113333	0.561667	-6.1471	0.0015311	0.387622	-0.472328
chr2@bin_6155_c	-0.113333	0.92	-4.49547	0.00609547	0.53318	-1.89482
chr2@bin_5689_w	-0.113333	0.433333	-3.40249	0.0185506	0.672262	-3.07176
chr2@bin_2314_c	-0.113333	0.146667	-2.88181	0.0336428	0.71937	-3.70105
chr3@bin_2638_c	-0.113333	0.133333	-8.33861	0.000347626	0.436075	0.942107
chr4@bin_1209_c	-0.113333	0.896667	-3.98253	0.00997627	0.61283	-2.40016
chr4@bin_515_c	-0.113333	0.893333	-3.62254	0.0145195	0.64569	-2.79597
chr4@bin_5849_w	-0.113333	0.6	-3.15991	0.0242287	0.713906	-3.33639
chr4@bin_5073_c	-0.113333	0.31	-3.14407	0.0246721	0.716723	-3.3555
chr4@bin_4591_w	-0.113333	0.6	-2.64771	0.0444103	0.797689	-3.9719
chr5@bin_5390_c	-0.113333	0.626667	-3.55464	0.015579	0.726113	-2.87145
chr5@bin_3017_c	-0.113333	0.902233	-3.068	0.0268773	0.799085	-3.44664
chr6@bin_1426_c	-0.113333	0.616667	-3.76059	0.0124972	0.739724	-2.66949
chr6@bin_3849_c	-0.113333	0.63	-3.50323	0.0164612	0.739724	-2.96206
chr7@bin_2487_c	-0.113333	0.733333	-6.43197	0.00121308	0.439125	-0.250288
chr7@bin_3529_c	-0.113333	0.676667	-4.64387	0.00522604	0.546733	-1.75485
chr7@bin_3692_w	-0.113333	0.67	-3.34409	0.0195977	0.680092	-3.15684
chr7@bin_2832_w	-0.113333	0.463333	-2.68028	0.042562	0.785952	-3.97646
chr9@bin_1693_w	-0.113333	0.833333	-2.83949	0.0354949	0.813382	-3.7856
chr11@bin_1565_c	-0.113333	0.751667	-4.57342	0.00578297	0.618449	-1.85291
chr11@bin_2899_w	-0.113333	0.116667	-3.54557	0.0160879	0.734989	-2.94113
chr11@bin_1291_w	-0.113333	0.905	-3.22582	0.0228585	0.759358	-3.31546
chr12@bin_2509_w	-0.113333	0.186667	-4.04483	0.00945898	0.647364	-2.34987
chr12@bin_2079_c	-0.113333	0.42	-2.97971	0.0300226	0.689126	-3.57115
chr12@bin_3603_w	-0.113333	0.748333	-2.94882	0.031128	0.689126	-3.60923
chr13@bin_1148_c	-0.113333	0.843333	-6.97672	0.000825593	0.326328	0.131807
chr13@bin_1175_w	-0.113333	0.476667	-6.13218	0.00150825	0.356132	-0.457633
chr13@bin_2721_c	-0.113333	0.47	-3.72354	0.0129552	0.633161	-2.67802
chr13@bin_3330_w	-0.113333	0.793333	-2.8706	0.0338061	0.771884	-3.68843
chr14@bin_1673_c	-0.113333	0.333333	-9.91014	0.000158501	0.137711	1.64065
chr15@bin_2596_c	-0.113333	0.42	-3.68111	0.0136231	0.76659	-2.72954
chr16@bin_1064_c	-0.113333	0.84	-2.92278	0.0323517	0.800337	-3.6827
chr17@bin_3538_w	-0.113333	0.91	-3.10105	0.0258951	0.723237	-3.42149
chr18@bin_2585_c	-0.113333	0.891667	-3.57011	0.0154153	0.691227	-2.84826
chr18@bin_568_c	-0.113333	0.556667	-3.0028	0.0291291	0.736972	-3.51841
chr19@bin_333_c	-0.113333	0.5639	-5.13394	0.00349358	0.514482	-1.32764
chr19@bin_946_w	-0.113333	0.326667	-2.64771	0.0448088	0.740242	-4.0329
chr17@bin_1531_w	-0.113323	0.137772	-3.42961	0.0178794	0.678771	-3.02991
chr2@bin_5838_w	-0.112667	0.614333	-5.1551	0.00337802	0.503624	-1.27915
chr4@bin_4700_c	-0.1125	0.84375	-3.20768	0.022945	0.706267	-3.279
chr17@bin_2876_w	-0.1125	0.72625	-4.61442	0.00539694	0.459804	-1.76655
chr19@bin_2440_w	-0.1125	0.487917	-3.51742	0.0165073	0.662613	-2.97367
chrX@bin_2226_w	-0.112267	0.561667	-2.56157	0.0423429	0.833766	-3.65863
chr9@bin_126_w	-0.112233	0.897217	-4.27507	0.00757141	0.691504	-2.14276
chr10@bin_4429_w	-0.112233	0.762783	-2.59701	0.0469011	0.773929	-4.01913
chr2@bin_1043_c	-0.112233	0.613883	-3.47291	0.0171719	0.663887	-2.98989
chr17@bin_4207_c	-0.112233	0.702783	-2.94954	0.0308946	0.733019	-3.60754
chr1@bin_3842_c	-0.1122	0.482767	-2.85902	0.0343864	0.750783	-3.69011
chr2@bin_1351_c	-0.111667	0.194167	-2.76482	0.038681	0.737521	-3.84769
chr3@bin_4307_c	-0.111667	0.3825	-5.07578	0.00351795	0.490833	-1.32427
chr7@bin_3895_w	-0.111667	0.934167	-3.36527	0.0191406	0.680092	-3.13176
chr9@bin_1341_c	-0.111667	0.930833	-4.22988	0.00791076	0.691504	-2.1893
chr10@bin_4507_c	-0.111667	0.654167	-8.59958	0.000296435	0.239366	1.07133
chr12@bin_3229_c	-0.111667	0.224167	-4.90919	0.00419433	0.644532	-1.49742
chr12@bin_2873_w	-0.111667	0.870833	-3.09606	0.0262352	0.689126	-3.42893
chr14@bin_1105_w	-0.111667	0.834167	-2.76954	0.0385009	0.774924	-3.84563
chr15@bin_1538_w	-0.111667	0.3025	-3.75798	0.0125612	0.749968	-2.64389
chrX@bin_134_w	-0.111667	0.153333	-3.51409	0.0123507	0.807883	-2.49541
chr2@bin_5560_c	-0.1111	0.64555	-2.74439	0.0396434	0.740508	-3.87347
chr6@bin_1283_c	-0.1111	0.909983	-2.58754	0.0477175	0.79829	-4.08543
chr8@bin_2304_w	-0.111097	0.118885	-3.63342	0.0142499	0.622127	-2.77648
chr17@bin_3527_c	-0.110833	0.634583	-3.74524	0.0127288	0.607837	-2.67027
chr13@bin_3151_c	-0.110833	0.572917	-2.84141	0.0350043	0.771884	-3.72492
chr7@bin_3861_w	-0.110667	0.797333	-2.89085	0.0330369	0.748055	-3.71004
chr1@bin_355_w	-0.11	0.828333	-3.90409	0.0107895	0.604702	-2.47154
chr1@bin_5842_w	-0.11	0.455	-2.94006	0.0312388	0.735738	-3.58959
chr1@bin_1717_c	-0.11	0.635	-2.86151	0.0342848	0.750783	-3.68701
chr1@bin_5002_w	-0.11	0.646667	-2.69147	0.0420672	0.771571	-3.90052
chr2@bin_2491_w	-0.11	0.365	-6.91616	0.000886337	0.312838	0.0679166
chr2@bin_5806_w	-0.11	0.831667	-3.84563	0.0115595	0.636204	-2.57034
chr3@bin_3070_c	-0.11	0.945	-12.8949	4.01496e-05	0.197538	2.69216
chr3@bin_3124_w	-0.11	0.898333	-4.05493	0.00915776	0.555212	-2.32423
chr3@bin_226_w	-0.11	0.921667	-4.05493	0.00915776	0.555212	-2.32423
chr3@bin_3374_c	-0.11	0.1639	-3.79206	0.0120013	0.634891	-2.60964
chr3@bin_2588_w	-0.11	0.570567	-2.91478	0.0319888	0.692267	-3.64453
chr3@bin_1607_w	-0.11	0.401667	-2.82985	0.0353989	0.709516	-3.75083
chr3@bin_2048_w	-0.11	0.218333	-2.67432	0.042732	0.720549	-3.94774
chr4@bin_4160_w	-0.11	0.535	-5.42401	0.0026668	0.48868	-1.02901
chr4@bin_360_c	-0.11	0.465	-3.64318	0.0142027	0.64569	-2.77268
chr4@bin_5111_c	-0.11	0.859467	-2.85398	0.0346281	0.750503	-3.71187
chr4@bin_3249_c	-0.11	0.898333	-2.77413	0.0381008	0.777462	-3.81194
chr4@bin_1588_w	-0.11	0.356667	-2.71314	0.0410121	0.792438	-3.88889
chr5@bin_406_w	-0.11	0.0966667	-3.50265	0.0164842	0.741501	-2.93107
chr5@bin_5220_c	-0.11	0.731667	-3.13289	0.0249382	0.799085	-3.3678
chr5@bin_3942_c	-0.11	0.415	-2.61954	0.0458979	0.866364	-4.00704
chr6@bin_2588_c	-0.11	0.806667	-3.14711	0.0245189	0.752628	-3.38472
chr6@bin_1_c	-0.11	0.836667	-2.94325	0.0310788	0.770998	-3.63534
chr6@bin_2276_c	-0.11	0.301667	-2.59355	0.0473662	0.79829	-4.07772
chr7@bin_3801_w	-0.11	0.938333	-4.13428	0.00851626	0.585499	-2.271
chr7@bin_3716_w	-0.11	0.212767	-3.11523	0.0254081	0.708995	-3.4324
chr7@bin_989_w	-0.11	0.795	-2.97779	0.0298137	0.734627	-3.60163
chr7@bin_2446_w	-0.11	0.751667	-2.80545	0.0365828	0.779781	-3.81746
chr7@bin_368_c	-0.11	0.885	-2.57058	0.0486906	0.804783	-4.11715
chr10@bin_4100_c	-0.11	0.945	-12.6007	4.45097e-05	0.107595	2.57549
chr10@bin_3358_c	-0.11	0.601667	-3.68138	0.0134463	0.648504	-2.70963
chr10@bin_2982_w	-0.11	0.145	-3.12801	0.0248643	0.695299	-3.35623
chr10@bin_2382_w	-0.11	0.778333	-2.61489	0.0458786	0.773929	-3.99627
chr11@bin_186_c	-0.11	0.788333	-6.02296	0.00172949	0.416375	-0.597891
chr11@bin_143_c	-0.11	0.921667	-3.78096	0.0125507	0.676608	-2.67631
chr11@bin_4360_w	-0.11	0.916667	-3.33228	0.020299	0.752507	-3.18901
chr11@bin_4620_w	-0.11	0.863333	-2.82416	0.0363587	0.77705	-3.80776
chr11@bin_2528_c	-0.11	0.611667	-2.63657	0.0455421	0.821532	-4.04487
chr12@bin_1855_c	-0.11	0.688333	-2.91854	0.0322558	0.692778	-3.6467
chr12@bin_1291_w	-0.11	0.931667	-2.86632	0.0343086	0.696	-3.71158
chr12@bin_1964_w	-0.11	0.895	-2.7397	0.0399133	0.696	-3.87034
chr12@bin_3700_c	-0.11	0.601667	-2.60275	0.0471346	0.723599	-4.04409
chr13@bin_1740_w	-0.11	0.141667	-5.31769	0.00288077	0.398618	-1.11063
chr13@bin_623_c	-0.11	0.89	-2.77087	0.0380989	0.778631	-3.81355
chr15@bin_2555_w	-0.11	0.401667	-3.03743	0.027878	0.769115	-3.48494
chr15@bin_2788_w	-0.11	0.895	-2.64027	0.0447833	0.843472	-3.98138
chr16@bin_2088_w	-0.11	0.861667	-5.69472	0.00222339	0.572479	-0.854462
chr16@bin_706_w	-0.11	0.818333	-3.12294	0.0256676	0.793564	-3.43724
chr17@bin_3064_c	-0.11	0.868333	-5.68256	0.00215728	0.410446	-0.819922
chr17@bin_284_w	-0.11	0.191667	-5.02813	0.00372167	0.418212	-1.37965
chr17@bin_3882_w	-0.11	0.5039	-2.84868	0.0348159	0.751404	-3.73316
chr18@bin_196_c	-0.11	0.881667	-4.26626	0.00755974	0.59008	-2.09919
chr19@bin_1948_c	-0.11	0.148333	-10.4936	0.000122969	0.507863	1.87929
chr19@bin_300_w	-0.11	0.165	-6.06954	0.00165399	0.514482	-0.555992
chr19@bin_1368_w	-0.11	0.705	-4.17059	0.00842721	0.572577	-2.25704
chr19@bin_2538_c	-0.11	0.691667	-4.13821	0.00869963	0.572577	-2.29088
chrX@bin_1230_w	-0.11	0.925	-4.78754	0.00293745	0.78893	-1.183
chrX@bin_2107_c	-0.11	0.918333	-3.98493	0.00705905	0.78893	-1.97533
chrX@bin_199_c	-0.11	0.195	-3.42311	0.0138147	0.807883	-2.60051
chrX@bin_1064_w	-0.11	0.411667	-2.8534	0.0286498	0.833766	-3.2892
chrX@bin_1729_c	-0.11	0.748333	-2.56631	0.0420716	0.833766	-3.65256
chr17@bin_3593_w	-0.109333	0.824667	-2.75559	0.038928	0.778926	-3.85024
chr2@bin_1177_w	-0.108933	0.483333	-4.85067	0.00440504	0.53318	-1.55488
chr9@bin_3253_c	-0.108933	0.796667	-5.18665	0.00331706	0.687846	-1.2738
chr9@bin_3452_w	-0.1089	0.682217	-5.95182	0.00179277	0.604483	-0.638936
chr13@bin_3043_w	-0.1089	0.889983	-3.06002	0.027052	0.745659	-3.45439
chr12@bin_1226_w	-0.108867	0.6078	-2.805	0.0369057	0.696	-3.78821
chr13@bin_3909_w	-0.108857	0.160005	-4.91509	0.00407825	0.44753	-1.46814
chr15@bin_2954_c	-0.108667	0.777667	-6.26011	0.00138588	0.393526	-0.371588
chr1@bin_2807_w	-0.108333	0.945833	-9.52088	0.000187054	0.272725	1.46684
chr1@bin_4656_c	-0.108333	0.7225	-4.1837	0.00814267	0.561387	-2.17636
chr3@bin_2364_w	-0.108333	0.835833	-5.3035	0.00289479	0.456138	-1.12345
chr11@bin_785_c	-0.108333	0.665833	-3.80329	0.012264	0.674093	-2.65167
chr3@bin_4422_c	-0.108333	0.844167	-2.65072	0.0439838	0.720549	-3.97785
chr5@bin_2948_w	-0.108333	0.9175	-3.67395	0.0137073	0.71448	-2.73634
chr5@bin_1777_c	-0.108333	0.375833	-2.58989	0.0476005	0.866364	-4.04491
chr6@bin_1495_w	-0.108333	0.770833	-2.86776	0.0339863	0.775802	-3.72961
chr15@bin_3157_c	-0.108333	0.5925	-5.23394	0.00311897	0.538549	-1.18992
chr18@bin_134_c	-0.108333	0.514167	-3.65708	0.0140453	0.691227	-2.75016
chr19@bin_83_c	-0.108333	0.270833	-4.026	0.00972529	0.572577	-2.40951
chr13@bin_4001_w	-0.108067	0.495233	-4.56281	0.00562188	0.488013	-1.80149
chrX@bin_2516_c	-0.108	0.244	-2.88872	0.0273468	0.833766	-3.24514
chr5@bin_4819_c	-0.1078	0.5461	-3.8646	0.0112231	0.704926	-2.52543
chr9@bin_4139_w	-0.1078	0.645	-2.76046	0.0390079	0.813382	-3.88511
chr11@bin_845_c	-0.1078	0.762233	-6.47232	0.00124513	0.405364	-0.265975
chr3@bin_371_w	-0.107767	0.54945	-4.3406	0.00690593	0.555212	-2.0273
chr5@bin_4164_w	-0.107767	0.21165	-3.33626	0.0198066	0.750238	-3.12489
chr10@bin_3226_w	-0.107767	0.788317	-4.05861	0.00908842	0.611241	-2.29822
chr3@bin_4255_w	-0.1075	0.76875	-2.72742	0.0400558	0.720549	-3.8802
chr2@bin_2991_c	-0.107333	0.365	-3.20756	0.023066	0.697109	-3.30254
chr2@bin_5930_c	-0.107167	0.528817	-3.42837	0.0180298	0.665098	-3.04157
chr1@bin_2533_w	-0.106667	0.913333	-4.3423	0.00697664	0.561387	-2.01482
chr1@bin_5641_c	-0.106667	0.61	-3.10351	0.0258191	0.723927	-3.38964
chr1@bin_5108_w	-0.106667	0.69	-2.85982	0.0343536	0.750783	-3.68911
chr2@bin_6395_w	-0.106667	0.871667	-4.39981	0.00667213	0.53318	-1.98985
chr2@bin_2568_c	-0.106667	0.26	-3.92136	0.0106945	0.618715	-2.48797
chr2@bin_4451_w	-0.106667	0.226667	-3.18368	0.0236996	0.697109	-3.33122
chr2@bin_2133_c	-0.106667	0.782233	-2.81418	0.03646	0.734215	-3.78561
chr2@bin_2305_c	-0.106667	0.17	-2.63926	0.0450313	0.742897	-4.00685
chr3@bin_2113_w	-0.106667	0.569167	-4.20548	0.00788048	0.555212	-2.16604
chr3@bin_3468_c	-0.106667	0.538333	-3.75999	0.0124129	0.639335	-2.64527
chr4@bin_1634_w	-0.106667	0.81	-4.14401	0.00848454	0.581353	-2.22977
chr4@bin_4155_c	-0.106667	0.426667	-3.74826	0.0127071	0.633835	-2.65524
chr4@bin_726_w	-0.106667	0.876667	-3.26126	0.0215952	0.686852	-3.21505
chr4@bin_1303_c	-0.106667	0.673333	-3.07332	0.0267663	0.718773	-3.44131
chr4@bin_5591_w	-0.106667	0.723333	-2.95421	0.0307556	0.737155	-3.58741
chr5@bin_1382_c	-0.106667	0.946667	-6.265	0.00137675	0.527503	-0.365597
chr6@bin_3919_w	-0.106667	0.486667	-3.44243	0.017595	0.739724	-3.03279
chr7@bin_1449_w	-0.106667	0.903333	-4.19207	0.00804251	0.585499	-2.21032
chr7@bin_594_w	-0.106667	0.893333	-3.892	0.0108843	0.606779	-2.5315
chr7@bin_1992_c	-0.106667	0.94	-3.04596	0.0275303	0.727028	-3.51736
chr7@bin_4731_w	-0.106667	0.788333	-2.78169	0.0376427	0.780087	-3.8475
chr8@bin_58_c	-0.106667	0.728333	-4.44893	0.00625299	0.476488	-1.91106
chr8@bin_3587_c	-0.106667	0.801133	-4.24432	0.00761799	0.521978	-2.11764
chr8@bin_3562_w	-0.106667	0.53	-4.23213	0.00770958	0.521978	-2.13017
chr8@bin_617_w	-0.106667	0.366667	-3.48418	0.0167509	0.633233	-2.94704
chr8@bin_676_c	-0.106667	0.476667	-3.42555	0.0178668	0.633233	-3.01506
chr9@bin_2454_c	-0.106667	0.856667	-3.04543	0.0278814	0.807292	-3.5301
chr9@bin_895_c	-0.106667	0.508333	-2.63487	0.045405	0.815896	-4.04469
chr10@bin_4523_c	-0.106667	0.753333	-3.23006	0.0221188	0.695299	-3.23328
chr10@bin_134_w	-0.106667	0.923333	-2.77516	0.0377299	0.749546	-3.79285
chr10@bin_2706_c	-0.106667	0.583333	-2.68307	0.0421978	0.759803	-3.90941
chr11@bin_2114_c	-0.106667	0.14	-3.55751	0.0158832	0.734989	-2.92747
chr12@bin_1987_c	-0.106667	0.725	-4.29247	0.00741362	0.647364	-2.09311
chr12@bin_1949_c	-0.106667	0.351667	-3.87184	0.0112746	0.647364	-2.53538
chr12@bin_2103_c	-0.106667	0.253333	-3.14448	0.0248189	0.686479	-3.37033
chr12@bin_3229_w	-0.106667	0.345	-2.92579	0.0319817	0.692055	-3.63771
chr13@bin_572_c	-0.106667	0.92	-3.84143	0.011449	0.633161	-2.5477
chr14@bin_1944_c	-0.106667	0.2	-3.92101	0.010718	0.722148	-2.49225
chr14@bin_2211_c	-0.106667	0.836667	-2.86708	0.0342722	0.773328	-3.72331
chr15@bin_2523_w	-0.106667	0.376667	-6.83786	0.000918587	0.393526	0.0309137
chr15@bin_2164_c	-0.106667	0.758333	-6.12907	0.00152787	0.414982	-0.468393
chr15@bin_510_c	-0.106667	0.713333	-3.14951	0.0244942	0.76659	-3.34869
chr15@bin_574_c	-0.106667	0.853333	-2.57313	0.0486302	0.851106	-4.06709
chr16@bin_1570_c	-0.106667	0.28	-2.96611	0.0307545	0.793564	-3.62909
chr16@bin_1580_c	-0.106667	0.913333	-2.62393	0.0462287	0.831598	-4.05888
chr18@bin_1836_w	-0.106667	0.563333	-2.71661	0.0409288	0.804586	-3.87446
chr18@bin_2217_c	-0.106667	0.13	-2.68652	0.0424489	0.807925	-3.91248
chr19@bin_574_w	-0.106667	0.506667	-3.18154	0.0239368	0.716371	-3.36964
chr19@bin_2564_w	-0.106667	0.866667	-3.07571	0.0270102	0.721675	-3.49804
chr19@bin_2076_w	-0.106667	0.503333	-2.8121	0.0367707	0.721675	-3.82475
chr9@bin_3450_c	-0.106633	0.848883	-2.7545	0.0392879	0.813382	-3.89264
chr16@bin_2587_c	-0.106633	0.412217	-2.78655	0.0380053	0.813614	-3.85287
chr17@bin_845_w	-0.106	0.395667	-2.69359	0.0419625	0.797501	-3.92877
chr11@bin_594_c	-0.1056	0.751667	-4.36582	0.00702294	0.618449	-2.05858
chr8@bin_3012_w	-0.105577	0.102778	-3.32778	0.0199193	0.64522	-3.12973
chr4@bin_461_c	-0.105567	0.90055	-5.19872	0.00322054	0.495785	-1.22203
chr1@bin_367_w	-0.105533	0.823867	-3.88864	0.0109624	0.604702	-2.48824
chr2@bin_4093_w	-0.105533	0.598333	-4.54551	0.00581688	0.53318	-1.8457
chr6@bin_1028_w	-0.105533	0.585	-2.60173	0.0468917	0.79829	-4.06721
chr15@bin_3198_w	-0.105533	0.798333	-3.54432	0.0157757	0.76659	-2.88442
chr1@bin_5353_w	-0.105	0.944167	-5.81178	0.00194754	0.501878	-0.706772
chr1@bin_4536_c	-0.105	0.739167	-3.19574	0.0232299	0.696075	-3.27856
chr3@bin_2128_c	-0.105	0.680833	-6.3801	0.00124433	0.436075	-0.271151
chr3@bin_3504_w	-0.105	0.864167	-4.09212	0.00882151	0.555212	-2.28481
chr4@bin_1687_c	-0.105	0.9075	-3.95818	0.0102264	0.612835	-2.42624
chr4@bin_5136_w	-0.105	0.769167	-2.87015	0.0339684	0.750503	-3.6917
chr5@bin_3567_w	-0.105	0.805833	-3.04714	0.027536	0.805863	-3.47212
chr6@bin_3286_c	-0.105	0.724167	-6.74347	0.000975486	0.445347	-0.0313511
chr6@bin_740_c	-0.105	0.720833	-4.13591	0.00851624	0.683026	-2.26276
chr7@bin_1890_w	-0.105	0.750833	-4.57613	0.00556492	0.546733	-1.82103
chr7@bin_3360_c	-0.105	0.319167	-3.28934	0.0208381	0.692601	-3.22203
chr7@bin_31_w	-0.105	0.9475	-3.08662	0.0262618	0.718309	-3.46741
chr8@bin_2792_c	-0.105	0.320833	-4.02496	0.00947748	0.538893	-2.34693
chr9@bin_577_w	-0.105	0.465833	-6.19772	0.00149042	0.604483	-0.451323
chr11@bin_3926_w	-0.105	0.650833	-3.75801	0.0128533	0.680095	-2.70171
chr11@bin_6118_c	-0.105	0.7525	-3.08606	0.0267878	0.759358	-3.48414
chr11@bin_1380_w	-0.105	0.659167	-2.82082	0.0365033	0.77705	-3.81195
chr13@bin_107_w	-0.105	0.351667	-3.75393	0.0125464	0.633161	-2.6442
chr11@bin_4730_c	-0.104433	0.507783	-3.53448	0.0162806	0.734989	-2.95383
chr3@bin_1163_w	-0.103367	0.79835	-4.13029	0.00849088	0.555212	-2.24457
chr5@bin_2883_w	-0.103367	0.323883	-6.48081	0.00117656	0.518215	-0.210754
chr9@bin_3867_w	-0.103367	0.904983	-3.08577	0.0266139	0.807292	-3.48073
chr11@bin_5035_c	-0.103367	0.41945	-6.09552	0.00163798	0.415099	-0.542629
chr14@bin_3662_c	-0.103367	0.585483	-4.34053	0.00707621	0.677541	-2.05337
chr18@bin_427_w	-0.103367	0.45055	-3.58565	0.0151597	0.691227	-2.83064
chr1@bin_5504_w	-0.103333	0.738333	-2.68024	0.0426458	0.771571	-3.91474
chr2@bin_2055_c	-0.103333	0.921667	-4.12714	0.00869461	0.55897	-2.26902
chr2@bin_23_w	-0.103333	0.816667	-3.15847	0.0243901	0.697109	-3.3616
chr3@bin_3352_c	-0.103333	0.948333	-2.57873	0.0480565	0.720549	-4.07003
chr4@bin_4450_c	-0.103333	0.615	-10.8495	9.88391e-05	0.160277	1.99972
chr8@bin_280_w	-0.103333	0.568333	-2.91012	0.0322405	0.72493	-3.63628
chr9@bin_1548_w	-0.103333	0.895	-4.60796	0.00553034	0.691504	-1.81025
chr9@bin_2602_w	-0.103333	0.745	-4.60796	0.00553034	0.691504	-1.81025
chr9@bin_2280_w	-0.103333	0.861667	-4.09081	0.00907043	0.691504	-2.33466
chr9@bin_1800_c	-0.103333	0.671667	-3.32622	0.0202769	0.807292	-3.1916
chr9@bin_2664_c	-0.103333	0.908333	-2.86018	0.0346344	0.813382	-3.75969
chr11@bin_2750_c	-0.103333	0.885	-7.51837	0.000619792	0.377096	0.419606
chr12@bin_306_w	-0.103333	0.948333	-4.63133	0.00538715	0.646009	-1.75823
chr12@bin_3330_w	-0.103333	0.918333	-3.39078	0.018823	0.672392	-3.07787
chr14@bin_1527_w	-0.103333	0.948333	-2.80406	0.0369419	0.773328	-3.80221
chr15@bin_1476_c	-0.103333	0.781667	-3.10427	0.0258016	0.76659	-3.40347
chr16@bin_1408_c	-0.103333	0.881667	-3.57052	0.0156527	0.712032	-2.91054
chr18@bin_1836_c	-0.103333	0.718333	-3.15477	0.0244414	0.732877	-3.33394
chrX@bin_603_c	-0.103333	0.885	-5.39404	0.00160727	0.78893	-0.659968
chrX@bin_1475_c	-0.103333	0.948333	-2.70725	0.0347961	0.833766	-3.47313
chr1@bin_2630_w	-0.103333	0.831667	-3.04875	0.0275084	0.72564	-3.45621
chr2@bin_431_w	-0.103333	0.675	-3.73357	0.0129906	0.643674	-2.69402
chr2@bin_2011_c	-0.103333	0.837233	-2.99495	0.029454	0.697109	-3.56092
chr2@bin_6787_c	-0.103333	0.835	-2.90917	0.0325724	0.715693	-3.667
chr3@bin_1153_c	-0.103333	0.201667	-3.42897	0.0177442	0.642004	-3.02303
chr3@bin_3353_c	-0.103333	0.598333	-2.7375	0.0395689	0.720549	-3.86742
chr5@bin_2826_c	-0.103333	0.558333	-3.12358	0.0252064	0.799085	-3.37907
chr5@bin_3626_w	-0.103333	0.398333	-2.83561	0.0353331	0.829069	-3.73389
chr5@bin_1691_c	-0.103333	0.888333	-2.73088	0.0400758	0.852723	-3.86563
chr5@bin_3046_w	-0.103333	0.871667	-2.70646	0.0412797	0.859341	-3.89653
chr7@bin_426_w	-0.103333	0.315	-4.32119	0.00708947	0.584792	-2.07674
chr7@bin_4163_c	-0.103333	0.831667	-2.87097	0.0338267	0.75749	-3.73495
chr9@bin_1230_c	-0.103333	0.905	-3.35669	0.0196028	0.802903	-3.1556
chr9@bin_1023_c	-0.103333	0.618333	-3.01527	0.0288729	0.807292	-3.56715
chr10@bin_1700_c	-0.103333	0.785	-4.48094	0.00601048	0.611241	-1.86625
chr11@bin_819_w	-0.103333	0.598333	-3.88861	0.0112355	0.674093	-2.5583
chr11@bin_1978_w	-0.103333	0.275	-3.03134	0.0285282	0.759358	-3.55096
chr12@bin_1695_c	-0.103333	0.651667	-8.98701	0.000255298	0.403137	1.22124
chr12@bin_332_w	-0.103333	0.931667	-5.39219	0.00277763	0.644532	-1.0721
chr12@bin_1403_w	-0.103333	0.805	-2.76721	0.0386146	0.696	-3.83568
chr14@bin_3538_w	-0.103333	0.795833	-2.95927	0.0307441	0.764042	-3.60882
chr17@bin_3553_w	-0.103333	0.925	-3.87164	0.0111579	0.600939	-2.53095
chr19@bin_1671_c	-0.103333	0.801667	-6.50998	0.00119972	0.514482	-0.23176
chr19@bin_1413_c	-0.103333	0.758333	-2.80192	0.0372196	0.721675	-3.83756
chr10@bin_1945_c	-0.1033	0.766117	-3.58122	0.0149751	0.670707	-2.82293
chr19@bin_2570_c	-0.1033	0.826117	-3.0366	0.0282559	0.721675	-3.54591
chr15@bin_2223_c	-0.1025	0.199583	-3.35229	0.01948	0.76659	-3.10711
chr7@bin_3856_c	-0.102233	0.847783	-3.48798	0.0167169	0.671328	-2.98782
chr9@bin_2050_c	-0.102233	0.78665	-6.93265	0.000887166	0.604483	0.0667627
chr13@bin_614_w	-0.102233	0.691117	-2.56978	0.0486975	0.802191	-4.06924
chr3@bin_2419_w	-0.102233	0.91665	-3.23038	0.0221699	0.642004	-3.25829
chr7@bin_104_w	-0.102167	0.278883	-3.66289	0.0138396	0.652836	-2.78693
chr1@bin_4470_c	-0.101667	0.5825	-3.05325	0.0273649	0.72564	-3.45072
chr2@bin_4542_c	-0.101667	0.769167	-3.29337	0.0209411	0.693009	-3.2002
chr4@bin_3325_w	-0.101667	0.790833	-3.11787	0.0254255	0.716723	-3.38719
chr6@bin_1443_c	-0.101667	0.9425	-3.09503	0.0260339	0.752628	-3.44819
chr6@bin_2760_w	-0.101667	0.914167	-2.87332	0.0337619	0.774119	-3.72264
chr6@bin_2215_c	-0.101667	0.374167	-2.63214	0.0451747	0.79829	-4.02824
chr7@bin_2750_c	-0.101667	0.874167	-3.77527	0.0122888	0.644515	-2.66053
chr7@bin_4827_w	-0.101667	0.750833	-3.27282	0.0212295	0.692601	-3.24179
chr8@bin_1446_c	-0.101667	0.899167	-4.14801	0.00837732	0.521978	-2.2173
chr9@bin_2578_c	-0.101667	0.6625	-4.1247	0.00877075	0.691504	-2.29894
chr16@bin_2651_w	-0.101667	0.730833	-5.37492	0.00287541	0.572479	-1.12
chr16@bin_1490_c	-0.101667	0.9325	-2.81992	0.0365256	0.809241	-3.81097
chr18@bin_2648_c	-0.101667	0.891667	-4.57733	0.00562592	0.538938	-1.79089
chr19@bin_2114_w	-0.101667	0.185833	-4.90854	0.00424634	0.514482	-1.53209
chrY@bin_22_c	-0.101667	0.794167	-5.29692	0.00183402	0.0403484	-0.768327
chr12@bin_826_c	-0.101333	0.174	-2.5834	0.0482658	0.723599	-4.0688
chr13@bin_1242_w	-0.101333	0.744	-2.75706	0.038739	0.778631	-3.83096
chr19@bin_2148_c	-0.101133	0.8861	-2.81862	0.0364867	0.721675	-3.81657
chr7@bin_354_w	-0.101133	0.750567	-4.45133	0.0062581	0.566927	-1.94488
chr10@bin_1134_w	-0.101133	0.732767	-3.175	0.0235554	0.695299	-3.29942
chr1@bin_1950_w	-0.1011	0.834983	-3.74978	0.0126665	0.606372	-2.64016
chr2@bin_4800_w	-0.1011	0.88055	-5.34139	0.00288752	0.503624	-1.11724
chr14@bin_1718_c	-0.101067	0.428333	-2.73487	0.0401405	0.789632	-3.88939
chr6@bin_2695_c	-0.100833	0.24125	-4.77073	0.00466286	0.643584	-1.62804
chr7@bin_1084_w	-0.100833	0.315417	-3.68313	0.0135445	0.646569	-2.76401
chr8@bin_3868_w	-0.100667	0.139	-2.83057	0.0354459	0.741769	-3.73556
chr15@bin_3572_c	-0.100667	0.731667	-4.28984	0.007342	0.643851	-2.07879
chr4@bin_5746_w	-0.100033	0.726683	-2.64918	0.0443308	0.797689	-3.97004
chr1@bin_2645_c	-0.1	0.433333	-5.37693	0.00276528	0.561387	-1.06038
chr1@bin_3608_w	-0.1	0.771667	-3.47876	0.0169384	0.652389	-2.94609
chr1@bin_3151_c	-0.1	0.916667	-2.73258	0.0400218	0.771571	-3.84859
chr2@bin_2293_c	-0.1	0.905	-5.06423	0.0036522	0.503624	-1.35998
chr2@bin_83_c	-0.1	0.216667	-3.4416	0.0177701	0.66494	-3.02619
chr2@bin_6035_w	-0.1	0.31	-2.64732	0.044591	0.741407	-3.99658
chr3@bin_4479_w	-0.1	0.92	-3.79913	0.0119127	0.634891	-2.60181
chr4@bin_5368_c	-0.1	0.95	-6.90322	0.00088104	0.393585	0.0717023
chr4@bin_142_w	-0.1	0.563333	-3.16157	0.0241829	0.713906	-3.33439
chr4@bin_3471_c	-0.1	0.699167	-3.08727	0.0263382	0.718773	-3.42433
chr4@bin_479_c	-0.1	0.055	-2.60203	0.0469645	0.805528	-4.03011
chr5@bin_1358_w	-0.1	0.18	-3.93884	0.0103981	0.701347	-2.44497
chr5@bin_1406_c	-0.1	0.783333	-2.87854	0.0335712	0.82197	-3.68028
chr7@bin_2401_w	-0.1	0.923333	-5.19205	0.00321269	0.543993	-1.24562
chr7@bin_1465_w	-0.1	0.658333	-3.3779	0.0188735	0.680092	-3.11682
chr7@bin_4390_w	-0.1	0.33	-2.58701	0.0477142	0.804783	-4.096
chr7@bin_2025_c	-0.1	0.85	-2.58701	0.0477142	0.804783	-4.096
chr8@bin_2528_c	-0.1	0.83	-3.19373	0.0231789	0.688651	-3.28944
chr8@bin_32_w	-0.1	0.848333	-2.71156	0.0409179	0.762349	-3.88555
chr9@bin_1168_w	-0.1	0.198333	-3.97244	0.0102133	0.709659	-2.46091
chr9@bin_3536_w	-0.1	0.553333	-2.655	0.0443062	0.813382	-4.019
chr11@bin_5367_c	-0.1	0.796667	-5.17778	0.0033929	0.55897	-1.29278
chr11@bin_5245_c	-0.1	0.473333	-3.0761	0.0270954	0.759358	-3.49626
chr11@bin_4079_w	-0.1	0.511667	-2.94189	0.0316519	0.77705	-3.66113
chr13@bin_1845_c	-0.1	0.625	-3.59631	0.0148396	0.669045	-2.82129
chr13@bin_2277_c	-0.1	0.173333	-3.25157	0.0217165	0.732792	-3.22303
chr15@bin_3699_c	-0.1	0.688333	-4.02674	0.00952553	0.70297	-2.35234
chr15@bin_695_c	-0.1	0.433333	-2.85469	0.0345699	0.814935	-3.71089
chr15@bin_2268_c	-0.1	0.316667	-2.63397	0.0451302	0.843472	-3.98942
chr16@bin_2914_w	-0.1	0.835	-3.04494	0.0280691	0.793564	-3.53221
chr17@bin_1979_c	-0.1	0.881667	-7.45513	0.000610269	0.24175	0.423238
chr17@bin_627_c	-0.1	0.923333	-6.39067	0.00125925	0.377722	-0.27948
chr19@bin_92_w	-0.1	0.827333	-3.5969	0.0151572	0.655165	-2.88265
chrX@bin_178_c	-0.1	0.87	-3.11192	0.0204574	0.807883	-2.97055
chrX@bin_1991_w	-0.1	0.87	-2.56884	0.0419278	0.833766	-3.64933
chr1@bin_5188_c	0.1	0.9	9.93384	0.000151877	0.272725	1.63907
chr1@bin_3704_c	0.1	0.2789	4.20437	0.00797862	0.561387	-2.15506
chr1@bin_1550_c	0.1	0.92	4.19299	0.00806852	0.561387	-2.16679
chr1@bin_1794_w	0.1	0.77	2.8061	0.036631	0.755205	-3.75621
chr1@bin_1011_w	0.1	0.87	2.60137	0.0469635	0.774566	-4.01498
chr2@bin_3043_w	0.1	0.24	4.20329	0.00806623	0.553862	-2.18981
chr2@bin_253_c	0.1	0.923333	2.97321	0.0302117	0.697109	-3.58771
chr3@bin_1211_w	0.1	0.515	4.24871	0.00755239	0.555212	-2.12131
chr3@bin_1820_c	0.1	0.271667	3.75277	0.0125077	0.639335	-2.65331
chr3@bin_4144_w	0.1	0.536667	3.25716	0.0215063	0.642004	-3.2262
chr4@bin_2482_c	0.1	0.923333	3.16157	0.0241829	0.713906	-3.33439
chr7@bin_2651_c	0.1	0.266667	3.19424	0.023208	0.695108	-3.33636
chr8@bin_4195_w	0.1	0.87	3.00173	0.0289413	0.723708	-3.52298
chr10@bin_1201_c	0.1	0.123333	7.6525	0.000521723	0.343958	0.560378
chr11@bin_1168_w	0.1	0.92	3.41957	0.0184404	0.752507	-3.08666
chr11@bin_2437_w	0.1	0.893333	2.69933	0.0422126	0.805417	-3.9651
chr12@bin_3193_c	0.1	0.74	3.02925	0.02834	0.689126	-3.51036
chr13@bin_137_c	0.1	0.393333	2.82099	0.0358706	0.772678	-3.75051
chr13@bin_2136_w	0.1	0.216667	2.73763	0.0396603	0.778631	-3.85551
chr15@bin_1976_w	0.1	0.383333	6.28575	0.00135994	0.393526	-0.352895
chr15@bin_1628_c	0.1	0.456667	2.87763	0.0336395	0.81452	-3.68229
chr18@bin_1684_c	0.1	0.141667	2.77036	0.0383602	0.784894	-3.80681
chr19@bin_2420_w	0.1	0.643333	2.67733	0.0432281	0.734805	-3.99517
chr5@bin_2488_c	0.100033	0.763883	5.23006	0.00312167	0.58612	-1.19131
chr17@bin_1013_w	0.100233	0.29485	5.1931	0.00322841	0.410446	-1.2327
chr17@bin_129_c	0.100567	0.787483	2.60156	0.0469559	0.815073	-4.04609
chr4@bin_290_c	0.100833	0.817083	2.66306	0.0435861	0.797689	-3.95238
chr4@bin_5920_c	0.1011	0.794983	2.61303	0.0463354	0.801868	-4.01608
chr12@bin_933_w	0.1011	0.226117	3.88048	0.011175	0.647364	-2.526
chrX@bin_1559_w	0.101167	0.773883	4.27278	0.00509863	0.78893	-1.67755
chr1@bin_2679_c	0.101333	0.806667	5.15565	0.00333259	0.561387	-1.25064
chr1@bin_3505_c	0.101667	0.640833	3.385	0.0187805	0.657167	-3.0548
chr2@bin_5510_w	0.101667	0.884167	3.27106	0.0214716	0.696882	-3.2267
chr4@bin_3417_w	0.101667	0.7975	4.80272	0.00455415	0.514218	-1.57966
chr4@bin_5017_c	0.101667	0.519167	4.77967	0.00464976	0.514218	-1.60122
chr5@bin_159_w	0.101667	0.800833	2.92128	0.0319129	0.818606	-3.62714
chr6@bin_3178_w	0.101667	0.734167	4.3546	0.00687654	0.679256	-2.03667
chr7@bin_2837_w	0.101667	0.615833	10.0121	0.000144543	0.230459	1.73562
chr9@bin_1161_w	0.101667	0.4825	2.86226	0.0345489	0.813382	-3.75708
chr11@bin_5950_w	0.101667	0.4075	4.68142	0.00523923	0.618449	-1.74866
chr11@bin_5447_w	0.101667	0.439167	4.29049	0.00754704	0.618449	-2.13494
chr14@bin_2588_c	0.101667	0.205	2.87646	0.0338934	0.773328	-3.71161
chr18@bin_2755_w	0.101667	0.879167	3.1821	0.0236913	0.728897	-3.30113
chr4@bin_3551_c	0.101833	0.41575	2.81104	0.0364499	0.762555	-3.76558
chr2@bin_4523_c	0.1022	0.896667	3.4647	0.0173266	0.663887	-2.9994
chr3@bin_1556_c	0.1022	0.718867	2.97623	0.0297486	0.689593	-3.56821
chr16@bin_2844_w	0.1022	0.74	3.27915	0.0215205	0.793564	-3.2498
chr17@bin_3116_w	0.1022	0.796667	3.77376	0.0123535	0.6035	-2.63861
chr6@bin_1858_w	0.102233	0.86665	4.44223	0.00632385	0.672703	-1.94828
chr10@bin_714_w	0.102233	0.932217	3.69565	0.0132432	0.648504	-2.69362
chrX@bin_713_c	0.102433	0.318183	3.78492	0.00891538	0.807883	-2.1913
chr2@bin_3175_c	0.1025	0.65125	2.86117	0.0344764	0.720429	-3.7268
chr8@bin_3632_c	0.1025	0.802083	2.61086	0.046277	0.762349	-4.01368
chr19@bin_71_w	0.1025	0.80375	2.8695	0.0343504	0.721675	-3.75282
chr4@bin_5309_c	0.102667	0.917333	4.11427	0.00873886	0.581353	-2.26082
chr1@bin_1253_w	0.1033	0.893883	2.59791	0.0471635	0.774566	-4.01939
chr15@bin_4083_c	0.1033	0.873883	3.81582	0.0118242	0.746117	-2.58011
chr1@bin_2806_c	0.103333	0.891667	2.8898	0.0331513	0.740537	-3.65183
chr2@bin_5013_c	0.103333	0.735	3.03749	0.028032	0.697109	-3.50869
chr2@bin_5080_c	0.103333	0.891667	2.91925	0.0321877	0.71242	-3.65449
chr3@bin_1079_w	0.103333	0.868333	2.71548	0.0406409	0.720549	-3.89536
chr3@bin_3982_w	0.103333	0.235	2.65834	0.0435753	0.720549	-3.96812
chr3@bin_2633_c	0.103333	0.441667	2.64332	0.0443847	0.720549	-3.9873
chr4@bin_2274_c	0.103333	0.811667	5.81314	0.00195121	0.456422	-0.712484
chr4@bin_2035_c	0.103333	0.85	5.0295	0.0037256	0.495785	-1.37193
chr4@bin_1770_w	0.103333	0.247233	3.43047	0.0178851	0.675723	-3.0161
chr5@bin_652_c	0.103333	0.26	5.37279	0.0027691	0.58612	-1.06868
chr5@bin_2237_w	0.103333	0.865	2.58645	0.0478022	0.866364	-4.0493
chr6@bin_3090_c	0.103333	0.868333	3.02402	0.0282706	0.752628	-3.53534
chr7@bin_2607_c	0.103333	0.771667	3.83716	0.0115199	0.625469	-2.59183
chr7@bin_4863_c	0.103333	0.841667	3.02635	0.0281667	0.727028	-3.54154
chr7@bin_466_w	0.103333	0.796667	2.59915	0.0470065	0.804783	-4.08039
chr7@bin_552_c	0.103333	0.811667	2.5781	0.0482411	0.804783	-4.10747
chr8@bin_3499_c	0.103333	0.421667	2.83819	0.035124	0.740014	-3.72601
chr9@bin_1598_c	0.103333	0.925	4.02266	0.00970939	0.706208	-2.40707
chr10@bin_938_w	0.103333	0.8475	4.11654	0.00857415	0.611241	-2.23719
chr10@bin_1193_w	0.103333	0.896667	3.69738	0.0132188	0.648504	-2.69169
chr10@bin_3247_c	0.103333	0.125	3.50931	0.0161945	0.68566	-2.9053
chr10@bin_3470_w	0.103333	0.925	3.50931	0.0161945	0.68566	-2.9053
chr10@bin_535_w	0.103333	0.181667	3.37791	0.0187244	0.688772	-3.05805
chr10@bin_1885_w	0.103333	0.316667	3.03208	0.0277963	0.707403	-3.47322
chr10@bin_2620_w	0.103333	0.711667	2.59922	0.0467734	0.773929	-4.01631
chr11@bin_975_w	0.103333	0.785	4.60052	0.0056406	0.618449	-1.82658
chr11@bin_111_c	0.103333	0.141667	2.69619	0.0423727	0.805417	-3.96908
chr13@bin_2965_w	0.103333	0.218333	2.92509	0.0316887	0.765968	-3.6206
chr13@bin_1522_c	0.103333	0.895	2.63193	0.0451124	0.802191	-3.98977
chr14@bin_2290_c	0.103333	0.648333	2.67827	0.0429842	0.808941	-3.9611
chr15@bin_1333_c	0.103333	0.181667	4.40764	0.0065553	0.602888	-1.96007
chr16@bin_1318_c	0.103333	0.948333	3.36549	0.0195556	0.76842	-3.14783
chr16@bin_2254_c	0.103333	0.655	3.14007	0.0251716	0.793564	-3.4165
chr16@bin_830_c	0.103333	0.5	2.71274	0.0415189	0.829602	-3.94601
chr18@bin_323_c	0.103333	0.231667	4.07477	0.00913005	0.616342	-2.29701
chr19@bin_515_c	0.103333	0.0516667	5.37218	0.00286144	0.514482	-1.11969
chr19@bin_2351_w	0.103333	0.435	3.5563	0.0158305	0.660403	-2.92902
chrX@bin_1523_c	0.103333	0.6872	3.54058	0.0119573	0.807883	-2.46508
chr13@bin_3967_c	0.103367	0.85835	7.95296	0.000441996	0.310866	0.719162
chr9@bin_1108_w	0.103367	0.206117	2.71775	0.0410649	0.813382	-3.93919
chr11@bin_228_c	0.103767	0.777683	3.77897	0.0125766	0.676608	-2.67851
chr11@bin_1502_w	0.1039	0.90915	3.72273	0.013335	0.686717	-2.74095
chr4@bin_3292_c	0.104167	0.60375	3.70021	0.0133675	0.633835	-2.70871
chr4@bin_1633_w	0.104433	0.841117	2.67492	0.0429608	0.796194	-3.93732
chr5@bin_2104_c	0.104433	0.64555	3.1104	0.025592	0.799085	-3.39506
chr18@bin_2913_w	0.104433	0.91445	4.68233	0.00510718	0.525043	-1.69039
chr13@bin_2999_c	0.104467	0.877767	5.4872	0.00250289	0.398239	-0.967243
chrX@bin_1077_w	0.104667	0.357667	4.09091	0.00625309	0.78893	-1.86391
chr1@bin_4960_w	0.105	0.784167	4.24411	0.00767385	0.561387	-2.11433
chr3@bin_2490_c	0.105	0.0775	3.21376	0.0225934	0.645212	-3.27827
chr4@bin_4954_c	0.105	0.734167	3.15027	0.0244974	0.716723	-3.34801
chr4@bin_6523_w	0.105	0.914167	2.64804	0.0443925	0.797689	-3.97149
chr5@bin_2253_w	0.105	0.0858333	2.6498	0.044229	0.860074	-3.96848
chr6@bin_2948_w	0.105	0.394167	4.24405	0.00765503	0.679256	-2.14997
chr10@bin_3434_w	0.105	0.5875	5.39196	0.00267265	0.567206	-1.03215
chr11@bin_4974_w	0.105	0.9325	7.72984	0.000543739	0.377096	0.544944
chr11@bin_1876_c	0.105	0.824167	2.60165	0.0475189	0.821532	-4.08942
chr14@bin_1803_c	0.105	0.899167	4.25309	0.00769955	0.677541	-2.14241
chr15@bin_1667_w	0.105	0.744167	2.6114	0.0463952	0.851106	-4.01819
chr18@bin_1566_w	0.105	0.825833	2.6391	0.0449719	0.815577	-3.97259
chr10@bin_3034_c	0.105333	0.389333	3.58114	0.0149763	0.670707	-2.82301
chr1@bin_3937_c	0.105567	0.38055	3.9265	0.0105443	0.604702	-2.44739
chr4@bin_3111_c	0.105567	0.306117	3.26167	0.021585	0.686852	-3.21456
chr5@bin_5286_c	0.105567	0.80725	2.92069	0.0319352	0.818606	-3.62787
chr5@bin_4806_c	0.105833	0.604583	2.75513	0.0389182	0.85177	-3.83501
chrX@bin_1353_w	0.106633	0.48555	2.85377	0.0286359	0.833766	-3.28874
chr1@bin_5669_c	0.106667	0.898333	4.46403	0.00621124	0.561387	-1.89367
chr1@bin_3748_c	0.106667	0.646667	3.25957	0.0216089	0.686406	-3.20247
chr1@bin_3668_w	0.106667	0.338333	2.74875	0.0392472	0.771571	-3.82822
chr4@bin_4476_c	0.106667	0.933333	4.09086	0.00894531	0.581353	-2.28537
chr4@bin_6203_w	0.106667	0.526667	3.14852	0.0245465	0.716723	-3.35012
chr5@bin_4446_w	0.106667	0.93	3.46559	0.0171658	0.74995	-2.97384
chr5@bin_2347_w	0.106667	0.513333	3.34554	0.0196025	0.750238	-3.11395
chr5@bin_2851_c	0.106667	0.606667	2.73572	0.0398417	0.851859	-3.85952
chr5@bin_1449_c	0.106667	0.823333	2.61382	0.0462211	0.866364	-4.01433
chr6@bin_3023_c	0.106667	0.915	3.65425	0.0139864	0.739724	-2.78904
chr8@bin_666_w	0.106667	0.855	5.00592	0.00375998	0.471163	-1.3831
chr8@bin_4059_c	0.106667	0.173333	4.78379	0.0045831	0.476488	-1.58775
chr9@bin_2391_w	0.106667	0.776667	4.18013	0.0083048	0.691504	-2.24093
chr9@bin_3209_w	0.106667	0.125	2.66518	0.0437618	0.813382	-4.00603
chr10@bin_4475_w	0.106667	0.655	5.49314	0.0024579	0.567206	-0.947219
chr11@bin_5922_c	0.106667	0.163333	3.3808	0.019241	0.752507	-3.13196
chr11@bin_4915_c	0.106667	0.37	2.59621	0.0478354	0.821532	-4.09638
chr11@bin_3546_c	0.106667	0.92	2.57621	0.0490177	0.821532	-4.12195
chr13@bin_3446_w	0.106667	0.596667	5.3781	0.00273892	0.398239	-1.05906
chr13@bin_1816_c	0.106667	0.81	4.74384	0.00475724	0.46246	-1.62772
chr14@bin_3091_w	0.106667	0.936667	3.3748	0.0191542	0.75379	-3.10807
chr15@bin_1689_c	0.106667	0.8411	2.99039	0.0294509	0.779268	-3.54266
chr15@bin_287_c	0.106667	0.253333	2.84394	0.0350161	0.816214	-3.72433
chr16@bin_2405_w	0.106667	0.77	5.13859	0.00350327	0.572479	-1.3255
chr16@bin_424_c	0.106667	0.805833	4.53467	0.00598785	0.609002	-1.88878
chr19@bin_1096_c	0.106667	0.666667	2.8121	0.0367707	0.721675	-3.82475
chrX@bin_1335_w	0.106667	0.896667	2.75342	0.0327146	0.833766	-3.41477
chr4@bin_6413_c	0.1067	0.596683	3.1328	0.024993	0.716723	-3.36912
chr9@bin_22_c	0.1067	0.92555	2.95191	0.031087	0.807292	-3.64542
chr10@bin_2239_c	0.1067	0.39665	2.74891	0.0389478	0.752133	-3.82597
chr4@bin_74_c	0.107333	0.757667	2.96912	0.0302216	0.737155	-3.56901
chr4@bin_193_w	0.107433	0.808517	7.22538	0.000710489	0.349134	0.277665
chr18@bin_2322_c	0.1075	0.427083	4.14401	0.00852252	0.616342	-2.22477
chr1@bin_842_w	0.107767	0.871683	3.61565	0.0146048	0.623794	-2.79001
chr10@bin_2423_w	0.107767	0.290017	2.56072	0.0490537	0.773929	-4.06562
chr15@bin_3223_w	0.108	0.770667	2.77838	0.0378764	0.817395	-3.80654
chr1@bin_4133_w	0.108333	0.850833	3.74422	0.0127407	0.606372	-2.64631
chr1@bin_4142_c	0.108333	0.529167	3.27107	0.0213304	0.686406	-3.18882
chr3@bin_1794_w	0.108333	0.500833	3.22594	0.0222821	0.642004	-3.26362
chr6@bin_3929_c	0.108333	0.6875	2.79664	0.0370025	0.786885	-3.81907
chr7@bin_169_w	0.108333	0.460833	3.25525	0.0216549	0.692601	-3.26285
chr10@bin_3177_w	0.108333	0.179167	3.12715	0.0248889	0.695299	-3.35727
chr14@bin_1808_c	0.108333	0.885833	4.68142	0.00514386	0.677541	-1.71819
chr17@bin_3892_w	0.108333	0.385833	3.16556	0.0240463	0.70813	-3.34328
chr19@bin_1760_c	0.108333	0.100833	3.90416	0.0109997	0.572577	-2.54071
chr2@bin_6754_w	0.109167	0.342083	4.47203	0.0062313	0.53318	-1.91797
chr4@bin_6241_w	0.109167	0.41125	3.08893	0.0262876	0.718773	-3.42231
chr2@bin_524_c	0.109333	0.27	3.45629	0.0174866	0.663887	-3.00914
chr13@bin_1247_c	0.109467	0.711967	3.98274	0.00990023	0.619137	-2.39462
chr1@bin_5434_c	0.11	0.918333	4.26878	0.00749141	0.561387	-2.08917
chr1@bin_540_c	0.11	0.828333	2.94233	0.0311551	0.735738	-3.58678
chr2@bin_6845_c	0.11	0.868333	4.55418	0.00577013	0.53318	-1.83724
chr2@bin_1032_w	0.11	0.811667	4.19449	0.00813615	0.553862	-2.19891
chr2@bin_4567_w	0.11	0.831667	2.90102	0.0328871	0.715693	-3.67713
chr3@bin_2029_w	0.11	0.788333	5.89361	0.00179539	0.436075	-0.637393
chr3@bin_198_c	0.11	0.911667	5.68651	0.00211392	0.436075	-0.802535
chr3@bin_489_w	0.11	0.8739	3.35095	0.019352	0.642004	-3.1147
chr3@bin_1863_w	0.11	0.0716667	3.14057	0.024569	0.67198	-3.36672
chr3@bin_3185_w	0.11	0.915	2.79813	0.0367738	0.714289	-3.79076
chr3@bin_2177_w	0.11	0.055	2.60875	0.0463104	0.720549	-4.03153
chr4@bin_2916_w	0.11	0.426667	5.12263	0.00343708	0.495785	-1.2889
chr4@bin_4835_c	0.11	0.361667	3.72831	0.0129767	0.633835	-2.6774
chr4@bin_3528_c	0.11	0.305	3.18732	0.0234826	0.712305	-3.30342
chr4@bin_5291_c	0.11	0.559433	2.70883	0.041227	0.793554	-3.89434
chr5@bin_2221_c	0.11	0.918333	7.40489	0.000628149	0.45434	0.393324
chr5@bin_3610_c	0.11	0.263333	4.19428	0.00804641	0.661449	-2.1753
chr5@bin_578_c	0.11	0.895	3.05867	0.0271697	0.799085	-3.45803
chr6@bin_897_c	0.11	0.685	3.34537	0.0195926	0.739724	-3.14694
chr6@bin_3066_w	0.11	0.888333	2.57505	0.0484577	0.79829	-4.10148
chr7@bin_1710_c	0.11	0.213333	3.03103	0.0280131	0.727028	-3.53575
chr8@bin_2304_c	0.11	0.0916667	3.23953	0.0220022	0.687348	-3.23455
chr10@bin_3593_c	0.11	0.155	3.40564	0.0181555	0.688772	-3.02559
chr10@bin_3836_w	0.11	0.901667	3.24274	0.0218021	0.695299	-3.21812
chr10@bin_3824_w	0.11	0.858333	2.61489	0.0458786	0.773929	-3.99627
chr11@bin_244_c	0.11	0.439167	12.1434	6.10934e-05	0.197088	2.43269
chr11@bin_1799_w	0.11	0.758333	5.17451	0.00340228	0.55897	-1.29566
chr11@bin_2664_w	0.11	0.391667	2.63205	0.0457931	0.821532	-4.05063
chr12@bin_3579_w	0.11	0.555	5.14727	0.00341121	0.644532	-1.28343
chr12@bin_494_w	0.11	0.781667	2.76977	0.0384959	0.696	-3.83245
chr13@bin_1003_w	0.11	0.571667	4.57614	0.0055523	0.488013	-1.78851
chr13@bin_1608_w	0.11	0.821667	3.62672	0.0143624	0.668253	-2.7868
chr13@bin_3571_w	0.11	0.341667	3.35447	0.0193452	0.704213	-3.10108
chr13@bin_2031_w	0.11	0.798333	2.9546	0.0306038	0.765968	-3.58404
chr15@bin_177_c	0.11	0.341667	3.19999	0.0231227	0.76659	-3.28796
chr16@bin_2887_c	0.11	0.0983333	3.0588	0.0276247	0.793564	-3.51527
chr16@bin_1062_c	0.11	0.931667	2.99845	0.0296194	0.793564	-3.58923
chr17@bin_3610_w	0.11	0.52	7.50974	0.000589421	0.24175	0.456138
chr17@bin_454_w	0.11	0.735	3.34008	0.0197448	0.683689	-3.13492
chr17@bin_2502_c	0.11	0.268333	3.20245	0.0230559	0.706996	-3.29884
chr17@bin_3159_w	0.11	0.634033	2.81184	0.0363826	0.758326	-3.77936
chr17@bin_2469_c	0.11	0.691667	2.71021	0.0411243	0.787737	-3.90768
chrX@bin_2010_c	0.11	0.317	4.14736	0.00586612	0.78893	-1.80541
chr1@bin_5747_w	0.110667	0.883333	3.87323	0.0111379	0.604702	-2.50494
chr11@bin_4201_c	0.110833	0.807917	9.29023	0.000225749	0.367712	1.35429
chr7@bin_2705_w	0.111067	0.4689	6.67648	0.00101915	0.439125	-0.076701
chr5@bin_5004_w	0.1111	0.807783	4.67751	0.00508247	0.61433	-1.69497
chr17@bin_1918_w	0.1111	0.681117	2.74242	0.0395519	0.778926	-3.86689
chr18@bin_1562_c	0.111133	0.833333	7.43385	0.000626508	0.240067	0.395902
chr12@bin_528_c	0.111567	0.74525	3.54879	0.0158432	0.672392	-2.8954
chr2@bin_2150_c	0.111667	0.925833	3.49954	0.0166811	0.663887	-2.95914
chr4@bin_5277_w	0.111667	0.865833	4.76186	0.00472523	0.514218	-1.61794
chr18@bin_2511_c	0.111667	0.899167	3.08843	0.0263753	0.732877	-3.41405
chr2@bin_5439_c	0.111667	0.6725	5.17283	0.00332737	0.503624	-1.26352
chr2@bin_4531_c	0.111667	0.429167	3.89357	0.011003	0.628126	-2.51808
chr2@bin_3094_c	0.111667	0.5675	3.21087	0.0229796	0.697109	-3.29857
chr4@bin_4527_c	0.111667	0.6925	3.53042	0.0160347	0.660278	-2.90078
chr6@bin_3457_c	0.111667	0.6975	2.90157	0.0326485	0.774119	-3.6873
chr9@bin_3616_c	0.111667	0.7925	2.60055	0.0473471	0.82135	-4.08858
chr12@bin_3896_w	0.111667	0.749167	2.68844	0.042463	0.714669	-3.93513
chr17@bin_1496_w	0.111667	0.550833	3.09584	0.0260512	0.723237	-3.42783
chrX@bin_1994_w	0.111667	0.640833	2.89308	0.0271903	0.833766	-3.2397
chr13@bin_1518_w	0.111917	0.101195	2.55804	0.0494086	0.802191	-4.08428
chr11@bin_3683_c	0.1122	0.225	3.5179	0.0165738	0.735508	-2.97286
chr1@bin_5912_c	0.112233	0.771683	2.76294	0.0385813	0.771571	-3.81036
chr15@bin_1385_w	0.112233	0.817217	6.81395	0.000933814	0.393526	0.0150099
chr16@bin_13_w	0.1133	0.871117	2.60538	0.0472849	0.831598	-4.08255
chr8@bin_2442_c	0.11331	0.0788783	4.19671	0.007983	0.521978	-2.16671
chr1@bin_3739_w	0.113333	0.0633333	2.73262	0.04002	0.771571	-3.84855
chr2@bin_4455_w	0.113333	0.833333	2.81737	0.0363215	0.734215	-3.78161
chr2@bin_1066_w	0.113333	0.641667	2.71025	0.0413109	0.741407	-3.91664
chr3@bin_2038_c	0.113333	0.326667	2.68131	0.0423685	0.720549	-3.93882
chr4@bin_5031_w	0.113333	0.793333	6.65531	0.00104572	0.3986	-0.0943745
chr4@bin_5353_c	0.113333	0.644167	4.31063	0.00720752	0.581353	-2.05857
chr4@bin_125_w	0.113333	0.933333	2.75394	0.0390387	0.777462	-3.83737
chr5@bin_2354_c	0.113333	0.0566667	12.4958	4.84767e-05	0.213516	2.53302
chr5@bin_2642_w	0.113333	0.806667	6.15424	0.00149491	0.527503	-0.447255
chr5@bin_4345_c	0.113333	0.441667	3.17265	0.0238276	0.795067	-3.31981
chr6@bin_2930_c	0.113333	0.221667	4.24231	0.0076681	0.679256	-2.15177
chr6@bin_604_w	0.113333	0.746667	2.55227	0.0498391	0.79829	-4.13078
chr7@bin_4905_c	0.113333	0.52	3.80029	0.0119711	0.632427	-2.63268
chr8@bin_4327_c	0.113333	0.926667	8.29799	0.000359378	0.346397	0.906175
chr8@bin_4016_w	0.113333	0.913333	3.05379	0.0272349	0.714306	-3.45912
chr9@bin_684_c	0.113333	0.526667	6.71515	0.00102932	0.604483	-0.0802184
chr10@bin_1237_w	0.113333	0.593333	3.31632	0.0200616	0.688772	-3.13063
chr11@bin_5667_w	0.113333	0.61	4.58983	0.00569627	0.618449	-1.83695
chr11@bin_1586_w	0.113333	0.85	3.05924	0.0276253	0.759358	-3.51683
chr11@bin_5285_w	0.113333	0.796667	2.88075	0.0340056	0.77705	-3.73704
chr12@bin_2060_w	0.113333	0.865	4.97201	0.00396901	0.644532	-1.44012
chr13@bin_1036_w	0.113333	0.826667	7.34651	0.000646219	0.310866	0.365238
chr13@bin_3911_c	0.113333	0.886667	3.24198	0.0219536	0.732792	-3.23447
chr14@bin_689_c	0.113333	0.156667	5.67784	0.00220369	0.629219	-0.840975
chr14@bin_2209_w	0.113333	0.583333	2.71959	0.0408873	0.793382	-3.90871
chr16@bin_2624_c	0.113333	0.526667	5.3833	0.00285568	0.572479	-1.11286
chr16@bin_630_c	0.113333	0.85	3.05958	0.0276	0.793564	-3.51432
chr17@bin_4068_w	0.113333	0.826667	5.82123	0.0019337	0.410446	-0.709004
chr17@bin_1951_c	0.113333	0.3	5.1805	0.00326328	0.410446	-1.24378
chr18@bin_1961_w	0.113333	0.923333	3.01662	0.0286637	0.736972	-3.50149
chrX@bin_689_c	0.113333	0.778333	3.18666	0.0185922	0.807883	-2.88025
chrX@bin_1200_c	0.113333	0.91	3.13058	0.0199733	0.807883	-2.94792
chrX@bin_2339_c	0.113333	0.546667	2.54471	0.0433226	0.833766	-3.68022
chr9@bin_1175_w	0.113367	0.862217	3.44373	0.0178127	0.793306	-3.0536
chr15@bin_2397_w	0.114433	0.892783	7.6322	0.000545825	0.393526	0.525587
chr4@bin_5643_w	0.114467	0.3839	4.20601	0.00798115	0.581353	-2.16553
chr6@bin_1451_c	0.114467	0.890567	4.80933	0.00450312	0.636334	-1.59154
chr1@bin_2506_w	0.115	0.390833	2.89961	0.032768	0.738845	-3.63965
chr2@bin_4859_c	0.115	0.734167	3.85498	0.0114485	0.635549	-2.56012
chr2@bin_6423_w	0.115	0.3975	3.35843	0.0194767	0.674929	-3.12339
chr2@bin_2034_w	0.115	0.780833	3.08222	0.026619	0.697109	-3.45406
chr2@bin_2082_w	0.115	0.870833	2.77964	0.0379987	0.736627	-3.82902
chr4@bin_3411_w	0.115	0.719167	2.9494	0.03093	0.737155	-3.59335
chr8@bin_3160_c	0.115	0.185833	2.97973	0.0296978	0.723708	-3.55008
chr13@bin_2280_c	0.115	0.624167	5.2507	0.00304817	0.398618	-1.16845
chr14@bin_1196_w	0.115	0.859167	3.48961	0.0168879	0.75379	-2.9745
chr14@bin_3055_c	0.115	0.738333	3.12566	0.0253545	0.764042	-3.40518
chr15@bin_414_c	0.115	0.809167	3.57927	0.0151911	0.76659	-2.84455
chr18@bin_2707_c	0.115	0.374167	2.57587	0.0485945	0.818699	-4.05309
chrX@bin_2242_c	0.115333	0.293667	3.30452	0.0160169	0.807883	-2.73964
chr8@bin_2109_w	0.115533	0.676667	3.75916	0.0124685	0.599494	-2.63569
chr7@bin_2038_w	0.115567	0.49445	4.24774	0.00761454	0.585499	-2.15238
chr12@bin_3823_c	0.115567	0.49555	3.18733	0.023637	0.686479	-3.31877
chr12@bin_600_w	0.116067	0.4444	3.95243	0.0103833	0.647364	-2.44833
chr8@bin_2279_w	0.1161	0.282483	3.33711	0.0197122	0.64522	-3.11872
chr1@bin_3015_c	0.116667	0.868333	2.97456	0.029997	0.735738	-3.54708
chr5@bin_618_c	0.116667	0.921667	4.10198	0.0088177	0.669613	-2.27148
chr1@bin_3384_c	0.116667	0.941667	4.65037	0.00521975	0.561387	-1.71295
chr1@bin_69_w	0.116667	0.875	4.21014	0.00793357	0.561387	-2.14914
chr1@bin_4704_c	0.116667	0.915	3.31934	0.0202051	0.676402	-3.13178
chr1@bin_2378_c	0.116667	0.518333	3.05287	0.0273771	0.72564	-3.45118
chr2@bin_6747_w	0.116667	0.81	5.9248	0.00181167	0.388452	-0.641686
chr2@bin_6817_c	0.116667	0.801667	2.76939	0.0384693	0.737521	-3.84193
chr2@bin_3830_w	0.116667	0.275	2.58034	0.0483983	0.745151	-4.08209
chr3@bin_4292_w	0.116667	0.895	3.40335	0.018255	0.642004	-3.05302
chr3@bin_2917_c	0.116667	0.540533	3.18964	0.0232241	0.657406	-3.30733
chr4@bin_60_w	0.116667	0.861667	4.23794	0.00773534	0.581353	-2.13269
chr4@bin_5972_c	0.116667	0.336667	3.72909	0.0129661	0.633835	-2.67653
chr4@bin_1547_w	0.116667	0.745	2.6165	0.0461386	0.801868	-4.01165
chr6@bin_2335_w	0.116667	0.696133	8.64212	0.000298166	0.348764	1.09286
chr6@bin_2932_c	0.116667	0.255	3.29441	0.0207428	0.739724	-3.20747
chr7@bin_2361_w	0.116667	0.621667	3.45547	0.0173233	0.673405	-3.02571
chr7@bin_1233_c	0.116667	0.773333	2.5704	0.0487011	0.804783	-4.11737
chr8@bin_1176_w	0.116667	0.931667	2.93097	0.0314544	0.72493	-3.61039
chr8@bin_3153_w	0.116667	0.268333	2.75636	0.0387557	0.751416	-3.82889
chr8@bin_4253_w	0.116667	0.778333	2.64413	0.0444261	0.762349	-3.97124
chr10@bin_3425_c	0.116667	0.671667	3.20796	0.0226831	0.695299	-3.25977
chr11@bin_2882_w	0.116667	0.360533	3.837	0.0118452	0.674093	-2.61463
chr11@bin_560_c	0.116667	0.235	3.38439	0.0191652	0.752507	-3.12776
chr15@bin_3830_w	0.116667	0.688333	3.56811	0.015375	0.76659	-2.85726
chr15@bin_1564_c	0.116667	0.886667	3.50482	0.0164673	0.76659	-2.92973
chr15@bin_1835_c	0.116667	0.621667	2.57292	0.0486432	0.851106	-4.06737
chr16@bin_1247_c	0.116667	0.721667	2.56229	0.0498409	0.845052	-4.13767
chr17@bin_2727_c	0.116667	0.938333	6.0978	0.00156383	0.394211	-0.495308
chr17@bin_2823_c	0.116667	0.848333	2.92884	0.0316577	0.733019	-3.63322
chr17@bin_1393_c	0.116667	0.628333	2.66854	0.0432613	0.806605	-3.96062
chr18@bin_1046_w	0.116667	0.745	2.84585	0.0350482	0.777517	-3.71238
chr18@bin_2329_w	0.116667	0.205	2.56344	0.0493437	0.818699	-4.06897
chrX@bin_219_w	0.116667	0.858333	4.08662	0.00628362	0.78893	-1.86837
chrX@bin_2461_c	0.116667	0.825	3.57713	0.0114369	0.807883	-2.42344
chr4@bin_414_w	0.1167	0.653883	3.7068	0.0132747	0.633835	-2.70135
chr10@bin_4584_c	0.117333	0.178667	2.70191	0.0412385	0.759803	-3.88548
chr8@bin_3823_w	0.1175	0.274583	3.36274	0.0191563	0.644256	-3.08855
chr12@bin_1040_c	0.1175	0.887917	5.75572	0.00207329	0.644532	-0.774068
chr1@bin_2739_w	0.117767	0.502217	4.21492	0.0078964	0.561387	-2.14423
chr9@bin_3157_c	0.118333	0.359167	2.94667	0.0312781	0.809094	-3.65191
chr10@bin_2737_c	0.118333	0.234167	2.77944	0.0375351	0.749546	-3.78745
chr11@bin_5697_c	0.118333	0.154167	2.71275	0.0415363	0.805417	-3.94811
chr12@bin_2165_c	0.118333	0.4125	6.93596	0.000878377	0.561771	0.0777267
chr19@bin_627_c	0.118333	0.844167	4.75564	0.00486499	0.514482	-1.67518
chr7@bin_363_w	0.1186	0.802133	3.89432	0.0108583	0.606779	-2.52896
chr7@bin_3371_w	0.119167	0.61625	3.14012	0.0246907	0.70298	-3.40204
chr4@bin_4123_w	0.119333	0.681667	4.31414	0.00718314	0.581353	-2.05502
chr14@bin_1698_w	0.1194	0.759167	3.17491	0.0239685	0.763081	-3.34568
chr8@bin_1228_w	0.119967	0.596683	12.3335	5.08722e-05	0.288224	2.49553
chr1@bin_2717_w	0.12	0.816667	4.33043	0.00705692	0.561387	-2.02676
chr1@bin_4071_c	0.12	0.94	3.82486	0.0117102	0.604702	-2.55761
chr1@bin_4624_w	0.12	0.163333	2.63983	0.0448011	0.771571	-3.96602
chr2@bin_5984_w	0.12	0.596667	4.5758	0.00565541	0.53318	-1.81617
chr2@bin_5329_c	0.12	0.8	3.93237	0.010575	0.618395	-2.47607
chr2@bin_3099_w	0.12	0.13	3.26766	0.0215537	0.696882	-3.23074
chr2@bin_4210_w	0.12	0.233333	2.57324	0.0488222	0.745151	-4.09118
chr4@bin_4198_c	0.12	0.3439	4.96944	0.00392661	0.495785	-1.42617
chr4@bin_1646_w	0.12	0.833333	2.67383	0.0430178	0.796194	-3.9387
chr6@bin_2960_w	0.12	0.433333	2.89258	0.0329982	0.774119	-3.69853
chr6@bin_1048_w	0.12	0.88	2.82255	0.0358709	0.779831	-3.78641
chr7@bin_25_c	0.12	0.616667	2.89445	0.0328959	0.748055	-3.70552
chr7@bin_1712_c	0.12	0.553333	2.69814	0.0416466	0.785952	-3.95366
chr8@bin_3384_c	0.12	0.43	6.11574	0.00152491	0.423542	-0.468254
chr8@bin_1483_w	0.12	0.846667	3.34253	0.0195933	0.64522	-3.11233
chr8@bin_3292_c	0.12	0.726667	3.13666	0.0247453	0.699005	-3.35828
chr9@bin_1010_c	0.12	0.846667	4.0703	0.0092575	0.691504	-2.35637
chr10@bin_4098_w	0.12	0.526667	3.08634	0.0260932	0.697673	-3.40688
chr10@bin_2552_w	0.12	0.698333	2.704	0.0411333	0.759803	-3.88283
chr11@bin_601_c	0.12	0.0766667	11.4416	8.18641e-05	0.197088	2.20587
chr11@bin_6063_c	0.12	0.913333	4.33151	0.00725629	0.618449	-2.09325
chr12@bin_527_c	0.12	0.761667	5.07659	0.00362442	0.644532	-1.34607
chr13@bin_1298_w	0.12	0.67	4.46781	0.00614765	0.496594	-1.8948
chr13@bin_3175_c	0.12	0.75	3.93798	0.0103632	0.632536	-2.44273
chr14@bin_1173_w	0.12	0.89	4.82634	0.00451296	0.677541	-1.58135
chr14@bin_1419_w	0.12	0.91	3.06576	0.0271626	0.764042	-3.47803
chr15@bin_1235_w	0.12	0.576667	5.20114	0.00320704	0.538549	-1.21849
chr15@bin_893_c	0.12	0.91	2.85899	0.0343935	0.814935	-3.70553
chr16@bin_1015_w	0.12	0.763333	4.96806	0.00405669	0.598151	-1.47888
chr17@bin_1450_w	0.12	0.163333	4.76419	0.00470542	0.44259	-1.62338
chr18@bin_1915_c	0.12	0.888333	12.5265	4.90862e-05	0.0689661	2.50145
chr19@bin_2352_c	0.12	0.303333	5.65151	0.00228313	0.514482	-0.886095
chrX@bin_356_c	0.12	0.646667	3.9658	0.00721653	0.78893	-1.99567
chr12@bin_551_c	0.1204	0.3466	4.14448	0.00856634	0.647364	-2.2453
chr2@bin_1732_c	0.120667	0.798333	2.67863	0.0429248	0.741407	-3.95676
chr4@bin_2530_w	0.1211	0.836117	3.04142	0.0277749	0.724267	-3.48023
chr4@bin_6336_w	0.1211	0.69725	2.62006	0.0459376	0.801868	-4.00711
chr5@bin_3599_w	0.1211	0.832783	2.69525	0.0418455	0.859341	-3.91074
chrX@bin_2216_c	0.1211	0.331117	3.40331	0.0141581	0.807883	-2.62357
chr2@bin_3129_c	0.121133	0.695	3.5023	0.0166313	0.663887	-2.95597
chr5@bin_5551_c	0.121133	0.720567	3.16157	0.0241313	0.799085	-3.33315
chr9@bin_3549_w	0.121133	0.8639	2.8823	0.0337394	0.813382	-3.73203
chr10@bin_4900_w	0.121133	0.8361	3.20982	0.0226351	0.695299	-3.25754
chr18@bin_30_w	0.121133	0.810567	5.19483	0.003251	0.409553	-1.22478
chr2@bin_1447_w	0.121333	0.594	3.12891	0.0252284	0.697109	-3.39734
chr1@bin_5210_w	0.121667	0.769167	4.84967	0.0043561	0.561387	-1.52584
chr4@bin_381_c	0.121667	0.865833	5.12805	0.00342109	0.495785	-1.2841
chr1@bin_4578_c	0.121667	0.799167	5.24302	0.00309375	0.561387	-1.17466
chr1@bin_657_w	0.121667	0.660833	2.68212	0.0425485	0.771571	-3.91237
chr6@bin_701_c	0.121667	0.4275	4.5681	0.00561732	0.651357	-1.82353
chr10@bin_1458_c	0.121667	0.744167	6.51147	0.0011233	0.488689	-0.168673
chr11@bin_3682_w	0.121667	0.810833	2.6223	0.0463387	0.821532	-4.06306
chr15@bin_2588_w	0.121667	0.6625	4.63798	0.00528162	0.546027	-1.73453
chr5@bin_4062_w	0.1222	0.521667	2.95521	0.0306613	0.818606	-3.58513
chr6@bin_1958_w	0.1222	0.395567	3.04312	0.0276484	0.752628	-3.51182
chr7@bin_910_c	0.1222	0.683333	4.11743	0.0086603	0.585499	-2.28879
chr11@bin_6188_w	0.1222	0.816667	3.81487	0.0121182	0.674093	-2.63892
chr5@bin_4571_w	0.122267	0.494433	2.57527	0.0484649	0.866364	-4.0636
chr2@bin_5831_c	0.1225	0.67125	3.80667	0.0120356	0.641814	-2.6131
chr4@bin_4792_w	0.1233	0.601683	2.81784	0.0361546	0.760872	-3.75706
chr1@bin_1108_w	0.123333	0.708333	4.81772	0.00448271	0.561387	-1.55542
chr1@bin_1048_w	0.123333	0.891667	4.55459	0.00570447	0.561387	-1.80513
chr1@bin_818_c	0.123333	0.878333	3.31701	0.020258	0.676402	-3.13453
chr2@bin_6378_w	0.123333	0.885	9.41266	0.000202738	0.173882	1.42794
chr2@bin_672_c	0.123333	0.841667	2.78773	0.0376323	0.736627	-3.81885
chr4@bin_761_w	0.123333	0.878333	3.96861	0.0101183	0.61283	-2.41506
chr4@bin_5338_c	0.123333	0.715	2.66352	0.0435618	0.797689	-3.9518
chr5@bin_4121_c	0.123333	0.34	7.21703	0.000709681	0.45434	0.27779
chr5@bin_4083_w	0.123333	0.876667	3.12107	0.0252792	0.799085	-3.38211
chr5@bin_2996_c	0.123333	0.906667	2.58564	0.04785	0.866364	-4.05034
chr8@bin_3370_c	0.123333	0.491667	2.72372	0.0403181	0.762349	-3.87014
chr9@bin_1261_c	0.123333	0.71	4.49918	0.00611789	0.691504	-1.91693
chr10@bin_3075_c	0.123333	0.728333	4.08843	0.00881945	0.611241	-2.26674
chr10@bin_264_w	0.123333	0.615	2.92123	0.0316743	0.729323	-3.61006
chr10@bin_530_c	0.123333	0.751667	2.76258	0.038308	0.749546	-3.80871
chr10@bin_4065_c	0.123333	0.59	2.66388	0.0431997	0.76404	-3.9338
chr11@bin_3111_w	0.123333	0.501667	7.30134	0.000711284	0.377096	0.286582
chr11@bin_3845_c	0.123333	0.705	3.89195	0.0111973	0.674093	-2.55467
chr11@bin_2605_c	0.123333	0.591667	3.24724	0.0223155	0.759358	-3.28987
chr12@bin_2702_c	0.123333	0.861667	2.57182	0.0489569	0.723599	-4.0836
chr13@bin_3540_c	0.123333	0.649433	8.16927	0.000388339	0.310866	0.837358
chr15@bin_693_w	0.123333	0.835	2.80384	0.0367361	0.817362	-3.77456
chr15@bin_1300_c	0.123333	0.845	2.6327	0.0452002	0.843472	-3.99103
chr9@bin_967_c	0.123367	0.472783	2.95912	0.0308256	0.807292	-3.63648
chr5@bin_2328_w	0.124	0.784667	6.96218	0.000841126	0.463092	0.115309
chr1@bin_4209_w	0.124433	0.820017	4.80006	0.00455451	0.561387	-1.57183
chr4@bin_1096_w	0.124467	0.645567	2.58765	0.0478019	0.812534	-4.04848
chr10@bin_3157_w	0.124467	0.556667	3.14569	0.0243625	0.695299	-3.33481
chr11@bin_3859_c	0.124467	0.757767	3.23964	0.0225065	0.759358	-3.29895
chr3@bin_4497_w	0.1245	0.79445	5.12259	0.00337802	0.484484	-1.28236
chr11@bin_1813_c	0.125	0.734167	2.722	0.0410764	0.805417	-3.93639
chr12@bin_3964_c	0.125	0.415833	3.14747	0.0247344	0.686479	-3.36672
chr17@bin_1751_c	0.125	0.3175	2.5746	0.0485392	0.815073	-4.08061
chrX@bin_1482_w	0.125	0.8775	2.8436	0.0290232	0.833766	-3.30145
chr8@bin_3979_c	0.125533	0.338333	4.6496	0.00518137	0.476488	-1.71514
chr16@bin_257_w	0.126667	0.836667	2.65071	0.0447495	0.831598	-4.02476
chr17@bin_3883_w	0.126667	0.823333	3.743	0.0127588	0.607837	-2.67277
chr2@bin_779_c	0.126667	0.84	4.46403	0.0062784	0.53318	-1.92589
[truncated: 733 more rows]

## Sheet: DR-ameliorate DMR and DMG
Bin_ID	hyper_/hypo_	gene
chr5@bin_520_w	hyper_methylation
chr5@bin_5059_c	hyper_methylation	Tnrc18
chr18@bin_2121_w	hyper_methylation
chr12@bin_938_c	hyper_methylation
chrX@bin_2216_c	hyper_methylation
chr1@bin_3957_c	hyper_methylation	AK158038
chr15@bin_4083_c	hyper_methylation	Rarg
chr8@bin_655_c	hyper_methylation
chr2@bin_809_c	hyper_methylation
chr8@bin_4195_w	hyper_methylation
chr18@bin_1961_w	hyper_methylation
chrX@bin_715_c	hyper_methylation
chr9@bin_2043_w	hyper_methylation	Clpx
chr4@bin_3900_c	hyper_methylation
chr15@bin_2977_c	hyper_methylation	Celsr1
chr1@bin_489_c	hyper_methylation
chr15@bin_1564_c	hyper_methylation
chr9@bin_398_w	hyper_methylation	Dnm2
chr4@bin_1177_c	hyper_methylation
chr11@bin_2558_c	hyper_methylation
chr4@bin_4888_c	hyper_methylation
chr2@bin_4531_c	hyper_methylation
chr2@bin_2034_w	hyper_methylation
chr19@bin_1752_c	hyper_methylation	Loxl4
chr13@bin_1036_w	hyper_methylation
chr19@bin_180_w	hyper_methylation
chr14@bin_1087_w	hyper_methylation	Grid1
chr18@bin_2192_c	hyper_methylation	Elac1
chr12@bin_3574_w	hyper_methylation	Dync1h1
chr1@bin_455_c	hyper_methylation
chr12@bin_2165_c	hyper_methylation
chr19@bin_360_w	hyper_methylation	Nrxn2
chr4@bin_3411_w	hyper_methylation	Hivep3
chr13@bin_1297_c	hyper_methylation
chr5@bin_1680_c	hyper_methylation
chr13@bin_1074_c	hyper_methylation
chr8@bin_1252_c	hyper_methylation
chr6@bin_3650_c	hyper_methylation
chr11@bin_5803_c	hyper_methylation
chr10@bin_3593_c	hyper_methylation
chr17@bin_1536_c	hyper_methylation	AK048349,Sik1
chr9@bin_2189_c	hyper_methylation
chr11@bin_1035_c	hyper_methylation
chr7@bin_3853_c	hyper_methylation
chr17@bin_3954_c	hyper_methylation
chr6@bin_1048_w	hyper_methylation
chr19@bin_1713_c	hyper_methylation
chr13@bin_1298_w	hyper_methylation
chr12@bin_3412_c	hyper_methylation	Ccdc85c
chr9@bin_1261_c	hyper_methylation
chr2@bin_4455_w	hyper_methylation	Plcb4
chr5@bin_4357_c	hyper_methylation	Auts2
chr10@bin_2046_c	hyper_methylation
chr4@bin_4198_c	hyper_methylation
chr11@bin_244_c	hyper_methylation
chr3@bin_489_w	hyper_methylation
chr1@bin_5669_c	hyper_methylation
chr15@bin_177_c	hyper_methylation
chr19@bin_2542_w	hyper_methylation
chr7@bin_2651_c	hyper_methylation
chr2@bin_5329_c	hyper_methylation
chr3@bin_4378_c	hyper_methylation
chr11@bin_3683_c	hyper_methylation
chr11@bin_4281_c	hyper_methylation
chr17@bin_3710_c	hyper_methylation	Slc8a1
chr14@bin_2282_w	hyper_methylation
chr11@bin_1908_w	hyper_methylation	Wnt9a
chrX@bin_1339_c	hyper_methylation	Maged1
chr5@bin_2488_c	hyper_methylation
chr11@bin_4881_c	hyper_methylation	2018-03-10
chr10@bin_3434_w	hyper_methylation	Anks1b
chr6@bin_2045_c	hyper_methylation
chr4@bin_6203_w	hyper_methylation
chr4@bin_2482_c	hyper_methylation
chr11@bin_4366_c	hyper_methylation
chr15@bin_1976_w	hyper_methylation	AK158547
chr5@bin_4946_w	hyper_methylation
chr5@bin_4062_w	hyper_methylation	Aacs
chr7@bin_2471_w	hyper_methylation
chr5@bin_2642_w	hyper_methylation
chr4@bin_5363_w	hyper_methylation
chr9@bin_2572_w	hyper_methylation
chr6@bin_3295_c	hyper_methylation
chr18@bin_306_c	hyper_methylation	Zfp521
chr13@bin_3921_w	hyper_methylation
chr7@bin_2784_c	hyper_methylation	Crtc3
chr2@bin_3099_w	hyper_methylation
chr6@bin_604_w	hyper_methylation
chr15@bin_2750_c	hyper_methylation	Scube1
chr5@bin_681_w	hyper_methylation	Uvssa
chr15@bin_2083_c	hyper_methylation	Recql4
chr1@bin_4968_c	hyper_methylation
chr15@bin_2971_c	hyper_methylation	Celsr1
chr9@bin_2313_c	hyper_methylation	Tcf12
chr16@bin_684_c	hyper_methylation
chr1@bin_1108_w	hyper_methylation	Tmem182
chr2@bin_3094_c	hyper_methylation
chr17@bin_4068_w	hyper_methylation
chr1@bin_4960_w	hyper_methylation
chr8@bin_154_c	hyper_methylation	Fam155a
chr19@bin_2225_w	hyper_methylation
chr10@bin_4584_c	hyper_methylation
chr8@bin_2109_w	hyper_methylation
chr14@bin_3091_w	hyper_methylation
chr1@bin_1694_c	hyper_methylation
chr3@bin_1211_w	hyper_methylation
chr4@bin_1293_w	hyper_methylation	Col15a1
chr11@bin_2605_c	hyper_methylation
chr2@bin_5984_w	hyper_methylation
chr5@bin_3599_w	hyper_methylation
chr7@bin_4418_c	hyper_methylation
chr12@bin_1044_w	hyper_methylation
chr7@bin_1909_w	hyper_methylation
chr2@bin_5083_c	hyper_methylation	Gss
chr10@bin_3247_c	hyper_methylation
chr4@bin_5291_c	hyper_methylation
chrX@bin_2037_w	hyper_methylation
chr11@bin_1502_w	hyper_methylation	Phykpl
chr2@bin_4681_w	hyper_methylation
chr8@bin_3160_c	hyper_methylation
chr5@bin_4574_c	hyper_methylation
chr5@bin_2834_c	hyper_methylation	Adrbk2
chr5@bin_2996_c	hyper_methylation	Kctd10
chr3@bin_2325_c	hyper_methylation
chr2@bin_4058_c	hyper_methylation	Atp8b4
chr13@bin_3065_c	hyper_methylation
chr12@bin_551_c	hyper_methylation	1700030C10Rik
chr4@bin_6100_c	hyper_methylation	Camta1
chr5@bin_3899_c	hyper_methylation
chr11@bin_6101_w	hyper_methylation
chr10@bin_3177_w	hyper_methylation
chr2@bin_1587_c	hyper_methylation
chr1@bin_2148_w	hyper_methylation
chr4@bin_1932_w	hyper_methylation
chr11@bin_4261_w	hyper_methylation	Thra,AK053029
chr3@bin_3152_w	hyper_methylation
chr14@bin_2269_w	hyper_methylation
chr13@bin_1964_c	hyper_methylation	Trpc7
chr11@bin_4360_c	hyper_methylation
chr18@bin_1800_c	hyper_methylation
chr19@bin_2089_c	hyper_methylation	Arl3
chr2@bin_4915_w	hyper_methylation	Tpx2
chr9@bin_1172_c	hyper_methylation
chr1@bin_3670_c	hyper_methylation	Tmcc2
chr2@bin_2150_c	hyper_methylation
chr9@bin_3957_w	hyper_methylation
chr5@bin_2237_w	hyper_methylation	AK160425
chr18@bin_1562_c	hyper_methylation
chr2@bin_1114_w	hyper_methylation
chr1@bin_4133_w	hyper_methylation
chr2@bin_3830_w	hyper_methylation
chr9@bin_1010_c	hyper_methylation
chr1@bin_2614_c	hyper_methylation
chr2@bin_5080_c	hyper_methylation	Acss2os
chr11@bin_4084_w	hyper_methylation
chr4@bin_6363_w	hyper_methylation
chr17@bin_2257_c	hyper_methylation
chr14@bin_1808_c	hyper_methylation
chr11@bin_5922_c	hyper_methylation
chr8@bin_3979_c	hyper_methylation
chr4@bin_5890_c	hyper_methylation
chr1@bin_3934_c	hyper_methylation	Nav1
chr6@bin_701_c	hyper_methylation
chr12@bin_2530_c	hyper_methylation
chr18@bin_1514_c	hyper_methylation
chr1@bin_4901_w	hyper_methylation
chr11@bin_3682_w	hyper_methylation
chr4@bin_6290_c	hyper_methylation	Ajap1
chr17@bin_2065_w	hyper_methylation
chr6@bin_2496_c	hyper_methylation
chr18@bin_1046_w	hyper_methylation
chr10@bin_535_w	hyper_methylation
chr11@bin_5667_w	hyper_methylation
chr2@bin_3043_w	hyper_methylation
chr6@bin_3865_c	hyper_methylation
chr2@bin_1343_w	hyper_methylation
chr10@bin_1193_w	hyper_methylation
chr9@bin_1376_c	hyper_methylation	Dlat
chr4@bin_3606_w	hyper_methylation
chr7@bin_23_c	hyper_methylation
chr5@bin_2238_w	hyper_methylation
chr8@bin_3599_w	hyper_methylation	Cmip
chr1@bin_66_w	hyper_methylation
chr12@bin_941_c	hyper_methylation
chr6@bin_587_c	hyper_methylation
chr10@bin_3075_c	hyper_methylation
chr2@bin_672_c	hyper_methylation
chr2@bin_6505_c	hyper_methylation
chr11@bin_1799_w	hyper_methylation
chr5@bin_2253_w	hyper_methylation	Tmem150cos
chr19@bin_2351_w	hyper_methylation
chr10@bin_2362_c	hyper_methylation
chr9@bin_3549_w	hyper_methylation	Prss43
chr8@bin_1228_w	hyper_methylation	Sorbs2
chr3@bin_796_w	hyper_methylation
chr1@bin_4704_c	hyper_methylation
chr19@bin_683_c	hyper_methylation	Ms4a7
chr17@bin_2960_w	hyper_methylation
chr4@bin_74_c	hyper_methylation
chr14@bin_2695_w	hyper_methylation	Enox1
chr8@bin_521_c	hyper_methylation
chr5@bin_2520_c	hyper_methylation
chr16@bin_1031_c	hyper_methylation
chr3@bin_796_c	hyper_methylation
chr14@bin_186_w	hyper_methylation	Ptprg
chr13@bin_2197_c	hyper_methylation
chr2@bin_1066_w	hyper_methylation
chr4@bin_2035_c	hyper_methylation	Ptprd
chr19@bin_1058_c	hyper_methylation
chr16@bin_1984_c	hyper_methylation
chr7@bin_1689_w	hyper_methylation
chr17@bin_1751_c	hyper_methylation	Cfb,C2
chr19@bin_2138_w	hyper_methylation	Neurl1a
chr4@bin_414_w	hyper_methylation
chr7@bin_466_w	hyper_methylation
chr3@bin_3727_w	hyper_methylation
chr5@bin_4083_w	hyper_methylation	Tmem132b
chr12@bin_933_w	hyper_methylation	Atxn7l1
chr18@bin_2770_c	hyper_methylation
chr1@bin_3668_w	hyper_methylation
chr11@bin_560_c	hyper_methylation
chr1@bin_2717_w	hyper_methylation	Asb1
chr5@bin_3179_w	hyper_methylation
chr2@bin_6576_c	hyper_methylation
chr13@bin_137_c	hyper_methylation
chr18@bin_1006_w	hyper_methylation	Pcdhgc3,Pcdhgc4,Pcdhgc5,Gm38666,Gm38667,Pcdhga3,Pcdhga8,Pcdhga9,Pcdhga2,Pcdhga1,Pcdhga6,Pcdhga7,Pcdhga4,Pcdhga5,Pcdhgb2,Pcdhgb1,Pcdhgb7,Pcdhgb6,Pcdhgb4,Pcdhgb8,Pcdhga10,Pcdhga12,Pcdhgb5,Pcdhga11,Gm37013
chr1@bin_2739_w	hyper_methylation
chr1@bin_4691_w	hyper_methylation
chr10@bin_195_w	hyper_methylation
chr6@bin_1451_c	hyper_methylation
chr4@bin_6195_w	hyper_methylation
chr1@bin_5952_w	hyper_methylation	AK142161
chr14@bin_1698_w	hyper_methylation	Pabpn1
chr4@bin_5189_c	hyper_methylation
chr11@bin_6188_w	hyper_methylation
chr13@bin_2999_c	hyper_methylation	Msh3
chr10@bin_3034_c	hyper_methylation
chr3@bin_1403_w	hyper_methylation
chr4@bin_2916_w	hyper_methylation
chr7@bin_4626_c	hyper_methylation
chr1@bin_657_w	hyper_methylation	Khdrbs2
chr10@bin_1237_w	hyper_methylation	Prep
chr10@bin_3470_w	hyper_methylation
chr3@bin_958_c	hyper_methylation
chr4@bin_4835_c	hyper_methylation	Ephb2
chr2@bin_5279_w	hyper_methylation	Ctnnbl1
chr18@bin_2322_c	hyper_methylation	Ctif
chr9@bin_1616_w	hyper_methylation
chr1@bin_5188_c	hyper_methylation
chr13@bin_3967_c	hyper_methylation
chr12@bin_3964_c	hyper_methylation
chr12@bin_936_w	hyper_methylation	Atxn7l1
chr15@bin_3669_c	hyper_methylation
chr1@bin_842_w	hyper_methylation	Fer1l5
chr2@bin_1506_c	hyper_methylation
chr5@bin_4345_c	hyper_methylation	Auts2
chr4@bin_6021_c	hyper_methylation
chr2@bin_6310_c	hyper_methylation
chr10@bin_3798_w	hyper_methylation	Kitl
chr5@bin_3610_c	hyper_methylation	Dtx1
chr5@bin_2104_c	hyper_methylation
chr7@bin_111_c	hyper_methylation	Zfp579
chr5@bin_999_c	hyper_methylation
chr2@bin_6817_c	hyper_methylation
chr18@bin_2145_w	hyper_methylation
chr16@bin_424_c	hyper_methylation
chr4@bin_3834_w	hyper_methylation	AU040320
chr10@bin_4208_c	hyper_methylation
chr2@bin_3997_w	hyper_methylation
chr2@bin_5987_c	hyper_methylation	Spata2
chr4@bin_636_c	hyper_methylation
chr3@bin_2673_c	hyper_methylation	Cd160
chr6@bin_3090_c	hyper_methylation
chr1@bin_4404_c	hyper_methylation
chr11@bin_2365_c	hyper_methylation
chr17@bin_2492_w	hyper_methylation
chr6@bin_2960_w	hyper_methylation
chr5@bin_4920_c	hyper_methylation
chr13@bin_4007_c	hyper_methylation
chr3@bin_1865_w	hyper_methylation
chr2@bin_1379_c	hyper_methylation
chr10@bin_1503_c	hyper_methylation	Edar
chr8@bin_2685_c	hyper_methylation
chr6@bin_2925_w	hyper_methylation	Kdm5a
chr18@bin_1524_c	hyper_methylation
chr4@bin_5972_c	hyper_methylation	Car6
chr4@bin_3528_c	hyper_methylation
chr2@bin_6835_w	hyper_methylation
chr1@bin_942_c	hyper_methylation	Tsga10
chr8@bin_4059_c	hyper_methylation
chr11@bin_5285_w	hyper_methylation
chr13@bin_3560_c	hyper_methylation
chr10@bin_4289_w	hyper_methylation
chr7@bin_4790_w	hyper_methylation
chr16@bin_2212_w	hyper_methylation
chrX@bin_1200_c	hyper_methylation
chr1@bin_711_w	hyper_methylation	Dst
chr2@bin_1732_c	hyper_methylation
chr8@bin_3706_w	hyper_methylation	Cdh13
chr1@bin_5184_c	hyper_methylation	Atp1a2
chr3@bin_1820_c	hyper_methylation	Platr10
chr11@bin_111_c	hyper_methylation
chr2@bin_4859_c	hyper_methylation
chr4@bin_761_w	hyper_methylation
chr19@bin_853_c	hyper_methylation	Rorb
chr1@bin_2690_w	hyper_methylation	Scly,Espnl
chr11@bin_3649_w	hyper_methylation
chr1@bin_4624_w	hyper_methylation
chr6@bin_2720_c	hyper_methylation	Raf1
chr10@bin_131_c	hyper_methylation	Cnksr3
chr7@bin_3760_w	hyper_methylation
chr17@bin_983_c	hyper_methylation
chr5@bin_3625_w	hyper_methylation
chr7@bin_2142_c	hyper_methylation	Gabrg3
chr13@bin_2031_w	hyper_methylation
chr13@bin_1608_w	hyper_methylation
chr16@bin_2827_w	hyper_methylation
chr4@bin_3460_w	hyper_methylation	Rims3
chr6@bin_2946_c	hyper_methylation
chr5@bin_4121_c	hyper_methylation
chr9@bin_1598_c	hyper_methylation
chr16@bin_2624_c	hyper_methylation
chr7@bin_2705_c	hyper_methylation
chr2@bin_779_c	hyper_methylation
chr13@bin_3911_c	hyper_methylation
chr10@bin_530_c	hyper_methylation	Myb
chr2@bin_3680_w	hyper_methylation
chr8@bin_3384_c	hyper_methylation	Adat1
chr5@bin_5551_c	hyper_methylation	Zar1l
chr3@bin_3525_w	hyper_methylation	Bcar3
chr7@bin_2304_w	hyper_methylation	Pcsk6
chr1@bin_4954_w	hyper_methylation
chr7@bin_4983_c	hyper_methylation
chr11@bin_6063_c	hyper_methylation
chr7@bin_2705_w	hyper_methylation
chr7@bin_3786_c	hyper_methylation
chr6@bin_2615_w	hyper_methylation	Creld1
chr19@bin_2397_c	hyper_methylation
chr5@bin_2374_c	hyper_methylation	4930429D17Rik
chr5@bin_2700_c	hyper_methylation
chr16@bin_2887_c	hyper_methylation	Kcnj6
chr1@bin_1027_w	hyper_methylation	Npas2
chr1@bin_2506_w	hyper_methylation
chr5@bin_4276_w	hyper_methylation
chr4@bin_2591_c	hyper_methylation
chr1@bin_719_w	hyper_methylation	Dst
chr5@bin_1979_c	hyper_methylation
chr13@bin_1589_w	hyper_methylation
chr5@bin_1382_w	hyper_methylation	Klhl5
chr7@bin_2038_w	hyper_methylation
chr18@bin_2511_c	hyper_methylation	Slc14a1
chr19@bin_2420_w	hyper_methylation	Vti1a
chr8@bin_1207_c	hyper_methylation
chr9@bin_1512_w	hyper_methylation
chr19@bin_646_c	hyper_methylation
chr16@bin_257_w	hyper_methylation
chr7@bin_1344_w	hyper_methylation
chr19@bin_2352_c	hyper_methylation	AK019949,Mirt1
chr11@bin_279_w	hyper_methylation
chr9@bin_1874_w	hyper_methylation	Anp32a
chr1@bin_791_w	hyper_methylation
chr11@bin_1742_c	hyper_methylation
chr11@bin_3892_c	hyper_methylation	Ngfr
chr4@bin_6449_c	hyper_methylation	Prdm16
chr7@bin_3021_w	hyper_methylation
chr18@bin_1375_c	hyper_methylation
chr16@bin_2254_c	hyper_methylation
chr4@bin_4476_c	hyper_methylation
chr15@bin_1817_c	hyper_methylation
chr15@bin_885_w	hyper_methylation
chr4@bin_1041_w	hyper_methylation
chr15@bin_3842_c	hyper_methylation	Lima1
chr13@bin_3104_c	hyper_methylation
chr14@bin_2831_w	hyper_methylation
chr2@bin_1385_c	hyper_methylation
chr5@bin_1449_c	hyper_methylation	Apbb2
chr4@bin_6276_c	hyper_methylation
chr9@bin_684_c	hyper_methylation
chr11@bin_4806_c	hyper_methylation
chr12@bin_2680_w	hyper_methylation	Adck1
chr2@bin_4166_c	hyper_methylation	Gm14005
chr15@bin_4004_c	hyper_methylation	Krt80
chr3@bin_1272_w	hyper_methylation
chr6@bin_2335_w	hyper_methylation
chr2@bin_6234_c	hyper_methylation
chr10@bin_348_c	hyper_methylation
chr11@bin_5325_w	hyper_methylation
chr8@bin_3875_c	hyper_methylation
chr3@bin_2993_c	hyper_methylation
chr8@bin_4016_w	hyper_methylation
chr17@bin_3159_w	hyper_methylation
chr11@bin_975_w	hyper_methylation
chr1@bin_210_w	hyper_methylation
chr8@bin_4097_c	hyper_methylation
chrX@bin_1856_c	hyper_methylation
chr1@bin_3691_w	hyper_methylation
chr1@bin_2125_c	hyper_methylation
chr4@bin_5309_c	hyper_methylation	Arhgef10l
chr13@bin_1336_w	hyper_methylation
chr3@bin_973_c	hyper_methylation
chr10@bin_3157_w	hyper_methylation	Chst11
chr5@bin_652_c	hyper_methylation	Pisd
chr4@bin_1217_c	hyper_methylation	Trim14
chr11@bin_4539_w	hyper_methylation	Nbr1
chr15@bin_1667_w	hyper_methylation
chr18@bin_1519_c	hyper_methylation
chr1@bin_3739_w	hyper_methylation	Ppp1r15b
chr7@bin_1233_c	hyper_methylation
chr13@bin_1816_c	hyper_methylation	Lman2
chr1@bin_5912_c	hyper_methylation
chr2@bin_2970_c	hyper_methylation	F2
chr11@bin_533_c	hyper_methylation
chr2@bin_2124_c	hyper_methylation
chr17@bin_3800_w	hyper_methylation
chr17@bin_183_w	hyper_methylation
chr16@bin_2947_w	hyper_methylation
chr8@bin_2491_w	hyper_methylation	Nkd1
chr9@bin_597_w	hyper_methylation
chr4@bin_5031_w	hyper_methylation	Kif17
chr14@bin_2147_w	hyper_methylation
chr15@bin_1333_c	hyper_methylation	Enpp2
chr3@bin_1794_w	hyper_methylation	Gm20754
chr4@bin_4388_c	hyper_methylation
chr3@bin_1402_w	hyper_methylation
chr7@bin_3904_c	hyper_methylation
chr3@bin_2038_c	hyper_methylation	Arfip1
chr13@bin_1064_w	hyper_methylation	Hivep1
chr19@bin_1096_c	hyper_methylation
chr6@bin_1076_w	hyper_methylation	C530044C16Rik
chr4@bin_5031_c	hyper_methylation
chr13@bin_1003_w	hyper_methylation	Gcnt2
chr3@bin_2177_w	hyper_methylation
chr5@bin_618_c	hyper_methylation
chr13@bin_282_c	hyper_methylation
chr11@bin_4915_c	hyper_methylation	Strada
chr3@bin_2243_w	hyper_methylation
chr13@bin_2770_w	hyper_methylation
chr5@bin_3561_c	hyper_methylation
chr9@bin_3872_w	hyper_methylation	Ctdspl
chrX@bin_2242_c	hyper_methylation	Mageh1
chr14@bin_2139_w	hyper_methylation
chr2@bin_6216_w	hyper_methylation
chr1@bin_3748_c	hyper_methylation
chr10@bin_554_c	hyper_methylation
chr1@bin_2679_c	hyper_methylation
chr5@bin_5004_w	hyper_methylation
chr2@bin_253_c	hyper_methylation
chr17@bin_89_w	hyper_methylation	Snx9
chr3@bin_2917_c	hyper_methylation
chr18@bin_411_w	hyper_methylation
chr2@bin_6144_c	hyper_methylation
chr7@bin_2361_w	hyper_methylation	Adamts17
chr1@bin_4142_c	hyper_methylation	Gm4788
chr8@bin_3292_c	hyper_methylation
chr5@bin_2354_c	hyper_methylation
chr7@bin_363_w	hyper_methylation
chr1@bin_1663_w	hyper_methylation	Ino80dos
chr11@bin_1813_c	hyper_methylation
chr10@bin_1677_c	hyper_methylation	Pldi
chr5@bin_492_w	hyper_methylation
chr15@bin_1439_c	hyper_methylation
chr1@bin_5434_c	hyper_methylation	Adck3
chr5@bin_3923_c	hyper_methylation	Pitpnm2
chr9@bin_896_c	hyper_methylation	Ubash3b
chr7@bin_4706_c	hyper_methylation
chr1@bin_2798_c	hyper_methylation	Kif1a
chr12@bin_3193_c	hyper_methylation
chr3@bin_1580_w	hyper_methylation
chr6@bin_3457_c	hyper_methylation
chr9@bin_1161_w	hyper_methylation	Dscaml1
chr15@bin_1835_c	hyper_methylation
chr3@bin_1192_c	hyper_methylation
chr5@bin_2541_c	hyper_methylation	Tgfbr3
chr2@bin_2356_c	hyper_methylation	AK079188
chr2@bin_6747_w	hyper_methylation	Cdh4
chr16@bin_2666_c	hyper_methylation
chr2@bin_5799_c	hyper_methylation	Zmynd8
chr11@bin_999_c	hyper_methylation	Dock2
chr2@bin_6414_c	hyper_methylation
chr5@bin_5180_w	hyper_methylation	Bri3
chr1@bin_1215_w	hyper_methylation	Col3a1
chr10@bin_1859_c	hyper_methylation	Tet1
chr11@bin_1168_w	hyper_methylation	Gabrb2
chr11@bin_3223_w	hyper_methylation
chr4@bin_6413_c	hyper_methylation	Prdm16
chr14@bin_460_w	hyper_methylation	Adk
chr17@bin_3326_c	hyper_methylation
chr9@bin_1542_c	hyper_methylation
chr17@bin_3116_w	hyper_methylation
chr4@bin_1633_w	hyper_methylation	Musk
chr10@bin_2758_w	hyper_methylation
chr17@bin_2469_c	hyper_methylation
chr9@bin_1108_w	hyper_methylation
chr15@bin_1344_c	hyper_methylation
chr1@bin_5313_w	hyper_methylation	Sdccag8
chr3@bin_3361_c	hyper_methylation	Mfsd14a
chr19@bin_2102_c	hyper_methylation	Cyp17a1
chr11@bin_3221_c	hyper_methylation	Asic2
chr10@bin_3131_c	hyper_methylation
chr3@bin_1863_w	hyper_methylation
chr2@bin_769_c	hyper_methylation
chr10@bin_4065_c	hyper_methylation
chr10@bin_2239_c	hyper_methylation	Bicc1
chr4@bin_3756_c	hyper_methylation
chr12@bin_281_w	hyper_methylation
chr10@bin_2752_c	hyper_methylation
chr13@bin_3571_w	hyper_methylation
chr5@bin_2054_c	hyper_methylation	Ppef2
chr19@bin_2550_w	hyper_methylation
chr5@bin_5527_w	hyper_methylation	Fry
chrX@bin_145_w	hyper_methylation
chr12@bin_3073_c	hyper_methylation
chr2@bin_3101_w	hyper_methylation
chr1@bin_1048_w	hyper_methylation
chr3@bin_1079_w	hyper_methylation
chr11@bin_1876_c	hyper_methylation	Obscn
chr18@bin_2415_c	hyper_methylation
chr1@bin_1550_c	hyper_methylation
chr18@bin_1915_c	hyper_methylation
chr19@bin_2642_w	hyper_methylation
chr18@bin_2329_w	hyper_methylation	Gm10532
chr10@bin_2737_c	hyper_methylation
chr14@bin_1213_c	hyper_methylation
chr15@bin_587_w	hyper_methylation	Fam134b
chr19@bin_1923_c	hyper_methylation
chr10@bin_3505_w	hyper_methylation	Pctk2,Cdk17
chr13@bin_204_w	hyper_methylation
chr17@bin_3892_w	hyper_methylation
chr1@bin_2774_w	hyper_methylation
chr11@bin_5071_c	hyper_methylation
chr11@bin_5697_c	hyper_methylation	Mxra7
chr9@bin_522_w	hyper_methylation
chr17@bin_1918_w	hyper_methylation
chrX@bin_669_w	hyper_methylation
chr8@bin_4056_w	hyper_methylation
chr8@bin_4327_c	hyper_methylation
chr4@bin_1126_c	hyper_methylation
chr4@bin_2312_w	hyper_methylation	Gm12610
chr2@bin_1347_c	hyper_methylation	AK162388
chr7@bin_2006_w	hyper_methylation	Nav2
chr9@bin_1576_w	hyper_methylation
chr17@bin_3610_w	hyper_methylation
chr1@bin_2806_c	hyper_methylation
chr17@bin_2400_w	hyper_methylation	Trerf1
chrX@bin_356_c	hyper_methylation
chr18@bin_2707_c	hyper_methylation
chr6@bin_3178_w	hyper_methylation
chr15@bin_3989_w	hyper_methylation	Grasp
chr1@bin_3384_c	hyper_methylation
chr19@bin_1193_w	hyper_methylation
chr17@bin_2400_c	hyper_methylation
chr11@bin_2900_c	hyper_methylation	Abr
chr1@bin_540_c	hyper_methylation	Adgrb3
chr2@bin_4567_w	hyper_methylation
chr1@bin_4578_c	hyper_methylation
chr2@bin_3362_c	hyper_methylation
chr4@bin_5338_c	hyper_methylation	Padi1
chr12@bin_3306_c	hyper_methylation	1700121N20Rik
chr2@bin_6845_c	hyper_methylation	AK045142
chr6@bin_2151_w	hyper_methylation
chr4@bin_5017_c	hyper_methylation
chr16@bin_2844_w	hyper_methylation	Sim2
chr2@bin_5456_c	hyper_methylation	Ptprt
chr12@bin_1040_c	hyper_methylation
chr5@bin_3444_w	hyper_methylation
chr10@bin_1224_w	hyper_methylation
chr8@bin_1620_c	hyper_methylation
chr19@bin_963_c	hyper_methylation
chr11@bin_5361_w	hyper_methylation
chr5@bin_652_w	hyper_methylation
chr15@bin_3845_c	hyper_methylation	Lima1
chr14@bin_1641_w	hyper_methylation
chr17@bin_1564_c	hyper_methylation
chr10@bin_264_w	hyper_methylation
chr19@bin_1760_c	hyper_methylation
chr2@bin_2082_w	hyper_methylation
chr6@bin_2155_w	hyper_methylation
chr8@bin_3347_w	hyper_methylation
chr7@bin_169_w	hyper_methylation	Usp29
chr18@bin_1332_c	hyper_methylation
chr10@bin_2342_w	hyper_methylation
chr13@bin_3636_c	hyper_methylation
chr2@bin_6423_w	hyper_methylation
chr11@bin_5950_w	hyper_methylation
chr12@bin_2702_c	hyper_methylation
chr16@bin_2696_w	hyper_methylation
chr19@bin_71_w	hyper_methylation	Pitpnm1
chr13@bin_2345_w	hyper_methylation
chr8@bin_2304_c	hyper_methylation	Nfix
chr1@bin_1704_c	hyper_methylation
chr2@bin_2123_w	hyper_methylation
chr15@bin_2879_w	hyper_methylation
chr15@bin_556_w	hyper_methylation	Myo10
chr5@bin_4347_w	hyper_methylation
chr5@bin_3442_w	hyper_methylation
chr17@bin_171_w	hyper_methylation
chr18@bin_1290_c	hyper_methylation
chr13@bin_1518_w	hyper_methylation
chr10@bin_1201_c	hyper_methylation
chr4@bin_1770_w	hyper_methylation
chr18@bin_2597_w	hyper_methylation
chr17@bin_3883_w	hyper_methylation	Camkmt
chr2@bin_2533_c	hyper_methylation
chr4@bin_4527_c	hyper_methylation
chr4@bin_2135_w	hyper_methylation
chr6@bin_2112_c	hyper_methylation	Iqsec1
chr1@bin_5122_w	hyper_methylation	Pfdn2
chr6@bin_2417_c	hyper_methylation
chr15@bin_3439_w	hyper_methylation
chr2@bin_5300_w	hyper_methylation
chr1@bin_1625_w	hyper_methylation
chr7@bin_704_w	hyper_methylation
chr8@bin_2202_w	hyper_methylation
chr6@bin_3156_w	hyper_methylation	Vamp1
chr1@bin_2570_w	hyper_methylation	Agap1
chr2@bin_5293_c	hyper_methylation
chr16@bin_1015_w	hyper_methylation
chrX@bin_2098_w	hyper_methylation
chr4@bin_4039_c	hyper_methylation	C77080
chr4@bin_5277_w	hyper_methylation
chr9@bin_3157_c	hyper_methylation	Tmem108
chr12@bin_3038_w	hyper_methylation
chr12@bin_3152_w	hyper_methylation
chr5@bin_2221_c	hyper_methylation	Rasgef1b
chr6@bin_897_c	hyper_methylation
chr13@bin_1985_c	hyper_methylation
chr18@bin_1211_c	hyper_methylation
chr11@bin_4560_w	hyper_methylation
chr13@bin_1247_c	hyper_methylation
chr4@bin_3759_c	hyper_methylation
chr9@bin_3076_c	hyper_methylation	Ephb1
chr15@bin_893_c	hyper_methylation
chr8@bin_536_c	hyper_methylation
chr2@bin_1081_c	hyper_methylation
chr13@bin_2965_w	hyper_methylation
chr8@bin_3449_w	hyper_methylation	Wwox
chr8@bin_1149_c	hyper_methylation
chr1@bin_1135_c	hyper_methylation
chr2@bin_6305_w	hyper_methylation
chr17@bin_4031_w	hyper_methylation
chr7@bin_25_c	hyper_methylation
chr15@bin_1841_c	hyper_methylation
chr8@bin_875_c	hyper_methylation
chr4@bin_4365_w	hyper_methylation
chr6@bin_3560_w	hyper_methylation
chr8@bin_1176_w	hyper_methylation
chr14@bin_1173_w	hyper_methylation
chr13@bin_3870_w	hyper_methylation	Arl15
chr14@bin_3455_w	hyper_methylation	Gpc6
chr11@bin_4307_c	hyper_methylation
chr17@bin_1789_c	hyper_methylation
chr18@bin_1684_c	hyper_methylation
chr7@bin_910_c	hyper_methylation	Map3k10
chr15@bin_693_w	hyper_methylation
chr15@bin_2376_w	hyper_methylation
chr5@bin_1637_w	hyper_methylation
chr18@bin_30_w	hyper_methylation
chr1@bin_5126_c	hyper_methylation
chr13@bin_3032_w	hyper_methylation
chr13@bin_3736_w	hyper_methylation
chrX@bin_2010_c	hyper_methylation	Esx1
chr15@bin_2271_w	hyper_methylation	Cdc42ep1
chr11@bin_57_c	hyper_methylation	Osbp2
chr5@bin_3467_w	hyper_methylation
chr4@bin_5062_c	hyper_methylation
chr7@bin_3222_w	hyper_methylation
chr10@bin_4665_w	hyper_methylation	B4galnt1
chr5@bin_444_c	hyper_methylation
chr13@bin_1522_c	hyper_methylation
chr1@bin_818_c	hyper_methylation	Uggt1
chr11@bin_3008_w	hyper_methylation	Flot2
chr1@bin_2378_c	hyper_methylation
chr15@bin_2224_w	hyper_methylation
chr7@bin_2607_c	hyper_methylation
chr3@bin_825_w	hyper_methylation
chr19@bin_1813_c	hyper_methylation	Slc25a28
chr11@bin_3838_c	hyper_methylation	Itga3
chr3@bin_3539_c	hyper_methylation
chr12@bin_71_w	hyper_methylation
chr17@bin_1605_w	hyper_methylation
chr10@bin_4301_w	hyper_methylation
chr4@bin_3657_w	hyper_methylation	Inpp5b
chr10@bin_4303_c	hyper_methylation
chr4@bin_5583_c	hyper_methylation
chr10@bin_4727_c	hyper_methylation	Lrp1
chr14@bin_3670_c	hyper_methylation
chr16@bin_13_w	hyper_methylation
chr11@bin_4201_c	hyper_methylation	1700003D09Rik
chrX@bin_486_w	hyper_methylation
chr3@bin_4512_c	hyper_methylation
chr6@bin_3066_w	hyper_methylation
chr8@bin_517_w	hyper_methylation	Mcph1
chr17@bin_2727_c	hyper_methylation
chr11@bin_3912_c	hyper_methylation	Abi3
chr2@bin_540_w	hyper_methylation
chr2@bin_5013_c	hyper_methylation
chr5@bin_864_w	hyper_methylation
chr1@bin_4071_c	hyper_methylation
chr4@bin_5784_w	hyper_methylation	Exosc10
chr15@bin_3223_w	hyper_methylation
chr3@bin_1817_w	hyper_methylation
chr9@bin_2752_w	hyper_methylation	4930524O08Rik
chr14@bin_504_c	hyper_methylation
chr5@bin_2328_w	hyper_methylation	Cds1
chr11@bin_5290_w	hyper_methylation
chr17@bin_454_w	hyper_methylation
chr7@bin_4139_c	hyper_methylation
chr11@bin_228_c	hyper_methylation	Camk2b
chr10@bin_714_w	hyper_methylation
chr3@bin_2298_c	hyper_methylation	Dcst1
chr4@bin_193_w	hyper_methylation
chr17@bin_425_c	hyper_methylation
chr17@bin_1728_w	hyper_methylation	Tnxb
chr11@bin_2074_w	hyper_methylation
chr8@bin_666_w	hyper_methylation	Zmat4
chr3@bin_3982_w	hyper_methylation
chr1@bin_812_w	hyper_methylation	Hs6st1
chr4@bin_1096_w	hyper_methylation	Grhpr
chr8@bin_1483_w	hyper_methylation
chr7@bin_4422_c	hyper_methylation
chr9@bin_4039_c	hyper_methylation
chr12@bin_1875_w	hyper_methylation
chr4@bin_4847_w	hyper_methylation
chr10@bin_3824_w	hyper_methylation	Mgat4c
chr12@bin_527_c	hyper_methylation
chr11@bin_4877_c	hyper_methylation	2018-03-10
chr1@bin_3885_c	hyper_methylation	Ppp1r12b
chr5@bin_1298_c	hyper_methylation	Arap2
chrX@bin_805_c	hyper_methylation	Gpr101
chr3@bin_3616_w	hyper_methylation	Arsj
chr6@bin_417_w	hyper_methylation	Snd1
chr10@bin_1885_w	hyper_methylation
chr1@bin_3505_c	hyper_methylation
chr12@bin_2203_w	hyper_methylation
chr13@bin_3844_w	hyper_methylation
chr1@bin_4860_c	hyper_methylation
chr16@bin_2679_c	hyper_methylation
chrX@bin_1077_w	hyper_methylation
chr6@bin_3929_c	hyper_methylation
chr4@bin_1343_w	hyper_methylation
chr12@bin_922_c	hyper_methylation
chr3@bin_4107_c	hyper_methylation
chr5@bin_1430_w	hyper_methylation
chr17@bin_1013_w	hyper_methylation	Syngap1
chr2@bin_5460_c	hyper_methylation	Ptprt
chr16@bin_1062_c	hyper_methylation
chr9@bin_213_w	hyper_methylation
chr19@bin_627_c	hyper_methylation
chr8@bin_2279_w	hyper_methylation	Cacna1a
chr5@bin_3749_c	hyper_methylation
chr17@bin_1951_c	hyper_methylation
chr14@bin_2271_c	hyper_methylation
chr2@bin_3673_w	hyper_methylation
chr18@bin_618_w	hyper_methylation
chr1@bin_1054_w	hyper_methylation
chr4@bin_1646_w	hyper_methylation
chr1@bin_4472_c	hyper_methylation	Rgsl1
chr12@bin_1581_w	hyper_methylation
chr12@bin_3579_w	hyper_methylation	Dync1h1
chr16@bin_630_c	hyper_methylation
chr2@bin_3207_c	hyper_methylation
chr9@bin_2086_c	hyper_methylation
chr13@bin_3814_w	hyper_methylation	Dhx29
chr14@bin_3484_w	hyper_methylation	1700044C05Rik
chr14@bin_1092_c	hyper_methylation
chr12@bin_1356_w	hyper_methylation	Npas3
chr11@bin_3111_w	hyper_methylation	Rab11fip4
chr12@bin_3896_w	hyper_methylation
chr15@bin_1300_c	hyper_methylation	AK035950,Ext1
chr17@bin_62_w	hyper_methylation	Arid1b
chr7@bin_3937_w	hyper_methylation	Scnn1g
chr16@bin_1318_c	hyper_methylation
chr13@bin_3175_c	hyper_methylation	Iqgap2
chr2@bin_524_c	hyper_methylation	Cacna1b
chr3@bin_2490_c	hyper_methylation	AK008482
chr5@bin_4253_w	hyper_methylation	Mmp17
chr7@bin_2699_c	hyper_methylation	Plin1
chr6@bin_1858_w	hyper_methylation
chr14@bin_689_c	hyper_methylation
chr10@bin_3044_c	hyper_methylation	4930404N11Rik,AK201601,Fzr1
chr13@bin_3171_w	hyper_methylation
chr3@bin_1568_w	hyper_methylation
chr2@bin_5510_w	hyper_methylation	Sgk2
chr8@bin_2589_c	hyper_methylation
chr4@bin_2274_c	hyper_methylation
chr10@bin_3323_w	hyper_methylation	Ttc41
chr5@bin_4446_w	hyper_methylation
chr2@bin_4523_c	hyper_methylation
chr16@bin_2915_c	hyper_methylation	Erg
chr4@bin_3711_w	hyper_methylation
chr10@bin_2552_w	hyper_methylation
chr3@bin_524_w	hyper_methylation
chr3@bin_2161_c	hyper_methylation	Bcan
chr5@bin_3711_c	hyper_methylation	Cux2
chr13@bin_2136_w	hyper_methylation
chr6@bin_162_c	hyper_methylation
chr2@bin_6446_w	hyper_methylation
chr10@bin_2327_c	hyper_methylation
chr6@bin_1811_w	hyper_methylation	Ankrd53
chr7@bin_3371_w	hyper_methylation
chr2@bin_2393_w	hyper_methylation
chr11@bin_5440_c	hyper_methylation
chr2@bin_5439_c	hyper_methylation
chr16@bin_1247_c	hyper_methylation	Kalrn
chr11@bin_5333_c	hyper_methylation	Sdk2
chr16@bin_219_c	hyper_methylation
chr18@bin_2751_w	hyper_methylation	Zfp516
chr16@bin_225_w	hyper_methylation
chr14@bin_2588_c	hyper_methylation
chr10@bin_2327_w	hyper_methylation
chr17@bin_129_c	hyper_methylation	Ezr
chr12@bin_815_w	hyper_methylation
chr8@bin_3632_c	hyper_methylation
chr4@bin_6241_w	hyper_methylation
chr16@bin_1183_c	hyper_methylation
chr5@bin_5286_c	hyper_methylation
chr13@bin_1340_w	hyper_methylation
chr9@bin_651_c	hyper_methylation
chrX@bin_790_c	hyper_methylation
chr10@bin_4475_w	hyper_methylation
chrX@bin_2115_c	hyper_methylation
chr15@bin_287_c	hyper_methylation
chr11@bin_2437_w	hyper_methylation
chr19@bin_1509_c	hyper_methylation
chr17@bin_1393_c	hyper_methylation	Mdga1
chrX@bin_2093_c	hyper_methylation
chr10@bin_2423_w	hyper_methylation
chr11@bin_3366_c	hyper_methylation
chr12@bin_1212_w	hyper_methylation
chrX@bin_1482_w	hyper_methylation
chr16@bin_1069_c	hyper_methylation
chr17@bin_2568_c	hyper_methylation
chr6@bin_1282_w	hyper_methylation
chr10@bin_3425_c	hyper_methylation
chr14@bin_3055_c	hyper_methylation	Klhl1
chr5@bin_561_w	hyper_methylation	Agbl5
chr11@bin_6042_c	hyper_methylation
chrX@bin_2461_c	hyper_methylation
chr7@bin_1710_c	hyper_methylation	Ptov1
chr15@bin_2397_w	hyper_methylation
chr2@bin_5885_w	hyper_methylation
chr11@bin_3205_w	hyper_methylation
chr11@bin_5059_w	hyper_methylation	Cep112
chr10@bin_2572_w	hyper_methylation	Itgb2
chr4@bin_1349_w	hyper_methylation
chr15@bin_3261_c	hyper_methylation
chr7@bin_1712_c	hyper_methylation
chr11@bin_4208_c	hyper_methylation
chr7@bin_991_c	hyper_methylation
chrX@bin_2339_c	hyper_methylation
chr15@bin_624_w	hyper_methylation
chr7@bin_1086_w	hyper_methylation
chr11@bin_3546_c	hyper_methylation
chrX@bin_689_c	hyper_methylation
chr17@bin_3964_c	hyper_methylation
chr13@bin_3446_w	hyper_methylation	4933416M06Rik
chr10@bin_4336_w	hyper_methylation	Grip1
chr4@bin_4792_w	hyper_methylation	Zfp46
chr8@bin_3370_c	hyper_methylation	Cfdp1
chr17@bin_1864_w	hyper_methylation
chr6@bin_3426_w	hyper_methylation
chr11@bin_4324_w	hyper_methylation
chrX@bin_2504_w	hyper_methylation	Arhgap6
chrX@bin_2506_c	hyper_methylation	Hccs
chr8@bin_3153_w	hyper_methylation
chr7@bin_3494_c	hyper_methylation
chr13@bin_1761_w	hyper_methylation
chr5@bin_2851_c	hyper_methylation	2900026A02Rik
chrX@bin_713_c	hyper_methylation
chr18@bin_323_c	hyper_methylation
chr7@bin_3657_c	hyper_methylation
chr5@bin_159_w	hyper_methylation
chr16@bin_2687_c	hyper_methylation
chr11@bin_601_c	hyper_methylation
chr8@bin_3823_w	hyper_methylation
chr3@bin_2633_c	hyper_methylation
chr9@bin_959_w	hyper_methylation
chr15@bin_1385_w	hyper_methylation
chr14@bin_1853_c	hyper_methylation
chr10@bin_133_w	hyper_methylation
chr6@bin_3023_c	hyper_methylation	Rimklb
chr17@bin_491_c	hyper_methylation
chr2@bin_543_w	hyper_methylation
chr16@bin_2978_w	hyper_methylation
chr2@bin_3175_c	hyper_methylation
chr4@bin_2718_c	hyper_methylation
chr7@bin_965_w	hyper_methylation
chr13@bin_2118_c	hyper_methylation
chr12@bin_3085_w	hyper_methylation
chr6@bin_3465_c	hyper_methylation	AK016696
chr10@bin_2459_w	hyper_methylation	S100b
chr4@bin_1547_w	hyper_methylation
chr7@bin_2834_w	hyper_methylation
chr1@bin_4389_c	hyper_methylation	Rgl1
chr4@bin_4753_c	hyper_methylation	Lypla2
chr4@bin_381_c	hyper_methylation	Atp6v0d2
chr6@bin_1958_w	hyper_methylation
chr12@bin_528_c	hyper_methylation
chr11@bin_3859_c	hyper_methylation
chr10@bin_3836_w	hyper_methylation
chr18@bin_2755_w	hyper_methylation	Zfp516
chr9@bin_544_w	hyper_methylation
chr6@bin_1106_c	hyper_methylation
chrX@bin_1353_w	hyper_methylation
chr17@bin_3042_w	hyper_methylation
chr15@bin_769_c	hyper_methylation
chr11@bin_2664_w	hyper_methylation
chr4@bin_5920_c	hyper_methylation
chr12@bin_2318_c	hyper_methylation
chr8@bin_1794_c	hyper_methylation
chr13@bin_3530_w	hyper_methylation	Sgtb
chr5@bin_578_c	hyper_methylation
chr14@bin_2209_w	hyper_methylation	Nuggc
chr18@bin_2913_w	hyper_methylation
chr2@bin_6822_w	hyper_methylation	Ntsr1
chr4@bin_3111_c	hyper_methylation
chr5@bin_2710_w	hyper_methylation
chrX@bin_345_c	hyper_methylation
chr4@bin_60_w	hyper_methylation
chr18@bin_2522_w	hyper_methylation
chr7@bin_4346_c	hyper_methylation
chr4@bin_3274_c	hyper_methylation	St3gal3
chr11@bin_144_w	hyper_methylation	Thoc5
chr10@bin_4117_c	hyper_methylation
chr13@bin_2093_c	hyper_methylation
chr17@bin_2493_c	hyper_methylation
chr19@bin_599_w	hyper_methylation
chr6@bin_1910_c	hyper_methylation
chr2@bin_4550_c	hyper_methylation
chr4@bin_4954_c	hyper_methylation
chr18@bin_1566_w	hyper_methylation	Megf10
chr17@bin_2050_c	hyper_methylation
chr12@bin_600_w	hyper_methylation
chr13@bin_1234_c	hyper_methylation	Atxn1
chr1@bin_4963_w	hyper_methylation
chr3@bin_2029_w	hyper_methylation
chr19@bin_1166_c	hyper_methylation	Glis3
chr12@bin_298_c	hyper_methylation
chr17@bin_3683_w	hyper_methylation
chr5@bin_5092_w	hyper_methylation
chr2@bin_5009_w	hyper_methylation
chr7@bin_3852_w	hyper_methylation
chr16@bin_2924_w	hyper_methylation
chrX@bin_1250_c	hyper_methylation
chr14@bin_1196_w	hyper_methylation
chr3@bin_2872_w	hyper_methylation
chr17@bin_957_c	hyper_methylation
chr10@bin_4824_c	hyper_methylation	Erbb3
chr9@bin_1564_c	hyper_methylation
chr18@bin_1199_w	hyper_methylation
chr9@bin_3209_w	hyper_methylation
chr3@bin_4487_w	hyper_methylation	Slc44a5
chr10@bin_4098_w	hyper_methylation
chr19@bin_515_c	hyper_methylation
chr17@bin_1450_w	hyper_methylation	Dnah8
chr9@bin_1163_w	hyper_methylation	Dscaml1
chr7@bin_111_w	hyper_methylation
chr15@bin_1628_c	hyper_methylation	Adcy8
chr17@bin_2502_c	hyper_methylation
chr17@bin_953_w	hyper_methylation
chr6@bin_3513_c	hyper_methylation
chrX@bin_2423_c	hyper_methylation	Car5b
chr9@bin_744_c	hyper_methylation	Ddx25
chr1@bin_3937_c	hyper_methylation	Nav1
chr5@bin_2017_c	hyper_methylation
chr9@bin_3616_c	hyper_methylation
chr18@bin_709_w	hyper_methylation
chr10@bin_2620_w	hyper_methylation
chr7@bin_4905_c	hyper_methylation
chr15@bin_1235_w	hyper_methylation
chr6@bin_2930_c	hyper_methylation	Cecr6
chr6@bin_820_c	hyper_methylation	Dennd2a
chr14@bin_2669_w	hyper_methylation
chr12@bin_2060_w	hyper_methylation
chr3@bin_2638_w	hyper_methylation
chr7@bin_4260_c	hyper_methylation
chr6@bin_2932_c	hyper_methylation
chr2@bin_4210_w	hyper_methylation	A730036I17Rik
chr9@bin_1175_w	hyper_methylation	Dscaml1
chr9@bin_3105_c	hyper_methylation
chr4@bin_6539_w	hyper_methylation
chr7@bin_1759_c	hyper_methylation
chr19@bin_495_c	hyper_methylation
chr2@bin_1447_w	hyper_methylation	Dab2ip
chr15@bin_3014_c	hyper_methylation
chr7@bin_2837_w	hyper_methylation
chr18@bin_542_w	hyper_methylation
chr12@bin_2948_c	hyper_methylation	Ttc7b
chr3@bin_4292_w	hyper_methylation
chr3@bin_4167_w	hyper_methylation
chr1@bin_5747_w	hyper_methylation
chr4@bin_3417_w	hyper_methylation	Hivep3
chr11@bin_2164_w	hypo_methylation
chr11@bin_3665_w	hypo_methylation
chr10@bin_359_w	hypo_methylation
chr13@bin_394_w	hypo_methylation	Elmo1
chr17@bin_2418_c	hypo_methylation
chr19@bin_2114_w	hypo_methylation
chr14@bin_2543_c	hypo_methylation
chr7@bin_3360_c	hypo_methylation
chr13@bin_4002_c	hypo_methylation
chr4@bin_3590_w	hypo_methylation
chr2@bin_2293_c	hypo_methylation
chr15@bin_237_w	hypo_methylation
chr1@bin_2004_w	hypo_methylation	Wnt10a
chr6@bin_238_w	hypo_methylation
chr13@bin_2615_w	hypo_methylation
chr17@bin_749_w	hypo_methylation	Bricd5,Pgp
chr15@bin_258_c	hypo_methylation	Tars
chr1@bin_4964_c	hypo_methylation
chr11@bin_3596_c	hypo_methylation	Msi2
chr16@bin_2645_c	hypo_methylation
chr10@bin_3517_w	hypo_methylation
chr7@bin_3360_w	hypo_methylation	Pde2a
chr17@bin_3527_c	hypo_methylation
chr6@bin_2276_c	hypo_methylation
chr9@bin_654_w	hypo_methylation
chr5@bin_1989_w	hypo_methylation
chr1@bin_5504_w	hypo_methylation	Tmem63a
chr10@bin_1957_c	hypo_methylation
chr19@bin_180_c	hypo_methylation
chr8@bin_2334_c	hypo_methylation	Rnaseh2a
chr5@bin_357_w	hypo_methylation	Agap3
chr18@bin_436_c	hypo_methylation	Dsc3
chr15@bin_1463_c	hypo_methylation
chr8@bin_2523_w	hypo_methylation
chr2@bin_5034_c	hypo_methylation
chr3@bin_3940_c	hypo_methylation	Nfkb1
chr2@bin_5315_w	hypo_methylation	Bpi
chr4@bin_3629_w	hypo_methylation
chr1@bin_5732_c	hypo_methylation	Mark1
chr10@bin_2785_w	hypo_methylation	Abca7
chr6@bin_2911_w	hypo_methylation	Ninj2
chr7@bin_173_c	hypo_methylation
chr10@bin_1929_c	hypo_methylation
chr2@bin_4822_w	hypo_methylation
chr4@bin_5000_w	hypo_methylation	Ece1
chr2@bin_581_w	hypo_methylation
chr15@bin_2223_c	hypo_methylation	C1qtnf6
chrX@bin_1064_w	hypo_methylation	Vbp1
chr2@bin_522_w	hypo_methylation
chr11@bin_905_w	hypo_methylation
chr5@bin_2749_c	hypo_methylation
chr2@bin_4542_c	hypo_methylation
chr2@bin_5443_c	hypo_methylation
chr10@bin_3786_c	hypo_methylation
chr8@bin_4354_c	hypo_methylation
chr18@bin_1975_w	hypo_methylation
chr18@bin_720_c	hypo_methylation
chr11@bin_4520_c	hypo_methylation
chr9@bin_1355_w	hypo_methylation
chr10@bin_340_w	hypo_methylation
chr10@bin_656_w	hypo_methylation
chr10@bin_1700_c	hypo_methylation	Adamts14
chr2@bin_3914_w	hypo_methylation
chr4@bin_6269_c	hypo_methylation
chr14@bin_890_w	hypo_methylation	Btd
chr11@bin_3643_c	hypo_methylation
chr10@bin_2916_w	hypo_methylation	Dot1l
chr7@bin_339_w	hypo_methylation
chr16@bin_1152_c	hypo_methylation
chr11@bin_3320_c	hypo_methylation
chr5@bin_1382_c	hypo_methylation
chr4@bin_654_w	hypo_methylation
chr8@bin_968_c	hypo_methylation	B930018H19Rik
chr2@bin_4708_c	hypo_methylation
chr2@bin_5689_w	hypo_methylation
chr8@bin_2092_w	hypo_methylation
chr2@bin_5354_c	hypo_methylation
chr9@bin_978_w	hypo_methylation
chr7@bin_3670_w	hypo_methylation
chr8@bin_3888_w	hypo_methylation	Gse1
chr6@bin_1344_c	hypo_methylation	Nap1l5
chr2@bin_3031_c	hypo_methylation	Mapk8ip1
chr19@bin_2600_w	hypo_methylation	Atrnl1
chr8@bin_2092_c	hypo_methylation	Smad1
chr5@bin_1435_w	hypo_methylation
chr3@bin_1371_w	hypo_methylation
chr4@bin_654_c	hypo_methylation	Ankrd6
chr18@bin_2250_c	hypo_methylation
chr2@bin_6035_w	hypo_methylation
chr2@bin_3507_c	hypo_methylation
chr3@bin_1363_c	hypo_methylation
chr7@bin_4431_w	hypo_methylation
chr11@bin_4095_c	hypo_methylation
chr1@bin_5142_c	hypo_methylation
chr8@bin_393_w	hypo_methylation
chr9@bin_2892_c	hypo_methylation
chr3@bin_151_c	hypo_methylation
chr5@bin_5220_c	hypo_methylation	Gm4871
chrX@bin_2403_w	hypo_methylation
chr8@bin_58_c	hypo_methylation
chr8@bin_4158_w	hypo_methylation	AK040202
chr9@bin_3143_w	hypo_methylation	Topbp1
chr13@bin_4002_w	hypo_methylation	Gm7120
chr3@bin_4444_c	hypo_methylation
chr13@bin_1948_c	hypo_methylation
chr8@bin_4193_c	hypo_methylation	Fanca
chr4@bin_2447_w	hypo_methylation
chr4@bin_5141_w	hypo_methylation	Capzb
chr2@bin_5919_w	hypo_methylation
chr12@bin_1964_w	hypo_methylation
chr1@bin_1905_w	hypo_methylation	AK048274
chr3@bin_2738_c	hypo_methylation
chr12@bin_937_w	hypo_methylation	Atxn7l1
chr2@bin_907_c	hypo_methylation
chr9@bin_2885_w	hypo_methylation
chr19@bin_1768_w	hypo_methylation
chr11@bin_5447_c	hypo_methylation
chr6@bin_1495_w	hypo_methylation
chr3@bin_4392_w	hypo_methylation
chr2@bin_5440_c	hypo_methylation	Chd6
chr4@bin_695_c	hypo_methylation	Pnrc1
chr7@bin_2432_c	hypo_methylation
chr17@bin_2502_w	hypo_methylation
chr1@bin_1880_w	hypo_methylation
chr12@bin_3257_w	hypo_methylation	Ak7
chr10@bin_1052_w	hypo_methylation
chr12@bin_1291_w	hypo_methylation
chr19@bin_438_w	hypo_methylation
chr4@bin_5223_w	hypo_methylation
chr7@bin_1890_w	hypo_methylation	Otog
chr1@bin_1712_c	hypo_methylation	Plekhm3
chr1@bin_2009_w	hypo_methylation
chr13@bin_2213_w	hypo_methylation
chr5@bin_4290_w	hypo_methylation	Kctd7
chr10@bin_1134_w	hypo_methylation	Scml4
chr13@bin_3725_w	hypo_methylation
chr14@bin_3088_w	hypo_methylation
chr7@bin_1355_w	hypo_methylation
chr2@bin_4451_w	hypo_methylation	Plcb4
chr4@bin_1312_c	hypo_methylation
chr15@bin_2280_w	hypo_methylation	Sh3bp1
chr17@bin_46_c	hypo_methylation
chr10@bin_2982_w	hypo_methylation
chr19@bin_1689_c	hypo_methylation
chr1@bin_3730_w	hypo_methylation	Pik3c2b
chr8@bin_824_c	hypo_methylation
chr19@bin_611_w	hypo_methylation
chr17@bin_3662_c	hypo_methylation
chr9@bin_1153_c	hypo_methylation
chr11@bin_1357_w	hypo_methylation	Ifi47,Olfr56
chr5@bin_3452_w	hypo_methylation	1700081H04Rik
chr2@bin_1214_w	hypo_methylation	St6galnac6
chr3@bin_2419_w	hypo_methylation
chr18@bin_2313_c	hypo_methylation
chr5@bin_410_w	hypo_methylation
chr3@bin_2113_w	hypo_methylation	Fcrl5
chr18@bin_1744_w	hypo_methylation
chr12@bin_1457_c	hypo_methylation
chr12@bin_3948_w	hypo_methylation	Ptprn2
chr18@bin_1105_w	hypo_methylation	Arhgap26
chr3@bin_2128_c	hypo_methylation	Lrrc71
chr9@bin_577_w	hypo_methylation	Opcml
chr6@bin_2266_c	hypo_methylation
chr13@bin_3868_w	hypo_methylation	Arl15
chr11@bin_954_w	hypo_methylation
chr19@bin_2440_w	hypo_methylation
chr7@bin_1197_w	hypo_methylation
chr7@bin_1860_c	hypo_methylation
chr18@bin_1691_w	hypo_methylation	Camk2a
chr15@bin_3662_c	hypo_methylation
chr9@bin_2602_w	hypo_methylation
chr6@bin_1999_c	hypo_methylation
chr12@bin_3700_c	hypo_methylation	Ppp1r13b
chr6@bin_2008_c	hypo_methylation
chr7@bin_2446_w	hypo_methylation
chr7@bin_3300_w	hypo_methylation
chr15@bin_3865_c	hypo_methylation
chr1@bin_3142_c	hypo_methylation
chr19@bin_2076_w	hypo_methylation	Sufu
chr9@bin_3382_w	hypo_methylation
chr11@bin_1380_w	hypo_methylation
chr2@bin_6233_c	hypo_methylation
chr2@bin_5860_w	hypo_methylation
chr1@bin_4425_w	hypo_methylation
chr9@bin_2664_c	hypo_methylation	Ube2cbp
chr3@bin_226_w	hypo_methylation
chr19@bin_355_c	hypo_methylation
chr5@bin_1462_w	hypo_methylation	Limch1
chr3@bin_4192_c	hypo_methylation
chr10@bin_1007_c	hypo_methylation
chr8@bin_2914_w	hypo_methylation
chr8@bin_1446_c	hypo_methylation
chr1@bin_593_w	hypo_methylation
chr11@bin_2737_w	hypo_methylation
chr10@bin_2896_w	hypo_methylation	Adat3,Scamp4
chr18@bin_1144_w	hypo_methylation
chr14@bin_1944_c	hypo_methylation	Atp8a2
chrX@bin_199_c	hypo_methylation	Bcor
chr7@bin_1299_c	hypo_methylation
chr3@bin_4422_c	hypo_methylation	Ak5
chr10@bin_2706_c	hypo_methylation	Shc2
chr13@bin_2515_c	hypo_methylation
chr1@bin_591_w	hypo_methylation
chr2@bin_987_w	hypo_methylation
chr10@bin_1362_w	hypo_methylation
chr14@bin_2220_c	hypo_methylation	Scara3
chr6@bin_3510_w	hypo_methylation
chr4@bin_1687_c	hypo_methylation
chr11@bin_4360_w	hypo_methylation
chr13@bin_1845_c	hypo_methylation
chr14@bin_733_w	hypo_methylation	Erc2
chr2@bin_6395_w	hypo_methylation
chr8@bin_3012_w	hypo_methylation	Rltpr
chr5@bin_372_w	hypo_methylation	Chpf2
chr4@bin_4093_c	hypo_methylation
chr13@bin_1223_w	hypo_methylation
chr2@bin_124_c	hypo_methylation
chr17@bin_879_w	hypo_methylation
chr11@bin_4086_c	hypo_methylation
chr17@bin_1355_c	hypo_methylation
chr7@bin_3090_w	hypo_methylation
chr19@bin_2010_w	hypo_methylation
chr5@bin_4122_w	hypo_methylation	Tmem132c
chr12@bin_468_w	hypo_methylation
chr9@bin_3566_c	hypo_methylation
chr2@bin_2991_c	hypo_methylation	Dgkz
chr9@bin_1800_c	hypo_methylation
chr14@bin_1710_w	hypo_methylation
chr19@bin_83_c	hypo_methylation	Carns1
chr3@bin_1163_w	hypo_methylation
chr14@bin_551_c	hypo_methylation	Dlg5
chr10@bin_4218_c	hypo_methylation
chr11@bin_5245_c	hypo_methylation	Slc39a11
chr1@bin_4907_c	hypo_methylation
chr16@bin_1078_c	hypo_methylation
chr10@bin_873_w	hypo_methylation
chr10@bin_4158_w	hypo_methylation
chr11@bin_3474_c	hypo_methylation
chr1@bin_2618_c	hypo_methylation
chr15@bin_296_c	hypo_methylation	Pdzd2
chr17@bin_3623_w	hypo_methylation
chr8@bin_4337_c	hypo_methylation
chr19@bin_1671_c	hypo_methylation
chr7@bin_10_c	hypo_methylation	Mir290b
chr6@bin_2760_w	hypo_methylation	Zfand4
chr2@bin_4646_w	hypo_methylation	Slc24a3
chr11@bin_2528_c	hypo_methylation	Alox12
chr5@bin_3567_w	hypo_methylation
chr10@bin_1588_w	hypo_methylation
chrX@bin_106_c	hypo_methylation	Ftsj1
chr1@bin_1750_c	hypo_methylation
chr4@bin_3358_w	hypo_methylation
chr7@bin_3402_c	hypo_methylation
chr15@bin_2838_c	hypo_methylation
chr17@bin_2109_c	hypo_methylation
chr2@bin_608_w	hypo_methylation	Lcn9
chr5@bin_793_w	hypo_methylation	Ablim2
chr10@bin_3226_w	hypo_methylation
chr10@bin_674_w	hypo_methylation
chr7@bin_3674_c	hypo_methylation
chr1@bin_2947_w	hypo_methylation
chr12@bin_3603_w	hypo_methylation
chrX@bin_134_w	hypo_methylation	Xk
chr19@bin_1844_c	hypo_methylation	Cpn1
chr4@bin_5400_c	hypo_methylation
chr4@bin_4607_c	hypo_methylation
chr12@bin_1818_w	hypo_methylation	2700049A03Rik
chr8@bin_1628_c	hypo_methylation
chr12@bin_2754_c	hypo_methylation
chr14@bin_1472_c	hypo_methylation
chr15@bin_2596_c	hypo_methylation
chr1@bin_1801_w	hypo_methylation
chr15@bin_2998_w	hypo_methylation
chr3@bin_135_w	hypo_methylation
chr12@bin_3001_c	hypo_methylation	Trip11
chr3@bin_1153_c	hypo_methylation	AK132084
chr13@bin_3116_c	hypo_methylation
chr3@bin_354_c	hypo_methylation
chr13@bin_3854_c	hypo_methylation
chr10@bin_2735_c	hypo_methylation
chr7@bin_2832_w	hypo_methylation
chr17@bin_81_w	hypo_methylation	Zdhhc14
chr5@bin_2102_w	hypo_methylation	2018-09-11
chr12@bin_2079_c	hypo_methylation	Sptb
chr11@bin_2691_w	hypo_methylation	Camkk1
chr16@bin_818_w	hypo_methylation
chr4@bin_5695_c	hypo_methylation
chr6@bin_3209_w	hypo_methylation
chr7@bin_3281_c	hypo_methylation
chr5@bin_1777_c	hypo_methylation
chr18@bin_1669_w	hypo_methylation
chr1@bin_984_w	hypo_methylation
chr3@bin_3721_w	hypo_methylation
chr3@bin_3504_w	hypo_methylation	Abca4
chr2@bin_3567_w	hypo_methylation
chr18@bin_2648_c	hypo_methylation
chr9@bin_3388_c	hypo_methylation	Bsn
chrX@bin_171_c	hypo_methylation
chr13@bin_1295_w	hypo_methylation
chr16@bin_2359_c	hypo_methylation
chr9@bin_2676_w	hypo_methylation
chr2@bin_2206_c	hypo_methylation
chr12@bin_3355_w	hypo_methylation
chr17@bin_1751_w	hypo_methylation
chr12@bin_1834_w	hypo_methylation	AK050197
chr4@bin_4795_c	hypo_methylation
chr4@bin_4450_c	hypo_methylation	Zdhhc18
chr14@bin_3397_c	hypo_methylation
chr9@bin_3440_c	hypo_methylation
chr2@bin_3913_w	hypo_methylation
chr9@bin_2764_w	hypo_methylation
chr8@bin_139_c	hypo_methylation
chr7@bin_1525_c	hypo_methylation
chr5@bin_3588_w	hypo_methylation
chr7@bin_4594_w	hypo_methylation
chr2@bin_5930_c	hypo_methylation
chr2@bin_4022_w	hypo_methylation
chr5@bin_3445_c	hypo_methylation
chr5@bin_5435_w	hypo_methylation
chr8@bin_1242_c	hypo_methylation	Ankrd37
chr13@bin_851_w	hypo_methylation
chr4@bin_166_c	hypo_methylation	Asph
chr19@bin_754_w	hypo_methylation
chr10@bin_4090_c	hypo_methylation	Rab21
chr3@bin_152_w	hypo_methylation
chr12@bin_3046_w	hypo_methylation
chr1@bin_4896_c	hypo_methylation
chr14@bin_2173_c	hypo_methylation	Extl3
chr13@bin_3162_w	hypo_methylation
chr15@bin_2081_c	hypo_methylation
chr7@bin_2528_w	hypo_methylation
chr12@bin_3737_w	hypo_methylation
chrX@bin_603_c	hypo_methylation
chr10@bin_2025_w	hypo_methylation
chr5@bin_5314_w	hypo_methylation
chr15@bin_2523_w	hypo_methylation	Grap2
chr10@bin_3630_w	hypo_methylation
chr7@bin_1449_w	hypo_methylation
chr11@bin_6022_c	hypo_methylation
chr3@bin_3357_w	hypo_methylation	Dbt
chr9@bin_2448_w	hypo_methylation
chr10@bin_3555_c	hypo_methylation	Vezt
chr19@bin_2154_c	hypo_methylation	Sh3pxd2a
chr10@bin_1059_w	hypo_methylation
chr1@bin_2771_c	hypo_methylation
chr6@bin_3209_c	hypo_methylation	Ntf3
chr17@bin_2479_c	hypo_methylation	Foxp4
chr6@bin_377_w	hypo_methylation
chr4@bin_1910_c	hypo_methylation
chr17@bin_214_c	hypo_methylation
chr1@bin_367_w	hypo_methylation
chr1@bin_4813_c	hypo_methylation
chr16@bin_106_w	hypo_methylation	Alg1
chr1@bin_3385_c	hypo_methylation
chr6@bin_2588_c	hypo_methylation
chr15@bin_2399_c	hypo_methylation	Fam227a
chr11@bin_4331_w	hypo_methylation
chr17@bin_3593_w	hypo_methylation	Crim1
chr4@bin_5368_c	hypo_methylation	Crocc
chr17@bin_3574_w	hypo_methylation
chr1@bin_2463_w	hypo_methylation
chr1@bin_1950_w	hypo_methylation	Rufy4
chr13@bin_285_c	hypo_methylation	Tbce
chr4@bin_2262_w	hypo_methylation
chr3@bin_1362_c	hypo_methylation
chr14@bin_1932_c	hypo_methylation	Setdb2-phf11c
chr17@bin_3961_w	hypo_methylation	Prkce
chr1@bin_4999_c	hypo_methylation	Pbx1
chr5@bin_3942_c	hypo_methylation	Rilpl2
chr15@bin_1172_c	hypo_methylation
chr7@bin_3616_c	hypo_methylation
chr12@bin_2873_w	hypo_methylation
chr18@bin_2122_w	hypo_methylation
chr5@bin_5061_w	hypo_methylation
chr10@bin_602_w	hypo_methylation
chr3@bin_1633_c	hypo_methylation	Veph1
chr17@bin_766_w	hypo_methylation
chr2@bin_1254_w	hypo_methylation	Fam129b
chr2@bin_6572_c	hypo_methylation
chr15@bin_3089_c	hypo_methylation
chr6@bin_3110_w	hypo_methylation
chr4@bin_4591_w	hypo_methylation
chr19@bin_2134_w	hypo_methylation
chr3@bin_3370_c	hypo_methylation	Agl
chr8@bin_2687_c	hypo_methylation
chr8@bin_32_w	hypo_methylation	Mcemp1
chr10@bin_492_c	hypo_methylation
chr3@bin_3111_w	hypo_methylation
chr11@bin_3926_w	hypo_methylation
chr1@bin_6031_c	hypo_methylation
chr17@bin_3222_w	hypo_methylation
chr5@bin_4436_c	hypo_methylation
chr5@bin_1406_c	hypo_methylation
chr4@bin_1071_c	hypo_methylation	Pax5
chr17@bin_314_c	hypo_methylation
chr2@bin_1426_w	hypo_methylation	Gsn
chrX@bin_1475_c	hypo_methylation
chr19@bin_612_c	hypo_methylation	Dagla
chr4@bin_5879_w	hypo_methylation
chr1@bin_1956_w	hypo_methylation
chr10@bin_1868_c	hypo_methylation
chr12@bin_3023_w	hypo_methylation	Rin3
chr1@bin_5241_c	hypo_methylation	Cadm3
chr4@bin_5639_c	hypo_methylation	Tnfrsf8
chr8@bin_409_w	hypo_methylation
chr10@bin_4339_c	hypo_methylation
chr19@bin_1350_w	hypo_methylation
chr19@bin_333_c	hypo_methylation
chr2@bin_3189_w	hypo_methylation
chr3@bin_1713_w	hypo_methylation	Ppm1l
chr11@bin_6278_c	hypo_methylation
chr4@bin_461_c	hypo_methylation
chr13@bin_2023_w	hypo_methylation
chr16@bin_1408_c	hypo_methylation
chr13@bin_4001_w	hypo_methylation	Gm7120
chr12@bin_2744_w	hypo_methylation
chr1@bin_2630_w	hypo_methylation
chr12@bin_2400_w	hypo_methylation
chr1@bin_4395_w	hypo_methylation
chr10@bin_4108_w	hypo_methylation
chr14@bin_1762_w	hypo_methylation	Irf9,Rnf31
chr4@bin_4522_w	hypo_methylation
chr15@bin_4009_c	hypo_methylation
chr12@bin_1869_w	hypo_methylation	Jkamp
chr5@bin_939_c	hypo_methylation
chr8@bin_1345_w	hypo_methylation	Cldn22
chr12@bin_1855_c	hypo_methylation
chr11@bin_1723_w	hypo_methylation
chr9@bin_3522_c	hypo_methylation	Klhl18
chr6@bin_874_c	hypo_methylation
chr8@bin_1345_c	hypo_methylation	BC040690
chr13@bin_3899_w	hypo_methylation
chr4@bin_3042_w	hypo_methylation
chr10@bin_3250_c	hypo_methylation
chr13@bin_3850_c	hypo_methylation	Hspb3
chr2@bin_3972_w	hypo_methylation
chr3@bin_3516_c	hypo_methylation
chr18@bin_888_c	hypo_methylation	Nrg2
chr13@bin_572_c	hypo_methylation
chr13@bin_1950_w	hypo_methylation	Tgfbi
chr9@bin_2897_c	hypo_methylation	Zbtb38
chr6@bin_2215_c	hypo_methylation
chr6@bin_420_c	hypo_methylation
chr11@bin_6118_c	hypo_methylation	Cep131
chr2@bin_4795_c	hypo_methylation	Nanp
chr18@bin_2795_w	hypo_methylation
chr7@bin_4122_c	hypo_methylation	Ppp4c
chr16@bin_1064_c	hypo_methylation
chr12@bin_178_w	hypo_methylation
chr4@bin_5936_w	hypo_methylation
chr14@bin_2790_c	hypo_methylation
chr2@bin_6339_c	hypo_methylation
chr9@bin_3085_c	hypo_methylation	Ephb1
chr11@bin_59_w	hypo_methylation
chr12@bin_826_c	hypo_methylation
chr18@bin_2328_w	hypo_methylation	Gm10532
chr17@bin_3202_w	hypo_methylation
chr3@bin_944_c	hypo_methylation
chr17@bin_3653_c	hypo_methylation
chr8@bin_260_c	hypo_methylation
chr2@bin_2387_w	hypo_methylation
chr2@bin_5768_c	hypo_methylation
chr2@bin_5048_w	hypo_methylation	Raly
chr17@bin_4019_c	hypo_methylation
chr18@bin_2769_c	hypo_methylation
chr8@bin_149_c	hypo_methylation
chr10@bin_4192_w	hypo_methylation
chr8@bin_870_c	hypo_methylation
chr14@bin_1988_w	hypo_methylation	Mipep
chr12@bin_423_c	hypo_methylation
chr6@bin_1017_c	hypo_methylation
chr9@bin_126_w	hypo_methylation
chr16@bin_2748_w	hypo_methylation	Clic6
chr7@bin_4163_c	hypo_methylation
chr3@bin_2588_w	hypo_methylation
chr16@bin_1473_c	hypo_methylation
chr15@bin_3198_w	hypo_methylation
chr4@bin_1529_c	hypo_methylation
chr13@bin_1096_c	hypo_methylation
chr4@bin_663_w	hypo_methylation
chr1@bin_2206_w	hypo_methylation
chr7@bin_4663_c	hypo_methylation	Tcerg1l
chr3@bin_735_c	hypo_methylation
chr15@bin_4064_w	hypo_methylation	Tns2
chr4@bin_6266_c	hypo_methylation
chr17@bin_3538_w	hypo_methylation	Ltbp1
chr18@bin_1639_w	hypo_methylation
chr2@bin_1197_c	hypo_methylation
chr12@bin_3099_c	hypo_methylation
chr2@bin_5029_w	hypo_methylation
chr9@bin_3500_c	hypo_methylation
chr10@bin_1898_w	hypo_methylation
chr1@bin_6103_c	hypo_methylation
chr3@bin_2733_c	hypo_methylation
chr1@bin_4609_w	hypo_methylation
chr4@bin_3180_c	hypo_methylation
chr13@bin_3319_c	hypo_methylation
chr15@bin_638_c	hypo_methylation
chr4@bin_6516_c	hypo_methylation
chr13@bin_9_c	hypo_methylation
chr14@bin_2165_w	hypo_methylation
chr4@bin_6013_c	hypo_methylation	Park7
chr6@bin_3849_c	hypo_methylation	Itpr2
chr17@bin_456_w	hypo_methylation
chr7@bin_3716_w	hypo_methylation
chr14@bin_743_c	hypo_methylation
chr11@bin_4730_c	hypo_methylation	Map3k14
chr15@bin_141_w	hypo_methylation
chr18@bin_2706_w	hypo_methylation	Mbp
chr15@bin_3846_c	hypo_methylation	Lima1
chr1@bin_841_w	hypo_methylation	Fer1l5
chr6@bin_2986_w	hypo_methylation	Slc6a12
chr7@bin_1344_c	hypo_methylation
chr3@bin_367_w	hypo_methylation
chr3@bin_3239_w	hypo_methylation
chr5@bin_2035_c	hypo_methylation
chr17@bin_861_c	hypo_methylation
chr7@bin_2442_c	hypo_methylation
chr17@bin_2214_c	hypo_methylation
chr2@bin_1173_w	hypo_methylation
chr9@bin_742_c	hypo_methylation
chr18@bin_1266_c	hypo_methylation
chr19@bin_682_c	hypo_methylation	Ms4a7
chr4@bin_2963_c	hypo_methylation
chr15@bin_2266_w	hypo_methylation
chr9@bin_3965_c	hypo_methylation
chr11@bin_5354_w	hypo_methylation
chr19@bin_378_c	hypo_methylation	Rps6ka4
chr12@bin_3088_w	hypo_methylation
chr15@bin_3422_c	hypo_methylation
chr8@bin_3687_w	hypo_methylation	Cdh13
chr12@bin_3442_w	hypo_methylation	Eml1
chr18@bin_1864_w	hypo_methylation
chr2@bin_5357_c	hypo_methylation
chr4@bin_6011_c	hypo_methylation
chr2@bin_5237_c	hypo_methylation	Ghrh
chr2@bin_2937_w	hypo_methylation	Mybpc3
chr8@bin_183_w	hypo_methylation
chr18@bin_1472_c	hypo_methylation
chr2@bin_6129_c	hypo_methylation	Nfatc2
chr17@bin_989_c	hypo_methylation
chr7@bin_1403_w	hypo_methylation
chr2@bin_1361_w	hypo_methylation
chr5@bin_4728_w	hypo_methylation	Azgp1
chr17@bin_172_w	hypo_methylation
chr4@bin_1538_w	hypo_methylation
chr7@bin_104_w	hypo_methylation	Ssc5d
chr19@bin_1055_w	hypo_methylation	Kank1
chr5@bin_406_w	hypo_methylation
chr13@bin_2483_w	hypo_methylation
chr17@bin_2940_c	hypo_methylation
chr12@bin_1403_w	hypo_methylation
chr17@bin_3553_w	hypo_methylation
chr2@bin_3287_w	hypo_methylation
chr1@bin_4914_w	hypo_methylation	Tada1
chr6@bin_1028_w	hypo_methylation
chr16@bin_1455_c	hypo_methylation	Arhgap31
chr2@bin_23_w	hypo_methylation	Fam107b
chr3@bin_3352_c	hypo_methylation
chr9@bin_3341_w	hypo_methylation
chr11@bin_3741_w	hypo_methylation
chr1@bin_5002_w	hypo_methylation
chr11@bin_156_w	hypo_methylation	Rhbdd3
chr8@bin_202_c	hypo_methylation
chr9@bin_200_c	hypo_methylation
chr16@bin_1570_c	hypo_methylation	Boc
chr11@bin_4658_c	hypo_methylation
chr1@bin_430_w	hypo_methylation	Paqr8
chr14@bin_103_c	hypo_methylation
chr9@bin_2050_c	hypo_methylation
chr10@bin_1675_c	hypo_methylation	Pldi
chr2@bin_4590_w	hypo_methylation
chr3@bin_3245_w	hypo_methylation
chr12@bin_1511_c	hypo_methylation
chr18@bin_321_w	hypo_methylation
chr19@bin_1413_c	hypo_methylation
chr19@bin_697_w	hypo_methylation	Osbp
chr13@bin_1447_c	hypo_methylation
chr3@bin_4437_w	hypo_methylation
chr5@bin_2826_c	hypo_methylation	Myo18b
chr11@bin_2623_c	hypo_methylation
chr7@bin_514_c	hypo_methylation
chr18@bin_982_w	hypo_methylation	Gm38666,Gm38667,AK149307,Gm37013
chr14@bin_446_w	hypo_methylation
chr3@bin_2909_c	hypo_methylation
chr6@bin_2695_c	hypo_methylation	Vgll4
chr2@bin_4630_w	hypo_methylation
chr7@bin_1484_c	hypo_methylation
chr7@bin_4559_w	hypo_methylation	Ptpre
chr8@bin_2509_c	hypo_methylation
chr11@bin_1725_w	hypo_methylation
chr19@bin_1773_c	hypo_methylation	Hps1
chr11@bin_5200_c	hypo_methylation	BC006965
chr19@bin_2478_c	hypo_methylation
chr16@bin_107_w	hypo_methylation	Alg1
chr6@bin_3880_c	hypo_methylation
chr17@bin_4038_w	hypo_methylation
chr5@bin_5319_w	hypo_methylation
chr5@bin_2883_w	hypo_methylation	DQ552775,DQ561436,Aym1
chr12@bin_1949_c	hypo_methylation
chr7@bin_3755_c	hypo_methylation	Plekha7
chr11@bin_920_c	hypo_methylation
chr3@bin_2608_c	hypo_methylation
chr12@bin_2527_w	hypo_methylation	Jdp2
chr3@bin_3852_w	hypo_methylation	Tbck
chr9@bin_2076_c	hypo_methylation
chr16@bin_1958_w	hypo_methylation
chr18@bin_486_c	hypo_methylation
chr18@bin_134_c	hypo_methylation
chr3@bin_2866_c	hypo_methylation
chr6@bin_1001_w	hypo_methylation	AI854703
chr1@bin_3384_w	hypo_methylation
chr17@bin_348_c	hypo_methylation
chr3@bin_2364_w	hypo_methylation	Nup210l
chr7@bin_1084_w	hypo_methylation
chr12@bin_3362_c	hypo_methylation
chr3@bin_4206_c	hypo_methylation
chr18@bin_694_w	hypo_methylation	Lims2
chr17@bin_2876_w	hypo_methylation
chr19@bin_947_c	hypo_methylation	Mamdc2
chr3@bin_2139_c	hypo_methylation
chr16@bin_706_w	hypo_methylation
chr1@bin_4709_w	hypo_methylation	Serpinc1
chr2@bin_1032_c	hypo_methylation
chr9@bin_988_w	hypo_methylation
chr11@bin_252_w	hypo_methylation	Zmiz2
chr1@bin_233_w	hypo_methylation
chr9@bin_1569_w	hypo_methylation	Cspg4
chr2@bin_2611_c	hypo_methylation	Zfp385b
chr7@bin_1465_w	hypo_methylation
chr1@bin_5842_w	hypo_methylation
chr1@bin_204_w	hypo_methylation	A830018L16Rik
chr3@bin_344_w	hypo_methylation
chrX@bin_2516_w	hypo_methylation
chr12@bin_2419_w	hypo_methylation
chr19@bin_1948_c	hypo_methylation
chr2@bin_2613_c	hypo_methylation	Zfp385b
chr2@bin_2005_c	hypo_methylation
chr2@bin_169_w	hypo_methylation
chr11@bin_4810_c	hypo_methylation
chr19@bin_1828_c	hypo_methylation
chr14@bin_1718_c	hypo_methylation	Zfhx2
chr13@bin_3491_w	hypo_methylation
chr4@bin_861_c	hypo_methylation
chr10@bin_3358_c	hypo_methylation	Parpbp
chr5@bin_636_w	hypo_methylation
chr7@bin_803_w	hypo_methylation	Atp5sl
chr17@bin_75_w	hypo_methylation	Zdhhc14
chr2@bin_3745_w	hypo_methylation
chr12@bin_1432_w	hypo_methylation
chrX@bin_1991_w	hypo_methylation
chr12@bin_332_w	hypo_methylation
chr4@bin_5136_w	hypo_methylation
chr10@bin_4429_w	hypo_methylation	Gns
chr3@bin_4123_c	hypo_methylation
chr3@bin_3971_w	hypo_methylation
chr7@bin_165_c	hypo_methylation
chr4@bin_2210_w	hypo_methylation	AK044374
chr15@bin_588_c	hypo_methylation
chr13@bin_3453_c	hypo_methylation	Pik3r1
chr6@bin_1416_w	hypo_methylation
chrX@bin_2107_c	hypo_methylation
chr2@bin_6787_c	hypo_methylation	Lama5
chr7@bin_984_c	hypo_methylation	Pak4
chr4@bin_3427_w	hypo_methylation
chr15@bin_1741_c	hypo_methylation
chr9@bin_1210_w	hypo_methylation	Sik3
chr15@bin_3965_c	hypo_methylation
chr8@bin_2792_c	hypo_methylation
chr17@bin_1061_w	hypo_methylation
chr3@bin_4016_c	hypo_methylation
chr7@bin_3615_c	hypo_methylation
chr14@bin_1673_c	hypo_methylation
chr5@bin_87_w	hypo_methylation
chr1@bin_4470_c	hypo_methylation
chr9@bin_384_w	hypo_methylation
chr17@bin_2624_c	hypo_methylation
chr13@bin_4014_w	hypo_methylation
chr13@bin_2721_c	hypo_methylation
chr6@bin_2031_c	hypo_methylation
chr14@bin_3080_w	hypo_methylation
chr13@bin_3151_c	hypo_methylation
chr11@bin_4079_w	hypo_methylation
chr2@bin_6312_c	hypo_methylation	Bcas1
chr2@bin_1628_c	hypo_methylation	Lrp1b
chr5@bin_3661_c	hypo_methylation
chr7@bin_4782_c	hypo_methylation
chr3@bin_3070_c	hypo_methylation
chr2@bin_3819_w	hypo_methylation	Itpka
chr10@bin_1792_w	hypo_methylation
chr1@bin_5353_w	hypo_methylation	Desi2
chr7@bin_3801_w	hypo_methylation
chr4@bin_250_w	hypo_methylation
chr4@bin_1576_c	hypo_methylation
chr8@bin_3600_c	hypo_methylation
chr18@bin_1339_w	hypo_methylation
chr9@bin_4116_w	hypo_methylation	Fam198a
chr4@bin_2840_w	hypo_methylation	Glis1
chr6@bin_2751_w	hypo_methylation
chr2@bin_1803_w	hypo_methylation
chr6@bin_1025_w	hypo_methylation
chr16@bin_1162_c	hypo_methylation
chr3@bin_2037_w	hypo_methylation	Tmem154
chr13@bin_3770_w	hypo_methylation
chr2@bin_6410_w	hypo_methylation
chr17@bin_967_w	hypo_methylation	Neurl1b
chr12@bin_2012_c	hypo_methylation	Wdr89
chr9@bin_2111_c	hypo_methylation	Rab8b
chr12@bin_1222_c	hypo_methylation
chr13@bin_3334_c	hypo_methylation	Tnpo1
chr4@bin_4928_w	hypo_methylation
chr5@bin_1268_c	hypo_methylation
chr9@bin_589_c	hypo_methylation	Ntm
chr2@bin_5838_w	hypo_methylation
chr8@bin_2595_w	hypo_methylation	Fto
chr19@bin_2106_c	hypo_methylation
chr10@bin_4546_c	hypo_methylation
chr12@bin_3644_c	hypo_methylation	Cdc42bpb
chr17@bin_3921_w	hypo_methylation
chr13@bin_1148_c	hypo_methylation
chr5@bin_4164_w	hypo_methylation
chr7@bin_3856_c	hypo_methylation
chr18@bin_623_w	hypo_methylation
chr2@bin_3587_w	hypo_methylation
chr6@bin_2385_w	hypo_methylation
chr15@bin_2268_c	hypo_methylation
chr13@bin_1242_w	hypo_methylation
chr16@bin_2651_w	hypo_methylation
chr6@bin_1903_c	hypo_methylation	Dusp11
chr14@bin_2109_w	hypo_methylation
chr12@bin_2986_c	hypo_methylation
chr3@bin_1248_c	hypo_methylation
chr8@bin_392_w	hypo_methylation
chr4@bin_353_c	hypo_methylation
chr9@bin_3700_c	hypo_methylation	Cmtm7
chrX@bin_1014_w	hypo_methylation
chr15@bin_1570_c	hypo_methylation
chr1@bin_1647_c	hypo_methylation
chr10@bin_4028_c	hypo_methylation	4933440J02Rik
chr7@bin_3861_w	hypo_methylation
chr2@bin_431_w	hypo_methylation
chr17@bin_2481_c	hypo_methylation	Foxp4
chr6@bin_993_c	hypo_methylation
chr17@bin_2702_w	hypo_methylation
chr16@bin_152_c	hypo_methylation
chr15@bin_1307_c	hypo_methylation	Samd12
chr5@bin_3829_w	hypo_methylation	Psmd9
chr10@bin_134_w	hypo_methylation
chr13@bin_3979_w	hypo_methylation
chr11@bin_5767_c	hypo_methylation
chr1@bin_2076_w	hypo_methylation
chr7@bin_989_w	hypo_methylation
chr5@bin_3626_w	hypo_methylation
chr12@bin_2298_c	hypo_methylation
chr3@bin_447_w	hypo_methylation
chr5@bin_3506_w	hypo_methylation
chr13@bin_1598_c	hypo_methylation
chr3@bin_4479_w	hypo_methylation
chr12@bin_1382_c	hypo_methylation
chr2@bin_4807_c	hypo_methylation
chr13@bin_2710_c	hypo_methylation
chr4@bin_4155_c	hypo_methylation
chr14@bin_2294_c	hypo_methylation	4930438E09Rik
chr17@bin_19_c	hypo_methylation	Nox3
chr17@bin_284_w	hypo_methylation
chr3@bin_3498_c	hypo_methylation
chr15@bin_3847_c	hypo_methylation	Lima1
chr14@bin_1527_w	hypo_methylation
chrX@bin_1963_w	hypo_methylation	Armcx4
chr15@bin_3793_w	hypo_methylation
chr19@bin_1944_w	hypo_methylation
chr17@bin_284_c	hypo_methylation
chr11@bin_1039_w	hypo_methylation	Slit3
chr8@bin_4377_w	hypo_methylation
chr1@bin_3346_w	hypo_methylation
chr4@bin_2600_w	hypo_methylation	0610043K17Rik
chr9@bin_1023_c	hypo_methylation
chr13@bin_3330_w	hypo_methylation
chr4@bin_179_w	hypo_methylation
chr8@bin_2304_w	hypo_methylation
chr8@bin_1434_c	hypo_methylation
chr3@bin_76_w	hypo_methylation
chr4@bin_709_w	hypo_methylation
chr2@bin_6586_c	hypo_methylation
chr10@bin_2312_c	hypo_methylation
chr16@bin_826_w	hypo_methylation
chr8@bin_2117_w	hypo_methylation
chr18@bin_2068_c	hypo_methylation
chr1@bin_5274_w	hypo_methylation
chr19@bin_946_w	hypo_methylation
chr5@bin_1510_c	hypo_methylation
chr9@bin_1168_w	hypo_methylation	Dscaml1
chr2@bin_6710_w	hypo_methylation
chr15@bin_1476_c	hypo_methylation	Mtss1
chr6@bin_362_c	hypo_methylation	Wasl
chr8@bin_3587_c	hypo_methylation
chr5@bin_5390_c	hypo_methylation
chr17@bin_173_c	hypo_methylation	Fndc1
chr9@bin_4054_w	hypo_methylation
chr7@bin_599_w	hypo_methylation
chr2@bin_4981_c	hypo_methylation
chr10@bin_1728_w	hypo_methylation	Lrrc20
chr8@bin_168_c	hypo_methylation	Fam155a
chr4@bin_1411_c	hypo_methylation
chr15@bin_3699_c	hypo_methylation
chr7@bin_3692_w	hypo_methylation	Spon1
chr10@bin_2260_c	hypo_methylation	Cisd1
chr11@bin_6113_c	hypo_methylation
chr1@bin_6066_c	hypo_methylation
chr2@bin_6429_c	hypo_methylation
chr16@bin_2940_w	hypo_methylation
chr7@bin_1148_c	hypo_methylation
chr17@bin_2323_c	hypo_methylation	Cul9
chr17@bin_1975_w	hypo_methylation
chr17@bin_3557_w	hypo_methylation
chr12@bin_1226_w	hypo_methylation
chr19@bin_217_c	hypo_methylation
chr2@bin_1108_c	hypo_methylation	Fibcd1
chr16@bin_1490_c	hypo_methylation
chr10@bin_1981_w	hypo_methylation
chr19@bin_2023_w	hypo_methylation
chr9@bin_1693_w	hypo_methylation	4930461G14Rik
chr2@bin_753_w	hypo_methylation	Rxra
chr12@bin_1948_c	hypo_methylation
chr1@bin_4100_w	hypo_methylation
chr11@bin_1533_w	hypo_methylation
chr10@bin_4210_w	hypo_methylation
chr13@bin_555_w	hypo_methylation	D130043K22Rik
chr18@bin_1314_c	hypo_methylation
chr14@bin_855_w	hypo_methylation
chr13@bin_3163_w	hypo_methylation
chr11@bin_5113_w	hypo_methylation	Arsg
chr8@bin_913_c	hypo_methylation
chr7@bin_439_c	hypo_methylation	Hif3a
chr5@bin_5179_w	hypo_methylation	Bri3
chr8@bin_2202_c	hypo_methylation
chr1@bin_126_c	hypo_methylation	Sntg1
chr12@bin_3186_c	hypo_methylation	Syne3
chr8@bin_3866_w	hypo_methylation	Gse1
chr2@bin_4583_c	hypo_methylation	Bfsp1
chr7@bin_31_w	hypo_methylation
chr12@bin_3686_w	hypo_methylation
chr18@bin_805_c	hypo_methylation
chr17@bin_845_w	hypo_methylation	Tpsg1
chr11@bin_5367_c	hypo_methylation
chr8@bin_3868_w	hypo_methylation	Gse1
chr8@bin_3562_c	hypo_methylation
chr10@bin_1945_c	hypo_methylation
chr1@bin_2533_w	hypo_methylation	Sh3bp4
chr13@bin_965_w	hypo_methylation
chr6@bin_1237_w	hypo_methylation
chr16@bin_222_c	hypo_methylation
chr2@bin_5015_w	hypo_methylation	Bpifb1
chr1@bin_4206_c	hypo_methylation
chr8@bin_3562_w	hypo_methylation	Atmin
chr16@bin_396_w	hypo_methylation	Abcc1
chr4@bin_515_c	hypo_methylation
chr10@bin_4103_c	hypo_methylation
chr13@bin_107_w	hypo_methylation
chr6@bin_1283_c	hypo_methylation	Pde1c
chr16@bin_397_c	hypo_methylation
chr2@bin_271_w	hypo_methylation
chr12@bin_848_c	hypo_methylation
chr15@bin_930_w	hypo_methylation
chr17@bin_1979_c	hypo_methylation
chr4@bin_1281_w	hypo_methylation
chr9@bin_1935_w	hypo_methylation
chr12@bin_2503_w	hypo_methylation
chr7@bin_4665_c	hypo_methylation	Tcerg1l
chr18@bin_2585_c	hypo_methylation
chr14@bin_1581_c	hypo_methylation	Sall2
chr15@bin_603_c	hypo_methylation
chr4@bin_4078_c	hypo_methylation
chr5@bin_2948_w	hypo_methylation	Dao
chr11@bin_4282_w	hypo_methylation	Cdc6
chr1@bin_4145_w	hypo_methylation
chr16@bin_2737_c	hypo_methylation	Rcan1
chr5@bin_1590_c	hypo_methylation
chr11@bin_1291_w	hypo_methylation
chr14@bin_1175_w	hypo_methylation
chr4@bin_3249_c	hypo_methylation
chrX@bin_2226_w	hypo_methylation
chr3@bin_4307_c	hypo_methylation
chr14@bin_548_w	hypo_methylation	DQ699214,DQ725126,DQ685755,DQ706335,DQ690425,DQ712110,DQ553519,DQ725189,DQ695412,DQ704134,DQ710144,DQ547508,DQ696282,DQ690858,DQ687046
chr19@bin_2095_w	hypo_methylation	Wbp1l
chr11@bin_4007_c	hypo_methylation	Snx11
chr5@bin_4819_c	hypo_methylation	3110082I17Rik
chr17@bin_627_c	hypo_methylation
chr6@bin_1_c	hypo_methylation
chr17@bin_1873_w	hypo_methylation
chr15@bin_695_c	hypo_methylation
chr9@bin_3584_w	hypo_methylation	Trank1
chr13@bin_623_c	hypo_methylation	2610307P16Rik
chr8@bin_2182_w	hypo_methylation	AK085891
chr19@bin_2095_c	hypo_methylation
chr2@bin_315_w	hypo_methylation	Plxdc2
chr9@bin_4019_c	hypo_methylation
chr2@bin_4093_w	hypo_methylation
chr2@bin_1863_c	hypo_methylation
chr3@bin_2526_c	hypo_methylation
chr8@bin_535_c	hypo_methylation
chr16@bin_2088_w	hypo_methylation
chr5@bin_2699_c	hypo_methylation
chr11@bin_3139_w	hypo_methylation
chr11@bin_1978_w	hypo_methylation
chr15@bin_1845_w	hypo_methylation
chr4@bin_4227_c	hypo_methylation
chr12@bin_862_c	hypo_methylation
chr12@bin_40_c	hypo_methylation
chr7@bin_2275_c	hypo_methylation
chr1@bin_3606_c	hypo_methylation	Rassf5
chr7@bin_1067_w	hypo_methylation	Ppp1r14a
chr2@bin_2499_w	hypo_methylation
chr9@bin_2525_c	hypo_methylation
chr6@bin_2864_c	hypo_methylation	Cacna1c
chr9@bin_2280_w	hypo_methylation
chrX@bin_756_c	hypo_methylation
chr3@bin_3468_c	hypo_methylation	Slc44a3
chr15@bin_574_c	hypo_methylation
chr17@bin_2326_c	hypo_methylation	Srf
chr5@bin_2466_c	hypo_methylation
chr15@bin_3084_c	hypo_methylation
chr11@bin_4641_w	hypo_methylation	Grn
chr13@bin_2277_c	hypo_methylation
chr7@bin_2487_c	hypo_methylation
chr9@bin_3731_w	hypo_methylation	Osbpl10
chr11@bin_3724_c	hypo_methylation
chr19@bin_1361_w	hypo_methylation	Fas
chr8@bin_3504_c	hypo_methylation
chr2@bin_3346_w	hypo_methylation	Elf5
chr11@bin_2899_w	hypo_methylation
chr10@bin_3162_c	hypo_methylation
chr4@bin_2556_c	hypo_methylation
chr2@bin_5621_w	hypo_methylation
chr3@bin_2330_w	hypo_methylation
chr11@bin_5612_w	hypo_methylation
chr16@bin_1123_w	hypo_methylation
chr7@bin_1184_w	hypo_methylation
chr1@bin_2603_c	hypo_methylation	Asb18
chr17@bin_118_w	hypo_methylation
chr5@bin_3476_w	hypo_methylation
chr1@bin_793_c	hypo_methylation
chr18@bin_499_c	hypo_methylation
chr19@bin_574_w	hypo_methylation
chr11@bin_188_c	hypo_methylation
chr2@bin_2690_c	hypo_methylation
chr15@bin_661_c	hypo_methylation	Trio
chr1@bin_3825_w	hypo_methylation	Fmod
chr8@bin_2719_w	hypo_methylation	Nlrc5
chr9@bin_3253_c	hypo_methylation
chr17@bin_3175_c	hypo_methylation	Mtcl1
chr2@bin_2491_w	hypo_methylation
chr11@bin_5035_c	hypo_methylation	Cacng5
chr1@bin_344_w	hypo_methylation
chr7@bin_2025_c	hypo_methylation
chr11@bin_107_c	hypo_methylation
chr11@bin_186_c	hypo_methylation
chr14@bin_2031_w	hypo_methylation
chr11@bin_6263_c	hypo_methylation	Zfp750
chr13@bin_2608_w	hypo_methylation	Irx4
chr4@bin_2048_w	hypo_methylation
chr4@bin_4994_w	hypo_methylation	Ece1
chr5@bin_1691_c	hypo_methylation
chr1@bin_4536_c	hypo_methylation
chr4@bin_1081_c	hypo_methylation	Pax5
chr12@bin_2295_w	hypo_methylation
chr2@bin_5790_w	hypo_methylation	Eya2
chr13@bin_295_w	hypo_methylation
chr12@bin_2319_c	hypo_methylation
chr16@bin_2774_w	hypo_methylation
chr11@bin_3935_c	hypo_methylation
chr3@bin_2681_w	hypo_methylation	Gja5
chr4@bin_3329_w	hypo_methylation
chr16@bin_2983_c	hypo_methylation	Dscam
chr14@bin_3572_c	hypo_methylation
chr4@bin_5591_w	hypo_methylation
chr4@bin_6051_w	hypo_methylation
chr10@bin_4523_c	hypo_methylation	Mon2
chr18@bin_90_c	hypo_methylation
chr11@bin_2114_c	hypo_methylation
chr17@bin_2583_c	hypo_methylation	Gm17830
chr2@bin_2708_w	hypo_methylation
chr6@bin_740_c	hypo_methylation	Creb3l2
chr11@bin_845_c	hypo_methylation
chr3@bin_4009_w	hypo_methylation
chr12@bin_1695_c	hypo_methylation
chr2@bin_4800_w	hypo_methylation
chr10@bin_2382_w	hypo_methylation
chr18@bin_2118_c	hypo_methylation
chr5@bin_696_c	hypo_methylation	Fam53a
chr11@bin_980_c	hypo_methylation
chr16@bin_2772_c	hypo_methylation	Runx1
chr8@bin_3985_c	hypo_methylation
chr13@bin_447_c	hypo_methylation	Prss16
chr4@bin_6352_w	hypo_methylation
chr18@bin_196_c	hypo_methylation
chr11@bin_1801_c	hypo_methylation
chr4@bin_6184_c	hypo_methylation
chr9@bin_3086_c	hypo_methylation	Ephb1
chr10@bin_4535_w	hypo_methylation
chr11@bin_594_c	hypo_methylation
chr11@bin_3618_w	hypo_methylation	C030037D09Rik
chr15@bin_1120_c	hypo_methylation
chr12@bin_2070_c	hypo_methylation
chr7@bin_2750_c	hypo_methylation
chr6@bin_3919_w	hypo_methylation
chr1@bin_4059_c	hypo_methylation
[truncated: 289 more rows]

## Sheet: RALL-ameliorate DMR and DMG
Bin_ID	hyper_/hypo_	gene
chr10@bin_195_w	hyper_methylation
chr5@bin_5059_c	hyper_methylation	Tnrc18
chr12@bin_938_c	hyper_methylation
chrX@bin_2216_c	hyper_methylation
chr1@bin_3957_c	hyper_methylation	AK158038
chr11@bin_5447_w	hyper_methylation	Cd300a
chr15@bin_4083_c	hyper_methylation	Rarg
chr7@bin_2451_w	hyper_methylation
chr8@bin_655_c	hyper_methylation
chr8@bin_4195_w	hyper_methylation
chr8@bin_1149_c	hyper_methylation
chrX@bin_715_c	hyper_methylation
chr9@bin_2043_w	hyper_methylation	Clpx
chr4@bin_3900_c	hyper_methylation
chr15@bin_2977_c	hyper_methylation	Celsr1
chr1@bin_489_c	hyper_methylation
chr15@bin_1564_c	hyper_methylation
chr9@bin_398_w	hyper_methylation	Dnm2
chrX@bin_1335_w	hyper_methylation
chr18@bin_2825_w	hyper_methylation
chr4@bin_1177_c	hyper_methylation
chr11@bin_2558_c	hyper_methylation
chr1@bin_1794_w	hyper_methylation
chr2@bin_2034_w	hyper_methylation
chr19@bin_1752_c	hyper_methylation	Loxl4
chr7@bin_552_c	hyper_methylation	Mark4
chr19@bin_180_w	hyper_methylation
chr14@bin_1087_w	hyper_methylation	Grid1
chr18@bin_2192_c	hyper_methylation	Elac1
chr12@bin_3574_w	hyper_methylation	Dync1h1
chr1@bin_455_c	hyper_methylation
chr10@bin_648_w	hyper_methylation
chr15@bin_3480_w	hyper_methylation
chr4@bin_3411_w	hyper_methylation	Hivep3
chr13@bin_1297_c	hyper_methylation
chr5@bin_1680_c	hyper_methylation
chr13@bin_1074_c	hyper_methylation
chr8@bin_1252_c	hyper_methylation
chr10@bin_4900_w	hyper_methylation
chr6@bin_3650_c	hyper_methylation
chr11@bin_5803_c	hyper_methylation
chr3@bin_3783_c	hyper_methylation
chr9@bin_2189_c	hyper_methylation
chr11@bin_1035_c	hyper_methylation
chr7@bin_3853_c	hyper_methylation
chr17@bin_3954_c	hyper_methylation
chr19@bin_1713_c	hyper_methylation
chr13@bin_1298_w	hyper_methylation
chr12@bin_3412_c	hyper_methylation	Ccdc85c
chr2@bin_4455_w	hyper_methylation	Plcb4
chr5@bin_4357_c	hyper_methylation	Auts2
chr3@bin_3185_w	hyper_methylation
chr4@bin_4198_c	hyper_methylation
chr11@bin_244_c	hyper_methylation
chr3@bin_489_w	hyper_methylation
chr15@bin_177_c	hyper_methylation
chr19@bin_2542_w	hyper_methylation
chr7@bin_2651_c	hyper_methylation
chr3@bin_4167_w	hyper_methylation
chr5@bin_4889_w	hyper_methylation
chr3@bin_4378_c	hyper_methylation
chr11@bin_3683_c	hyper_methylation
chr18@bin_2415_c	hyper_methylation
chr17@bin_3710_c	hyper_methylation	Slc8a1
chr14@bin_2282_w	hyper_methylation
chr11@bin_1908_w	hyper_methylation	Wnt9a
chr8@bin_4253_w	hyper_methylation
chrX@bin_1339_c	hyper_methylation	Maged1
chr5@bin_2488_c	hyper_methylation
chr11@bin_4881_c	hyper_methylation	2018-03-10
chr10@bin_3434_w	hyper_methylation	Anks1b
chr4@bin_6203_w	hyper_methylation
chr4@bin_2482_c	hyper_methylation
chr7@bin_2653_w	hyper_methylation	Abhd2
chr11@bin_4366_c	hyper_methylation
chr5@bin_3565_c	hyper_methylation
chr9@bin_1598_c	hyper_methylation
chr5@bin_4946_w	hyper_methylation
chr2@bin_1114_w	hyper_methylation
chr5@bin_2642_w	hyper_methylation
chr14@bin_337_c	hyper_methylation	Nr1d2
chr4@bin_5363_w	hyper_methylation
chr6@bin_3295_c	hyper_methylation
chr17@bin_2337_c	hyper_methylation	Ptk7
chr13@bin_3921_w	hyper_methylation
chr7@bin_2784_c	hyper_methylation	Crtc3
chr2@bin_3099_w	hyper_methylation
chr6@bin_604_w	hyper_methylation
chr15@bin_2750_c	hyper_methylation	Scube1
chr15@bin_2083_c	hyper_methylation	Recql4
chr1@bin_4968_c	hyper_methylation
chr15@bin_2971_c	hyper_methylation	Celsr1
chr14@bin_2156_c	hyper_methylation
chr1@bin_1108_w	hyper_methylation	Tmem182
chr2@bin_3094_c	hyper_methylation
chr17@bin_4068_w	hyper_methylation
chr1@bin_4960_w	hyper_methylation
chr8@bin_154_c	hyper_methylation	Fam155a
chr19@bin_2225_w	hyper_methylation
chr14@bin_3091_w	hyper_methylation
chr1@bin_1694_c	hyper_methylation
chr3@bin_1211_w	hyper_methylation
chr4@bin_1293_w	hyper_methylation	Col15a1
chr11@bin_2605_c	hyper_methylation
chr11@bin_4201_c	hyper_methylation	1700003D09Rik
chr10@bin_1236_w	hyper_methylation	Prep
chr12@bin_1044_w	hyper_methylation
chr14@bin_2669_w	hyper_methylation
chr2@bin_5083_c	hyper_methylation	Gss
chr10@bin_3247_c	hyper_methylation
chr2@bin_6845_c	hyper_methylation	AK045142
chr4@bin_5291_c	hyper_methylation
chr11@bin_1502_w	hyper_methylation	Phykpl
chr18@bin_910_w	hyper_methylation
chr8@bin_3160_c	hyper_methylation
chr5@bin_4574_c	hyper_methylation
chr5@bin_2834_c	hyper_methylation	Adrbk2
chr10@bin_4065_c	hyper_methylation
chr5@bin_2996_c	hyper_methylation	Kctd10
chr3@bin_2325_c	hyper_methylation
chr2@bin_4058_c	hyper_methylation	Atp8b4
chr12@bin_551_c	hyper_methylation	1700030C10Rik
chr4@bin_6100_c	hyper_methylation	Camta1
chr5@bin_3899_c	hyper_methylation
chr11@bin_6101_w	hyper_methylation
chr2@bin_1587_c	hyper_methylation
chr1@bin_2148_w	hyper_methylation
chr4@bin_1932_w	hyper_methylation
chr3@bin_3152_w	hyper_methylation
chr14@bin_2269_w	hyper_methylation
chr13@bin_1964_c	hyper_methylation	Trpc7
chr11@bin_4360_c	hyper_methylation
chr7@bin_3494_c	hyper_methylation
chr2@bin_6754_w	hyper_methylation	Cdh4
chr2@bin_4915_w	hyper_methylation	Tpx2
chr9@bin_1172_c	hyper_methylation
chr7@bin_2834_w	hyper_methylation
chr10@bin_2423_w	hyper_methylation
chr18@bin_1562_c	hyper_methylation
chr1@bin_4133_w	hyper_methylation
chr18@bin_1566_w	hyper_methylation	Megf10
chr7@bin_3537_c	hyper_methylation
chr1@bin_2614_c	hyper_methylation
chr2@bin_5080_c	hyper_methylation	Acss2os
chr11@bin_1799_w	hyper_methylation
chr4@bin_6363_w	hyper_methylation
chr3@bin_198_c	hyper_methylation
chr14@bin_1808_c	hyper_methylation
chr11@bin_5922_c	hyper_methylation
chr8@bin_3499_c	hyper_methylation
chr4@bin_5890_c	hyper_methylation
chr6@bin_701_c	hyper_methylation
chr12@bin_2530_c	hyper_methylation
chr1@bin_4901_w	hyper_methylation
chr11@bin_3682_w	hyper_methylation
chr4@bin_6290_c	hyper_methylation	Ajap1
chr17@bin_2065_w	hyper_methylation
chr6@bin_2496_c	hyper_methylation
chrX@bin_710_c	hyper_methylation
chr18@bin_1046_w	hyper_methylation
chr10@bin_535_w	hyper_methylation
chr11@bin_5667_w	hyper_methylation
chr2@bin_3043_w	hyper_methylation
chr12@bin_3703_w	hyper_methylation
chr10@bin_1193_w	hyper_methylation
chr9@bin_1376_c	hyper_methylation	Dlat
chr4@bin_3606_w	hyper_methylation
chr7@bin_23_c	hyper_methylation
chr5@bin_2238_w	hyper_methylation
chr16@bin_830_c	hyper_methylation	Bcl6
chr1@bin_66_w	hyper_methylation
chr12@bin_941_c	hyper_methylation
chr6@bin_587_c	hyper_methylation
chr17@bin_2393_c	hyper_methylation
chr10@bin_3075_c	hyper_methylation
chr6@bin_3865_c	hyper_methylation
chr2@bin_6144_c	hyper_methylation
chr5@bin_2253_w	hyper_methylation	Tmem150cos
chr19@bin_2351_w	hyper_methylation
chr10@bin_2362_c	hyper_methylation
chr9@bin_3549_w	hyper_methylation	Prss43
chr2@bin_2227_w	hyper_methylation
chr10@bin_1445_c	hyper_methylation
chr1@bin_4996_w	hyper_methylation
chr1@bin_4704_c	hyper_methylation
chr17@bin_2960_w	hyper_methylation
chr15@bin_1976_w	hyper_methylation	AK158547
chr18@bin_1091_w	hyper_methylation
chr5@bin_2520_c	hyper_methylation
chr16@bin_1031_c	hyper_methylation
chr5@bin_2347_w	hyper_methylation	Arhgap24
chr3@bin_796_c	hyper_methylation
chr14@bin_186_w	hyper_methylation	Ptprg
chr17@bin_1496_w	hyper_methylation	Pde9a
chr9@bin_1562_c	hyper_methylation
chr19@bin_1058_c	hyper_methylation
chr8@bin_1121_w	hyper_methylation
chr16@bin_1984_c	hyper_methylation
chr7@bin_1689_w	hyper_methylation
chr12@bin_3823_c	hyper_methylation	Jag2
chr17@bin_1751_c	hyper_methylation	Cfb,C2
chr1@bin_1253_w	hyper_methylation
chr4@bin_414_w	hyper_methylation
chr7@bin_466_w	hyper_methylation
chr3@bin_3727_w	hyper_methylation
chr5@bin_4083_w	hyper_methylation	Tmem132b
chr12@bin_933_w	hyper_methylation	Atxn7l1
chr18@bin_2770_c	hyper_methylation
chr6@bin_3146_c	hyper_methylation
chr1@bin_3668_w	hyper_methylation
chr1@bin_2717_w	hyper_methylation	Asb1
chr5@bin_3179_w	hyper_methylation
chr2@bin_6576_c	hyper_methylation
chr4@bin_4704_w	hyper_methylation
chr18@bin_1006_w	hyper_methylation	Pcdhgc3,Pcdhgc4,Pcdhgc5,Gm38666,Gm38667,Pcdhga8,Pcdhga9,Pcdhga2,Pcdhga1,Pcdhga6,Pcdhga7,Pcdhga4,Pcdhgb2,Pcdhgb1,Pcdhgb7,Pcdhgb6,Pcdhgb5,Pcdhgb4,Pcdhgb8,Pcdhga10,Pcdhga12,Pcdhga11,Pcdhga3,Pcdhga5,Gm37013
chr1@bin_4691_w	hyper_methylation
chr6@bin_1451_c	hyper_methylation
chr1@bin_5952_w	hyper_methylation	AK142161
chr14@bin_1698_w	hyper_methylation	Pabpn1
chr4@bin_5189_c	hyper_methylation
chr8@bin_521_c	hyper_methylation
chrX@bin_724_w	hyper_methylation
chr13@bin_2999_c	hyper_methylation	Msh3
chr10@bin_3034_c	hyper_methylation
chr3@bin_1403_w	hyper_methylation
chr4@bin_2916_w	hyper_methylation
chr7@bin_4626_c	hyper_methylation
chr1@bin_657_w	hyper_methylation	Khdrbs2
chr3@bin_961_c	hyper_methylation
chr3@bin_958_c	hyper_methylation
chr15@bin_19_c	hyper_methylation
chr6@bin_3457_c	hyper_methylation
chr9@bin_1616_w	hyper_methylation
chr1@bin_5188_c	hyper_methylation
chr13@bin_3967_c	hyper_methylation
chr12@bin_3964_c	hyper_methylation
chr12@bin_936_w	hyper_methylation	Atxn7l1
chr15@bin_3669_c	hyper_methylation
chr1@bin_842_w	hyper_methylation	Fer1l5
chr2@bin_1506_c	hyper_methylation
chr9@bin_967_c	hyper_methylation	Grik4
chr5@bin_2765_c	hyper_methylation
chr2@bin_6310_c	hyper_methylation
chr10@bin_3798_w	hyper_methylation	Kitl
chr5@bin_3610_c	hyper_methylation	Dtx1
chr12@bin_527_c	hyper_methylation
chr13@bin_3540_c	hyper_methylation
chr2@bin_6817_c	hyper_methylation
chr18@bin_2145_w	hyper_methylation
chr16@bin_424_c	hyper_methylation
chr18@bin_533_c	hyper_methylation
chr10@bin_4208_c	hyper_methylation
chr2@bin_3997_w	hyper_methylation
chr2@bin_5987_c	hyper_methylation	Spata2
chr4@bin_636_c	hyper_methylation
chr3@bin_2673_c	hyper_methylation	Cd160
chr6@bin_3090_c	hyper_methylation
chr1@bin_4404_c	hyper_methylation
chr6@bin_3449_c	hyper_methylation
chr9@bin_2391_w	hyper_methylation
chr11@bin_2365_c	hyper_methylation
chr17@bin_2492_w	hyper_methylation
chr5@bin_4920_c	hyper_methylation
chr13@bin_1656_c	hyper_methylation	Ror2
chr13@bin_4007_c	hyper_methylation
chr3@bin_1865_w	hyper_methylation
chr2@bin_1379_c	hyper_methylation
chr10@bin_1503_c	hyper_methylation	Edar
chr8@bin_2685_c	hyper_methylation
chr6@bin_2925_w	hyper_methylation	Kdm5a
chr1@bin_1128_c	hyper_methylation
chr18@bin_1524_c	hyper_methylation
chr4@bin_3528_c	hyper_methylation
chr1@bin_942_c	hyper_methylation	Tsga10
chr8@bin_4059_c	hyper_methylation
chr11@bin_5285_w	hyper_methylation
chr18@bin_1102_w	hyper_methylation	Arhgap26
chr10@bin_4289_w	hyper_methylation
chr7@bin_4790_w	hyper_methylation
chr1@bin_2806_c	hyper_methylation
chrX@bin_1200_c	hyper_methylation
chr8@bin_1620_c	hyper_methylation
chr1@bin_711_w	hyper_methylation	Dst
chr2@bin_1732_c	hyper_methylation
chr5@bin_4571_w	hyper_methylation	Upk3b
chr8@bin_3706_w	hyper_methylation	Cdh13
chr1@bin_5184_c	hyper_methylation	Atp1a2
chr14@bin_2209_w	hyper_methylation	Nuggc
chrX@bin_1559_w	hyper_methylation
chr10@bin_2046_c	hyper_methylation
chr2@bin_4859_c	hyper_methylation
chr4@bin_761_w	hyper_methylation
chr1@bin_2690_w	hyper_methylation	Scly,Espnl
chr1@bin_4624_w	hyper_methylation
chr6@bin_2720_c	hyper_methylation	Raf1
chr8@bin_2442_c	hyper_methylation	Zfp423
chr7@bin_3760_w	hyper_methylation
chr17@bin_983_c	hyper_methylation
chr5@bin_3625_w	hyper_methylation
chr7@bin_2142_c	hyper_methylation	Gabrg3
chr13@bin_2031_w	hyper_methylation
chr13@bin_1608_w	hyper_methylation
chr16@bin_2827_w	hyper_methylation
chr4@bin_3460_w	hyper_methylation	Rims3
chr6@bin_2946_c	hyper_methylation
chr5@bin_4121_c	hyper_methylation
chr10@bin_1247_w	hyper_methylation
chr15@bin_1689_c	hyper_methylation
chr16@bin_2624_c	hyper_methylation
chr7@bin_2705_c	hyper_methylation
chr2@bin_779_c	hyper_methylation
chr13@bin_3911_c	hyper_methylation
chr4@bin_82_w	hyper_methylation
chr10@bin_530_c	hyper_methylation	Myb
chr2@bin_3680_w	hyper_methylation
chr8@bin_3384_c	hyper_methylation	Adat1
chr5@bin_5551_c	hyper_methylation	Zar1l
chr7@bin_2304_w	hyper_methylation	Pcsk6
chr4@bin_4476_c	hyper_methylation
chr11@bin_6063_c	hyper_methylation
chr7@bin_2705_w	hyper_methylation
chr4@bin_2530_w	hyper_methylation
chr7@bin_3786_c	hyper_methylation
chr6@bin_2615_w	hyper_methylation	Creld1
chr19@bin_2397_c	hyper_methylation
chr5@bin_2374_c	hyper_methylation	4930429D17Rik
chr5@bin_2700_c	hyper_methylation
chr18@bin_2121_w	hyper_methylation
chr1@bin_1027_w	hyper_methylation	Npas2
chr1@bin_2506_w	hyper_methylation
chr4@bin_74_c	hyper_methylation
chr2@bin_4210_w	hyper_methylation	A730036I17Rik
chr4@bin_2591_c	hyper_methylation
chr5@bin_1979_c	hyper_methylation
chr13@bin_1589_w	hyper_methylation
chr3@bin_4144_c	hyper_methylation
chr1@bin_812_w	hyper_methylation	Hs6st1
chr9@bin_1261_c	hyper_methylation
chr19@bin_2420_w	hyper_methylation	Vti1a
chr12@bin_3197_w	hyper_methylation
chr9@bin_1512_w	hyper_methylation
chr19@bin_646_c	hyper_methylation
chr7@bin_1344_w	hyper_methylation
chr19@bin_2352_c	hyper_methylation	AK019949,Mirt1
chr9@bin_1874_w	hyper_methylation	Anp32a
chr1@bin_791_w	hyper_methylation
chr11@bin_1742_c	hyper_methylation
chr11@bin_3892_c	hyper_methylation	Ngfr
chr4@bin_6449_c	hyper_methylation	Prdm16
chr7@bin_1334_w	hyper_methylation	Pepd
chr7@bin_3021_w	hyper_methylation
chr18@bin_1375_c	hyper_methylation
chr1@bin_2798_c	hyper_methylation	Kif1a
chr15@bin_1817_c	hyper_methylation
chr15@bin_885_w	hyper_methylation
chr15@bin_3842_c	hyper_methylation	Lima1
chr13@bin_3104_c	hyper_methylation
chr14@bin_2831_w	hyper_methylation
chr2@bin_1385_c	hyper_methylation
chr5@bin_1449_c	hyper_methylation	Apbb2
chr4@bin_6276_c	hyper_methylation
chr9@bin_684_c	hyper_methylation
chr11@bin_4806_c	hyper_methylation
chr12@bin_2680_w	hyper_methylation	Adck1
chr2@bin_4166_c	hyper_methylation	Gm14005
chr15@bin_4004_c	hyper_methylation	Krt80
chr3@bin_1272_w	hyper_methylation
chr6@bin_2335_w	hyper_methylation
chr2@bin_6234_c	hyper_methylation
chr10@bin_348_c	hyper_methylation
chr13@bin_137_c	hyper_methylation
chr11@bin_5325_w	hyper_methylation
chr8@bin_3875_c	hyper_methylation
chr3@bin_2993_c	hyper_methylation
chr13@bin_2280_c	hyper_methylation	Ptch1
chr17@bin_3159_w	hyper_methylation
chr10@bin_1237_w	hyper_methylation	Prep
chr11@bin_975_w	hyper_methylation
chr1@bin_5912_c	hyper_methylation
chr8@bin_4097_c	hyper_methylation
chr1@bin_3691_w	hyper_methylation
chr14@bin_1213_c	hyper_methylation
chr13@bin_1336_w	hyper_methylation
chr10@bin_3157_w	hyper_methylation	Chst11
chr4@bin_1217_c	hyper_methylation	Trim14
chr11@bin_4539_w	hyper_methylation	Nbr1
chr15@bin_1667_w	hyper_methylation
chr18@bin_1519_c	hyper_methylation
chr1@bin_3739_w	hyper_methylation	Ppp1r15b
chr13@bin_1816_c	hyper_methylation	Lman2
chr2@bin_2970_c	hyper_methylation	F2
chr11@bin_533_c	hyper_methylation
chr2@bin_2124_c	hyper_methylation
chr17@bin_3800_w	hyper_methylation
chr17@bin_183_w	hyper_methylation
chr8@bin_2491_w	hyper_methylation	Nkd1
chr9@bin_597_w	hyper_methylation
chr4@bin_5031_w	hyper_methylation	Kif17
chr4@bin_4847_w	hyper_methylation
chr3@bin_282_c	hyper_methylation
chr3@bin_1794_w	hyper_methylation	Gm20754
chr4@bin_4388_c	hyper_methylation
chr11@bin_57_c	hyper_methylation	Osbp2
chr3@bin_1402_w	hyper_methylation
chr7@bin_3904_c	hyper_methylation
chr3@bin_2038_c	hyper_methylation	Arfip1
chr13@bin_1064_w	hyper_methylation	Hivep1
chr19@bin_1096_c	hyper_methylation
chr6@bin_1076_w	hyper_methylation	C530044C16Rik
chr4@bin_5031_c	hyper_methylation
chr13@bin_1003_w	hyper_methylation	Gcnt2
chr3@bin_2177_w	hyper_methylation
chr13@bin_282_c	hyper_methylation
chr11@bin_4915_c	hyper_methylation	Strada
chr13@bin_2770_w	hyper_methylation
chr2@bin_672_c	hyper_methylation
chr9@bin_3872_w	hyper_methylation	Ctdspl
chr14@bin_2139_w	hyper_methylation
chr2@bin_6216_w	hyper_methylation
chr1@bin_3748_c	hyper_methylation
chr10@bin_554_c	hyper_methylation
chr2@bin_253_c	hyper_methylation
chr17@bin_89_w	hyper_methylation	Snx9
chr3@bin_2917_c	hyper_methylation
chr18@bin_411_w	hyper_methylation
chr7@bin_2361_w	hyper_methylation	Adamts17
chr1@bin_4142_c	hyper_methylation	Gm4788
chr8@bin_3292_c	hyper_methylation
chr5@bin_2354_c	hyper_methylation
chr7@bin_363_w	hyper_methylation
chr1@bin_1663_w	hyper_methylation	Ino80dos
chr11@bin_1813_c	hyper_methylation
chr2@bin_1032_w	hyper_methylation	Usp20
chr5@bin_492_w	hyper_methylation
chr15@bin_1439_c	hyper_methylation
chr1@bin_5434_c	hyper_methylation	Adck3
chr7@bin_4706_c	hyper_methylation
chr2@bin_3747_w	hyper_methylation
chr6@bin_3465_c	hyper_methylation	AK016696
chr12@bin_3193_c	hyper_methylation
chr3@bin_1580_w	hyper_methylation
chr9@bin_1161_w	hyper_methylation	Dscaml1
chr15@bin_1835_c	hyper_methylation
chr3@bin_1192_c	hyper_methylation
chr5@bin_455_w	hyper_methylation
chr5@bin_2541_c	hyper_methylation	Tgfbr3
chr2@bin_2356_c	hyper_methylation	AK079188
chr2@bin_6747_w	hyper_methylation	Cdh4
chr16@bin_2666_c	hyper_methylation
chr2@bin_5799_c	hyper_methylation	Zmynd8
chr3@bin_2344_w	hyper_methylation
chr5@bin_5180_w	hyper_methylation	Bri3
chr1@bin_1215_w	hyper_methylation	Col3a1
chr10@bin_1859_c	hyper_methylation	Tet1
chr11@bin_1168_w	hyper_methylation	Gabrb2
chr11@bin_3223_w	hyper_methylation
chr8@bin_517_w	hyper_methylation	Mcph1
chr14@bin_460_w	hyper_methylation	Adk
chr17@bin_3326_c	hyper_methylation
chr9@bin_1542_c	hyper_methylation
chr17@bin_2469_c	hyper_methylation
chr9@bin_1108_w	hyper_methylation
chr15@bin_1344_c	hyper_methylation
chr1@bin_5313_w	hyper_methylation	Sdccag8
chr11@bin_6246_w	hyper_methylation
chr3@bin_3361_c	hyper_methylation	Mfsd14a
chr19@bin_2102_c	hyper_methylation	Cyp17a1
chr11@bin_3221_c	hyper_methylation	Asic2
chr10@bin_3131_c	hyper_methylation
chr5@bin_861_c	hyper_methylation
chr2@bin_3796_w	hyper_methylation
chr14@bin_3451_c	hyper_methylation
chr4@bin_3756_c	hyper_methylation
chr12@bin_281_w	hyper_methylation
chr10@bin_2752_c	hyper_methylation
chr13@bin_3571_w	hyper_methylation
chr19@bin_2550_w	hyper_methylation
chr5@bin_5527_w	hyper_methylation	Fry
chr4@bin_5277_w	hyper_methylation
chrX@bin_145_w	hyper_methylation
chr12@bin_3073_c	hyper_methylation
chr2@bin_3101_w	hyper_methylation
chr1@bin_1048_w	hyper_methylation
chr3@bin_1079_w	hyper_methylation
chr11@bin_1876_c	hyper_methylation	Obscn
chr18@bin_1915_c	hyper_methylation
chr19@bin_2642_w	hyper_methylation
chr18@bin_2329_w	hyper_methylation	Gm10532
chr19@bin_1760_c	hyper_methylation
chr10@bin_2737_c	hyper_methylation
chr9@bin_896_c	hyper_methylation	Ubash3b
chr19@bin_1923_c	hyper_methylation
chr7@bin_2471_w	hyper_methylation
chr13@bin_204_w	hyper_methylation
chr17@bin_3892_w	hyper_methylation
chr1@bin_2774_w	hyper_methylation
chr11@bin_5071_c	hyper_methylation
chr11@bin_5697_c	hyper_methylation	Mxra7
chr9@bin_522_w	hyper_methylation
chr17@bin_1918_w	hyper_methylation
chrX@bin_669_w	hyper_methylation
chr8@bin_4056_w	hyper_methylation
chr8@bin_4327_c	hyper_methylation
chr4@bin_1126_c	hyper_methylation
chr4@bin_2312_w	hyper_methylation	Gm12610
chr2@bin_1347_c	hyper_methylation	AK162388
chr5@bin_1330_w	hyper_methylation
chr7@bin_2006_w	hyper_methylation	Nav2
chr9@bin_1576_w	hyper_methylation
chr17@bin_3610_w	hyper_methylation
chr17@bin_2400_w	hyper_methylation	Trerf1
chrX@bin_356_c	hyper_methylation
chr4@bin_1041_w	hyper_methylation
chr6@bin_3178_w	hyper_methylation
chr15@bin_3989_w	hyper_methylation	Grasp
chr1@bin_3384_c	hyper_methylation
chr19@bin_1193_w	hyper_methylation
chr7@bin_4863_c	hyper_methylation
chr11@bin_2900_c	hyper_methylation	Abr
chr1@bin_540_c	hyper_methylation	Adgrb3
chr2@bin_4567_w	hyper_methylation
chr1@bin_4578_c	hyper_methylation
chr2@bin_3362_c	hyper_methylation
chr4@bin_5338_c	hyper_methylation	Padi1
chr12@bin_3306_c	hyper_methylation	1700121N20Rik
chrX@bin_219_w	hyper_methylation
chr4@bin_2165_c	hyper_methylation
chr7@bin_1086_w	hyper_methylation
chr4@bin_5017_c	hyper_methylation
chr16@bin_2844_w	hyper_methylation	Sim2
chr2@bin_5456_c	hyper_methylation	Ptprt
chr12@bin_1040_c	hyper_methylation
chr10@bin_1224_w	hyper_methylation
chr2@bin_5279_w	hyper_methylation	Ctnnbl1
chr19@bin_963_c	hyper_methylation
chr18@bin_306_c	hyper_methylation	Zfp521
chr11@bin_5361_w	hyper_methylation
chr5@bin_652_w	hyper_methylation
chr9@bin_3157_c	hyper_methylation	Tmem108
chr14@bin_1641_w	hyper_methylation
chr17@bin_1564_c	hyper_methylation
chr10@bin_264_w	hyper_methylation
chr1@bin_2125_w	hyper_methylation
chr2@bin_2082_w	hyper_methylation
chr6@bin_2155_w	hyper_methylation
chr8@bin_3347_w	hyper_methylation
chr7@bin_169_w	hyper_methylation	Usp29
chr14@bin_2290_c	hyper_methylation
chr9@bin_4073_c	hyper_methylation
chr5@bin_4253_w	hyper_methylation	Mmp17
chr13@bin_3636_c	hyper_methylation
chr2@bin_1343_w	hyper_methylation
chr11@bin_5950_w	hyper_methylation
chr16@bin_1062_c	hyper_methylation
chr11@bin_4974_w	hyper_methylation
chr12@bin_2702_c	hyper_methylation
chr16@bin_2696_w	hyper_methylation
chr19@bin_71_w	hyper_methylation	Pitpnm1
chr13@bin_2345_w	hyper_methylation
chr8@bin_2304_c	hyper_methylation	Nfix
chr1@bin_1704_c	hyper_methylation
chr2@bin_2123_w	hyper_methylation
chr15@bin_2879_w	hyper_methylation
chr5@bin_4347_w	hyper_methylation
chr5@bin_3442_w	hyper_methylation
chr17@bin_171_w	hyper_methylation
chr18@bin_1290_c	hyper_methylation
chr10@bin_1201_c	hyper_methylation
chr4@bin_1770_w	hyper_methylation
chr4@bin_3292_c	hyper_methylation	Ptprf,Mir7226
chr11@bin_1586_w	hyper_methylation	Fstl4
chr17@bin_3883_w	hyper_methylation	Camkmt
chr2@bin_2533_c	hyper_methylation
chr4@bin_4527_c	hyper_methylation
chr4@bin_2135_w	hyper_methylation
chr6@bin_2112_c	hyper_methylation	Iqsec1
chr1@bin_5122_w	hyper_methylation	Pfdn2
chr6@bin_2417_c	hyper_methylation
chr15@bin_3439_w	hyper_methylation
chr10@bin_938_w	hyper_methylation
chr1@bin_1625_w	hyper_methylation
chr8@bin_2202_w	hyper_methylation
chr6@bin_3156_w	hyper_methylation	Vamp1
chr4@bin_4123_w	hyper_methylation	Adgrb2
chr14@bin_3484_w	hyper_methylation	1700044C05Rik
chr2@bin_5293_c	hyper_methylation
chr16@bin_1015_w	hyper_methylation
chrX@bin_2098_w	hyper_methylation
chr7@bin_2236_c	hyper_methylation
chr19@bin_1996_c	hyper_methylation
chr4@bin_4039_c	hyper_methylation	C77080
chr16@bin_684_c	hyper_methylation
chr7@bin_111_c	hyper_methylation	Zfp579
chr12@bin_3038_w	hyper_methylation
chr6@bin_897_c	hyper_methylation
chr13@bin_1985_c	hyper_methylation
chr11@bin_4560_w	hyper_methylation
chr13@bin_1247_c	hyper_methylation
chr4@bin_3759_c	hyper_methylation
chr9@bin_3076_c	hyper_methylation	Ephb1
chr15@bin_893_c	hyper_methylation
chr8@bin_536_c	hyper_methylation
chr2@bin_1081_c	hyper_methylation
chr13@bin_2965_w	hyper_methylation
chr8@bin_3449_w	hyper_methylation	Wwox
chr1@bin_1135_c	hyper_methylation
chr17@bin_2823_c	hyper_methylation	Plin3
chr17@bin_4031_w	hyper_methylation
chr7@bin_25_c	hyper_methylation
chr15@bin_1841_c	hyper_methylation
chr4@bin_4365_w	hyper_methylation
chr6@bin_3560_w	hyper_methylation
chr3@bin_973_c	hyper_methylation
chr14@bin_1173_w	hyper_methylation
chr2@bin_3129_c	hyper_methylation
chr11@bin_4307_c	hyper_methylation
chr17@bin_1789_c	hyper_methylation
chr18@bin_1684_c	hyper_methylation
chr15@bin_693_w	hyper_methylation
chr15@bin_2376_w	hyper_methylation
chr5@bin_1637_w	hyper_methylation
chr18@bin_30_w	hyper_methylation
chr3@bin_2161_c	hyper_methylation	Bcan
chr8@bin_1575_w	hyper_methylation
chr13@bin_3032_w	hyper_methylation
chr13@bin_3736_w	hyper_methylation
chrX@bin_2010_c	hyper_methylation	Esx1
chr5@bin_999_c	hyper_methylation
chr5@bin_3467_w	hyper_methylation
chr4@bin_5062_c	hyper_methylation
chr7@bin_3222_w	hyper_methylation
chr10@bin_4665_w	hyper_methylation	B4galnt1
chr5@bin_444_c	hyper_methylation
chr13@bin_1522_c	hyper_methylation
chr5@bin_2805_w	hyper_methylation
chr1@bin_818_c	hyper_methylation	Uggt1
chr11@bin_3008_w	hyper_methylation	Flot2
chr3@bin_825_w	hyper_methylation
chr4@bin_290_c	hyper_methylation	Necab1
chr11@bin_3838_c	hyper_methylation	Itga3
chr15@bin_3223_c	hyper_methylation
chr2@bin_1066_w	hyper_methylation
chr11@bin_4955_w	hyper_methylation
chr17@bin_1605_w	hyper_methylation
chr10@bin_4301_w	hyper_methylation
chr4@bin_3657_w	hyper_methylation	Inpp5b
chr10@bin_4303_c	hyper_methylation
chr4@bin_5583_c	hyper_methylation
chr10@bin_4727_c	hyper_methylation	Lrp1
chr15@bin_1982_w	hyper_methylation
chr16@bin_13_w	hyper_methylation
chr5@bin_5286_c	hyper_methylation
chrX@bin_486_w	hyper_methylation
chr3@bin_4512_c	hyper_methylation
chr6@bin_3066_w	hyper_methylation
chr17@bin_2727_c	hyper_methylation
chr11@bin_3912_c	hyper_methylation	Abi3
chr2@bin_540_w	hyper_methylation
chr2@bin_5013_c	hyper_methylation
chr2@bin_5300_w	hyper_methylation
chr4@bin_5784_w	hyper_methylation	Exosc10
chr15@bin_3223_w	hyper_methylation
chr2@bin_769_c	hyper_methylation
chr13@bin_2125_w	hyper_methylation
chr9@bin_2752_w	hyper_methylation	4930524O08Rik
chr14@bin_504_c	hyper_methylation
chr5@bin_2328_w	hyper_methylation	Cds1
chr11@bin_5290_w	hyper_methylation
chr17@bin_454_w	hyper_methylation
chr7@bin_4139_c	hyper_methylation
chr11@bin_228_c	hyper_methylation	Camk2b
chr3@bin_2298_c	hyper_methylation	Dcst1
chrX@bin_1077_w	hyper_methylation
chr17@bin_1728_w	hyper_methylation	Tnxb
chr11@bin_2074_w	hyper_methylation
chr8@bin_666_w	hyper_methylation	Zmat4
chr7@bin_3937_w	hyper_methylation	Scnn1g
chr4@bin_1096_w	hyper_methylation	Grhpr
chr8@bin_1483_w	hyper_methylation
chr7@bin_4422_c	hyper_methylation
chr9@bin_4039_c	hyper_methylation
chr12@bin_1875_w	hyper_methylation
chrX@bin_2403_c	hyper_methylation	Reps2
chr2@bin_1473_w	hyper_methylation
chr10@bin_3824_w	hyper_methylation	Mgat4c
chr11@bin_4877_c	hyper_methylation	2018-03-10
chr1@bin_3885_c	hyper_methylation	Ppp1r12b
chr5@bin_1298_c	hyper_methylation	Arap2
chrX@bin_805_c	hyper_methylation	Gpr101
chr16@bin_2642_w	hyper_methylation	Ifnar2
chr6@bin_417_w	hyper_methylation	Snd1
chr1@bin_1550_c	hyper_methylation
chr1@bin_3505_c	hyper_methylation
chr12@bin_2203_w	hyper_methylation
chr13@bin_3844_w	hyper_methylation
chr1@bin_4860_c	hyper_methylation
chr6@bin_820_c	hyper_methylation	Dennd2a
chr5@bin_3561_c	hyper_methylation
chr1@bin_3937_c	hyper_methylation	Nav1
chr2@bin_6305_w	hyper_methylation
chr4@bin_1343_w	hyper_methylation
chr3@bin_4107_c	hyper_methylation
chr5@bin_1430_w	hyper_methylation
chr2@bin_5460_c	hyper_methylation	Ptprt
chr16@bin_390_w	hyper_methylation
chr9@bin_213_w	hyper_methylation
chr19@bin_627_c	hyper_methylation
chr8@bin_2279_w	hyper_methylation	Cacna1a
chr17@bin_1951_c	hyper_methylation
chr14@bin_2271_c	hyper_methylation
chr18@bin_618_w	hyper_methylation
chr14@bin_2789_w	hyper_methylation	Olfm4
chr1@bin_1054_w	hyper_methylation
chr4@bin_1646_w	hyper_methylation
chr1@bin_4472_c	hyper_methylation	Rgsl1
chr12@bin_1581_w	hyper_methylation
chr12@bin_3579_w	hyper_methylation	Dync1h1
chr17@bin_1753_c	hyper_methylation	C2
chr16@bin_630_c	hyper_methylation
chr2@bin_3207_c	hyper_methylation
chr9@bin_2086_c	hyper_methylation
chr15@bin_2224_w	hyper_methylation
chr14@bin_1092_c	hyper_methylation
chr12@bin_1356_w	hyper_methylation	Npas3
chr5@bin_5092_c	hyper_methylation
chr11@bin_3111_w	hyper_methylation	Rab11fip4
chr15@bin_1300_c	hyper_methylation	AK035950,Ext1
chr17@bin_62_w	hyper_methylation	Arid1b
chrX@bin_1523_c	hyper_methylation
chr16@bin_1318_c	hyper_methylation
chr16@bin_2978_w	hyper_methylation
chr2@bin_524_c	hyper_methylation	Cacna1b
chr2@bin_5831_c	hyper_methylation
chr2@bin_3673_w	hyper_methylation
chr17@bin_1492_w	hyper_methylation	Slc37a1
chr6@bin_1858_w	hyper_methylation
chr14@bin_689_c	hyper_methylation
chr10@bin_3044_c	hyper_methylation	4930404N11Rik,AK201601,Fzr1
chr13@bin_3171_w	hyper_methylation
chr3@bin_1568_w	hyper_methylation
chr2@bin_5510_w	hyper_methylation	Sgk2
chr8@bin_2589_c	hyper_methylation
chr8@bin_1638_c	hyper_methylation
chr1@bin_5210_w	hyper_methylation	Igsf9
chr10@bin_3323_w	hyper_methylation	Ttc41
chr2@bin_4523_c	hyper_methylation
chr16@bin_2915_c	hyper_methylation	Erg
chr17@bin_1536_c	hyper_methylation	AK048349,Sik1
chr10@bin_2552_w	hyper_methylation
chr3@bin_524_w	hyper_methylation
chr11@bin_3546_c	hyper_methylation
chr13@bin_2136_w	hyper_methylation
chr6@bin_162_c	hyper_methylation
chr2@bin_6446_w	hyper_methylation
chr10@bin_2327_c	hyper_methylation
chr6@bin_1811_w	hyper_methylation	Ankrd53
chr7@bin_3371_w	hyper_methylation
chr2@bin_2393_w	hyper_methylation
chr11@bin_5440_c	hyper_methylation
chr2@bin_5439_c	hyper_methylation
chr16@bin_1247_c	hyper_methylation	Kalrn
chr11@bin_5333_c	hyper_methylation	Sdk2
chr16@bin_219_c	hyper_methylation
chr18@bin_2751_w	hyper_methylation	Zfp516
chr16@bin_225_w	hyper_methylation
chr14@bin_2588_c	hyper_methylation
chr4@bin_1665_w	hyper_methylation	Ugcg
chr10@bin_2327_w	hyper_methylation
chr17@bin_129_c	hyper_methylation	Ezr
chr12@bin_815_w	hyper_methylation
chr4@bin_6241_w	hyper_methylation
chr1@bin_4209_w	hyper_methylation
chr16@bin_1183_c	hyper_methylation
chr5@bin_520_w	hyper_methylation
chr9@bin_651_c	hyper_methylation
chrX@bin_790_c	hyper_methylation
chr10@bin_4475_w	hyper_methylation
chrX@bin_2115_c	hyper_methylation
chr15@bin_287_c	hyper_methylation
chr4@bin_2274_c	hyper_methylation
chr11@bin_2437_w	hyper_methylation
chr14@bin_1419_w	hyper_methylation	Peli2
chr19@bin_1509_c	hyper_methylation
chr17@bin_1393_c	hyper_methylation	Mdga1
chrX@bin_2093_c	hyper_methylation
chr11@bin_3366_c	hyper_methylation
chr12@bin_1212_w	hyper_methylation
chrX@bin_1482_w	hyper_methylation
chr16@bin_1069_c	hyper_methylation
chr17@bin_2568_c	hyper_methylation
chr6@bin_1282_w	hyper_methylation
chr10@bin_3425_c	hyper_methylation
chr5@bin_561_w	hyper_methylation	Agbl5
chr2@bin_4681_w	hyper_methylation
chrX@bin_2461_c	hyper_methylation
chr7@bin_1710_c	hyper_methylation	Ptov1
chr16@bin_2098_w	hyper_methylation	Gbe1
chr4@bin_4888_c	hyper_methylation
chr15@bin_2397_w	hyper_methylation
chr11@bin_3205_w	hyper_methylation
chr11@bin_5059_w	hyper_methylation	Cep112
chr10@bin_2572_w	hyper_methylation	Itgb2
chr4@bin_1349_w	hyper_methylation
chr15@bin_3261_c	hyper_methylation
chr7@bin_1712_c	hyper_methylation
chr11@bin_4208_c	hyper_methylation
chr7@bin_991_c	hyper_methylation
chr19@bin_1971_w	hyper_methylation
chr10@bin_1458_c	hyper_methylation
chrX@bin_689_c	hyper_methylation
chr17@bin_3964_c	hyper_methylation
chr13@bin_3446_w	hyper_methylation	4933416M06Rik
chr4@bin_4792_w	hyper_methylation	Zfp46
chr8@bin_3370_c	hyper_methylation	Cfdp1
chr17@bin_1864_w	hyper_methylation
chr6@bin_3426_w	hyper_methylation
chr11@bin_4324_w	hyper_methylation
chrX@bin_2504_w	hyper_methylation	Arhgap6
chrX@bin_2506_c	hyper_methylation	Hccs
chr8@bin_3153_w	hyper_methylation
chr18@bin_1800_c	hyper_methylation
chr13@bin_1761_w	hyper_methylation
chr6@bin_3457_w	hyper_methylation	Etv6
chrX@bin_713_c	hyper_methylation
chr10@bin_2568_w	hyper_methylation
chr7@bin_3657_c	hyper_methylation
chr5@bin_159_w	hyper_methylation
chr16@bin_2687_c	hyper_methylation
chr10@bin_131_c	hyper_methylation	Cnksr3
chr8@bin_3823_w	hyper_methylation
chr3@bin_2633_c	hyper_methylation
chr9@bin_959_w	hyper_methylation
chr15@bin_1385_w	hyper_methylation
chr14@bin_1853_c	hyper_methylation
chr10@bin_133_w	hyper_methylation
chr17@bin_491_c	hyper_methylation
chr2@bin_543_w	hyper_methylation
chr2@bin_3175_c	hyper_methylation
chr4@bin_2718_c	hyper_methylation
chr13@bin_2118_c	hyper_methylation
chr10@bin_2459_w	hyper_methylation	S100b
chr4@bin_1547_w	hyper_methylation
chr1@bin_210_w	hyper_methylation
chr1@bin_4389_c	hyper_methylation	Rgl1
chr4@bin_4753_c	hyper_methylation	Lypla2
chr4@bin_381_c	hyper_methylation	Atp6v0d2
chr12@bin_528_c	hyper_methylation
chr11@bin_3859_c	hyper_methylation
chr10@bin_3836_w	hyper_methylation
chr18@bin_2755_w	hyper_methylation	Zfp516
chr9@bin_544_w	hyper_methylation
chr6@bin_1106_c	hyper_methylation
chrX@bin_1353_w	hyper_methylation
chr17@bin_3042_w	hyper_methylation
chr14@bin_1307_c	hyper_methylation
chr8@bin_1207_c	hyper_methylation
chr11@bin_2664_w	hyper_methylation
chr4@bin_5920_c	hyper_methylation
chr12@bin_2318_c	hyper_methylation
chr8@bin_1794_c	hyper_methylation
chr13@bin_3530_w	hyper_methylation	Sgtb
chr4@bin_193_w	hyper_methylation
chr18@bin_2913_w	hyper_methylation
chr4@bin_3111_c	hyper_methylation
chr1@bin_4071_c	hyper_methylation
chrX@bin_345_c	hyper_methylation
chr4@bin_60_w	hyper_methylation
chr18@bin_2522_w	hyper_methylation
chr7@bin_4346_c	hyper_methylation
chr4@bin_3274_c	hyper_methylation	St3gal3
chr11@bin_144_w	hyper_methylation	Thoc5
chr10@bin_4117_c	hyper_methylation
chr13@bin_2093_c	hyper_methylation
chr17@bin_2493_c	hyper_methylation
chr19@bin_599_w	hyper_methylation
chr6@bin_1910_c	hyper_methylation
chr2@bin_4550_c	hyper_methylation
chr4@bin_4954_c	hyper_methylation
chr7@bin_704_w	hyper_methylation
chr11@bin_560_c	hyper_methylation
chr12@bin_600_w	hyper_methylation
chr1@bin_3015_c	hyper_methylation
chr9@bin_1010_c	hyper_methylation
chr13@bin_1234_c	hyper_methylation	Atxn1
chr1@bin_4963_w	hyper_methylation
chr3@bin_2029_w	hyper_methylation
chr19@bin_1166_c	hyper_methylation	Glis3
chr12@bin_298_c	hyper_methylation
chr17@bin_3683_w	hyper_methylation
chr5@bin_5092_w	hyper_methylation
chr2@bin_5009_w	hyper_methylation
chr7@bin_3852_w	hyper_methylation
chr5@bin_4314_w	hyper_methylation	Caln1
chr3@bin_2872_w	hyper_methylation
chr7@bin_2932_w	hyper_methylation
chr18@bin_1199_w	hyper_methylation
chr3@bin_4487_w	hyper_methylation	Slc44a5
chr17@bin_425_c	hyper_methylation
chr19@bin_515_c	hyper_methylation
chr10@bin_4336_w	hyper_methylation	Grip1
chr6@bin_3744_w	hyper_methylation
chr7@bin_111_w	hyper_methylation
chr15@bin_1628_c	hyper_methylation	Adcy8
chr10@bin_235_w	hyper_methylation
chr17@bin_2502_c	hyper_methylation
chrX@bin_2423_c	hyper_methylation	Car5b
chr15@bin_3830_w	hyper_methylation	Asic1
chr9@bin_744_c	hyper_methylation	Ddx25
chr5@bin_2017_c	hyper_methylation
chr9@bin_3616_c	hyper_methylation
chr18@bin_709_w	hyper_methylation
chr10@bin_2620_w	hyper_methylation
chr7@bin_4905_c	hyper_methylation
chr15@bin_1235_w	hyper_methylation
chr6@bin_2930_c	hyper_methylation	Cecr6
chr5@bin_2983_w	hyper_methylation
chr3@bin_2638_w	hyper_methylation
chr7@bin_4260_c	hyper_methylation
chr6@bin_2932_c	hyper_methylation
chr15@bin_2510_w	hyper_methylation
chr9@bin_1175_w	hyper_methylation	Dscaml1
chr15@bin_2556_w	hyper_methylation
chr9@bin_3105_c	hyper_methylation
chr4@bin_6539_w	hyper_methylation
chr19@bin_495_c	hyper_methylation
chr15@bin_3014_c	hyper_methylation
chr12@bin_2948_c	hyper_methylation	Ttc7b
chr3@bin_4292_w	hyper_methylation
chr1@bin_5747_w	hyper_methylation
chr4@bin_3417_w	hyper_methylation	Hivep3
chr11@bin_2164_w	hypo_methylation
chr11@bin_3665_w	hypo_methylation
chr11@bin_605_w	hypo_methylation	Spred2
chr10@bin_359_w	hypo_methylation
chr13@bin_394_w	hypo_methylation	Elmo1
chr19@bin_2114_w	hypo_methylation
chr14@bin_2543_c	hypo_methylation
chr7@bin_3360_c	hypo_methylation
chr13@bin_4002_c	hypo_methylation
chr12@bin_2080_w	hypo_methylation
chr9@bin_2578_c	hypo_methylation
chr15@bin_237_w	hypo_methylation
chr1@bin_2004_w	hypo_methylation	Wnt10a
chr6@bin_238_w	hypo_methylation
chr17@bin_749_w	hypo_methylation	Bricd5,Pgp
chr15@bin_258_c	hypo_methylation	Tars
chr1@bin_4964_c	hypo_methylation
chr2@bin_4641_w	hypo_methylation	Slc24a3
chr11@bin_3596_c	hypo_methylation	Msi2
chr16@bin_2645_c	hypo_methylation
chr10@bin_3517_w	hypo_methylation
chr7@bin_3360_w	hypo_methylation	Pde2a
chr6@bin_1416_w	hypo_methylation
chr14@bin_1932_c	hypo_methylation	Setdb2-phf11c
chr9@bin_654_w	hypo_methylation
chr5@bin_1989_w	hypo_methylation
chr5@bin_2792_c	hypo_methylation	Gm6583
chr10@bin_1957_c	hypo_methylation
chr19@bin_180_c	hypo_methylation
chr8@bin_2334_c	hypo_methylation	Rnaseh2a
chr7@bin_984_c	hypo_methylation	Pak4
chr18@bin_436_c	hypo_methylation	Dsc3
chr15@bin_1463_c	hypo_methylation
chr8@bin_2523_w	hypo_methylation
chr2@bin_5034_c	hypo_methylation
chr3@bin_3940_c	hypo_methylation	Nfkb1
chr2@bin_5315_w	hypo_methylation	Bpi
chr4@bin_3629_w	hypo_methylation
chr1@bin_5732_c	hypo_methylation	Mark1
chr10@bin_2785_w	hypo_methylation	Abca7
chr14@bin_1710_w	hypo_methylation
chr1@bin_4907_c	hypo_methylation
chr7@bin_173_c	hypo_methylation
chr10@bin_1929_c	hypo_methylation
chr2@bin_4822_w	hypo_methylation
chr7@bin_3674_c	hypo_methylation
chr2@bin_581_w	hypo_methylation
chr15@bin_2223_c	hypo_methylation	C1qtnf6
chrX@bin_1064_w	hypo_methylation	Vbp1
chr2@bin_522_w	hypo_methylation
chr11@bin_905_w	hypo_methylation
chr5@bin_2749_c	hypo_methylation
chr2@bin_5443_c	hypo_methylation
chr10@bin_3786_c	hypo_methylation
chr8@bin_4354_c	hypo_methylation
chr18@bin_1975_w	hypo_methylation
chr18@bin_720_c	hypo_methylation
chr11@bin_4520_c	hypo_methylation
chr9@bin_1355_w	hypo_methylation
chr10@bin_340_w	hypo_methylation
chr10@bin_656_w	hypo_methylation
chr10@bin_1700_c	hypo_methylation	Adamts14
chr2@bin_3914_w	hypo_methylation
chr4@bin_2038_c	hypo_methylation	Ptprd
chr14@bin_890_w	hypo_methylation	Btd
chr11@bin_3643_c	hypo_methylation
chr9@bin_1569_w	hypo_methylation	Cspg4
chr7@bin_339_w	hypo_methylation
chr16@bin_1152_c	hypo_methylation
chrX@bin_1963_w	hypo_methylation	Armcx4
chr5@bin_1382_c	hypo_methylation
chr4@bin_654_w	hypo_methylation
chr8@bin_968_c	hypo_methylation	B930018H19Rik
chr2@bin_4708_c	hypo_methylation
chr2@bin_5689_w	hypo_methylation
chr8@bin_2092_w	hypo_methylation
chr2@bin_5354_c	hypo_methylation
chr9@bin_978_w	hypo_methylation
chr7@bin_3670_w	hypo_methylation
chr8@bin_3888_w	hypo_methylation	Gse1
chr6@bin_1344_c	hypo_methylation	Nap1l5
chr2@bin_3031_c	hypo_methylation	Mapk8ip1
chr19@bin_2600_w	hypo_methylation	Atrnl1
chr8@bin_2092_c	hypo_methylation	Smad1
chr5@bin_1435_w	hypo_methylation
chr3@bin_1371_w	hypo_methylation
chr4@bin_654_c	hypo_methylation	Ankrd6
chr18@bin_2250_c	hypo_methylation
chr7@bin_2025_c	hypo_methylation
chr2@bin_3507_c	hypo_methylation
chr3@bin_1363_c	hypo_methylation
chr10@bin_274_c	hypo_methylation	Utrn
chr8@bin_4162_w	hypo_methylation
chr11@bin_4095_c	hypo_methylation
chr1@bin_5142_c	hypo_methylation
chr8@bin_393_w	hypo_methylation
chr10@bin_1945_c	hypo_methylation
chr2@bin_6129_c	hypo_methylation	Nfatc2
chr1@bin_2630_w	hypo_methylation
chr5@bin_5220_c	hypo_methylation	Gm4871
chrX@bin_2403_w	hypo_methylation
chr8@bin_4158_w	hypo_methylation	AK040202
chr9@bin_3143_w	hypo_methylation	Topbp1
chr13@bin_4002_w	hypo_methylation	Gm7120
chr8@bin_2509_c	hypo_methylation
chr13@bin_1948_c	hypo_methylation
chr2@bin_5048_w	hypo_methylation	Raly
chr4@bin_5141_w	hypo_methylation	Capzb
chr13@bin_1512_w	hypo_methylation
chr1@bin_1905_w	hypo_methylation	AK048274
chr3@bin_2738_c	hypo_methylation
chr12@bin_937_w	hypo_methylation	Atxn7l1
chr11@bin_4079_w	hypo_methylation
chr9@bin_2885_w	hypo_methylation
chr19@bin_1768_w	hypo_methylation
chr6@bin_1495_w	hypo_methylation
chr10@bin_1717_c	hypo_methylation
chr1@bin_4952_w	hypo_methylation	Aldh9a1
chr2@bin_5440_c	hypo_methylation	Chd6
chr17@bin_2502_w	hypo_methylation
chr3@bin_1695_c	hypo_methylation
chr1@bin_1880_w	hypo_methylation
chr12@bin_3257_w	hypo_methylation	Ak7
chr10@bin_1052_w	hypo_methylation
chr1@bin_1478_w	hypo_methylation
chr19@bin_438_w	hypo_methylation
chr4@bin_5223_w	hypo_methylation
chr15@bin_2671_w	hypo_methylation
chr1@bin_1712_c	hypo_methylation	Plekhm3
chr9@bin_495_w	hypo_methylation
chr1@bin_2009_w	hypo_methylation
chr13@bin_2213_w	hypo_methylation
chr5@bin_4290_w	hypo_methylation	Kctd7
chr10@bin_1134_w	hypo_methylation	Scml4
chr9@bin_895_c	hypo_methylation	Ubash3b
chr14@bin_3088_w	hypo_methylation
chr7@bin_1355_w	hypo_methylation
chr2@bin_4451_w	hypo_methylation	Plcb4
chr4@bin_1312_c	hypo_methylation
chr15@bin_2280_w	hypo_methylation	Sh3bp1
chr17@bin_46_c	hypo_methylation
chr18@bin_1613_w	hypo_methylation	Adamts19
chr19@bin_1689_c	hypo_methylation
chr8@bin_824_c	hypo_methylation
chr17@bin_3662_c	hypo_methylation
chr9@bin_1153_c	hypo_methylation
chr11@bin_1357_w	hypo_methylation	Ifi47,Olfr56
chr5@bin_3452_w	hypo_methylation	1700081H04Rik
chr3@bin_2419_w	hypo_methylation
chr18@bin_2313_c	hypo_methylation
chr3@bin_2113_w	hypo_methylation	Fcrl5
chr12@bin_1457_c	hypo_methylation
chr12@bin_3948_w	hypo_methylation	Ptprn2
chr18@bin_1105_w	hypo_methylation	Arhgap26
chr3@bin_2128_c	hypo_methylation	Lrrc71
chr15@bin_1311_w	hypo_methylation
chr6@bin_2266_c	hypo_methylation
chr13@bin_3868_w	hypo_methylation	Arl15
chr11@bin_954_w	hypo_methylation
chr19@bin_2564_w	hypo_methylation
chr7@bin_1860_c	hypo_methylation
chr18@bin_1691_w	hypo_methylation	Camk2a
chr18@bin_2796_c	hypo_methylation
chr9@bin_2602_w	hypo_methylation
chr6@bin_1999_c	hypo_methylation
chr2@bin_1676_w	hypo_methylation
chr7@bin_3300_w	hypo_methylation
chr7@bin_1662_c	hypo_methylation	Mybpc2
chr8@bin_3512_c	hypo_methylation
chr19@bin_2076_w	hypo_methylation	Sufu
chr9@bin_3382_w	hypo_methylation
chr11@bin_1380_w	hypo_methylation
chr2@bin_6233_c	hypo_methylation
chr17@bin_2718_c	hypo_methylation
chr1@bin_4425_w	hypo_methylation
chr6@bin_2294_w	hypo_methylation	Arl6ip5
chr2@bin_1173_w	hypo_methylation
chr19@bin_355_c	hypo_methylation
chr5@bin_1462_w	hypo_methylation	Limch1
chr3@bin_4192_c	hypo_methylation
chr8@bin_2914_w	hypo_methylation
chr18@bin_134_c	hypo_methylation
chrX@bin_2004_w	hypo_methylation	Zcchc18
chr1@bin_593_w	hypo_methylation
chr11@bin_2737_w	hypo_methylation
chr10@bin_2896_w	hypo_methylation	Adat3,Scamp4
chr18@bin_1144_w	hypo_methylation
chr14@bin_1944_c	hypo_methylation	Atp8a2
chr7@bin_1299_c	hypo_methylation
chr3@bin_4422_c	hypo_methylation	Ak5
chr13@bin_2515_c	hypo_methylation
chr1@bin_591_w	hypo_methylation
chr2@bin_987_w	hypo_methylation
chr10@bin_1362_w	hypo_methylation
chr14@bin_2220_c	hypo_methylation	Scara3
chr8@bin_2216_w	hypo_methylation	Adgrl1
chr4@bin_1687_c	hypo_methylation
chr11@bin_4360_w	hypo_methylation
chr14@bin_733_w	hypo_methylation	Erc2
chr3@bin_2051_w	hypo_methylation
chr11@bin_1948_w	hypo_methylation	Med9
chr5@bin_372_w	hypo_methylation	Chpf2
chr4@bin_4093_c	hypo_methylation
chr13@bin_1223_w	hypo_methylation
chr2@bin_124_c	hypo_methylation
chr17@bin_879_w	hypo_methylation
chr11@bin_4086_c	hypo_methylation
chr17@bin_1355_c	hypo_methylation
chr11@bin_5245_w	hypo_methylation
chr19@bin_2010_w	hypo_methylation
chr3@bin_4354_c	hypo_methylation	BC075654,AK082954
chr5@bin_4122_w	hypo_methylation	Tmem132c
chr12@bin_468_w	hypo_methylation
chr9@bin_3566_c	hypo_methylation
chr2@bin_2991_c	hypo_methylation	Dgkz
chr15@bin_2555_w	hypo_methylation
chr9@bin_1800_c	hypo_methylation
chr5@bin_1759_w	hypo_methylation
chr19@bin_83_c	hypo_methylation	Carns1
chr3@bin_1163_w	hypo_methylation
chr15@bin_279_c	hypo_methylation
chr10@bin_4218_c	hypo_methylation
chr11@bin_5245_c	hypo_methylation	Slc39a11
chr13@bin_1740_w	hypo_methylation
chr12@bin_3229_w	hypo_methylation
chr16@bin_1078_c	hypo_methylation
chr10@bin_873_w	hypo_methylation
chr11@bin_3474_c	hypo_methylation
chr15@bin_296_c	hypo_methylation	Pdzd2
chr5@bin_5477_c	hypo_methylation
chr17@bin_3623_w	hypo_methylation
chr8@bin_4337_c	hypo_methylation
chr19@bin_1671_c	hypo_methylation
chr7@bin_10_c	hypo_methylation	Mir290b
chr2@bin_4646_w	hypo_methylation	Slc24a3
chr11@bin_2528_c	hypo_methylation	Alox12
chr1@bin_2618_w	hypo_methylation
chr15@bin_2189_c	hypo_methylation	Cacng2
chr10@bin_1588_w	hypo_methylation
chrX@bin_106_c	hypo_methylation	Ftsj1
chr1@bin_1750_c	hypo_methylation
chr4@bin_3358_w	hypo_methylation
chr8@bin_4015_w	hypo_methylation
chr15@bin_2838_c	hypo_methylation
chr17@bin_2109_c	hypo_methylation
chr9@bin_2032_c	hypo_methylation
chr5@bin_793_w	hypo_methylation	Ablim2
chr10@bin_3226_w	hypo_methylation
chr10@bin_674_w	hypo_methylation
chr1@bin_2947_w	hypo_methylation
chr11@bin_5830_w	hypo_methylation	Afmid
chr12@bin_3603_w	hypo_methylation
chrX@bin_134_w	hypo_methylation	Xk
chr19@bin_1844_c	hypo_methylation	Cpn1
chr1@bin_4914_w	hypo_methylation	Tada1
chr4@bin_4607_c	hypo_methylation
chr12@bin_1818_w	hypo_methylation	2700049A03Rik
chr12@bin_2754_c	hypo_methylation
chr8@bin_3594_c	hypo_methylation
chr15@bin_2596_c	hypo_methylation
chr12@bin_2079_c	hypo_methylation	Sptb
chr15@bin_2998_w	hypo_methylation
chr9@bin_1548_w	hypo_methylation
chr3@bin_135_w	hypo_methylation
chr12@bin_3001_c	hypo_methylation	Trip11
chr3@bin_1153_c	hypo_methylation	AK132084
chr13@bin_3116_c	hypo_methylation
chr3@bin_354_c	hypo_methylation
chr13@bin_3854_c	hypo_methylation
chr10@bin_2735_c	hypo_methylation
chr7@bin_1943_w	hypo_methylation
chr7@bin_2832_w	hypo_methylation
chr13@bin_614_w	hypo_methylation
chr17@bin_81_w	hypo_methylation	Zdhhc14
chr12@bin_3099_c	hypo_methylation
chr5@bin_2102_w	hypo_methylation	2018-09-11
chr11@bin_4730_c	hypo_methylation	Map3k14
chr11@bin_2691_w	hypo_methylation	Camkk1
chr16@bin_818_w	hypo_methylation
chr4@bin_5695_c	hypo_methylation
chr6@bin_3209_w	hypo_methylation
chr7@bin_3281_c	hypo_methylation
chr5@bin_1777_c	hypo_methylation
chr18@bin_1669_w	hypo_methylation
chr1@bin_984_w	hypo_methylation
chr3@bin_3721_w	hypo_methylation
chr15@bin_3865_c	hypo_methylation
chr2@bin_3567_w	hypo_methylation
chr18@bin_2648_c	hypo_methylation
chr15@bin_3157_c	hypo_methylation
chrX@bin_171_c	hypo_methylation
chrX@bin_1427_w	hypo_methylation
chr16@bin_2359_c	hypo_methylation
chr9@bin_2676_w	hypo_methylation
chr2@bin_2206_c	hypo_methylation
chr17@bin_1751_w	hypo_methylation
chr12@bin_1834_w	hypo_methylation	AK050197
chr4@bin_4795_c	hypo_methylation
chr17@bin_1531_w	hypo_methylation
chr1@bin_247_c	hypo_methylation	Ncoa2
chr9@bin_3440_c	hypo_methylation
chr2@bin_3913_w	hypo_methylation
chr9@bin_2764_w	hypo_methylation
chr8@bin_139_c	hypo_methylation
chr13@bin_2123_c	hypo_methylation	Agtpbp1
chr7@bin_1525_c	hypo_methylation
chr5@bin_3588_w	hypo_methylation
chr7@bin_4594_w	hypo_methylation
chr2@bin_5930_c	hypo_methylation
chr3@bin_852_w	hypo_methylation
chr2@bin_4022_w	hypo_methylation
chr6@bin_1028_w	hypo_methylation
chr5@bin_5435_w	hypo_methylation
chr8@bin_1242_c	hypo_methylation	Ankrd37
chr13@bin_851_w	hypo_methylation
chr4@bin_166_c	hypo_methylation	Asph
chr19@bin_754_w	hypo_methylation
chr12@bin_3046_w	hypo_methylation
chr1@bin_4896_c	hypo_methylation
chr14@bin_2173_c	hypo_methylation	Extl3
chr15@bin_2081_c	hypo_methylation
chr7@bin_2528_w	hypo_methylation
chr13@bin_3319_c	hypo_methylation
chr16@bin_335_c	hypo_methylation
chrX@bin_603_c	hypo_methylation
chr10@bin_2025_w	hypo_methylation
chr15@bin_2523_w	hypo_methylation	Grap2
chr10@bin_3630_w	hypo_methylation
chr7@bin_1449_w	hypo_methylation
chr11@bin_6022_c	hypo_methylation
chr3@bin_3357_w	hypo_methylation	Dbt
chr4@bin_925_c	hypo_methylation	Arid3c
chr9@bin_2448_w	hypo_methylation
chr10@bin_3555_c	hypo_methylation	Vezt
chr19@bin_2154_c	hypo_methylation	Sh3pxd2a
chr8@bin_392_w	hypo_methylation
chr1@bin_2771_c	hypo_methylation
chr14@bin_1686_w	hypo_methylation
chr4@bin_6269_c	hypo_methylation
chr18@bin_2085_w	hypo_methylation	Tcf4
chr6@bin_377_w	hypo_methylation
chr4@bin_1910_c	hypo_methylation
chr17@bin_214_c	hypo_methylation
chr11@bin_1797_w	hypo_methylation
chr1@bin_4813_c	hypo_methylation
chr4@bin_179_w	hypo_methylation
chr1@bin_3385_c	hypo_methylation
chr6@bin_2588_c	hypo_methylation
chr15@bin_2399_c	hypo_methylation	Fam227a
chr11@bin_4331_w	hypo_methylation
chr2@bin_5260_w	hypo_methylation	Nnat
chr4@bin_5368_c	hypo_methylation	Crocc
chr2@bin_6624_w	hypo_methylation	Gnas
chr1@bin_1950_w	hypo_methylation	Rufy4
chr13@bin_285_c	hypo_methylation	Tbce
chr4@bin_2262_w	hypo_methylation
chr3@bin_1362_c	hypo_methylation
chr2@bin_2305_c	hypo_methylation
chr2@bin_6531_w	hypo_methylation	Pck1
chr17@bin_3961_w	hypo_methylation	Prkce
chr7@bin_3856_c	hypo_methylation
chr1@bin_4999_c	hypo_methylation	Pbx1
chr5@bin_3942_c	hypo_methylation	Rilpl2
chr15@bin_1172_c	hypo_methylation
chr7@bin_3616_c	hypo_methylation
chr12@bin_2873_w	hypo_methylation
chr18@bin_2122_w	hypo_methylation
chr5@bin_5061_w	hypo_methylation
chr10@bin_602_w	hypo_methylation
chr3@bin_1633_c	hypo_methylation	Veph1
chr17@bin_766_w	hypo_methylation
chr2@bin_1254_w	hypo_methylation	Fam129b
chr7@bin_4390_w	hypo_methylation	Htra1
chr2@bin_6572_c	hypo_methylation
chr3@bin_2048_w	hypo_methylation
chr4@bin_4591_w	hypo_methylation
chr19@bin_2134_w	hypo_methylation
chr3@bin_3370_c	hypo_methylation	Agl
chr8@bin_2687_c	hypo_methylation
chr1@bin_4854_w	hypo_methylation
chr8@bin_32_w	hypo_methylation	Mcemp1
chr10@bin_492_c	hypo_methylation
chr14@bin_3397_c	hypo_methylation
chr11@bin_3926_w	hypo_methylation
chr1@bin_6031_c	hypo_methylation
chr5@bin_4436_c	hypo_methylation
chr5@bin_1406_c	hypo_methylation
chr1@bin_1717_c	hypo_methylation	Akr1cl
chr17@bin_314_c	hypo_methylation
chr9@bin_3170_w	hypo_methylation
chr19@bin_612_c	hypo_methylation	Dagla
chr4@bin_5879_w	hypo_methylation
chr1@bin_1956_w	hypo_methylation
chr10@bin_1868_c	hypo_methylation
chr12@bin_3023_w	hypo_methylation	Rin3
chr1@bin_5241_c	hypo_methylation	Cadm3
chr18@bin_2711_c	hypo_methylation
chr4@bin_5639_c	hypo_methylation	Tnfrsf8
chr8@bin_409_w	hypo_methylation
chr10@bin_4339_c	hypo_methylation
chr19@bin_1350_w	hypo_methylation
chr19@bin_333_c	hypo_methylation
chr2@bin_3189_w	hypo_methylation
chr2@bin_6208_c	hypo_methylation
chr13@bin_1271_w	hypo_methylation	Cap2
chr3@bin_1713_w	hypo_methylation	Ppm1l
chr11@bin_6278_c	hypo_methylation
chr4@bin_461_c	hypo_methylation
chr16@bin_1408_c	hypo_methylation
chr3@bin_255_w	hypo_methylation
chr13@bin_4001_w	hypo_methylation	Gm7120
chr12@bin_2744_w	hypo_methylation
chr6@bin_1017_c	hypo_methylation
chr17@bin_1229_w	hypo_methylation
chr12@bin_2400_w	hypo_methylation
chr1@bin_4395_w	hypo_methylation
chr10@bin_4108_w	hypo_methylation
chr4@bin_353_c	hypo_methylation
chr4@bin_4522_w	hypo_methylation
chr15@bin_4009_c	hypo_methylation
chr5@bin_939_c	hypo_methylation
chr8@bin_1345_w	hypo_methylation	Cldn22
chr4@bin_3325_w	hypo_methylation
chr12@bin_1855_c	hypo_methylation
chr12@bin_3960_w	hypo_methylation	Rapgef5
chr11@bin_1723_w	hypo_methylation
chr9@bin_3522_c	hypo_methylation	Klhl18
chr6@bin_874_c	hypo_methylation
chrX@bin_499_w	hypo_methylation	Rhox7a
chr13@bin_3899_w	hypo_methylation
chr4@bin_3042_w	hypo_methylation
chr10@bin_3250_c	hypo_methylation
chr13@bin_3850_c	hypo_methylation	Hspb3
chr5@bin_811_c	hypo_methylation
chr3@bin_3516_c	hypo_methylation
chr16@bin_680_w	hypo_methylation
chr13@bin_1950_w	hypo_methylation	Tgfbi
chr9@bin_2897_c	hypo_methylation	Zbtb38
chr6@bin_2215_c	hypo_methylation
chr6@bin_420_c	hypo_methylation
chr11@bin_6118_c	hypo_methylation	Cep131
chr18@bin_2795_w	hypo_methylation
chr7@bin_4122_c	hypo_methylation	Ppp4c
chr12@bin_178_w	hypo_methylation
chr14@bin_1581_c	hypo_methylation	Sall2
chr4@bin_5936_w	hypo_methylation
chr2@bin_6339_c	hypo_methylation
chr9@bin_3085_c	hypo_methylation	Ephb1
chr14@bin_1434_w	hypo_methylation
chr11@bin_59_w	hypo_methylation
chr1@bin_4366_c	hypo_methylation	1700025G04Rik
chr12@bin_826_c	hypo_methylation
chr18@bin_2328_w	hypo_methylation	Gm10532
chr17@bin_3202_w	hypo_methylation
chr3@bin_944_c	hypo_methylation
chr17@bin_3653_c	hypo_methylation
chr8@bin_260_c	hypo_methylation
chr2@bin_2387_w	hypo_methylation
chr2@bin_5768_c	hypo_methylation
chr17@bin_4019_c	hypo_methylation
chr18@bin_2769_c	hypo_methylation
chr12@bin_3700_c	hypo_methylation	Ppp1r13b
chr8@bin_870_c	hypo_methylation
chr14@bin_1988_w	hypo_methylation	Mipep
chr12@bin_423_c	hypo_methylation
chr3@bin_3496_c	hypo_methylation
chr16@bin_2748_w	hypo_methylation	Clic6
chr7@bin_4163_c	hypo_methylation
chr2@bin_6002_c	hypo_methylation
chr16@bin_1473_c	hypo_methylation
chr15@bin_3198_w	hypo_methylation
chr2@bin_3972_w	hypo_methylation
chr13@bin_1096_c	hypo_methylation
chr8@bin_2166_c	hypo_methylation
chr7@bin_4663_c	hypo_methylation	Tcerg1l
chr3@bin_735_c	hypo_methylation
chr7@bin_426_w	hypo_methylation	Ptgir
chr15@bin_4064_w	hypo_methylation	Tns2
chr4@bin_6266_c	hypo_methylation
chr9@bin_1110_w	hypo_methylation
chr18@bin_1639_w	hypo_methylation
chr11@bin_3511_w	hypo_methylation	Tex14
chr2@bin_5029_w	hypo_methylation
chr9@bin_3500_c	hypo_methylation
chr10@bin_1898_w	hypo_methylation
chr3@bin_2733_c	hypo_methylation
chr1@bin_4609_w	hypo_methylation
chr6@bin_2385_w	hypo_methylation
chr4@bin_4450_c	hypo_methylation	Zdhhc18
chr15@bin_638_c	hypo_methylation
chr19@bin_2555_c	hypo_methylation	Ablim1
chr13@bin_9_c	hypo_methylation
chr14@bin_2165_w	hypo_methylation
chr4@bin_6013_c	hypo_methylation	Park7
chr4@bin_663_w	hypo_methylation
chr14@bin_1002_c	hypo_methylation
chr7@bin_3716_w	hypo_methylation
chr14@bin_743_c	hypo_methylation
chr11@bin_5354_w	hypo_methylation
chr15@bin_141_w	hypo_methylation
chr18@bin_2706_w	hypo_methylation	Mbp
chr15@bin_3846_c	hypo_methylation	Lima1
chr1@bin_841_w	hypo_methylation	Fer1l5
chr17@bin_2702_w	hypo_methylation
chr3@bin_367_w	hypo_methylation
chr3@bin_3239_w	hypo_methylation
chr5@bin_2035_c	hypo_methylation
chr17@bin_861_c	hypo_methylation
chr17@bin_2214_c	hypo_methylation
chr1@bin_3730_w	hypo_methylation	Pik3c2b
chr9@bin_742_c	hypo_methylation
chr18@bin_1266_c	hypo_methylation
chr6@bin_3849_c	hypo_methylation	Itpr2
chr4@bin_2963_c	hypo_methylation
chr15@bin_2266_w	hypo_methylation
chr5@bin_5430_w	hypo_methylation	2210417A02Rik
chr13@bin_3069_w	hypo_methylation	Arsb
chr19@bin_378_c	hypo_methylation	Rps6ka4
chr12@bin_3088_w	hypo_methylation
chr6@bin_1443_c	hypo_methylation
chr8@bin_3687_w	hypo_methylation	Cdh13
chr12@bin_3442_w	hypo_methylation	Eml1
chr7@bin_2446_w	hypo_methylation
chr2@bin_5357_c	hypo_methylation
chr4@bin_6011_c	hypo_methylation
chr13@bin_3725_w	hypo_methylation
chr8@bin_183_w	hypo_methylation
chr9@bin_1952_c	hypo_methylation	Smad3
chr2@bin_1003_c	hypo_methylation
chr17@bin_989_c	hypo_methylation
chr7@bin_1403_w	hypo_methylation
chr3@bin_344_w	hypo_methylation
chr11@bin_6263_c	hypo_methylation	Zfp750
chr5@bin_4728_w	hypo_methylation	Azgp1
chr17@bin_172_w	hypo_methylation
chr4@bin_1538_w	hypo_methylation
chr7@bin_104_w	hypo_methylation	Ssc5d
chr5@bin_3567_w	hypo_methylation
chr5@bin_406_w	hypo_methylation
chr17@bin_2940_c	hypo_methylation
chr11@bin_2883_w	hypo_methylation
chr17@bin_3553_w	hypo_methylation
chr2@bin_3287_w	hypo_methylation
chr16@bin_1455_c	hypo_methylation	Arhgap31
chr1@bin_5264_c	hypo_methylation	Grem2
chr2@bin_23_w	hypo_methylation	Fam107b
chr3@bin_3352_c	hypo_methylation
chr9@bin_3341_w	hypo_methylation
chr11@bin_3741_w	hypo_methylation
chr11@bin_156_w	hypo_methylation	Rhbdd3
chr2@bin_4795_c	hypo_methylation	Nanp
chr9@bin_200_c	hypo_methylation
chr19@bin_726_w	hypo_methylation
chr11@bin_4658_c	hypo_methylation
chr4@bin_4155_c	hypo_methylation
chr14@bin_103_c	hypo_methylation
chr1@bin_5653_w	hypo_methylation
chr10@bin_1007_c	hypo_methylation
chr2@bin_4590_w	hypo_methylation
chr3@bin_3245_w	hypo_methylation
chr12@bin_1511_c	hypo_methylation
chr15@bin_1476_c	hypo_methylation	Mtss1
chr3@bin_800_w	hypo_methylation	Sox2ot
chr2@bin_5237_c	hypo_methylation	Ghrh
chr17@bin_3557_w	hypo_methylation
chr3@bin_4437_w	hypo_methylation
chr5@bin_2826_c	hypo_methylation	Myo18b
chr11@bin_2623_c	hypo_methylation
chr18@bin_982_w	hypo_methylation	Gm38666,Gm38667,AK149307,Gm37013
chr14@bin_446_w	hypo_methylation
chr6@bin_2695_c	hypo_methylation	Vgll4
chr18@bin_1864_w	hypo_methylation
chr3@bin_2133_c	hypo_methylation	Pear1
chr7@bin_4559_w	hypo_methylation	Ptpre
chr11@bin_1725_w	hypo_methylation
chr11@bin_5200_c	hypo_methylation	BC006965
chr19@bin_2478_c	hypo_methylation
chr16@bin_107_w	hypo_methylation	Alg1
chr6@bin_3880_c	hypo_methylation
chr17@bin_4038_w	hypo_methylation
chr5@bin_2883_w	hypo_methylation	DQ552775,DQ561436,Aym1
chr12@bin_1949_c	hypo_methylation
chr3@bin_2608_c	hypo_methylation
chr18@bin_1472_c	hypo_methylation
chr12@bin_2295_w	hypo_methylation
chr3@bin_3852_w	hypo_methylation	Tbck
chr9@bin_2076_c	hypo_methylation
chr14@bin_1527_w	hypo_methylation
chr9@bin_894_c	hypo_methylation	Ubash3b
chr18@bin_486_c	hypo_methylation
chr3@bin_2866_c	hypo_methylation
chr6@bin_1001_w	hypo_methylation	AI854703
chr1@bin_3384_w	hypo_methylation
chr3@bin_2364_w	hypo_methylation	Nup210l
chr12@bin_3362_c	hypo_methylation
chr3@bin_4206_c	hypo_methylation
chr18@bin_694_w	hypo_methylation	Lims2
chr19@bin_947_c	hypo_methylation	Mamdc2
chr3@bin_2139_c	hypo_methylation
chr16@bin_706_w	hypo_methylation
chr1@bin_4709_w	hypo_methylation	Serpinc1
chrX@bin_2516_c	hypo_methylation
chr10@bin_1675_c	hypo_methylation	Pldi
chr1@bin_233_w	hypo_methylation
chr16@bin_1451_w	hypo_methylation
chr12@bin_3568_w	hypo_methylation	Ppp2r5c
chr7@bin_1465_w	hypo_methylation
chr1@bin_5842_w	hypo_methylation
chr1@bin_204_w	hypo_methylation	A830018L16Rik
chr10@bin_4100_c	hypo_methylation	Lgr5
chrX@bin_2516_w	hypo_methylation
chr12@bin_2419_w	hypo_methylation
chr19@bin_1948_c	hypo_methylation
chr2@bin_2613_c	hypo_methylation	Zfp385b
chr2@bin_169_w	hypo_methylation
chrX@bin_1403_w	hypo_methylation
chr14@bin_1718_c	hypo_methylation	Zfhx2
chr13@bin_3491_w	hypo_methylation
chr4@bin_861_c	hypo_methylation
chr3@bin_3508_c	hypo_methylation
chr2@bin_851_w	hypo_methylation
chr7@bin_803_w	hypo_methylation	Atp5sl
chr17@bin_75_w	hypo_methylation	Zdhhc14
chr16@bin_827_w	hypo_methylation
chr2@bin_3745_w	hypo_methylation
chr12@bin_1432_w	hypo_methylation
chr2@bin_1177_w	hypo_methylation	Ciz1
chr10@bin_4429_w	hypo_methylation	Gns
chr3@bin_4123_c	hypo_methylation
chr3@bin_3971_w	hypo_methylation
chr7@bin_165_c	hypo_methylation
chr4@bin_2210_w	hypo_methylation	AK044374
chr13@bin_3453_c	hypo_methylation	Pik3r1
chr15@bin_1725_c	hypo_methylation
chr12@bin_1226_w	hypo_methylation
chr2@bin_6787_c	hypo_methylation	Lama5
chr17@bin_3157_c	hypo_methylation
chr4@bin_3427_w	hypo_methylation
chr15@bin_1741_c	hypo_methylation
chr9@bin_1210_w	hypo_methylation	Sik3
chr15@bin_3965_c	hypo_methylation
chr17@bin_1061_w	hypo_methylation
chr3@bin_4016_c	hypo_methylation
chr7@bin_3615_c	hypo_methylation
chr5@bin_87_w	hypo_methylation
chr12@bin_1869_w	hypo_methylation	Jkamp
chr17@bin_2624_c	hypo_methylation
chr13@bin_4014_w	hypo_methylation
chr13@bin_2721_c	hypo_methylation
chr6@bin_2031_c	hypo_methylation
chr14@bin_3080_w	hypo_methylation
chr6@bin_2276_c	hypo_methylation
chr2@bin_6312_c	hypo_methylation	Bcas1
chr2@bin_1628_c	hypo_methylation	Lrp1b
chr5@bin_3661_c	hypo_methylation
chr3@bin_3070_c	hypo_methylation
chr7@bin_594_w	hypo_methylation
chr2@bin_3819_w	hypo_methylation	Itpka
chr10@bin_1792_w	hypo_methylation
chr1@bin_5353_w	hypo_methylation	Desi2
chr7@bin_3801_w	hypo_methylation
chr4@bin_250_w	hypo_methylation
chr4@bin_4261_c	hypo_methylation
chr8@bin_3600_c	hypo_methylation
chr18@bin_1339_w	hypo_methylation
chr4@bin_2840_w	hypo_methylation	Glis1
chr6@bin_2751_w	hypo_methylation
chr2@bin_1803_w	hypo_methylation
chr6@bin_1025_w	hypo_methylation
chr16@bin_1162_c	hypo_methylation
chr3@bin_2037_w	hypo_methylation	Tmem154
chr13@bin_3770_w	hypo_methylation
chr2@bin_6410_w	hypo_methylation
chr17@bin_967_w	hypo_methylation	Neurl1b
chr12@bin_2012_c	hypo_methylation	Wdr89
chr9@bin_2111_c	hypo_methylation	Rab8b
chr12@bin_1222_c	hypo_methylation
chr13@bin_3334_c	hypo_methylation	Tnpo1
chr4@bin_4928_w	hypo_methylation
chr5@bin_1268_c	hypo_methylation
chr15@bin_3358_w	hypo_methylation
chr1@bin_367_w	hypo_methylation
chr8@bin_2595_w	hypo_methylation	Fto
chr19@bin_2106_c	hypo_methylation
chr10@bin_4546_c	hypo_methylation
chr17@bin_3921_w	hypo_methylation
chr13@bin_1148_c	hypo_methylation
chr5@bin_4164_w	hypo_methylation
chr3@bin_2433_w	hypo_methylation
chr2@bin_3587_w	hypo_methylation
chr4@bin_2123_w	hypo_methylation
chr12@bin_332_w	hypo_methylation
chr12@bin_2986_c	hypo_methylation
chr3@bin_1248_c	hypo_methylation
chr9@bin_3700_c	hypo_methylation	Cmtm7
chrX@bin_1014_w	hypo_methylation
chr1@bin_5775_c	hypo_methylation
chr15@bin_1570_c	hypo_methylation
chr1@bin_1647_c	hypo_methylation
chr10@bin_4028_c	hypo_methylation	4933440J02Rik
chr7@bin_3861_w	hypo_methylation
chr6@bin_993_c	hypo_methylation
chr4@bin_2211_w	hypo_methylation	AK044374
chr17@bin_1407_c	hypo_methylation
chr16@bin_152_c	hypo_methylation
chr15@bin_1307_c	hypo_methylation	Samd12
chr13@bin_1845_c	hypo_methylation
chr6@bin_1426_c	hypo_methylation
chr12@bin_2509_w	hypo_methylation
chr1@bin_2076_w	hypo_methylation
chr7@bin_989_w	hypo_methylation
chr5@bin_3626_w	hypo_methylation
chr12@bin_2298_c	hypo_methylation
chr3@bin_447_w	hypo_methylation
chr16@bin_1570_c	hypo_methylation	Boc
chr13@bin_1598_c	hypo_methylation
chr3@bin_4479_w	hypo_methylation
chr11@bin_3478_w	hypo_methylation	AK132089
chr2@bin_4807_c	hypo_methylation
chr13@bin_2710_c	hypo_methylation
chr2@bin_6395_w	hypo_methylation
chr7@bin_1664_w	hypo_methylation
chr14@bin_2294_c	hypo_methylation	4930438E09Rik
chr17@bin_19_c	hypo_methylation	Nox3
chr17@bin_284_w	hypo_methylation
chr3@bin_3498_c	hypo_methylation
chr15@bin_3847_c	hypo_methylation	Lima1
chr10@bin_4677_w	hypo_methylation
chr15@bin_3793_w	hypo_methylation
chr19@bin_1944_w	hypo_methylation
chr17@bin_284_c	hypo_methylation
chr3@bin_3464_c	hypo_methylation
chr11@bin_1039_w	hypo_methylation	Slit3
chr8@bin_4377_w	hypo_methylation
chr1@bin_3346_w	hypo_methylation
chr4@bin_2600_w	hypo_methylation	0610043K17Rik
chr9@bin_1023_c	hypo_methylation
chr1@bin_3609_c	hypo_methylation	Rassf5
chr8@bin_1434_c	hypo_methylation
chr3@bin_76_w	hypo_methylation
chr4@bin_709_w	hypo_methylation
chr2@bin_6586_c	hypo_methylation
chr9@bin_2892_c	hypo_methylation
chr16@bin_826_w	hypo_methylation
chr1@bin_5274_w	hypo_methylation
chr19@bin_946_w	hypo_methylation
chr5@bin_1510_c	hypo_methylation
chr9@bin_1168_w	hypo_methylation	Dscaml1
chr2@bin_6710_w	hypo_methylation
chr6@bin_362_c	hypo_methylation	Wasl
chr8@bin_3587_c	hypo_methylation
chr19@bin_217_c	hypo_methylation
chr17@bin_173_c	hypo_methylation	Fndc1
chr9@bin_4054_w	hypo_methylation
chr2@bin_4981_c	hypo_methylation
chr10@bin_1728_w	hypo_methylation	Lrrc20
chr7@bin_4665_c	hypo_methylation	Tcerg1l
chr4@bin_1411_c	hypo_methylation
chr10@bin_2260_c	hypo_methylation	Cisd1
chr11@bin_6113_c	hypo_methylation
chr12@bin_862_c	hypo_methylation
chr3@bin_2540_w	hypo_methylation
chr2@bin_6429_c	hypo_methylation
chr16@bin_2940_w	hypo_methylation
chr3@bin_3374_c	hypo_methylation
chr9@bin_589_c	hypo_methylation	Ntm
chr17@bin_1975_w	hypo_methylation
chr11@bin_5113_w	hypo_methylation	Arsg
chr17@bin_3574_w	hypo_methylation
chr2@bin_1108_c	hypo_methylation	Fibcd1
chr16@bin_1490_c	hypo_methylation
chr10@bin_1981_w	hypo_methylation
chr19@bin_2023_w	hypo_methylation
chr2@bin_753_w	hypo_methylation	Rxra
chr12@bin_1948_c	hypo_methylation
chr1@bin_4100_w	hypo_methylation
chr10@bin_4210_w	hypo_methylation
chr7@bin_368_c	hypo_methylation	Ccdc9
chr18@bin_1314_c	hypo_methylation
chr14@bin_855_w	hypo_methylation
chr13@bin_3163_w	hypo_methylation
chr1@bin_3942_w	hypo_methylation
chr8@bin_913_c	hypo_methylation
chr7@bin_439_c	hypo_methylation	Hif3a
chr3@bin_4444_c	hypo_methylation
chr8@bin_2202_c	hypo_methylation
chr1@bin_126_c	hypo_methylation	Sntg1
chr12@bin_3186_c	hypo_methylation	Syne3
chr8@bin_3866_w	hypo_methylation	Gse1
chr16@bin_2514_c	hypo_methylation	Tiam1
chr19@bin_2622_w	hypo_methylation
chr2@bin_4583_c	hypo_methylation	Bfsp1
chr7@bin_31_w	hypo_methylation
chr5@bin_3445_c	hypo_methylation
chr18@bin_805_c	hypo_methylation
chr17@bin_845_w	hypo_methylation	Tpsg1
chr11@bin_5367_c	hypo_methylation
chr8@bin_3868_w	hypo_methylation	Gse1
chr8@bin_3562_c	hypo_methylation
chr19@bin_2570_c	hypo_methylation
chr16@bin_1707_c	hypo_methylation
chr6@bin_1237_w	hypo_methylation
chr16@bin_222_c	hypo_methylation
chr17@bin_2479_c	hypo_methylation	Foxp4
chr19@bin_1555_c	hypo_methylation	Cyp2c69
chr1@bin_4206_c	hypo_methylation
chr15@bin_603_c	hypo_methylation
chr9@bin_2569_c	hypo_methylation
chr4@bin_515_c	hypo_methylation
chr10@bin_4103_c	hypo_methylation
chr13@bin_107_w	hypo_methylation
chr6@bin_1283_c	hypo_methylation	Pde1c
chr2@bin_271_w	hypo_methylation
chr12@bin_848_c	hypo_methylation
chr15@bin_930_w	hypo_methylation
chr17@bin_1979_c	hypo_methylation
chr9@bin_1935_w	hypo_methylation
chr12@bin_2503_w	hypo_methylation
chrX@bin_1991_w	hypo_methylation
chrX@bin_54_c	hypo_methylation	Plp2
chr18@bin_2585_c	hypo_methylation
chr2@bin_5379_c	hypo_methylation
chr4@bin_4078_c	hypo_methylation
chr7@bin_3529_c	hypo_methylation
chr5@bin_2948_w	hypo_methylation	Dao
chr11@bin_4282_w	hypo_methylation	Cdc6
chr1@bin_4145_w	hypo_methylation
chr4@bin_2363_w	hypo_methylation
chr16@bin_2737_c	hypo_methylation	Rcan1
chr14@bin_551_c	hypo_methylation	Dlg5
chr11@bin_1291_w	hypo_methylation
chr14@bin_1175_w	hypo_methylation
chr4@bin_3249_c	hypo_methylation
chrX@bin_2226_w	hypo_methylation
chr3@bin_4307_c	hypo_methylation
chr6@bin_652_c	hypo_methylation	Akr1b3
chr19@bin_2095_w	hypo_methylation	Wbp1l
chr5@bin_4819_c	hypo_methylation	3110082I17Rik
chr17@bin_627_c	hypo_methylation
chr6@bin_1_c	hypo_methylation
chr17@bin_1873_w	hypo_methylation
chr15@bin_695_c	hypo_methylation
chr2@bin_2708_w	hypo_methylation
chr13@bin_623_c	hypo_methylation	2610307P16Rik
chr19@bin_2095_c	hypo_methylation
chr2@bin_315_w	hypo_methylation	Plxdc2
chr4@bin_6366_w	hypo_methylation
chr4@bin_5849_w	hypo_methylation
chr2@bin_1863_c	hypo_methylation
chr8@bin_535_c	hypo_methylation
chr16@bin_2088_w	hypo_methylation
chr5@bin_2699_c	hypo_methylation
chr11@bin_3139_w	hypo_methylation
chr11@bin_1978_w	hypo_methylation
chr15@bin_1845_w	hypo_methylation
chr4@bin_4227_c	hypo_methylation
chr1@bin_4656_c	hypo_methylation
chr17@bin_3193_w	hypo_methylation
chr12@bin_3229_c	hypo_methylation
chr7@bin_2275_c	hypo_methylation
chr1@bin_3606_c	hypo_methylation	Rassf5
chr7@bin_1067_w	hypo_methylation	Ppp1r14a
chr18@bin_1836_c	hypo_methylation	St8sia3os
chr7@bin_4808_w	hypo_methylation
chr9@bin_2525_c	hypo_methylation
chr6@bin_2864_c	hypo_methylation	Cacna1c
chr9@bin_2280_w	hypo_methylation
chrX@bin_756_c	hypo_methylation
chr4@bin_5111_c	hypo_methylation
chr15@bin_574_c	hypo_methylation
chr17@bin_2326_c	hypo_methylation	Srf
chr5@bin_2466_c	hypo_methylation
chr15@bin_3084_c	hypo_methylation
chr11@bin_4641_w	hypo_methylation	Grn
chr12@bin_40_c	hypo_methylation
chr13@bin_2277_c	hypo_methylation
chr7@bin_2487_c	hypo_methylation
chr9@bin_3731_w	hypo_methylation	Osbpl10
chr11@bin_3724_c	hypo_methylation
chr19@bin_1361_w	hypo_methylation	Fas
chr8@bin_986_w	hypo_methylation
chr8@bin_3504_c	hypo_methylation
chr13@bin_1733_w	hypo_methylation	Cplx2
chr2@bin_3346_w	hypo_methylation	Elf5
chr11@bin_2899_w	hypo_methylation
chr10@bin_3162_c	hypo_methylation
chr4@bin_2556_c	hypo_methylation
chr2@bin_5621_w	hypo_methylation
chr11@bin_5612_w	hypo_methylation
chr10@bin_1121_c	hypo_methylation
chr7@bin_1184_w	hypo_methylation
chr4@bin_2554_w	hypo_methylation	Ror1
chr1@bin_812_c	hypo_methylation
chr5@bin_3476_w	hypo_methylation
chr1@bin_793_c	hypo_methylation
chr18@bin_499_c	hypo_methylation
chr19@bin_574_w	hypo_methylation
chr11@bin_188_c	hypo_methylation
chr15@bin_3662_c	hypo_methylation
chr9@bin_577_w	hypo_methylation	Opcml
chr15@bin_661_c	hypo_methylation	Trio
chr1@bin_3825_w	hypo_methylation	Fmod
chr2@bin_2611_c	hypo_methylation	Zfp385b
chr16@bin_2587_c	hypo_methylation
chr9@bin_3253_c	hypo_methylation
chr17@bin_3175_c	hypo_methylation	Mtcl1
chr2@bin_2491_w	hypo_methylation
chr1@bin_344_w	hypo_methylation
chr11@bin_107_c	hypo_methylation
chr7@bin_2442_c	hypo_methylation
chr14@bin_2031_w	hypo_methylation
chr13@bin_1175_w	hypo_methylation	1700029N11Rik
chr13@bin_2608_w	hypo_methylation	Irx4
chr4@bin_2048_w	hypo_methylation
chr4@bin_4994_w	hypo_methylation	Ece1
chr5@bin_1691_c	hypo_methylation
chr1@bin_4536_c	hypo_methylation
chr4@bin_1081_c	hypo_methylation	Pax5
chr13@bin_563_w	hypo_methylation	Gpld1
chr2@bin_5790_w	hypo_methylation	Eya2
chr19@bin_697_w	hypo_methylation	Osbp
chr12@bin_2319_c	hypo_methylation
chr11@bin_3935_c	hypo_methylation
chr3@bin_2681_w	hypo_methylation	Gja5
chr16@bin_2983_c	hypo_methylation	Dscam
chr14@bin_3572_c	hypo_methylation
chr4@bin_5591_w	hypo_methylation
chr10@bin_3358_c	hypo_methylation	Parpbp
chr11@bin_2114_c	hypo_methylation
chr17@bin_2583_c	hypo_methylation	Gm17830
chr13@bin_3122_c	hypo_methylation
chr11@bin_845_c	hypo_methylation
chr3@bin_4009_w	hypo_methylation
chr1@bin_4470_c	hypo_methylation
chr10@bin_2382_w	hypo_methylation
chr5@bin_696_c	hypo_methylation	Fam53a
chr11@bin_980_c	hypo_methylation
chr16@bin_2772_c	hypo_methylation	Runx1
chr8@bin_3985_c	hypo_methylation
chr13@bin_447_c	hypo_methylation	Prss16
chr4@bin_6352_w	hypo_methylation
chr18@bin_196_c	hypo_methylation
chr4@bin_6184_c	hypo_methylation
chr9@bin_3086_c	hypo_methylation	Ephb1
chr11@bin_594_c	hypo_methylation
chr5@bin_3046_w	hypo_methylation	Tchp
chr11@bin_3618_w	hypo_methylation	C030037D09Rik
chr15@bin_1120_c	hypo_methylation
chr7@bin_2750_c	hypo_methylation
chr6@bin_3919_w	hypo_methylation
chr1@bin_4059_c	hypo_methylation
chr11@bin_2150_w	hypo_methylation	Pmp22
chr12@bin_2219_w	hypo_methylation	Galnt16
chr8@bin_2275_c	hypo_methylation
chr9@bin_1022_c	hypo_methylation
chr14@bin_422_c	hypo_methylation	Anxa7
chr9@bin_3161_w	hypo_methylation
chr4@bin_5746_w	hypo_methylation
chr19@bin_2148_c	hypo_methylation
chr17@bin_3707_c	hypo_methylation
chr12@bin_3686_w	hypo_methylation
chr19@bin_1934_c	hypo_methylation
chr9@bin_871_c	hypo_methylation
chr7@bin_4827_w	hypo_methylation
chr2@bin_2241_c	hypo_methylation
chr5@bin_357_w	hypo_methylation	Agap3
chr2@bin_6407_c	hypo_methylation
chr16@bin_2557_w	hypo_methylation	Hunk
chr1@bin_2514_c	hypo_methylation	Arl4c
chr11@bin_2173_w	hypo_methylation
chr10@bin_1418_w	hypo_methylation
chr3@bin_1607_w	hypo_methylation
chr3@bin_977_w	hypo_methylation
chr7@bin_4612_w	hypo_methylation
chr3@bin_3124_w	hypo_methylation
chr14@bin_3662_c	hypo_methylation
chr1@bin_3842_c	hypo_methylation
chr15@bin_1595_w	hypo_methylation
chr18@bin_1836_w	hypo_methylation	St8sia3
chr1@bin_1056_c	hypo_methylation	Rfx8
chr2@bin_5605_w	hypo_methylation
chr3@bin_3757_w	hypo_methylation	Col25a1
chr8@bin_1119_w	hypo_methylation
chr4@bin_826_c	hypo_methylation
chr1@bin_3596_w	hypo_methylation
chr15@bin_1682_w	hypo_methylation
chr1@bin_3608_w	hypo_methylation
chr2@bin_3596_w	hypo_methylation	Fmn1
chr5@bin_5015_w	hypo_methylation	Foxk1
chr19@bin_793_w	hypo_methylation
chr4@bin_1804_c	hypo_methylation
chr3@bin_3482_w	hypo_methylation
chr9@bin_1341_c	hypo_methylation
chr18@bin_2381_c	hypo_methylation
chr3@bin_4408_w	hypo_methylation
chr8@bin_3907_c	hypo_methylation
chr9@bin_4139_w	hypo_methylation
chr15@bin_3751_w	hypo_methylation
chr9@bin_2664_c	hypo_methylation	Ube2cbp
chr10@bin_1531_c	hypo_methylation
chr18@bin_1038_w	hypo_methylation
chr14@bin_1105_w	hypo_methylation
chr17@bin_3882_w	hypo_methylation	Camkmt
chr15@bin_1538_w	hypo_methylation
chr2@bin_503_w	hypo_methylation
chr8@bin_280_w	hypo_methylation	Arhgef7
chr3@bin_371_w	hypo_methylation
chr4@bin_4466_w	hypo_methylation
chr2@bin_1646_c	hypo_methylation
chr8@bin_3542_w	hypo_methylation
chr3@bin_2313_c	hypo_methylation
chr4@bin_360_c	hypo_methylation
chr9@bin_1230_c	hypo_methylation
chr15@bin_3572_c	hypo_methylation
chr6@bin_3473_w	hypo_methylation
chr3@bin_2008_w	hypo_methylation
chr16@bin_2199_c	hypo_methylation
chr3@bin_4472_w	hypo_methylation
chr12@bin_1489_w	hypo_methylation
chr4@bin_323_c	hypo_methylation
chr7@bin_354_w	hypo_methylation	Slc8a2
chr8@bin_1292_c	hypo_methylation
chr2@bin_5828_c	hypo_methylation
chr19@bin_1442_c	hypo_methylation
chr9@bin_1901_c	hypo_methylation
chr19@bin_1368_w	hypo_methylation	Ifit2
chr5@bin_4113_w	hypo_methylation	Tmem132c
chr2@bin_5855_c	hypo_methylation
chr17@bin_4207_c	hypo_methylation
chr5@bin_5320_c	hypo_methylation	Lnx2
chr4@bin_3590_w	hypo_methylation
chr10@bin_3882_w	hypo_methylation
chr12@bin_3877_w	hypo_methylation
chr9@bin_3703_c	hypo_methylation	Cmtm8
chr15@bin_1036_w	hypo_methylation
chr8@bin_3354_w	hypo_methylation	Znrf1
chr4@bin_1588_w	hypo_methylation
chr9@bin_2050_c	hypo_methylation
chr7@bin_1161_c	hypo_methylation	Kirrel2
chr4@bin_3471_c	hypo_methylation	Smap2
chr6@bin_2771_w	hypo_methylation
chr2@bin_2690_c	hypo_methylation
chr17@bin_2230_w	hypo_methylation
chr5@bin_228_w	hypo_methylation	Magi2
chrX@bin_1230_w	hypo_methylation	5430427O19Rik
chr2@bin_5879_w	hypo_methylation
chr7@bin_4731_w	hypo_methylation
chr2@bin_6155_c	hypo_methylation	Atp9a
chr2@bin_614_c	hypo_methylation
chr15@bin_3141_w	hypo_methylation
chr4@bin_4700_c	hypo_methylation
chr8@bin_4_c	hypo_methylation	Insr
chr14@bin_2211_c	hypo_methylation
chr3@bin_2721_c	hypo_methylation	Pde4dip
chr2@bin_2133_c	hypo_methylation	AK034330
chr8@bin_3390_c	hypo_methylation
chr15@bin_2954_c	hypo_methylation
chr10@bin_4507_c	hypo_methylation
chr16@bin_397_c	hypo_methylation
chr5@bin_212_w	hypo_methylation	Magi2
chr17@bin_213_w	hypo_methylation
chr13@bin_249_w	hypo_methylation
chr15@bin_83_w	hypo_methylation
chr1@bin_5624_c	hypo_methylation
chr6@bin_3510_c	hypo_methylation
chr7@bin_1084_w	hypo_methylation
chr5@bin_3311_w	hypo_methylation	Taok3
chr7@bin_1086_c	hypo_methylation	Sipa1l3
chr14@bin_1928_c	hypo_methylation
[truncated: 158 more rows]
