# Supplementary material for: Dietary Restriction and Rapamycin Affect Brain Aging in Mice by Attenuating Age-Related DNA Methylation Changes
Source: Genes (Basel). 2022 Apr 15;13(4):699. doi: 10.3390/genes13040699 (PMC9030181; doi:10.3390/genes13040699)
Supplement: Supplementary file 1 [file genes-13-00699-s001.zip › Table S6 - GO Enrichment of DR-related DMG.xlsx]

## Sheet: GO of DR-ameliorate hyper DMGs
# Generated by GOATOOLS v0.8.4 (2019-06-09)
# min_ratio=None pval=0.05
GO	NS	enrichment	name	ratio_in_study	ratio_in_pop	p_uncorrected	depth	study_count	p_bonferroni	p_sidak	p_holm	study_items
GO:0007267	BP	e	cell-cell signaling	18/318	156/32695	4.13e-07	n.a.	18	0.0049	0.00478	0.0049	Celsr1, Gm37013, Gpr101, Pcdhga10, Pcdhga11, Pcdhga12, Pcdhga3, Pcdhga4, Pcdhga6, Pcdhga7, Pcdhga9, Pcdhgb1, Pcdhgb2, Pcdhgb4, Pcdhgb5, Pcdhgb8, Pcdhgc3, Pcdhgc5
GO:0007155	BP	e	cell adhesion	32/318	518/32695	9.62e-07	n.a.	32	0.0114	0.0111	0.0114	Ajap1, Bcan, Cdh13, Cdh4, Celsr1, Cfdp1, Col15a1, Dscaml1, Dst, Ephb1, Flot2, Gm37013, Itga3, Itgb2, Kitl, Megf10, Pcdhga10, Pcdhga11, Pcdhga12, Pcdhga3, Pcdhga4, Pcdhga6, Pcdhga7, Pcdhga9, Pcdhgb1, Pcdhgb2, Pcdhgb4, Pcdhgb5, Pcdhgb8, Pcdhgc3, Pcdhgc5, Sdk2
GO:0007275	BP	e	multicellular organism development	29/318	1095/32695	1.27e-06	n.a.	29	0.0151	0.0147	0.0151	Asb1, Bicc1, Ccdc85c, Cdh13, Cdh4, Celsr1, Cfdp1, Dab2ip, Ddx25, Edar, Ephb1, Ephb2, Erbb3, Kdm5a, Lrp1, Mdga1, Musk, Nav1, Ngfr, Nkd1, Obscn, Rarg, Rorb, Sik1, Sim2, Tcf12, Thra, Wnt9a, Zfp521
GO:0007156	BP	e	homophilic cell adhesion via plasma membrane adhesion molecules	8/318	91/32695	3.09e-06	n.a.	8	0.0367	0.0358	0.0367	Cdh13, Cdh4, Celsr1, Dscaml1, Pcdhga4, Pcdhgc3, Ptprt, Sdk2
GO:0030154	BP	e	cell differentiation	23/318	932/32695	4.91e-05	n.a.	23	0.583	0.568	0.583	C77080, Ddx25, Edar, Ephb1, Ephb2, Erbb3, Erg, Mdga1, Musk, Nav1, Ngfr, Nkd1, Obscn, Prdm16, Raf1, Rarg, Scube1, Sik1, Sim2, Tcf12, Thoc5, Thra, Zfp521
GO:0051965	BP	e	positive regulation of synapse assembly	6/318	73/32695	7.95e-05	n.a.	6	0.944	0.92	0.944	Adgrb3, Asic2, Cux2, Ephb1, Ephb2, Ptprd
GO:0090129	BP	e	positive regulation of synapse maturation	3/318	10/32695	0.000104	n.a.	3	1	1	1	Camk2b, Dab2ip, Neurl1a
GO:0043113	BP	e	receptor clustering	4/318	31/32695	0.000225	n.a.	4	1	1	1	Cacna1a, Itgb2, Musk, Syngap1
GO:0048511	BP	e	rhythmic process	7/318	126/32695	0.000242	n.a.	7	1	1	1	Enox1, Kdm5a, Maged1, Ngfr, Npas2, Rorb, Sik1
GO:0014719	BP	e	skeletal muscle satellite cell activation	2/318	3/32695	0.000281	n.a.	2	1	1	1	Ephb1, Megf10
GO:0001764	BP	e	neuron migration	7/318	131/32695	0.000307	n.a.	7	1	1	1	Apbb2, Auts2, Celsr1, Itga3, Mdga1, Nav1, Sdccag8
GO:0021680	BP	e	cerebellar Purkinje cell layer development	3/318	15/32695	0.00038	n.a.	3	1	1	1	Cacna1a, Klhl1, Nfix
GO:0016339	BP	e	calcium-dependent cell-cell adhesion via plasma membrane cell adhesion molecules	4/318	37/32695	0.00045	n.a.	4	1	1	1	Cdh13, Cdh4, Pcdhga12, Pcdhgc3
GO:0035022	BP	e	positive regulation of Rac protein signal transduction	2/318	4/32695	0.000559	n.a.	2	1	1	1	Auts2, Dock2
GO:0021545	BP	e	cranial nerve development	2/318	4/32695	0.000559	n.a.	2	1	1	1	Ephb1, Erbb3
GO:0060236	BP	e	regulation of mitotic spindle organization	3/318	17/32695	0.00056	n.a.	3	1	1	1	Ankrd53, Dync1h1, Tpx2
GO:2001235	BP	e	positive regulation of apoptotic signaling pathway	4/318	40/32695	0.000609	n.a.	4	1	1	1	Camk2b, Dab2ip, Maged1, Ngfr
GO:0010633	BP	e	negative regulation of epithelial cell migration	3/318	18/32695	0.000667	n.a.	3	1	1	1	Dab2ip, Ptprg, Tgfbr3
GO:0060996	BP	e	dendritic spine development	3/318	18/32695	0.000667	n.a.	3	1	1	1	Arid1b, Ephb1, Ephb2
GO:0051932	BP	e	synaptic transmission, GABAergic	3/318	19/32695	0.000787	n.a.	3	1	1	1	Cacna1a, Gabrb2, Gabrg3
GO:0021631	BP	e	optic nerve morphogenesis	2/318	5/32695	0.000925	n.a.	2	1	1	1	Ephb1, Ephb2
GO:0007266	BP	e	Rho protein signal transduction	5/318	77/32695	0.00094	n.a.	5	1	1	1	Cdc42ep1, Cdh13, Celsr1, Kalrn, Ngfr
GO:0050766	BP	e	positive regulation of phagocytosis	4/318	45/32695	0.000956	n.a.	4	1	1	1	Abr, Dnm2, Dock2, Lman2
GO:0046580	BP	e	negative regulation of Ras protein signal transduction	3/318	21/32695	0.00106	n.a.	3	1	1	1	Dab2ip, Ephb2, Syngap1
GO:0033993	BP	e	response to lipid	3/318	22/32695	0.00122	n.a.	3	1	1	1	Ntsr1, Rarg, Thra
GO:0044351	BP	e	macropinocytosis	2/318	6/32695	0.00138	n.a.	2	1	1	1	Dnm2, Dock2
GO:0098815	BP	e	modulation of excitatory postsynaptic potential	2/318	6/32695	0.00138	n.a.	2	1	1	1	Tmem108, Zmynd8
GO:0007399	BP	e	nervous system development	11/318	381/32695	0.00138	n.a.	11	1	1	1	Arid1b, Dscaml1, Ephb1, Ephb2, Grip1, Kalrn, Mdga1, Nav1, Nav2, Ngfr, Tcf12
GO:0006468	BP	e	protein phosphorylation	14/318	565/32695	0.00141	n.a.	14	1	1	1	Adck1, Camk2b, Cdk17, Ephb1, Ephb2, Erbb3, Kalrn, Map3k10, Musk, Obscn, Raf1, Sgk2, Sik1, Strada
GO:0035176	BP	e	social behavior	4/318	50/32695	0.00142	n.a.	4	1	1	1	Atxn1, Grid1, Kalrn, Nrxn2
GO:0048168	BP	e	regulation of neuronal synaptic plasticity	3/318	24/32695	0.00159	n.a.	3	1	1	1	Ephb2, Kalrn, S100b
GO:0061003	BP	e	positive regulation of dendritic spine morphogenesis	3/318	24/32695	0.00159	n.a.	3	1	1	1	Camk2b, Cux2, Kalrn
GO:1903078	BP	e	positive regulation of protein localization to plasma membrane	4/318	52/32695	0.00165	n.a.	4	1	1	1	Ephb2, Ezr, Itga3, Lrp1
GO:0070509	BP	e	calcium ion import	3/318	25/32695	0.00179	n.a.	3	1	1	1	Cacna1a, Cacna1b, Slc8a1
GO:1904646	BP	e	cellular response to amyloid-beta	3/318	25/32695	0.00179	n.a.	3	1	1	1	Cacna1a, Lrp1, Ngfr
GO:0048170	BP	e	positive regulation of long-term neuronal synaptic plasticity	2/318	7/32695	0.00192	n.a.	2	1	1	1	Ephb2, Neurl1a
GO:0032224	BP	e	positive regulation of synaptic transmission, cholinergic	2/318	7/32695	0.00192	n.a.	2	1	1	1	Musk, Ngfr
GO:0007411	BP	e	axon guidance	6/318	134/32695	0.00205	n.a.	6	1	1	1	Apbb2, Cdh4, Ephb1, Ephb2, Ext1, Ngfr
GO:0007613	BP	e	memory	5/318	93/32695	0.00218	n.a.	5	1	1	1	Atxn1, Itga3, Kalrn, Musk, S100b
GO:0006898	BP	e	receptor-mediated endocytosis	4/318	57/32695	0.00231	n.a.	4	1	1	1	Dnm2, Lrp1, Snx9, Tmem108
GO:0030512	BP	e	negative regulation of transforming growth factor beta receptor signaling pathway	4/318	58/32695	0.00247	n.a.	4	1	1	1	Chst11, Dnm2, Prdm16, Tgfbr3
GO:0016310	BP	e	phosphorylation	14/318	602/32695	0.00252	n.a.	14	1	1	1	Adck1, Adk, Camk2b, Cdk17, Ephb1, Ephb2, Erbb3, Kalrn, Map3k10, Musk, Obscn, Raf1, Sgk2, Sik1
GO:0035148	BP	e	tube formation	2/318	8/32695	0.00254	n.a.	2	1	1	1	Dab2ip, Sdccag8
GO:0061037	BP	e	negative regulation of cartilage development	2/318	8/32695	0.00254	n.a.	2	1	1	1	Rarg, Wnt9a
GO:0070493	BP	e	thrombin-activated receptor signaling pathway	2/318	8/32695	0.00254	n.a.	2	1	1	1	F2, Iqgap2
GO:0006816	BP	e	calcium ion transport	6/318	140/32695	0.00255	n.a.	6	1	1	1	Cacna1a, Cacna1b, Camk2b, Myb, Slc8a1, Trpc7
GO:0032922	BP	e	circadian regulation of gene expression	4/318	59/32695	0.00262	n.a.	4	1	1	1	Kdm5a, Maged1, Ngfr, Npas2
GO:0050885	BP	e	neuromuscular process controlling balance	4/318	60/32695	0.00279	n.a.	4	1	1	1	Abr, Cacna1a, Camk2b, Camta1
GO:0006351	BP	e	transcription, DNA-templated	31/318	1841/32695	0.00304	n.a.	31	1	1	1	Anp32a, Arid1b, Atxn1, Auts2, Camta1, Crtc3, Cux2, Erg, Glis3, Hivep1, Hivep3, Kdm5a, Khdrbs2, Myb, Nfix, Npas2, Npas3, Prdm16, Ptov1, Rarg, Rorb, Sim2, Snd1, Tcf12, Tet1, Thra, Trerf1, Zfp46, Zfp516, Zfp521, Zfp579
GO:0008360	BP	e	regulation of cell shape	6/318	147/32695	0.00325	n.a.	6	1	1	1	Cdc42ep1, Cfdp1, Ezr, F2, Myo10, S100b
GO:0048169	BP	e	regulation of long-term neuronal synaptic plasticity	3/318	31/32695	0.00335	n.a.	3	1	1	1	Camk2b, S100b, Syngap1
GO:0043547	BP	e	positive regulation of GTPase activity	6/318	149/32695	0.00347	n.a.	6	1	1	1	Abr, Arap2, Arhgap6, Iqsec1, Kalrn, Snx9
GO:0000902	BP	e	cell morphogenesis	5/318	104/32695	0.00354	n.a.	5	1	1	1	Cdh13, Cdh4, Ephb2, Fry, Thoc5
GO:0007626	BP	e	locomotory behavior	5/318	105/32695	0.00369	n.a.	5	1	1	1	Cacna1b, Celsr1, Klhl1, Nav2, Npas3
GO:0006355	BP	e	regulation of transcription, DNA-templated	32/318	1934/32695	0.00375	n.a.	32	1	1	1	Anp32a, Apbb2, Arid1b, Atxn1, Auts2, Camta1, Crtc3, Cux2, Erg, Glis3, Hivep1, Hivep3, Kdm5a, Khdrbs2, Musk, Myb, Nfix, Npas2, Npas3, Prdm16, Ptov1, Rarg, Rorb, Sim2, Snd1, Tcf12, Tet1, Thra, Trerf1, Zfp516, Zfp521, Zfp579
GO:0009968	BP	e	negative regulation of signal transduction	5/318	106/32695	0.00384	n.a.	5	1	1	1	Ephb1, Ephb2, Erbb3, Musk, Ubash3b
GO:0008344	BP	e	adult locomotory behavior	4/318	66/32695	0.00394	n.a.	4	1	1	1	Atp1a2, Atxn1, Kalrn, Ntsr1
GO:0001771	BP	e	immunological synapse formation	2/318	10/32695	0.00403	n.a.	2	1	1	1	Dock2, Ephb1
GO:0008090	BP	e	retrograde axonal transport	2/318	10/32695	0.00403	n.a.	2	1	1	1	Dst, Tmem108
GO:0007270	BP	e	neuron-neuron synaptic transmission	2/318	10/32695	0.00403	n.a.	2	1	1	1	Arid1b, Cacna1a
GO:0097242	BP	e	amyloid-beta clearance	2/318	10/32695	0.00403	n.a.	2	1	1	1	Itgb2, Lrp1
GO:0006956	BP	e	complement activation	2/318	10/32695	0.00403	n.a.	2	1	1	1	C2, Cfb
GO:0043066	BP	e	negative regulation of apoptotic process	13/318	568/32695	0.00405	n.a.	13	1	1	1	Apbb2, Asic2, Chst11, Ephb1, Ephb2, Erbb3, Kitl, Musk, Ngfr, Ntsr1, Nuggc, Raf1, Rarg
GO:0007018	BP	e	microtubule-based movement	5/318	109/32695	0.00432	n.a.	5	1	1	1	Dnah8, Dync1h1, Kif17, Kif1a, Myo10
GO:0033674	BP	e	positive regulation of kinase activity	4/318	69/32695	0.00462	n.a.	4	1	1	1	Ephb1, Ephb2, Erbb3, Musk
GO:0050803	BP	e	regulation of synapse structure or activity	2/318	11/32695	0.00489	n.a.	2	1	1	1	Dnm2, Syngap1
GO:0097484	BP	e	dendrite extension	2/318	11/32695	0.00489	n.a.	2	1	1	1	Auts2, Tmem108
GO:0017145	BP	e	stem cell division	2/318	11/32695	0.00489	n.a.	2	1	1	1	Myb, Thoc5
GO:0007420	BP	e	brain development	6/318	160/32695	0.00491	n.a.	6	1	1	1	Abr, Atxn1, Dscaml1, Ext1, Rarg, Thra
GO:0006811	BP	e	ion transport	13/318	582/32695	0.00494	n.a.	13	1	1	1	Asic2, Atp1a2, Atp6v0d2, Cacna1a, Cacna1b, Gabrb2, Gabrg3, Grid1, Kcnj6, Scnn1g, Slc25a28, Slc8a1, Trpc7
GO:0043065	BP	e	positive regulation of apoptotic process	9/318	329/32695	0.0052	n.a.	9	1	1	1	Apbb2, Ctnnbl1, Dab2ip, Map3k10, Neurl1a, Ngfr, Ntsr1, Rarg, S100b
GO:0043524	BP	e	negative regulation of neuron apoptotic process	6/318	163/32695	0.00537	n.a.	6	1	1	1	Cacna1a, Erbb3, Gabrb2, Lrp1, Ngfr, Syngap1
GO:0006486	BP	e	protein glycosylation	4/318	72/32695	0.00538	n.a.	4	1	1	1	Ext1, Gcnt2, St3gal3, Uggt1
GO:0035023	BP	e	regulation of Rho protein signal transduction	4/318	72/32695	0.00538	n.a.	4	1	1	1	Abr, Arhgef10l, Kalrn, Obscn
GO:0060999	BP	e	positive regulation of dendritic spine development	3/318	37/32695	0.00555	n.a.	3	1	1	1	Kalrn, Neurl1a, Zmynd8
GO:0070373	BP	e	negative regulation of ERK1 and ERK2 cascade	4/318	73/32695	0.00565	n.a.	4	1	1	1	Cnksr3, Dab2ip, Ephb2, Ezr
GO:0036376	BP	e	sodium ion export across plasma membrane	2/318	12/32695	0.00584	n.a.	2	1	1	1	Atp1a2, Slc8a1
GO:0015012	BP	e	heparan sulfate proteoglycan biosynthetic process	2/318	12/32695	0.00584	n.a.	2	1	1	1	Ext1, Hs6st1
GO:0021952	BP	e	central nervous system projection neuron axonogenesis	2/318	12/32695	0.00584	n.a.	2	1	1	1	Ephb1, Ephb2
GO:0045732	BP	e	positive regulation of protein catabolic process	4/318	74/32695	0.00592	n.a.	4	1	1	1	Dab2ip, Fzr1, Lrp1, Nkd1
GO:0031623	BP	e	receptor internalization	3/318	38/32695	0.00598	n.a.	3	1	1	1	Dnm2, Ezr, Itgb2
GO:0060976	BP	e	coronary vasculature development	3/318	39/32695	0.00643	n.a.	3	1	1	1	Dnm2, Lrp1, Tgfbr3
GO:0097120	BP	e	receptor localization to synapse	2/318	13/32695	0.00685	n.a.	2	1	1	1	Anks1b, Cep112
GO:2001259	BP	e	positive regulation of cation channel activity	2/318	13/32695	0.00685	n.a.	2	1	1	1	Asic2, Ntsr1
GO:0046686	BP	e	response to cadmium ion	2/318	13/32695	0.00685	n.a.	2	1	1	1	Camk2b, Gss
GO:0016446	BP	e	somatic hypermutation of immunoglobulin genes	2/318	13/32695	0.00685	n.a.	2	1	1	1	Msh3, Nuggc
GO:0016358	BP	e	dendrite development	3/318	40/32695	0.0069	n.a.	3	1	1	1	Grip1, Klhl1, Syngap1
GO:0042391	BP	e	regulation of membrane potential	5/318	124/32695	0.00741	n.a.	5	1	1	1	Asic2, Cacna1a, Gabrb2, Gabrg3, Rims3
GO:0043087	BP	e	regulation of GTPase activity	4/318	79/32695	0.00745	n.a.	4	1	1	1	Arhgap6, Dab2ip, Iqgap2, Syngap1
GO:0003197	BP	e	endocardial cushion development	2/318	14/32695	0.00794	n.a.	2	1	1	1	Erbb3, Erg
GO:0050771	BP	e	negative regulation of axonogenesis	2/318	14/32695	0.00794	n.a.	2	1	1	1	Ephb2, Syngap1
GO:0051571	BP	e	positive regulation of histone H3-K4 methylation	2/318	14/32695	0.00794	n.a.	2	1	1	1	Auts2, Myb
GO:0035994	BP	e	response to muscle stretch	2/318	15/32695	0.00911	n.a.	2	1	1	1	Raf1, Slc8a1
GO:0017156	BP	e	calcium ion regulated exocytosis	2/318	15/32695	0.00911	n.a.	2	1	1	1	Cacna1a, Rims3
GO:0032963	BP	e	collagen metabolic process	2/318	15/32695	0.00911	n.a.	2	1	1	1	Tgfbr3, Tnxb
GO:0007416	BP	e	synapse assembly	3/318	45/32695	0.00957	n.a.	3	1	1	1	Cacna1a, Nrxn2, Sdk2
GO:0099645	BP	e	neurotransmitter receptor localization to postsynaptic specialization membrane	1/318	1/32695	0.00973	n.a.	1	1	1	1	Kalrn
GO:0014841	BP	e	skeletal muscle satellite cell proliferation	1/318	1/32695	0.00973	n.a.	1	1	1	1	Megf10
GO:0021814	BP	e	cell motility involved in cerebral cortex radial glia guided migration	1/318	1/32695	0.00973	n.a.	1	1	1	1	Dab2ip
GO:0017055	BP	e	negative regulation of RNA polymerase II transcriptional preinitiation complex assembly	1/318	1/32695	0.00973	n.a.	1	1	1	1	Thra
GO:1903280	BP	e	negative regulation of calcium:sodium antiporter activity	1/318	1/32695	0.00973	n.a.	1	1	1	1	Atp1a2
GO:0035611	BP	e	protein branching point deglutamylation	1/318	1/32695	0.00973	n.a.	1	1	1	1	Agbl5
GO:0046633	BP	e	alpha-beta T cell proliferation	1/318	1/32695	0.00973	n.a.	1	1	1	1	Dock2
GO:0010868	BP	e	negative regulation of triglyceride biosynthetic process	1/318	1/32695	0.00973	n.a.	1	1	1	1	Sik1
GO:0018063	BP	e	cytochrome c-heme linkage	1/318	1/32695	0.00973	n.a.	1	1	1	1	Hccs
GO:1904247	BP	e	positive regulation of polynucleotide adenylyltransferase activity	1/318	1/32695	0.00973	n.a.	1	1	1	1	Pabpn1
GO:0016261	BP	e	selenocysteine catabolic process	1/318	1/32695	0.00973	n.a.	1	1	1	1	Scly
GO:0051293	BP	e	establishment of spindle localization	1/318	1/32695	0.00973	n.a.	1	1	1	1	Dync1h1
GO:1902338	BP	e	negative regulation of apoptotic process involved in morphogenesis	1/318	1/32695	0.00973	n.a.	1	1	1	1	Tgfbr3
GO:0097026	BP	e	dendritic cell dendrite assembly	1/318	1/32695	0.00973	n.a.	1	1	1	1	Arid1b
GO:0002030	BP	e	inhibitory G-protein coupled receptor phosphorylation	1/318	1/32695	0.00973	n.a.	1	1	1	1	Camk2b
GO:1903452	BP	e	positive regulation of G1 to G0 transition	1/318	1/32695	0.00973	n.a.	1	1	1	1	Rab11fip4
GO:0071550	BP	e	death-inducing signaling complex assembly	1/318	1/32695	0.00973	n.a.	1	1	1	1	Raf1
GO:0021590	BP	e	cerebellum maturation	1/318	1/32695	0.00973	n.a.	1	1	1	1	Cacna1a
GO:0034201	BP	e	response to oleic acid	1/318	1/32695	0.00973	n.a.	1	1	1	1	Aacs
GO:0033002	BP	e	muscle cell proliferation	1/318	1/32695	0.00973	n.a.	1	1	1	1	Megf10
GO:0031335	BP	e	regulation of sulfur amino acid metabolic process	1/318	1/32695	0.00973	n.a.	1	1	1	1	Cacna1a
GO:0006175	BP	e	dATP biosynthetic process	1/318	1/32695	0.00973	n.a.	1	1	1	1	Adk
GO:0097106	BP	e	postsynaptic density organization	1/318	1/32695	0.00973	n.a.	1	1	1	1	Tmem108
GO:1903526	BP	e	negative regulation of membrane tubulation	1/318	1/32695	0.00973	n.a.	1	1	1	1	Dnm2
GO:0030860	BP	e	regulation of polarized epithelial cell differentiation	1/318	1/32695	0.00973	n.a.	1	1	1	1	Ajap1
GO:0060939	BP	e	epicardium-derived cardiac fibroblast cell development	1/318	1/32695	0.00973	n.a.	1	1	1	1	Tgfbr3
GO:0090251	BP	e	protein localization involved in establishment of planar polarity	1/318	1/32695	0.00973	n.a.	1	1	1	1	Celsr1
GO:0001766	BP	e	membrane raft polarization	1/318	1/32695	0.00973	n.a.	1	1	1	1	Dock2
GO:0021679	BP	e	cerebellar molecular layer development	1/318	1/32695	0.00973	n.a.	1	1	1	1	Cacna1a
GO:1901726	BP	e	negative regulation of histone deacetylase activity	1/318	1/32695	0.00973	n.a.	1	1	1	1	Kdm5a
GO:0099557	BP	e	trans-synaptic signaling by trans-synaptic complex, modulating synaptic transmission	1/318	1/32695	0.00973	n.a.	1	1	1	1	Ephb2
GO:0044557	BP	e	relaxation of smooth muscle	1/318	1/32695	0.00973	n.a.	1	1	1	1	Slc8a1
GO:0016024	BP	e	CDP-diacylglycerol biosynthetic process	1/318	1/32695	0.00973	n.a.	1	1	1	1	Cds1
GO:0034414	BP	e	tRNA 3'-trailer cleavage, endonucleolytic	1/318	1/32695	0.00973	n.a.	1	1	1	1	Elac1
GO:0044860	BP	e	protein localization to plasma membrane raft	1/318	1/32695	0.00973	n.a.	1	1	1	1	Flot2
GO:0097205	BP	e	renal filtration	1/318	1/32695	0.00973	n.a.	1	1	1	1	Itga3
GO:1901231	BP	e	positive regulation of non-canonical Wnt signaling pathway via JNK cascade	1/318	1/32695	0.00973	n.a.	1	1	1	1	Nkd1
GO:1901233	BP	e	negative regulation of convergent extension involved in axis elongation	1/318	1/32695	0.00973	n.a.	1	1	1	1	Nkd1
GO:0032354	BP	e	response to follicle-stimulating hormone	1/318	1/32695	0.00973	n.a.	1	1	1	1	Tgfbr3
GO:0032353	BP	e	negative regulation of hormone biosynthetic process	1/318	1/32695	0.00973	n.a.	1	1	1	1	Cacna1a
GO:1903408	BP	e	positive regulation of sodium:potassium-exchanging ATPase activity	1/318	1/32695	0.00973	n.a.	1	1	1	1	Dnm2
GO:1900383	BP	e	regulation of synaptic plasticity by receptor localization to synapse	1/318	1/32695	0.00973	n.a.	1	1	1	1	Anks1b
GO:0003025	BP	e	regulation of systemic arterial blood pressure by baroreceptor feedback	1/318	1/32695	0.00973	n.a.	1	1	1	1	Nav2
GO:0003026	BP	e	regulation of systemic arterial blood pressure by aortic arch baroreceptor feedback	1/318	1/32695	0.00973	n.a.	1	1	1	1	Asic2
GO:0071545	BP	e	inositol phosphate catabolic process	1/318	1/32695	0.00973	n.a.	1	1	1	1	Ntsr1
GO:0033037	BP	e	polysaccharide localization	1/318	1/32695	0.00973	n.a.	1	1	1	1	Chst11
GO:0060989	BP	e	lipid tube assembly involved in organelle fusion	1/318	1/32695	0.00973	n.a.	1	1	1	1	Pcdhga3
GO:0051838	BP	e	cytolysis by host of symbiont cells	1/318	1/32695	0.00973	n.a.	1	1	1	1	F2
GO:0000735	BP	e	removal of nonhomologous ends	1/318	1/32695	0.00973	n.a.	1	1	1	1	Msh3
GO:0021564	BP	e	vagus nerve development	1/318	1/32695	0.00973	n.a.	1	1	1	1	Nav2
GO:0021563	BP	e	glossopharyngeal nerve development	1/318	1/32695	0.00973	n.a.	1	1	1	1	Nav2
GO:0000165	BP	e	MAPK cascade	4/318	86/32695	0.00999	n.a.	4	1	1	1	Map3k10, Pabpn1, Raf1, Strada
GO:0007264	BP	e	small GTPase mediated signal transduction	4/318	87/32695	0.0104	n.a.	4	1	1	1	Arl3, Bcar3, Dock2, Rgl1
GO:0030199	BP	e	collagen fibril organization	3/318	47/32695	0.0108	n.a.	3	1	1	1	Col3a1, Loxl4, Tnxb
GO:0007162	BP	e	negative regulation of cell adhesion	3/318	47/32695	0.0108	n.a.	3	1	1	1	Cdh13, Dscaml1, Erbb3
GO:0007417	BP	e	central nervous system development	4/318	89/32695	0.0112	n.a.	4	1	1	1	Bcan, Celsr1, Dscaml1, Ngfr
GO:0050808	BP	e	synapse organization	3/318	48/32695	0.0114	n.a.	3	1	1	1	Pcdhgc3, Pcdhgc4, Pcdhgc5
GO:0031643	BP	e	positive regulation of myelination	2/318	17/32695	0.0116	n.a.	2	1	1	1	Ngfr, S100b
GO:0042711	BP	e	maternal behavior	2/318	17/32695	0.0116	n.a.	2	1	1	1	Kalrn, Npas3
GO:0002063	BP	e	chondrocyte development	2/318	17/32695	0.0116	n.a.	2	1	1	1	Chst11, Rarg
GO:0070588	BP	e	calcium ion transmembrane transport	4/318	90/32695	0.0117	n.a.	4	1	1	1	Cacna1a, Cacna1b, Slc8a1, Trpc7
GO:0042752	BP	e	regulation of circadian rhythm	3/318	49/32695	0.0121	n.a.	3	1	1	1	Maged1, Npas2, Rorb
GO:0051017	BP	e	actin filament bundle assembly	3/318	49/32695	0.0121	n.a.	3	1	1	1	Espnl, Ezr, Lima1
GO:0043410	BP	e	positive regulation of MAPK cascade	5/318	141/32695	0.0125	n.a.	5	1	1	1	Dab2ip, Ephb1, Ephb2, Erbb3, Ngfr
GO:0001933	BP	e	negative regulation of protein phosphorylation	4/318	92/32695	0.0126	n.a.	4	1	1	1	Ctdspl, Dab2ip, Ephb2, Ppp1r15b
GO:0070886	BP	e	positive regulation of calcineurin-NFAT signaling cascade	2/318	18/32695	0.013	n.a.	2	1	1	1	Camta1, Erbb3
GO:0050965	BP	e	detection of temperature stimulus involved in sensory perception of pain	2/318	18/32695	0.013	n.a.	2	1	1	1	Ephb1, Ntsr1
GO:0001953	BP	e	negative regulation of cell-matrix adhesion	2/318	18/32695	0.013	n.a.	2	1	1	1	Ajap1, Enpp2
GO:0048265	BP	e	response to pain	2/318	18/32695	0.013	n.a.	2	1	1	1	Cacna1a, Cacna1b
GO:0021987	BP	e	cerebral cortex development	3/318	51/32695	0.0135	n.a.	3	1	1	1	Ccdc85c, Col3a1, Mcph1
GO:0006909	BP	e	phagocytosis	3/318	52/32695	0.0142	n.a.	3	1	1	1	Dnm2, Itgb2, Megf10
GO:0031290	BP	e	retinal ganglion cell axon guidance	2/318	19/32695	0.0145	n.a.	2	1	1	1	Ephb1, Ephb2
GO:0032331	BP	e	negative regulation of chondrocyte differentiation	2/318	19/32695	0.0145	n.a.	2	1	1	1	Rarg, Wnt9a
GO:0043588	BP	e	skin development	3/318	53/32695	0.0149	n.a.	3	1	1	1	Col3a1, Itga3, Ngfr
GO:0060324	BP	e	face development	2/318	20/32695	0.016	n.a.	2	1	1	1	Raf1, Rarg
GO:0006883	BP	e	cellular sodium ion homeostasis	2/318	20/32695	0.016	n.a.	2	1	1	1	Atp1a2, Slc8a1
GO:0045104	BP	e	intermediate filament cytoskeleton organization	2/318	20/32695	0.016	n.a.	2	1	1	1	Dst, Raf1
GO:0006446	BP	e	regulation of translational initiation	2/318	20/32695	0.016	n.a.	2	1	1	1	Ctif, Ppp1r15b
GO:0060997	BP	e	dendritic spine morphogenesis	2/318	20/32695	0.016	n.a.	2	1	1	1	Ephb1, Ephb2
GO:0046328	BP	e	regulation of JNK cascade	2/318	20/32695	0.016	n.a.	2	1	1	1	Ephb1, Tgfbr3
GO:0010592	BP	e	positive regulation of lamellipodium assembly	2/318	20/32695	0.016	n.a.	2	1	1	1	Auts2, Dnm2
GO:0000122	BP	e	negative regulation of transcription by RNA polymerase II	15/318	807/32695	0.0164	n.a.	15	1	1	1	Atxn1, Cux2, Dab2ip, Ezr, Glis3, Hivep1, Kdm5a, Mcph1, Myb, Nfix, Prdm16, Rarg, Sik1, Sim2, Thra
GO:0050877	BP	e	nervous system process	3/318	55/32695	0.0165	n.a.	3	1	1	1	Cacna1a, Gabrb2, Gabrg3
GO:0048704	BP	e	embryonic skeletal system morphogenesis	3/318	56/32695	0.0173	n.a.	3	1	1	1	Chst11, Dscaml1, Wnt9a
GO:1903076	BP	e	regulation of protein localization to plasma membrane	2/318	21/32695	0.0175	n.a.	2	1	1	1	Camk2b, Kalrn
GO:0030178	BP	e	negative regulation of Wnt signaling pathway	3/318	57/32695	0.0181	n.a.	3	1	1	1	Lrp1, Nkd1, Wwox
GO:0045944	BP	e	positive regulation of transcription by RNA polymerase II	19/318	1116/32695	0.0185	n.a.	19	1	1	1	Atxn1, Auts2, Camta1, Cdh13, Crtc3, Dab2ip, Erg, Glis3, Myb, Nfix, Npas2, Npas3, Raf1, Rarg, Rorb, Tcf12, Tet1, Thra, Wwox
GO:0007520	BP	e	myoblast fusion	2/318	22/32695	0.0192	n.a.	2	1	1	1	Adgrb3, Fer1l5
GO:0002028	BP	e	regulation of sodium ion transport	2/318	22/32695	0.0192	n.a.	2	1	1	1	Sik1, Slc8a1
GO:2000620	BP	e	positive regulation of histone H4-K16 acetylation	1/318	2/32695	0.0194	n.a.	1	1	1	1	Auts2
GO:0106028	BP	e	neuron projection retraction	1/318	2/32695	0.0194	n.a.	1	1	1	1	Ephb2
GO:0060490	BP	e	lateral sprouting involved in lung morphogenesis	1/318	2/32695	0.0194	n.a.	1	1	1	1	Celsr1
GO:0046631	BP	e	alpha-beta T cell activation	1/318	2/32695	0.0194	n.a.	1	1	1	1	Dock2
GO:2000541	BP	e	positive regulation of protein geranylgeranylation	1/318	2/32695	0.0194	n.a.	1	1	1	1	Musk
GO:1903905	BP	e	positive regulation of establishment of T cell polarity	1/318	2/32695	0.0194	n.a.	1	1	1	1	Flot2
GO:1902412	BP	e	regulation of mitotic cytokinesis	1/318	2/32695	0.0194	n.a.	1	1	1	1	Ankrd53
GO:1903416	BP	e	response to glycoside	1/318	2/32695	0.0194	n.a.	1	1	1	1	Atp1a2
GO:0045875	BP	e	negative regulation of sister chromatid cohesion	1/318	2/32695	0.0194	n.a.	1	1	1	1	Recql4
GO:0042779	BP	e	tRNA 3'-trailer cleavage	1/318	2/32695	0.0194	n.a.	1	1	1	1	Elac1
GO:0050906	BP	e	detection of stimulus involved in sensory perception	1/318	2/32695	0.0194	n.a.	1	1	1	1	Ppef2
GO:0098840	BP	e	protein transport along microtubule	1/318	2/32695	0.0194	n.a.	1	1	1	1	Kif1a
GO:0048250	BP	e	iron import into the mitochondrion	1/318	2/32695	0.0194	n.a.	1	1	1	1	Slc25a28
GO:1905167	BP	e	positive regulation of lysosomal protein catabolic process	1/318	2/32695	0.0194	n.a.	1	1	1	1	Lrp1
GO:0034699	BP	e	response to luteinizing hormone	1/318	2/32695	0.0194	n.a.	1	1	1	1	Tgfbr3
GO:1903646	BP	e	positive regulation of chaperone-mediated protein folding	1/318	2/32695	0.0194	n.a.	1	1	1	1	Sgtb
GO:1902723	BP	e	negative regulation of skeletal muscle satellite cell proliferation	1/318	2/32695	0.0194	n.a.	1	1	1	1	Ephb1
GO:1902725	BP	e	negative regulation of satellite cell differentiation	1/318	2/32695	0.0194	n.a.	1	1	1	1	Ephb1
GO:0043314	BP	e	negative regulation of neutrophil degranulation	1/318	2/32695	0.0194	n.a.	1	1	1	1	Abr
GO:0007354	BP	e	zygotic determination of anterior/posterior axis, embryo	1/318	2/32695	0.0194	n.a.	1	1	1	1	Pcsk6
GO:0003430	BP	e	growth plate cartilage chondrocyte growth	1/318	2/32695	0.0194	n.a.	1	1	1	1	Rarg
GO:0032222	BP	e	regulation of synaptic transmission, cholinergic	1/318	2/32695	0.0194	n.a.	1	1	1	1	Camk2b
GO:0035907	BP	e	dorsal aorta development	1/318	2/32695	0.0194	n.a.	1	1	1	1	Ngfr
GO:0045624	BP	e	positive regulation of T-helper cell differentiation	1/318	2/32695	0.0194	n.a.	1	1	1	1	Myb
GO:0021750	BP	e	vestibular nucleus development	1/318	2/32695	0.0194	n.a.	1	1	1	1	Cacna1a
GO:0032429	BP	e	regulation of phospholipase A2 activity	1/318	2/32695	0.0194	n.a.	1	1	1	1	Lrp1
GO:0035608	BP	e	protein deglutamylation	1/318	2/32695	0.0194	n.a.	1	1	1	1	Agbl5
GO:0098885	BP	e	modification of postsynaptic actin cytoskeleton	1/318	2/32695	0.0194	n.a.	1	1	1	1	Kalrn
GO:0086064	BP	e	cell communication by electrical coupling involved in cardiac conduction	1/318	2/32695	0.0194	n.a.	1	1	1	1	Slc8a1
GO:0060488	BP	e	orthogonal dichotomous subdivision of terminal units involved in lung branching morphogenesis	1/318	2/32695	0.0194	n.a.	1	1	1	1	Celsr1
GO:0060489	BP	e	planar dichotomous subdivision of terminal units involved in lung branching morphogenesis	1/318	2/32695	0.0194	n.a.	1	1	1	1	Celsr1
GO:0060313	BP	e	negative regulation of blood vessel remodeling	1/318	2/32695	0.0194	n.a.	1	1	1	1	Abr
GO:0099558	BP	e	maintenance of synapse structure	1/318	2/32695	0.0194	n.a.	1	1	1	1	Adgrb3
GO:0072382	BP	e	minus-end-directed vesicle transport along microtubule	1/318	2/32695	0.0194	n.a.	1	1	1	1	Dync1h1
GO:0090218	BP	e	positive regulation of lipid kinase activity	1/318	2/32695	0.0194	n.a.	1	1	1	1	F2
GO:2001273	BP	e	regulation of glucose import in response to insulin stimulus	1/318	2/32695	0.0194	n.a.	1	1	1	1	Ngfr
GO:0045887	BP	e	positive regulation of synaptic growth at neuromuscular junction	1/318	2/32695	0.0194	n.a.	1	1	1	1	Musk
GO:0098582	BP	e	innate vocalization behavior	1/318	2/32695	0.0194	n.a.	1	1	1	1	Auts2
GO:0032370	BP	e	positive regulation of lipid transport	1/318	2/32695	0.0194	n.a.	1	1	1	1	Lrp1
GO:0060466	BP	e	activation of meiosis involved in egg activation	1/318	2/32695	0.0194	n.a.	1	1	1	1	Camk2b
GO:0014056	BP	e	regulation of acetylcholine secretion, neurotransmission	1/318	2/32695	0.0194	n.a.	1	1	1	1	Cacna1a
GO:0071918	BP	e	urea transmembrane transport	1/318	2/32695	0.0194	n.a.	1	1	1	1	Slc14a1
GO:0042745	BP	e	circadian sleep/wake cycle	1/318	2/32695	0.0194	n.a.	1	1	1	1	Npas2
GO:0036324	BP	e	vascular endothelial growth factor receptor-2 signaling pathway	1/318	2/32695	0.0194	n.a.	1	1	1	1	Dab2ip
GO:0071048	BP	e	nuclear retention of unspliced pre-mRNA at the site of transcription	1/318	2/32695	0.0194	n.a.	1	1	1	1	Exosc10
GO:0042488	BP	e	positive regulation of odontogenesis of dentin-containing tooth	1/318	2/32695	0.0194	n.a.	1	1	1	1	Ngfr
GO:0002692	BP	e	negative regulation of cellular extravasation	1/318	2/32695	0.0194	n.a.	1	1	1	1	Abr
GO:0033032	BP	e	regulation of myeloid cell apoptotic process	1/318	2/32695	0.0194	n.a.	1	1	1	1	Thra
GO:0051389	BP	e	inactivation of MAPKK activity	1/318	2/32695	0.0194	n.a.	1	1	1	1	Ephb2
GO:0001504	BP	e	neurotransmitter uptake	1/318	2/32695	0.0194	n.a.	1	1	1	1	Atp1a2
GO:1904782	BP	e	negative regulation of NMDA glutamate receptor activity	1/318	2/32695	0.0194	n.a.	1	1	1	1	Ephb2
GO:2000143	BP	e	negative regulation of DNA-templated transcription, initiation	1/318	2/32695	0.0194	n.a.	1	1	1	1	Thra
GO:0033692	BP	e	cellular polysaccharide biosynthetic process	1/318	2/32695	0.0194	n.a.	1	1	1	1	Ext1
GO:0055025	BP	e	positive regulation of cardiac muscle tissue development	1/318	2/32695	0.0194	n.a.	1	1	1	1	Erbb3
GO:0032902	BP	e	nerve growth factor production	1/318	2/32695	0.0194	n.a.	1	1	1	1	Pcsk6
GO:0007611	BP	e	learning or memory	3/318	59/32695	0.0198	n.a.	3	1	1	1	Ephb2, S100b, Thra
GO:0045892	BP	e	negative regulation of transcription, DNA-templated	11/318	529/32695	0.0207	n.a.	11	1	1	1	Atxn1, Cux2, Dab2ip, Hivep1, Maged1, Map3k10, Myb, Prdm16, Rorb, Sim2, Thra
GO:0007169	BP	e	transmembrane receptor protein tyrosine kinase signaling pathway	4/318	107/32695	0.0207	n.a.	4	1	1	1	Ephb1, Ephb2, Erbb3, Ptprt
GO:0002026	BP	e	regulation of the force of heart contraction	2/318	23/32695	0.0209	n.a.	2	1	1	1	Atp1a2, Slc8a1
GO:1900273	BP	e	positive regulation of long-term synaptic potentiation	2/318	24/32695	0.0226	n.a.	2	1	1	1	Ephb2, Kalrn
GO:0043393	BP	e	regulation of protein binding	2/318	24/32695	0.0226	n.a.	2	1	1	1	Tgfbr3, Ubash3b
GO:0044331	BP	e	cell-cell adhesion mediated by cadherin	2/318	24/32695	0.0226	n.a.	2	1	1	1	Cdh13, Cdh4
GO:0009612	BP	e	response to mechanical stimulus	2/318	24/32695	0.0226	n.a.	2	1	1	1	Asic2, Kalrn
GO:0048593	BP	e	camera-type eye morphogenesis	2/318	24/32695	0.0226	n.a.	2	1	1	1	Ephb1, Ephb2
GO:0010719	BP	e	negative regulation of epithelial to mesenchymal transition	2/318	25/32695	0.0244	n.a.	2	1	1	1	Dab2ip, Tgfbr3
GO:0051481	BP	e	negative regulation of cytosolic calcium ion concentration	2/318	25/32695	0.0244	n.a.	2	1	1	1	Atp1a2, Slc8a1
GO:0007214	BP	e	gamma-aminobutyric acid signaling pathway	2/318	25/32695	0.0244	n.a.	2	1	1	1	Cacna1a, Gabrg3
GO:0008542	BP	e	visual learning	3/318	64/32695	0.0246	n.a.	3	1	1	1	Atp1a2, Atxn1, Syngap1
GO:0007612	BP	e	learning	3/318	64/32695	0.0246	n.a.	3	1	1	1	Atxn1, Ephb2, Ntsr1
GO:0030878	BP	e	thyroid gland development	2/318	26/32695	0.0263	n.a.	2	1	1	1	Raf1, Thra
GO:0008016	BP	e	regulation of heart contraction	2/318	26/32695	0.0263	n.a.	2	1	1	1	Cacna1b, Thra
GO:0043542	BP	e	endothelial cell migration	2/318	26/32695	0.0263	n.a.	2	1	1	1	Cdh13, Itgb2
GO:0060716	BP	e	labyrinthine layer blood vessel development	2/318	26/32695	0.0263	n.a.	2	1	1	1	Esx1, Hs6st1
GO:1900182	BP	e	positive regulation of protein localization to nucleus	2/318	27/32695	0.0282	n.a.	2	1	1	1	F2, Ngfr
GO:0007269	BP	e	neurotransmitter secretion	2/318	27/32695	0.0282	n.a.	2	1	1	1	Cacna1b, Nrxn2
GO:0032430	BP	e	positive regulation of phospholipase A2 activity	1/318	3/32695	0.0289	n.a.	1	1	1	1	Camk2b
GO:0051048	BP	e	negative regulation of secretion	1/318	3/32695	0.0289	n.a.	1	1	1	1	Erbb3
GO:0042249	BP	e	establishment of planar polarity of embryonic epithelium	1/318	3/32695	0.0289	n.a.	1	1	1	1	Celsr1
GO:1900041	BP	e	negative regulation of interleukin-2 secretion	1/318	3/32695	0.0289	n.a.	1	1	1	1	Ezr
GO:0061368	BP	e	behavioral response to formalin induced pain	1/318	3/32695	0.0289	n.a.	1	1	1	1	Kalrn
GO:1902992	BP	e	negative regulation of amyloid precursor protein catabolic process	1/318	3/32695	0.0289	n.a.	1	1	1	1	Flot2
GO:0008050	BP	e	female courtship behavior	1/318	3/32695	0.0289	n.a.	1	1	1	1	Thra
GO:0098900	BP	e	regulation of action potential	1/318	3/32695	0.0289	n.a.	1	1	1	1	Ntsr1
GO:0010020	BP	e	chloroplast fission	1/318	3/32695	0.0289	n.a.	1	1	1	1	Dnm2
GO:0060623	BP	e	regulation of chromosome condensation	1/318	3/32695	0.0289	n.a.	1	1	1	1	Mcph1
GO:0048641	BP	e	regulation of skeletal muscle tissue development	1/318	3/32695	0.0289	n.a.	1	1	1	1	Megf10
GO:0043506	BP	e	regulation of JUN kinase activity	1/318	3/32695	0.0289	n.a.	1	1	1	1	Tnxb
GO:0055096	BP	e	low-density lipoprotein particle mediated signaling	1/318	3/32695	0.0289	n.a.	1	1	1	1	Cdh13
GO:0001887	BP	e	selenium compound metabolic process	1/318	3/32695	0.0289	n.a.	1	1	1	1	Scly
GO:0002763	BP	e	positive regulation of myeloid leukocyte differentiation	1/318	3/32695	0.0289	n.a.	1	1	1	1	Kitl
GO:0006211	BP	e	5-methylcytosine catabolic process	1/318	3/32695	0.0289	n.a.	1	1	1	1	Tet1
GO:0050883	BP	e	musculoskeletal movement, spinal reflex action	1/318	3/32695	0.0289	n.a.	1	1	1	1	Cacna1a
GO:0060215	BP	e	primitive hemopoiesis	1/318	3/32695	0.0289	n.a.	1	1	1	1	Thoc5
GO:0014816	BP	e	skeletal muscle satellite cell differentiation	1/318	3/32695	0.0289	n.a.	1	1	1	1	Megf10
GO:1903170	BP	e	negative regulation of calcium ion transmembrane transport	1/318	3/32695	0.0289	n.a.	1	1	1	1	Atp1a2
GO:0090310	BP	e	negative regulation of methylation-dependent chromatin silencing	1/318	3/32695	0.0289	n.a.	1	1	1	1	Tet1
GO:0002265	BP	e	astrocyte activation involved in immune response	1/318	3/32695	0.0289	n.a.	1	1	1	1	Lrp1
GO:0045988	BP	e	negative regulation of striated muscle contraction	1/318	3/32695	0.0289	n.a.	1	1	1	1	Atp1a2
GO:0051799	BP	e	negative regulation of hair follicle development	1/318	3/32695	0.0289	n.a.	1	1	1	1	Ngfr
GO:0007181	BP	e	transforming growth factor beta receptor complex assembly	1/318	3/32695	0.0289	n.a.	1	1	1	1	Tgfbr3
GO:1900408	BP	e	negative regulation of cellular response to oxidative stress	1/318	3/32695	0.0289	n.a.	1	1	1	1	Scly
GO:0002154	BP	e	thyroid hormone mediated signaling pathway	1/318	3/32695	0.0289	n.a.	1	1	1	1	Thra
GO:0001951	BP	e	intestinal D-glucose absorption	1/318	3/32695	0.0289	n.a.	1	1	1	1	Ezr
GO:1903758	BP	e	negative regulation of transcription from RNA polymerase II promoter by histone modification	1/318	3/32695	0.0289	n.a.	1	1	1	1	Zmynd8
GO:0098971	BP	e	anterograde dendritic transport of neurotransmitter receptor complex	1/318	3/32695	0.0289	n.a.	1	1	1	1	Kif17
GO:0070593	BP	e	dendrite self-avoidance	1/318	3/32695	0.0289	n.a.	1	1	1	1	Dscaml1
GO:0002068	BP	e	glandular epithelial cell development	1/318	3/32695	0.0289	n.a.	1	1	1	1	Rarg
GO:0097752	BP	e	regulation of DNA stability	1/318	3/32695	0.0289	n.a.	1	1	1	1	Nuggc
GO:0043114	BP	e	regulation of vascular permeability	1/318	3/32695	0.0289	n.a.	1	1	1	1	Abr
GO:0051495	BP	e	positive regulation of cytoskeleton organization	1/318	3/32695	0.0289	n.a.	1	1	1	1	Pfdn2
GO:1902856	BP	e	negative regulation of non-motile cilium assembly	1/318	3/32695	0.0289	n.a.	1	1	1	1	Dnm2
GO:0043553	BP	e	negative regulation of phosphatidylinositol 3-kinase activity	1/318	3/32695	0.0289	n.a.	1	1	1	1	Dab2ip
GO:0046487	BP	e	glyoxylate metabolic process	1/318	3/32695	0.0289	n.a.	1	1	1	1	Grhpr
GO:0016445	BP	e	somatic diversification of immunoglobulins	1/318	3/32695	0.0289	n.a.	1	1	1	1	Ctnnbl1
GO:0003347	BP	e	epicardial cell to mesenchymal cell transition	1/318	3/32695	0.0289	n.a.	1	1	1	1	Tgfbr3
GO:0060988	BP	e	lipid tube assembly	1/318	3/32695	0.0289	n.a.	1	1	1	1	Snx9
GO:0014829	BP	e	vascular smooth muscle contraction	1/318	3/32695	0.0289	n.a.	1	1	1	1	Slc8a1
GO:0072697	BP	e	protein localization to cell cortex	1/318	3/32695	0.0289	n.a.	1	1	1	1	Ezr
GO:1902896	BP	e	terminal web assembly	1/318	3/32695	0.0289	n.a.	1	1	1	1	Ezr
GO:0002277	BP	e	myeloid dendritic cell activation involved in immune response	1/318	3/32695	0.0289	n.a.	1	1	1	1	Dock2
GO:0030317	BP	e	flagellated sperm motility	3/318	69/32695	0.0298	n.a.	3	1	1	1	Inpp5b, Neurl1a, Pldi
GO:0015991	BP	e	ATP hydrolysis coupled proton transport	2/318	28/32695	0.0302	n.a.	2	1	1	1	Atp1a2, Atp6v0d2
GO:0007229	BP	e	integrin-mediated signaling pathway	3/318	70/32695	0.0309	n.a.	3	1	1	1	Col3a1, Itga3, Itgb2
GO:0006814	BP	e	sodium ion transport	4/318	122/32695	0.0316	n.a.	4	1	1	1	Asic2, Atp1a2, Scnn1g, Slc8a1
GO:0001889	BP	e	liver development	3/318	71/32695	0.0321	n.a.	3	1	1	1	Aacs, Rarg, Tgfbr3
GO:0048791	BP	e	calcium ion-regulated exocytosis of neurotransmitter	2/318	29/32695	0.0322	n.a.	2	1	1	1	Cacna1a, Rims3
GO:0042073	BP	e	intraciliary transport	2/318	29/32695	0.0322	n.a.	2	1	1	1	Arl3, Kif17
GO:0050770	BP	e	regulation of axonogenesis	2/318	29/32695	0.0322	n.a.	2	1	1	1	Cacna1a, Ephb2
GO:0034332	BP	e	adherens junction organization	2/318	29/32695	0.0322	n.a.	2	1	1	1	Cdh13, Cdh4
GO:0045807	BP	e	positive regulation of endocytosis	2/318	29/32695	0.0322	n.a.	2	1	1	1	Dnm2, Lrp1
GO:0050680	BP	e	negative regulation of epithelial cell proliferation	3/318	72/32695	0.0332	n.a.	3	1	1	1	Dab2ip, Maged1, Tgfbr3
GO:0060021	BP	e	roof of mouth development	3/318	72/32695	0.0332	n.a.	3	1	1	1	Ephb2, Prdm16, Tgfbr3
GO:0001824	BP	e	blastocyst development	2/318	30/32695	0.0343	n.a.	2	1	1	1	Tgfbr3, Thoc5
GO:0051491	BP	e	positive regulation of filopodium assembly	2/318	30/32695	0.0343	n.a.	2	1	1	1	Neurl1a, Zmynd8
GO:0035025	BP	e	positive regulation of Rho protein signal transduction	2/318	30/32695	0.0343	n.a.	2	1	1	1	Col3a1, Ngfr
GO:0009409	BP	e	response to cold	2/318	30/32695	0.0343	n.a.	2	1	1	1	Thra, Zfp516
GO:0007268	BP	e	chemical synaptic transmission	5/318	184/32695	0.0345	n.a.	5	1	1	1	Cacna1a, Cacna1b, Gabrb2, Gabrg3, Nrxn2
GO:0042472	BP	e	inner ear morphogenesis	3/318	74/32695	0.0356	n.a.	3	1	1	1	Abr, Celsr1, Ephb2
GO:0042060	BP	e	wound healing	3/318	74/32695	0.0356	n.a.	3	1	1	1	Celsr1, Col3a1, Dst
GO:0019233	BP	e	sensory perception of pain	3/318	74/32695	0.0356	n.a.	3	1	1	1	Cacna1a, Cacna1b, Ngfr
GO:0010468	BP	e	regulation of gene expression	7/318	316/32695	0.0358	n.a.	7	1	1	1	F2, Mcph1, Myb, Ngfr, Rarg, Thoc5, Zfp521
GO:0045746	BP	e	negative regulation of Notch signaling pathway	2/318	31/32695	0.0364	n.a.	2	1	1	1	Kctd10, Neurl1a
GO:0050775	BP	e	positive regulation of dendrite morphogenesis	2/318	31/32695	0.0364	n.a.	2	1	1	1	Cux2, Ptprd
GO:0048013	BP	e	ephrin receptor signaling pathway	2/318	31/32695	0.0364	n.a.	2	1	1	1	Ephb1, Ephb2
GO:0034220	BP	e	ion transmembrane transport	3/318	75/32695	0.0368	n.a.	3	1	1	1	Asic2, Gabrb2, Gabrg3
GO:0048812	BP	e	neuron projection morphogenesis	3/318	76/32695	0.0381	n.a.	3	1	1	1	Dab2ip, Dnm2, Strada
GO:0001568	BP	e	blood vessel development	3/318	76/32695	0.0381	n.a.	3	1	1	1	Col3a1, Esx1, Tgfbr3
GO:0007165	BP	e	signal transduction	20/318	1261/32695	0.0382	n.a.	20	1	1	1	Abr, Adgrb3, Arap2, Arhgap6, Celsr1, Dab2ip, Erbb3, Gabrb2, Gabrg3, Gpr101, Grasp, Inpp5b, Iqgap2, Ngfr, Ntsr1, Ppp1r12b, Raf1, Rgl1, Scube1, Syngap1
GO:0003199	BP	e	endocardial cushion to mesenchymal transition involved in heart valve formation	1/318	4/32695	0.0383	n.a.	1	1	1	1	Erg
GO:0060125	BP	e	negative regulation of growth hormone secretion	1/318	4/32695	0.0383	n.a.	1	1	1	1	Kalrn
GO:1904395	BP	e	positive regulation of skeletal muscle acetylcholine-gated channel clustering	1/318	4/32695	0.0383	n.a.	1	1	1	1	Musk
GO:0031503	BP	e	protein-containing complex localization	1/318	4/32695	0.0383	n.a.	1	1	1	1	Kif17
GO:1990416	BP	e	cellular response to brain-derived neurotrophic factor stimulus	1/318	4/32695	0.0383	n.a.	1	1	1	1	Tmem108
GO:2000504	BP	e	positive regulation of blood vessel remodeling	1/318	4/32695	0.0383	n.a.	1	1	1	1	Erg
GO:0034638	BP	e	phosphatidylcholine catabolic process	1/318	4/32695	0.0383	n.a.	1	1	1	1	Enpp2
GO:2000587	BP	e	negative regulation of platelet-derived growth factor receptor-beta signaling pathway	1/318	4/32695	0.0383	n.a.	1	1	1	1	Lrp1
GO:0070668	BP	e	positive regulation of mast cell proliferation	1/318	4/32695	0.0383	n.a.	1	1	1	1	Kitl
GO:0001826	BP	e	inner cell mass cell differentiation	1/318	4/32695	0.0383	n.a.	1	1	1	1	Tet1
GO:0045123	BP	e	cellular extravasation	1/318	4/32695	0.0383	n.a.	1	1	1	1	Itgb2
GO:1902115	BP	e	regulation of organelle assembly	1/318	4/32695	0.0383	n.a.	1	1	1	1	Ezr
GO:0060024	BP	e	rhythmic synaptic transmission	1/318	4/32695	0.0383	n.a.	1	1	1	1	Cacna1a
GO:0048858	BP	e	cell projection morphogenesis	1/318	4/32695	0.0383	n.a.	1	1	1	1	Camk2b
GO:0098989	BP	e	NMDA selective glutamate receptor signaling pathway	1/318	4/32695	0.0383	n.a.	1	1	1	1	Kalrn
GO:0070384	BP	e	Harderian gland development	1/318	4/32695	0.0383	n.a.	1	1	1	1	Rarg
GO:0071034	BP	e	CUT catabolic process	1/318	4/32695	0.0383	n.a.	1	1	1	1	Exosc10
GO:0097066	BP	e	response to thyroid hormone	1/318	4/32695	0.0383	n.a.	1	1	1	1	Cfb
GO:0033026	BP	e	negative regulation of mast cell apoptotic process	1/318	4/32695	0.0383	n.a.	1	1	1	1	Kitl
GO:2000427	BP	e	positive regulation of apoptotic cell clearance	1/318	4/32695	0.0383	n.a.	1	1	1	1	C2
GO:0030204	BP	e	chondroitin sulfate metabolic process	1/318	4/32695	0.0383	n.a.	1	1	1	1	Chst11
GO:1901660	BP	e	calcium ion export	1/318	4/32695	0.0383	n.a.	1	1	1	1	Slc8a1
GO:0043315	BP	e	positive regulation of neutrophil degranulation	1/318	4/32695	0.0383	n.a.	1	1	1	1	Itgb2
GO:0060534	BP	e	trachea cartilage development	1/318	4/32695	0.0383	n.a.	1	1	1	1	Rarg
GO:0006942	BP	e	regulation of striated muscle contraction	1/318	4/32695	0.0383	n.a.	1	1	1	1	Atp1a2
GO:0016185	BP	e	synaptic vesicle budding from presynaptic endocytic zone membrane	1/318	4/32695	0.0383	n.a.	1	1	1	1	Dnm2
GO:0060137	BP	e	maternal process involved in parturition	1/318	4/32695	0.0383	n.a.	1	1	1	1	Kalrn
GO:0098884	BP	e	postsynaptic neurotransmitter receptor internalization	1/318	4/32695	0.0383	n.a.	1	1	1	1	Dnm2
GO:0060318	BP	e	definitive erythrocyte differentiation	1/318	4/32695	0.0383	n.a.	1	1	1	1	Tgfbr3
GO:0035088	BP	e	establishment or maintenance of apical/basal cell polarity	1/318	4/32695	0.0383	n.a.	1	1	1	1	Ezr
GO:1902742	BP	e	apoptotic process involved in development	1/318	4/32695	0.0383	n.a.	1	1	1	1	Megf10
GO:0060977	BP	e	coronary vasculature morphogenesis	1/318	4/32695	0.0383	n.a.	1	1	1	1	Tgfbr3
GO:0043648	BP	e	dicarboxylic acid metabolic process	1/318	4/32695	0.0383	n.a.	1	1	1	1	Grhpr
GO:0016048	BP	e	detection of temperature stimulus	1/318	4/32695	0.0383	n.a.	1	1	1	1	Ngfr
GO:1903588	BP	e	negative regulation of blood vessel endothelial cell proliferation involved in sprouting angiogenesis	1/318	4/32695	0.0383	n.a.	1	1	1	1	Ngfr
GO:0048105	BP	e	establishment of body hair planar orientation	1/318	4/32695	0.0383	n.a.	1	1	1	1	Celsr1
GO:0050994	BP	e	regulation of lipid catabolic process	1/318	4/32695	0.0383	n.a.	1	1	1	1	Thra
GO:0010817	BP	e	regulation of hormone levels	1/318	4/32695	0.0383	n.a.	1	1	1	1	Cacna1a
GO:0070317	BP	e	negative regulation of G0 to G1 transition	1/318	4/32695	0.0383	n.a.	1	1	1	1	Dab2ip
GO:1990048	BP	e	anterograde neuronal dense core vesicle transport	1/318	4/32695	0.0383	n.a.	1	1	1	1	Kif1a
GO:0043622	BP	e	cortical microtubule organization	1/318	4/32695	0.0383	n.a.	1	1	1	1	Ezr
GO:0072498	BP	e	embryonic skeletal joint development	1/318	4/32695	0.0383	n.a.	1	1	1	1	Ext1
GO:0014051	BP	e	gamma-aminobutyric acid secretion	1/318	4/32695	0.0383	n.a.	1	1	1	1	Cacna1a
GO:2000002	BP	e	negative regulation of DNA damage checkpoint	1/318	4/32695	0.0383	n.a.	1	1	1	1	Thoc5
GO:1900738	BP	e	positive regulation of phospholipase C-activating G-protein coupled receptor signaling pathway	1/318	4/32695	0.0383	n.a.	1	1	1	1	F2
GO:0031345	BP	e	negative regulation of cell projection organization	1/318	4/32695	0.0383	n.a.	1	1	1	1	Itga3
GO:0038026	BP	e	reelin-mediated signaling pathway	1/318	4/32695	0.0383	n.a.	1	1	1	1	Dab2ip
GO:0000710	BP	e	meiotic mismatch repair	1/318	4/32695	0.0383	n.a.	1	1	1	1	Msh3
GO:1904783	BP	e	positive regulation of NMDA glutamate receptor activity	1/318	4/32695	0.0383	n.a.	1	1	1	1	Ephb2
GO:1904872	BP	e	regulation of telomerase RNA localization to Cajal body	1/318	4/32695	0.0383	n.a.	1	1	1	1	Exosc10
GO:0060713	BP	e	labyrinthine layer morphogenesis	1/318	4/32695	0.0383	n.a.	1	1	1	1	Esx1
GO:1902897	BP	e	regulation of postsynaptic density protein 95 clustering	1/318	4/32695	0.0383	n.a.	1	1	1	1	Zmynd8
GO:0006166	BP	e	purine ribonucleoside salvage	1/318	4/32695	0.0383	n.a.	1	1	1	1	Adk
GO:0006417	BP	e	regulation of translation	4/318	130/32695	0.0385	n.a.	4	1	1	1	Ctif, Ddx25, Neurl1a, Ppp1r15b
GO:1900026	BP	e	positive regulation of substrate adhesion-dependent cell spreading	2/318	32/32695	0.0386	n.a.	2	1	1	1	Dnm2, Enpp2
GO:0050806	BP	e	positive regulation of synaptic transmission	2/318	32/32695	0.0386	n.a.	2	1	1	1	Rims3, S100b
GO:0070372	BP	e	regulation of ERK1 and ERK2 cascade	2/318	32/32695	0.0386	n.a.	2	1	1	1	Ephb1, Tgfbr3
GO:0007595	BP	e	lactation	2/318	32/32695	0.0386	n.a.	2	1	1	1	Kalrn, Neurl1a
GO:0010977	BP	e	negative regulation of neuron projection development	3/318	77/32695	0.0394	n.a.	3	1	1	1	Lrp1, Ngfr, Ptprg
GO:0046330	BP	e	positive regulation of JNK cascade	3/318	77/32695	0.0394	n.a.	3	1	1	1	Dab2ip, Edar, Map3k10
GO:0030198	BP	e	extracellular matrix organization	4/318	131/32695	0.0394	n.a.	4	1	1	1	Apbb2, Col15a1, Col3a1, Tnxb
GO:0007179	BP	e	transforming growth factor beta receptor signaling pathway	3/318	78/32695	0.0406	n.a.	3	1	1	1	Col3a1, Gcnt2, Tgfbr3
GO:0008219	BP	e	cell death	2/318	33/32695	0.0408	n.a.	2	1	1	1	Cacna1a, Map3k10
GO:0035249	BP	e	synaptic transmission, glutamatergic	2/318	33/32695	0.0408	n.a.	2	1	1	1	Cacna1a, Grid1
GO:2000463	BP	e	positive regulation of excitatory postsynaptic potential	2/318	33/32695	0.0408	n.a.	2	1	1	1	Cux2, Ngfr
GO:0051281	BP	e	positive regulation of release of sequestered calcium ion into cytosol	2/318	33/32695	0.0408	n.a.	2	1	1	1	F2, Ntsr1
GO:0048015	BP	e	phosphatidylinositol-mediated signaling	2/318	33/32695	0.0408	n.a.	2	1	1	1	Ezr, Pitpnm2
GO:0008284	BP	e	positive regulation of cell proliferation	10/318	535/32695	0.0429	n.a.	10	1	1	1	Enpp2, F2, Fzr1, Gcnt2, Kitl, Rarg, Recql4, S100b, Tet1, Tgfbr3
GO:0000184	BP	e	nuclear-transcribed mRNA catabolic process, nonsense-mediated decay	2/318	34/32695	0.0431	n.a.	2	1	1	1	Ctif, Exosc10
GO:0030168	BP	e	platelet activation	2/318	34/32695	0.0431	n.a.	2	1	1	1	F2, Ubash3b
GO:0006406	BP	e	mRNA export from nucleus	2/318	34/32695	0.0431	n.a.	2	1	1	1	Ddx25, Thoc5
GO:0009611	BP	e	response to wounding	3/318	80/32695	0.0433	n.a.	3	1	1	1	F2, Mirt1, Ngfr
GO:0034765	BP	e	regulation of ion transmembrane transport	4/318	136/32695	0.0442	n.a.	4	1	1	1	Asic2, Cacna1a, Cacna1b, Kcnj6
GO:0050873	BP	e	brown fat cell differentiation	2/318	35/32695	0.0455	n.a.	2	1	1	1	Prdm16, Zfp516
GO:0019229	BP	e	regulation of vasoconstriction	2/318	35/32695	0.0455	n.a.	2	1	1	1	Asic2, Atp1a2
GO:0015914	BP	e	phospholipid transport	2/318	35/32695	0.0455	n.a.	2	1	1	1	Pitpnm1, Pitpnm2
GO:0030010	BP	e	establishment of cell polarity	2/318	35/32695	0.0455	n.a.	2	1	1	1	Ephb1, Sdccag8
GO:0010628	BP	e	positive regulation of gene expression	9/318	453/32695	0.0458	n.a.	9	1	1	1	Cux2, Edar, Ephb2, Erbb3, Ezr, Itga3, Musk, Rarg, Tcf12
GO:0007160	BP	e	cell-matrix adhesion	3/318	82/32695	0.046	n.a.	3	1	1	1	Col3a1, Itgb2, Tnxb
GO:0090344	BP	e	negative regulation of cell aging	1/318	5/32695	0.0477	n.a.	1	1	1	1	Fzr1
GO:0018101	BP	e	protein citrullination	1/318	5/32695	0.0477	n.a.	1	1	1	1	Padi1
GO:0051660	BP	e	establishment of centrosome localization	1/318	5/32695	0.0477	n.a.	1	1	1	1	Ezr
GO:0051668	BP	e	localization within membrane	1/318	5/32695	0.0477	n.a.	1	1	1	1	Cdh13
GO:0036438	BP	e	maintenance of lens transparency	1/318	5/32695	0.0477	n.a.	1	1	1	1	Gcnt2
GO:0036414	BP	e	histone citrullination	1/318	5/32695	0.0477	n.a.	1	1	1	1	Padi1
GO:0042035	BP	e	regulation of cytokine biosynthetic process	1/318	5/32695	0.0477	n.a.	1	1	1	1	S100b
GO:0043654	BP	e	recognition of apoptotic cell	1/318	5/32695	0.0477	n.a.	1	1	1	1	Megf10
GO:0008582	BP	e	regulation of synaptic growth at neuromuscular junction	1/318	5/32695	0.0477	n.a.	1	1	1	1	Musk
GO:0031581	BP	e	hemidesmosome assembly	1/318	5/32695	0.0477	n.a.	1	1	1	1	Dst
GO:1905832	BP	e	positive regulation of spindle assembly	1/318	5/32695	0.0477	n.a.	1	1	1	1	Dync1h1
GO:0060414	BP	e	aorta smooth muscle tissue morphogenesis	1/318	5/32695	0.0477	n.a.	1	1	1	1	Col3a1
GO:1904428	BP	e	negative regulation of tubulin deacetylation	1/318	5/32695	0.0477	n.a.	1	1	1	1	Fry
GO:0051096	BP	e	positive regulation of helicase activity	1/318	5/32695	0.0477	n.a.	1	1	1	1	Msh3
GO:0034695	BP	e	response to prostaglandin E	1/318	5/32695	0.0477	n.a.	1	1	1	1	Tgfbr3
GO:0003376	BP	e	sphingosine-1-phosphate signaling pathway	1/318	5/32695	0.0477	n.a.	1	1	1	1	Ezr
GO:0060219	BP	e	camera-type eye photoreceptor cell differentiation	1/318	5/32695	0.0477	n.a.	1	1	1	1	Sdk2
GO:0021554	BP	e	optic nerve development	1/318	5/32695	0.0477	n.a.	1	1	1	1	Nav2
GO:0098735	BP	e	positive regulation of the force of heart contraction	1/318	5/32695	0.0477	n.a.	1	1	1	1	Slc8a1
GO:0098712	BP	e	L-glutamate import across plasma membrane	1/318	5/32695	0.0477	n.a.	1	1	1	1	Ntsr1
GO:0001768	BP	e	establishment of T cell polarity	1/318	5/32695	0.0477	n.a.	1	1	1	1	Dock2
GO:0002155	BP	e	regulation of thyroid hormone mediated signaling pathway	1/318	5/32695	0.0477	n.a.	1	1	1	1	Thra
GO:0070779	BP	e	D-aspartate import across plasma membrane	1/318	5/32695	0.0477	n.a.	1	1	1	1	Ntsr1
GO:0051964	BP	e	negative regulation of synapse assembly	1/318	5/32695	0.0477	n.a.	1	1	1	1	Mdga1
GO:0018057	BP	e	peptidyl-lysine oxidation	1/318	5/32695	0.0477	n.a.	1	1	1	1	Loxl4
GO:0015015	BP	e	heparan sulfate proteoglycan biosynthetic process, enzymatic modification	1/318	5/32695	0.0477	n.a.	1	1	1	1	Hs6st1
GO:0015014	BP	e	heparan sulfate proteoglycan biosynthetic process, polysaccharide chain biosynthetic process	1/318	5/32695	0.0477	n.a.	1	1	1	1	Ext1
GO:1903753	BP	e	negative regulation of p38MAPK cascade	1/318	5/32695	0.0477	n.a.	1	1	1	1	Ezr
GO:0034315	BP	e	regulation of Arp2/3 complex-mediated actin nucleation	1/318	5/32695	0.0477	n.a.	1	1	1	1	Arfip1
GO:0090235	BP	e	regulation of metaphase plate congression	1/318	5/32695	0.0477	n.a.	1	1	1	1	Dync1h1
GO:0090238	BP	e	positive regulation of arachidonic acid secretion	1/318	5/32695	0.0477	n.a.	1	1	1	1	Ntsr1
GO:0051902	BP	e	negative regulation of mitochondrial depolarization	1/318	5/32695	0.0477	n.a.	1	1	1	1	Ngfr
GO:0061743	BP	e	motor learning	1/318	5/32695	0.0477	n.a.	1	1	1	1	Adgrb3
GO:1903912	BP	e	negative regulation of endoplasmic reticulum stress-induced eIF2 alpha phosphorylation	1/318	5/32695	0.0477	n.a.	1	1	1	1	Ppp1r15b
GO:0043111	BP	e	replication fork arrest	1/318	5/32695	0.0477	n.a.	1	1	1	1	Msh3
GO:0032374	BP	e	regulation of cholesterol transport	1/318	5/32695	0.0477	n.a.	1	1	1	1	Lrp1
GO:0015840	BP	e	urea transport	1/318	5/32695	0.0477	n.a.	1	1	1	1	Slc14a1
GO:1990049	BP	e	retrograde neuronal dense core vesicle transport	1/318	5/32695	0.0477	n.a.	1	1	1	1	Kif1a
GO:0038065	BP	e	collagen-activated signaling pathway	1/318	5/32695	0.0477	n.a.	1	1	1	1	Ubash3b
GO:1900223	BP	e	positive regulation of amyloid-beta clearance	1/318	5/32695	0.0477	n.a.	1	1	1	1	Lrp1
GO:0043570	BP	e	maintenance of DNA repeat elements	1/318	5/32695	0.0477	n.a.	1	1	1	1	Msh3
GO:0050915	BP	e	sensory perception of sour taste	1/318	5/32695	0.0477	n.a.	1	1	1	1	Asic2
GO:0070945	BP	e	neutrophil mediated killing of gram-negative bacterium	1/318	5/32695	0.0477	n.a.	1	1	1	1	F2
GO:0046959	BP	e	habituation	1/318	5/32695	0.0477	n.a.	1	1	1	1	Kalrn
GO:0042461	BP	e	photoreceptor cell development	1/318	5/32695	0.0477	n.a.	1	1	1	1	Arl3
GO:0045636	BP	e	positive regulation of melanocyte differentiation	1/318	5/32695	0.0477	n.a.	1	1	1	1	Kitl
GO:0045637	BP	e	regulation of myeloid cell differentiation	1/318	5/32695	0.0477	n.a.	1	1	1	1	Rarg
GO:1904645	BP	e	response to amyloid-beta	1/318	5/32695	0.0477	n.a.	1	1	1	1	Cacna1a
GO:0006086	BP	e	acetyl-CoA biosynthetic process from pyruvate	1/318	5/32695	0.0477	n.a.	1	1	1	1	Dlat
GO:2000370	BP	e	positive regulation of clathrin-dependent endocytosis	1/318	5/32695	0.0477	n.a.	1	1	1	1	Dnm2
GO:0050974	BP	e	detection of mechanical stimulus involved in sensory perception	1/318	5/32695	0.0477	n.a.	1	1	1	1	Asic2
GO:1902952	BP	e	positive regulation of dendritic spine maintenance	1/318	5/32695	0.0477	n.a.	1	1	1	1	Zmynd8
GO:0000733	BP	e	DNA strand renaturation	1/318	5/32695	0.0477	n.a.	1	1	1	1	Recql4
GO:0071313	BP	e	cellular response to caffeine	1/318	5/32695	0.0477	n.a.	1	1	1	1	Slc8a1
GO:0071320	BP	e	cellular response to cAMP	2/318	36/32695	0.0478	n.a.	2	1	1	1	Ezr, Slc8a1
GO:0045880	BP	e	positive regulation of smoothened signaling pathway	2/318	36/32695	0.0478	n.a.	2	1	1	1	Scube1, Wnt9a
GO:0051924	BP	e	regulation of calcium ion transport	2/318	36/32695	0.0478	n.a.	2	1	1	1	Cacna1b, Slc8a1
GO:0014070	BP	e	response to organic cyclic compound	2/318	36/32695	0.0478	n.a.	2	1	1	1	Aacs, Cacna1b
GO:0007043	BP	e	cell-cell junction assembly	2/318	36/32695	0.0478	n.a.	2	1	1	1	Cdh13, Cdh4
GO:0006629	BP	e	lipid metabolic process	9/318	465/32695	0.0496	n.a.	9	1	1	1	Aacs, B4galnt1, Cds1, Enpp2, Lypla2, Pisd, Plin1, Scly, Tnxb
GO:0007608	BP	p	sensory perception of smell	1/318	1114/32695	0.000454	n.a.	1	1	1	1	Nav2
GO:0007186	BP	p	G-protein coupled receptor signaling pathway	4/318	1651/32695	0.000672	n.a.	4	1	1	1	Adgrb3, Celsr1, Gpr101, Ntsr1

## Sheet: GO of DR-ameliorate hypo DMGs
# Generated by GOATOOLS v0.8.4 (2019-06-09)
# min_ratio=None pval=0.05
GO	NS	enrichment	name	ratio_in_study	ratio_in_pop	p_uncorrected	depth	study_count	p_bonferroni	p_sidak	p_holm	study_items
GO:0030036	BP	e	actin cytoskeleton organization	12/390	159/32695	5.18e-07	n.a.	12	0.00615	0.00599	0.00615	Ablim2, Arhgap26, Capzb, Cdc42bpb, Elmo1, Itpka, Mtss1, Pak4, Srf, Tbck, Wasl, Wdr1
GO:0007155	BP	e	cell adhesion	21/390	518/32695	1.4e-06	n.a.	21	0.0166	0.0162	0.0166	Azgp1, Boc, Cadm3, Cdh13, Dsc3, Dscam, Dscaml1, Dst, Ephb1, Gm37013, Itga9, Lama3, Lama5, Mybpc3, Mybph, Ninj2, Ntm, Pecam1, Prkce, Spon1, Tgfbi
GO:0035556	BP	e	intracellular signal transduction	19/390	397/32695	1.69e-06	n.a.	19	0.02	0.0195	0.02	Arhgef7, Asb18, Camkk1, Cdc42bpb, Cspg4, Dgkz, Mapk4, Mark1, Nlrc5, Nrg2, Prkce, Rassf5, Rps6ka4, Shc2, Sik3, Stac, Stk32a, Tns2, Vav2
GO:0045332	BP	e	phospholipid translocation	5/390	24/32695	8.3e-06	n.a.	5	0.0985	0.0961	0.0985	Abca4, Abca7, Abcc1, Atp8a2, Atp9a
GO:0060081	BP	e	membrane hyperpolarization	4/390	13/32695	1.31e-05	n.a.	4	0.155	0.151	0.155	Atp1a1, Cacng2, Kctd7, Park7
GO:0016310	BP	e	phosphorylation	21/390	602/32695	1.4e-05	n.a.	21	0.166	0.162	0.166	Ak5, Ak7, Camk2a, Camkk1, Cdc42bpb, Dgkz, Ephb1, Hk1, Insr, Itpka, Map3k14, Mapk4, Mark1, Musk, Pak4, Prkce, Rps6ka4, Sik3, Stk32a, Taok3, Trio
GO:0006468	BP	e	protein phosphorylation	20/390	565/32695	1.82e-05	n.a.	20	0.216	0.211	0.216	Camk2a, Camkk1, Cdc42bpb, Ephb1, Hk1, Insr, Map3k14, Mapk4, Mark1, Musk, Pak4, Pik3r1, Prkce, Rps6ka4, Sik3, Smad1, Stk32a, Taok3, Tbck, Trio
GO:0051384	BP	e	response to glucocorticoid	5/390	30/32695	2.62e-05	n.a.	5	0.312	0.304	0.311	Agl, Cpn1, Fas, Pik3r1, Rxra
GO:0030032	BP	e	lamellipodium assembly	5/390	33/32695	4.24e-05	n.a.	5	0.504	0.491	0.503	Ablim2, Arhgef7, Capzb, Cdh13, Vav2
GO:0045944	BP	e	positive regulation of transcription by RNA polymerase II	30/390	1116/32695	5.3e-05	n.a.	30	0.63	0.614	0.629	Ablim2, Aym1, Bmp5, Bmp7, Cdh13, Creb3l2, Dot1l, Elf5, Glis1, Hif3a, Ncoa2, Nfatc2, Nfkb1, Nlrc5, Ntf3, Park7, Pax5, Pbx1, Pik3r1, Psmd9, Rps6ka4, Runx1, Rxra, Sall2, Smad1, Srf, Tead1, Zbtb38, Zfp750, Zmiz2
GO:0008285	BP	e	negative regulation of cell proliferation	15/390	379/32695	5.89e-05	n.a.	15	0.699	0.681	0.698	Asph, Bmp5, Bmp7, Cdh13, Fam129b, Magi2, Pmp22, Rassf5, Runx1, Rxra, Sh3bp4, Slit3, Smad1, Srf, Tns2
GO:0003281	BP	e	ventricular septum development	5/390	38/32695	8.55e-05	n.a.	5	1	0.989	1	Gja5, Ltbp1, Pde2a, Sufu, Trip11
GO:0098970	BP	e	postsynaptic neurotransmitter receptor diffusion trapping	3/390	9/32695	0.000134	n.a.	3	1	1	1	Cacng2, Cacng5, Camk2a
GO:0030834	BP	e	regulation of actin filament depolymerization	2/390	2/32695	0.000142	n.a.	2	1	1	1	Sh3bp1, Wdr1
GO:1905069	BP	e	allantois development	2/390	2/32695	0.000142	n.a.	2	1	1	1	Bmp5, Bmp7
GO:0045893	BP	e	positive regulation of transcription, DNA-templated	19/390	613/32695	0.000168	n.a.	19	1	1	1	Afap1l2, Asph, Atmin, Bmp7, Creb3l2, Fam129b, Ghrh, Glis1, Insr, Nfatc2, Nfkb1, Pax5, Prdm16, Psmd9, Runx1, Rxra, Srf, Tead1, Zfhx2
GO:0045010	BP	e	actin nucleation	3/390	11/32695	0.000259	n.a.	3	1	1	1	Fmn1, Gsn, Wasl
GO:0051127	BP	e	positive regulation of actin nucleation	3/390	11/32695	0.000259	n.a.	3	1	1	1	Fmn1, Gsn, Wasl
GO:1902895	BP	e	positive regulation of pri-miRNA transcription by RNA polymerase II	4/390	29/32695	0.000374	n.a.	4	1	1	1	Nfkb1, Smad1, Srf, Tead1
GO:0009887	BP	e	animal organ morphogenesis	7/390	112/32695	0.000403	n.a.	7	1	1	1	Bmp7, Insr, Lama5, Pax5, Pbx1, Slit3, Wnt10a
GO:0021502	BP	e	neural fold elevation formation	2/390	3/32695	0.000422	n.a.	2	1	1	1	Bmp5, Bmp7
GO:0009992	BP	e	cellular water homeostasis	2/390	3/32695	0.000422	n.a.	2	1	1	1	Anxa7, Slc6a12
GO:0070593	BP	e	dendrite self-avoidance	2/390	3/32695	0.000422	n.a.	2	1	1	1	Dscam, Dscaml1
GO:0006911	BP	e	phagocytosis, engulfment	4/390	31/32695	0.000486	n.a.	4	1	1	1	Elmo1, Fcgr1, Gsn, Sh3bp1
GO:2001013	BP	e	epithelial cell proliferation involved in renal tubule morphogenesis	2/390	4/32695	0.000838	n.a.	2	1	1	1	Lgr5, Mtss1
GO:0042552	BP	e	myelination	5/390	64/32695	0.00101	n.a.	5	1	1	1	Cmtm8, Mbp, Ntf3, Pmp22, Xk
GO:0045995	BP	e	regulation of embryonic development	3/390	17/32695	0.00101	n.a.	3	1	1	1	Insr, Lama3, Lama5
GO:0051693	BP	e	actin filament capping	3/390	18/32695	0.0012	n.a.	3	1	1	1	Capzb, Gsn, Sptb
GO:0060037	BP	e	pharyngeal system development	3/390	18/32695	0.0012	n.a.	3	1	1	1	Bmp5, Bmp7, Ece1
GO:0030155	BP	e	regulation of cell adhesion	4/390	40/32695	0.0013	n.a.	4	1	1	1	Gsn, Lama3, Lama5, Srf
GO:2001269	BP	e	positive regulation of cysteine-type endopeptidase activity involved in apoptotic signaling pathway	2/390	5/32695	0.00139	n.a.	2	1	1	1	Fas, Gsn
GO:0031581	BP	e	hemidesmosome assembly	2/390	5/32695	0.00139	n.a.	2	1	1	1	Dst, Lama3
GO:0006816	BP	e	calcium ion transport	7/390	140/32695	0.00151	n.a.	7	1	1	1	Anxa6, Cacna1c, Cacng2, Cacng5, Camk2a, Itpr2, Slc24a3
GO:0006355	BP	e	regulation of transcription, DNA-templated	39/390	1934/32695	0.00156	n.a.	39	1	1	1	Atmin, Bcor, Chd6, Creb3l2, Elf5, Eya2, Foxp4, Glis1, Hif3a, Hr, Il16, Insr, Irf9, Irx4, Jdp2, Mapk8ip1, Musk, Ncoa2, Nfatc2, Nfkb1, Pax5, Pbx1, Prdm16, Raly, Rfx8, Rps6ka4, Runx1, Rxra, Sall2, Scml4, Smad1, Srf, Tada1, Tead1, Vgll4, Wasl, Zbtb38, Zfhx2, Zfp750
GO:0006486	BP	e	protein glycosylation	5/390	72/32695	0.00171	n.a.	5	1	1	1	Alg1, Extl3, St6galnac6, St8sia3, Trip11
GO:0016311	BP	e	dephosphorylation	6/390	108/32695	0.00191	n.a.	6	1	1	1	Dusp11, Nanp, Pgp, Ppp4c, Ptpre, Ptprn2
GO:0032147	BP	e	activation of protein kinase activity	5/390	75/32695	0.00205	n.a.	5	1	1	1	Camkk1, Insr, Map3k14, Pak4, Taok3
GO:0003272	BP	e	endocardial cushion formation	2/390	6/32695	0.00206	n.a.	2	1	1	1	Bmp5, Bmp7
GO:0010815	BP	e	bradykinin catabolic process	2/390	6/32695	0.00206	n.a.	2	1	1	1	Cpn1, Ece1
GO:0030252	BP	e	growth hormone secretion	2/390	6/32695	0.00206	n.a.	2	1	1	1	Cacna1c, Ghrh
GO:0098609	BP	e	cell-cell adhesion	6/390	110/32695	0.0021	n.a.	6	1	1	1	Boc, Kirrel2, Lama3, Lims2, Srf, Vezt
GO:0030902	BP	e	hindbrain development	3/390	22/32695	0.00219	n.a.	3	1	1	1	Bmp5, Bmp7, Smad1
GO:0010977	BP	e	negative regulation of neuron projection development	5/390	77/32695	0.0023	n.a.	5	1	1	1	Cspg4, Kank1, Ntm, Pmp22, Rap1gap2
GO:0048813	BP	e	dendrite morphogenesis	4/390	47/32695	0.00237	n.a.	4	1	1	1	Camk2a, Dscam, Farp1, Fmn1
GO:0007162	BP	e	negative regulation of cell adhesion	4/390	47/32695	0.00237	n.a.	4	1	1	1	Cdh13, Dscam, Dscaml1, Pik3r1
GO:0007275	BP	e	multicellular organism development	25/390	1095/32695	0.00247	n.a.	25	1	1	1	Bmp5, Bmp7, Cdh13, Cep131, Creb3l2, Cspg4, D130043K22Rik, Ephb1, Eya2, Farp1, Hif3a, Insr, Irx4, Musk, Nnat, Paqr8, Pax5, Pbx1, Sall2, Slit3, Srf, Ssc5d, Sufu, Vezt, Wnt10a
GO:0002931	BP	e	response to ischemia	3/390	24/32695	0.00283	n.a.	3	1	1	1	Camk2a, Hk1, Rcan1
GO:0098943	BP	e	neurotransmitter receptor transport, postsynaptic endosome to lysosome	2/390	7/32695	0.00286	n.a.	2	1	1	1	Cacng2, Cacng5
GO:0060687	BP	e	regulation of branching involved in prostate gland morphogenesis	2/390	7/32695	0.00286	n.a.	2	1	1	1	Bmp7, Rxra
GO:0051280	BP	e	negative regulation of release of sequestered calcium ion into cytosol	2/390	7/32695	0.00286	n.a.	2	1	1	1	Fcrl5, Prkce
GO:0007021	BP	e	tubulin complex assembly	2/390	7/32695	0.00286	n.a.	2	1	1	1	Tbce, Vbp1
GO:0010669	BP	e	epithelial structure maintenance	2/390	7/32695	0.00286	n.a.	2	1	1	1	Crocc, Srf
GO:0043457	BP	e	regulation of cellular respiration	2/390	7/32695	0.00286	n.a.	2	1	1	1	Cisd1, Prdm16
GO:0000187	BP	e	activation of MAPK activity	5/390	81/32695	0.00287	n.a.	5	1	1	1	Cspg4, Insr, Lpar3, Ntf3, Shc2
GO:0007015	BP	e	actin filament organization	6/390	120/32695	0.00324	n.a.	6	1	1	1	Arhgap6, Mtss1, Mybpc3, Sh3bp1, Srf, Wasl
GO:0007507	BP	e	heart development	9/390	250/32695	0.00329	n.a.	9	1	1	1	Bcor, Cacna1c, Ece1, Foxp4, Irx4, Pde2a, Rxra, Srf, Tead1
GO:0010628	BP	e	positive regulation of gene expression	13/390	453/32695	0.00338	n.a.	13	1	1	1	Alox12, Atmin, Bmp7, Creb3l2, Gsn, Musk, Nfatc2, Nfkb1, Park7, Pde2a, Pik3r1, Smad1, Wnt10a
GO:0032024	BP	e	positive regulation of insulin secretion	4/390	52/32695	0.00344	n.a.	4	1	1	1	Ghrh, Nnat, Prkce, Psmd9
GO:0035904	BP	e	aorta development	3/390	26/32695	0.00357	n.a.	3	1	1	1	Ltbp1, Pde2a, Sufu
GO:0000165	BP	e	MAPK cascade	5/390	86/32695	0.00372	n.a.	5	1	1	1	Mbp, Ppm1l, Rhbdd3, Smad1, Taok3
GO:1901522	BP	e	positive regulation of transcription from RNA polymerase II promoter involved in cellular response to chemical stimulus	2/390	8/32695	0.00379	n.a.	2	1	1	1	Rxra, Smad1
GO:0060485	BP	e	mesenchyme development	2/390	8/32695	0.00379	n.a.	2	1	1	1	Bmp7, Rxra
GO:0099590	BP	e	neurotransmitter receptor internalization	2/390	8/32695	0.00379	n.a.	2	1	1	1	Cacng2, Cacng5
GO:0003344	BP	e	pericardium morphogenesis	2/390	8/32695	0.00379	n.a.	2	1	1	1	Bmp5, Bmp7
GO:0009651	BP	e	response to salt stress	2/390	8/32695	0.00379	n.a.	2	1	1	1	Anxa7, Nedd4l
GO:0030030	BP	e	cell projection organization	7/390	169/32695	0.00432	n.a.	7	1	1	1	2700049A03Rik, Ak7, Boc, Capzb, Cep131, Crocc, Gsn
GO:0070588	BP	e	calcium ion transmembrane transport	5/390	90/32695	0.00452	n.a.	5	1	1	1	Asph, Cacna1c, Cacng2, Itpr2, Slc24a3
GO:0007156	BP	e	homophilic cell adhesion via plasma membrane adhesion molecules	5/390	91/32695	0.00473	n.a.	5	1	1	1	Cadm3, Cdh13, Dsc3, Dscaml1, Pecam1
GO:0030853	BP	e	negative regulation of granulocyte differentiation	2/390	9/32695	0.00483	n.a.	2	1	1	1	Prdm16, Runx1
GO:0009142	BP	e	nucleoside triphosphate biosynthetic process	2/390	9/32695	0.00483	n.a.	2	1	1	1	Ak5, Ak7
GO:0001574	BP	e	ganglioside biosynthetic process	2/390	9/32695	0.00483	n.a.	2	1	1	1	St6galnac6, St8sia3
GO:0097062	BP	e	dendritic spine maintenance	2/390	9/32695	0.00483	n.a.	2	1	1	1	Insr, Itpka
GO:0061384	BP	e	heart trabecula morphogenesis	2/390	9/32695	0.00483	n.a.	2	1	1	1	Bmp5, Bmp7
GO:0034260	BP	e	negative regulation of GTPase activity	3/390	29/32695	0.00489	n.a.	3	1	1	1	Pecam1, Ptprn2, Sh3bp4
GO:0009100	BP	e	glycoprotein metabolic process	2/390	10/32695	0.00599	n.a.	2	1	1	1	St6galnac6, St8sia3
GO:0008090	BP	e	retrograde axonal transport	2/390	10/32695	0.00599	n.a.	2	1	1	1	Bsn, Dst
GO:0061337	BP	e	cardiac conduction	2/390	10/32695	0.00599	n.a.	2	1	1	1	Cacna1c, Gja5
GO:0060710	BP	e	chorio-allantoic fusion	2/390	10/32695	0.00599	n.a.	2	1	1	1	Bmp5, Bmp7
GO:0016477	BP	e	cell migration	8/390	229/32695	0.00649	n.a.	8	1	1	1	Cdc42bpb, Elmo1, Lama5, Nfatc2, Pak4, Pik3c2b, Sh3bp1, Vav2
GO:0090136	BP	e	epithelial cell-cell adhesion	2/390	11/32695	0.00727	n.a.	2	1	1	1	Plekha7, Srf
GO:0060124	BP	e	positive regulation of growth hormone secretion	2/390	11/32695	0.00727	n.a.	2	1	1	1	Arhgef7, Ghrh
GO:0097746	BP	e	regulation of blood vessel diameter	2/390	11/32695	0.00727	n.a.	2	1	1	1	Ece1, Gja5
GO:0010656	BP	e	negative regulation of muscle cell apoptotic process	2/390	11/32695	0.00727	n.a.	2	1	1	1	Alox12, Pik3r1
GO:0038180	BP	e	nerve growth factor signaling pathway	2/390	11/32695	0.00727	n.a.	2	1	1	1	Magi2, Ntf3
GO:0033700	BP	e	phospholipid efflux	2/390	11/32695	0.00727	n.a.	2	1	1	1	Abca7, Abcc1
GO:0033314	BP	e	mitotic DNA replication checkpoint	2/390	11/32695	0.00727	n.a.	2	1	1	1	Cdc6, Topbp1
GO:0032060	BP	e	bleb assembly	2/390	11/32695	0.00727	n.a.	2	1	1	1	Lpar3, Pmp22
GO:0006470	BP	e	protein dephosphorylation	6/390	144/32695	0.0078	n.a.	6	1	1	1	Dusp11, Eya2, Pgp, Ppm1l, Ptpre, Ptprn2
GO:0016070	BP	e	RNA metabolic process	2/390	12/32695	0.00865	n.a.	2	1	1	1	Dusp11, Rnaseh2a
GO:0043586	BP	e	tongue development	2/390	12/32695	0.00865	n.a.	2	1	1	1	Prdm16, Wnt10a
GO:0033173	BP	e	calcineurin-NFAT signaling cascade	2/390	12/32695	0.00865	n.a.	2	1	1	1	Nfatc2, Rcan1
GO:0007169	BP	e	transmembrane receptor protein tyrosine kinase signaling pathway	5/390	107/32695	0.00928	n.a.	5	1	1	1	Cspg4, Ephb1, Insr, Ntf3, Shc2
GO:0086005	BP	e	ventricular cardiac muscle cell action potential	2/390	13/32695	0.0101	n.a.	2	1	1	1	Gja5, Nedd4l
GO:0097284	BP	e	hepatocyte apoptotic process	2/390	13/32695	0.0101	n.a.	2	1	1	1	Fas, Gsn
GO:2001259	BP	e	positive regulation of cation channel activity	2/390	13/32695	0.0101	n.a.	2	1	1	1	Nedd4l, Stac
GO:0009311	BP	e	oligosaccharide metabolic process	2/390	13/32695	0.0101	n.a.	2	1	1	1	St6galnac6, St8sia3
GO:0050930	BP	e	induction of positive chemotaxis	2/390	13/32695	0.0101	n.a.	2	1	1	1	Il16, Ntf3
GO:0051216	BP	e	cartilage development	4/390	71/32695	0.0103	n.a.	4	1	1	1	Bmp5, Bmp7, Creb3l2, Smad1
GO:0045214	BP	e	sarcomere organization	3/390	38/32695	0.0104	n.a.	3	1	1	1	Mybpc3, Srf, Wdr1
GO:0035023	BP	e	regulation of Rho protein signal transduction	4/390	72/32695	0.0109	n.a.	4	1	1	1	Arhgef7, Farp1, Trio, Vav2
GO:0006351	BP	e	transcription, DNA-templated	34/390	1841/32695	0.0109	n.a.	34	1	1	1	Ablim2, Atmin, Bcor, Chd6, Creb3l2, Elf5, Eya2, Foxp4, Glis1, Hif3a, Hr, Il16, Irf9, Jdp2, Ncoa2, Nfatc2, Nfkb1, Pax5, Pbx1, Prdm16, Raly, Rfx8, Runx1, Rxra, Sall2, Scml4, Smad1, Srf, Tada1, Tead1, Vgll4, Wasl, Zfhx2, Zfp750
GO:0006869	BP	e	lipid transport	5/390	112/32695	0.0112	n.a.	5	1	1	1	Abca4, Abca7, Atp8a2, Osbp, Osbpl10
GO:0030336	BP	e	negative regulation of cell migration	5/390	112/32695	0.0112	n.a.	5	1	1	1	Dlg5, Kank1, Limch1, Magi2, Srf
GO:0060976	BP	e	coronary vasculature development	3/390	39/32695	0.0112	n.a.	3	1	1	1	Ltbp1, Pde2a, Sufu
GO:0048739	BP	e	cardiac muscle fiber development	2/390	14/32695	0.0117	n.a.	2	1	1	1	Mybpc3, Myo18b
GO:0071354	BP	e	cellular response to interleukin-6	2/390	14/32695	0.0117	n.a.	2	1	1	1	Ghrh, Nfkb1
GO:0060307	BP	e	regulation of ventricular cardiac muscle cell membrane repolarization	2/390	14/32695	0.0117	n.a.	2	1	1	1	Gja5, Wdr1
GO:0010467	BP	e	gene expression	2/390	14/32695	0.0117	n.a.	2	1	1	1	Fas, Fmn1
GO:0006165	BP	e	nucleoside diphosphate phosphorylation	2/390	14/32695	0.0117	n.a.	2	1	1	1	Ak5, Ak7
GO:0034775	BP	e	glutathione transmembrane transport	1/390	1/32695	0.0119	n.a.	1	1	1	1	Abcc1
GO:0050787	BP	e	detoxification of mercury ion	1/390	1/32695	0.0119	n.a.	1	1	1	1	Park7
GO:0071336	BP	e	regulation of hair follicle cell proliferation	1/390	1/32695	0.0119	n.a.	1	1	1	1	Runx1
GO:1903189	BP	e	glyoxal metabolic process	1/390	1/32695	0.0119	n.a.	1	1	1	1	Park7
GO:2001031	BP	e	positive regulation of cellular glucuronidation	1/390	1/32695	0.0119	n.a.	1	1	1	1	Prkce
GO:0046016	BP	e	positive regulation of transcription by glucose	1/390	1/32695	0.0119	n.a.	1	1	1	1	Srf
GO:1905701	BP	e	positive regulation of drug transmembrane export	1/390	1/32695	0.0119	n.a.	1	1	1	1	Abcc1
GO:0099039	BP	e	sphingolipid translocation	1/390	1/32695	0.0119	n.a.	1	1	1	1	Abcc1
GO:0042247	BP	e	establishment of planar polarity of follicular epithelium	1/390	1/32695	0.0119	n.a.	1	1	1	1	Wdr1
GO:0090461	BP	e	glutamate homeostasis	1/390	1/32695	0.0119	n.a.	1	1	1	1	Kctd7
GO:0086054	BP	e	bundle of His cell to Purkinje myocyte communication by electrical coupling	1/390	1/32695	0.0119	n.a.	1	1	1	1	Gja5
GO:1901076	BP	e	positive regulation of engulfment of apoptotic cell	1/390	1/32695	0.0119	n.a.	1	1	1	1	Abca7
GO:0045556	BP	e	positive regulation of TRAIL biosynthetic process	1/390	1/32695	0.0119	n.a.	1	1	1	1	Tnfrsf8
GO:0003174	BP	e	mitral valve development	1/390	1/32695	0.0119	n.a.	1	1	1	1	Gja5
GO:0106046	BP	e	guanine deglycation, glyoxal removal	1/390	1/32695	0.0119	n.a.	1	1	1	1	Park7
GO:0106045	BP	e	guanine deglycation, methylglyoxal removal	1/390	1/32695	0.0119	n.a.	1	1	1	1	Park7
GO:0106044	BP	e	guanine deglycation	1/390	1/32695	0.0119	n.a.	1	1	1	1	Park7
GO:1903906	BP	e	regulation of plasma membrane raft polarization	1/390	1/32695	0.0119	n.a.	1	1	1	1	Gsn
GO:1903903	BP	e	regulation of establishment of T cell polarity	1/390	1/32695	0.0119	n.a.	1	1	1	1	Gsn
GO:1903909	BP	e	regulation of receptor clustering	1/390	1/32695	0.0119	n.a.	1	1	1	1	Gsn
GO:0055130	BP	e	D-alanine catabolic process	1/390	1/32695	0.0119	n.a.	1	1	1	1	Dao
GO:0098906	BP	e	regulation of Purkinje myocyte action potential	1/390	1/32695	0.0119	n.a.	1	1	1	1	Gja5
GO:0003284	BP	e	septum primum development	1/390	1/32695	0.0119	n.a.	1	1	1	1	Gja5
GO:1903200	BP	e	positive regulation of L-dopa decarboxylase activity	1/390	1/32695	0.0119	n.a.	1	1	1	1	Park7
GO:0006768	BP	e	biotin metabolic process	1/390	1/32695	0.0119	n.a.	1	1	1	1	Btd
GO:0003071	BP	e	renal system process involved in regulation of systemic arterial blood pressure	1/390	1/32695	0.0119	n.a.	1	1	1	1	Gja5
GO:1903431	BP	e	positive regulation of cell maturation	1/390	1/32695	0.0119	n.a.	1	1	1	1	Runx1
GO:0046380	BP	e	N-acetylneuraminate biosynthetic process	1/390	1/32695	0.0119	n.a.	1	1	1	1	Nanp
GO:2000266	BP	e	regulation of blood coagulation, intrinsic pathway	1/390	1/32695	0.0119	n.a.	1	1	1	1	Serpinc1
GO:0090662	BP	e	ATP hydrolysis coupled transmembrane transport	1/390	1/32695	0.0119	n.a.	1	1	1	1	Atp1a1
GO:0046121	BP	e	deoxyribonucleoside catabolic process	1/390	1/32695	0.0119	n.a.	1	1	1	1	Dera
GO:0003011	BP	e	involuntary skeletal muscle contraction	1/390	1/32695	0.0119	n.a.	1	1	1	1	Atp8a2
GO:0036526	BP	e	peptidyl-cysteine deglycation	1/390	1/32695	0.0119	n.a.	1	1	1	1	Park7
GO:0036527	BP	e	peptidyl-arginine deglycation	1/390	1/32695	0.0119	n.a.	1	1	1	1	Park7
GO:0036528	BP	e	peptidyl-lysine deglycation	1/390	1/32695	0.0119	n.a.	1	1	1	1	Park7
GO:0036529	BP	e	protein deglycation, glyoxal removal	1/390	1/32695	0.0119	n.a.	1	1	1	1	Park7
GO:1904632	BP	e	cellular response to glucoside	1/390	1/32695	0.0119	n.a.	1	1	1	1	Nfkb1
GO:1904630	BP	e	cellular response to diterpene	1/390	1/32695	0.0119	n.a.	1	1	1	1	Nfkb1
GO:1900133	BP	e	regulation of renin secretion into blood stream	1/390	1/32695	0.0119	n.a.	1	1	1	1	Gja5
GO:1901879	BP	e	regulation of protein depolymerization	1/390	1/32695	0.0119	n.a.	1	1	1	1	Asph
GO:0018323	BP	e	enzyme active site formation via L-cysteine sulfinic acid	1/390	1/32695	0.0119	n.a.	1	1	1	1	Park7
GO:1904510	BP	e	positive regulation of protein localization to basolateral plasma membrane	1/390	1/32695	0.0119	n.a.	1	1	1	1	Cacng2
GO:0045989	BP	e	positive regulation of striated muscle contraction	1/390	1/32695	0.0119	n.a.	1	1	1	1	Atp1a1
GO:0045186	BP	e	zonula adherens assembly	1/390	1/32695	0.0119	n.a.	1	1	1	1	Dlg5
GO:0007185	BP	e	transmembrane receptor protein tyrosine phosphatase signaling pathway	1/390	1/32695	0.0119	n.a.	1	1	1	1	Ptpre
GO:0034959	BP	e	endothelin maturation	1/390	1/32695	0.0119	n.a.	1	1	1	1	Ece1
GO:0034729	BP	e	histone H3-K79 methylation	1/390	1/32695	0.0119	n.a.	1	1	1	1	Dot1l
GO:1903197	BP	e	positive regulation of L-dopa biosynthetic process	1/390	1/32695	0.0119	n.a.	1	1	1	1	Park7
GO:0098507	BP	e	polynucleotide 5' dephosphorylation	1/390	1/32695	0.0119	n.a.	1	1	1	1	Dusp11
GO:0086065	BP	e	cell communication involved in cardiac conduction	1/390	1/32695	0.0119	n.a.	1	1	1	1	Gja5
GO:0046295	BP	e	glycolate biosynthetic process	1/390	1/32695	0.0119	n.a.	1	1	1	1	Park7
GO:0000415	BP	e	negative regulation of histone H3-K36 methylation	1/390	1/32695	0.0119	n.a.	1	1	1	1	Bcor
GO:2000677	BP	e	regulation of transcription regulatory region DNA binding	1/390	1/32695	0.0119	n.a.	1	1	1	1	Dot1l
GO:0086044	BP	e	atrial cardiac muscle cell to AV node cell communication by electrical coupling	1/390	1/32695	0.0119	n.a.	1	1	1	1	Gja5
GO:0072040	BP	e	negative regulation of mesenchymal cell apoptotic process involved in nephron morphogenesis	1/390	1/32695	0.0119	n.a.	1	1	1	1	Bmp7
GO:0031947	BP	e	negative regulation of glucocorticoid biosynthetic process	1/390	1/32695	0.0119	n.a.	1	1	1	1	Atp1a1
GO:2000576	BP	e	positive regulation of microtubule motor activity	1/390	1/32695	0.0119	n.a.	1	1	1	1	Mtcl1
GO:0045083	BP	e	negative regulation of interleukin-12 biosynthetic process	1/390	1/32695	0.0119	n.a.	1	1	1	1	Nfkb1
GO:1903178	BP	e	positive regulation of tyrosine 3-monooxygenase activity	1/390	1/32695	0.0119	n.a.	1	1	1	1	Park7
GO:0010814	BP	e	substance P catabolic process	1/390	1/32695	0.0119	n.a.	1	1	1	1	Ece1
GO:0010816	BP	e	calcitonin catabolic process	1/390	1/32695	0.0119	n.a.	1	1	1	1	Ece1
GO:1990029	BP	e	vasomotion	1/390	1/32695	0.0119	n.a.	1	1	1	1	Gja5
GO:0035499	BP	e	carnosine biosynthetic process	1/390	1/32695	0.0119	n.a.	1	1	1	1	Carns1
GO:0097017	BP	e	renal protein absorption	1/390	1/32695	0.0119	n.a.	1	1	1	1	Gsn
GO:0070350	BP	e	regulation of white fat cell proliferation	1/390	1/32695	0.0119	n.a.	1	1	1	1	Fto
GO:0036088	BP	e	D-serine catabolic process	1/390	1/32695	0.0119	n.a.	1	1	1	1	Dao
GO:2001306	BP	e	lipoxin B4 biosynthetic process	1/390	1/32695	0.0119	n.a.	1	1	1	1	Alox12
GO:0032274	BP	e	gonadotropin secretion	1/390	1/32695	0.0119	n.a.	1	1	1	1	Fam129b
GO:1903122	BP	e	negative regulation of TRAIL-activated apoptotic signaling pathway	1/390	1/32695	0.0119	n.a.	1	1	1	1	Park7
GO:0036531	BP	e	glutathione deglycation	1/390	1/32695	0.0119	n.a.	1	1	1	1	Park7
GO:1990953	BP	e	intramanchette transport	1/390	1/32695	0.0119	n.a.	1	1	1	1	Cep131
GO:1903168	BP	e	positive regulation of pyrroline-5-carboxylate reductase activity	1/390	1/32695	0.0119	n.a.	1	1	1	1	Park7
GO:0030038	BP	e	contractile actin filament bundle assembly	1/390	1/32695	0.0119	n.a.	1	1	1	1	Srf
GO:0044128	BP	e	positive regulation of growth of symbiont in host	1/390	1/32695	0.0119	n.a.	1	1	1	1	Osbp
GO:0036471	BP	e	cellular response to glyoxal	1/390	1/32695	0.0119	n.a.	1	1	1	1	Park7
GO:0060395	BP	e	SMAD protein signal transduction	4/390	75/32695	0.0125	n.a.	4	1	1	1	Bmp5, Bmp7, Magi2, Smad1
GO:0042127	BP	e	regulation of cell proliferation	7/390	207/32695	0.0125	n.a.	7	1	1	1	Bricd5, Fanca, Fas, Lama5, Lgr5, Pbx1, Tead1
GO:0006612	BP	e	protein targeting to membrane	3/390	41/32695	0.0128	n.a.	3	1	1	1	Cacng2, Zdhhc14, Zdhhc18
GO:0001934	BP	e	positive regulation of protein phosphorylation	7/390	210/32695	0.0134	n.a.	7	1	1	1	Fas, Fndc1, Insr, Limch1, Musk, Peli2, Pik3r1
GO:0006518	BP	e	peptide metabolic process	2/390	15/32695	0.0134	n.a.	2	1	1	1	Cpn1, Mipep
GO:0016050	BP	e	vesicle organization	2/390	15/32695	0.0134	n.a.	2	1	1	1	Snx11, Wasl
GO:0043583	BP	e	ear development	2/390	15/32695	0.0134	n.a.	2	1	1	1	Bmp5, Ece1
GO:0060411	BP	e	cardiac septum morphogenesis	2/390	15/32695	0.0134	n.a.	2	1	1	1	Bmp5, Bmp7
GO:0040011	BP	e	locomotion	2/390	15/32695	0.0134	n.a.	2	1	1	1	Ntf3, Wdr1
GO:0030007	BP	e	cellular potassium ion homeostasis	2/390	15/32695	0.0134	n.a.	2	1	1	1	Atp1a1, Kctd7
GO:0060445	BP	e	branching involved in salivary gland morphogenesis	2/390	15/32695	0.0134	n.a.	2	1	1	1	Bmp7, Lama5
GO:0090303	BP	e	positive regulation of wound healing	2/390	15/32695	0.0134	n.a.	2	1	1	1	Kank1, Prkce
GO:0007266	BP	e	Rho protein signal transduction	4/390	77/32695	0.0136	n.a.	4	1	1	1	Cdc42ep4, Cdh13, Pak4, Pecam1
GO:0000226	BP	e	microtubule cytoskeleton organization	5/390	121/32695	0.0152	n.a.	5	1	1	1	Cul9, Eml1, Mark1, Sik3, Tbce
GO:2000679	BP	e	positive regulation of transcription regulatory region DNA binding	2/390	16/32695	0.0152	n.a.	2	1	1	1	Fam129b, Park7
GO:0007009	BP	e	plasma membrane organization	2/390	16/32695	0.0152	n.a.	2	1	1	1	Mtss1, Sptb
GO:0050732	BP	e	negative regulation of peptidyl-tyrosine phosphorylation	2/390	17/32695	0.0171	n.a.	2	1	1	1	Ntf3, Pecam1
GO:0042325	BP	e	regulation of phosphorylation	2/390	17/32695	0.0171	n.a.	2	1	1	1	Bmp7, Ppp1r14a
GO:0051016	BP	e	barbed-end actin filament capping	2/390	17/32695	0.0171	n.a.	2	1	1	1	Capzb, Gsn
GO:0061351	BP	e	neural precursor cell proliferation	2/390	17/32695	0.0171	n.a.	2	1	1	1	Ephb1, Grn
GO:0060038	BP	e	cardiac muscle cell proliferation	2/390	17/32695	0.0171	n.a.	2	1	1	1	Rxra, Smad1
GO:0001678	BP	e	cellular glucose homeostasis	2/390	18/32695	0.0191	n.a.	2	1	1	1	Hk1, Pik3r1
GO:1900006	BP	e	positive regulation of dendrite development	2/390	18/32695	0.0191	n.a.	2	1	1	1	Bmp5, Bmp7
GO:0030220	BP	e	platelet formation	2/390	18/32695	0.0191	n.a.	2	1	1	1	Srf, Wdr1
GO:0060996	BP	e	dendritic spine development	2/390	18/32695	0.0191	n.a.	2	1	1	1	Ephb1, Pak4
GO:0007346	BP	e	regulation of mitotic cell cycle	4/390	87/32695	0.0204	n.a.	4	1	1	1	Afap1l2, Map3k14, Pak4, Taok3
GO:0030838	BP	e	positive regulation of actin filament polymerization	3/390	49/32695	0.0207	n.a.	3	1	1	1	Cdc42ep4, Fmn1, Prkce
GO:0055003	BP	e	cardiac myofibril assembly	2/390	19/32695	0.0212	n.a.	2	1	1	1	Mybpc3, Srf
GO:0007405	BP	e	neuroblast proliferation	2/390	19/32695	0.0212	n.a.	2	1	1	1	Dagla, Eml1
GO:0010666	BP	e	positive regulation of cardiac muscle cell apoptotic process	2/390	19/32695	0.0212	n.a.	2	1	1	1	Camk2a, Fndc1
GO:0045597	BP	e	positive regulation of cell differentiation	3/390	50/32695	0.0218	n.a.	3	1	1	1	Bmp7, Smad1, Srf
GO:0023014	BP	e	signal transduction by protein phosphorylation	3/390	50/32695	0.0218	n.a.	3	1	1	1	Map3k14, Pak4, Taok3
GO:0046777	BP	e	protein autophosphorylation	6/390	182/32695	0.0224	n.a.	6	1	1	1	Camk2a, Ephb1, Hk1, Insr, Musk, Taok3
GO:0007411	BP	e	axon guidance	5/390	134/32695	0.0225	n.a.	5	1	1	1	Bmp7, Boc, Ephb1, Ntf3, Slit3
GO:0060548	BP	e	negative regulation of cell death	4/390	90/32695	0.0228	n.a.	4	1	1	1	Abcc1, Bmp7, Park7, Pde2a
GO:0001942	BP	e	hair follicle development	3/390	51/32695	0.023	n.a.	3	1	1	1	Lama5, Lgr5, Wnt10a
GO:0060997	BP	e	dendritic spine morphogenesis	2/390	20/32695	0.0234	n.a.	2	1	1	1	Ephb1, Wasl
GO:0046328	BP	e	regulation of JNK cascade	2/390	20/32695	0.0234	n.a.	2	1	1	1	Ephb1, Mapk8ip1
GO:0051056	BP	e	regulation of small GTPase mediated signal transduction	2/390	20/32695	0.0234	n.a.	2	1	1	1	Arhgap26, Rap1gap2
GO:0032148	BP	e	activation of protein kinase B activity	2/390	20/32695	0.0234	n.a.	2	1	1	1	Insr, Ntf3
GO:0030488	BP	e	tRNA methylation	2/390	20/32695	0.0234	n.a.	2	1	1	1	Ftsj1, Trmo
GO:0045197	BP	e	establishment or maintenance of epithelial cell apical/basal polarity	2/390	20/32695	0.0234	n.a.	2	1	1	1	Dlg5, Mtcl1
GO:0030859	BP	e	polarized epithelial cell differentiation	1/390	2/32695	0.0237	n.a.	1	1	1	1	Dlg5
GO:0031104	BP	e	dendrite regeneration	1/390	2/32695	0.0237	n.a.	1	1	1	1	Fas
GO:0006649	BP	e	phospholipid transfer to membrane	1/390	2/32695	0.0237	n.a.	1	1	1	1	Abca4
GO:0003193	BP	e	pulmonary valve formation	1/390	2/32695	0.0237	n.a.	1	1	1	1	Gja5
GO:2000872	BP	e	positive regulation of progesterone secretion	1/390	2/32695	0.0237	n.a.	1	1	1	1	Runx1
GO:0070178	BP	e	D-serine metabolic process	1/390	2/32695	0.0237	n.a.	1	1	1	1	Dao
GO:0070171	BP	e	negative regulation of tooth mineralization	1/390	2/32695	0.0237	n.a.	1	1	1	1	Bcor
GO:0042245	BP	e	RNA repair	1/390	2/32695	0.0237	n.a.	1	1	1	1	Fto
GO:1903923	BP	e	positive regulation of protein processing in phagocytic vesicle	1/390	2/32695	0.0237	n.a.	1	1	1	1	Gsn
GO:0042264	BP	e	peptidyl-aspartic acid hydroxylation	1/390	2/32695	0.0237	n.a.	1	1	1	1	Asph
GO:1901249	BP	e	regulation of lung goblet cell differentiation	1/390	2/32695	0.0237	n.a.	1	1	1	1	Foxp4
GO:1902995	BP	e	positive regulation of phospholipid efflux	1/390	2/32695	0.0237	n.a.	1	1	1	1	Abca7
GO:2000541	BP	e	positive regulation of protein geranylgeranylation	1/390	2/32695	0.0237	n.a.	1	1	1	1	Musk
GO:0072134	BP	e	nephrogenic mesenchyme morphogenesis	1/390	2/32695	0.0237	n.a.	1	1	1	1	Bmp7
GO:2000393	BP	e	negative regulation of lamellipodium morphogenesis	1/390	2/32695	0.0237	n.a.	1	1	1	1	Kank1
GO:0098905	BP	e	regulation of bundle of His cell action potential	1/390	2/32695	0.0237	n.a.	1	1	1	1	Gja5
GO:1904209	BP	e	positive regulation of chemokine (C-C motif) ligand 2 secretion	1/390	2/32695	0.0237	n.a.	1	1	1	1	Mbp
GO:0006551	BP	e	leucine metabolic process	1/390	2/32695	0.0237	n.a.	1	1	1	1	Dao
GO:0031585	BP	e	regulation of inositol 1,4,5-trisphosphate-sensitive calcium-release channel activity	1/390	2/32695	0.0237	n.a.	1	1	1	1	Asph
GO:0070682	BP	e	proteasome regulatory particle assembly	1/390	2/32695	0.0237	n.a.	1	1	1	1	Psmd9
GO:0098921	BP	e	retrograde trans-synaptic signaling by endocannabinoid	1/390	2/32695	0.0237	n.a.	1	1	1	1	Dagla
GO:0002866	BP	e	positive regulation of acute inflammatory response to antigenic stimulus	1/390	2/32695	0.0237	n.a.	1	1	1	1	Park7
GO:1903416	BP	e	response to glycoside	1/390	2/32695	0.0237	n.a.	1	1	1	1	Atp1a1
GO:0071926	BP	e	endocannabinoid signaling pathway	1/390	2/32695	0.0237	n.a.	1	1	1	1	Dagla
GO:1904424	BP	e	regulation of GTP binding	1/390	2/32695	0.0237	n.a.	1	1	1	1	Arhgef7
GO:0019249	BP	e	lactate biosynthetic process	1/390	2/32695	0.0237	n.a.	1	1	1	1	Park7
GO:0031034	BP	e	myosin filament assembly	1/390	2/32695	0.0237	n.a.	1	1	1	1	Mybpc3
GO:0009590	BP	e	detection of gravity	1/390	2/32695	0.0237	n.a.	1	1	1	1	Nox3
GO:0010652	BP	e	positive regulation of cell communication by chemical coupling	1/390	2/32695	0.0237	n.a.	1	1	1	1	Gja5
GO:0065001	BP	e	specification of axis polarity	1/390	2/32695	0.0237	n.a.	1	1	1	1	Bcor
GO:2000194	BP	e	regulation of female gonad development	1/390	2/32695	0.0237	n.a.	1	1	1	1	Insr
GO:1904613	BP	e	cellular response to 2,3,7,8-tetrachlorodibenzodioxine	1/390	2/32695	0.0237	n.a.	1	1	1	1	Pde2a
GO:0036337	BP	e	Fas signaling pathway	1/390	2/32695	0.0237	n.a.	1	1	1	1	Fas
GO:0015918	BP	e	sterol transport	1/390	2/32695	0.0237	n.a.	1	1	1	1	Osbp
GO:0015911	BP	e	plasma membrane long-chain fatty acid transport	1/390	2/32695	0.0237	n.a.	1	1	1	1	Abcc1
GO:0035332	BP	e	positive regulation of hippo signaling	1/390	2/32695	0.0237	n.a.	1	1	1	1	Dlg5
GO:0042494	BP	e	detection of bacterial lipoprotein	1/390	2/32695	0.0237	n.a.	1	1	1	1	Ssc5d
GO:1902723	BP	e	negative regulation of skeletal muscle satellite cell proliferation	1/390	2/32695	0.0237	n.a.	1	1	1	1	Ephb1
GO:1902725	BP	e	negative regulation of satellite cell differentiation	1/390	2/32695	0.0237	n.a.	1	1	1	1	Ephb1
GO:0009629	BP	e	response to gravity	1/390	2/32695	0.0237	n.a.	1	1	1	1	Nox3
GO:0035922	BP	e	foramen ovale closure	1/390	2/32695	0.0237	n.a.	1	1	1	1	Gja5
GO:0072160	BP	e	nephron tubule epithelial cell differentiation	1/390	2/32695	0.0237	n.a.	1	1	1	1	Mtss1
GO:0051583	BP	e	dopamine uptake involved in synaptic transmission	1/390	2/32695	0.0237	n.a.	1	1	1	1	Park7
GO:2000157	BP	e	negative regulation of ubiquitin-specific protease activity	1/390	2/32695	0.0237	n.a.	1	1	1	1	Park7
GO:0023035	BP	e	CD40 signaling pathway	1/390	2/32695	0.0237	n.a.	1	1	1	1	Rnf31
GO:0060532	BP	e	bronchus cartilage development	1/390	2/32695	0.0237	n.a.	1	1	1	1	Srf
GO:0051654	BP	e	establishment of mitochondrion localization	1/390	2/32695	0.0237	n.a.	1	1	1	1	Mark1
GO:0051656	BP	e	establishment of organelle localization	1/390	2/32695	0.0237	n.a.	1	1	1	1	Crocc
GO:1905259	BP	e	negative regulation of nitrosative stress-induced intrinsic apoptotic signaling pathway	1/390	2/32695	0.0237	n.a.	1	1	1	1	Park7
GO:0046416	BP	e	D-amino acid metabolic process	1/390	2/32695	0.0237	n.a.	1	1	1	1	Dao
GO:1903506	BP	e	regulation of nucleic acid-templated transcription	1/390	2/32695	0.0237	n.a.	1	1	1	1	Raly
GO:0086064	BP	e	cell communication by electrical coupling involved in cardiac conduction	1/390	2/32695	0.0237	n.a.	1	1	1	1	Gja5
GO:0014891	BP	e	striated muscle atrophy	1/390	2/32695	0.0237	n.a.	1	1	1	1	Gsn
GO:0061140	BP	e	lung secretory cell differentiation	1/390	2/32695	0.0237	n.a.	1	1	1	1	Foxp4
GO:0061145	BP	e	lung smooth muscle development	1/390	2/32695	0.0237	n.a.	1	1	1	1	Srf
GO:0006677	BP	e	glycosylceramide metabolic process	1/390	2/32695	0.0237	n.a.	1	1	1	1	St6galnac6
GO:0035669	BP	e	TRAM-dependent toll-like receptor 4 signaling pathway	1/390	2/32695	0.0237	n.a.	1	1	1	1	Prkce
GO:0099004	BP	e	calmodulin dependent kinase signaling pathway	1/390	2/32695	0.0237	n.a.	1	1	1	1	Camk2a
GO:1901250	BP	e	negative regulation of lung goblet cell differentiation	1/390	2/32695	0.0237	n.a.	1	1	1	1	Foxp4
GO:0003294	BP	e	atrial ventricular junction remodeling	1/390	2/32695	0.0237	n.a.	1	1	1	1	Gja5
GO:0045887	BP	e	positive regulation of synaptic growth at neuromuscular junction	1/390	2/32695	0.0237	n.a.	1	1	1	1	Musk
GO:1904685	BP	e	positive regulation of metalloendopeptidase activity	1/390	2/32695	0.0237	n.a.	1	1	1	1	Mbp
GO:0035552	BP	e	oxidative single-stranded DNA demethylation	1/390	2/32695	0.0237	n.a.	1	1	1	1	Fto
GO:1903094	BP	e	negative regulation of protein K48-linked deubiquitination	1/390	2/32695	0.0237	n.a.	1	1	1	1	Park7
GO:0070086	BP	e	ubiquitin-dependent endocytosis	1/390	2/32695	0.0237	n.a.	1	1	1	1	Neurl1b
GO:0048840	BP	e	otolith development	1/390	2/32695	0.0237	n.a.	1	1	1	1	Nox3
GO:2000277	BP	e	positive regulation of oxidative phosphorylation uncoupler activity	1/390	2/32695	0.0237	n.a.	1	1	1	1	Park7
GO:0090673	BP	e	endothelial cell-matrix adhesion	1/390	2/32695	0.0237	n.a.	1	1	1	1	Pecam1
GO:2001303	BP	e	lipoxin A4 biosynthetic process	1/390	2/32695	0.0237	n.a.	1	1	1	1	Alox12
GO:1903384	BP	e	negative regulation of hydrogen peroxide-induced neuron intrinsic apoptotic signaling pathway	1/390	2/32695	0.0237	n.a.	1	1	1	1	Park7
GO:0072136	BP	e	metanephric mesenchymal cell proliferation involved in metanephros development	1/390	2/32695	0.0237	n.a.	1	1	1	1	Bmp7
GO:0042748	BP	e	circadian sleep/wake cycle, non-REM sleep	1/390	2/32695	0.0237	n.a.	1	1	1	1	Ghrh
GO:0070230	BP	e	positive regulation of lymphocyte apoptotic process	1/390	2/32695	0.0237	n.a.	1	1	1	1	Fas
GO:0046373	BP	e	L-arabinose metabolic process	1/390	2/32695	0.0237	n.a.	1	1	1	1	Otog
GO:1904782	BP	e	negative regulation of NMDA glutamate receptor activity	1/390	2/32695	0.0237	n.a.	1	1	1	1	Park7
GO:1902958	BP	e	positive regulation of mitochondrial electron transport, NADH to ubiquinone	1/390	2/32695	0.0237	n.a.	1	1	1	1	Park7
GO:0045994	BP	e	positive regulation of translational initiation by iron	1/390	2/32695	0.0237	n.a.	1	1	1	1	Rxra
GO:0034765	BP	e	regulation of ion transmembrane transport	5/390	136/32695	0.0238	n.a.	5	1	1	1	Cacna1c, Cacng2, Cacng5, Clic6, Nedd4l
GO:0008544	BP	e	epidermis development	3/390	52/32695	0.0242	n.a.	3	1	1	1	Insr, Ntf3, Zfp750
GO:0006909	BP	e	phagocytosis	3/390	52/32695	0.0242	n.a.	3	1	1	1	Abca7, Elmo1, Pecam1
GO:0043588	BP	e	skin development	3/390	53/32695	0.0254	n.a.	3	1	1	1	Atp8a2, Sufu, Wnt10a
GO:0071407	BP	e	cellular response to organic cyclic compound	3/390	53/32695	0.0254	n.a.	3	1	1	1	Nfkb1, Pak4, Smad1
GO:0035162	BP	e	embryonic hemopoiesis	2/390	21/32695	0.0257	n.a.	2	1	1	1	Pbx1, Runx1
GO:0016601	BP	e	Rac protein signal transduction	2/390	21/32695	0.0257	n.a.	2	1	1	1	Cdh13, Elmo1
GO:0030837	BP	e	negative regulation of actin filament polymerization	2/390	21/32695	0.0257	n.a.	2	1	1	1	Kank1, Pecam1
GO:0051899	BP	e	membrane depolarization	2/390	21/32695	0.0257	n.a.	2	1	1	1	Cacng2, Park7
GO:0019226	BP	e	transmission of nerve impulse	2/390	21/32695	0.0257	n.a.	2	1	1	1	Cacng2, Cacng5
GO:0007584	BP	e	response to nutrient	2/390	21/32695	0.0257	n.a.	2	1	1	1	Agl, Serpinc1
GO:0042476	BP	e	odontogenesis	2/390	21/32695	0.0257	n.a.	2	1	1	1	Bcor, Wnt10a
GO:1903076	BP	e	regulation of protein localization to plasma membrane	2/390	21/32695	0.0257	n.a.	2	1	1	1	Camk2a, Pik3r1
GO:0007399	BP	e	nervous system development	10/390	381/32695	0.027	n.a.	10	1	1	1	Arhgef7, D130043K22Rik, Dscam, Dscaml1, Ephb1, Magi2, Mtss1, Ntf3, Pax5, Slit3
GO:0043410	BP	e	positive regulation of MAPK cascade	5/390	141/32695	0.0273	n.a.	5	1	1	1	Ephb1, Insr, Lpar3, Peli2, Prkce
GO:0030325	BP	e	adrenal gland development	2/390	22/32695	0.028	n.a.	2	1	1	1	Insr, Pbx1
GO:0018230	BP	e	peptidyl-L-cysteine S-palmitoylation	2/390	22/32695	0.028	n.a.	2	1	1	1	Zdhhc14, Zdhhc18
GO:0090316	BP	e	positive regulation of intracellular protein transport	2/390	22/32695	0.028	n.a.	2	1	1	1	Asph, Cep131
GO:0018345	BP	e	protein palmitoylation	2/390	22/32695	0.028	n.a.	2	1	1	1	Zdhhc14, Zdhhc18
GO:0030031	BP	e	cell projection assembly	2/390	22/32695	0.028	n.a.	2	1	1	1	Vav2, Wasl
GO:0043066	BP	e	negative regulation of apoptotic process	13/390	568/32695	0.0281	n.a.	13	1	1	1	Alox12, Ephb1, Fam129b, Fas, Hk1, Insr, Lims2, Mapk8ip1, Musk, Nfkb1, Park7, Pik3r1, Prkce
GO:0008217	BP	e	regulation of blood pressure	3/390	56/32695	0.0293	n.a.	3	1	1	1	Atp1a1, Cacna1c, Ece1
GO:2000311	BP	e	regulation of AMPA receptor activity	2/390	23/32695	0.0304	n.a.	2	1	1	1	Cacng2, Cacng5
GO:0030041	BP	e	actin filament polymerization	2/390	23/32695	0.0304	n.a.	2	1	1	1	Gsn, Mtss1
GO:0001659	BP	e	temperature homeostasis	2/390	23/32695	0.0304	n.a.	2	1	1	1	Fto, Nox3
GO:0046329	BP	e	negative regulation of JNK cascade	2/390	23/32695	0.0304	n.a.	2	1	1	1	Mapk8ip1, Taok3
GO:0008361	BP	e	regulation of cell size	2/390	23/32695	0.0304	n.a.	2	1	1	1	Rap1gap2, Xk
GO:0006874	BP	e	cellular calcium ion homeostasis	4/390	99/32695	0.031	n.a.	4	1	1	1	Anxa7, Cacna1c, Slc24a3, Xk
GO:0008360	BP	e	regulation of cell shape	5/390	147/32695	0.0319	n.a.	5	1	1	1	Anxa7, Cdc42ep4, Syne3, Wasl, Wdr1
GO:0010942	BP	e	positive regulation of cell death	3/390	58/32695	0.0321	n.a.	3	1	1	1	Alox12, Bmp7, Fas
GO:0048593	BP	e	camera-type eye morphogenesis	2/390	24/32695	0.033	n.a.	2	1	1	1	Bmp7, Ephb1
GO:0002337	BP	e	B-1a B cell differentiation	1/390	3/32695	0.0354	n.a.	1	1	1	1	Cmtm7
GO:1903181	BP	e	positive regulation of dopamine biosynthetic process	1/390	3/32695	0.0354	n.a.	1	1	1	1	Park7
GO:0071801	BP	e	regulation of podosome assembly	1/390	3/32695	0.0354	n.a.	1	1	1	1	Gsn
GO:0014889	BP	e	muscle atrophy	1/390	3/32695	0.0354	n.a.	1	1	1	1	Tbce
GO:0086053	BP	e	AV node cell to bundle of His cell communication by electrical coupling	1/390	3/32695	0.0354	n.a.	1	1	1	1	Gja5
GO:0016052	BP	e	carbohydrate catabolic process	1/390	3/32695	0.0354	n.a.	1	1	1	1	Dera
GO:0009988	BP	e	cell-cell recognition	1/390	3/32695	0.0354	n.a.	1	1	1	1	St6galnac6
GO:1904017	BP	e	cellular response to Thyroglobulin triiodothyronine	1/390	3/32695	0.0354	n.a.	1	1	1	1	Ncoa2
GO:1902174	BP	e	positive regulation of keratinocyte apoptotic process	1/390	3/32695	0.0354	n.a.	1	1	1	1	Gsn
GO:0002667	BP	e	regulation of T cell anergy	1/390	3/32695	0.0354	n.a.	1	1	1	1	Runx1
GO:1905312	BP	e	positive regulation of cardiac neural crest cell migration involved in outflow tract morphogenesis	1/390	3/32695	0.0354	n.a.	1	1	1	1	Bmp7
GO:0099526	BP	e	presynapse to nucleus signaling pathway	1/390	3/32695	0.0354	n.a.	1	1	1	1	Bsn
GO:0060060	BP	e	post-embryonic retina morphogenesis in camera-type eye	1/390	3/32695	0.0354	n.a.	1	1	1	1	Dscam
GO:0009264	BP	e	deoxyribonucleotide catabolic process	1/390	3/32695	0.0354	n.a.	1	1	1	1	Dera
GO:2000482	BP	e	regulation of interleukin-8 secretion	1/390	3/32695	0.0354	n.a.	1	1	1	1	Ssc5d
GO:0051446	BP	e	positive regulation of meiotic cell cycle	1/390	3/32695	0.0354	n.a.	1	1	1	1	Insr
GO:0043371	BP	e	negative regulation of CD4-positive, alpha-beta T cell differentiation	1/390	3/32695	0.0354	n.a.	1	1	1	1	Runx1
GO:0097049	BP	e	motor neuron apoptotic process	1/390	3/32695	0.0354	n.a.	1	1	1	1	Fas
GO:0042908	BP	e	xenobiotic transport	1/390	3/32695	0.0354	n.a.	1	1	1	1	Abcc1
GO:0001788	BP	e	antibody-dependent cellular cytotoxicity	1/390	3/32695	0.0354	n.a.	1	1	1	1	Fcgr1
GO:0072125	BP	e	negative regulation of glomerular mesangial cell proliferation	1/390	3/32695	0.0354	n.a.	1	1	1	1	Bmp7
GO:0048871	BP	e	multicellular organismal homeostasis	1/390	3/32695	0.0354	n.a.	1	1	1	1	Tns2
GO:0055096	BP	e	low-density lipoprotein particle mediated signaling	1/390	3/32695	0.0354	n.a.	1	1	1	1	Cdh13
GO:0033003	BP	e	regulation of mast cell activation	1/390	3/32695	0.0354	n.a.	1	1	1	1	Ptpre
GO:0048936	BP	e	peripheral nervous system neuron axonogenesis	1/390	3/32695	0.0354	n.a.	1	1	1	1	Tbce
GO:0070487	BP	e	monocyte aggregation	1/390	3/32695	0.0354	n.a.	1	1	1	1	Bmp7
GO:0048210	BP	e	Golgi vesicle fusion to target membrane	1/390	3/32695	0.0354	n.a.	1	1	1	1	Rab8b
GO:1903566	BP	e	positive regulation of protein localization to cilium	1/390	3/32695	0.0354	n.a.	1	1	1	1	Crocc
GO:0010956	BP	e	negative regulation of calcidiol 1-monooxygenase activity	1/390	3/32695	0.0354	n.a.	1	1	1	1	Nfkb1
GO:0021775	BP	e	smoothened signaling pathway involved in ventral spinal cord interneuron specification	1/390	3/32695	0.0354	n.a.	1	1	1	1	Sufu
GO:0021776	BP	e	smoothened signaling pathway involved in spinal cord motor neuron cell fate specification	1/390	3/32695	0.0354	n.a.	1	1	1	1	Sufu
GO:0061621	BP	e	canonical glycolysis	1/390	3/32695	0.0354	n.a.	1	1	1	1	Hk1
GO:2000825	BP	e	positive regulation of androgen receptor activity	1/390	3/32695	0.0354	n.a.	1	1	1	1	Park7
GO:1903377	BP	e	negative regulation of oxidative stress-induced neuron intrinsic apoptotic signaling pathway	1/390	3/32695	0.0354	n.a.	1	1	1	1	Park7
GO:0006114	BP	e	glycerol biosynthetic process	1/390	3/32695	0.0354	n.a.	1	1	1	1	Pgp
GO:0007403	BP	e	glial cell fate determination	1/390	3/32695	0.0354	n.a.	1	1	1	1	Ntf3
GO:0061092	BP	e	positive regulation of phospholipid translocation	1/390	3/32695	0.0354	n.a.	1	1	1	1	Atp8a2
GO:0019884	BP	e	antigen processing and presentation of exogenous antigen	1/390	3/32695	0.0354	n.a.	1	1	1	1	Fcgr1
GO:0086067	BP	e	AV node cell to bundle of His cell communication	1/390	3/32695	0.0354	n.a.	1	1	1	1	Gja5
GO:0006925	BP	e	inflammatory cell apoptotic process	1/390	3/32695	0.0354	n.a.	1	1	1	1	Fas
GO:0090063	BP	e	positive regulation of microtubule nucleation	1/390	3/32695	0.0354	n.a.	1	1	1	1	Pde4dip
GO:0033159	BP	e	negative regulation of protein import into nucleus, translocation	1/390	3/32695	0.0354	n.a.	1	1	1	1	Pde2a
GO:0014719	BP	e	skeletal muscle satellite cell activation	1/390	3/32695	0.0354	n.a.	1	1	1	1	Ephb1
GO:0018193	BP	e	peptidyl-amino acid modification	1/390	3/32695	0.0354	n.a.	1	1	1	1	Asph
GO:1901984	BP	e	negative regulation of protein acetylation	1/390	3/32695	0.0354	n.a.	1	1	1	1	Park7
GO:1905516	BP	e	positive regulation of fertilization	1/390	3/32695	0.0354	n.a.	1	1	1	1	Park7
GO:0034334	BP	e	adherens junction maintenance	1/390	3/32695	0.0354	n.a.	1	1	1	1	Mtss1
GO:0034628	BP	e	'de novo' NAD biosynthetic process from aspartate	1/390	3/32695	0.0354	n.a.	1	1	1	1	Nmnat2
GO:1902306	BP	e	negative regulation of sodium ion transmembrane transport	1/390	3/32695	0.0354	n.a.	1	1	1	1	Nedd4l
GO:0098910	BP	e	regulation of atrial cardiac muscle cell action potential	1/390	3/32695	0.0354	n.a.	1	1	1	1	Gja5
GO:0098912	BP	e	membrane depolarization during atrial cardiac muscle cell action potential	1/390	3/32695	0.0354	n.a.	1	1	1	1	Cacna1c
GO:0044065	BP	e	regulation of respiratory system process	1/390	3/32695	0.0354	n.a.	1	1	1	1	Fto
GO:0035553	BP	e	oxidative single-stranded RNA demethylation	1/390	3/32695	0.0354	n.a.	1	1	1	1	Fto
GO:0006562	BP	e	proline catabolic process	1/390	3/32695	0.0354	n.a.	1	1	1	1	Dao
GO:0019724	BP	e	B cell mediated immunity	1/390	3/32695	0.0354	n.a.	1	1	1	1	Fas
GO:1900222	BP	e	negative regulation of amyloid-beta clearance	1/390	3/32695	0.0354	n.a.	1	1	1	1	Srf
GO:0097039	BP	e	protein linear polyubiquitination	1/390	3/32695	0.0354	n.a.	1	1	1	1	Rnf31
GO:0035513	BP	e	oxidative RNA demethylation	1/390	3/32695	0.0354	n.a.	1	1	1	1	Fto
GO:0043988	BP	e	histone H3-S28 phosphorylation	1/390	3/32695	0.0354	n.a.	1	1	1	1	Rps6ka4
GO:1903445	BP	e	protein transport from ciliary membrane to plasma membrane	1/390	3/32695	0.0354	n.a.	1	1	1	1	Rilpl2
GO:1901653	BP	e	cellular response to peptide	1/390	3/32695	0.0354	n.a.	1	1	1	1	Nfkb1
GO:0072133	BP	e	metanephric mesenchyme morphogenesis	1/390	3/32695	0.0354	n.a.	1	1	1	1	Bmp7
GO:0010643	BP	e	cell communication by chemical coupling	1/390	3/32695	0.0354	n.a.	1	1	1	1	Gja5
GO:0072092	BP	e	ureteric bud invasion	1/390	3/32695	0.0354	n.a.	1	1	1	1	Fmn1
GO:0045218	BP	e	zonula adherens maintenance	1/390	3/32695	0.0354	n.a.	1	1	1	1	Plekha7
GO:1901671	BP	e	positive regulation of superoxide dismutase activity	1/390	3/32695	0.0354	n.a.	1	1	1	1	Park7
GO:1900106	BP	e	positive regulation of hyaluranon cable assembly	1/390	3/32695	0.0354	n.a.	1	1	1	1	Bmp7
GO:0006435	BP	e	threonyl-tRNA aminoacylation	1/390	3/32695	0.0354	n.a.	1	1	1	1	Tars
GO:1905198	BP	e	manchette assembly	1/390	3/32695	0.0354	n.a.	1	1	1	1	Cep131
GO:0061577	BP	e	calcium ion transmembrane transport via high voltage-gated calcium channel	1/390	3/32695	0.0354	n.a.	1	1	1	1	Cacna1c
GO:2001288	BP	e	positive regulation of caveolin-mediated endocytosis	1/390	3/32695	0.0354	n.a.	1	1	1	1	Nedd4l
GO:0042447	BP	e	hormone catabolic process	1/390	3/32695	0.0354	n.a.	1	1	1	1	Ece1
GO:0097118	BP	e	neuroligin clustering involved in postsynaptic membrane assembly	1/390	3/32695	0.0354	n.a.	1	1	1	1	Magi2
GO:0001710	BP	e	mesodermal cell fate commitment	1/390	3/32695	0.0354	n.a.	1	1	1	1	Smad1
GO:0001712	BP	e	ectodermal cell fate commitment	1/390	3/32695	0.0354	n.a.	1	1	1	1	Elf5
GO:0030326	BP	e	embryonic limb morphogenesis	3/390	62/32695	0.038	n.a.	3	1	1	1	Bmp7, Gja5, Pbx1
GO:0022008	BP	e	neurogenesis	3/390	62/32695	0.038	n.a.	3	1	1	1	Dagla, Ephb1, Prdm16
GO:0048738	BP	e	cardiac muscle tissue development	2/390	26/32695	0.0382	n.a.	2	1	1	1	Bmp5, Bmp7
GO:0032757	BP	e	positive regulation of interleukin-8 production	2/390	26/32695	0.0382	n.a.	2	1	1	1	Afap1l2, Park7
GO:0043542	BP	e	endothelial cell migration	2/390	26/32695	0.0382	n.a.	2	1	1	1	Cdh13, Pecam1
GO:0008625	BP	e	extrinsic apoptotic signaling pathway via death domain receptors	2/390	26/32695	0.0382	n.a.	2	1	1	1	Fas, Pik3r1
GO:0048741	BP	e	skeletal muscle fiber development	2/390	26/32695	0.0382	n.a.	2	1	1	1	Rcan1, Xk
GO:0045663	BP	e	positive regulation of myoblast differentiation	2/390	26/32695	0.0382	n.a.	2	1	1	1	Boc, Pik3r1
GO:0071361	BP	e	cellular response to ethanol	2/390	26/32695	0.0382	n.a.	2	1	1	1	Itpr2, Prkce
GO:0007010	BP	e	cytoskeleton organization	4/390	106/32695	0.0384	n.a.	4	1	1	1	Ablim2, Capzb, Mark1, Syne3
GO:0072332	BP	e	intrinsic apoptotic signaling pathway by p53 class mediator	2/390	27/32695	0.0409	n.a.	2	1	1	1	Ppp1r13b, Zfp385b
GO:0031032	BP	e	actomyosin structure organization	2/390	27/32695	0.0409	n.a.	2	1	1	1	Cdc42bpb, Limch1
GO:0006139	BP	e	nucleobase-containing compound metabolic process	2/390	27/32695	0.0409	n.a.	2	1	1	1	Ak5, Ak7
GO:0035108	BP	e	limb morphogenesis	2/390	27/32695	0.0409	n.a.	2	1	1	1	Asph, Sik3
GO:0043408	BP	e	regulation of MAPK cascade	3/390	64/32695	0.0411	n.a.	3	1	1	1	Bmp5, Bmp7, Pak4
GO:0032880	BP	e	regulation of protein localization	3/390	65/32695	0.0428	n.a.	3	1	1	1	Nnat, Sik3, Wasl
GO:0016485	BP	e	protein processing	3/390	65/32695	0.0428	n.a.	3	1	1	1	Cpn1, Ece1, Uqcrc1
GO:0003007	BP	e	heart morphogenesis	3/390	65/32695	0.0428	n.a.	3	1	1	1	Insr, Mybpc3, Rxra
GO:0006974	BP	e	cellular response to DNA damage stimulus	10/390	437/32695	0.0433	n.a.	10	1	1	1	Atmin, Eya2, Fanca, Fto, Nfatc2, Park7, Parpbp, Taok3, Topbp1, Zbtb38
GO:0007420	BP	e	brain development	5/390	160/32695	0.0433	n.a.	5	1	1	1	Ak7, Dscaml1, Eml1, Nnat, Ntf3
GO:0002092	BP	e	positive regulation of receptor internalization	2/390	28/32695	0.0437	n.a.	2	1	1	1	Magi2, Ntf3
GO:0055010	BP	e	ventricular cardiac muscle tissue morphogenesis	2/390	28/32695	0.0437	n.a.	2	1	1	1	Mybpc3, Rxra
GO:0048666	BP	e	neuron development	3/390	66/32695	0.0444	n.a.	3	1	1	1	Atp8a2, Ntf3, Runx1
GO:0048468	BP	e	cell development	3/390	66/32695	0.0444	n.a.	3	1	1	1	Bmp5, Bmp7, Prdm16
GO:0008344	BP	e	adult locomotory behavior	3/390	66/32695	0.0444	n.a.	3	1	1	1	Otog, Park7, Tbce
GO:0030154	BP	e	cell differentiation	18/390	932/32695	0.0447	n.a.	18	1	1	1	Bmp5, Bmp7, Cep131, Cspg4, Elf5, Ephb1, Eya2, Insr, Irx4, Musk, Nedd4l, Paqr8, Pax5, Pbx1, Pmp22, Prdm16, Slit3, Zfp750
GO:0042981	BP	e	regulation of apoptotic process	6/390	217/32695	0.0466	n.a.	6	1	1	1	Bmp5, Bmp7, Dlg5, Fas, Ntf3, Rassf5
GO:0017157	BP	e	regulation of exocytosis	2/390	29/32695	0.0466	n.a.	2	1	1	1	Rab21, Rab8b
GO:0019369	BP	e	arachidonic acid metabolic process	2/390	29/32695	0.0466	n.a.	2	1	1	1	Alox12, Dagla
GO:0034332	BP	e	adherens junction organization	2/390	29/32695	0.0466	n.a.	2	1	1	1	Cdh13, Rab8b
GO:0060267	BP	e	positive regulation of respiratory burst	1/390	4/32695	0.0469	n.a.	1	1	1	1	Insr
GO:0010735	BP	e	positive regulation of transcription via serum response element binding	1/390	4/32695	0.0469	n.a.	1	1	1	1	Srf
GO:0032411	BP	e	positive regulation of transporter activity	1/390	4/32695	0.0469	n.a.	1	1	1	1	Kctd7
GO:1904395	BP	e	positive regulation of skeletal muscle acetylcholine-gated channel clustering	1/390	4/32695	0.0469	n.a.	1	1	1	1	Musk
GO:0014706	BP	e	striated muscle tissue development	1/390	4/32695	0.0469	n.a.	1	1	1	1	Eya2
GO:1990416	BP	e	cellular response to brain-derived neurotrophic factor stimulus	1/390	4/32695	0.0469	n.a.	1	1	1	1	Nfkb1
GO:1902177	BP	e	positive regulation of oxidative stress-induced intrinsic apoptotic signaling pathway	1/390	4/32695	0.0469	n.a.	1	1	1	1	Park7
GO:0098904	BP	e	regulation of AV node cell action potential	1/390	4/32695	0.0469	n.a.	1	1	1	1	Gja5
GO:0010560	BP	e	positive regulation of glycoprotein biosynthetic process	1/390	4/32695	0.0469	n.a.	1	1	1	1	Insr
GO:0060083	BP	e	smooth muscle contraction involved in micturition	1/390	4/32695	0.0469	n.a.	1	1	1	1	Cacna1c
GO:1903202	BP	e	negative regulation of oxidative stress-induced cell death	1/390	4/32695	0.0469	n.a.	1	1	1	1	Park7
GO:0030043	BP	e	actin filament fragmentation	1/390	4/32695	0.0469	n.a.	1	1	1	1	Wdr1
GO:0032348	BP	e	negative regulation of aldosterone biosynthetic process	1/390	4/32695	0.0469	n.a.	1	1	1	1	Bmp5
GO:0001805	BP	e	positive regulation of type III hypersensitivity	1/390	4/32695	0.0469	n.a.	1	1	1	1	Fcgr1
GO:0036091	BP	e	positive regulation of transcription from RNA polymerase II promoter in response to oxidative stress	1/390	4/32695	0.0469	n.a.	1	1	1	1	Chd6
GO:0043378	BP	e	positive regulation of CD8-positive, alpha-beta T cell differentiation	1/390	4/32695	0.0469	n.a.	1	1	1	1	Runx1
GO:0050904	BP	e	diapedesis	1/390	4/32695	0.0469	n.a.	1	1	1	1	Pecam1
GO:0030029	BP	e	actin filament-based process	1/390	4/32695	0.0469	n.a.	1	1	1	1	Elmo1
GO:0098989	BP	e	NMDA selective glutamate receptor signaling pathway	1/390	4/32695	0.0469	n.a.	1	1	1	1	Camk2a
GO:0032053	BP	e	ciliary basal body organization	1/390	4/32695	0.0469	n.a.	1	1	1	1	Crocc
GO:0010883	BP	e	regulation of lipid storage	1/390	4/32695	0.0469	n.a.	1	1	1	1	Fto
GO:0060686	BP	e	negative regulation of prostatic bud formation	1/390	4/32695	0.0469	n.a.	1	1	1	1	Bmp7
GO:0022028	BP	e	tangential migration from the subventricular zone to the olfactory bulb	1/390	4/32695	0.0469	n.a.	1	1	1	1	Srf
GO:0071896	BP	e	protein localization to adherens junction	1/390	4/32695	0.0469	n.a.	1	1	1	1	Dlg5
GO:0060534	BP	e	trachea cartilage development	1/390	4/32695	0.0469	n.a.	1	1	1	1	Srf
GO:0060393	BP	e	regulation of pathway-restricted SMAD protein phosphorylation	1/390	4/32695	0.0469	n.a.	1	1	1	1	Bmp7
GO:0003257	BP	e	positive regulation of transcription from RNA polymerase II promoter involved in myocardial precursor cell differentiation	1/390	4/32695	0.0469	n.a.	1	1	1	1	Srf
GO:2000348	BP	e	regulation of CD40 signaling pathway	1/390	4/32695	0.0469	n.a.	1	1	1	1	Fanca
GO:0046340	BP	e	diacylglycerol catabolic process	1/390	4/32695	0.0469	n.a.	1	1	1	1	Dagla
GO:0071322	BP	e	cellular response to carbohydrate stimulus	1/390	4/32695	0.0469	n.a.	1	1	1	1	Nfkb1
GO:2000630	BP	e	positive regulation of miRNA metabolic process	1/390	4/32695	0.0469	n.a.	1	1	1	1	Nfkb1
GO:0048069	BP	e	eye pigmentation	1/390	4/32695	0.0469	n.a.	1	1	1	1	Hps1
GO:0019087	BP	e	transformation of host cell by virus	1/390	4/32695	0.0469	n.a.	1	1	1	1	Insr
GO:0007258	BP	e	JUN phosphorylation	1/390	4/32695	0.0469	n.a.	1	1	1	1	Mapk8ip1
GO:0019048	BP	e	modulation by virus of host morphology or physiology	1/390	4/32695	0.0469	n.a.	1	1	1	1	Rxra
GO:0006198	BP	e	cAMP catabolic process	1/390	4/32695	0.0469	n.a.	1	1	1	1	Pde2a
GO:0070100	BP	e	negative regulation of chemokine-mediated signaling pathway	1/390	4/32695	0.0469	n.a.	1	1	1	1	Slit3
GO:0009994	BP	e	oocyte differentiation	1/390	4/32695	0.0469	n.a.	1	1	1	1	Lgr5
GO:0002520	BP	e	immune system development	1/390	4/32695	0.0469	n.a.	1	1	1	1	Cacna1c
GO:0010310	BP	e	regulation of hydrogen peroxide metabolic process	1/390	4/32695	0.0469	n.a.	1	1	1	1	Insr
GO:0032815	BP	e	negative regulation of natural killer cell activation	1/390	4/32695	0.0469	n.a.	1	1	1	1	Rhbdd3
GO:0051490	BP	e	negative regulation of filopodium assembly	1/390	4/32695	0.0469	n.a.	1	1	1	1	Capzb
GO:0002673	BP	e	regulation of acute inflammatory response	1/390	4/32695	0.0469	n.a.	1	1	1	1	Rhbdd3
GO:0010359	BP	e	regulation of anion channel activity	1/390	4/32695	0.0469	n.a.	1	1	1	1	Hk1
GO:2000065	BP	e	negative regulation of cortisol biosynthetic process	1/390	4/32695	0.0469	n.a.	1	1	1	1	Bmp5
GO:0097050	BP	e	type B pancreatic cell apoptotic process	1/390	4/32695	0.0469	n.a.	1	1	1	1	Psmd9
GO:0007023	BP	e	post-chaperonin tubulin folding pathway	1/390	4/32695	0.0469	n.a.	1	1	1	1	Tbce
GO:0038027	BP	e	apolipoprotein A-I-mediated signaling pathway	1/390	4/32695	0.0469	n.a.	1	1	1	1	Abca7
GO:1900825	BP	e	regulation of membrane depolarization during cardiac muscle cell action potential	1/390	4/32695	0.0469	n.a.	1	1	1	1	Gja5
GO:1905037	BP	e	autophagosome organization	1/390	4/32695	0.0469	n.a.	1	1	1	1	Pik3c2b
GO:0021545	BP	e	cranial nerve development	1/390	4/32695	0.0469	n.a.	1	1	1	1	Ephb1
GO:0033561	BP	e	regulation of water loss via skin	1/390	4/32695	0.0469	n.a.	1	1	1	1	Srf
GO:0045619	BP	e	regulation of lymphocyte differentiation	1/390	4/32695	0.0469	n.a.	1	1	1	1	Fas
GO:0060528	BP	e	secretory columnal luminar epithelial cell differentiation involved in prostate glandular acinus development	1/390	4/32695	0.0469	n.a.	1	1	1	1	Rxra
GO:0043137	BP	e	DNA replication, removal of RNA primer	1/390	4/32695	0.0469	n.a.	1	1	1	1	Rnaseh2a
GO:0007389	BP	e	pattern specification process	3/390	68/32695	0.0478	n.a.	3	1	1	1	Asph, Bmp5, Bmp7
GO:0000209	BP	e	protein polyubiquitination	4/390	114/32695	0.0479	n.a.	4	1	1	1	Nedd4l, Peli2, Rnf31, Ube2cbp
GO:0033674	BP	e	positive regulation of kinase activity	3/390	69/32695	0.0496	n.a.	3	1	1	1	Ephb1, Insr, Musk
GO:0032467	BP	e	positive regulation of cytokinesis	2/390	30/32695	0.0496	n.a.	2	1	1	1	Cdc6, Prkce
GO:0051928	BP	e	positive regulation of calcium ion transport	2/390	30/32695	0.0496	n.a.	2	1	1	1	Camk2a, Lpar3
GO:0051491	BP	e	positive regulation of filopodium assembly	2/390	30/32695	0.0496	n.a.	2	1	1	1	Srf, Wasl
GO:0007186	BP	p	G-protein coupled receptor signaling pathway	5/390	1651/32695	0.000155	n.a.	5	1	1	1	Atrnl1, Insr, Lgr5, Lpar3, Olfr56
GO:0007608	BP	p	sensory perception of smell	2/390	1114/32695	0.000334	n.a.	2	1	1	1	Olfr56, Pde1c
