# Supplementary material for: Dietary Restriction and Rapamycin Affect Brain Aging in Mice by Attenuating Age-Related DNA Methylation Changes
Source: Genes (Basel). 2022 Apr 15;13(4):699. doi: 10.3390/genes13040699 (PMC9030181; doi:10.3390/genes13040699)
Supplement: Supplementary file 1 [file genes-13-00699-s001.zip › Table S8 - Correlation of methylaion and gene expression of overlap DEGs and DMGs.xlsx]

## Sheet: DR-amelior-UDEG&DMG
GeneSymbol	bin_id	location	pearson corrlation	p-value
Cdh13	chr8@bin_3706_w	chr8:119221446-119221476	-0.0648325	0.81844
Cdh13	chr8@bin_3687_w	chr8:118821220-118821285	0.304529	0.269772
Cdh4	chr2@bin_6747_w	chr2:179735344-179735999	-0.0524371	0.852762
Cux2	chr5@bin_3711_c	chr5:122032557-122032632	-0.00312188	0.99119
Kirrel2	chr7@bin_1161_c	chr7:30452747-30452827	0.0989554	0.725688
Ntsr1	chr2@bin_6822_w	chr2:180522941-180523029	-0.39678	0.143108
Osbpl10	chr9@bin_3731_w	chr9:115158267-115158370	0.713654	0.00280972
Usp29	chr7@bin_169_w	chr7:6781847-6782052	-0.13657	0.627443

## Sheet: DR-amelior-ODEG&DMG
GeneSymbol	bin_id	location	pearson corrlation	p-value
Gm7120	chr13@bin_4002_w	chr13:119596489-119596498	-0.934437	3.41075e-07
Gm7120	chr13@bin_4001_w	chr13:119487170-119489108	-0.889007	9.33802e-06
Ifi47	chr11@bin_1357_w	chr11:49087120-49087241	-0.801133	0.000330833
Bmp7	chr2@bin_6497_c	chr2:172908447-172908555	-0.732896	0.00188203
Ppp1r14a	chr7@bin_1067_w	chr7:29293239-29293403	-0.596784	0.0188428
Tgfbi	chr13@bin_1950_w	chr13:56613463-56613545	-0.498492	0.0585782
Tmem63a	chr1@bin_5504_w	chr1:180945078-180945175	-0.483458	0.0678875
Ms4a7	chr19@bin_682_c	chr19:11323917-11323950	-0.431591	0.108193
Syne3	chr12@bin_3186_c	chr12:104999391-104999476	-0.403814	0.13551
Grn	chr11@bin_4641_w	chr11:102433019-102433140	-0.363377	0.183085
Scara3	chr14@bin_2220_c	chr14:65951111-65951358	-0.343141	0.210521
Pmp22	chr11@bin_2150_w	chr11:63143544-63143623	-0.329278	0.230748
Mbp	chr18@bin_2706_w	chr18:82544024-82544117	-0.324132	0.238553
Fam129b	chr2@bin_1254_w	chr2:32902156-32902241	-0.293761	0.287916
Runx1	chr16@bin_2759_c	chr16:92658895-92659029	-0.281651	0.309166
Bcas1	chr2@bin_6312_c	chr2:170351520-170351565	-0.224965	0.420179
Tns2	chr15@bin_4064_w	chr15:102106612-102106855	-0.0980792	0.728032
Pecam1	chr11@bin_4965_c	chr11:106740221-106740330	-0.0441266	0.875915
Ssc5d	chr7@bin_104_w	chr7:4933182-4933264	-0.0421813	0.881349
C2	chr17@bin_1751_c	chr17:34862721-34863162	-0.0412418	0.883975
C2	chr17@bin_1753_c	chr17:34881755-34881818	-0.01811	0.948923
Slc6a12	chr6@bin_2986_w	chr6:121342125-121342194	0.00693648	0.980426
Irf9	chr14@bin_1762_w	chr14:55603597-55603710	0.035717	0.899439
Itgb2	chr10@bin_2572_w	chr10:77537052-77537142	0.144666	0.606972
Ifit2	chr19@bin_1368_w	chr19:34566846-34566951	0.153225	0.585621
Pcsk6	chr7@bin_2304_w	chr7:65925262-65925377	0.157927	0.574026
Fcgr1	chr3@bin_2619_c	chr3:96286012-96286045	0.177118	0.52772
Ms4a7	chr19@bin_683_c	chr19:11334327-11334453	0.231792	0.405829
Cdc42ep1	chr15@bin_2271_w	chr15:78844247-78844313	0.378154	0.164595
Snx9	chr17@bin_89_w	chr17:5885220-5885229	0.427715	0.111754
Gm14005	chr2@bin_4166_c	chr2:128340318-128340366	0.481987	0.068852
Bicc1	chr10@bin_2239_c	chr10:71025306-71025490	0.486813	0.0657234
Slc14a1	chr18@bin_2511_c	chr18:78115568-78116448	0.545523	0.0354315
S100b	chr10@bin_2459_w	chr10:76257031-76257092	0.875999	1.85773e-05

## Sheet: RALL-amelior-UDEG&DMG
GeneSymbol	bin_id	location	pearson corrlation	p-value
Osbpl10	chr9@bin_3731_w	chr9:115158267-115158370	0.713654	0.00280972
Clic6	chr16@bin_2748_w	chr16:92518438-92518511	0.0848303	0.763731
Kirrel2	chr7@bin_1161_c	chr7:30452747-30452827	0.0989554	0.725688

## Sheet: RALL-amelior-ODEG&DMG
GeneSymbol	bin_id	location	pearson corrlation	p-value
S100b	chr10@bin_2459_w	chr10:76257031-76257092	0.875999	1.85773e-05
Gm14005	chr2@bin_4166_c	chr2:128340318-128340366	0.481987	0.068852
Snx9	chr17@bin_89_w	chr17:5885220-5885229	0.427715	0.111754
Pcsk6	chr7@bin_2304_w	chr7:65925262-65925377	0.157927	0.574026
Ifit2	chr19@bin_1368_w	chr19:34566846-34566951	0.153225	0.585621
Itgb2	chr10@bin_2572_w	chr10:77537052-77537142	0.144666	0.606972
Cd9	chr6@bin_3182_c	chr6:125468750-125468833	0.000589493	0.998336
Plin3	chr17@bin_2823_c	chr17:56286622-56286691	0.00057717	0.998371
C2	chr17@bin_1753_c	chr17:34881755-34881818	-0.01811	0.948923
C2	chr17@bin_1751_c	chr17:34862721-34863162	-0.0412418	0.883975
Ssc5d	chr7@bin_104_w	chr7:4933182-4933264	-0.0421813	0.881349
Tns2	chr15@bin_4064_w	chr15:102106612-102106855	-0.0980792	0.728032
Runx1	chr16@bin_2772_c	chr16:92809426-92809529	-0.169848	0.545063
Bcas1	chr2@bin_6312_c	chr2:170351520-170351565	-0.224965	0.420179
Runx1	chr16@bin_2759_c	chr16:92658895-92659029	-0.281651	0.309166
Eya2	chr2@bin_5790_w	chr2:165732727-165733113	-0.287487	0.298814
Fam129b	chr2@bin_1254_w	chr2:32902156-32902241	-0.293761	0.287916
Mbp	chr18@bin_2706_w	chr18:82544024-82544117	-0.324132	0.238553
Pmp22	chr11@bin_2150_w	chr11:63143544-63143623	-0.329278	0.230748
Scara3	chr14@bin_2220_c	chr14:65951111-65951358	-0.343141	0.210521
Grn	chr11@bin_4641_w	chr11:102433019-102433140	-0.363377	0.183085
Ppp1r14a	chr7@bin_1067_w	chr7:29293239-29293403	-0.596784	0.0188428
Gm7120	chr13@bin_4001_w	chr13:119487170-119489108	-0.889007	9.33802e-06
Gm7120	chr13@bin_4002_w	chr13:119596489-119596498	-0.934437	3.41075e-07

## Sheet: Genes enriched in GO terms
Genes enriched in nervous system development (GO:0007399)
GeneSymbol	bin_id	location	pearson corrlation	p-value
Dscaml1	chr9@bin_1175_w	chr9:45686613-45686639	0.20935	0.453962
Ephb1	chr9@bin_3076_c	chr9:102115401-102115513	0.189426	0.498938
Tcf12	chr9@bin_2313_c	chr9:72093756-72093864	0.0560829	0.842639
Dscaml1	chr9@bin_1161_w	chr9:45454069-45454165	0.0548642	0.84602
Dscaml1	chr9@bin_1163_w	chr9:45504871-45504959	-0.00539677	0.984771
Ephb1	chr9@bin_3085_c	chr9:102264885-102265005	-0.054578	0.846815
Nav1	chr1@bin_3934_c	chr1:135470862-135471087	-0.155438	0.580151
Kalrn	chr16@bin_1247_c	chr16:34243926-34243991	-0.158798	0.571888
Dscaml1	chr9@bin_1168_w	chr9:45555188-45555285	-0.214217	0.44329
Arid1b	chr17@bin_62_w	chr17:5346522-5347038	-0.226004	0.417979
Mdga1	chr17@bin_1393_c	chr17:29864162-29864268	-0.248867	0.371091
Grip1	chr10@bin_4336_w	chr10:119730444-119730527	-0.325627	0.236269
Ngfr	chr11@bin_3892_c	chr11:95577745-95577874	-0.334075	0.223616
Nav2	chr7@bin_2006_w	chr7:49300494-49300507	-0.381373	0.160737
Ephb2	chr4@bin_4835_c	chr4:136761960-136762040	-0.426246	0.113124
Ephb1	chr9@bin_3086_c	chr9:102274105-102274218	-0.491678	0.0626743
Nav1	chr1@bin_3937_c	chr1:135502252-135502293	-0.580847	0.0231715
Genes enriched in neuron migration (GO:0001764)
GeneSymbol	bin_id	location	pearson corrlation	p-value
Sdccag8	chr1@bin_5313_w	chr1:176983780-176983842	0.179087	0.523068
Itga3	chr11@bin_3838_c	chr11:95067706-95068704	0.13926	0.62061
Celsr1	chr15@bin_2971_c	chr15:85975671-85975781	0.0692534	0.806269
Apbb2	chr5@bin_1449_c	chr5:66582351-66582427	-0.070335	0.803298
Auts2	chr5@bin_4357_c	chr5:132169881-132169942	-0.139274	0.620577
Nav1	chr1@bin_3934_c	chr1:135470862-135471087	-0.155438	0.580151
Mdga1	chr17@bin_1393_c	chr17:29864162-29864268	-0.248867	0.371091
Celsr1	chr15@bin_2977_c	chr15:86028057-86028095	-0.315891	0.251391
Nav1	chr1@bin_3937_c	chr1:135502252-135502293	-0.580847	0.0231715
Auts2	chr5@bin_4345_c	chr5:131717718-131717741	-0.687748	0.0046004
