# Supplementary figures and images for: Dietary Restriction and Rapamycin Affect Brain Aging in Mice by Attenuating Age-Related DNA Methylation Changes
Source: MDPI journal article supplement (doi:10.3390/genes13040699), 2022-04-15

# Supplement S12 Figures of Gene Expression and DMR methylation

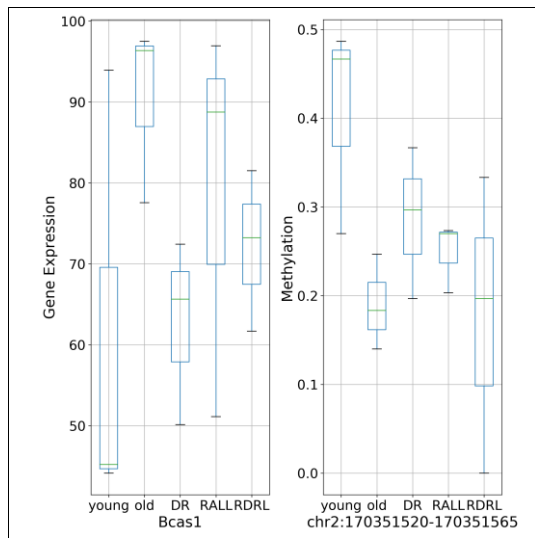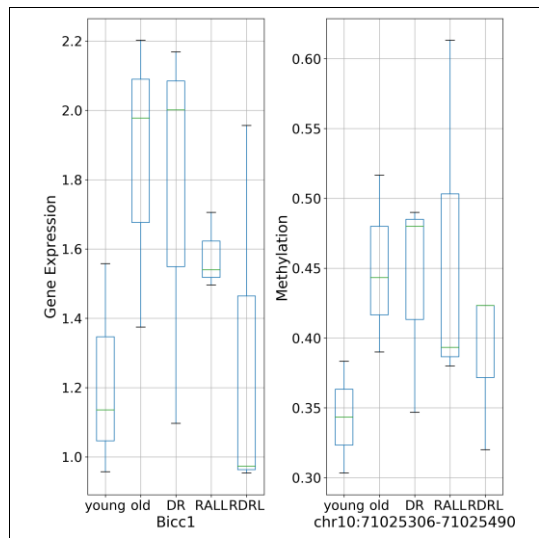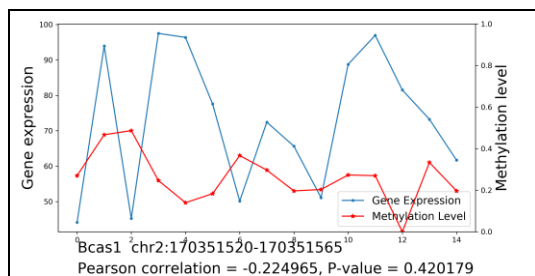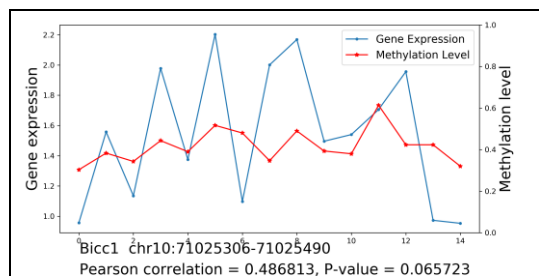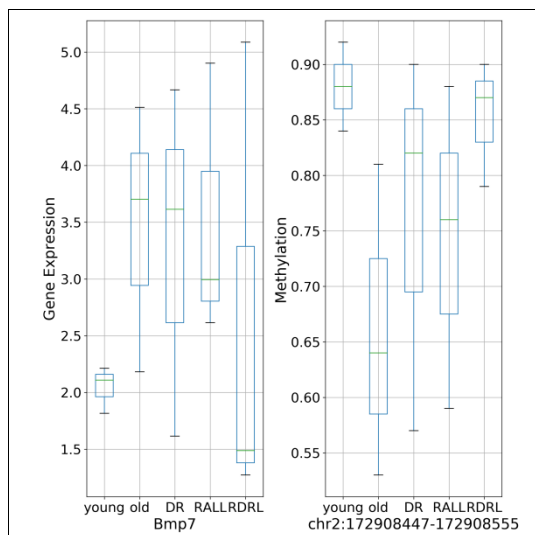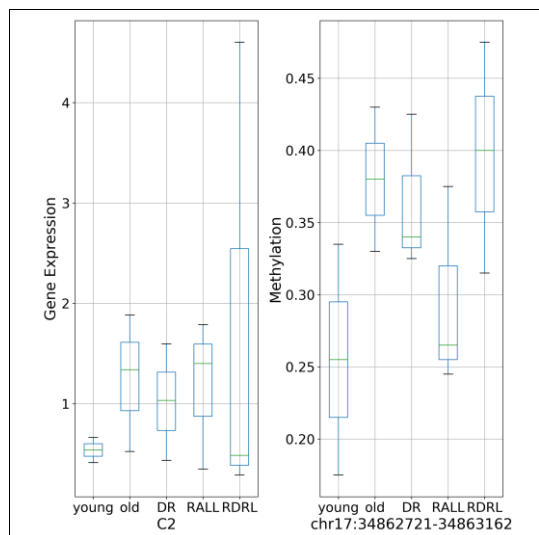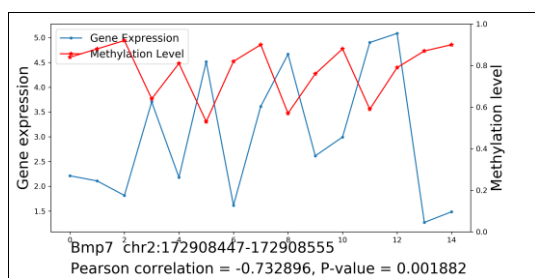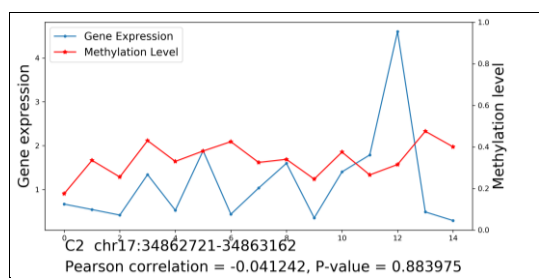

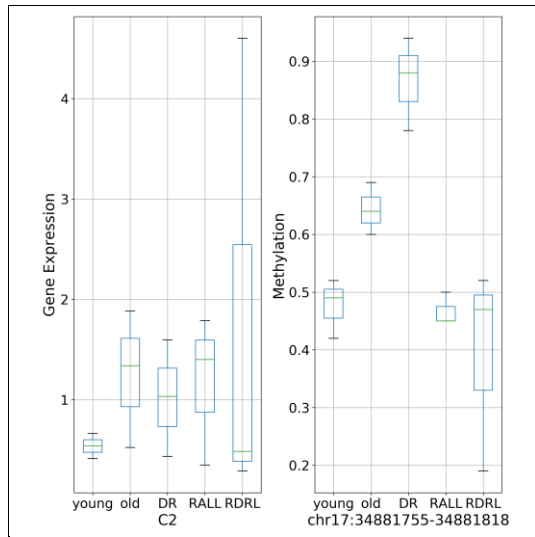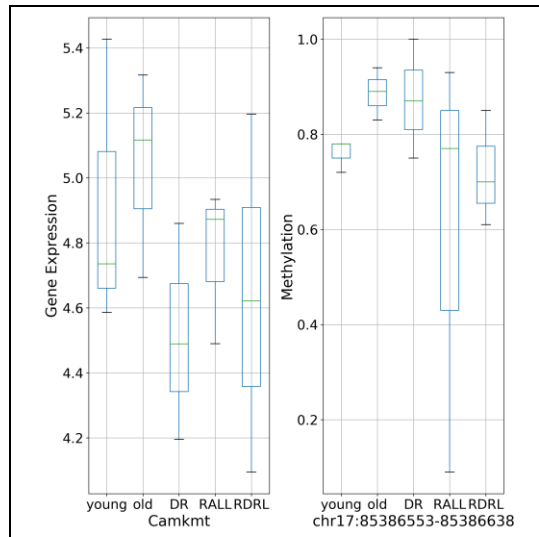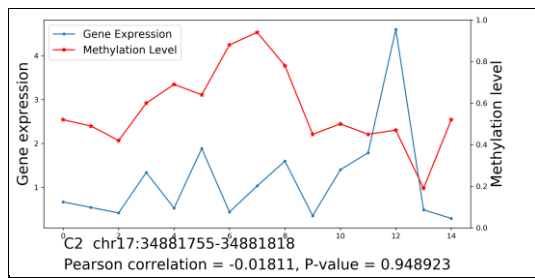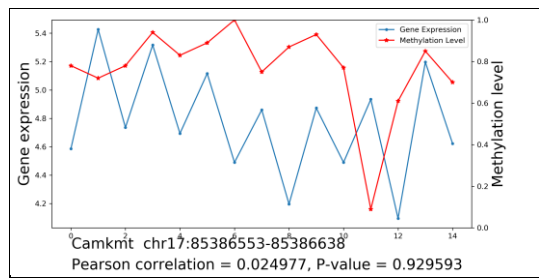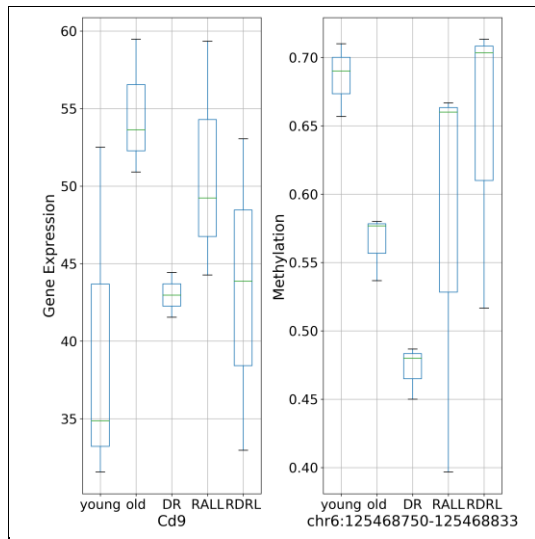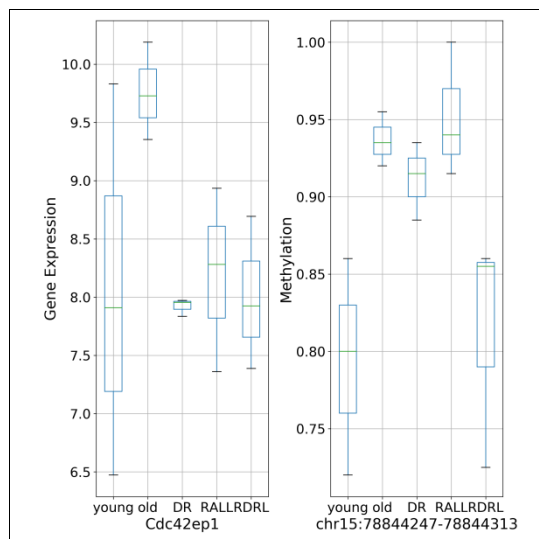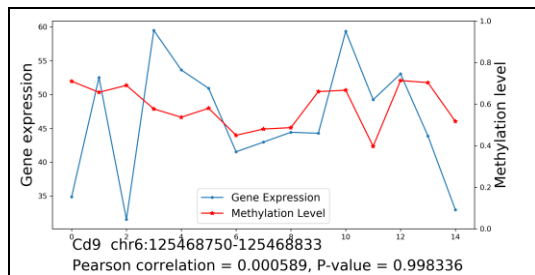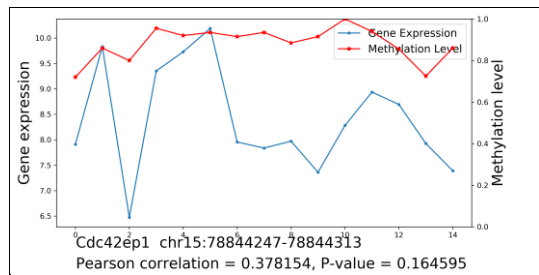

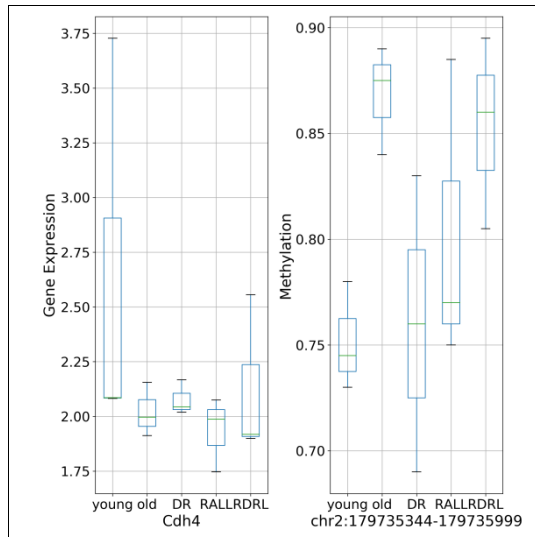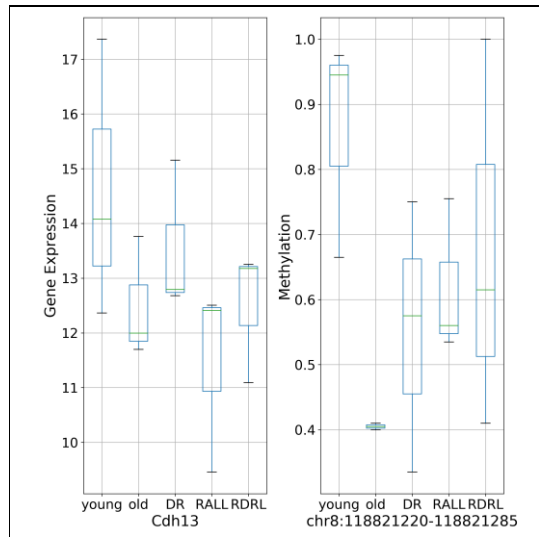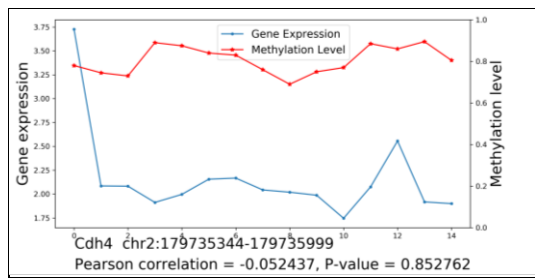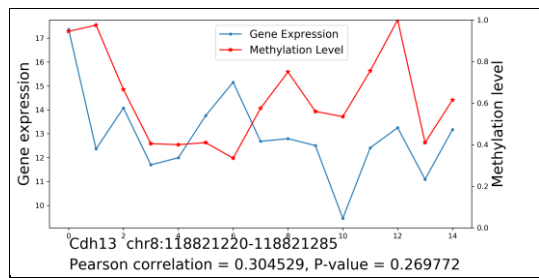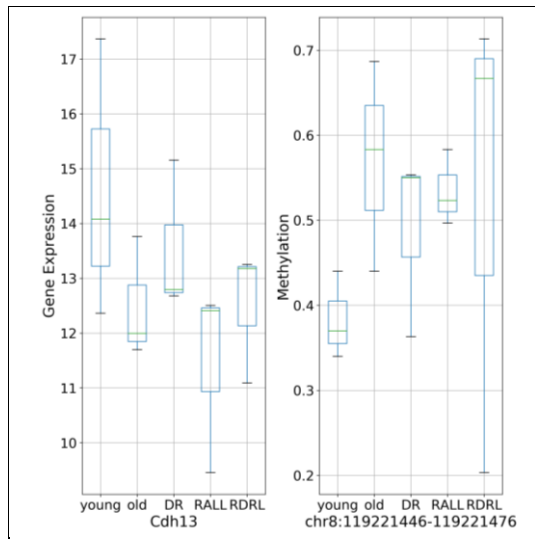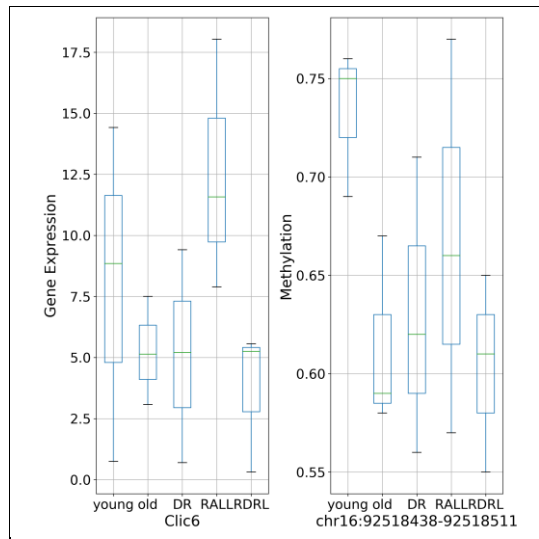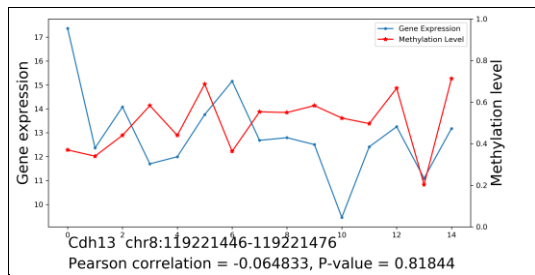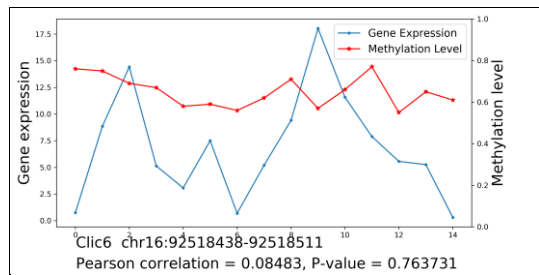

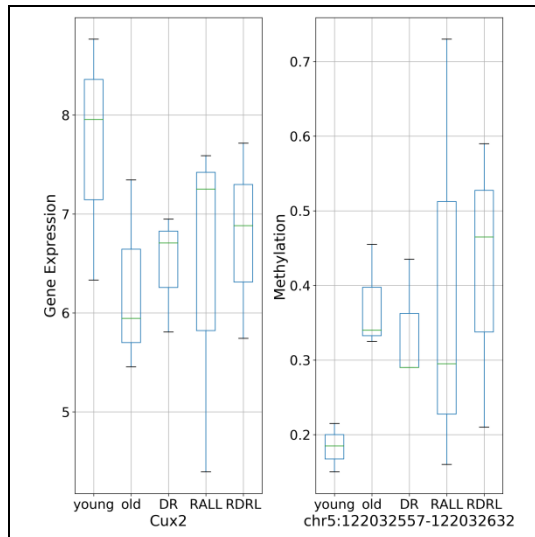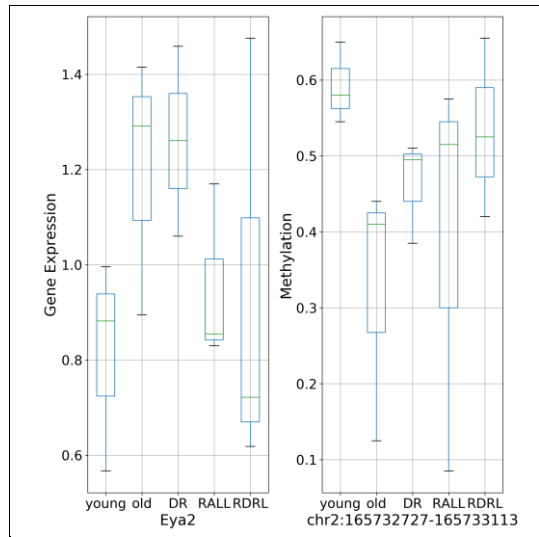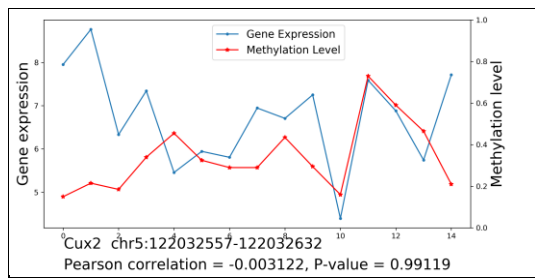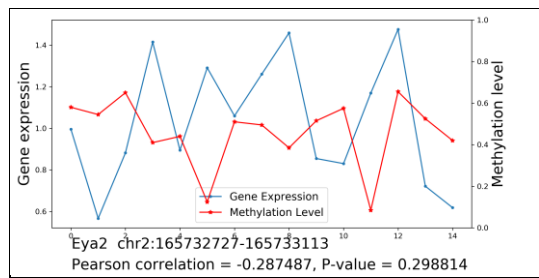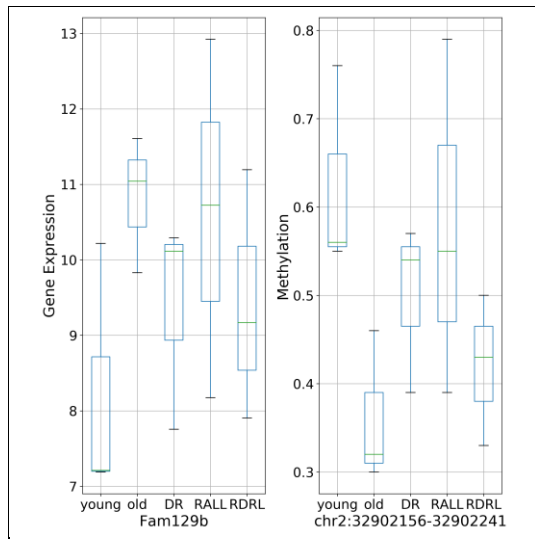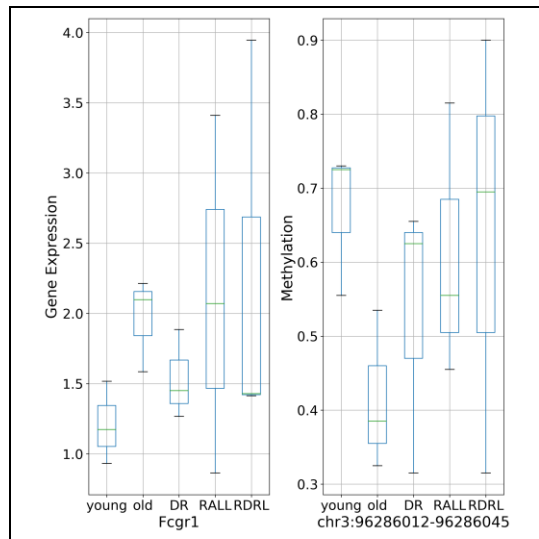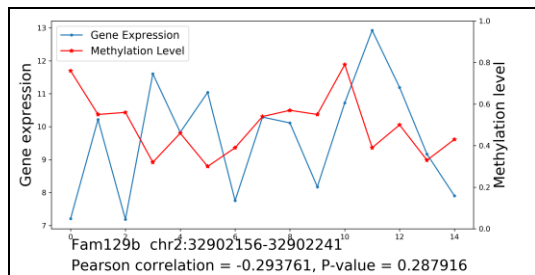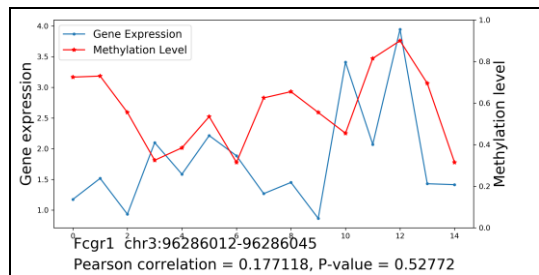

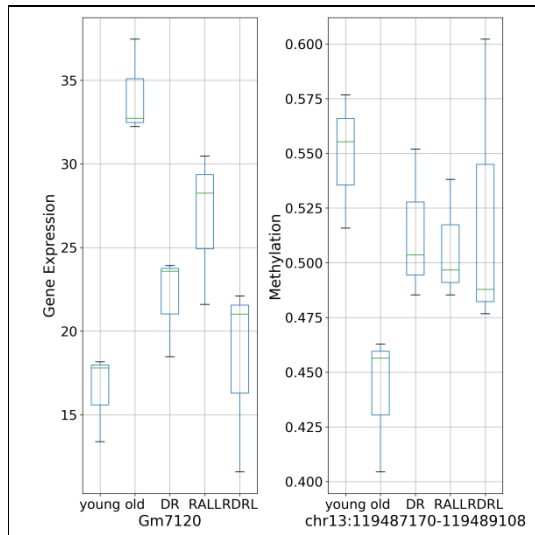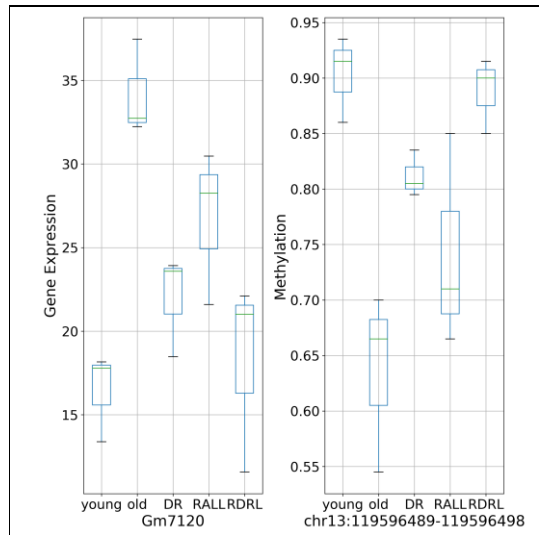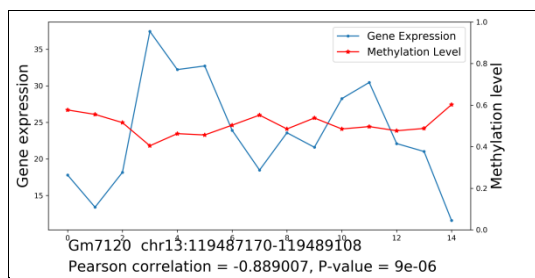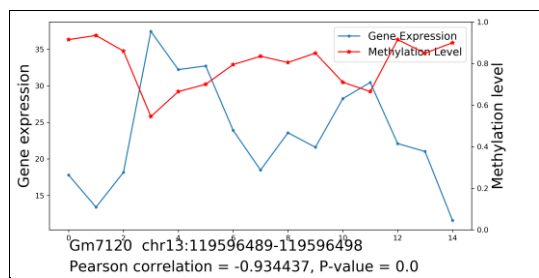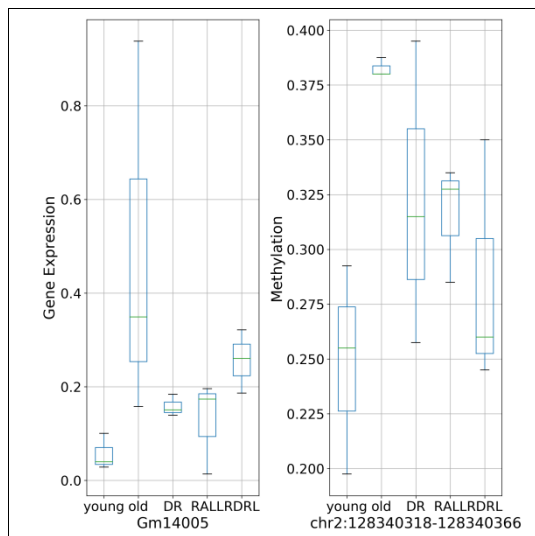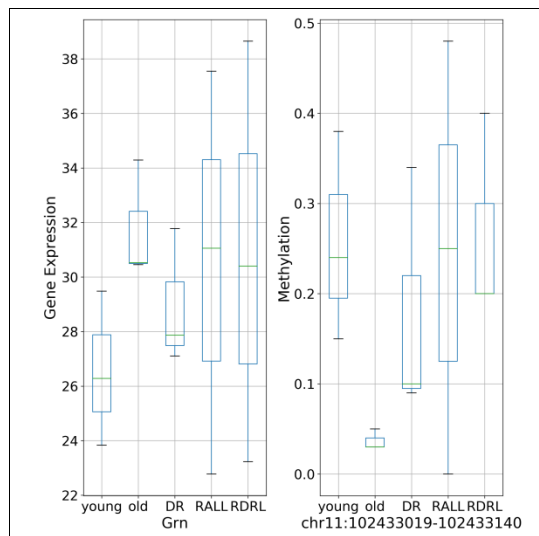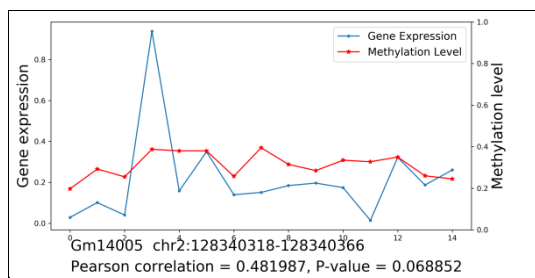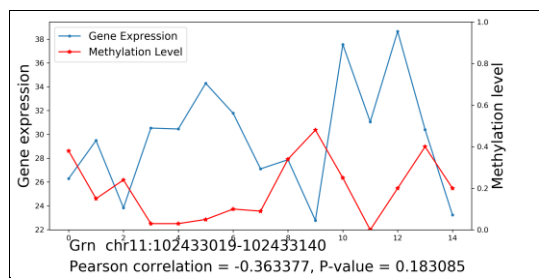

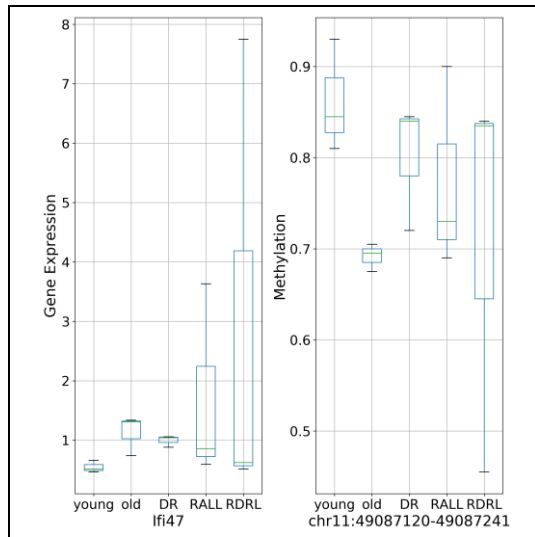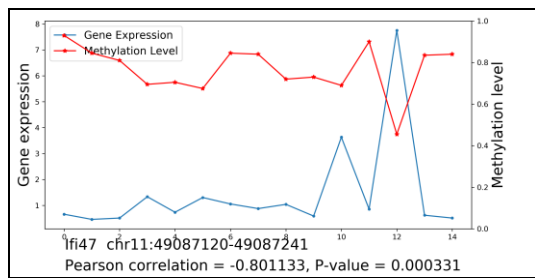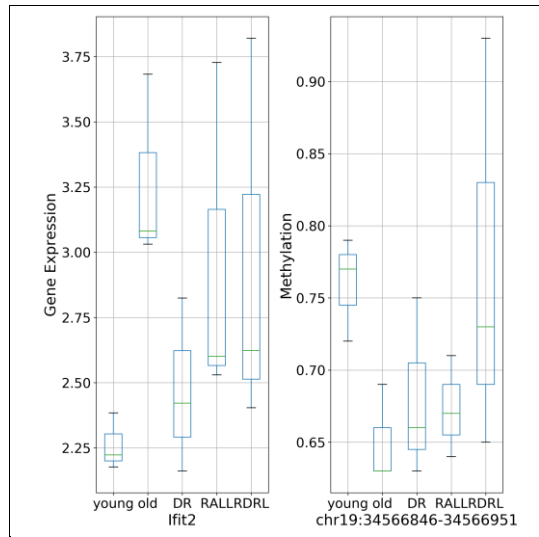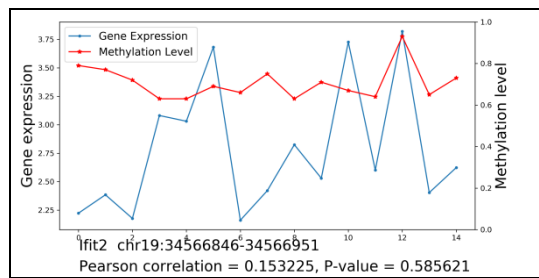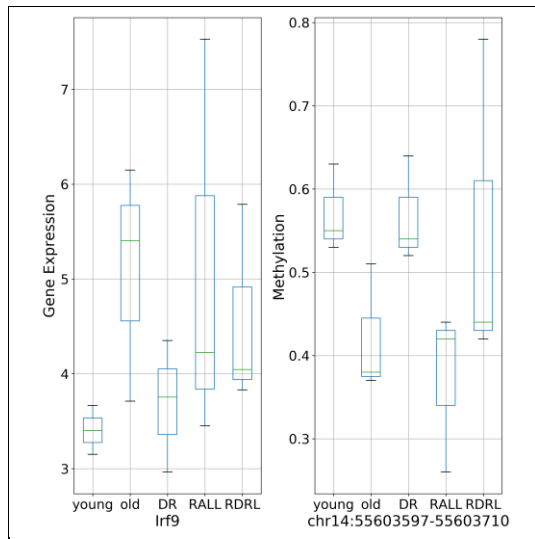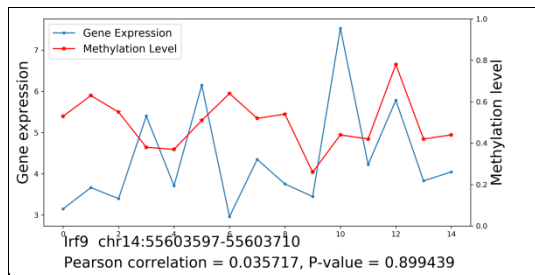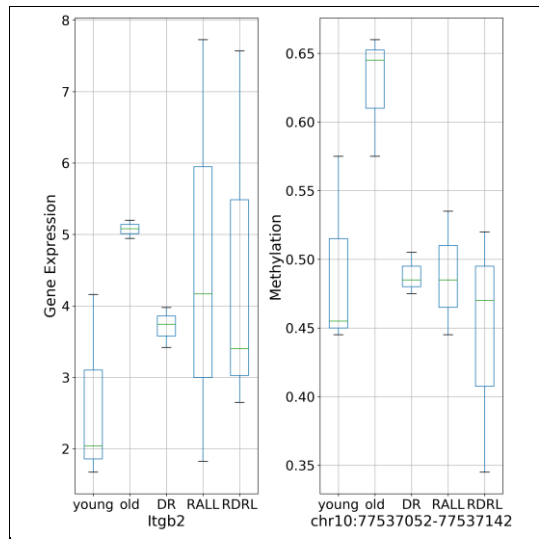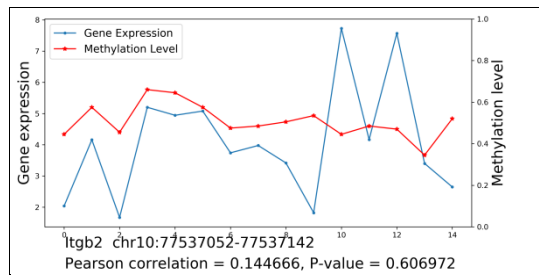

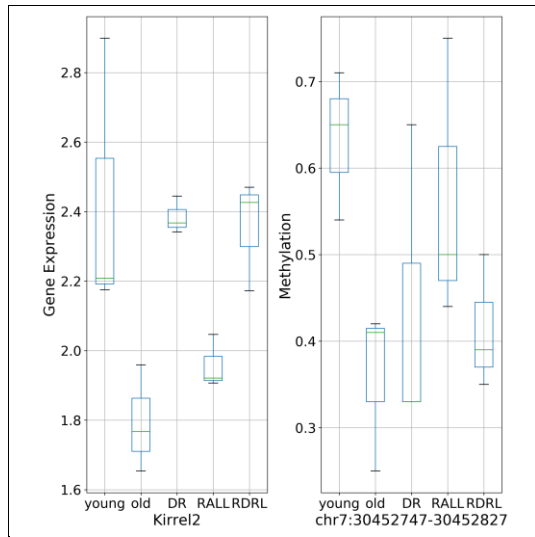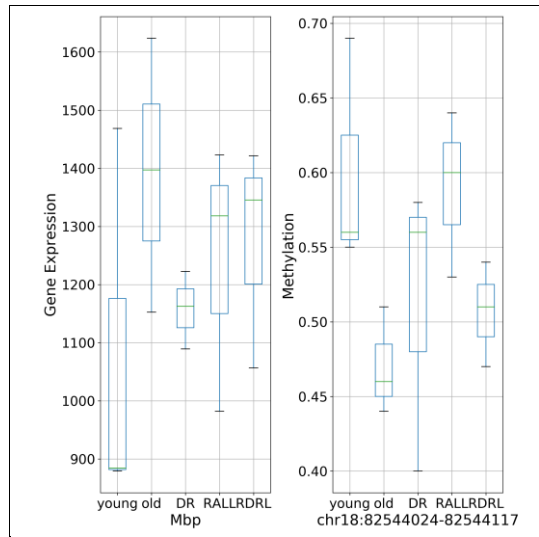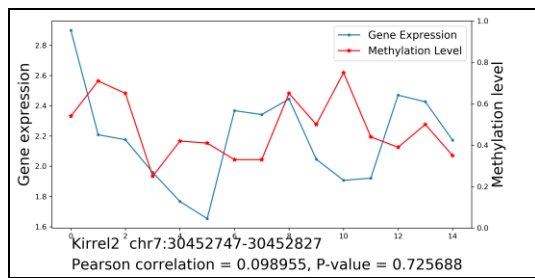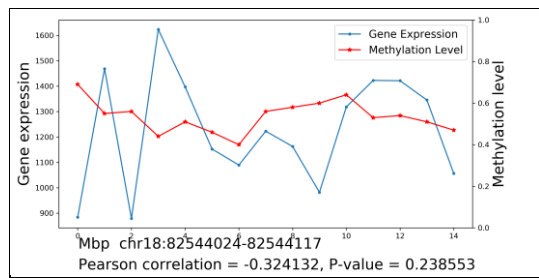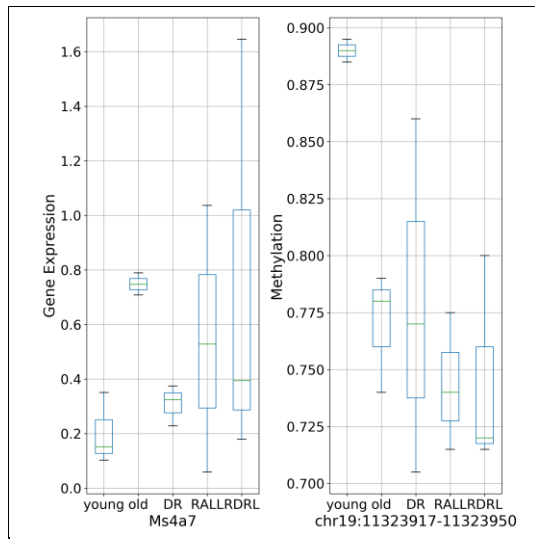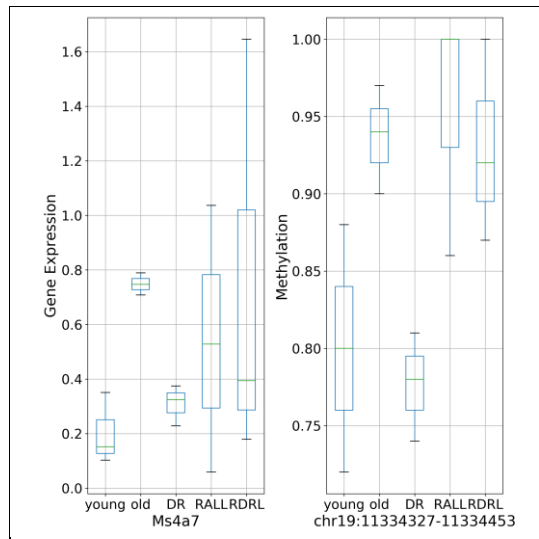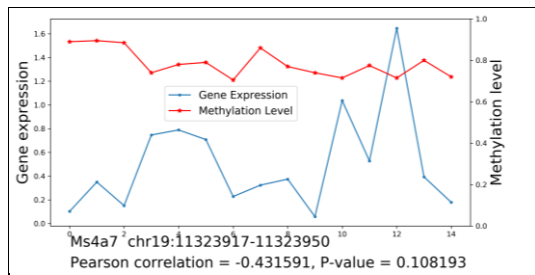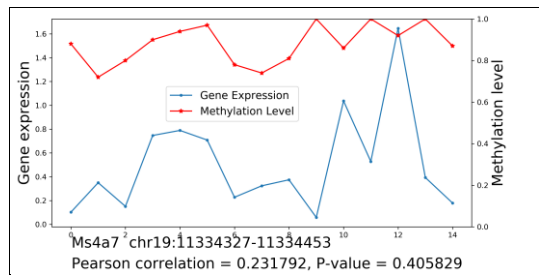

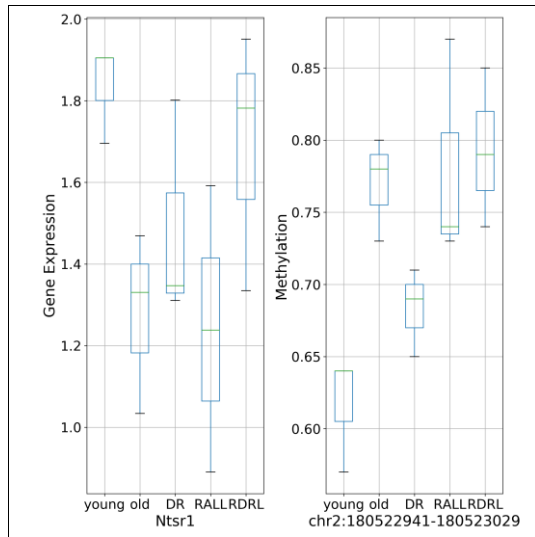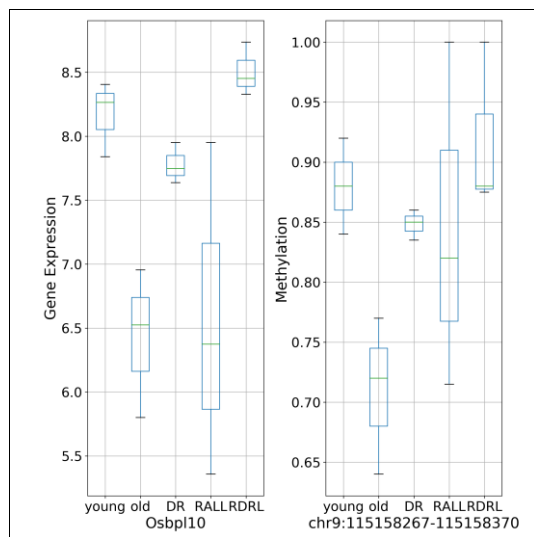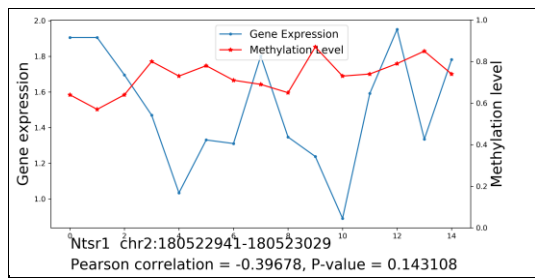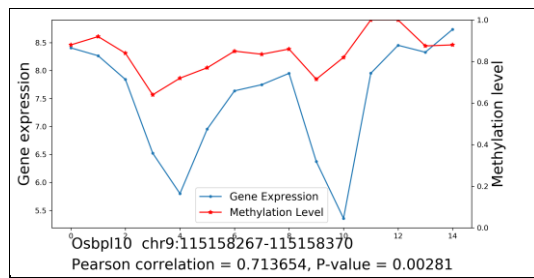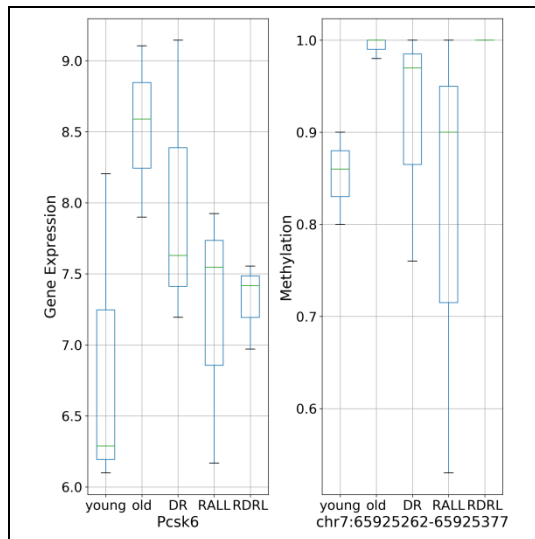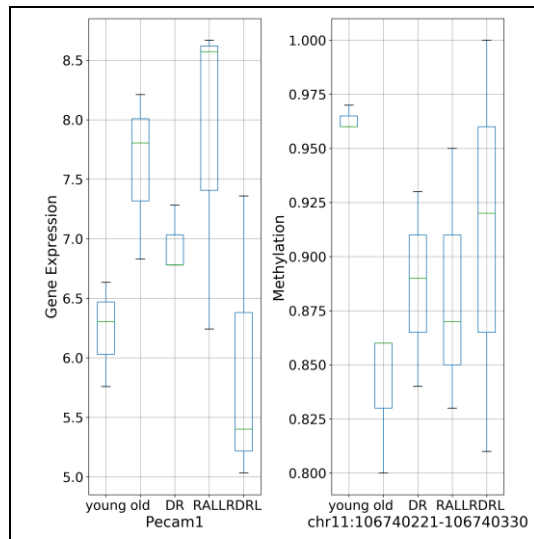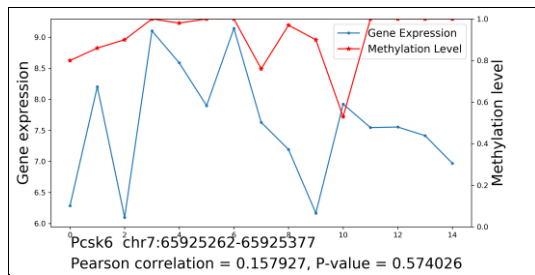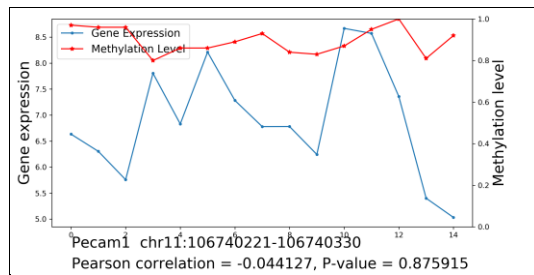



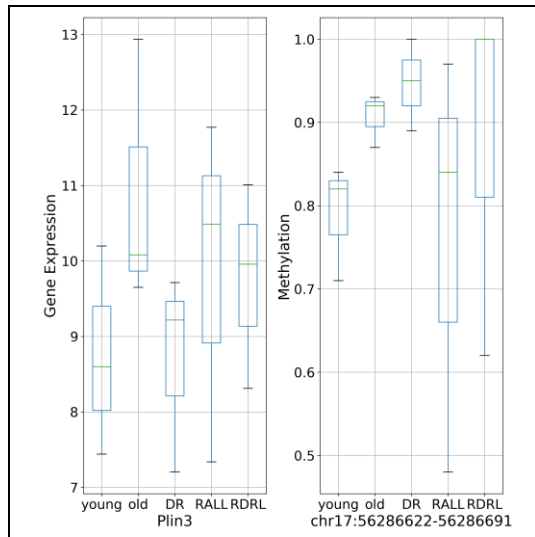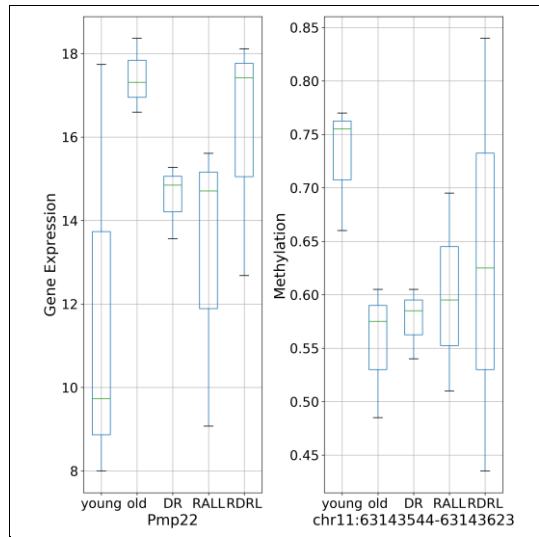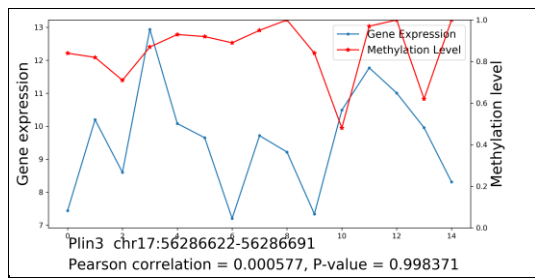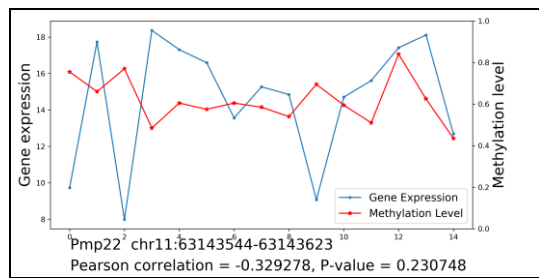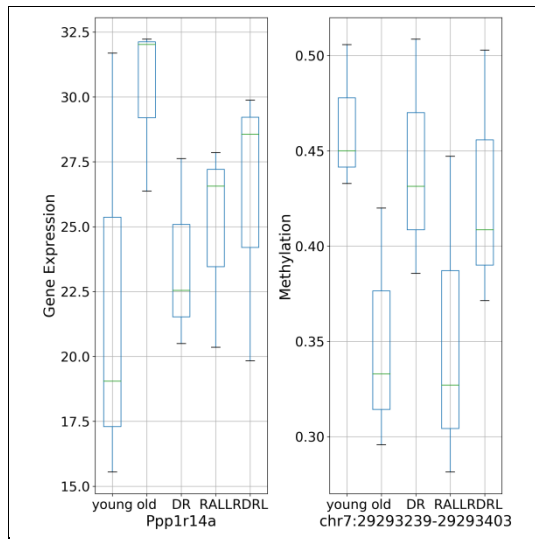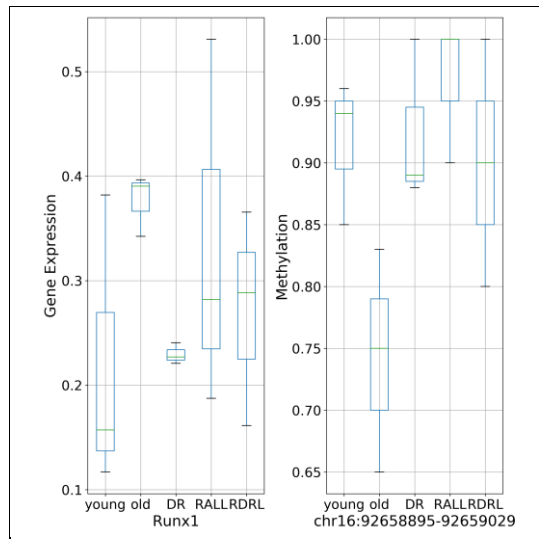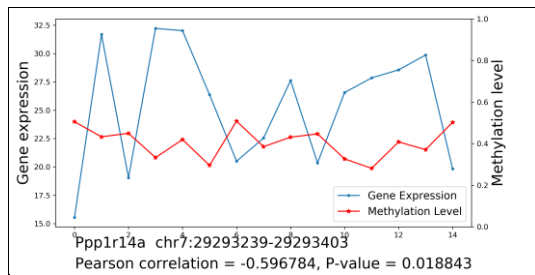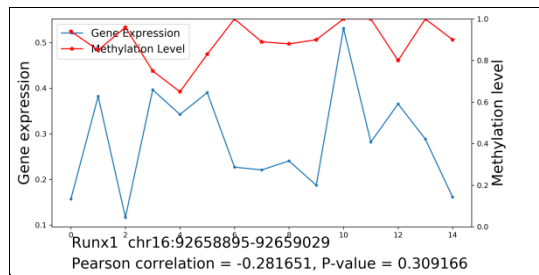

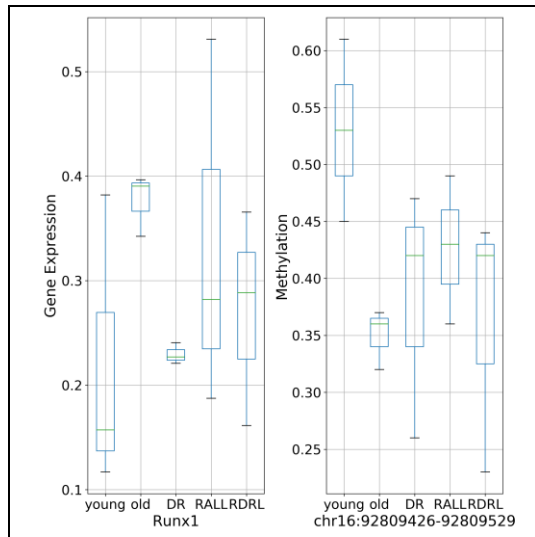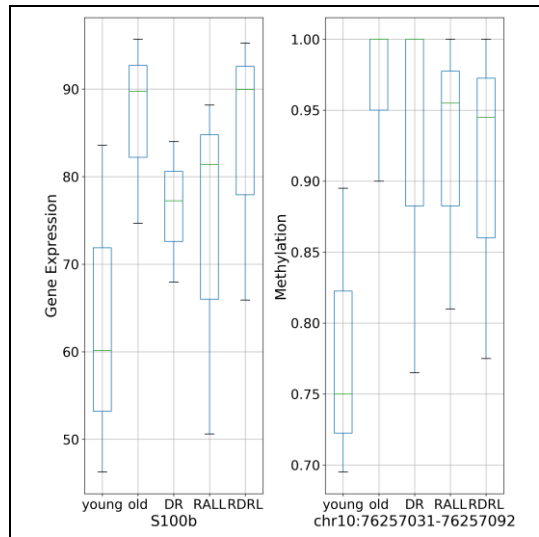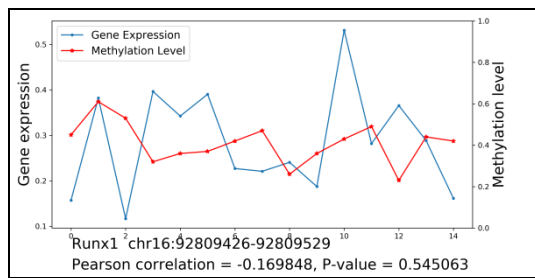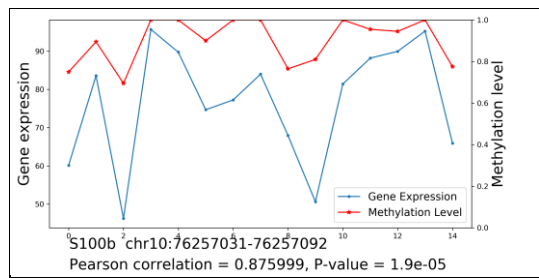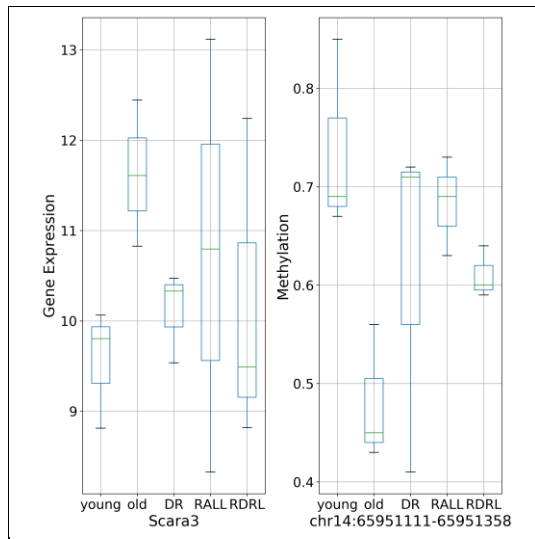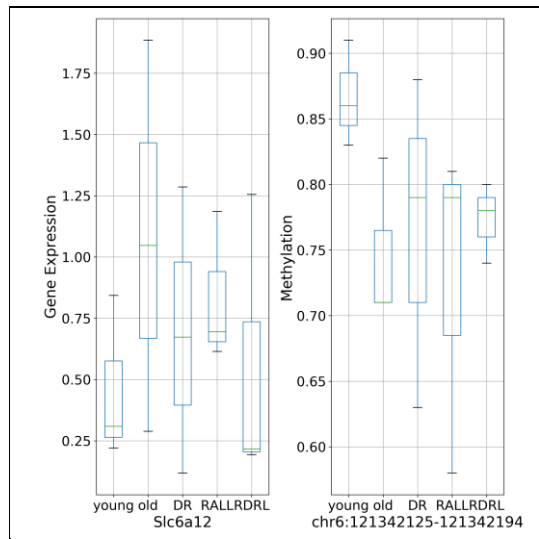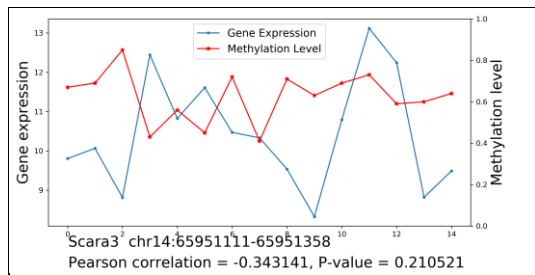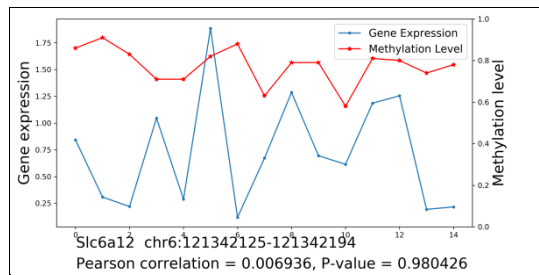

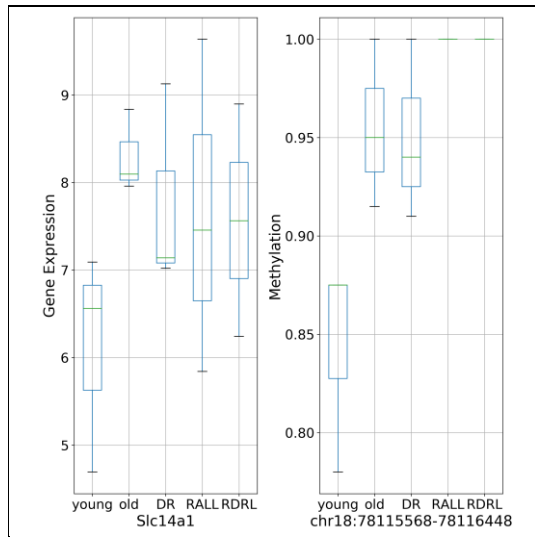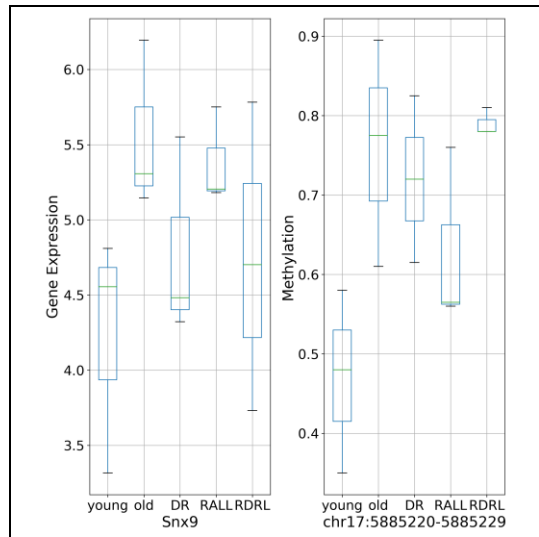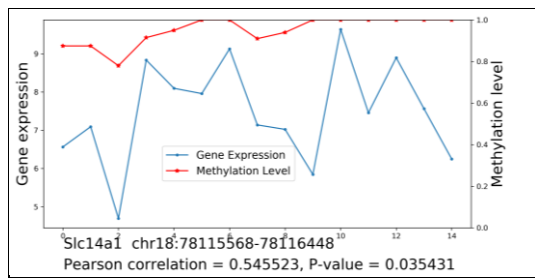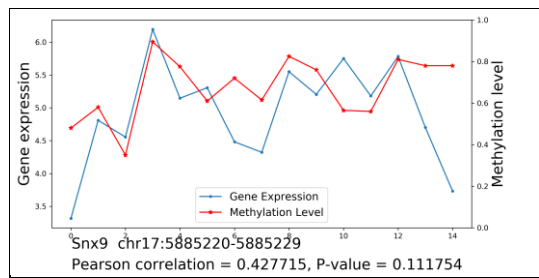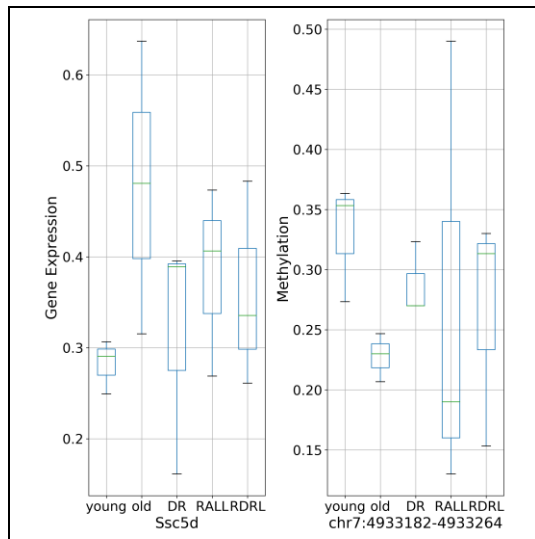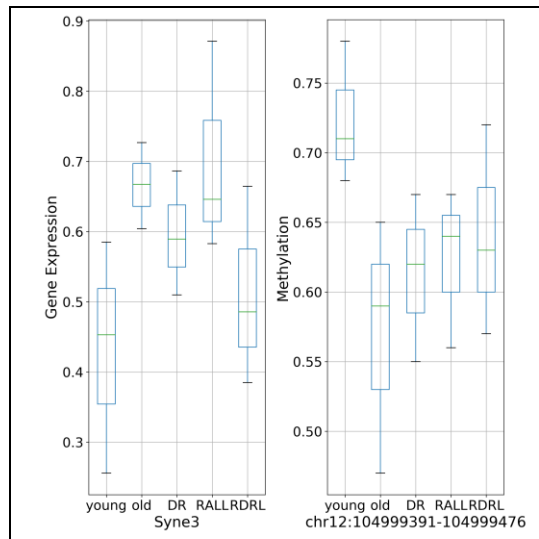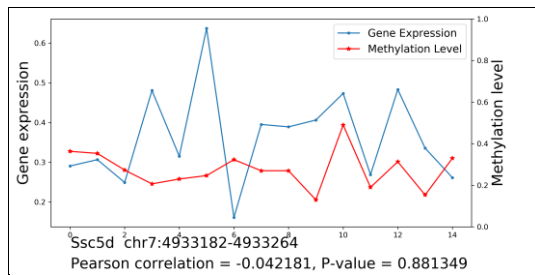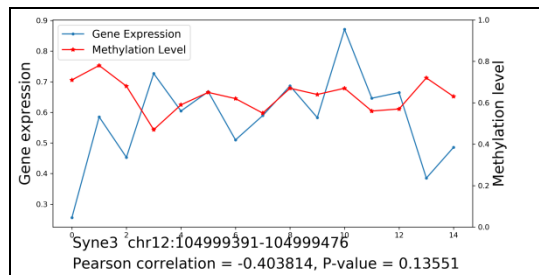

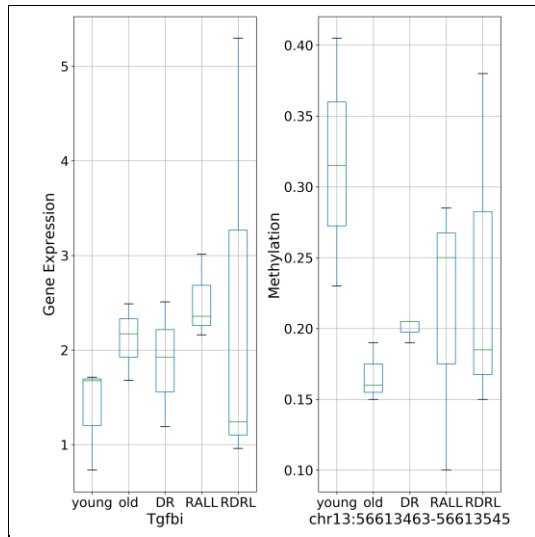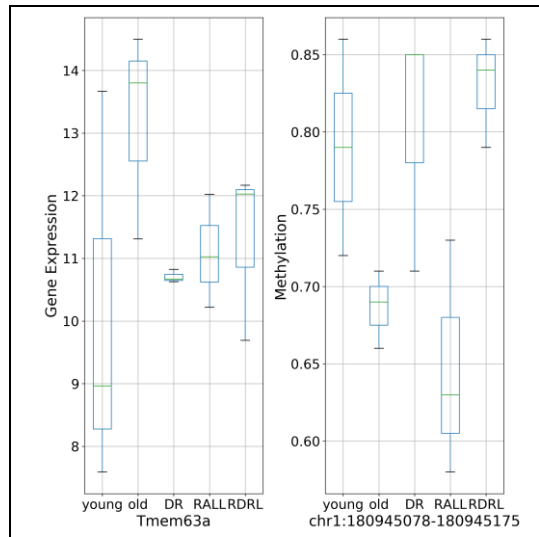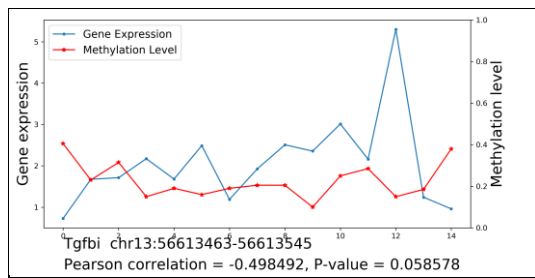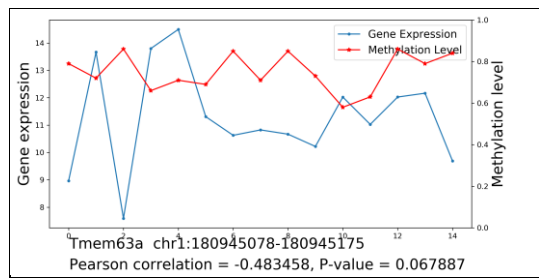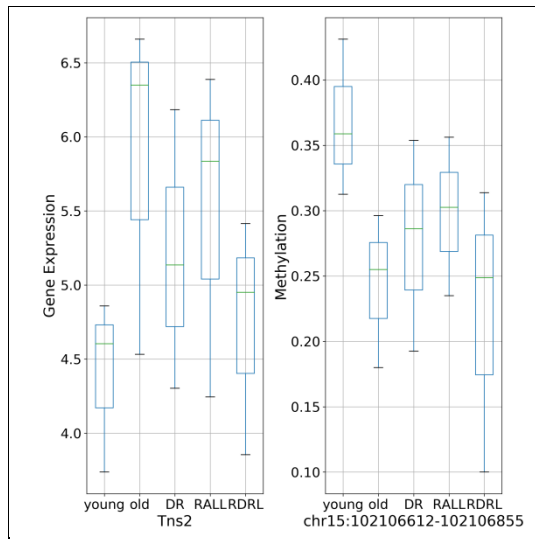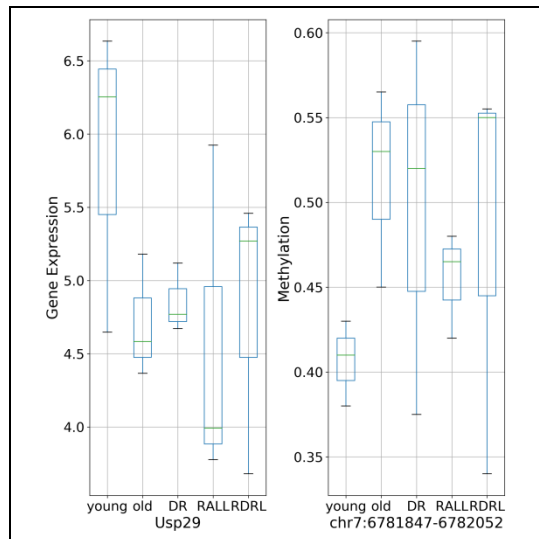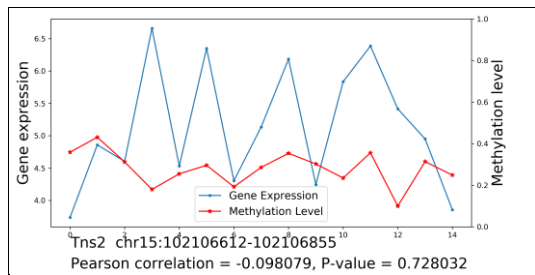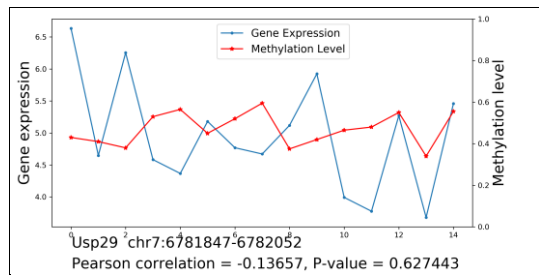

Supplement: s1 [file s1]
